# Supplementary material for: Overexpression of SLIM1 transcription factor accelerates vegetative development in Arabidopsis thaliana
Source: Front Plant Sci. 2024 Mar 20;15:1327152. doi: 10.3389/fpls.2024.1327152 (PMC10988502; doi:10.3389/fpls.2024.1327152)
Supplement: Supplementary file 6 [file Table_1.xlsx]

## Sheet: Figure 1c
Col-0 vs slim1-cr	Mean of Col-0	Mean of slim1-cr	Difference	SE of difference	test	t ratio	df	P value	Adjusted P Value	p-value adjustment method
16DAS	0.3215	0.2558	0.0657	0.0271	t-test	2.424	38	0.0202	0.059384	Benjamini-Yekutieli
23DAS	2.504	0.9828	1.522	0.3117	t-test	4.881	35	2.3e-05	0.000115	Benjamini-Yekutieli
30DAS	6.905	5.223	1.681	0.6558	t-test	2.564	35	0.01481	0.057937	Benjamini-Yekutieli
37DAS	12.13	13.02	-0.8874	1.49	t-test	0.5956	31	0.555735	0.694112	Benjamini-Yekutieli
44DAS	18.23	17.41	0.8201	1.061	t-test	0.7727	25	0.446929	0.694112	Benjamini-Yekutieli
Col-0 vs 35S::SLIM1 #3	Mean of Col-0	Mean of 35S::SLIM1 #3	Difference	SE of difference	test	t ratio	df	P value	Adjusted P Value	p-value adjustment method
16DAS	0.3215	0.764	-0.4425	0.04903	t-test	9.024	38	<0.000001	<0.000001	Benjamini-Yekutieli
23DAS	2.504	4.722	-2.218	0.4088	t-test	5.425	38	3e-06	7e-06	Benjamini-Yekutieli
30DAS	6.905	12.47	-5.569	0.8622	t-test	6.459	38	<0.000001	<0.000001	Benjamini-Yekutieli
37DAS	12.13	21.07	-8.934	1.399	t-test	6.387	34	<0.000001	<0.000001	Benjamini-Yekutieli
44DAS	18.23	22.51	-4.273	0.9993	t-test	4.276	29	0.000188	0.000188	Benjamini-Yekutieli
Col-0 vs 35S::SLIM1 #16	Mean of Col-0	Mean of 35S::SLIM1 #16	Difference	SE of difference	test	t ratio	df	P value	Adjusted P Value	p-value adjustment method
16DAS	0.3215	0.7635	-0.442	0.03724	t-test	11.87	38	<0.000001	<0.000001	Benjamini-Yekutieli
23DAS	2.504	4.164	-1.66	0.3462	t-test	4.795	38	2.5e-05	2.5e-05	Benjamini-Yekutieli
30DAS	6.905	11.68	-4.776	0.7316	t-test	6.528	38	<0.000001	<0.000001	Benjamini-Yekutieli
37DAS	12.13	22.59	-10.46	1.483	t-test	7.052	34	<0.000001	<0.000001	Benjamini-Yekutieli
44DAS	18.23	22.88	-4.652	0.8749	t-test	5.317	29	1.1e-05	2.1e-05	Benjamini-Yekutieli
Col-0 vs 35S::SLIM1 #17	Mean of Col-0	Mean of 35S::SLIM1 #17	Difference	SE of difference	test	t ratio	df	P value	Adjusted P Value	p-value adjustment method
16DAS	0.3215	0.7459	-0.4244	0.04602	t-test	9.221	38	<0.000001	<0.000001	Benjamini-Yekutieli
23DAS	2.504	4.303	-1.799	0.4601	t-test	3.91	38	0.000368	0.000368	Benjamini-Yekutieli
30DAS	6.905	12.14	-5.235	0.9937	t-test	5.268	38	6e-06	1.1e-05	Benjamini-Yekutieli
37DAS	12.13	20.24	-8.111	1.43	t-test	5.672	34	2e-06	9e-06	Benjamini-Yekutieli
44DAS	18.23	23.02	-4.789	0.83	t-test	5.769	29	3e-06	9e-06	Benjamini-Yekutieli
Col-0 vs 35S::SLIM1 #24	Mean of Col-0	Mean of 35S::SLIM1 #24	Difference	SE of difference	test	t ratio	df	P value	Adjusted P Value	p-value adjustment method
16DAS	0.3215	0.83	-0.5086	0.04512	t-test	11.27	38	<0.000001	<0.000001	Benjamini-Yekutieli
23DAS	2.504	5.17	-2.665	0.3729	t-test	7.148	38	<0.000001	<0.000001	Benjamini-Yekutieli
30DAS	6.905	14.21	-7.302	0.7056	t-test	10.35	38	<0.000001	<0.000001	Benjamini-Yekutieli
37DAS	12.13	22.94	-10.81	1.314	t-test	8.229	34	<0.000001	<0.000001	Benjamini-Yekutieli
44DAS	18.23	23.68	-5.451	1.185	t-test	4.602	29	7.7e-05	7.7e-05	Benjamini-Yekutieli
Col-0 vs 35S::SLIM1 #25	Mean of Col-0	Mean of 35S::SLIM1 #25	Difference	SE of difference	test	t ratio	df	P value	Adjusted P Value	p-value adjustment method
16DAS	0.3215	0.7969	-0.4754	0.04676	t-test	10.17	38	<0.000001	<0.000001	Benjamini-Yekutieli
23DAS	2.504	5.307	-2.803	0.5303	t-test	5.285	38	5e-06	1.4e-05	Benjamini-Yekutieli
30DAS	6.905	11.99	-5.087	0.8704	t-test	5.844	38	<0.000001	4e-06	Benjamini-Yekutieli
37DAS	12.13	18.72	-6.591	1.412	t-test	4.667	34	4.6e-05	4.6e-05	Benjamini-Yekutieli
44DAS	18.23	22.18	-3.951	0.7058	t-test	5.597	29	5e-06	1.4e-05	Benjamini-Yekutieli
Col-0 vs 35S::SLIM1 #26	Mean of Col-0	Mean of 35S::SLIM1 #26	Difference	SE of difference	test	t ratio	df	P value	Adjusted P Value	p-value adjustment method
16DAS	0.3215	0.9851	-0.6636	0.05196	t-test	12.77	38	<0.000001	<0.000001	Benjamini-Yekutieli
23DAS	2.504	4.73	-2.225	0.3982	t-test	5.588	38	2e-06	6e-06	Benjamini-Yekutieli
30DAS	6.905	11.95	-5.047	0.7786	t-test	6.482	38	<0.000001	<0.000001	Benjamini-Yekutieli
37DAS	12.13	19.43	-7.294	1.326	t-test	5.502	34	4e-06	8e-06	Benjamini-Yekutieli
44DAS	18.23	21.42	-3.183	0.892	t-test	3.568	29	0.001273	0.001273	Benjamini-Yekutieli
Col-0 vs 35S::SLIM1 #39	Mean of Col-0	Mean of 35S::SLIM1 #39	Difference	SE of difference	test	t ratio	df	P value	Adjusted P Value	p-value adjustment method
16DAS	0.3215	1.071	-0.7498	0.06153	t-test	12.18	38	<0.000001	<0.000001	Benjamini-Yekutieli
23DAS	2.504	4.544	-2.039	0.5251	t-test	3.884	38	0.000398	0.000796	Benjamini-Yekutieli
30DAS	6.905	12.77	-5.863	1.028	t-test	5.703	38	1e-06	6e-06	Benjamini-Yekutieli
37DAS	12.13	19.87	-7.739	1.473	t-test	5.255	34	8e-06	2.4e-05	Benjamini-Yekutieli
44DAS	18.23	22.39	-4.159	1.101	t-test	3.778	29	0.000729	0.000796	Benjamini-Yekutieli
Col-0 vs EV	Mean of Col-0	Mean of EV	Difference	SE of difference	test	t ratio	df	P value	Adjusted P Value	p-value adjustment method
16DAS	0.3215	0.2309	0.09055	0.03026	t-test	2.993	38	0.004838	0.019211	Benjamini-Yekutieli
23DAS	2.504	1.064	1.441	0.3329	t-test	4.327	33	0.000132	0.000658	Benjamini-Yekutieli
30DAS	6.905	5.045	1.86	0.6162	t-test	3.018	33	0.004872	0.019211	Benjamini-Yekutieli
37DAS	12.13	10.92	1.208	1.619	t-test	0.7466	29	0.461332	0.709837	Benjamini-Yekutieli
44DAS	18.23	17.89	0.3401	0.8369	t-test	0.4064	27	0.687669	0.709837	Benjamini-Yekutieli

## Sheet: Figure 2b
Col-0 vs slim1-cr	Mean of Col-0	Mean of slim1-cr	Difference	SE of difference	test	t ratio	df	P value	Adjusted P Value	p-value adjustment method
30DAS	6.692	6.934	-0.242	0.1765	t-test	1.371	4	0.24214	0.67261	Holm-Sidak
37DAS	6.97	8.145	-1.175	0.6934	t-test	1.695	4	0.165288	0.67261	Holm-Sidak
44DAS	6.533	7.075	-0.5421	0.179	t-test	3.029	4	0.038821	0.323508	Holm-Sidak
51DAS	7.473	7.499	-0.02632	0.8064	t-test	0.03264	4	0.975523	>0.999999	Holm-Sidak
Col-0 vs EV	Mean of Col-0	Mean of EV	Difference	SE of difference	test	t ratio	df	P value	Adjusted P Value	p-value adjustment method
30DAS	6.692	6.993	-0.3005	0.2648	t-test	1.135	4	0.319875	>0.999999	Holm-Sidak
37DAS	6.97	6.447	0.5222	0.5289	t-test	0.9873	4	0.379398	>0.999999	Holm-Sidak
44DAS	6.533	7.127	-0.5939	0.3211	t-test	1.85	4	0.138029	>0.999999	Holm-Sidak
51DAS	7.473	7.53	-0.05746	1.188	t-test	0.04837	4	0.963742	>0.999999	Holm-Sidak
Col-0 vs 35S::SLIM1 #17	Mean of Col-0	Mean of 35S::SLIM1 #17	Difference	SE of difference	test	t ratio	df	P value	Adjusted P Value	p-value adjustment method
30DAS	6.692	8.424	-1.731	0.2886	t-test	6	4	0.003883	0.015443	Holm-Sidak
37DAS	6.97	8.35	-1.38	0.7716	t-test	1.789	4	0.148086	0.274243	Holm-Sidak
44DAS	6.533	7.309	-0.7761	0.4444	t-test	1.746	4	0.155675	0.274243	Holm-Sidak
51DAS	7.473	13.9	-6.423	1.51	t-test	4.255	4	0.013109	0.038814	Holm-Sidak
Col-0 vs 35S::SLIM1 #25	Mean of Col-0	Mean of 35S::SLIM1 #25	Difference	SE of difference	test	t ratio	df	P value	Adjusted P Value	p-value adjustment method
30DAS	6.692	7.253	-0.5604	0.2416	t-test	2.319	4	0.081225	0.224419	Holm-Sidak
37DAS	6.97	7.159	-0.1891	0.9988	t-test	0.1893	4	0.859058	0.859058	Holm-Sidak
44DAS	6.533	7.526	-0.9933	0.4473	t-test	2.221	4	0.090544	0.224419	Holm-Sidak
51DAS	7.473	13.9	-6.431	0.8061	t-test	7.979	4	0.001337	0.005339	Holm-Sidak
Col-0 vs 35S::SLIM1 #39	Mean of Col-0	Mean of 35S::SLIM1 #39	Difference	SE of difference	test	t ratio	df	P value	Adjusted P Value	p-value adjustment method
30DAS	6.692	9.409	-2.717	0.4538	t-test	5.987	4	0.003913	0.015559	Holm-Sidak
37DAS	6.97	8.693	-1.723	0.7663	t-test	2.249	4	0.087746	0.167793	Holm-Sidak
44DAS	6.533	9.116	-2.583	1.441	t-test	1.793	4	0.147381	0.167793	Holm-Sidak
51DAS	7.473	15.98	-8.508	1.985	t-test	4.286	4	0.012791	0.037884	Holm-Sidak

## Sheet: Figure 2c
30 DAS
Col-0 vs EV	Mean of Col-0	Mean of EV	Difference	SE of difference	test	t ratio	df	P value	Adjusted P Value	p-value adjustment method
K3-2-RhaGlc-7Rha	1668	1795	-126.8	372.4	t-test	0.3404	4	0.750691	>0.999999	Benjamini-Yekutieli
K3-HexGlc-7Rha	36.34	34.25	2.087	8.061	t-test	0.2589	4	0.808492	>0.999999	Benjamini-Yekutieli
Q3-2RhaGlc-7Rha	6.199	7.73	-1.531	1.723	t-test	0.8885	4	0.424466	>0.999999	Benjamini-Yekutieli
Rutin	66.64	63.41	3.227	16.77	t-test	0.1925	4	0.856753	>0.999999	Benjamini-Yekutieli
2.5-DHBA-5DXyl	710.4	831.5	-121.1	61.98	t-test	1.954	4	0.122427	>0.999999	Benjamini-Yekutieli
5-HFAGlc	181.1	199.7	-18.6	121.4	t-test	0.1532	4	0.885632	>0.999999	Benjamini-Yekutieli
K3-6RhaGlc-7Rha	361.4	278.1	83.3	80.79	t-test	1.031	4	0.360749	>0.999999	Benjamini-Yekutieli
K3Glc-7Rha	426.6	392.3	34.32	110.4	t-test	0.3109	4	0.771426	>0.999999	Benjamini-Yekutieli
K3Rha-7Rha	1244	1301	-56.64	275.6	t-test	0.2055	4	0.847205	>0.999999	Benjamini-Yekutieli
Que3-6RhaGlc-7Rha	9.439	7.704	1.735	2.111	t-test	0.8221	4	0.45722	>0.999999	Benjamini-Yekutieli
Que3Glc-7Rha	13.97	11.51	2.466	3.909	t-test	0.631	4	0.562317	>0.999999	Benjamini-Yekutieli
QA3Caffeoyl	11.72	13.85	-2.124	5.067	t-test	0.4192	4	0.696593	>0.999999	Benjamini-Yekutieli
30 DAS
Col-0 vs slim1-cr	Mean of Col-0	Mean of slim1-cr	Difference	SE of difference	test	t ratio	df	P value	Adjusted P Value	p-value adjustment method
K3-2-RhaGlc-7Rha	1668	2099	-431.7	601.1	t-test	0.7181	4	0.512379	>0.999999	Benjamini-Yekutieli
K3-HexGlc-7Rha	36.34	39.87	-3.525	10.44	t-test	0.3376	4	0.752616	>0.999999	Benjamini-Yekutieli
Q3-2RhaGlc-7Rha	6.199	8.793	-2.593	0.7002	t-test	3.704	4	0.020763	0.77317	Benjamini-Yekutieli
Rutin	66.64	75.69	-9.054	18.5	t-test	0.4894	4	0.650162	>0.999999	Benjamini-Yekutieli
2.5-DHBA-5DXyl	710.4	835.8	-125.4	106.2	t-test	1.181	4	0.303118	>0.999999	Benjamini-Yekutieli
5-HFAGlc	181.1	138.7	42.44	70.89	t-test	0.5986	4	0.581669	>0.999999	Benjamini-Yekutieli
K3-6RhaGlc-7Rha	361.4	446.3	-84.95	132.3	t-test	0.6419	4	0.555857	>0.999999	Benjamini-Yekutieli
K3Glc-7Rha	426.6	660.1	-233.4	186.7	t-test	1.25	4	0.279359	>0.999999	Benjamini-Yekutieli
K3Rha-7Rha	1244	1725	-480.9	470	t-test	1.023	4	0.364058	>0.999999	Benjamini-Yekutieli
Que3-6RhaGlc-7Rha	9.439	10.12	-0.6831	3.398	t-test	0.201	4	0.8505	>0.999999	Benjamini-Yekutieli
Que3Glc-7Rha	13.97	16.12	-2.149	5.153	t-test	0.417	4	0.698056	>0.999999	Benjamini-Yekutieli
QA3Caffeoyl	11.72	12.57	-0.846	6.007	t-test	0.1408	4	0.894811	>0.999999	Benjamini-Yekutieli
30 DAS
Col-0 vs 35S::SLIM1 #17	Mean of Col-0	Mean of 35S::SLIM1 #17	Difference	SE of difference	test	t ratio	df	P value	Adjusted P Value	p-value adjustment method
K3-2-RhaGlc-7Rha	1668	1709	41.02	372.3	t-test	0.1102	4	0.917575	>0.999999	Benjamini-Yekutieli
K3-HexGlc-7Rha	36.34	48.13	11.79	7.309	t-test	1.613	4	0.182004	>0.999999	Benjamini-Yekutieli
Q3-2RhaGlc-7Rha	6.199	9.253	3.054	0.8446	t-test	3.616	4	0.02244	0.417822	Benjamini-Yekutieli
Rutin	66.64	73.93	7.287	15.01	t-test	0.4854	4	0.6528	>0.999999	Benjamini-Yekutieli
2.5-DHBA-5DXyl	710.4	879.2	168.7	91.08	t-test	1.852	4	0.137607	>0.999999	Benjamini-Yekutieli
5-HFAGlc	181.1	824	642.9	155.6	t-test	4.133	4	0.014461	0.417822	Benjamini-Yekutieli
K3-6RhaGlc-7Rha	361.4	352.4	-8.95	78.53	t-test	0.114	4	0.914761	>0.999999	Benjamini-Yekutieli
K3Glc-7Rha	426.6	459.3	32.72	82.9	t-test	0.3947	4	0.713206	>0.999999	Benjamini-Yekutieli
K3Rha-7Rha	1244	1397	152.8	254	t-test	0.6018	4	0.579741	>0.999999	Benjamini-Yekutieli
Que3-6RhaGlc-7Rha	9.439	12.65	3.211	2.346	t-test	1.369	4	0.242854	>0.999999	Benjamini-Yekutieli
Que3Glc-7Rha	13.97	16.15	2.18	4.072	t-test	0.5353	4	0.620819	>0.999999	Benjamini-Yekutieli
QA3Caffeoyl	11.72	7.793	-3.93	3.573	t-test	1.1	4	0.333068	>0.999999	Benjamini-Yekutieli
30 DAS
Col-0 vs 35S::SLIM1 #25	Mean of Col-0	Mean of 35S::SLIM1 #25	Difference	SE of difference	test	t ratio	df	P value	Adjusted P Value	p-value adjustment method
K3-2-RhaGlc-7Rha	1668	1905	-237.6	368.9	t-test	0.6441	4	0.554571	>0.999999	Benjamini-Yekutieli
K3-HexGlc-7Rha	36.34	50.38	-14.04	8.525	t-test	1.647	4	0.174968	>0.999999	Benjamini-Yekutieli
Q3-2RhaGlc-7Rha	6.199	8.412	-2.213	0.872	t-test	2.537	4	0.064155	>0.999999	Benjamini-Yekutieli
Rutin	66.64	57.88	8.764	21.92	t-test	0.3998	4	0.709708	>0.999999	Benjamini-Yekutieli
2.5-DHBA-5DXyl	710.4	916.1	-205.7	65.73	t-test	3.13	4	0.035187	>0.999999	Benjamini-Yekutieli
5-HFAGlc	181.1	365.4	-184.3	204.2	t-test	0.9024	4	0.417876	>0.999999	Benjamini-Yekutieli
K3-6RhaGlc-7Rha	361.4	393	-31.62	79.42	t-test	0.3982	4	0.710832	>0.999999	Benjamini-Yekutieli
K3Glc-7Rha	426.6	487.1	-60.45	84.4	t-test	0.7163	4	0.513412	>0.999999	Benjamini-Yekutieli
K3Rha-7Rha	1244	1451	-206.7	242.9	t-test	0.8508	4	0.442802	>0.999999	Benjamini-Yekutieli
Que3-6RhaGlc-7Rha	9.439	14.43	-4.991	2.442	t-test	2.043	4	0.110511	>0.999999	Benjamini-Yekutieli
Que3Glc-7Rha	13.97	14.5	-0.528	3.969	t-test	0.1331	4	0.900573	>0.999999	Benjamini-Yekutieli
QA3Caffeoyl	11.72	16.58	-4.858	4.07	t-test	1.194	4	0.298593	>0.999999	Benjamini-Yekutieli
30 DAS
Col-0 vs 35S::SLIM1 #39	Mean of Col-0	Mean of 35S::SLIM1 #39	Difference	SE of difference	test	t ratio	df	P value	Adjusted P Value	p-value adjustment method
K3-2-RhaGlc-7Rha	1668	1658	10.01	358	t-test	0.02796	4	0.979037	>0.999999	Benjamini-Yekutieli
K3-HexGlc-7Rha	36.34	47.69	-11.35	6.06	t-test	1.873	4	0.134426	>0.999999	Benjamini-Yekutieli
Q3-2RhaGlc-7Rha	6.199	9.443	-3.244	0.7986	t-test	4.062	4	0.01532	0.570504	Benjamini-Yekutieli
Rutin	66.64	63.37	3.266	15.31	t-test	0.2133	4	0.841531	>0.999999	Benjamini-Yekutieli
2.5-DHBA-5DXyl	710.4	966	-255.6	100.2	t-test	2.551	4	0.063244	>0.999999	Benjamini-Yekutieli
5-HFAGlc	181.1	928.3	-747.2	366	t-test	2.042	4	0.110718	>0.999999	Benjamini-Yekutieli
K3-6RhaGlc-7Rha	361.4	339	22.4	74.11	t-test	0.3023	4	0.777491	>0.999999	Benjamini-Yekutieli
K3Glc-7Rha	426.6	400.6	26.04	76.59	t-test	0.34	4	0.750964	>0.999999	Benjamini-Yekutieli
K3Rha-7Rha	1244	1245	-0.4208	237.6	t-test	0.001771	4	0.998672	>0.999999	Benjamini-Yekutieli
Que3-6RhaGlc-7Rha	9.439	12.02	-2.578	1.864	t-test	1.383	4	0.23879	>0.999999	Benjamini-Yekutieli
Que3Glc-7Rha	13.97	12.93	1.047	3.554	t-test	0.2947	4	0.782919	>0.999999	Benjamini-Yekutieli
QA3Caffeoyl	11.72	4.87	6.852	3.509	t-test	1.953	4	0.122524	>0.999999	Benjamini-Yekutieli
37 DAS
Col-0 vs EV	Mean of Col-0	Mean of EV	Difference	SE of difference	test	t ratio	df	P value	Adjusted P Value	p-value adjustment method
K3-2-RhaGlc-7Rha	1997	1949	47.88	245.7	t-test	0.1949	4	0.854987	>0.999999	Benjamini-Yekutieli
K3-HexGlc-7Rha	45.43	41.01	4.414	4.94	t-test	0.8936	4	0.422061	>0.999999	Benjamini-Yekutieli
Q3-2RhaGlc-7Rha	5.933	6.145	-0.2123	1.409	t-test	0.1506	4	0.88755	>0.999999	Benjamini-Yekutieli
Rutin	80.48	75.72	4.758	17.46	t-test	0.2725	4	0.798706	>0.999999	Benjamini-Yekutieli
2.5-DHBA-5DXyl	918	849.1	68.91	92.06	t-test	0.7484	4	0.495798	>0.999999	Benjamini-Yekutieli
5-HFAGlc	187.4	193.8	-6.465	117.4	t-test	0.05506	4	0.958734	>0.999999	Benjamini-Yekutieli
K3-6RhaGlc-7Rha	408.9	401.6	7.304	42.99	t-test	0.1699	4	0.873319	>0.999999	Benjamini-Yekutieli
K3Glc-7Rha	509.8	493.8	16.05	74.71	t-test	0.2148	4	0.840416	>0.999999	Benjamini-Yekutieli
K3Rha-7Rha	1506	1496	9.815	165	t-test	0.0595	4	0.955407	>0.999999	Benjamini-Yekutieli
Que3-6RhaGlc-7Rha	11.28	9.599	1.676	1.212	t-test	1.383	4	0.238812	>0.999999	Benjamini-Yekutieli
Que3Glc-7Rha	16.26	17.41	-1.141	3.576	t-test	0.3192	4	0.765584	>0.999999	Benjamini-Yekutieli
QA3Caffeoyl	13.25	12.63	0.614	1.77	t-test	0.347	4	0.746087	>0.999999	Benjamini-Yekutieli
37 DAS
Col-0 vs slim1-cr	Mean of Col-0	Mean of slim1-cr	Difference	SE of difference	test	t ratio	df	P value	Adjusted P Value	p-value adjustment method
K3-2-RhaGlc-7Rha	1997	1993	4.229	336	t-test	0.01259	4	0.990561	>0.999999	Benjamini-Yekutieli
K3-HexGlc-7Rha	45.43	57.63	-12.2	7.301	t-test	1.671	4	0.170033	0.636553	Benjamini-Yekutieli
Q3-2RhaGlc-7Rha	5.933	9.774	-3.841	2.041	t-test	1.882	4	0.132913	0.636553	Benjamini-Yekutieli
Rutin	80.48	154.3	-73.81	54.68	t-test	1.35	4	0.248405	0.636553	Benjamini-Yekutieli
2.5-DHBA-5DXyl	918	992.2	-74.14	116.8	t-test	0.6346	4	0.560146	0.981639	Benjamini-Yekutieli
5-HFAGlc	187.4	146.3	41.06	121.6	t-test	0.3377	4	0.752591	>0.999999	Benjamini-Yekutieli
K3-6RhaGlc-7Rha	408.9	423	-14.07	66.73	t-test	0.2108	4	0.843366	>0.999999	Benjamini-Yekutieli
K3Glc-7Rha	509.8	518.4	-8.593	120.2	t-test	0.0715	4	0.946431	>0.999999	Benjamini-Yekutieli
K3Rha-7Rha	1506	1618	-111.5	209.8	t-test	0.5314	4	0.623263	0.981639	Benjamini-Yekutieli
Que3-6RhaGlc-7Rha	11.28	15.15	-3.873	1.827	t-test	2.12	4	0.101306	0.636553	Benjamini-Yekutieli
Que3Glc-7Rha	16.26	20.8	-4.54	7.369	t-test	0.6161	4	0.571181	0.981639	Benjamini-Yekutieli
QA3Caffeoyl	13.25	8.182	5.065	3.792	t-test	1.336	4	0.2526	0.636553	Benjamini-Yekutieli
37 DAS
Col-0 vs 35S::SLIM1 #17	Mean of Col-0	Mean of 35S::SLIM1 #17	Difference	SE of difference	test	t ratio	df	P value	Adjusted P Value	p-value adjustment method
K3-2-RhaGlc-7Rha	1997	2059	-61.94	333.3	t-test	0.1859	4	0.861605	0.986929	Benjamini-Yekutieli
K3-HexGlc-7Rha	45.43	63.79	-18.36	19.8	t-test	0.9274	4	0.406218	0.926047	Benjamini-Yekutieli
Q3-2RhaGlc-7Rha	5.933	11.08	-5.15	1.133	t-test	4.545	4	0.010459	0.09125	Benjamini-Yekutieli
Rutin	80.48	87.66	-7.18	35.05	t-test	0.2048	4	0.847695	0.986929	Benjamini-Yekutieli
2.5-DHBA-5DXyl	918	845.1	72.97	70.5	t-test	1.035	4	0.359127	0.926047	Benjamini-Yekutieli
5-HFAGlc	187.4	192.5	-5.131	208.9	t-test	0.02456	4	0.981583	>0.999999	Benjamini-Yekutieli
K3-6RhaGlc-7Rha	408.9	458.9	-49.98	105.9	t-test	0.4721	4	0.661462	0.926047	Benjamini-Yekutieli
K3Glc-7Rha	509.8	582.8	-72.97	111.3	t-test	0.6555	4	0.547947	0.926047	Benjamini-Yekutieli
K3Rha-7Rha	1506	1673	-166.7	298	t-test	0.5594	4	0.605721	0.926047	Benjamini-Yekutieli
Que3-6RhaGlc-7Rha	11.28	19.09	-7.813	6.046	t-test	1.292	4	0.265864	0.926047	Benjamini-Yekutieli
Que3Glc-7Rha	16.26	21.48	-5.212	7.447	t-test	0.6999	4	0.522551	0.926047	Benjamini-Yekutieli
QA3Caffeoyl	13.25	6.678	6.569	1.59	t-test	4.131	4	0.014484	0.09125	Benjamini-Yekutieli
37 DAS
Col-0 vs 35S::SLIM1 #25	Mean of Col-0	Mean of 35S::SLIM1 #25	Difference	SE of difference	test	t ratio	df	P value	Adjusted P Value	p-value adjustment method
K3-2-RhaGlc-7Rha	1997	1942	54.92	215.5	t-test	0.2549	4	0.811389	>0.999999	Benjamini-Yekutieli
K3-HexGlc-7Rha	45.43	67.12	-21.69	14.16	t-test	1.532	4	0.200331	0.900146	Benjamini-Yekutieli
Q3-2RhaGlc-7Rha	5.933	7.098	-1.165	0.9404	t-test	1.239	4	0.283065	0.900146	Benjamini-Yekutieli
Rutin	80.48	84.58	-4.101	32.38	t-test	0.1267	4	0.905328	>0.999999	Benjamini-Yekutieli
2.5-DHBA-5DXyl	918	814.8	103.2	81.17	t-test	1.272	4	0.272438	0.900146	Benjamini-Yekutieli
5-HFAGlc	187.4	260.3	-72.95	177.9	t-test	0.41	4	0.702813	>0.999999	Benjamini-Yekutieli
K3-6RhaGlc-7Rha	408.9	408	0.9076	47.43	t-test	0.01914	4	0.985649	>0.999999	Benjamini-Yekutieli
K3Glc-7Rha	509.8	480	29.84	61.27	t-test	0.487	4	0.651719	>0.999999	Benjamini-Yekutieli
K3Rha-7Rha	1506	1465	41	162.6	t-test	0.2521	4	0.813389	>0.999999	Benjamini-Yekutieli
Que3-6RhaGlc-7Rha	11.28	17.51	-6.232	3.427	t-test	1.819	4	0.143122	0.900146	Benjamini-Yekutieli
Que3Glc-7Rha	16.26	18.89	-2.625	6.535	t-test	0.4017	4	0.70847	>0.999999	Benjamini-Yekutieli
QA3Caffeoyl	13.25	15.83	-2.579	2.589	t-test	0.9961	4	0.375592	0.955505	Benjamini-Yekutieli
37 DAS
Col-0 vs 35S::SLIM1 #39	Mean of Col-0	Mean of 35S::SLIM1 #39	Difference	SE of difference	test	t ratio	df	P value	Adjusted P Value	p-value adjustment method
K3-2-RhaGlc-7Rha	1997	1844	153.2	379.5	t-test	0.4037	4	0.707087	0.928311	Benjamini-Yekutieli
K3-HexGlc-7Rha	45.43	53.85	-8.426	19.07	t-test	0.442	4	0.681367	0.928311	Benjamini-Yekutieli
Q3-2RhaGlc-7Rha	5.933	5.989	-0.05675	2.201	t-test	0.02578	4	0.980665	>0.999999	Benjamini-Yekutieli
Rutin	80.48	55.57	24.9	45.26	t-test	0.5502	4	0.611475	0.928311	Benjamini-Yekutieli
2.5-DHBA-5DXyl	918	957.7	-39.64	131.5	t-test	0.3014	4	0.778135	0.928311	Benjamini-Yekutieli
5-HFAGlc	187.4	259.2	-71.89	280.6	t-test	0.2562	4	0.81043	0.928311	Benjamini-Yekutieli
K3-6RhaGlc-7Rha	408.9	366.7	42.25	71.68	t-test	0.5894	4	0.587284	0.928311	Benjamini-Yekutieli
K3Glc-7Rha	509.8	415.2	94.6	108.2	t-test	0.8745	4	0.431213	0.928311	Benjamini-Yekutieli
K3Rha-7Rha	1506	1328	178.2	241.6	t-test	0.7377	4	0.501621	0.928311	Benjamini-Yekutieli
Que3-6RhaGlc-7Rha	11.28	17.17	-5.891	5.392	t-test	1.093	4	0.335994	0.928311	Benjamini-Yekutieli
Que3Glc-7Rha	16.26	20.11	-3.849	9.144	t-test	0.4209	4	0.695438	0.928311	Benjamini-Yekutieli
QA3Caffeoyl	13.25	7.122	6.125	1.421	t-test	4.31	4	0.012543	0.158037	Benjamini-Yekutieli
44 DAS
Col-0 vs EV	Mean of Col-0	Mean of EV	Difference	SE of difference	test	t ratio	df	P value	Adjusted P Value	p-value adjustment method
K3-2-RhaGlc-7Rha	1208	1258	-49.33	160.3	t-test	0.3078	4	0.773583	0.924089	Benjamini-Yekutieli
K3-HexGlc-7Rha	33.93	44.98	-11.04	14.25	t-test	0.7751	4	0.48155	0.678113	Benjamini-Yekutieli
Q3-2RhaGlc-7Rha	5.313	6.725	-1.412	1.371	t-test	1.03	4	0.361122	0.678113	Benjamini-Yekutieli
Rutin	41.62	52.21	-10.59	13.76	t-test	0.7698	4	0.484367	0.678113	Benjamini-Yekutieli
2.5-DHBA-5DXyl	897.3	799	98.25	112.3	t-test	0.8746	4	0.431173	0.678113	Benjamini-Yekutieli
5-HFAGlc	15.92	15.08	0.8436	4.631	t-test	0.1822	4	0.864307	0.924089	Benjamini-Yekutieli
K3-6RhaGlc-7Rha	251.9	279.3	-27.38	14.81	t-test	1.849	4	0.138159	0.678113	Benjamini-Yekutieli
K3Glc-7Rha	275.7	257.5	18.13	20.47	t-test	0.8853	4	0.426027	0.678113	Benjamini-Yekutieli
K3Rha-7Rha	945.3	928.2	17.1	19.69	t-test	0.8688	4	0.433967	0.678113	Benjamini-Yekutieli
Que3-6RhaGlc-7Rha	8.106	10.49	-2.381	1.982	t-test	1.201	4	0.29591	0.678113	Benjamini-Yekutieli
Que3Glc-7Rha	8.054	8.423	-0.369	2.295	t-test	0.1607	4	0.880085	0.924089	Benjamini-Yekutieli
QA3Caffeoyl	8.524	6.731	1.793	1.195	t-test	1.5	4	0.207946	0.678113	Benjamini-Yekutieli
44 DAS
Col-0 vs slim1-cr	Mean of Col-0	Mean of slim1-cr	Difference	SE of difference	test	t ratio	df	P value	Adjusted P Value	p-value adjustment method
K3-2-RhaGlc-7Rha	1208	1280	-71.65	262.8	t-test	0.2726	4	0.798649	0.838582	Benjamini-Yekutieli
K3-HexGlc-7Rha	33.93	41.4	-7.467	16.43	t-test	0.4545	4	0.673063	0.795116	Benjamini-Yekutieli
Q3-2RhaGlc-7Rha	5.313	6.17	-0.8566	1.046	t-test	0.8189	4	0.458806	0.795116	Benjamini-Yekutieli
Rutin	41.62	47.85	-6.228	14.73	t-test	0.4228	4	0.694149	0.795116	Benjamini-Yekutieli
2.5-DHBA-5DXyl	897.3	732.7	164.5	88.28	t-test	1.864	4	0.135787	0.795116	Benjamini-Yekutieli
5-HFAGlc	15.92	18.52	-2.6	4.941	t-test	0.5263	4	0.626532	0.795116	Benjamini-Yekutieli
K3-6RhaGlc-7Rha	251.9	295	-43.13	67.96	t-test	0.6346	4	0.560152	0.795116	Benjamini-Yekutieli
K3Glc-7Rha	275.7	316.1	-40.48	60.52	t-test	0.6689	4	0.540197	0.795116	Benjamini-Yekutieli
K3Rha-7Rha	945.3	1157	-212	247.5	t-test	0.8564	4	0.440072	0.795116	Benjamini-Yekutieli
Que3-6RhaGlc-7Rha	8.106	10.88	-2.772	5.007	t-test	0.5536	4	0.609309	0.795116	Benjamini-Yekutieli
Que3Glc-7Rha	8.054	10.48	-2.429	3.423	t-test	0.7094	4	0.517216	0.795116	Benjamini-Yekutieli
QA3Caffeoyl	8.524	5.547	2.977	1.716	t-test	1.735	4	0.157749	0.795116	Benjamini-Yekutieli
44 DAS
Col-0 vs 35S::SLIM1 #17	Mean of Col-0	Mean of 35S::SLIM1 #17	Difference	SE of difference	test	t ratio	df	P value	Adjusted P Value	p-value adjustment method
K3-2-RhaGlc-7Rha	1208	2127	-919.1	198.7	t-test	4.626	4	0.009834	0.069748	Benjamini-Yekutieli
K3-HexGlc-7Rha	33.93	133.6	-99.7	28.9	t-test	3.45	4	0.026045	0.069748	Benjamini-Yekutieli
Q3-2RhaGlc-7Rha	5.313	18.41	-13.09	3.265	t-test	4.011	4	0.01599	0.069748	Benjamini-Yekutieli
Rutin	41.62	206.4	-164.8	91.76	t-test	1.796	4	0.146998	0.183591	Benjamini-Yekutieli
2.5-DHBA-5DXyl	897.3	951	-53.72	75.53	t-test	0.7113	4	0.516204	0.516204	Benjamini-Yekutieli
5-HFAGlc	15.92	65.12	-49.2	33.68	t-test	1.461	4	0.217873	0.23768	Benjamini-Yekutieli
K3-6RhaGlc-7Rha	251.9	448	-196.1	53.48	t-test	3.666	4	0.021463	0.069748	Benjamini-Yekutieli
K3Glc-7Rha	275.7	504.5	-228.9	70.71	t-test	3.237	4	0.031775	0.069748	Benjamini-Yekutieli
K3Rha-7Rha	945.3	1634	-688.6	231	t-test	2.981	4	0.040686	0.069748	Benjamini-Yekutieli
Que3-6RhaGlc-7Rha	8.106	34.57	-26.46	8.771	t-test	3.017	4	0.03928	0.069748	Benjamini-Yekutieli
Que3Glc-7Rha	8.054	43.29	-35.24	20.01	t-test	1.761	4	0.152993	0.183591	Benjamini-Yekutieli
QA3Caffeoyl	8.524	5.411	3.113	1.689	t-test	1.842	4	0.139204	0.183591	Benjamini-Yekutieli
44 DAS
Col-0 vs 35S::SLIM1 #25	Mean of Col-0	Mean of 35S::SLIM1 #25	Difference	SE of difference	test	t ratio	df	P value	Adjusted P Value	p-value adjustment method
K3-2-RhaGlc-7Rha	1208	1877	-668.4	166.7	t-test	4.009	4	0.016011	0.023536	Benjamini-Yekutieli
K3-HexGlc-7Rha	33.93	106.5	-72.55	10.65	t-test	6.81	4	0.00243	0.008929	Benjamini-Yekutieli
Q3-2RhaGlc-7Rha	5.313	12.76	-7.451	3.292	t-test	2.263	4	0.086377	0.08694	Benjamini-Yekutieli
Rutin	41.62	84.8	-43.18	34.17	t-test	1.264	4	0.27494	0.202081	Benjamini-Yekutieli
2.5-DHBA-5DXyl	897.3	1093	-195.3	114.8	t-test	1.701	4	0.164073	0.133993	Benjamini-Yekutieli
5-HFAGlc	15.92	29.22	-13.29	15.31	t-test	0.8682	4	0.434248	0.265977	Benjamini-Yekutieli
K3-6RhaGlc-7Rha	251.9	390.6	-138.7	32.04	t-test	4.328	4	0.012371	0.022731	Benjamini-Yekutieli
K3Glc-7Rha	275.7	399.1	-123.4	38.32	t-test	3.221	4	0.032263	0.039523	Benjamini-Yekutieli
K3Rha-7Rha	945.3	1335	-389.3	87.91	t-test	4.429	4	0.011431	0.022731	Benjamini-Yekutieli
Que3-6RhaGlc-7Rha	8.106	24.56	-16.46	1.877	t-test	8.768	4	0.000933	0.006857	Benjamini-Yekutieli
Que3Glc-7Rha	8.054	16.52	-8.463	7.198	t-test	1.176	4	0.304944	0.203758	Benjamini-Yekutieli
QA3Caffeoyl	8.524	10.44	-1.916	0.8786	t-test	2.181	4	0.094629	0.08694	Benjamini-Yekutieli
44 DAS
Col-0 vs 35S::SLIM1 #39	Mean of Col-0	Mean of 35S::SLIM1 #39	Difference	SE of difference	test	t ratio	df	P value	Adjusted P Value	p-value adjustment method
K3-2-RhaGlc-7Rha	1208	1981	-772.4	642	t-test	1.203	4	0.295284	0.391845	Benjamini-Yekutieli
K3-HexGlc-7Rha	33.93	175.1	-141.2	93.07	t-test	1.517	4	0.203855	0.391845	Benjamini-Yekutieli
Q3-2RhaGlc-7Rha	5.313	14.61	-9.299	7.546	t-test	1.232	4	0.285344	0.391845	Benjamini-Yekutieli
Rutin	41.62	225.6	-184	156.2	t-test	1.178	4	0.304133	0.391845	Benjamini-Yekutieli
2.5-DHBA-5DXyl	897.3	1134	-236.7	157.5	t-test	1.503	4	0.207255	0.391845	Benjamini-Yekutieli
5-HFAGlc	15.92	155.6	-139.6	60.83	t-test	2.296	4	0.083342	0.391845	Benjamini-Yekutieli
K3-6RhaGlc-7Rha	251.9	424.7	-172.8	171	t-test	1.011	4	0.369411	0.391845	Benjamini-Yekutieli
K3Glc-7Rha	275.7	494.8	-219.1	228.5	t-test	0.959	4	0.391845	0.391845	Benjamini-Yekutieli
K3Rha-7Rha	945.3	1439	-493.4	504	t-test	0.979	4	0.383012	0.391845	Benjamini-Yekutieli
Que3-6RhaGlc-7Rha	8.106	46.57	-38.46	28.4	t-test	1.354	4	0.247162	0.391845	Benjamini-Yekutieli
Que3Glc-7Rha	8.054	56.53	-48.48	43.59	t-test	1.112	4	0.328414	0.391845	Benjamini-Yekutieli
QA3Caffeoyl	8.524	6.239	2.285	0.95	t-test	2.405	4	0.073934	0.391845	Benjamini-Yekutieli
51 DAS
Col-0 vs EV	Mean of Col-0	Mean of EV	Difference	SE of difference	test	t ratio	df	P value	Adjusted P Value	p-value adjustment method
K3-2-RhaGlc-7Rha	1922	1852	70.88	515.4	t-test	0.1375	4	0.89727	>0.999999	Benjamini-Yekutieli
K3-HexGlc-7Rha	63.88	58.74	5.145	17.71	t-test	0.2905	4	0.785864	>0.999999	Benjamini-Yekutieli
Q3-2RhaGlc-7Rha	4.213	6.579	-2.366	0.9799	t-test	2.415	4	0.073187	0.681342	Benjamini-Yekutieli
Rutin	44.24	68.97	-24.73	5.052	t-test	4.895	4	0.008074	0.30067	Benjamini-Yekutieli
2.5-DHBA-5DXyl	688.9	658.4	30.56	61	t-test	0.5011	4	0.642652	>0.999999	Benjamini-Yekutieli
5-HFAGlc	4.796	22.04	-17.24	5.875	t-test	2.935	4	0.042618	0.529011	Benjamini-Yekutieli
K3-6RhaGlc-7Rha	402.5	423.2	-20.68	80.78	t-test	0.256	4	0.810573	>0.999999	Benjamini-Yekutieli
K3Glc-7Rha	366.9	381.1	-14.17	96.09	t-test	0.1475	4	0.889872	>0.999999	Benjamini-Yekutieli
K3Rha-7Rha	1433	1257	175.7	289	t-test	0.6079	4	0.576051	>0.999999	Benjamini-Yekutieli
Que3-6RhaGlc-7Rha	20.61	38.07	-17.46	5.772	t-test	3.024	4	0.038992	0.529011	Benjamini-Yekutieli
Que3Glc-7Rha	14.02	12.99	1.036	3.522	t-test	0.2941	4	0.783314	>0.999999	Benjamini-Yekutieli
QA3Caffeoyl	6.918	5.597	1.322	1.574	t-test	0.8393	4	0.448511	>0.999999	Benjamini-Yekutieli
51 DAS
Col-0 vs slim1-cr	Mean of Col-0	Mean of slim1-cr	Difference	SE of difference	test	t ratio	df	P value	Adjusted P Value	p-value adjustment method
K3-2-RhaGlc-7Rha	1922	2102	-179.9	598.8	t-test	0.3004	4	0.778817	0.994906	Benjamini-Yekutieli
K3-HexGlc-7Rha	63.88	62.16	1.721	20.97	t-test	0.08205	4	0.938546	0.994906	Benjamini-Yekutieli
Q3-2RhaGlc-7Rha	4.213	6.57	-2.357	1.363	t-test	1.729	4	0.158862	0.777202	Benjamini-Yekutieli
Rutin	44.24	76.42	-32.18	9.865	t-test	3.262	4	0.031029	0.390966	Benjamini-Yekutieli
2.5-DHBA-5DXyl	688.9	695	-6.116	87.34	t-test	0.07003	4	0.94753	0.994906	Benjamini-Yekutieli
5-HFAGlc	4.796	47.26	-42.47	26.56	t-test	1.599	4	0.185048	0.777202	Benjamini-Yekutieli
K3-6RhaGlc-7Rha	402.5	431.9	-29.4	121	t-test	0.2429	4	0.820004	0.994906	Benjamini-Yekutieli
K3Glc-7Rha	366.9	445.3	-78.36	131.3	t-test	0.5966	4	0.582882	0.994906	Benjamini-Yekutieli
K3Rha-7Rha	1433	1603	-170.2	424.8	t-test	0.4006	4	0.709217	0.994906	Benjamini-Yekutieli
Que3-6RhaGlc-7Rha	20.61	15.56	5.045	6.482	t-test	0.7783	4	0.47986	0.994906	Benjamini-Yekutieli
Que3Glc-7Rha	14.02	18.04	-4.019	3.518	t-test	1.142	4	0.31705	0.798966	Benjamini-Yekutieli
QA3Caffeoyl	6.918	4.712	2.206	1.923	t-test	1.147	4	0.31525	0.798966	Benjamini-Yekutieli
51 DAS
Col-0 vs 35S::SLIM1 #17	Mean of Col-0	Mean of 35S::SLIM1 #17	Difference	SE of difference	test	t ratio	df	P value	Adjusted P Value	p-value adjustment method
K3-2-RhaGlc-7Rha	1922	3111	-1189	663.7	t-test	1.791	4	0.147803	0.096996	Benjamini-Yekutieli
K3-HexGlc-7Rha	63.88	583.3	-519.5	32.25	t-test	16.11	4	8.7e-05	0.000456	Benjamini-Yekutieli
Q3-2RhaGlc-7Rha	4.213	32.55	-28.34	5.306	t-test	5.341	4	0.005923	0.008052	Benjamini-Yekutieli
Rutin	44.24	688	-643.7	129.6	t-test	4.967	4	0.007669	0.008052	Benjamini-Yekutieli
2.5-DHBA-5DXyl	688.9	1109	-420	106.1	t-test	3.957	4	0.016717	0.013846	Benjamini-Yekutieli
5-HFAGlc	4.796	146.2	-141.4	24.86	t-test	5.689	4	0.004715	0.008052	Benjamini-Yekutieli
K3-6RhaGlc-7Rha	402.5	678.7	-276.2	172.3	t-test	1.603	4	0.18412	0.107403	Benjamini-Yekutieli
K3Glc-7Rha	366.9	637.2	-270.2	204.1	t-test	1.324	4	0.256119	0.122239	Benjamini-Yekutieli
K3Rha-7Rha	1433	2237	-803.8	575.6	t-test	1.396	4	0.235085	0.122239	Benjamini-Yekutieli
Que3-6RhaGlc-7Rha	20.61	136.9	-116.3	22.67	t-test	5.13	4	0.00684	0.008052	Benjamini-Yekutieli
Que3Glc-7Rha	14.02	152.3	-138.3	36.02	t-test	3.84	4	0.018462	0.013846	Benjamini-Yekutieli
QA3Caffeoyl	6.918	7.811	-0.8931	3.22	t-test	0.2774	4	0.795236	0.347916	Benjamini-Yekutieli
51 DAS
Col-0 vs 35S::SLIM1 #25	Mean of Col-0	Mean of 35S::SLIM1 #25	Difference	SE of difference	test	t ratio	df	P value	Adjusted P Value	p-value adjustment method
K3-2-RhaGlc-7Rha	1922	3595	-1672	564.2	t-test	2.964	4	0.041389	0.024144	Benjamini-Yekutieli
K3-HexGlc-7Rha	63.88	324.7	-260.8	102.4	t-test	2.547	4	0.06352	0.033348	Benjamini-Yekutieli
Q3-2RhaGlc-7Rha	4.213	18.2	-13.99	3.787	t-test	3.694	4	0.020951	0.017871	Benjamini-Yekutieli
Rutin	44.24	202.8	-158.6	137.6	t-test	1.152	4	0.313334	0.137084	Benjamini-Yekutieli
2.5-DHBA-5DXyl	688.9	1302	-613.1	169.1	t-test	3.624	4	0.022269	0.017871	Benjamini-Yekutieli
5-HFAGlc	4.796	121.1	-116.3	12.45	t-test	9.339	4	0.000732	0.003842	Benjamini-Yekutieli
K3-6RhaGlc-7Rha	402.5	770.5	-368	96	t-test	3.833	4	0.018572	0.017871	Benjamini-Yekutieli
K3Glc-7Rha	366.9	803.5	-436.5	115.8	t-test	3.768	4	0.019633	0.017871	Benjamini-Yekutieli
K3Rha-7Rha	1433	2443	-1010	284.7	t-test	3.549	4	0.023828	0.017871	Benjamini-Yekutieli
Que3-6RhaGlc-7Rha	20.61	95.25	-74.64	19.8	t-test	3.77	4	0.019603	0.017871	Benjamini-Yekutieli
Que3Glc-7Rha	14.02	56.9	-42.87	24.93	t-test	1.719	4	0.160666	0.076681	Benjamini-Yekutieli
QA3Caffeoyl	6.918	15.94	-9.017	2.908	t-test	3.101	4	0.036202	0.023757	Benjamini-Yekutieli
51 DAS
Col-0 vs 35S::SLIM1 #39	Mean of Col-0	Mean of 35S::SLIM1 #39	Difference	SE of difference	test	t ratio	df	P value	Adjusted P Value	p-value adjustment method
K3-2-RhaGlc-7Rha	1922	4038	-2115	599.6	t-test	3.528	4	0.024281	0.016323	Benjamini-Yekutieli
K3-HexGlc-7Rha	63.88	893.7	-829.8	211.7	t-test	3.92	4	0.017243	0.016323	Benjamini-Yekutieli
Q3-2RhaGlc-7Rha	4.213	31.13	-26.92	4.452	t-test	6.046	4	0.003775	0.015855	Benjamini-Yekutieli
Rutin	44.24	1309	-1265	293.3	t-test	4.313	4	0.012518	0.016323	Benjamini-Yekutieli
2.5-DHBA-5DXyl	688.9	1066	-377.5	143.6	t-test	2.629	4	0.05824	0.022575	Benjamini-Yekutieli
5-HFAGlc	4.796	305.3	-300.5	90.94	t-test	3.304	4	0.029818	0.016323	Benjamini-Yekutieli
K3-6RhaGlc-7Rha	402.5	885.4	-482.9	148.1	t-test	3.26	4	0.031091	0.016323	Benjamini-Yekutieli
K3Glc-7Rha	366.9	829.4	-462.4	155.9	t-test	2.967	4	0.041272	0.01926	Benjamini-Yekutieli
K3Rha-7Rha	1433	2479	-1046	400.1	t-test	2.615	4	0.059125	0.022575	Benjamini-Yekutieli
Que3-6RhaGlc-7Rha	20.61	213.4	-192.8	56.1	t-test	3.437	4	0.026363	0.016323	Benjamini-Yekutieli
Que3Glc-7Rha	14.02	302.2	-288.1	73.45	t-test	3.923	4	0.017202	0.016323	Benjamini-Yekutieli
QA3Caffeoyl	6.918	10.83	-3.914	3.987	t-test	0.9817	4	0.381847	0.133647	Benjamini-Yekutieli

## Sheet: Figure 2d
timepoint	geneID	baseMean	model	test	contrast	stat	pvalue	padjMethod	padj	lfcModeration	log2FoldChange	lfcSE
DAS30	AT1G56650	140.491	~genotype	Wald	EV v Col-0	-2.09687	0.0360055	IHW	0.562434	ashr	-0.0368574	0.0880346
DAS30	AT1G66390	23.4503	~genotype	Wald	EV v Col-0	-3.09503	0.00196793	IHW	1	ashr	-0.0256888	0.133378
DAS30	AT2G26670	4605.83	~genotype	Wald	EV v Col-0	-1.19592	0.231728	IHW	0.746879	ashr	-0.0346498	0.0653206
DAS30	AT2G40890	2452.77	~genotype	Wald	EV v Col-0	0.67012	0.502781	IHW	0.919669	ashr	0.0211232	0.0595792
DAS30	AT3G16857	1929.96	~genotype	Wald	EV v Col-0	1.12671	0.259867	IHW	0.770186	ashr	0.0325129	0.0650482
DAS30	AT3G55120	549.845	~genotype	Wald	EV v Col-0	-1.46054	0.144141	IHW	0.716562	ashr	-0.0349242	0.0736979
DAS30	AT4G00040	1123.31	~genotype	Wald	EV v Col-0	0.207747	0.835426	IHW	1	ashr	0.00612547	0.0617621
DAS30	AT4G09820	58.3923	~genotype	Wald	EV v Col-0	-1.7712	0.076528	IHW	0.940311	ashr	-0.0273264	0.0824386
DAS30	AT4G22880	581.507	~genotype	Wald	EV v Col-0	-2.3914	0.0167842	IHW	0.379124	ashr	-0.0294736	0.08951
DAS30	AT4G25640	4600.11	~genotype	Wald	EV v Col-0	-1.31349	0.189019	IHW	0.703348	ashr	-0.0445836	0.0560532
DAS30	AT4G34135	537.693	~genotype	Wald	EV v Col-0	-1.06938	0.284899	IHW	0.926909	ashr	-0.0186715	0.0748869
DAS30	AT5G07990	251.607	~genotype	Wald	EV v Col-0	-2.55502	0.0106183	IHW	0.529298	ashr	-0.0468759	0.0997314
DAS30	AT5G13930	4403.29	~genotype	Wald	EV v Col-0	-2.40544	0.0161528	IHW	0.328372	ashr	-0.0529002	0.0975948
DAS30	AT5G24530	7740.52	~genotype	Wald	EV v Col-0	0.726917	0.467277	IHW	0.884075	ashr	0.0111105	0.0743653
DAS30	AT5G42800	897.978	~genotype	Wald	EV v Col-0	-2.59633	0.00942244	IHW	0.264424	ashr	-0.0342552	0.0942358
DAS30	AT5G54060	215.685	~genotype	Wald	EV v Col-0	-3.06211	0.00219782	IHW	0.308156	ashr	-0.0430732	0.109821
DAS30	AT1G56650	140.491	~genotype	Wald	slim1-cr v Col-0	2.11682	0.0342752	IHW	0.20483	ashr	0.165339	0.174212
DAS30	AT1G66390	23.4503	~genotype	Wald	slim1-cr v Col-0	-1.10945	0.267234	IHW	1	ashr	-0.0429444	0.187438
DAS30	AT2G26670	4605.83	~genotype	Wald	slim1-cr v Col-0	-0.132635	0.894482	IHW	0.910354	ashr	-0.0112388	0.108928
DAS30	AT2G40890	2452.77	~genotype	Wald	slim1-cr v Col-0	-1.00793	0.313488	IHW	0.449469	ashr	-0.0795157	0.0939748
DAS30	AT3G16857	1929.96	~genotype	Wald	slim1-cr v Col-0	-0.992127	0.321135	IHW	0.487611	ashr	-0.0843066	0.109552
DAS30	AT3G55120	549.845	~genotype	Wald	slim1-cr v Col-0	-0.466521	0.640843	IHW	0.775888	ashr	-0.0402706	0.13228
DAS30	AT4G00040	1123.31	~genotype	Wald	slim1-cr v Col-0	-0.313523	0.753883	IHW	0.904237	ashr	-0.0260412	0.103714
DAS30	AT4G09820	58.3923	~genotype	Wald	slim1-cr v Col-0	1.18978	0.234135	IHW	1	ashr	0.0842398	0.163291
DAS30	AT4G22880	581.507	~genotype	Wald	slim1-cr v Col-0	0.844447	0.39842	IHW	0.639182	ashr	0.047853	0.172088
DAS30	AT4G25640	4600.11	~genotype	Wald	slim1-cr v Col-0	-0.01238	0.990122	IHW	0.887294	ashr	-0.000873826	0.0795318
DAS30	AT4G34135	537.693	~genotype	Wald	slim1-cr v Col-0	2.85332	0.00432656	IHW	0.0458887	ashr	0.253158	0.206797
DAS30	AT5G07990	251.607	~genotype	Wald	slim1-cr v Col-0	-0.716209	0.473862	IHW	0.92389	ashr	-0.0511684	0.159237
DAS30	AT5G13930	4403.29	~genotype	Wald	slim1-cr v Col-0	-0.0465892	0.962841	IHW	0.776944	ashr	-0.00369407	0.148657
DAS30	AT5G24530	7740.52	~genotype	Wald	slim1-cr v Col-0	-1.86733	0.0618555	IHW	0.190789	ashr	-0.13838	0.17206
DAS30	AT5G42800	897.978	~genotype	Wald	slim1-cr v Col-0	0.881002	0.378317	IHW	0.639253	ashr	0.0514018	0.17119
DAS30	AT5G54060	215.685	~genotype	Wald	slim1-cr v Col-0	0.84888	0.395948	IHW	0.800941	ashr	0.0492866	0.171132
DAS30	AT1G56650	140.491	~genotype	Wald	35S::SLIM1 #17 v Col-0	4.5237	6.07691e-06	IHW	0.00026309	ashr	1.17329	0.351069
DAS30	AT1G66390	23.4503	~genotype	Wald	35S::SLIM1 #17 v Col-0	-1.57738	0.114709	IHW	1	ashr	-0.0978424	0.283862
DAS30	AT2G26670	4605.83	~genotype	Wald	35S::SLIM1 #17 v Col-0	-0.298177	0.765568	IHW	0.89085	ashr	-0.0172451	0.0906959
DAS30	AT2G40890	2452.77	~genotype	Wald	35S::SLIM1 #17 v Col-0	-2.53159	0.0113547	IHW	0.069066	ashr	-0.190173	0.107472
DAS30	AT3G16857	1929.96	~genotype	Wald	35S::SLIM1 #17 v Col-0	-1.30544	0.191743	IHW	0.414805	ashr	-0.0858948	0.107194
DAS30	AT3G55120	549.845	~genotype	Wald	35S::SLIM1 #17 v Col-0	1.35426	0.175654	IHW	0.373147	ashr	0.0968588	0.1358
DAS30	AT4G00040	1123.31	~genotype	Wald	35S::SLIM1 #17 v Col-0	0.727483	0.46693	IHW	0.717449	ashr	0.0424369	0.0906848
DAS30	AT4G09820	58.3923	~genotype	Wald	35S::SLIM1 #17 v Col-0	1.48908	0.136467	IHW	0.422893	ashr	0.111943	0.200756
DAS30	AT4G22880	581.507	~genotype	Wald	35S::SLIM1 #17 v Col-0	1.48682	0.137062	IHW	0.346712	ashr	0.107362	0.236559
DAS30	AT4G25640	4600.11	~genotype	Wald	35S::SLIM1 #17 v Col-0	-0.210696	0.833125	IHW	0.912862	ashr	-0.00961644	0.0642813
DAS30	AT4G34135	537.693	~genotype	Wald	35S::SLIM1 #17 v Col-0	-0.35538	0.722305	IHW	0.827874	ashr	-0.0221777	0.139196
DAS30	AT5G07990	251.607	~genotype	Wald	35S::SLIM1 #17 v Col-0	0.597615	0.550097	IHW	0.790062	ashr	0.0374961	0.152996
DAS30	AT5G13930	4403.29	~genotype	Wald	35S::SLIM1 #17 v Col-0	1.99018	0.0465706	IHW	0.190218	ashr	0.177451	0.210586
DAS30	AT5G24530	7740.52	~genotype	Wald	35S::SLIM1 #17 v Col-0	-2.63481	0.00841842	IHW	0.0736278	ashr	-0.343703	0.347877
DAS30	AT5G42800	897.978	~genotype	Wald	35S::SLIM1 #17 v Col-0	2.081	0.0374336	IHW	0.179546	ashr	0.197026	0.314823
DAS30	AT5G54060	215.685	~genotype	Wald	35S::SLIM1 #17 v Col-0	2.743	0.00608808	IHW	0.0513453	ashr	0.396814	0.45866
DAS30	AT1G56650	140.491	~genotype	Wald	35S::SLIM1 #25 v Col-0	1.8398	0.0657974	IHW	0.228133	ashr	0.155191	0.207704
DAS30	AT1G66390	23.4503	~genotype	Wald	35S::SLIM1 #25 v Col-0	-2.31452	0.020639	IHW	0.743181	ashr	-0.185991	0.427366
DAS30	AT2G26670	4605.83	~genotype	Wald	35S::SLIM1 #25 v Col-0	0.745297	0.456092	IHW	0.648182	ashr	0.0524693	0.100631
DAS30	AT2G40890	2452.77	~genotype	Wald	35S::SLIM1 #25 v Col-0	-1.48009	0.13885	IHW	0.370053	ashr	-0.101781	0.0908908
DAS30	AT3G16857	1929.96	~genotype	Wald	35S::SLIM1 #25 v Col-0	0.115466	0.908076	IHW	0.956104	ashr	0.00802483	0.098853
DAS30	AT3G55120	549.845	~genotype	Wald	35S::SLIM1 #25 v Col-0	-2.03222	0.0421314	IHW	0.190251	ashr	-0.176024	0.161171
DAS30	AT4G00040	1123.31	~genotype	Wald	35S::SLIM1 #25 v Col-0	0.62985	0.528793	IHW	0.703274	ashr	0.0435366	0.095317
DAS30	AT4G09820	58.3923	~genotype	Wald	35S::SLIM1 #25 v Col-0	-0.180137	0.857045	IHW	1	ashr	-0.0115548	0.154089
DAS30	AT4G22880	581.507	~genotype	Wald	35S::SLIM1 #25 v Col-0	-2.1312	0.0330729	IHW	0.183841	ashr	-0.181396	0.29351
DAS30	AT4G25640	4600.11	~genotype	Wald	35S::SLIM1 #25 v Col-0	-1.48485	0.137584	IHW	0.275045	ashr	-0.0932048	0.0769836
DAS30	AT4G34135	537.693	~genotype	Wald	35S::SLIM1 #25 v Col-0	1.50685	0.131849	IHW	0.352871	ashr	0.11759	0.177824
DAS30	AT5G07990	251.607	~genotype	Wald	35S::SLIM1 #25 v Col-0	-3.26022	0.00111324	IHW	0.0124757	ashr	-0.525548	0.403376
DAS30	AT5G13930	4403.29	~genotype	Wald	35S::SLIM1 #25 v Col-0	-1.96986	0.0488548	IHW	0.182737	ashr	-0.174462	0.19859
DAS30	AT5G24530	7740.52	~genotype	Wald	35S::SLIM1 #25 v Col-0	-0.392193	0.694916	IHW	0.985248	ashr	-0.0256144	0.153597
DAS30	AT5G42800	897.978	~genotype	Wald	35S::SLIM1 #25 v Col-0	-2.02476	0.0428917	IHW	0.135924	ashr	-0.166592	0.271642
DAS30	AT5G54060	215.685	~genotype	Wald	35S::SLIM1 #25 v Col-0	-1.68055	0.0928498	IHW	0.273201	ashr	-0.122109	0.233108
DAS37	AT1G56650	163.737	~genotype	Wald	slim1-cr v Col-0	1.3646	0.172378	IHW	0.476559	ashr	0.0978624	0.318029
DAS37	AT1G66390	15.6184	~genotype	Wald	slim1-cr v Col-0	0.759165	0.447754	IHW	1	ashr	0.0564168	0.246365
DAS37	AT2G26670	4317.96	~genotype	Wald	slim1-cr v Col-0	-0.672889	0.501018	IHW	0.620117	ashr	-0.0397265	0.0652181
DAS37	AT2G40890	2539.17	~genotype	Wald	slim1-cr v Col-0	-1.23285	0.217634	IHW	0.371771	ashr	-0.114789	0.127172
DAS37	AT3G16857	2476.74	~genotype	Wald	slim1-cr v Col-0	-2.42786	0.015188	IHW	0.0725762	ashr	-0.188004	0.0910837
DAS37	AT3G55120	421.601	~genotype	Wald	slim1-cr v Col-0	3.02346	0.00249898	IHW	0.0221234	ashr	0.339653	0.165517
DAS37	AT4G00040	1342.92	~genotype	Wald	slim1-cr v Col-0	1.17693	0.239223	IHW	0.480016	ashr	0.0825363	0.0808863
DAS37	AT4G09820	72.698	~genotype	Wald	slim1-cr v Col-0	0.0356263	0.97158	IHW	1	ashr	0.00258246	0.226025
DAS37	AT4G22880	445.164	~genotype	Wald	slim1-cr v Col-0	0.409	0.68254	IHW	0.81181	ashr	0.0276236	0.247648
DAS37	AT4G25640	6002.16	~genotype	Wald	slim1-cr v Col-0	-3.37183	0.000746699	IHW	0.00848474	ashr	-0.274815	0.0954953
DAS37	AT4G34135	725.228	~genotype	Wald	slim1-cr v Col-0	-1.47677	0.139737	IHW	0.317006	ashr	-0.148785	0.19773
DAS37	AT5G07990	225.837	~genotype	Wald	slim1-cr v Col-0	0.219734	0.826078	IHW	1	ashr	0.0184194	0.195273
DAS37	AT5G13930	3213.16	~genotype	Wald	slim1-cr v Col-0	2.67435	0.00748751	IHW	0.0370624	ashr	0.407969	0.387765
DAS37	AT5G24530	9392.79	~genotype	Wald	slim1-cr v Col-0	-5.12781	2.93127e-07	IHW	2.24526e-05	ashr	-1.28178	0.295902
DAS37	AT5G42800	877.365	~genotype	Wald	slim1-cr v Col-0	0.411383	0.680792	IHW	0.566462	ashr	0.0276628	0.248572
DAS37	AT5G54060	207.443	~genotype	Wald	slim1-cr v Col-0	0.0921085	0.926612	IHW	1	ashr	0.00579609	0.253608
DAS37	AT1G56650	163.737	~genotype	Wald	35S::SLIM1 #17 v Col-0	-0.489215	0.624689	IHW	0.723489	ashr	-0.0913409	0.453485
DAS37	AT1G66390	15.6184	~genotype	Wald	35S::SLIM1 #17 v Col-0	0.0259511	0.979296	IHW	0.989239	ashr	0.00506874	0.384427
DAS37	AT2G26670	4317.96	~genotype	Wald	35S::SLIM1 #17 v Col-0	3.1737	0.00150509	IHW	0.00562211	ashr	0.21383	0.0707979
DAS37	AT2G40890	2539.17	~genotype	Wald	35S::SLIM1 #17 v Col-0	-4.25065	2.13151e-05	IHW	0.000143617	ashr	-0.614964	0.16032
DAS37	AT3G16857	2476.74	~genotype	Wald	35S::SLIM1 #17 v Col-0	10.3099	6.35682e-25	IHW	1.07685e-22	ashr	0.971322	0.0977669
DAS37	AT3G55120	421.601	~genotype	Wald	35S::SLIM1 #17 v Col-0	-2.24573	0.024721	IHW	0.056738	ashr	-0.324913	0.170234
DAS37	AT4G00040	1342.92	~genotype	Wald	35S::SLIM1 #17 v Col-0	2.47234	0.0134233	IHW	0.0346763	ashr	0.204213	0.088959
DAS37	AT4G09820	72.698	~genotype	Wald	35S::SLIM1 #17 v Col-0	-1.00615	0.314343	IHW	0.436188	ashr	-0.210764	0.40969
DAS37	AT4G22880	445.164	~genotype	Wald	35S::SLIM1 #17 v Col-0	-0.47441	0.635207	IHW	0.732301	ashr	-0.0920566	0.420714
DAS37	AT4G25640	6002.16	~genotype	Wald	35S::SLIM1 #17 v Col-0	-6.03874	1.55323e-09	IHW	2.71255e-08	ashr	-0.577602	0.0995437
DAS37	AT4G34135	725.228	~genotype	Wald	35S::SLIM1 #17 v Col-0	2.76178	0.00574873	IHW	0.018638	ashr	0.608827	0.303037
DAS37	AT5G07990	225.837	~genotype	Wald	35S::SLIM1 #17 v Col-0	0.214587	0.830089	IHW	0.881935	ashr	0.0416351	0.296975
DAS37	AT5G13930	3213.16	~genotype	Wald	35S::SLIM1 #17 v Col-0	2.20575	0.0274018	IHW	0.0740062	ashr	0.510383	0.355276
DAS37	AT5G24530	9392.79	~genotype	Wald	35S::SLIM1 #17 v Col-0	-5.80968	6.25907e-09	IHW	9.70513e-08	ashr	-1.4911	0.294589
DAS37	AT5G42800	877.365	~genotype	Wald	35S::SLIM1 #17 v Col-0	0.804906	0.420874	IHW	0.542829	ashr	0.160448	0.440879
DAS37	AT5G54060	207.443	~genotype	Wald	35S::SLIM1 #17 v Col-0	-1.65132	0.0986733	IHW	0.174375	ashr	-0.372905	0.571869
DAS37	AT1G56650	163.737	~genotype	Wald	35S::SLIM1 #25 v Col-0	-0.789761	0.429668	IHW	0.666202	ashr	-0.10237	0.399272
DAS37	AT1G66390	15.6184	~genotype	Wald	35S::SLIM1 #25 v Col-0	-0.796681	0.425636	IHW	0.787176	ashr	-0.104534	0.342036
DAS37	AT2G26670	4317.96	~genotype	Wald	35S::SLIM1 #25 v Col-0	1.42003	0.155599	IHW	0.342325	ashr	0.0785484	0.0666012
DAS37	AT2G40890	2539.17	~genotype	Wald	35S::SLIM1 #25 v Col-0	-2.88546	0.00390846	IHW	0.0240434	ashr	-0.360791	0.170646
DAS37	AT3G16857	2476.74	~genotype	Wald	35S::SLIM1 #25 v Col-0	5.38571	7.21604e-08	IHW	1.2186e-06	ashr	0.49036	0.0993616
DAS37	AT3G55120	421.601	~genotype	Wald	35S::SLIM1 #25 v Col-0	-1.34871	0.177429	IHW	0.345231	ashr	-0.133937	0.147914
DAS37	AT4G00040	1342.92	~genotype	Wald	35S::SLIM1 #25 v Col-0	-1.44089	0.149617	IHW	0.331217	ashr	-0.0954529	0.0832827
DAS37	AT4G09820	72.698	~genotype	Wald	35S::SLIM1 #25 v Col-0	-1.3384	0.180765	IHW	0.40146	ashr	-0.201693	0.393457
DAS37	AT4G22880	445.164	~genotype	Wald	35S::SLIM1 #25 v Col-0	-1.04594	0.295588	IHW	0.417253	ashr	-0.145102	0.395693
DAS37	AT4G25640	6002.16	~genotype	Wald	35S::SLIM1 #25 v Col-0	-1.62591	0.103969	IHW	0.272589	ashr	-0.117997	0.0932256
DAS37	AT4G34135	725.228	~genotype	Wald	35S::SLIM1 #25 v Col-0	0.812954	0.416245	IHW	0.490458	ashr	0.0936213	0.203049
DAS37	AT5G07990	225.837	~genotype	Wald	35S::SLIM1 #25 v Col-0	-1.04581	0.29565	IHW	0.401706	ashr	-0.137737	0.272122
DAS37	AT5G13930	3213.16	~genotype	Wald	35S::SLIM1 #25 v Col-0	0.436531	0.662452	IHW	0.822471	ashr	0.0509342	0.220896
DAS37	AT5G24530	9392.79	~genotype	Wald	35S::SLIM1 #25 v Col-0	-4.71436	2.4247e-06	IHW	3.81426e-05	ashr	-1.16303	0.305404
DAS37	AT5G42800	877.365	~genotype	Wald	35S::SLIM1 #25 v Col-0	-1.13463	0.256531	IHW	0.38776	ashr	-0.161255	0.411014
DAS37	AT5G54060	207.443	~genotype	Wald	35S::SLIM1 #25 v Col-0	-1.70115	0.0889145	IHW	0.167897	ashr	-0.297623	0.567468
DAS44	AT1G56650	520.373	~genotype	Wald	slim1-cr v Col-0	-3.0545	0.00225434	IHW	0.0164086	ashr	-0.593983	0.295855
DAS44	AT1G66390	136.519	~genotype	Wald	slim1-cr v Col-0	-0.683531	0.494271	IHW	0.783687	ashr	-0.0791881	0.333544
DAS44	AT2G26670	5578.22	~genotype	Wald	slim1-cr v Col-0	-0.629507	0.529017	IHW	0.523964	ashr	-0.0603807	0.107878
DAS44	AT2G40890	2142.48	~genotype	Wald	slim1-cr v Col-0	-3.6847	0.000228973	IHW	0.00339803	ashr	-0.380199	0.114694
DAS44	AT3G16857	3855.38	~genotype	Wald	slim1-cr v Col-0	0.195694	0.84485	IHW	0.818939	ashr	0.0185895	0.106465
DAS44	AT3G55120	251.171	~genotype	Wald	slim1-cr v Col-0	0.344026	0.730827	IHW	0.989246	ashr	0.0469075	0.177644
DAS44	AT4G00040	1862.8	~genotype	Wald	slim1-cr v Col-0	0.0336813	0.973131	IHW	0.904764	ashr	0.00289478	0.0942181
DAS44	AT4G09820	64.9671	~genotype	Wald	slim1-cr v Col-0	-0.796444	0.425774	IHW	0.704686	ashr	-0.120971	0.288914
DAS44	AT4G22880	349.992	~genotype	Wald	slim1-cr v Col-0	-0.841324	0.400166	IHW	0.599935	ashr	-0.125179	0.298401
DAS44	AT4G25640	4117.22	~genotype	Wald	slim1-cr v Col-0	-1.62074	0.105073	IHW	0.188943	ashr	-0.165595	0.117198
DAS44	AT4G34135	1452.9	~genotype	Wald	slim1-cr v Col-0	-0.974554	0.329782	IHW	0.423366	ashr	-0.150974	0.227653
DAS44	AT5G07990	194.78	~genotype	Wald	slim1-cr v Col-0	-1.20969	0.226398	IHW	0.400213	ashr	-0.191923	0.236892
DAS44	AT5G13930	3894.71	~genotype	Wald	slim1-cr v Col-0	-0.496129	0.619803	IHW	0.660045	ashr	-0.0753293	0.276664
DAS44	AT5G24530	7167.31	~genotype	Wald	slim1-cr v Col-0	-2.74842	0.00598828	IHW	0.0272637	ashr	-0.525243	0.316579
DAS44	AT5G35550	5.21551	~genotype	Wald	slim1-cr v Col-0	-0.784464	0.432768	IHW	1	ashr	-0.0676987	0.352692
DAS44	AT5G42800	1435.46	~genotype	Wald	slim1-cr v Col-0	-1.26082	0.207373	IHW	0.304806	ashr	-0.199658	0.297027
DAS44	AT5G54060	118.241	~genotype	Wald	slim1-cr v Col-0	-1.47139	0.141186	IHW	0.30602	ashr	-0.229759	0.316286
DAS44	AT1G56650	520.373	~genotype	Wald	35S::SLIM1 #17 v Col-0	5.8578	4.6904e-09	IHW	5.57141e-08	ashr	1.80733	0.338009
DAS44	AT1G66390	136.519	~genotype	Wald	35S::SLIM1 #17 v Col-0	6.61194	3.79314e-11	IHW	5.52719e-10	ashr	4.75283	0.841015
DAS44	AT2G26670	5578.22	~genotype	Wald	35S::SLIM1 #17 v Col-0	2.7448	0.00605471	IHW	0.0192782	ashr	0.292834	0.116721
DAS44	AT2G40890	2142.48	~genotype	Wald	35S::SLIM1 #17 v Col-0	-8.8713	7.2298e-19	IHW	4.03971e-17	ashr	-1.00792	0.1171
DAS44	AT3G16857	3855.38	~genotype	Wald	35S::SLIM1 #17 v Col-0	-2.03449	0.0419019	IHW	0.0891488	ashr	-0.212772	0.113891
DAS44	AT3G55120	251.171	~genotype	Wald	35S::SLIM1 #17 v Col-0	1.12057	0.262473	IHW	0.332657	ashr	0.178364	0.196554
DAS44	AT4G00040	1862.8	~genotype	Wald	35S::SLIM1 #17 v Col-0	8.60793	7.43934e-18	IHW	3.77561e-16	ashr	0.858295	0.103138
DAS44	AT4G09820	64.9671	~genotype	Wald	35S::SLIM1 #17 v Col-0	1.807	0.0707627	IHW	0.111537	ashr	0.483836	0.446003
DAS44	AT4G22880	349.992	~genotype	Wald	35S::SLIM1 #17 v Col-0	2.50221	0.0123421	IHW	0.0265374	ashr	0.841763	0.561896
DAS44	AT4G25640	4117.22	~genotype	Wald	35S::SLIM1 #17 v Col-0	7.60168	2.92311e-14	IHW	9.14203e-13	ashr	0.926216	0.127255
DAS44	AT4G34135	1452.9	~genotype	Wald	35S::SLIM1 #17 v Col-0	5.82219	5.80821e-09	IHW	8.61732e-08	ashr	1.65133	0.307601
DAS44	AT5G07990	194.78	~genotype	Wald	35S::SLIM1 #17 v Col-0	3.44294	0.000575421	IHW	0.00205757	ashr	0.888513	0.332347
DAS44	AT5G13930	3894.71	~genotype	Wald	35S::SLIM1 #17 v Col-0	3.73619	0.000186827	IHW	0.000866199	ashr	1.43564	0.50994
DAS44	AT5G24530	7167.31	~genotype	Wald	35S::SLIM1 #17 v Col-0	-5.39136	6.99265e-08	IHW	8.10575e-07	ashr	-1.89775	0.398567
DAS44	AT5G35550	5.21551	~genotype	Wald	35S::SLIM1 #17 v Col-0	2.15041	0.031523	IHW	0.0571594	ashr	0.742915	0.781634
DAS44	AT5G42800	1435.46	~genotype	Wald	35S::SLIM1 #17 v Col-0	2.52354	0.0116179	IHW	0.0313993	ashr	0.798455	0.50529
DAS44	AT5G54060	118.241	~genotype	Wald	35S::SLIM1 #17 v Col-0	1.99296	0.0462659	IHW	0.0758169	ashr	0.579123	0.497519
DAS44	AT1G56650	520.373	~genotype	Wald	35S::SLIM1 #25 v Col-0	6.53097	6.53461e-11	IHW	1.29065e-09	ashr	2.06393	0.338004
DAS44	AT1G66390	136.519	~genotype	Wald	35S::SLIM1 #25 v Col-0	7.09875	1.2589e-12	IHW	1.80023e-11	ashr	5.15409	0.900375
DAS44	AT2G26670	5578.22	~genotype	Wald	35S::SLIM1 #25 v Col-0	3.96457	7.35269e-05	IHW	0.00027658	ashr	0.437783	0.119014
DAS44	AT2G40890	2142.48	~genotype	Wald	35S::SLIM1 #25 v Col-0	-6.43158	1.26282e-10	IHW	1.61473e-09	ashr	-0.716228	0.11838
DAS44	AT3G16857	3855.38	~genotype	Wald	35S::SLIM1 #25 v Col-0	-2.77949	0.00544442	IHW	0.0135188	ashr	-0.300168	0.115563
DAS44	AT3G55120	251.171	~genotype	Wald	35S::SLIM1 #25 v Col-0	0.187347	0.851389	IHW	0.720585	ashr	0.030706	0.194009
DAS44	AT4G00040	1862.8	~genotype	Wald	35S::SLIM1 #25 v Col-0	8.3473	6.98438e-17	IHW	2.08652e-15	ashr	0.833471	0.103632
DAS44	AT4G09820	64.9671	~genotype	Wald	35S::SLIM1 #25 v Col-0	1.14951	0.250346	IHW	0.307044	ashr	0.288219	0.393662
DAS44	AT4G22880	349.992	~genotype	Wald	35S::SLIM1 #25 v Col-0	0.527552	0.59781	IHW	0.687134	ashr	0.126564	0.378465
DAS44	AT4G25640	4117.22	~genotype	Wald	35S::SLIM1 #25 v Col-0	7.74872	9.28266e-15	IHW	2.19593e-13	ashr	0.948584	0.127489
DAS44	AT4G34135	1452.9	~genotype	Wald	35S::SLIM1 #25 v Col-0	7.7076	1.28206e-14	IHW	2.9682e-13	ashr	2.25275	0.30843
DAS44	AT5G07990	194.78	~genotype	Wald	35S::SLIM1 #25 v Col-0	1.59324	0.111106	IHW	0.198226	ashr	0.331163	0.27793
DAS44	AT5G13930	3894.71	~genotype	Wald	35S::SLIM1 #25 v Col-0	2.36697	0.0179346	IHW	0.0397603	ashr	0.758274	0.496864
DAS44	AT5G24530	7167.31	~genotype	Wald	35S::SLIM1 #25 v Col-0	-2.8812	0.00396159	IHW	0.00943641	ashr	-0.874821	0.425047
DAS44	AT5G35550	5.21551	~genotype	Wald	35S::SLIM1 #25 v Col-0	3.0303	0.00244314	IHW	0.00672421	ashr	1.59922	0.985656
DAS44	AT5G42800	1435.46	~genotype	Wald	35S::SLIM1 #25 v Col-0	0.729844	0.465486	IHW	0.61246	ashr	0.170976	0.356692
DAS44	AT5G54060	118.241	~genotype	Wald	35S::SLIM1 #25 v Col-0	1.45367	0.146039	IHW	0.183241	ashr	0.399545	0.449917

## Sheet: Fig 3a
group1	group2	Mean group1	Mean group2	Difference	SE of difference	test	t ratio	df	P value
Col-0	EV	34.15	33.3	0.85	0.958	t-test	0.8873	38	0.3805
Col-0	slim1-cr	34.15	32.75	1.4	0.9629	t-test	1.454	38	0.1542
Col-0	35S::SLIM1 #17	34.15	29.75	4.4	0.9379	t-test	4.691	38	<0.0001
Col-0	35S::SLIM1 #25	34.15	28.85	5.3	0.9557	t-test	5.545	38	<0.0001
Col-0	35S::SLIM1 #39	34.15	28.85	5.3	0.8631	t-test	6.14	38	<0.0001

## Sheet: Figure 3b
timepoint	geneID	baseMean	model	test	contrast	stat	pvalue	padjMethod	padj	lfcModeration	log2FoldChange	lfcSE
DAS37	AT1G02220	350.251	~genotype	Wald	slim1-cr v Col-0	-4.32283	1.54038e-05	IHW	0.000660466	ashr	-0.913149	0.315274
DAS37	AT1G04120	3657.26	~genotype	Wald	slim1-cr v Col-0	-1.72482	0.0845597	IHW	0.211701	ashr	-0.168711	0.138087
DAS37	AT1G04620	999.176	~genotype	Wald	slim1-cr v Col-0	-0.37625	0.706731	IHW	0.830287	ashr	-0.0288407	0.0914096
DAS37	AT1G19200	97.3623	~genotype	Wald	slim1-cr v Col-0	-0.420482	0.674133	IHW	1	ashr	-0.0396551	0.155765
DAS37	AT1G21400	2102.95	~genotype	Wald	slim1-cr v Col-0	-2.6014	0.00928444	IHW	0.050208	ashr	-0.261186	0.13623
DAS37	AT1G22160	275.231	~genotype	Wald	slim1-cr v Col-0	0.059485	0.952566	IHW	1	ashr	0.00524615	0.181064
DAS37	AT1G44100	1649.44	~genotype	Wald	slim1-cr v Col-0	1.88608	0.0592838	IHW	0.147595	ashr	0.192631	0.152579
DAS37	AT1G47128	27343.2	~genotype	Wald	slim1-cr v Col-0	-1.7492	0.080256	IHW	0.207579	ashr	-0.169203	0.134141
DAS37	AT1G56650	163.737	~genotype	Wald	slim1-cr v Col-0	1.3646	0.172378	IHW	0.476559	ashr	0.0978624	0.318029
DAS37	AT1G58360	4562.66	~genotype	Wald	slim1-cr v Col-0	-1.04744	0.294898	IHW	0.454479	ashr	-0.0990801	0.134353
DAS37	AT1G66580	5977.67	~genotype	Wald	slim1-cr v Col-0	-0.779068	0.43594	IHW	0.559179	ashr	-0.0664967	0.108258
DAS37	AT1G69490	1413.84	~genotype	Wald	slim1-cr v Col-0	-5.18705	2.13649e-07	IHW	1.77447e-05	ashr	-1.1632	0.266988
DAS37	AT1G71190	1024.04	~genotype	Wald	slim1-cr v Col-0	-2.22314	0.0262061	IHW	0.105596	ashr	-0.194027	0.108726
DAS37	AT2G01890	64.0037	~genotype	Wald	slim1-cr v Col-0	2.65603	0.00790658	IHW	0.0999694	ashr	0.423456	0.461125
DAS37	AT2G02990	147.756	~genotype	Wald	slim1-cr v Col-0	-0.695665	0.486638	IHW	0.877994	ashr	-0.0553355	0.224736
DAS37	AT2G19190	963.617	~genotype	Wald	slim1-cr v Col-0	-4.49581	6.93061e-06	IHW	0.000293085	ashr	-1.53278	0.477389
DAS37	AT2G29350	2866.42	~genotype	Wald	slim1-cr v Col-0	-3.40345	0.000665416	IHW	0.0076815	ashr	-0.830439	0.553822
DAS37	AT2G31260	1219.76	~genotype	Wald	slim1-cr v Col-0	-2.2196	0.0264457	IHW	0.128888	ashr	-0.184833	0.10131
DAS37	AT2G35980	244.776	~genotype	Wald	slim1-cr v Col-0	-5.21906	1.79831e-07	IHW	2.41617e-05	ashr	-1.57872	0.353526
DAS37	AT3G06420	480.528	~genotype	Wald	slim1-cr v Col-0	-1.39042	0.164401	IHW	0.351287	ashr	-0.131559	0.130813
DAS37	AT3G19580	775.974	~genotype	Wald	slim1-cr v Col-0	-3.00558	0.00265075	IHW	0.0236218	ashr	-0.471707	0.333476
DAS37	AT3G20770	9229.82	~genotype	Wald	slim1-cr v Col-0	-3.9129	9.11944e-05	IHW	0.00187151	ashr	-0.312317	0.0919358
DAS37	AT3G44880	5189.84	~genotype	Wald	slim1-cr v Col-0	-1.2486	0.211812	IHW	0.371283	ashr	-0.122348	0.14921
DAS37	AT3G49620	566.565	~genotype	Wald	slim1-cr v Col-0	-1.39386	0.163359	IHW	0.406986	ashr	-0.111071	0.305977
DAS37	AT3G52780	20.0062	~genotype	Wald	slim1-cr v Col-0	-1.22696	NA	IHW	NA	ashr	-0.0752197	0.316944
DAS37	AT3G60140	321.439	~genotype	Wald	slim1-cr v Col-0	-3.13702	0.00170673	IHW	0.016877	ashr	-0.703736	0.72457
DAS37	AT4G04620	649.768	~genotype	Wald	slim1-cr v Col-0	0.250914	0.80188	IHW	1	ashr	0.0226408	0.122181
DAS37	AT4G13250	8508.78	~genotype	Wald	slim1-cr v Col-0	-2.10599	0.0352056	IHW	0.117767	ashr	-0.208578	0.137413
DAS37	AT4G17670	641.49	~genotype	Wald	slim1-cr v Col-0	-2.23337	0.0255248	IHW	0.110189	ashr	-0.264673	0.246501
DAS37	AT4G21980	1762.26	~genotype	Wald	slim1-cr v Col-0	-3.20739	0.00133946	IHW	0.0131051	ashr	-0.240937	0.0861488
DAS37	AT4G23810	2499.32	~genotype	Wald	slim1-cr v Col-0	-3.7837	0.000154513	IHW	0.00284263	ashr	-0.599213	0.266958
DAS37	AT4G30270	18628.6	~genotype	Wald	slim1-cr v Col-0	-3.94319	8.04034e-05	IHW	0.00160711	ashr	-0.813411	0.348207
DAS37	AT4G37000	1729.98	~genotype	Wald	slim1-cr v Col-0	1.04854	0.294391	IHW	0.456806	ashr	0.0857438	0.100588
DAS37	AT4G39090	37627	~genotype	Wald	slim1-cr v Col-0	-3.71939	0.000199708	IHW	0.00339049	ashr	-0.355809	0.119679
DAS37	AT5G03280	4280.37	~genotype	Wald	slim1-cr v Col-0	-0.0488147	0.961067	IHW	0.924465	ashr	-0.00348836	0.0828475
DAS37	AT5G04900	813.884	~genotype	Wald	slim1-cr v Col-0	3.18959	0.00142477	IHW	0.0173073	ashr	0.256171	0.0940222
DAS37	AT5G11520	3609.34	~genotype	Wald	slim1-cr v Col-0	-2.25822	0.023932	IHW	0.0986385	ashr	-0.169674	0.0877583
DAS37	AT5G13080	220.449	~genotype	Wald	slim1-cr v Col-0	-5.31383	1.07347e-07	IHW	1.59602e-05	ashr	-1.67462	0.367179
DAS37	AT5G13180	3319.72	~genotype	Wald	slim1-cr v Col-0	-2.29186	0.0219136	IHW	0.0678656	ashr	-0.239168	0.152419
DAS37	AT5G13800	5102.14	~genotype	Wald	slim1-cr v Col-0	-0.745463	0.455992	IHW	0.503706	ashr	-0.0691894	0.17892
DAS37	AT5G39610	712.413	~genotype	Wald	slim1-cr v Col-0	-6.87539	6.18226e-12	IHW	4.26047e-09	ashr	-1.68041	0.261278
DAS37	AT5G45890	913.741	~genotype	Wald	slim1-cr v Col-0	-4.02168	5.77852e-05	IHW	0.00135767	ashr	-1.98217	2.64822
DAS37	AT5G45900	845.775	~genotype	Wald	slim1-cr v Col-0	-2.23055	0.0257112	IHW	0.0753769	ashr	-0.209621	0.122939
DAS37	AT5G59220	344.962	~genotype	Wald	slim1-cr v Col-0	0.402535	NA	IHW	NA	ashr	0.0307217	0.221224
DAS37	AT1G02220	350.251	~genotype	Wald	35S::SLIM1 #17 v Col-0	-3.71108	0.000206379	IHW	0.00088113	ashr	-0.772623	0.261275
DAS37	AT1G04120	3657.26	~genotype	Wald	35S::SLIM1 #17 v Col-0	-3.98356	6.78905e-05	IHW	0.000395778	ashr	-0.600653	0.169197
DAS37	AT1G04620	999.176	~genotype	Wald	35S::SLIM1 #17 v Col-0	-1.68731	0.0915429	IHW	0.177545	ashr	-0.160424	0.105046
DAS37	AT1G19200	97.3623	~genotype	Wald	35S::SLIM1 #17 v Col-0	3.50336	0.00045943	IHW	0.00205621	ashr	0.689694	0.243403
DAS37	AT1G21400	2102.95	~genotype	Wald	35S::SLIM1 #17 v Col-0	6.36232	1.98725e-10	IHW	4.14752e-09	ashr	0.897033	0.153963
DAS37	AT1G22160	275.231	~genotype	Wald	35S::SLIM1 #17 v Col-0	5.74402	9.24527e-09	IHW	1.37987e-07	ashr	1.87347	0.371616
DAS37	AT1G44100	1649.44	~genotype	Wald	35S::SLIM1 #17 v Col-0	3.66288	0.000249393	IHW	0.00122131	ashr	0.598712	0.188393
DAS37	AT1G47128	27343.2	~genotype	Wald	35S::SLIM1 #17 v Col-0	3.53026	0.000415145	IHW	0.00188878	ashr	0.506997	0.16102
DAS37	AT1G56650	163.737	~genotype	Wald	35S::SLIM1 #17 v Col-0	-0.489215	0.624689	IHW	0.723489	ashr	-0.0913409	0.453485
DAS37	AT1G58360	4562.66	~genotype	Wald	35S::SLIM1 #17 v Col-0	2.22509	0.0260753	IHW	0.0710374	ashr	0.325148	0.172494
DAS37	AT1G66580	5977.67	~genotype	Wald	35S::SLIM1 #17 v Col-0	-4.51587	6.30559e-06	IHW	4.90923e-05	ashr	-0.554487	0.132014
DAS37	AT1G69490	1413.84	~genotype	Wald	35S::SLIM1 #17 v Col-0	9.83861	7.67675e-23	IHW	1.01922e-20	ashr	2.28788	0.241167
DAS37	AT1G71190	1024.04	~genotype	Wald	35S::SLIM1 #17 v Col-0	4.9429	7.69683e-07	IHW	7.50053e-06	ashr	0.550103	0.117883
DAS37	AT2G01890	64.0037	~genotype	Wald	35S::SLIM1 #17 v Col-0	2.11544	0.0343928	IHW	0.0744475	ashr	0.521316	0.422126
DAS37	AT2G02990	147.756	~genotype	Wald	35S::SLIM1 #17 v Col-0	-0.0256038	0.979573	IHW	0.989239	ashr	-0.0050607	0.34195
DAS37	AT2G19190	963.617	~genotype	Wald	35S::SLIM1 #17 v Col-0	-4.93953	7.83107e-07	IHW	8.31137e-06	ashr	-1.81642	0.453702
DAS37	AT2G29350	2866.42	~genotype	Wald	35S::SLIM1 #17 v Col-0	1.85527	0.0635578	IHW	0.122418	ashr	0.418828	0.359256
DAS37	AT2G31260	1219.76	~genotype	Wald	35S::SLIM1 #17 v Col-0	-1.07605	0.281904	IHW	0.401186	ashr	-0.101844	0.104592
DAS37	AT2G35980	244.776	~genotype	Wald	35S::SLIM1 #17 v Col-0	1.14941	0.250388	IHW	0.365863	ashr	0.218959	0.266162
DAS37	AT3G06420	480.528	~genotype	Wald	35S::SLIM1 #17 v Col-0	6.38809	1.67973e-10	IHW	3.0535e-09	ashr	0.964118	0.166309
DAS37	AT3G19580	775.974	~genotype	Wald	35S::SLIM1 #17 v Col-0	4.14402	3.41268e-05	IHW	0.00021625	ashr	1.01822	0.319297
DAS37	AT3G20770	9229.82	~genotype	Wald	35S::SLIM1 #17 v Col-0	2.9312	0.0033765	IHW	0.0110296	ashr	0.257648	0.0945647
DAS37	AT3G44880	5189.84	~genotype	Wald	35S::SLIM1 #17 v Col-0	3.09688	0.00195572	IHW	0.00628432	ashr	0.526078	0.201683
DAS37	AT3G49620	566.565	~genotype	Wald	35S::SLIM1 #17 v Col-0	-2.54572	0.0109052	IHW	0.0292078	ashr	-0.788701	0.723168
DAS37	AT3G52780	20.0062	~genotype	Wald	35S::SLIM1 #17 v Col-0	3.09232	NA	IHW	NA	ashr	1.14788	1.00013
DAS37	AT3G60140	321.439	~genotype	Wald	35S::SLIM1 #17 v Col-0	4.53899	5.65237e-06	IHW	4.45354e-05	ashr	2.2119	0.687318
DAS37	AT4G04620	649.768	~genotype	Wald	35S::SLIM1 #17 v Col-0	6.65679	2.79864e-11	IHW	6.81327e-10	ashr	1.01396	0.167451
DAS37	AT4G13250	8508.78	~genotype	Wald	35S::SLIM1 #17 v Col-0	1.04172	0.297541	IHW	0.418626	ashr	0.131517	0.147001
DAS37	AT4G17670	641.49	~genotype	Wald	35S::SLIM1 #17 v Col-0	2.69646	0.00700814	IHW	0.0202879	ashr	0.582372	0.294499
DAS37	AT4G21980	1762.26	~genotype	Wald	35S::SLIM1 #17 v Col-0	5.59891	2.15703e-08	IHW	2.99304e-07	ashr	0.47782	0.0883319
DAS37	AT4G23810	2499.32	~genotype	Wald	35S::SLIM1 #17 v Col-0	0.566723	0.570903	IHW	0.678078	ashr	0.0856038	0.18522
DAS37	AT4G30270	18628.6	~genotype	Wald	35S::SLIM1 #17 v Col-0	6.69326	2.18254e-11	IHW	4.79232e-10	ashr	1.71724	0.280081
DAS37	AT4G37000	1729.98	~genotype	Wald	35S::SLIM1 #17 v Col-0	-0.403958	0.686244	IHW	0.773434	ashr	-0.0396289	0.108556
DAS37	AT4G39090	37627	~genotype	Wald	35S::SLIM1 #17 v Col-0	6.01888	1.75625e-09	IHW	2.70718e-08	ashr	0.696063	0.122772
DAS37	AT5G03280	4280.37	~genotype	Wald	35S::SLIM1 #17 v Col-0	0.850396	0.395105	IHW	0.517546	ashr	0.0707716	0.0903623
DAS37	AT5G04900	813.884	~genotype	Wald	35S::SLIM1 #17 v Col-0	2.97815	0.00289998	IHW	0.0105428	ashr	0.272427	0.098669
DAS37	AT5G11520	3609.34	~genotype	Wald	35S::SLIM1 #17 v Col-0	0.226627	0.820714	IHW	0.874698	ashr	0.0183934	0.0876012
DAS37	AT5G13080	220.449	~genotype	Wald	35S::SLIM1 #17 v Col-0	3.0796	0.00207279	IHW	0.00692798	ashr	0.753486	0.349244
DAS37	AT5G13180	3319.72	~genotype	Wald	35S::SLIM1 #17 v Col-0	-0.383175	0.70159	IHW	0.785132	ashr	-0.0504484	0.154429
DAS37	AT5G13800	5102.14	~genotype	Wald	35S::SLIM1 #17 v Col-0	2.25291	0.0242651	IHW	0.0558431	ashr	0.478001	0.297611
DAS37	AT5G39610	712.413	~genotype	Wald	35S::SLIM1 #17 v Col-0	9.82225	9.03069e-23	IHW	1.13318e-20	ashr	2.34584	0.248129
DAS37	AT5G45890	913.741	~genotype	Wald	35S::SLIM1 #17 v Col-0	3.47631	0.000508358	IHW	0.00222922	ashr	1.38745	1.24876
DAS37	AT5G45900	845.775	~genotype	Wald	35S::SLIM1 #17 v Col-0	1.14175	0.253558	IHW	0.369248	ashr	0.129209	0.128818
DAS37	AT5G59220	344.962	~genotype	Wald	35S::SLIM1 #17 v Col-0	-0.143622	NA	IHW	NA	ashr	-0.0284117	0.352577
DAS37	AT1G02220	350.251	~genotype	Wald	35S::SLIM1 #25 v Col-0	-2.7299	0.00633534	IHW	0.0267745	ashr	-0.470541	0.272355
DAS37	AT1G04120	3657.26	~genotype	Wald	35S::SLIM1 #25 v Col-0	-4.43132	9.36567e-06	IHW	0.000101035	ashr	-0.674473	0.17873
DAS37	AT1G04620	999.176	~genotype	Wald	35S::SLIM1 #25 v Col-0	1.83163	0.0670058	IHW	0.17389	ashr	0.143822	0.102474
DAS37	AT1G19200	97.3623	~genotype	Wald	35S::SLIM1 #25 v Col-0	1.57901	0.114334	IHW	0.273456	ashr	0.195847	0.208046
DAS37	AT1G21400	2102.95	~genotype	Wald	35S::SLIM1 #25 v Col-0	4.00469	6.20993e-05	IHW	0.000546469	ashr	0.528649	0.158859
DAS37	AT1G22160	275.231	~genotype	Wald	35S::SLIM1 #25 v Col-0	3.2511	0.00114958	IHW	0.00620525	ashr	0.826733	0.418205
DAS37	AT1G44100	1649.44	~genotype	Wald	35S::SLIM1 #25 v Col-0	5.62547	1.85002e-08	IHW	3.51135e-07	ashr	0.989992	0.198231
DAS37	AT1G47128	27343.2	~genotype	Wald	35S::SLIM1 #25 v Col-0	2.59742	0.00939276	IHW	0.0413812	ashr	0.313115	0.169616
DAS37	AT1G56650	163.737	~genotype	Wald	35S::SLIM1 #25 v Col-0	-0.789761	0.429668	IHW	0.666202	ashr	-0.10237	0.399272
DAS37	AT1G58360	4562.66	~genotype	Wald	35S::SLIM1 #25 v Col-0	-0.294564	0.768327	IHW	0.937008	ashr	-0.0260288	0.127161
DAS37	AT1G66580	5977.67	~genotype	Wald	35S::SLIM1 #25 v Col-0	-1.78511	0.0742441	IHW	0.25442	ashr	-0.161495	0.124781
DAS37	AT1G69490	1413.84	~genotype	Wald	35S::SLIM1 #25 v Col-0	11.0701	1.7521e-28	IHW	2.2122e-26	ashr	2.61678	0.240722
DAS37	AT1G71190	1024.04	~genotype	Wald	35S::SLIM1 #25 v Col-0	3.3495	0.000809568	IHW	0.00352955	ashr	0.339651	0.124828
DAS37	AT2G01890	64.0037	~genotype	Wald	35S::SLIM1 #25 v Col-0	2.54151	0.0110376	IHW	0.0422111	ashr	0.601398	0.509763
DAS37	AT2G02990	147.756	~genotype	Wald	35S::SLIM1 #25 v Col-0	-0.940774	0.346821	IHW	0.555559	ashr	-0.125489	0.308618
DAS37	AT2G19190	963.617	~genotype	Wald	35S::SLIM1 #25 v Col-0	-3.39971	0.000674585	IHW	0.00301898	ashr	-1.03578	0.515998
DAS37	AT2G29350	2866.42	~genotype	Wald	35S::SLIM1 #25 v Col-0	1.40134	0.161113	IHW	0.401706	ashr	0.201401	0.299455
DAS37	AT2G31260	1219.76	~genotype	Wald	35S::SLIM1 #25 v Col-0	-0.010096	0.991945	IHW	1	ashr	-0.000691099	0.0872608
DAS37	AT2G35980	244.776	~genotype	Wald	35S::SLIM1 #25 v Col-0	3.72083	0.000198569	IHW	0.000998443	ashr	0.970691	0.379416
DAS37	AT3G06420	480.528	~genotype	Wald	35S::SLIM1 #25 v Col-0	4.7341	2.20034e-06	IHW	2.50149e-05	ashr	0.693558	0.167858
DAS37	AT3G19580	775.974	~genotype	Wald	35S::SLIM1 #25 v Col-0	9.36206	7.81941e-21	IHW	4.58469e-19	ashr	2.69275	0.295535
DAS37	AT3G20770	9229.82	~genotype	Wald	35S::SLIM1 #25 v Col-0	-0.229683	0.818338	IHW	1	ashr	-0.0143464	0.0773577
DAS37	AT3G44880	5189.84	~genotype	Wald	35S::SLIM1 #25 v Col-0	0.939709	0.347367	IHW	0.607164	ashr	0.0942423	0.154403
DAS37	AT3G49620	566.565	~genotype	Wald	35S::SLIM1 #25 v Col-0	-1.83185	0.0669738	IHW	0.17373	ashr	-0.342937	0.556452
DAS37	AT3G52780	20.0062	~genotype	Wald	35S::SLIM1 #25 v Col-0	2.50718	NA	IHW	NA	ashr	0.692836	0.922748
DAS37	AT3G60140	321.439	~genotype	Wald	35S::SLIM1 #25 v Col-0	4.82146	1.42513e-06	IHW	1.68041e-05	ashr	2.62061	0.659542
DAS37	AT4G04620	649.768	~genotype	Wald	35S::SLIM1 #25 v Col-0	2.75194	0.00592442	IHW	0.0254559	ashr	0.339502	0.170997
DAS37	AT4G13250	8508.78	~genotype	Wald	35S::SLIM1 #25 v Col-0	0.548144	0.583593	IHW	0.970649	ashr	0.0468607	0.120402
DAS37	AT4G17670	641.49	~genotype	Wald	35S::SLIM1 #25 v Col-0	-0.782866	0.433706	IHW	0.542958	ashr	-0.0891983	0.199138
DAS37	AT4G21980	1762.26	~genotype	Wald	35S::SLIM1 #25 v Col-0	3.01719	0.00255134	IHW	0.0134202	ashr	0.230119	0.09127
DAS37	AT4G23810	2499.32	~genotype	Wald	35S::SLIM1 #25 v Col-0	7.2947	2.99327e-13	IHW	1.47443e-11	ashr	1.54647	0.229415
DAS37	AT4G30270	18628.6	~genotype	Wald	35S::SLIM1 #25 v Col-0	0.580654	0.561474	IHW	0.90195	ashr	0.0619883	0.177072
DAS37	AT4G37000	1729.98	~genotype	Wald	35S::SLIM1 #25 v Col-0	1.12055	0.26248	IHW	0.538446	ashr	0.085678	0.101504
DAS37	AT4G39090	37627	~genotype	Wald	35S::SLIM1 #25 v Col-0	4.21595	2.48729e-05	IHW	0.000256709	ashr	0.464489	0.128131
DAS37	AT5G03280	4280.37	~genotype	Wald	35S::SLIM1 #25 v Col-0	0.82616	0.408713	IHW	0.616976	ashr	0.0535766	0.081504
DAS37	AT5G04900	813.884	~genotype	Wald	35S::SLIM1 #25 v Col-0	1.82782	0.0675768	IHW	0.17477	ashr	0.135369	0.0948686
DAS37	AT5G11520	3609.34	~genotype	Wald	35S::SLIM1 #25 v Col-0	-0.878135	0.379871	IHW	0.620623	ashr	-0.0565833	0.0808391
DAS37	AT5G13080	220.449	~genotype	Wald	35S::SLIM1 #25 v Col-0	3.32778	0.000875406	IHW	0.00362801	ashr	0.825975	0.393646
DAS37	AT5G13180	3319.72	~genotype	Wald	35S::SLIM1 #25 v Col-0	-4.24725	2.16411e-05	IHW	0.000211031	ashr	-0.666171	0.187715
DAS37	AT5G13800	5102.14	~genotype	Wald	35S::SLIM1 #25 v Col-0	0.245755	0.805872	IHW	0.965418	ashr	0.0269355	0.190941
DAS37	AT5G39610	712.413	~genotype	Wald	35S::SLIM1 #25 v Col-0	7.10907	1.1683e-12	IHW	3.82434e-11	ashr	1.70065	0.257965
DAS37	AT5G45890	913.741	~genotype	Wald	35S::SLIM1 #25 v Col-0	2.40203	0.0163043	IHW	0.0579836	ashr	0.565967	0.913084
DAS37	AT5G45900	845.775	~genotype	Wald	35S::SLIM1 #25 v Col-0	-0.126654	0.899214	IHW	0.803341	ashr	-0.00983705	0.104258
DAS37	AT5G59220	344.962	~genotype	Wald	35S::SLIM1 #25 v Col-0	-0.259447	NA	IHW	NA	ashr	-0.0316608	0.278696
DAS44	AT1G02220	336.785	~genotype	Wald	slim1-cr v Col-0	-3.62864	0.000284915	IHW	0.00503449	ashr	-0.704586	0.266536
DAS44	AT1G04120	3401.14	~genotype	Wald	slim1-cr v Col-0	-0.317636	0.750761	IHW	0.7526	ashr	-0.0359762	0.133988
DAS44	AT1G04620	764.83	~genotype	Wald	slim1-cr v Col-0	2.90849	0.00363181	IHW	0.0207778	ashr	0.290767	0.112739
DAS44	AT1G19200	206.779	~genotype	Wald	slim1-cr v Col-0	-2.52043	0.011721	IHW	0.0489727	ashr	-0.443865	0.25086
DAS44	AT1G21400	3766.28	~genotype	Wald	slim1-cr v Col-0	0.196027	0.844589	IHW	0.731664	ashr	0.0250201	0.159455
DAS44	AT1G22160	918.519	~genotype	Wald	slim1-cr v Col-0	-2.08181	0.0373603	IHW	0.0917875	ashr	-0.282834	0.170011
DAS44	AT1G44100	1443.32	~genotype	Wald	slim1-cr v Col-0	-2.11392	0.0345218	IHW	0.0873911	ashr	-0.264561	0.1518
DAS44	AT1G47128	48880.1	~genotype	Wald	slim1-cr v Col-0	-2.08789	0.0368077	IHW	0.0915686	ashr	-0.288964	0.174484
DAS44	AT1G56650	520.373	~genotype	Wald	slim1-cr v Col-0	-3.0545	0.00225434	IHW	0.0164086	ashr	-0.593983	0.295855
DAS44	AT1G58360	8654.67	~genotype	Wald	slim1-cr v Col-0	-3.36122	0.000775985	IHW	0.00739214	ashr	-0.473976	0.167131
DAS44	AT1G66580	4894.14	~genotype	Wald	slim1-cr v Col-0	0.536324	0.591734	IHW	0.532541	ashr	0.0683853	0.159118
DAS44	AT1G69490	2207.38	~genotype	Wald	slim1-cr v Col-0	-1.04832	0.294492	IHW	0.389539	ashr	-0.167203	0.253103
DAS44	AT1G71190	1224.94	~genotype	Wald	slim1-cr v Col-0	-2.01427	0.0439812	IHW	0.105955	ashr	-0.206663	0.117663
DAS44	AT2G01890	103.685	~genotype	Wald	slim1-cr v Col-0	-0.248453	0.803784	IHW	0.909707	ashr	-0.0379234	0.233646
DAS44	AT2G02990	500.744	~genotype	Wald	slim1-cr v Col-0	-2.31542	0.0205898	IHW	0.0706499	ashr	-0.421131	0.306678
DAS44	AT2G19190	324.854	~genotype	Wald	slim1-cr v Col-0	-3.028	0.00246177	IHW	0.0200851	ashr	-0.591746	0.36638
DAS44	AT2G29350	5761.31	~genotype	Wald	slim1-cr v Col-0	-2.73901	0.00616239	IHW	0.0250251	ashr	-0.509299	0.361825
DAS44	AT2G31260	1393.4	~genotype	Wald	slim1-cr v Col-0	-1.30178	0.192991	IHW	0.289326	ashr	-0.158338	0.147967
DAS44	AT2G35980	194.461	~genotype	Wald	slim1-cr v Col-0	-3.995	6.46956e-05	IHW	0.00173251	ashr	-0.8921	0.392398
DAS44	AT3G06420	676.834	~genotype	Wald	slim1-cr v Col-0	-1.06485	0.286944	IHW	0.441592	ashr	-0.162423	0.216878
DAS44	AT3G19580	1641.6	~genotype	Wald	slim1-cr v Col-0	-3.23364	0.00122223	IHW	0.0100255	ashr	-0.613059	0.265822
DAS44	AT3G20770	13580.5	~genotype	Wald	slim1-cr v Col-0	-2.68995	0.00714628	IHW	0.0316255	ashr	-0.304241	0.131352
DAS44	AT3G44880	8693.87	~genotype	Wald	slim1-cr v Col-0	-3.5238	0.000425411	IHW	0.0050556	ashr	-0.563487	0.194935
DAS44	AT3G49620	610.113	~genotype	Wald	slim1-cr v Col-0	-0.0359153	0.97135	IHW	0.898069	ashr	-0.0038314	0.334986
DAS44	AT3G52780	170.018	~genotype	Wald	slim1-cr v Col-0	0.675701	0.49923	IHW	0.791572	ashr	0.0629488	0.347789
DAS44	AT3G60140	2049.27	~genotype	Wald	slim1-cr v Col-0	-1.15668	0.247404	IHW	0.32775	ashr	-0.149099	0.33472
DAS44	AT4G04620	1511.99	~genotype	Wald	slim1-cr v Col-0	-2.72351	0.00645932	IHW	0.0286187	ashr	-0.36192	0.160432
DAS44	AT4G13250	13910	~genotype	Wald	slim1-cr v Col-0	-1.59379	0.110982	IHW	0.195747	ashr	-0.249109	0.218776
DAS44	AT4G17670	549.898	~genotype	Wald	slim1-cr v Col-0	-3.6154	0.000299881	IHW	0.00499687	ashr	-0.681571	0.251213
DAS44	AT4G21980	2488.23	~genotype	Wald	slim1-cr v Col-0	-1.05318	0.292259	IHW	0.369223	ashr	-0.125796	0.144399
DAS44	AT4G23810	1655.67	~genotype	Wald	slim1-cr v Col-0	-2.68753	0.00719819	IHW	0.0307552	ashr	-0.478954	0.251149
DAS44	AT4G30270	36861.1	~genotype	Wald	slim1-cr v Col-0	-1.9673	0.0491491	IHW	0.111168	ashr	-0.339047	0.263777
DAS44	AT4G37000	1521.53	~genotype	Wald	slim1-cr v Col-0	-2.73464	0.00624481	IHW	0.0286576	ashr	-0.254279	0.103763
DAS44	AT4G39090	54160.2	~genotype	Wald	slim1-cr v Col-0	-1.86075	0.0627789	IHW	0.13151	ashr	-0.2294	0.14965
DAS44	AT5G03280	4447.4	~genotype	Wald	slim1-cr v Col-0	1.2423	0.214126	IHW	0.311084	ashr	0.128085	0.118525
DAS44	AT5G04900	1019.67	~genotype	Wald	slim1-cr v Col-0	1.09187	0.274889	IHW	0.371444	ashr	0.12515	0.136364
DAS44	AT5G11520	3927.07	~genotype	Wald	slim1-cr v Col-0	-0.55832	0.576626	IHW	0.560655	ashr	-0.0664782	0.14378
DAS44	AT5G13080	669.388	~genotype	Wald	slim1-cr v Col-0	-3.33567	0.000850931	IHW	0.00823311	ashr	-0.681826	0.37944
DAS44	AT5G13180	6313.42	~genotype	Wald	slim1-cr v Col-0	-5.17911	2.22952e-07	IHW	4.00837e-05	ashr	-0.743004	0.159833
DAS44	AT5G13800	12132.6	~genotype	Wald	slim1-cr v Col-0	-3.24187	0.00118747	IHW	0.00874575	ashr	-0.523691	0.201661
DAS44	AT5G39610	1323.19	~genotype	Wald	slim1-cr v Col-0	-2.16438	0.0304351	IHW	0.0820812	ashr	-0.3824	0.272493
DAS44	AT5G45890	12366	~genotype	Wald	slim1-cr v Col-0	0.876893	0.380545	IHW	0.414389	ashr	0.0639613	0.360184
DAS44	AT5G45900	1121.16	~genotype	Wald	slim1-cr v Col-0	-2.22111	0.0263433	IHW	0.0760149	ashr	-0.338026	0.199368
DAS44	AT5G59220	1325.51	~genotype	Wald	slim1-cr v Col-0	-3.96399	7.3706e-05	IHW	0.00173124	ashr	-0.725756	0.23211
DAS44	AT1G02220	336.785	~genotype	Wald	35S::SLIM1 #17 v Col-0	-1.48814	0.136715	IHW	0.196924	ashr	-0.282303	0.256224
DAS44	AT1G04120	3401.14	~genotype	Wald	35S::SLIM1 #17 v Col-0	0.893699	0.371483	IHW	0.515912	ashr	0.112251	0.141977
DAS44	AT1G04620	764.83	~genotype	Wald	35S::SLIM1 #17 v Col-0	0.914867	0.360262	IHW	0.566716	ashr	0.0915014	0.107683
DAS44	AT1G19200	206.779	~genotype	Wald	35S::SLIM1 #17 v Col-0	3.13795	0.00170132	IHW	0.00519124	ashr	0.704234	0.291008
DAS44	AT1G21400	3766.28	~genotype	Wald	35S::SLIM1 #17 v Col-0	-0.24541	0.806139	IHW	0.913633	ashr	-0.0351694	0.168952
DAS44	AT1G22160	918.519	~genotype	Wald	35S::SLIM1 #17 v Col-0	11.2778	1.6883e-29	IHW	3.4216e-27	ashr	1.96044	0.178156
DAS44	AT1G44100	1443.32	~genotype	Wald	35S::SLIM1 #17 v Col-0	6.67535	2.46642e-11	IHW	5.44382e-10	ashr	1.02498	0.162336
DAS44	AT1G47128	48880.1	~genotype	Wald	35S::SLIM1 #17 v Col-0	0.591849	0.553952	IHW	0.759852	ashr	0.082955	0.163943
DAS44	AT1G56650	520.373	~genotype	Wald	35S::SLIM1 #17 v Col-0	5.8578	4.6904e-09	IHW	5.57141e-08	ashr	1.80733	0.338009
DAS44	AT1G58360	8654.67	~genotype	Wald	35S::SLIM1 #17 v Col-0	2.02016	0.0433664	IHW	0.101901	ashr	0.281551	0.162836
DAS44	AT1G66580	4894.14	~genotype	Wald	35S::SLIM1 #17 v Col-0	-1.50622	0.132011	IHW	0.228355	ashr	-0.22253	0.176462
DAS44	AT1G69490	2207.38	~genotype	Wald	35S::SLIM1 #17 v Col-0	5.12429	2.98657e-07	IHW	2.72537e-06	ashr	1.67451	0.367787
DAS44	AT1G71190	1224.94	~genotype	Wald	35S::SLIM1 #17 v Col-0	2.75163	0.00592987	IHW	0.0190923	ashr	0.299854	0.119687
DAS44	AT2G01890	103.685	~genotype	Wald	35S::SLIM1 #17 v Col-0	2.44436	0.0145108	IHW	0.033043	ashr	0.593048	0.3471
DAS44	AT2G02990	500.744	~genotype	Wald	35S::SLIM1 #17 v Col-0	5.86666	4.44649e-09	IHW	6.70412e-08	ashr	2.0719	0.39733
DAS44	AT2G19190	324.854	~genotype	Wald	35S::SLIM1 #17 v Col-0	-2.71834	0.00656104	IHW	0.0155336	ashr	-0.878953	0.499228
DAS44	AT2G29350	5761.31	~genotype	Wald	35S::SLIM1 #17 v Col-0	2.56899	0.0101995	IHW	0.027346	ashr	0.830763	0.517184
DAS44	AT2G31260	1393.4	~genotype	Wald	35S::SLIM1 #17 v Col-0	0.572778	0.566795	IHW	0.78354	ashr	0.0743118	0.147881
DAS44	AT2G35980	194.461	~genotype	Wald	35S::SLIM1 #17 v Col-0	-0.687294	0.491897	IHW	0.577465	ashr	-0.140637	0.303587
DAS44	AT3G06420	676.834	~genotype	Wald	35S::SLIM1 #17 v Col-0	0.393039	0.694291	IHW	0.918503	ashr	0.0675173	0.222261
DAS44	AT3G19580	1641.6	~genotype	Wald	35S::SLIM1 #17 v Col-0	4.50174	6.73999e-06	IHW	5.15139e-05	ashr	1.19885	0.307051
DAS44	AT3G20770	13580.5	~genotype	Wald	35S::SLIM1 #17 v Col-0	0.138224	0.890064	IHW	1	ashr	0.0154867	0.122986
DAS44	AT3G44880	8693.87	~genotype	Wald	35S::SLIM1 #17 v Col-0	2.1413	0.0322498	IHW	0.0757881	ashr	0.342119	0.195466
DAS44	AT3G49620	610.113	~genotype	Wald	35S::SLIM1 #17 v Col-0	-3.94399	8.01379e-05	IHW	0.000367848	ashr	-2.52197	1.19326
DAS44	AT3G52780	170.018	~genotype	Wald	35S::SLIM1 #17 v Col-0	3.77718	0.000158613	IHW	0.000667594	ashr	2.46358	1.42744
DAS44	AT3G60140	2049.27	~genotype	Wald	35S::SLIM1 #17 v Col-0	3.15292	0.00161645	IHW	0.00562134	ashr	1.45494	0.827302
DAS44	AT4G04620	1511.99	~genotype	Wald	35S::SLIM1 #17 v Col-0	9.07	1.19022e-19	IHW	7.97378e-18	ashr	1.44576	0.163374
DAS44	AT4G13250	13910	~genotype	Wald	35S::SLIM1 #17 v Col-0	4.20114	2.65575e-05	IHW	0.000154521	ashr	0.989171	0.277835
DAS44	AT4G17670	549.898	~genotype	Wald	35S::SLIM1 #17 v Col-0	3.38598	0.000709235	IHW	0.00248675	ashr	0.76808	0.287845
DAS44	AT4G21980	2488.23	~genotype	Wald	35S::SLIM1 #17 v Col-0	3.36248	0.000772444	IHW	0.00296782	ashr	0.485172	0.166932
DAS44	AT4G23810	1655.67	~genotype	Wald	35S::SLIM1 #17 v Col-0	-0.370247	0.711198	IHW	0.873239	ashr	-0.0636729	0.222697
DAS44	AT4G30270	36861.1	~genotype	Wald	35S::SLIM1 #17 v Col-0	2.36054	0.0182481	IHW	0.0495644	ashr	0.547869	0.328754
DAS44	AT4G37000	1521.53	~genotype	Wald	35S::SLIM1 #17 v Col-0	1.2415	0.214421	IHW	0.354353	ashr	0.116118	0.0997775
DAS44	AT4G39090	54160.2	~genotype	Wald	35S::SLIM1 #17 v Col-0	-0.858052	0.390864	IHW	0.587178	ashr	-0.109733	0.145281
DAS44	AT5G03280	4447.4	~genotype	Wald	35S::SLIM1 #17 v Col-0	5.60452	2.08833e-08	IHW	2.49583e-07	ashr	0.690706	0.132961
DAS44	AT5G04900	1019.67	~genotype	Wald	35S::SLIM1 #17 v Col-0	4.06128	4.88052e-05	IHW	0.000274878	ashr	0.564626	0.15701
DAS44	AT5G11520	3927.07	~genotype	Wald	35S::SLIM1 #17 v Col-0	1.31334	0.189069	IHW	0.301987	ashr	0.176042	0.154707
DAS44	AT5G13080	669.388	~genotype	Wald	35S::SLIM1 #17 v Col-0	0.926381	0.354248	IHW	0.559477	ashr	0.20228	0.340587
DAS44	AT5G13180	6313.42	~genotype	Wald	35S::SLIM1 #17 v Col-0	3.44984	0.00056092	IHW	0.00226503	ashr	0.502562	0.168507
DAS44	AT5G13800	12132.6	~genotype	Wald	35S::SLIM1 #17 v Col-0	2.77209	0.00556977	IHW	0.0181799	ashr	0.480393	0.21414
DAS44	AT5G39610	1323.19	~genotype	Wald	35S::SLIM1 #17 v Col-0	2.46233	0.0138038	IHW	0.0363589	ashr	0.589049	0.339522
DAS44	AT5G45890	12366	~genotype	Wald	35S::SLIM1 #17 v Col-0	2.98241	0.00285986	IHW	0.0101528	ashr	1.26823	1.36914
DAS44	AT5G45900	1121.16	~genotype	Wald	35S::SLIM1 #17 v Col-0	1.23097	0.218333	IHW	0.350435	ashr	0.192151	0.190923
DAS44	AT5G59220	1325.51	~genotype	Wald	35S::SLIM1 #17 v Col-0	2.99795	0.00271803	IHW	0.00915137	ashr	0.605184	0.257762
DAS44	AT1G02220	336.785	~genotype	Wald	35S::SLIM1 #25 v Col-0	0.688736	0.49099	IHW	0.60805	ashr	0.129064	0.23842
DAS44	AT1G04120	3401.14	~genotype	Wald	35S::SLIM1 #25 v Col-0	1.76728	0.0771817	IHW	0.145691	ashr	0.234581	0.147247
DAS44	AT1G04620	764.83	~genotype	Wald	35S::SLIM1 #25 v Col-0	0.206185	0.836646	IHW	1	ashr	0.0212975	0.109196
DAS44	AT1G19200	206.779	~genotype	Wald	35S::SLIM1 #25 v Col-0	5.25992	1.44115e-07	IHW	1.23726e-06	ashr	1.35403	0.279341
DAS44	AT1G21400	3766.28	~genotype	Wald	35S::SLIM1 #25 v Col-0	0.347122	0.728499	IHW	1	ashr	0.0525499	0.173671
DAS44	AT1G22160	918.519	~genotype	Wald	35S::SLIM1 #25 v Col-0	10.5261	6.54862e-26	IHW	3.73093e-24	ashr	1.83805	0.178134
DAS44	AT1G44100	1443.32	~genotype	Wald	35S::SLIM1 #25 v Col-0	7.09366	1.30609e-12	IHW	2.3293e-11	ashr	1.09965	0.161854
DAS44	AT1G47128	48880.1	~genotype	Wald	35S::SLIM1 #25 v Col-0	1.85596	0.0634594	IHW	0.102247	ashr	0.282253	0.175557
DAS44	AT1G56650	520.373	~genotype	Wald	35S::SLIM1 #25 v Col-0	6.53097	6.53461e-11	IHW	1.29065e-09	ashr	2.06393	0.338004
DAS44	AT1G58360	8654.67	~genotype	Wald	35S::SLIM1 #25 v Col-0	3.24252	0.00118477	IHW	0.00324557	ashr	0.486847	0.1725
DAS44	AT1G66580	4894.14	~genotype	Wald	35S::SLIM1 #25 v Col-0	-0.0676832	0.946038	IHW	1	ashr	-0.0101254	0.170888
DAS44	AT1G69490	2207.38	~genotype	Wald	35S::SLIM1 #25 v Col-0	6.31606	2.68316e-10	IHW	3.81221e-09	ashr	2.14439	0.366812
DAS44	AT1G71190	1224.94	~genotype	Wald	35S::SLIM1 #25 v Col-0	2.79946	0.00511885	IHW	0.0140352	ashr	0.310223	0.119084
DAS44	AT2G01890	103.685	~genotype	Wald	35S::SLIM1 #25 v Col-0	4.38983	1.1344e-05	IHW	3.95939e-05	ashr	1.34785	0.352758
DAS44	AT2G02990	500.744	~genotype	Wald	35S::SLIM1 #25 v Col-0	7.06513	1.60471e-12	IHW	3.77561e-11	ashr	2.58023	0.396275
DAS44	AT2G19190	324.854	~genotype	Wald	35S::SLIM1 #25 v Col-0	-1.28026	0.200455	IHW	0.289706	ashr	-0.318879	0.384171
DAS44	AT2G29350	5761.31	~genotype	Wald	35S::SLIM1 #25 v Col-0	4.13714	3.51654e-05	IHW	0.000138962	ashr	1.75619	0.517987
DAS44	AT2G31260	1393.4	~genotype	Wald	35S::SLIM1 #25 v Col-0	2.96182	0.00305831	IHW	0.00818777	ashr	0.426172	0.163688
DAS44	AT2G35980	194.461	~genotype	Wald	35S::SLIM1 #25 v Col-0	0.261802	0.793474	IHW	0.947431	ashr	0.0558607	0.301864
DAS44	AT3G06420	676.834	~genotype	Wald	35S::SLIM1 #25 v Col-0	2.5779	0.00994014	IHW	0.036118	ashr	0.560737	0.285032
DAS44	AT3G19580	1641.6	~genotype	Wald	35S::SLIM1 #25 v Col-0	4.48446	7.31001e-06	IHW	3.45789e-05	ashr	1.21525	0.308833
DAS44	AT3G20770	13580.5	~genotype	Wald	35S::SLIM1 #25 v Col-0	-1.30403	0.192222	IHW	0.256463	ashr	-0.152989	0.12659
DAS44	AT3G44880	8693.87	~genotype	Wald	35S::SLIM1 #25 v Col-0	3.35537	0.00079259	IHW	0.00248601	ashr	0.593674	0.211327
DAS44	AT3G49620	610.113	~genotype	Wald	35S::SLIM1 #25 v Col-0	-2.95567	0.00311995	IHW	0.0132801	ashr	-1.53998	1.01131
DAS44	AT3G52780	170.018	~genotype	Wald	35S::SLIM1 #25 v Col-0	4.36264	1.28502e-05	IHW	7.00467e-05	ashr	3.40633	1.40076
DAS44	AT3G60140	2049.27	~genotype	Wald	35S::SLIM1 #25 v Col-0	4.8013	1.57638e-06	IHW	9.3045e-06	ashr	2.9771	0.829116
DAS44	AT4G04620	1511.99	~genotype	Wald	35S::SLIM1 #25 v Col-0	10.3152	6.01556e-25	IHW	4.27849e-23	ashr	1.65499	0.163315
DAS44	AT4G13250	13910	~genotype	Wald	35S::SLIM1 #25 v Col-0	6.67025	2.55374e-11	IHW	3.38644e-10	ashr	1.67849	0.263925
DAS44	AT4G17670	549.898	~genotype	Wald	35S::SLIM1 #25 v Col-0	4.74066	2.13019e-06	IHW	1.6509e-05	ashr	1.18942	0.280868
DAS44	AT4G21980	2488.23	~genotype	Wald	35S::SLIM1 #25 v Col-0	4.91398	8.92478e-07	IHW	6.61187e-06	ashr	0.757991	0.171823
DAS44	AT4G23810	1655.67	~genotype	Wald	35S::SLIM1 #25 v Col-0	0.982792	0.32571	IHW	0.415866	ashr	0.183886	0.237304
DAS44	AT4G30270	36861.1	~genotype	Wald	35S::SLIM1 #25 v Col-0	1.55699	0.119473	IHW	0.173284	ashr	0.332577	0.290733
DAS44	AT4G37000	1521.53	~genotype	Wald	35S::SLIM1 #25 v Col-0	-0.254914	0.798789	IHW	0.855939	ashr	-0.0244852	0.10071
DAS44	AT4G39090	54160.2	~genotype	Wald	35S::SLIM1 #25 v Col-0	-0.550111	0.582244	IHW	0.639662	ashr	-0.0732576	0.147219
DAS44	AT5G03280	4447.4	~genotype	Wald	35S::SLIM1 #25 v Col-0	5.34361	9.11153e-08	IHW	9.29188e-07	ashr	0.656432	0.133313
DAS44	AT5G04900	1019.67	~genotype	Wald	35S::SLIM1 #25 v Col-0	5.07574	3.85997e-07	IHW	2.63982e-06	ashr	0.730867	0.158988
DAS44	AT5G11520	3927.07	~genotype	Wald	35S::SLIM1 #25 v Col-0	3.72605	0.000194503	IHW	0.0009329	ashr	0.565106	0.173671
DAS44	AT5G13080	669.388	~genotype	Wald	35S::SLIM1 #25 v Col-0	2.95915	0.00308485	IHW	0.013644	ashr	1.03771	0.501644
DAS44	AT5G13180	6313.42	~genotype	Wald	35S::SLIM1 #25 v Col-0	5.53756	3.06721e-08	IHW	2.39355e-07	ashr	0.874274	0.172206
DAS44	AT5G13800	12132.6	~genotype	Wald	35S::SLIM1 #25 v Col-0	3.56536	0.000363353	IHW	0.00114182	ashr	0.663623	0.222962
DAS44	AT5G39610	1323.19	~genotype	Wald	35S::SLIM1 #25 v Col-0	3.68325	0.000230278	IHW	0.000914105	ashr	1.06732	0.359897
DAS44	AT5G45890	12366	~genotype	Wald	35S::SLIM1 #25 v Col-0	3.37097	0.00074903	IHW	0.00224213	ashr	1.96719	1.59643
DAS44	AT5G45900	1121.16	~genotype	Wald	35S::SLIM1 #25 v Col-0	3.51862	0.0004338	IHW	0.00160159	ashr	0.663561	0.22693
DAS44	AT5G59220	1325.51	~genotype	Wald	35S::SLIM1 #25 v Col-0	6.69928	2.0945e-11	IHW	3.40635e-10	ashr	1.59314	0.248711

## Sheet: Figure 3c
timepoint	geneID	baseMean	model	test	contrast	stat	pvalue	padjMethod	padj	lfcModeration	log2FoldChange	lfcSE
DAS37	AT1G02820	176.862	~genotype	Wald	slim1-cr v Col-0	-2.42121	0.015469	IHW	0.0962061	ashr	-0.296867	0.243644
DAS37	AT1G08540	3662.14	~genotype	Wald	slim1-cr v Col-0	1.22763	0.219585	IHW	0.293589	ashr	0.11576	0.131231
DAS37	AT1G15820	145583	~genotype	Wald	slim1-cr v Col-0	1.63705	0.10162	IHW	0.239763	ashr	0.169054	0.177472
DAS37	AT1G19150	2783.12	~genotype	Wald	slim1-cr v Col-0	1.51673	0.129335	IHW	0.273393	ashr	0.154079	0.194975
DAS37	AT1G29910	172437	~genotype	Wald	slim1-cr v Col-0	3.04217	0.00234879	IHW	0.0190574	ashr	0.410264	0.243561
DAS37	AT1G29920	235853	~genotype	Wald	slim1-cr v Col-0	1.83422	0.066621	IHW	0.18921	ashr	0.19493	0.187074
DAS37	AT1G29930	745919	~genotype	Wald	slim1-cr v Col-0	1.55543	0.119844	IHW	0.265071	ashr	0.149698	0.13466
DAS37	AT1G44446	7758.19	~genotype	Wald	slim1-cr v Col-0	0.163687	0.869977	IHW	0.855528	ashr	0.0150714	0.166968
DAS37	AT1G45474	5773.55	~genotype	Wald	slim1-cr v Col-0	0.883392	0.377024	IHW	0.527367	ashr	0.0623302	0.0815428
DAS37	AT1G61520	175622	~genotype	Wald	slim1-cr v Col-0	0.943082	0.345639	IHW	0.488412	ashr	0.0856337	0.121731
DAS37	AT1G64860	4181.79	~genotype	Wald	slim1-cr v Col-0	1.21238	0.225365	IHW	0.379469	ashr	0.116533	0.138936
DAS37	AT1G67090	385159	~genotype	Wald	slim1-cr v Col-0	0.833086	0.404796	IHW	0.541119	ashr	0.0796519	0.16562
DAS37	AT1G79850	8005.8	~genotype	Wald	slim1-cr v Col-0	1.34011	0.180209	IHW	0.323058	ashr	0.133841	0.17303
DAS37	AT2G01110	5736.44	~genotype	Wald	slim1-cr v Col-0	-0.474913	0.634849	IHW	0.704979	ashr	-0.0341758	0.0836728
DAS37	AT2G05070	89654.2	~genotype	Wald	slim1-cr v Col-0	1.73011	0.0836097	IHW	0.216781	ashr	0.181583	0.18952
DAS37	AT2G05100	120016	~genotype	Wald	slim1-cr v Col-0	1.1362	0.255874	IHW	0.422261	ashr	0.111378	0.166645
DAS37	AT2G31400	12318.3	~genotype	Wald	slim1-cr v Col-0	-1.46311	0.143437	IHW	0.291052	ashr	-0.1201	0.100697
DAS37	AT2G34420	273445	~genotype	Wald	slim1-cr v Col-0	0.788345	0.430495	IHW	0.562817	ashr	0.0724494	0.126039
DAS37	AT2G34430	78074.7	~genotype	Wald	slim1-cr v Col-0	1.3156	0.188308	IHW	0.332042	ashr	0.123389	0.227634
DAS37	AT2G36990	3255.55	~genotype	Wald	slim1-cr v Col-0	1.39349	0.163473	IHW	0.314539	ashr	0.138308	0.152827
DAS37	AT2G38040	12161.7	~genotype	Wald	slim1-cr v Col-0	1.55385	0.12022	IHW	0.269869	ashr	0.0853723	0.059958
DAS37	AT2G40100	4293.12	~genotype	Wald	slim1-cr v Col-0	-1.06809	0.28548	IHW	0.383148	ashr	-0.100763	0.133041
DAS37	AT2G47450	13488.8	~genotype	Wald	slim1-cr v Col-0	1.39344	0.163486	IHW	0.305621	ashr	0.135572	0.14122
DAS37	AT3G08940	79127.2	~genotype	Wald	slim1-cr v Col-0	1.95648	0.050409	IHW	0.157947	ashr	0.199764	0.150697
DAS37	AT3G27690	32870.8	~genotype	Wald	slim1-cr v Col-0	3.12448	0.00178117	IHW	0.0162959	ashr	0.5431	0.378947
DAS37	AT3G47470	264163	~genotype	Wald	slim1-cr v Col-0	1.37893	0.167918	IHW	0.32912	ashr	0.133341	0.138809
DAS37	AT3G54890	194182	~genotype	Wald	slim1-cr v Col-0	0.906727	0.364551	IHW	0.517687	ashr	0.0872124	0.14768
DAS37	AT3G61470	132854	~genotype	Wald	slim1-cr v Col-0	1.44264	0.149122	IHW	0.301936	ashr	0.127754	0.114052
DAS37	AT3G62910	1414.92	~genotype	Wald	slim1-cr v Col-0	0.83613	0.403082	IHW	0.66529	ashr	0.0803674	0.152632
DAS37	AT3G63410	13361.6	~genotype	Wald	slim1-cr v Col-0	1.67227	0.0944713	IHW	0.229972	ashr	0.169365	0.154902
DAS37	AT4G10340	209567	~genotype	Wald	slim1-cr v Col-0	2.02617	0.0427471	IHW	0.140114	ashr	0.202946	0.142057
DAS37	AT4G20130	1702.95	~genotype	Wald	slim1-cr v Col-0	1.61439	0.106442	IHW	0.250313	ashr	0.166601	0.184023
DAS37	AT5G13630	65102.9	~genotype	Wald	slim1-cr v Col-0	1.95009	0.0511656	IHW	0.154648	ashr	0.207419	0.174643
DAS37	AT5G13730	955.684	~genotype	Wald	slim1-cr v Col-0	0.454005	0.649825	IHW	0.549887	ashr	0.0428897	0.144798
DAS37	AT5G16390	3346.24	~genotype	Wald	slim1-cr v Col-0	1.25087	0.21098	IHW	0.36589	ashr	0.118588	0.132868
DAS37	AT5G24120	1508.42	~genotype	Wald	slim1-cr v Col-0	-1.87685	0.0605385	IHW	0.175607	ashr	-0.180918	0.131838
DAS37	AT5G35360	7664.78	~genotype	Wald	slim1-cr v Col-0	2.94777	0.0032008	IHW	0.0248362	ashr	0.301967	0.138501
DAS37	AT5G38420	52218.3	~genotype	Wald	slim1-cr v Col-0	1.19229	0.233148	IHW	0.398851	ashr	0.11544	0.188897
DAS37	AT5G38430	45158.5	~genotype	Wald	slim1-cr v Col-0	2.1686	0.0301129	IHW	0.106809	ashr	0.245108	0.206661
DAS37	AT5G54270	194490	~genotype	Wald	slim1-cr v Col-0	1.98949	0.046647	IHW	0.147859	ashr	0.214934	0.184785
DAS37	AT5G64140	2591.84	~genotype	Wald	slim1-cr v Col-0	0.852078	0.394171	IHW	0.526022	ashr	0.0814398	0.143695
DAS37	AT1G02820	176.862	~genotype	Wald	35S::SLIM1 #17 v Col-0	-7.73036	1.07244e-14	IHW	4.43103e-13	ashr	-2.15686	0.296124
DAS37	AT1G08540	3662.14	~genotype	Wald	35S::SLIM1 #17 v Col-0	-3.10542	0.00190011	IHW	0.00682548	ashr	-0.452982	0.166254
DAS37	AT1G15820	145583	~genotype	Wald	35S::SLIM1 #17 v Col-0	-1.82363	0.0682086	IHW	0.12962	ashr	-0.322745	0.227253
DAS37	AT1G19150	2783.12	~genotype	Wald	35S::SLIM1 #17 v Col-0	-3.2042	0.0013544	IHW	0.00514141	ashr	-0.726027	0.305202
DAS37	AT1G29910	172437	~genotype	Wald	35S::SLIM1 #17 v Col-0	-0.0948969	0.924397	IHW	0.870213	ashr	-0.0146896	0.191612
DAS37	AT1G29920	235853	~genotype	Wald	35S::SLIM1 #17 v Col-0	0.0377759	0.969866	IHW	0.982922	ashr	0.00609746	0.203819
DAS37	AT1G29930	745919	~genotype	Wald	35S::SLIM1 #17 v Col-0	-0.336361	0.736598	IHW	0.811444	ashr	-0.0426194	0.147151
DAS37	AT1G44446	7758.19	~genotype	Wald	35S::SLIM1 #17 v Col-0	-1.09164	0.27499	IHW	0.393395	ashr	-0.198186	0.244055
DAS37	AT1G45474	5773.55	~genotype	Wald	35S::SLIM1 #17 v Col-0	-2.60812	0.00910422	IHW	0.0226813	ashr	-0.221299	0.0914585
DAS37	AT1G61520	175622	~genotype	Wald	35S::SLIM1 #17 v Col-0	-0.934502	0.350045	IHW	0.473371	ashr	-0.114336	0.141415
DAS37	AT1G64860	4181.79	~genotype	Wald	35S::SLIM1 #17 v Col-0	-1.20367	0.228716	IHW	0.340412	ashr	-0.168784	0.167655
DAS37	AT1G67090	385159	~genotype	Wald	35S::SLIM1 #17 v Col-0	-2.36309	0.0181235	IHW	0.0441209	ashr	-0.458107	0.253303
DAS37	AT1G79850	8005.8	~genotype	Wald	35S::SLIM1 #17 v Col-0	-2.33838	0.0193675	IHW	0.0465261	ashr	-0.44303	0.24481
DAS37	AT2G01110	5736.44	~genotype	Wald	35S::SLIM1 #17 v Col-0	-3.72249	0.000197268	IHW	0.000894814	ashr	-0.337266	0.0962553
DAS37	AT2G05070	89654.2	~genotype	Wald	35S::SLIM1 #17 v Col-0	-0.88471	0.376313	IHW	0.498871	ashr	-0.150758	0.220826
DAS37	AT2G05100	120016	~genotype	Wald	35S::SLIM1 #17 v Col-0	-1.97787	0.0479431	IHW	0.0975855	ashr	-0.35953	0.234761
DAS37	AT2G31400	12318.3	~genotype	Wald	35S::SLIM1 #17 v Col-0	-4.94932	7.44719e-07	IHW	7.29222e-06	ashr	-0.536323	0.114471
DAS37	AT2G34420	273445	~genotype	Wald	35S::SLIM1 #17 v Col-0	-0.910621	0.362495	IHW	0.485812	ashr	-0.116747	0.149774
DAS37	AT2G34430	78074.7	~genotype	Wald	35S::SLIM1 #17 v Col-0	-0.786447	0.431606	IHW	0.552533	ashr	-0.156345	0.305476
DAS37	AT2G36990	3255.55	~genotype	Wald	35S::SLIM1 #17 v Col-0	-2.84186	0.00448519	IHW	0.0167718	ashr	-0.482029	0.203487
DAS37	AT2G38040	12161.7	~genotype	Wald	35S::SLIM1 #17 v Col-0	2.93622	0.00332239	IHW	0.0108861	ashr	0.17683	0.0628934
DAS37	AT2G40100	4293.12	~genotype	Wald	35S::SLIM1 #17 v Col-0	-1.97281	0.048517	IHW	0.0985663	ashr	-0.280488	0.168158
DAS37	AT2G47450	13488.8	~genotype	Wald	35S::SLIM1 #17 v Col-0	-0.751452	0.45238	IHW	0.572103	ashr	-0.102725	0.162301
DAS37	AT3G08940	79127.2	~genotype	Wald	35S::SLIM1 #17 v Col-0	0.490895	0.623501	IHW	0.660644	ashr	0.0665583	0.160405
DAS37	AT3G27690	32870.8	~genotype	Wald	35S::SLIM1 #17 v Col-0	1.2394	0.215198	IHW	0.294514	ashr	0.235573	0.263568
DAS37	AT3G47470	264163	~genotype	Wald	35S::SLIM1 #17 v Col-0	-0.507288	0.611953	IHW	0.71259	ashr	-0.0676046	0.156924
DAS37	AT3G54890	194182	~genotype	Wald	35S::SLIM1 #17 v Col-0	-2.11282	0.0346158	IHW	0.0748346	ashr	-0.347467	0.202036
DAS37	AT3G61470	132854	~genotype	Wald	35S::SLIM1 #17 v Col-0	-0.596253	0.551006	IHW	0.602391	ashr	-0.0650697	0.123043
DAS37	AT3G62910	1414.92	~genotype	Wald	35S::SLIM1 #17 v Col-0	-3.3301	0.000868142	IHW	0.00352422	ashr	-0.623034	0.228047
DAS37	AT3G63410	13361.6	~genotype	Wald	35S::SLIM1 #17 v Col-0	-2.42418	0.0153432	IHW	0.0348755	ashr	-0.391983	0.194724
DAS37	AT4G10340	209567	~genotype	Wald	35S::SLIM1 #17 v Col-0	-0.97373	0.330191	IHW	0.453048	ashr	-0.12714	0.153247
DAS37	AT4G20130	1702.95	~genotype	Wald	35S::SLIM1 #17 v Col-0	-2.79985	0.0051126	IHW	0.0155839	ashr	-0.560086	0.258417
DAS37	AT5G13630	65102.9	~genotype	Wald	35S::SLIM1 #17 v Col-0	-1.10667	0.268438	IHW	0.349516	ashr	-0.174381	0.196089
DAS37	AT5G13730	955.684	~genotype	Wald	35S::SLIM1 #17 v Col-0	-2.30592	0.0211151	IHW	0.0499448	ashr	-0.389001	0.207291
DAS37	AT5G16390	3346.24	~genotype	Wald	35S::SLIM1 #17 v Col-0	-1.09125	0.275163	IHW	0.393544	ashr	-0.14449	0.155958
DAS37	AT5G24120	1508.42	~genotype	Wald	35S::SLIM1 #17 v Col-0	-6.43351	1.24694e-10	IHW	3.30874e-09	ashr	-0.955634	0.163269
DAS37	AT5G35360	7664.78	~genotype	Wald	35S::SLIM1 #17 v Col-0	-0.584317	0.559007	IHW	0.608495	ashr	-0.068292	0.133509
DAS37	AT5G38420	52218.3	~genotype	Wald	35S::SLIM1 #17 v Col-0	-3.55287	0.000381048	IHW	0.00157422	ashr	-0.875377	0.336559
DAS37	AT5G38430	45158.5	~genotype	Wald	35S::SLIM1 #17 v Col-0	-3.75282	0.000174856	IHW	0.000899184	ashr	-0.792466	0.266061
DAS37	AT5G54270	194490	~genotype	Wald	35S::SLIM1 #17 v Col-0	-1.53873	0.12387	IHW	0.209959	ashr	-0.259475	0.214034
DAS37	AT5G64140	2591.84	~genotype	Wald	35S::SLIM1 #17 v Col-0	-2.51974	0.0117442	IHW	0.0310653	ashr	-0.414208	0.198127
DAS37	AT1G02820	176.862	~genotype	Wald	35S::SLIM1 #25 v Col-0	-2.96958	0.00298208	IHW	0.0109031	ashr	-0.583944	0.310101
DAS37	AT1G08540	3662.14	~genotype	Wald	35S::SLIM1 #25 v Col-0	-0.428417	0.668348	IHW	0.850232	ashr	-0.0371435	0.123216
DAS37	AT1G15820	145583	~genotype	Wald	35S::SLIM1 #25 v Col-0	1.5165	0.129392	IHW	0.377496	ashr	0.186251	0.206657
DAS37	AT1G19150	2783.12	~genotype	Wald	35S::SLIM1 #25 v Col-0	0.501121	0.616286	IHW	0.967781	ashr	0.0548081	0.187241
DAS37	AT1G29910	172437	~genotype	Wald	35S::SLIM1 #25 v Col-0	2.09316	0.036335	IHW	0.140128	ashr	0.289485	0.226038
DAS37	AT1G29920	235853	~genotype	Wald	35S::SLIM1 #25 v Col-0	3.23803	0.00120357	IHW	0.0076737	ashr	0.621069	0.279441
DAS37	AT1G29930	745919	~genotype	Wald	35S::SLIM1 #25 v Col-0	1.94177	0.0521644	IHW	0.195445	ashr	0.211025	0.160148
DAS37	AT1G44446	7758.19	~genotype	Wald	35S::SLIM1 #25 v Col-0	2.08096	0.0374377	IHW	0.12375	ashr	0.326657	0.280576
DAS37	AT1G45474	5773.55	~genotype	Wald	35S::SLIM1 #25 v Col-0	0.234097	0.81491	IHW	1	ashr	0.014326	0.0753561
DAS37	AT1G61520	175622	~genotype	Wald	35S::SLIM1 #25 v Col-0	1.27926	0.200807	IHW	0.507163	ashr	0.117361	0.131482
DAS37	AT1G64860	4181.79	~genotype	Wald	35S::SLIM1 #25 v Col-0	2.55667	0.0105681	IHW	0.0407538	ashr	0.336022	0.192134
DAS37	AT1G67090	385159	~genotype	Wald	35S::SLIM1 #25 v Col-0	-0.252305	0.800805	IHW	1	ashr	-0.0261374	0.169109
DAS37	AT1G79850	8005.8	~genotype	Wald	35S::SLIM1 #25 v Col-0	-0.603181	0.546388	IHW	0.887569	ashr	-0.063512	0.172066
DAS37	AT2G01110	5736.44	~genotype	Wald	35S::SLIM1 #25 v Col-0	-0.654848	0.512565	IHW	0.707505	ashr	-0.042097	0.0805195
DAS37	AT2G05070	89654.2	~genotype	Wald	35S::SLIM1 #25 v Col-0	2.6068	0.00913926	IHW	0.0362716	ashr	0.450036	0.282113
DAS37	AT2G05100	120016	~genotype	Wald	35S::SLIM1 #25 v Col-0	1.93345	0.053181	IHW	0.198332	ashr	0.268578	0.235697
DAS37	AT2G31400	12318.3	~genotype	Wald	35S::SLIM1 #25 v Col-0	-1.82686	0.067721	IHW	0.224526	ashr	-0.150634	0.109468
DAS37	AT2G34420	273445	~genotype	Wald	35S::SLIM1 #25 v Col-0	2.43934	0.0147141	IHW	0.0595411	ashr	0.289741	0.170108
DAS37	AT2G34430	78074.7	~genotype	Wald	35S::SLIM1 #25 v Col-0	1.77437	0.0760025	IHW	0.191258	ashr	0.289588	0.345869
DAS37	AT2G36990	3255.55	~genotype	Wald	35S::SLIM1 #25 v Col-0	-0.137163	0.890902	IHW	1	ashr	-0.0128815	0.141039
DAS37	AT2G38040	12161.7	~genotype	Wald	35S::SLIM1 #25 v Col-0	2.93703	0.00331367	IHW	0.0206756	ashr	0.164338	0.0635508
DAS37	AT2G40100	4293.12	~genotype	Wald	35S::SLIM1 #25 v Col-0	-0.0794957	0.936638	IHW	1	ashr	-0.00692397	0.124327
DAS37	AT2G47450	13488.8	~genotype	Wald	35S::SLIM1 #25 v Col-0	0.42152	0.673376	IHW	0.911337	ashr	0.0380465	0.1315
DAS37	AT3G08940	79127.2	~genotype	Wald	35S::SLIM1 #25 v Col-0	3.27717	0.00104851	IHW	0.00838316	ashr	0.486804	0.199597
DAS37	AT3G27690	32870.8	~genotype	Wald	35S::SLIM1 #25 v Col-0	4.06204	4.8646e-05	IHW	0.000590685	ashr	1.09198	0.367509
DAS37	AT3G47470	264163	~genotype	Wald	35S::SLIM1 #25 v Col-0	2.42102	0.0154771	IHW	0.0619875	ashr	0.304118	0.184462
DAS37	AT3G54890	194182	~genotype	Wald	35S::SLIM1 #25 v Col-0	0.655085	0.512413	IHW	0.89432	ashr	0.0642945	0.150779
DAS37	AT3G61470	132854	~genotype	Wald	35S::SLIM1 #25 v Col-0	1.34316	0.179219	IHW	0.470805	ashr	0.114812	0.118099
DAS37	AT3G62910	1414.92	~genotype	Wald	35S::SLIM1 #25 v Col-0	-0.338495	0.73499	IHW	0.941443	ashr	-0.0332668	0.152581
DAS37	AT3G63410	13361.6	~genotype	Wald	35S::SLIM1 #25 v Col-0	-0.0248207	0.980198	IHW	1	ashr	-0.00229672	0.137514
DAS37	AT4G10340	209567	~genotype	Wald	35S::SLIM1 #25 v Col-0	1.71247	0.0868093	IHW	0.234105	ashr	0.178791	0.154735
DAS37	AT4G20130	1702.95	~genotype	Wald	35S::SLIM1 #25 v Col-0	-0.241496	0.809171	IHW	0.831432	ashr	-0.0248986	0.167546
DAS37	AT5G13630	65102.9	~genotype	Wald	35S::SLIM1 #25 v Col-0	1.88441	0.0595091	IHW	0.203788	ashr	0.240866	0.207389
DAS37	AT5G13730	955.684	~genotype	Wald	35S::SLIM1 #25 v Col-0	-0.510219	0.609898	IHW	0.658852	ashr	-0.0496853	0.14943
DAS37	AT5G16390	3346.24	~genotype	Wald	35S::SLIM1 #25 v Col-0	0.104174	0.917032	IHW	1	ashr	0.00897991	0.122272
DAS37	AT5G24120	1508.42	~genotype	Wald	35S::SLIM1 #25 v Col-0	-1.11432	0.265142	IHW	0.463007	ashr	-0.100295	0.128683
DAS37	AT5G35360	7664.78	~genotype	Wald	35S::SLIM1 #25 v Col-0	1.01142	0.311818	IHW	0.576998	ashr	0.0870935	0.120762
DAS37	AT5G38420	52218.3	~genotype	Wald	35S::SLIM1 #25 v Col-0	-1.14099	0.253873	IHW	0.561665	ashr	-0.141024	0.224224
DAS37	AT5G38430	45158.5	~genotype	Wald	35S::SLIM1 #25 v Col-0	-2.10825	0.0350092	IHW	0.144695	ashr	-0.309901	0.248716
DAS37	AT5G54270	194490	~genotype	Wald	35S::SLIM1 #25 v Col-0	1.75352	0.079513	IHW	0.219149	ashr	0.224015	0.212186
DAS37	AT5G64140	2591.84	~genotype	Wald	35S::SLIM1 #25 v Col-0	-1.28589	0.198481	IHW	0.382983	ashr	-0.136758	0.166119
DAS44	AT1G02820	77.4334	~genotype	Wald	slim1-cr v Col-0	-2.32399	0.0201262	IHW	0.0693546	ashr	-0.406428	0.254789
DAS44	AT1G08540	2720.07	~genotype	Wald	slim1-cr v Col-0	3.20362	0.00135711	IHW	0.0104491	ashr	0.332315	0.116932
DAS44	AT1G15820	85367.6	~genotype	Wald	slim1-cr v Col-0	3.65969	0.000252518	IHW	0.00323825	ashr	0.553178	0.179419
DAS44	AT1G19150	1823.36	~genotype	Wald	slim1-cr v Col-0	1.84453	0.0651062	IHW	0.140209	ashr	0.257906	0.17891
DAS44	AT1G29910	100232	~genotype	Wald	slim1-cr v Col-0	3.57273	0.000353282	IHW	0.00443912	ashr	0.643231	0.232168
DAS44	AT1G29920	166084	~genotype	Wald	slim1-cr v Col-0	1.6782	0.093309	IHW	0.153943	ashr	0.264794	0.221289
DAS44	AT1G29930	532864	~genotype	Wald	slim1-cr v Col-0	1.61291	0.106765	IHW	0.198153	ashr	0.225482	0.180435
DAS44	AT1G44446	4868.3	~genotype	Wald	slim1-cr v Col-0	2.83488	0.00458427	IHW	0.0231896	ashr	0.375164	0.158735
DAS44	AT1G45474	4774.45	~genotype	Wald	slim1-cr v Col-0	0.43244	0.665422	IHW	0.69149	ashr	0.0444999	0.117913
DAS44	AT1G61520	142598	~genotype	Wald	slim1-cr v Col-0	1.03887	0.298864	IHW	0.394527	ashr	0.12306	0.142727
DAS44	AT1G64860	2902.2	~genotype	Wald	slim1-cr v Col-0	5.55419	2.78908e-08	IHW	9.12243e-06	ashr	0.456778	0.0865029
DAS44	AT1G67090	179362	~genotype	Wald	slim1-cr v Col-0	3.55612	0.000376368	IHW	0.00467601	ashr	0.484602	0.158621
DAS44	AT1G79850	4552.72	~genotype	Wald	slim1-cr v Col-0	3.25571	0.0011311	IHW	0.00854645	ashr	0.486418	0.181076
DAS44	AT2G01110	4927.38	~genotype	Wald	slim1-cr v Col-0	-1.24512	0.213089	IHW	0.309625	ashr	-0.113282	0.101296
DAS44	AT2G05070	60392.7	~genotype	Wald	slim1-cr v Col-0	2.35768	0.0183895	IHW	0.0573652	ashr	0.369968	0.207083
DAS44	AT2G05100	78670.9	~genotype	Wald	slim1-cr v Col-0	1.45386	0.145986	IHW	0.24672	ashr	0.203736	0.182098
DAS44	AT2G31400	8511.25	~genotype	Wald	slim1-cr v Col-0	-0.487545	0.625872	IHW	0.664486	ashr	-0.0413531	0.0928021
DAS44	AT2G34420	254707	~genotype	Wald	slim1-cr v Col-0	0.769977	0.441313	IHW	0.520559	ashr	0.0926695	0.146017
DAS44	AT2G34430	77329	~genotype	Wald	slim1-cr v Col-0	1.75294	0.0796118	IHW	0.154956	ashr	0.299147	0.289005
DAS44	AT2G36990	1977.51	~genotype	Wald	slim1-cr v Col-0	3.20235	0.00136311	IHW	0.0104764	ashr	0.443117	0.164684
DAS44	AT2G38040	12796	~genotype	Wald	slim1-cr v Col-0	2.73336	0.00626924	IHW	0.0281497	ashr	0.238949	0.0965042
DAS44	AT2G40100	2459.03	~genotype	Wald	slim1-cr v Col-0	-0.491109	0.62335	IHW	0.662072	ashr	-0.0476881	0.109506
DAS44	AT2G47450	11188.7	~genotype	Wald	slim1-cr v Col-0	3.93799	8.2166e-05	IHW	0.00159496	ashr	0.458382	0.130052
DAS44	AT3G08940	72992.9	~genotype	Wald	slim1-cr v Col-0	2.82537	0.00472256	IHW	0.0235945	ashr	0.422776	0.186663
DAS44	AT3G27690	23803.2	~genotype	Wald	slim1-cr v Col-0	4.05571	4.9982e-05	IHW	0.00130326	ashr	0.684366	0.203784
DAS44	AT3G47470	231739	~genotype	Wald	slim1-cr v Col-0	2.04603	0.0407534	IHW	0.10167	ashr	0.265024	0.159332
DAS44	AT3G54890	157004	~genotype	Wald	slim1-cr v Col-0	1.7095	0.0873579	IHW	0.172175	ashr	0.229531	0.169313
DAS44	AT3G61470	125563	~genotype	Wald	slim1-cr v Col-0	0.39226	0.694866	IHW	0.714589	ashr	0.0475007	0.147311
DAS44	AT3G62910	1123.85	~genotype	Wald	slim1-cr v Col-0	3.04591	0.00231977	IHW	0.0146454	ashr	0.451638	0.181705
DAS44	AT3G63410	8229.91	~genotype	Wald	slim1-cr v Col-0	3.96179	7.43908e-05	IHW	0.00167227	ashr	0.50205	0.143018
DAS44	AT4G10340	169666	~genotype	Wald	slim1-cr v Col-0	2.05355	0.0400192	IHW	0.0967014	ashr	0.259381	0.15394
DAS44	AT4G20130	1109.86	~genotype	Wald	slim1-cr v Col-0	2.85622	0.00428724	IHW	0.0221759	ashr	0.450722	0.200815
DAS44	AT5G13630	48138.6	~genotype	Wald	slim1-cr v Col-0	3.50086	0.000463761	IHW	0.00537533	ashr	0.375692	0.120529
DAS44	AT5G13730	555.984	~genotype	Wald	slim1-cr v Col-0	5.483	4.18181e-08	IHW	1.30342e-05	ashr	0.659731	0.12974
DAS44	AT5G16390	2124.2	~genotype	Wald	slim1-cr v Col-0	3.12679	0.00176724	IHW	0.0123493	ashr	0.390143	0.145655
DAS44	AT5G24120	1256.15	~genotype	Wald	slim1-cr v Col-0	-2.76707	0.00565626	IHW	0.0264623	ashr	-0.410736	0.185322
DAS44	AT5G35360	5121.53	~genotype	Wald	slim1-cr v Col-0	4.70571	2.5299e-06	IHW	0.000198897	ashr	0.663823	0.15808
DAS44	AT5G38420	31186.1	~genotype	Wald	slim1-cr v Col-0	1.66003	0.0969082	IHW	0.17874	ashr	0.253018	0.207583
DAS44	AT5G38430	11979.6	~genotype	Wald	slim1-cr v Col-0	3.68839	0.000225675	IHW	0.00302996	ashr	0.678696	0.238759
DAS44	AT5G54270	127102	~genotype	Wald	slim1-cr v Col-0	2.57532	0.0100147	IHW	0.0382059	ashr	0.390309	0.193337
DAS44	AT5G64140	1527.43	~genotype	Wald	slim1-cr v Col-0	2.42439	0.015334	IHW	0.0509856	ashr	0.365427	0.193788
DAS44	AT1G02820	77.4334	~genotype	Wald	35S::SLIM1 #17 v Col-0	-5.85149	4.87191e-09	IHW	4.95798e-08	ashr	-1.67614	0.310809
DAS44	AT1G08540	2720.07	~genotype	Wald	35S::SLIM1 #17 v Col-0	-7.16264	7.91374e-13	IHW	1.96043e-11	ashr	-0.825837	0.121138
DAS44	AT1G15820	85367.6	~genotype	Wald	35S::SLIM1 #17 v Col-0	-9.61808	6.70744e-22	IHW	6.37169e-20	ashr	-1.74973	0.186982
DAS44	AT1G19150	1823.36	~genotype	Wald	35S::SLIM1 #17 v Col-0	-13.0424	7.02439e-39	IHW	3.50864e-36	ashr	-2.57045	0.203599
DAS44	AT1G29910	100232	~genotype	Wald	35S::SLIM1 #17 v Col-0	-6.09753	1.07721e-09	IHW	1.61234e-08	ashr	-1.44504	0.252649
DAS44	AT1G29920	166084	~genotype	Wald	35S::SLIM1 #17 v Col-0	-13.375	8.46335e-41	IHW	4.34825e-38	ashr	-3.48792	0.271391
DAS44	AT1G29930	532864	~genotype	Wald	35S::SLIM1 #17 v Col-0	-6.82981	8.50265e-12	IHW	1.99281e-10	ashr	-1.34233	0.206044
DAS44	AT1G44446	4868.3	~genotype	Wald	35S::SLIM1 #17 v Col-0	-8.16841	3.12477e-16	IHW	1.22338e-14	ashr	-1.30583	0.164885
DAS44	AT1G45474	4774.45	~genotype	Wald	35S::SLIM1 #17 v Col-0	-7.35558	1.90103e-13	IHW	5.22393e-12	ashr	-0.958984	0.136535
DAS44	AT1G61520	142598	~genotype	Wald	35S::SLIM1 #17 v Col-0	-8.23814	1.74915e-16	IHW	7.30147e-15	ashr	-1.31075	0.164002
DAS44	AT1G64860	2902.2	~genotype	Wald	35S::SLIM1 #17 v Col-0	-5.41158	6.24725e-08	IHW	6.35882e-07	ashr	-0.452965	0.0880299
DAS44	AT1G67090	179362	~genotype	Wald	35S::SLIM1 #17 v Col-0	-9.094	9.54606e-20	IHW	7.14505e-18	ashr	-1.4457	0.162911
DAS44	AT1G79850	4552.72	~genotype	Wald	35S::SLIM1 #17 v Col-0	-4.52495	6.04091e-06	IHW	4.09007e-05	ashr	-0.783501	0.197065
DAS44	AT2G01110	4927.38	~genotype	Wald	35S::SLIM1 #17 v Col-0	-8.3733	5.60273e-17	IHW	2.484e-15	ashr	-0.897284	0.111052
DAS44	AT2G05070	60392.7	~genotype	Wald	35S::SLIM1 #17 v Col-0	-12.3552	4.56782e-35	IHW	1.40158e-32	ashr	-2.73272	0.230407
DAS44	AT2G05100	78670.9	~genotype	Wald	35S::SLIM1 #17 v Col-0	-13.6511	1.98978e-42	IHW	1.3065e-39	ashr	-2.83026	0.214788
DAS44	AT2G31400	8511.25	~genotype	Wald	35S::SLIM1 #17 v Col-0	-1.36704	0.171614	IHW	0.281969	ashr	-0.123875	0.0962854
DAS44	AT2G34420	254707	~genotype	Wald	35S::SLIM1 #17 v Col-0	-9.98749	1.72898e-23	IHW	1.94289e-21	ashr	-1.67072	0.171239
DAS44	AT2G34430	77329	~genotype	Wald	35S::SLIM1 #17 v Col-0	-11.1821	4.99168e-29	IHW	8.61544e-27	ashr	-4.4376	0.412334
DAS44	AT2G36990	1977.51	~genotype	Wald	35S::SLIM1 #17 v Col-0	-4.6384	3.51121e-06	IHW	2.6171e-05	ashr	-0.729268	0.17684
DAS44	AT2G38040	12796	~genotype	Wald	35S::SLIM1 #17 v Col-0	-1.53893	0.12382	IHW	0.216671	ashr	-0.136928	0.0943633
DAS44	AT2G40100	2459.03	~genotype	Wald	35S::SLIM1 #17 v Col-0	-6.85246	7.2591e-12	IHW	1.49435e-10	ashr	-0.8139	0.125373
DAS44	AT2G47450	11188.7	~genotype	Wald	35S::SLIM1 #17 v Col-0	-4.842	1.28537e-06	IHW	1.02553e-05	ashr	-0.596443	0.134795
DAS44	AT3G08940	72992.9	~genotype	Wald	35S::SLIM1 #17 v Col-0	-7.39438	1.4207e-13	IHW	3.98307e-12	ashr	-1.39782	0.19657
DAS44	AT3G27690	23803.2	~genotype	Wald	35S::SLIM1 #17 v Col-0	-13.8024	2.46413e-43	IHW	1.63894e-40	ashr	-2.94458	0.221271
DAS44	AT3G47470	231739	~genotype	Wald	35S::SLIM1 #17 v Col-0	-8.56551	1.076e-17	IHW	6.00431e-16	ashr	-1.42366	0.1709
DAS44	AT3G54890	157004	~genotype	Wald	35S::SLIM1 #17 v Col-0	-9.55316	1.25797e-21	IHW	1.09956e-19	ashr	-1.74786	0.188117
DAS44	AT3G61470	125563	~genotype	Wald	35S::SLIM1 #17 v Col-0	-6.69976	2.08765e-11	IHW	4.68425e-10	ashr	-1.14113	0.179471
DAS44	AT3G62910	1123.85	~genotype	Wald	35S::SLIM1 #17 v Col-0	-3.94064	8.12638e-05	IHW	0.000461207	ashr	-0.670319	0.198649
DAS44	AT3G63410	8229.91	~genotype	Wald	35S::SLIM1 #17 v Col-0	-4.51632	6.29227e-06	IHW	4.53844e-05	ashr	-0.60926	0.150054
DAS44	AT4G10340	169666	~genotype	Wald	35S::SLIM1 #17 v Col-0	-8.53619	1.38719e-17	IHW	7.24287e-16	ashr	-1.36687	0.164643
DAS44	AT4G20130	1109.86	~genotype	Wald	35S::SLIM1 #17 v Col-0	-3.5927	0.000327269	IHW	0.00156957	ashr	-0.668013	0.224255
DAS44	AT5G13630	48138.6	~genotype	Wald	35S::SLIM1 #17 v Col-0	-16.0245	8.61547e-58	IHW	2.71908e-54	ashr	-1.92816	0.121722
DAS44	AT5G13730	555.984	~genotype	Wald	35S::SLIM1 #17 v Col-0	-3.12053	0.00180528	IHW	0.00645403	ashr	-0.376275	0.134862
DAS44	AT5G16390	2124.2	~genotype	Wald	35S::SLIM1 #17 v Col-0	-3.44108	0.000579399	IHW	0.00223611	ashr	-0.455095	0.150069
DAS44	AT5G24120	1256.15	~genotype	Wald	35S::SLIM1 #17 v Col-0	-6.15724	7.40218e-10	IHW	1.1743e-08	ashr	-1.14803	0.198732
DAS44	AT5G35360	5121.53	~genotype	Wald	35S::SLIM1 #17 v Col-0	-2.42053	0.0154978	IHW	0.0387033	ashr	-0.332264	0.15925
DAS44	AT5G38420	31186.1	~genotype	Wald	35S::SLIM1 #17 v Col-0	-11.4303	2.95166e-30	IHW	5.87468e-28	ashr	-2.70948	0.248508
DAS44	AT5G38430	11979.6	~genotype	Wald	35S::SLIM1 #17 v Col-0	-2.67356	0.00750512	IHW	0.0234017	ashr	-0.540244	0.264038
DAS44	AT5G54270	127102	~genotype	Wald	35S::SLIM1 #17 v Col-0	-11.0047	3.62856e-28	IHW	6.07626e-26	ashr	-2.20628	0.207277
DAS44	AT5G64140	1527.43	~genotype	Wald	35S::SLIM1 #17 v Col-0	-0.863712	0.387746	IHW	0.559477	ashr	-0.1294	0.180042
DAS44	AT1G02820	77.4334	~genotype	Wald	35S::SLIM1 #25 v Col-0	-6.1059	1.02225e-09	IHW	9.23209e-09	ashr	-1.79761	0.313942
DAS44	AT1G08540	2720.07	~genotype	Wald	35S::SLIM1 #25 v Col-0	-7.58798	3.24935e-14	IHW	7.07188e-13	ashr	-0.881678	0.121474
DAS44	AT1G15820	85367.6	~genotype	Wald	35S::SLIM1 #25 v Col-0	-13.1244	2.38726e-39	IHW	5.9891e-37	ashr	-2.41571	0.18773
DAS44	AT1G19150	1823.36	~genotype	Wald	35S::SLIM1 #25 v Col-0	-16.6254	4.56292e-62	IHW	6.10217e-59	ashr	-3.34582	0.205282
DAS44	AT1G29910	100232	~genotype	Wald	35S::SLIM1 #25 v Col-0	-10.295	7.42264e-25	IHW	4.88183e-23	ashr	-2.51651	0.253098
DAS44	AT1G29920	166084	~genotype	Wald	35S::SLIM1 #25 v Col-0	-16.5401	1.88799e-61	IHW	2.34272e-58	ashr	-4.32677	0.269416
DAS44	AT1G29930	532864	~genotype	Wald	35S::SLIM1 #25 v Col-0	-11.1058	1.17529e-28	IHW	1.08707e-26	ashr	-2.22819	0.205604
DAS44	AT1G44446	4868.3	~genotype	Wald	35S::SLIM1 #25 v Col-0	-9.33406	1.01888e-20	IHW	6.32767e-19	ashr	-1.50579	0.16457
DAS44	AT1G45474	4774.45	~genotype	Wald	35S::SLIM1 #25 v Col-0	-7.91093	2.55464e-15	IHW	8.46537e-14	ashr	-1.04034	0.136271
DAS44	AT1G61520	142598	~genotype	Wald	35S::SLIM1 #25 v Col-0	-10.8837	1.37853e-27	IHW	1.21346e-25	ashr	-1.74951	0.163534
DAS44	AT1G64860	2902.2	~genotype	Wald	35S::SLIM1 #25 v Col-0	-6.84207	7.80588e-12	IHW	1.42121e-10	ashr	-0.581779	0.0887636
DAS44	AT1G67090	179362	~genotype	Wald	35S::SLIM1 #25 v Col-0	-12.0624	1.6683e-33	IHW	2.37036e-31	ashr	-1.93522	0.163085
DAS44	AT1G79850	4552.72	~genotype	Wald	35S::SLIM1 #25 v Col-0	-5.98814	2.12254e-09	IHW	2.26735e-08	ashr	-1.08693	0.193759
DAS44	AT2G01110	4927.38	~genotype	Wald	35S::SLIM1 #25 v Col-0	-8.78304	1.59119e-18	IHW	6.1861e-17	ashr	-0.946371	0.11115
DAS44	AT2G05070	60392.7	~genotype	Wald	35S::SLIM1 #25 v Col-0	-16.8304	1.46038e-63	IHW	2.25932e-60	ashr	-3.76325	0.228795
DAS44	AT2G05100	78670.9	~genotype	Wald	35S::SLIM1 #25 v Col-0	-16.9458	2.06804e-64	IHW	3.49028e-61	ashr	-3.53553	0.212996
DAS44	AT2G31400	8511.25	~genotype	Wald	35S::SLIM1 #25 v Col-0	0.56561	0.571659	IHW	0.612911	ashr	0.0524103	0.0968201
DAS44	AT2G34420	254707	~genotype	Wald	35S::SLIM1 #25 v Col-0	-13.761	4.37558e-43	IHW	1.50818e-40	ashr	-2.32517	0.171842
DAS44	AT2G34430	77329	~genotype	Wald	35S::SLIM1 #25 v Col-0	-14.4325	3.22919e-47	IHW	1.52839e-44	ashr	-5.80297	0.420115
DAS44	AT2G36990	1977.51	~genotype	Wald	35S::SLIM1 #25 v Col-0	-5.13139	2.87605e-07	IHW	1.97052e-06	ashr	-0.824442	0.177868
DAS44	AT2G38040	12796	~genotype	Wald	35S::SLIM1 #25 v Col-0	-2.92635	0.00342969	IHW	0.00858701	ashr	-0.268506	0.0961676
DAS44	AT2G40100	2459.03	~genotype	Wald	35S::SLIM1 #25 v Col-0	-9.50806	1.94244e-21	IHW	9.98482e-20	ashr	-1.15597	0.124148
DAS44	AT2G47450	11188.7	~genotype	Wald	35S::SLIM1 #25 v Col-0	-7.09954	1.2517e-12	IHW	2.07146e-11	ashr	-0.911306	0.134988
DAS44	AT3G08940	72992.9	~genotype	Wald	35S::SLIM1 #25 v Col-0	-10.8975	1.18433e-27	IHW	9.70651e-26	ashr	-2.09353	0.19658
DAS44	AT3G27690	23803.2	~genotype	Wald	35S::SLIM1 #25 v Col-0	-17.8633	2.27872e-71	IHW	5.19296e-68	ashr	-3.8417	0.219619
DAS44	AT3G47470	231739	~genotype	Wald	35S::SLIM1 #25 v Col-0	-11.5957	4.33349e-31	IHW	4.88837e-29	ashr	-1.94766	0.171008
DAS44	AT3G54890	157004	~genotype	Wald	35S::SLIM1 #25 v Col-0	-11.5652	6.18175e-31	IHW	6.87209e-29	ashr	-2.13611	0.188626
DAS44	AT3G61470	125563	~genotype	Wald	35S::SLIM1 #25 v Col-0	-8.8336	1.01359e-18	IHW	3.54049e-17	ashr	-1.52927	0.17711
DAS44	AT3G62910	1123.85	~genotype	Wald	35S::SLIM1 #25 v Col-0	-4.41017	1.03288e-05	IHW	5.602e-05	ashr	-0.773357	0.200732
DAS44	AT3G63410	8229.91	~genotype	Wald	35S::SLIM1 #25 v Col-0	-6.59733	4.18631e-11	IHW	5.56196e-10	ashr	-0.934377	0.150114
DAS44	AT4G10340	169666	~genotype	Wald	35S::SLIM1 #25 v Col-0	-11.7369	8.2479e-32	IHW	9.96858e-30	ashr	-1.89894	0.164534
DAS44	AT4G20130	1109.86	~genotype	Wald	35S::SLIM1 #25 v Col-0	-4.77187	1.82522e-06	IHW	1.18381e-05	ashr	-0.955984	0.225524
DAS44	AT5G13630	48138.6	~genotype	Wald	35S::SLIM1 #25 v Col-0	-18.0175	1.42049e-72	IHW	4.8557e-69	ashr	-2.17554	0.121811
DAS44	AT5G13730	555.984	~genotype	Wald	35S::SLIM1 #25 v Col-0	-5.94791	2.71594e-09	IHW	3.81011e-08	ashr	-0.787558	0.142653
DAS44	AT5G16390	2124.2	~genotype	Wald	35S::SLIM1 #25 v Col-0	-5.58019	2.4026e-08	IHW	2.09961e-07	ashr	-0.793893	0.154893
DAS44	AT5G24120	1256.15	~genotype	Wald	35S::SLIM1 #25 v Col-0	-5.68021	1.34533e-08	IHW	1.24001e-07	ashr	-1.05979	0.201208
DAS44	AT5G35360	5121.53	~genotype	Wald	35S::SLIM1 #25 v Col-0	-3.98226	6.82634e-05	IHW	0.000312869	ashr	-0.592545	0.169046
DAS44	AT5G38420	31186.1	~genotype	Wald	35S::SLIM1 #25 v Col-0	-13.3682	9.27673e-41	IHW	2.73369e-38	ashr	-3.19333	0.245924
DAS44	AT5G38430	11979.6	~genotype	Wald	35S::SLIM1 #25 v Col-0	-4.09138	4.28817e-05	IHW	0.000166976	ashr	-0.958388	0.276867
DAS44	AT5G54270	127102	~genotype	Wald	35S::SLIM1 #25 v Col-0	-15.3196	5.65351e-53	IHW	4.38448e-50	ashr	-3.11098	0.207407
DAS44	AT5G64140	1527.43	~genotype	Wald	35S::SLIM1 #25 v Col-0	-0.997003	0.318763	IHW	0.387918	ashr	-0.157549	0.184429

## Sheet: Figure 3d
Col-0 vs EV	Mean Col-0	Mean of EV	Difference	SE of difference	test	t ratio	df	P value	Adjusted P Value	p-value adjustment method
30DAS	1.076	1.004	0.07247	0.0712	t-test	1.018	4	0.366312	>0.999999	Benjamini-Yekutieli
37DAS	1.139	0.9162	0.2232	0.1293	t-test	1.726	4	0.159372	0.664051	Benjamini-Yekutieli
44DAS	1.032	0.885	0.1468	0.06757	t-test	2.173	4	0.095542	0.664051	Benjamini-Yekutieli
51DAS	1.091	1.052	0.03945	0.06783	t-test	0.5815	4	0.592072	>0.999999	Benjamini-Yekutieli
Col-0 vs slim1-cr	Mean Col-0	Mean of slim1-cr
30DAS	1.076	1.005	0.07132	0.06333	t-test	1.126	4	0.323072	>0.999999	Benjamini-Yekutieli
37DAS	1.139	1.06	0.07928	0.1241	t-test	0.6389	4	0.557642	>0.999999	Benjamini-Yekutieli
44DAS	1.032	0.9459	0.08589	0.07572	t-test	1.134	4	0.320032	>0.999999	Benjamini-Yekutieli
51DAS	1.091	1.127	-0.03609	0.09211	t-test	0.3919	4	0.715146	>0.999999	Benjamini-Yekutieli
Col-0 vs 35S::SLIM1 #17	Mean Col-0	Mean of 35S::SLIM1 #17
30DAS	1.076	1.1	-0.02313	0.05797	t-test	0.399	4	0.710256	0.994358	Benjamini-Yekutieli
37DAS	1.139	1.14	-0.0003509	0.2099	t-test	0.001672	4	0.998746	>0.999999	Benjamini-Yekutieli
44DAS	1.032	0.9021	0.1297	0.1252	t-test	1.036	4	0.358842	0.753568	Benjamini-Yekutieli
51DAS	1.091	0.76	0.331	0.0925	t-test	3.578	4	0.023204	0.487456	Benjamini-Yekutieli
Col-0 vs 35S::SLIM1 #25	Mean Col-0	Mean of 35S::SLIM1 #25
30DAS	1.076	1.077	-0.0007514	0.04791	t-test	0.01568	4	0.988237	>0.999999	Benjamini-Yekutieli
37DAS	1.139	1.071	0.06806	0.1213	t-test	0.5612	4	0.604637	>0.999999	Benjamini-Yekutieli
44DAS	1.032	0.8201	0.2117	0.06947	t-test	3.047	4	0.03814	0.158915	Benjamini-Yekutieli
51DAS	1.091	0.7282	0.3628	0.06795	t-test	5.339	4	0.005928	0.049401	Benjamini-Yekutieli
Col-0 vs 35S::SLIM1 #39	Mean Col-0	Mean of 35S::SLIM1 #39
30DAS	1.076	1.116	-0.03969	0.05262	t-test	0.7543	4	0.492628	>0.999999	Benjamini-Yekutieli
37DAS	1.139	1.113	0.02659	0.1301	t-test	0.2043	4	0.848076	>0.999999	Benjamini-Yekutieli
44DAS	1.032	1.002	0.02967	0.07667	t-test	0.387	4	0.718445	>0.999999	Benjamini-Yekutieli
51DAS	1.091	0.8822	0.2088	0.07426	t-test	2.811	4	0.018269	0.042238	Benjamini-Yekutieli

## Sheet: Figure 4b
timepoint	geneID	baseMean	model	test	contrast	stat	pvalue	padjMethod	padj	lfcModeration	log2FoldChange	lfcSE
DAS30	AT1G12110	4840.44	~genotype	Wald	EV v Col-0	-2.25451	0.0241643	IHW	0.376757	ashr	-0.0708544	0.0796378
DAS30	AT1G12940	52.8004	~genotype	Wald	EV v Col-0	-0.657231	0.511033	IHW	1	ashr	-0.00681299	0.0765221
DAS30	AT1G20640	1342.2	~genotype	Wald	EV v Col-0	1.47845	0.139286	IHW	0.642297	ashr	0.0497731	0.0581135
DAS30	AT1G22550	228.197	~genotype	Wald	EV v Col-0	-0.965856	0.334116	IHW	1	ashr	-0.0249538	0.0675471
DAS30	AT1G32450	585.162	~genotype	Wald	EV v Col-0	-1.39605	0.162699	IHW	0.739189	ashr	-0.0293957	0.0754269
DAS30	AT1G52190	3933.72	~genotype	Wald	EV v Col-0	-1.0981	0.272163	IHW	0.928868	ashr	-0.0268366	0.0697131
DAS30	AT1G64530	800.956	~genotype	Wald	EV v Col-0	0.768385	0.442259	IHW	0.873807	ashr	0.0256059	0.0560151
DAS30	AT1G69870	3036.95	~genotype	Wald	EV v Col-0	-0.259087	0.795568	IHW	1	ashr	-0.00736783	0.0629848
DAS30	AT1G72130	1067.76	~genotype	Wald	EV v Col-0	-1.09773	0.272324	IHW	0.777025	ashr	-0.0267321	0.0697931
DAS30	AT1G72140	16.949	~genotype	Wald	EV v Col-0	1.54208	0.123054	IHW	1	ashr	0.0159217	0.0799768
DAS30	AT1G76350	746.479	~genotype	Wald	EV v Col-0	1.58856	0.11216	IHW	0.695388	ashr	0.0540897	0.0575786
DAS30	AT2G17150	528.94	~genotype	Wald	EV v Col-0	1.19659	0.231467	IHW	0.836831	ashr	0.040762	0.0549178
DAS30	AT2G43500	607.975	~genotype	Wald	EV v Col-0	2.01006	0.0444248	IHW	0.514033	ashr	0.0708118	0.0540251
DAS30	AT3G16180	905.191	~genotype	Wald	EV v Col-0	0.234104	0.814904	IHW	1	ashr	0.00706372	0.0609249
DAS30	AT3G21670	2555.81	~genotype	Wald	EV v Col-0	-0.89322	0.37174	IHW	0.853929	ashr	-0.0263203	0.0631718
DAS30	AT3G45650	250.106	~genotype	Wald	EV v Col-0	0.585493	0.558216	IHW	1	ashr	0.0139209	0.0678844
DAS30	AT3G59580	119.526	~genotype	Wald	EV v Col-0	0.260794	0.794251	IHW	1	ashr	0.0060602	0.0676696
DAS30	AT3G60320	5569.04	~genotype	Wald	EV v Col-0	-0.865599	0.38671	IHW	0.843371	ashr	-0.027988	0.0585968
DAS30	AT4G21680	59.6894	~genotype	Wald	EV v Col-0	1.08575	0.277591	IHW	1	ashr	0.0121278	0.0775956
DAS30	AT4G24020	2774.11	~genotype	Wald	EV v Col-0	1.53018	0.125973	IHW	0.621023	ashr	0.0484009	0.0636205
DAS30	AT4G35270	962.142	~genotype	Wald	EV v Col-0	1.50902	0.131293	IHW	0.628409	ashr	0.0505394	0.058902
DAS30	AT4G38340	35.425	~genotype	Wald	EV v Col-0	-1.07011	0.284571	IHW	0.956791	ashr	-0.0125314	0.0773812
DAS30	AT5G14570	1290.64	~genotype	Wald	EV v Col-0	-0.66973	0.50303	IHW	0.902031	ashr	-0.0185598	0.0644777
DAS30	AT5G40890	4976.6	~genotype	Wald	EV v Col-0	-0.49582	0.620021	IHW	0.791461	ashr	-0.0139853	0.0635546
DAS30	AT5G62720	3700.44	~genotype	Wald	EV v Col-0	-1.52521	0.127207	IHW	0.623204	ashr	-0.0426262	0.0696954
DAS30	AT1G12110	4840.44	~genotype	Wald	slim1-cr v Col-0	-0.865638	0.386689	IHW	0.556954	ashr	-0.0740243	0.111691
DAS30	AT1G12940	52.8004	~genotype	Wald	slim1-cr v Col-0	1.01689	0.309205	IHW	1	ashr	0.0549126	0.175658
DAS30	AT1G20640	1342.2	~genotype	Wald	slim1-cr v Col-0	-0.208285	0.835007	IHW	0.977199	ashr	-0.0152714	0.0838835
DAS30	AT1G22550	228.197	~genotype	Wald	slim1-cr v Col-0	-3.47756	0.000506003	IHW	0.0127837	ashr	-0.327525	0.146545
DAS30	AT1G32450	585.162	~genotype	Wald	slim1-cr v Col-0	0.251441	0.801473	IHW	0.941683	ashr	0.0209044	0.142036
DAS30	AT1G52190	3933.72	~genotype	Wald	slim1-cr v Col-0	-1.31731	0.187733	IHW	0.357154	ashr	-0.115107	0.129278
DAS30	AT1G64530	800.956	~genotype	Wald	slim1-cr v Col-0	-4.25589	2.08219e-05	IHW	0.000964254	ashr	-0.315838	0.0862933
DAS30	AT1G69870	3036.95	~genotype	Wald	slim1-cr v Col-0	0.269361	0.787652	IHW	0.818485	ashr	0.022798	0.108574
DAS30	AT1G72130	1067.76	~genotype	Wald	slim1-cr v Col-0	-1.68468	0.0920494	IHW	0.242474	ashr	-0.147909	0.130878
DAS30	AT1G72140	16.949	~genotype	Wald	slim1-cr v Col-0	1.4171	0.156453	IHW	1	ashr	0.0751654	0.183139
DAS30	AT1G76350	746.479	~genotype	Wald	slim1-cr v Col-0	0.705983	0.480199	IHW	0.718514	ashr	0.0507934	0.0816651
DAS30	AT2G17150	528.94	~genotype	Wald	slim1-cr v Col-0	-0.534866	0.592742	IHW	0.882165	ashr	-0.0372441	0.0780867
DAS30	AT2G43500	607.975	~genotype	Wald	slim1-cr v Col-0	0.553311	0.58005	IHW	0.79208	ashr	0.0358115	0.0710304
DAS30	AT3G16180	905.191	~genotype	Wald	slim1-cr v Col-0	-3.162	0.00156691	IHW	0.0205805	ashr	-0.264138	0.104617
DAS30	AT3G21670	2555.81	~genotype	Wald	slim1-cr v Col-0	0.114934	0.908497	IHW	0.848279	ashr	0.00960255	0.105116
DAS30	AT3G45650	250.106	~genotype	Wald	slim1-cr v Col-0	-0.685047	0.493314	IHW	0.899885	ashr	-0.0594789	0.129588
DAS30	AT3G59580	119.526	~genotype	Wald	slim1-cr v Col-0	1.59802	0.110038	IHW	0.402822	ashr	0.139911	0.132249
DAS30	AT3G60320	5569.04	~genotype	Wald	slim1-cr v Col-0	-4.10583	4.02866e-05	IHW	0.00131812	ashr	-0.32192	0.0940482
DAS30	AT4G21680	59.6894	~genotype	Wald	slim1-cr v Col-0	-0.452279	0.651068	IHW	1	ashr	-0.0249723	0.1708
DAS30	AT4G24020	2774.11	~genotype	Wald	slim1-cr v Col-0	-2.02974	0.0423825	IHW	0.148513	ashr	-0.164793	0.0988575
DAS30	AT4G35270	962.142	~genotype	Wald	slim1-cr v Col-0	-2.27768	0.0227457	IHW	0.113122	ashr	-0.170686	0.0866687
DAS30	AT4G38340	35.425	~genotype	Wald	slim1-cr v Col-0	-0.60251	0.546835	IHW	1	ashr	-0.034997	0.169541
DAS30	AT5G14570	1290.64	~genotype	Wald	slim1-cr v Col-0	-0.980018	0.327077	IHW	0.581244	ashr	-0.0841175	0.112975
DAS30	AT5G40890	4976.6	~genotype	Wald	slim1-cr v Col-0	-2.84956	0.00437802	IHW	0.035222	ashr	-0.247699	0.114745
DAS30	AT5G62720	3700.44	~genotype	Wald	slim1-cr v Col-0	-4.26006	2.04376e-05	IHW	0.000802647	ashr	-0.418486	0.155223
DAS30	AT1G12110	4840.44	~genotype	Wald	35S::SLIM1 #17 v Col-0	-0.414616	0.678423	IHW	0.897687	ashr	-0.0244556	0.0939651
DAS30	AT1G12940	52.8004	~genotype	Wald	35S::SLIM1 #17 v Col-0	-0.69682	0.485915	IHW	0.847295	ashr	-0.0409276	0.189951
DAS30	AT1G20640	1342.2	~genotype	Wald	35S::SLIM1 #17 v Col-0	0.599096	0.549109	IHW	0.769437	ashr	0.0295431	0.0712181
DAS30	AT1G22550	228.197	~genotype	Wald	35S::SLIM1 #17 v Col-0	-2.72151	0.00649841	IHW	0.0535002	ashr	-0.266993	0.173336
DAS30	AT1G32450	585.162	~genotype	Wald	35S::SLIM1 #17 v Col-0	0.373583	0.708715	IHW	0.776804	ashr	0.0236091	0.125166
DAS30	AT1G52190	3933.72	~genotype	Wald	35S::SLIM1 #17 v Col-0	-0.815758	0.414638	IHW	0.631469	ashr	-0.052947	0.116167
DAS30	AT1G64530	800.956	~genotype	Wald	35S::SLIM1 #17 v Col-0	-3.32941	0.000870293	IHW	0.0122004	ashr	-0.245492	0.0935085
DAS30	AT1G69870	3036.95	~genotype	Wald	35S::SLIM1 #17 v Col-0	2.29026	0.0220063	IHW	0.117335	ashr	0.183122	0.127715
DAS30	AT1G72130	1067.76	~genotype	Wald	35S::SLIM1 #17 v Col-0	-0.485986	0.626977	IHW	0.835574	ashr	-0.0305238	0.111125
DAS30	AT1G72140	16.949	~genotype	Wald	35S::SLIM1 #17 v Col-0	1.54139	0.123222	IHW	0.612629	ashr	0.110271	0.254201
DAS30	AT1G76350	746.479	~genotype	Wald	35S::SLIM1 #17 v Col-0	0.502611	0.615238	IHW	0.728995	ashr	0.0240197	0.0683607
DAS30	AT2G17150	528.94	~genotype	Wald	35S::SLIM1 #17 v Col-0	-1.34235	0.179481	IHW	0.407399	ashr	-0.0713815	0.0772839
DAS30	AT2G43500	607.975	~genotype	Wald	35S::SLIM1 #17 v Col-0	4.53951	5.63858e-06	IHW	0.000263625	ashr	0.300405	0.0770007
DAS30	AT3G16180	905.191	~genotype	Wald	35S::SLIM1 #17 v Col-0	-1.75546	0.0791815	IHW	0.273002	ashr	-0.120375	0.106828
DAS30	AT3G21670	2555.81	~genotype	Wald	35S::SLIM1 #17 v Col-0	0.847086	0.396947	IHW	0.636031	ashr	0.0506244	0.0939825
DAS30	AT3G45650	250.106	~genotype	Wald	35S::SLIM1 #17 v Col-0	-1.92575	0.0541353	IHW	0.21617	ashr	-0.15711	0.155509
DAS30	AT3G59580	119.526	~genotype	Wald	35S::SLIM1 #17 v Col-0	1.20112	0.229706	IHW	0.450572	ashr	0.0831146	0.128515
DAS30	AT3G60320	5569.04	~genotype	Wald	35S::SLIM1 #17 v Col-0	-1.37868	0.167995	IHW	0.447477	ashr	-0.0814018	0.0885407
DAS30	AT4G21680	59.6894	~genotype	Wald	35S::SLIM1 #17 v Col-0	-1.83218	0.0669246	IHW	0.297936	ashr	-0.150666	0.284452
DAS30	AT4G24020	2774.11	~genotype	Wald	35S::SLIM1 #17 v Col-0	-1.10338	0.26986	IHW	0.535893	ashr	-0.0657578	0.0918294
DAS30	AT4G35270	962.142	~genotype	Wald	35S::SLIM1 #17 v Col-0	2.78424	0.00536525	IHW	0.0452558	ashr	0.200044	0.0957822
DAS30	AT4G38340	35.425	~genotype	Wald	35S::SLIM1 #17 v Col-0	0.290571	0.771379	IHW	1	ashr	0.016899	0.16932
DAS30	AT5G14570	1290.64	~genotype	Wald	35S::SLIM1 #17 v Col-0	1.57555	0.11513	IHW	0.335528	ashr	0.110798	0.117047
DAS30	AT5G40890	4976.6	~genotype	Wald	35S::SLIM1 #17 v Col-0	-2.10512	0.0352813	IHW	0.190218	ashr	-0.163444	0.126281
DAS30	AT5G62720	3700.44	~genotype	Wald	35S::SLIM1 #17 v Col-0	-3.38166	0.000720481	IHW	0.00948224	ashr	-0.366648	0.173028
DAS30	AT1G12110	4840.44	~genotype	Wald	35S::SLIM1 #25 v Col-0	-1.68502	0.0919838	IHW	0.287704	ashr	-0.127277	0.113466
DAS30	AT1G12940	52.8004	~genotype	Wald	35S::SLIM1 #25 v Col-0	-0.321335	0.747957	IHW	1	ashr	-0.018095	0.17828
DAS30	AT1G20640	1342.2	~genotype	Wald	35S::SLIM1 #25 v Col-0	0.941779	0.346306	IHW	0.56715	ashr	0.0597798	0.0789771
DAS30	AT1G22550	228.197	~genotype	Wald	35S::SLIM1 #25 v Col-0	0.917707	0.358772	IHW	0.519318	ashr	0.0665479	0.113747
DAS30	AT1G32450	585.162	~genotype	Wald	35S::SLIM1 #25 v Col-0	-1.0695	0.284845	IHW	0.663081	ashr	-0.078772	0.14236
DAS30	AT1G52190	3933.72	~genotype	Wald	35S::SLIM1 #25 v Col-0	0.983904	0.325163	IHW	0.54456	ashr	0.0720946	0.122103
DAS30	AT1G64530	800.956	~genotype	Wald	35S::SLIM1 #25 v Col-0	-2.12747	0.0333811	IHW	0.161741	ashr	-0.140344	0.082645
DAS30	AT1G69870	3036.95	~genotype	Wald	35S::SLIM1 #25 v Col-0	5.50469	3.6982e-08	IHW	4.58597e-06	ashr	0.674758	0.140211
DAS30	AT1G72130	1067.76	~genotype	Wald	35S::SLIM1 #25 v Col-0	-2.01392	0.0440183	IHW	0.182778	ashr	-0.170984	0.151585
DAS30	AT1G72140	16.949	~genotype	Wald	35S::SLIM1 #25 v Col-0	0.433981	0.664302	IHW	1	ashr	0.0239389	0.183305
DAS30	AT1G76350	746.479	~genotype	Wald	35S::SLIM1 #25 v Col-0	0.892451	0.372151	IHW	0.719374	ashr	0.0557267	0.0768734
DAS30	AT2G17150	528.94	~genotype	Wald	35S::SLIM1 #25 v Col-0	-0.746753	0.455213	IHW	0.741677	ashr	-0.0452648	0.0733968
DAS30	AT2G43500	607.975	~genotype	Wald	35S::SLIM1 #25 v Col-0	2.97062	0.002972	IHW	0.0409031	ashr	0.179724	0.0715138
DAS30	AT3G16180	905.191	~genotype	Wald	35S::SLIM1 #25 v Col-0	1.66136	0.0966414	IHW	0.238089	ashr	0.119158	0.0990178
DAS30	AT3G21670	2555.81	~genotype	Wald	35S::SLIM1 #25 v Col-0	-1.55562	0.119799	IHW	0.313979	ashr	-0.113307	0.103808
DAS30	AT3G45650	250.106	~genotype	Wald	35S::SLIM1 #25 v Col-0	-0.47895	0.631974	IHW	0.698031	ashr	-0.0340608	0.117984
DAS30	AT3G59580	119.526	~genotype	Wald	35S::SLIM1 #25 v Col-0	0.0805747	0.93578	IHW	0.896666	ashr	0.00567467	0.117848
DAS30	AT3G60320	5569.04	~genotype	Wald	35S::SLIM1 #25 v Col-0	-0.0332113	0.973506	IHW	1	ashr	-0.00214888	0.0822326
DAS30	AT4G21680	59.6894	~genotype	Wald	35S::SLIM1 #25 v Col-0	-0.36704	0.713589	IHW	1	ashr	-0.0211976	0.175636
DAS30	AT4G24020	2774.11	~genotype	Wald	35S::SLIM1 #25 v Col-0	0.920388	0.35737	IHW	0.614171	ashr	0.0629132	0.0915091
DAS30	AT4G35270	962.142	~genotype	Wald	35S::SLIM1 #25 v Col-0	0.165786	0.868325	IHW	0.755901	ashr	0.0104983	0.0790101
DAS30	AT4G38340	35.425	~genotype	Wald	35S::SLIM1 #25 v Col-0	-1.54934	0.1213	IHW	0.451432	ashr	-0.108546	0.221525
DAS30	AT5G14570	1290.64	~genotype	Wald	35S::SLIM1 #25 v Col-0	1.72375	0.0847528	IHW	0.256429	ashr	0.131207	0.11542
DAS30	AT5G40890	4976.6	~genotype	Wald	35S::SLIM1 #25 v Col-0	0.191786	0.84791	IHW	0.947979	ashr	0.0133576	0.0995949
DAS30	AT5G62720	3700.44	~genotype	Wald	35S::SLIM1 #25 v Col-0	-0.047516	0.962102	IHW	0.850745	ashr	-0.00333772	0.104719
DAS37	AT1G12110	9506.21	~genotype	Wald	slim1-cr v Col-0	-0.806317	0.42006	IHW	0.55346	ashr	-0.0772108	0.161484
DAS37	AT1G12940	120.379	~genotype	Wald	slim1-cr v Col-0	-1.66544	0.0958252	IHW	0.366314	ashr	-0.170926	0.239725
DAS37	AT1G20640	1332.46	~genotype	Wald	slim1-cr v Col-0	-1.17836	0.238651	IHW	0.408266	ashr	-0.0934934	0.0959761
DAS37	AT1G22550	204.18	~genotype	Wald	slim1-cr v Col-0	0.967969	0.33306	IHW	0.696563	ashr	0.0933269	0.147273
DAS37	AT1G32450	751.165	~genotype	Wald	slim1-cr v Col-0	3.10535	0.00190055	IHW	0.0186712	ashr	0.39476	0.212273
DAS37	AT1G52190	4287.85	~genotype	Wald	slim1-cr v Col-0	1.46469	0.143007	IHW	0.298928	ashr	0.146103	0.208263
DAS37	AT1G64530	868.439	~genotype	Wald	slim1-cr v Col-0	-0.601572	0.547459	IHW	0.498443	ashr	-0.0495057	0.101906
DAS37	AT1G69870	7705.43	~genotype	Wald	slim1-cr v Col-0	-2.28859	0.0221031	IHW	0.0934961	ashr	-0.279716	0.269151
DAS37	AT1G72130	928.047	~genotype	Wald	slim1-cr v Col-0	-0.130634	0.896065	IHW	0.963367	ashr	-0.0121406	0.134282
DAS37	AT1G72140	32.3168	~genotype	Wald	slim1-cr v Col-0	1.97297	0.0484984	IHW	0.224847	ashr	0.215713	0.347393
DAS37	AT1G76350	933.227	~genotype	Wald	slim1-cr v Col-0	-0.641305	0.521324	IHW	0.690359	ashr	-0.0599467	0.170918
DAS37	AT2G17150	580.532	~genotype	Wald	slim1-cr v Col-0	0.758994	0.447856	IHW	0.735987	ashr	0.0516621	0.0777857
DAS37	AT2G43500	681.525	~genotype	Wald	slim1-cr v Col-0	-0.325021	0.745165	IHW	0.960185	ashr	-0.0301086	0.131777
DAS37	AT3G16180	1511.69	~genotype	Wald	slim1-cr v Col-0	-1.41981	0.155664	IHW	0.267976	ashr	-0.142608	0.186423
DAS37	AT3G21670	1998.23	~genotype	Wald	slim1-cr v Col-0	0.588733	0.55604	IHW	0.658567	ashr	0.0543108	0.17516
DAS37	AT3G45650	374.427	~genotype	Wald	slim1-cr v Col-0	0.195355	0.845115	IHW	1	ashr	0.0183678	0.144517
DAS37	AT3G59580	103.013	~genotype	Wald	slim1-cr v Col-0	0.541234	0.588346	IHW	1	ashr	0.0507669	0.16509
DAS37	AT3G60320	5672.65	~genotype	Wald	slim1-cr v Col-0	0.743863	0.45696	IHW	0.558314	ashr	0.0664208	0.118095
DAS37	AT4G21680	757.746	~genotype	Wald	slim1-cr v Col-0	-1.92711	0.0539661	IHW	0.177909	ashr	-0.205005	0.345789
DAS37	AT4G24020	3250.7	~genotype	Wald	slim1-cr v Col-0	-4.97679	6.46477e-07	IHW	3.31171e-05	ashr	-0.378422	0.0855956
DAS37	AT4G35270	801.839	~genotype	Wald	slim1-cr v Col-0	0.624236	0.532473	IHW	0.698412	ashr	0.0587972	0.138121
DAS37	AT4G38340	49.6788	~genotype	Wald	slim1-cr v Col-0	0.0127661	0.989814	IHW	1	ashr	0.000953495	0.219561
DAS37	AT5G14570	2079.77	~genotype	Wald	slim1-cr v Col-0	-0.42747	0.669037	IHW	0.740563	ashr	-0.0392544	0.127624
DAS37	AT5G40890	3843.72	~genotype	Wald	slim1-cr v Col-0	-1.01693	0.309188	IHW	0.457282	ashr	-0.098078	0.145583
DAS37	AT5G62720	2903.08	~genotype	Wald	slim1-cr v Col-0	0.298709	0.765162	IHW	0.79723	ashr	0.0265286	0.181304
DAS37	AT1G12110	9506.21	~genotype	Wald	35S::SLIM1 #17 v Col-0	2.10981	0.034875	IHW	0.0752909	ashr	0.389139	0.238246
DAS37	AT1G12940	120.379	~genotype	Wald	35S::SLIM1 #17 v Col-0	5.09405	3.50498e-07	IHW	3.67643e-06	ashr	1.68359	0.399618
DAS37	AT1G20640	1332.46	~genotype	Wald	35S::SLIM1 #17 v Col-0	3.64072	0.000271875	IHW	0.00131493	ashr	0.371285	0.109349
DAS37	AT1G22550	204.18	~genotype	Wald	35S::SLIM1 #17 v Col-0	3.45468	0.000550937	IHW	0.00238235	ashr	0.601862	0.205949
DAS37	AT1G32450	751.165	~genotype	Wald	35S::SLIM1 #17 v Col-0	0.183059	0.854751	IHW	0.900186	ashr	0.0265936	0.175443
DAS37	AT1G52190	4287.85	~genotype	Wald	35S::SLIM1 #17 v Col-0	3.31597	0.000913269	IHW	0.00443484	ashr	0.838907	0.358726
DAS37	AT1G64530	868.439	~genotype	Wald	35S::SLIM1 #17 v Col-0	-1.96401	0.0495287	IHW	0.100251	ashr	-0.211857	0.121023
DAS37	AT1G69870	7705.43	~genotype	Wald	35S::SLIM1 #17 v Col-0	0.546745	0.584554	IHW	0.689939	ashr	0.0995694	0.249636
DAS37	AT1G72130	928.047	~genotype	Wald	35S::SLIM1 #17 v Col-0	-2.71843	0.00655917	IHW	0.0207868	ashr	-0.431284	0.18745
DAS37	AT1G72140	32.3168	~genotype	Wald	35S::SLIM1 #17 v Col-0	0.174802	0.861235	IHW	0.905092	ashr	0.0346121	0.345896
DAS37	AT1G76350	933.227	~genotype	Wald	35S::SLIM1 #17 v Col-0	2.50805	0.0121398	IHW	0.0319247	ashr	0.523018	0.282164
DAS37	AT2G17150	580.532	~genotype	Wald	35S::SLIM1 #17 v Col-0	-4.41878	9.9258e-06	IHW	7.35587e-05	ashr	-0.37681	0.0893059
DAS37	AT2G43500	681.525	~genotype	Wald	35S::SLIM1 #17 v Col-0	1.62738	0.103657	IHW	0.196579	ashr	0.233808	0.171953
DAS37	AT3G16180	1511.69	~genotype	Wald	35S::SLIM1 #17 v Col-0	1.32417	0.185446	IHW	0.289402	ashr	0.241552	0.24381
DAS37	AT3G21670	1998.23	~genotype	Wald	35S::SLIM1 #17 v Col-0	-5.71041	1.12706e-08	IHW	2.01632e-07	ashr	-1.66491	0.334446
DAS37	AT3G45650	374.427	~genotype	Wald	35S::SLIM1 #17 v Col-0	1.32769	0.184282	IHW	0.248386	ashr	0.208999	0.195191
DAS37	AT3G59580	103.013	~genotype	Wald	35S::SLIM1 #17 v Col-0	4.20972	2.55684e-05	IHW	0.000168642	ashr	0.963674	0.290114
DAS37	AT3G60320	5672.65	~genotype	Wald	35S::SLIM1 #17 v Col-0	7.10585	1.19585e-12	IHW	3.26127e-11	ashr	1.0194	0.155923
DAS37	AT4G21680	757.746	~genotype	Wald	35S::SLIM1 #17 v Col-0	-0.0513488	0.959048	IHW	0.974809	ashr	-0.0101501	0.348718
DAS37	AT4G24020	3250.7	~genotype	Wald	35S::SLIM1 #17 v Col-0	2.8923	0.00382428	IHW	0.0122638	ashr	0.232198	0.0857545
DAS37	AT4G35270	801.839	~genotype	Wald	35S::SLIM1 #17 v Col-0	-2.15675	0.0310252	IHW	0.074064	ashr	-0.336589	0.188088
DAS37	AT4G38340	49.6788	~genotype	Wald	35S::SLIM1 #17 v Col-0	3.91225	9.14385e-05	IHW	0.000511915	ashr	1.68621	0.681937
DAS37	AT5G14570	2079.77	~genotype	Wald	35S::SLIM1 #17 v Col-0	1.88972	0.0587959	IHW	0.115045	ashr	0.265135	0.165807
DAS37	AT5G40890	3843.72	~genotype	Wald	35S::SLIM1 #17 v Col-0	1.42861	0.153117	IHW	0.249284	ashr	0.217631	0.186346
DAS37	AT5G62720	2903.08	~genotype	Wald	35S::SLIM1 #17 v Col-0	-3.54121	0.000398292	IHW	0.00181943	ashr	-0.963744	0.389576
DAS37	AT1G12110	9506.21	~genotype	Wald	35S::SLIM1 #25 v Col-0	-1.33385	0.182251	IHW	0.47547	ashr	-0.158852	0.201308
DAS37	AT1G12940	120.379	~genotype	Wald	35S::SLIM1 #25 v Col-0	1.17022	0.241911	IHW	0.459123	ashr	0.153416	0.255849
DAS37	AT1G20640	1332.46	~genotype	Wald	35S::SLIM1 #25 v Col-0	3.74894	0.000177584	IHW	0.00126108	ashr	0.362927	0.114525
DAS37	AT1G22550	204.18	~genotype	Wald	35S::SLIM1 #25 v Col-0	3.83978	0.000123147	IHW	0.000901492	ashr	0.67235	0.223168
DAS37	AT1G32450	751.165	~genotype	Wald	35S::SLIM1 #25 v Col-0	-0.877876	0.380011	IHW	0.589865	ashr	-0.087925	0.154591
DAS37	AT1G52190	4287.85	~genotype	Wald	35S::SLIM1 #25 v Col-0	4.09081	4.29874e-05	IHW	0.000367009	ashr	1.16889	0.393542
DAS37	AT1G64530	868.439	~genotype	Wald	35S::SLIM1 #25 v Col-0	-2.11107	0.0347663	IHW	0.087504	ashr	-0.191333	0.12185
DAS37	AT1G69870	7705.43	~genotype	Wald	35S::SLIM1 #25 v Col-0	-2.03502	0.0418492	IHW	0.156325	ashr	-0.329615	0.301995
DAS37	AT1G72130	928.047	~genotype	Wald	35S::SLIM1 #25 v Col-0	-3.38316	0.000716578	IHW	0.00349179	ashr	-0.527886	0.2084
DAS37	AT1G72140	32.3168	~genotype	Wald	35S::SLIM1 #25 v Col-0	-0.685886	0.492785	IHW	0.691614	ashr	-0.0874661	0.293969
DAS37	AT1G76350	933.227	~genotype	Wald	35S::SLIM1 #25 v Col-0	0.882025	0.377763	IHW	0.587902	ashr	0.10125	0.199817
DAS37	AT2G17150	580.532	~genotype	Wald	35S::SLIM1 #25 v Col-0	-4.24524	2.18355e-05	IHW	0.000159463	ashr	-0.347503	0.0923639
DAS37	AT2G43500	681.525	~genotype	Wald	35S::SLIM1 #25 v Col-0	1.98085	0.0476084	IHW	0.134301	ashr	0.229843	0.175676
DAS37	AT3G16180	1511.69	~genotype	Wald	35S::SLIM1 #25 v Col-0	0.816953	0.413955	IHW	0.617093	ashr	0.0917865	0.192558
DAS37	AT3G21670	1998.23	~genotype	Wald	35S::SLIM1 #25 v Col-0	-4.48618	7.25101e-06	IHW	7.55526e-05	ashr	-1.24599	0.357767
DAS37	AT3G45650	374.427	~genotype	Wald	35S::SLIM1 #25 v Col-0	4.37382	1.22089e-05	IHW	0.000117428	ashr	0.82889	0.230366
DAS37	AT3G59580	103.013	~genotype	Wald	35S::SLIM1 #25 v Col-0	3.58028	0.000343229	IHW	0.0024264	ashr	0.772747	0.303603
DAS37	AT3G60320	5672.65	~genotype	Wald	35S::SLIM1 #25 v Col-0	2.37743	0.0174337	IHW	0.0681308	ashr	0.259948	0.153041
DAS37	AT4G21680	757.746	~genotype	Wald	35S::SLIM1 #25 v Col-0	-2.85749	0.00427006	IHW	0.0154967	ashr	-0.887103	0.69863
DAS37	AT4G24020	3250.7	~genotype	Wald	35S::SLIM1 #25 v Col-0	2.48312	0.0130238	IHW	0.0507032	ashr	0.175953	0.086316
DAS37	AT4G35270	801.839	~genotype	Wald	35S::SLIM1 #25 v Col-0	-3.10911	0.00187649	IHW	0.00756982	ashr	-0.475765	0.213243
DAS37	AT4G38340	49.6788	~genotype	Wald	35S::SLIM1 #25 v Col-0	1.21534	0.224237	IHW	0.524764	ashr	0.174816	0.351917
DAS37	AT5G14570	2079.77	~genotype	Wald	35S::SLIM1 #25 v Col-0	1.18577	0.235714	IHW	0.521886	ashr	0.113916	0.141893
DAS37	AT5G40890	3843.72	~genotype	Wald	35S::SLIM1 #25 v Col-0	2.72023	0.00652357	IHW	0.0295617	ashr	0.399507	0.217387
DAS37	AT5G62720	2903.08	~genotype	Wald	35S::SLIM1 #25 v Col-0	0.113786	0.909408	IHW	1	ashr	0.0127682	0.20323
DAS44	AT1G12110	8600.29	~genotype	Wald	slim1-cr v Col-0	-2.21734	0.0265999	IHW	0.075791	ashr	-0.353984	0.215511
DAS44	AT1G12940	454.16	~genotype	Wald	slim1-cr v Col-0	-2.98925	0.00279662	IHW	0.0191018	ashr	-0.585768	0.348846
DAS44	AT1G20640	1042.32	~genotype	Wald	slim1-cr v Col-0	2.06817	0.0386236	IHW	0.0938434	ashr	0.289604	0.177592
DAS44	AT1G22550	246.403	~genotype	Wald	slim1-cr v Col-0	1.17333	0.240664	IHW	0.389618	ashr	0.181153	0.221107
DAS44	AT1G32450	1160.51	~genotype	Wald	slim1-cr v Col-0	0.688252	0.491294	IHW	0.575467	ashr	0.105857	0.23017
DAS44	AT1G52190	2639.05	~genotype	Wald	slim1-cr v Col-0	3.94739	7.90086e-05	IHW	0.00173124	ashr	0.772655	0.262822
DAS44	AT1G64530	585.4	~genotype	Wald	slim1-cr v Col-0	1.61562	0.106177	IHW	0.189114	ashr	0.180884	0.131938
DAS44	AT1G69870	13307.5	~genotype	Wald	slim1-cr v Col-0	-3.62929	0.000284199	IHW	0.00402747	ashr	-0.678787	0.247143
DAS44	AT1G72130	746.502	~genotype	Wald	slim1-cr v Col-0	-1.26838	0.204664	IHW	0.31622	ashr	-0.126561	0.113669
DAS44	AT1G72140	56.8927	~genotype	Wald	slim1-cr v Col-0	-0.854751	0.392689	IHW	0.670708	ashr	-0.129904	0.291362
DAS44	AT1G76350	1194.84	~genotype	Wald	slim1-cr v Col-0	-2.26449	0.0235441	IHW	0.0674351	ashr	-0.282676	0.150624
DAS44	AT2G17150	620.128	~genotype	Wald	slim1-cr v Col-0	0.052037	0.958499	IHW	0.890114	ashr	0.00559116	0.12472
DAS44	AT2G43500	1000.47	~genotype	Wald	slim1-cr v Col-0	1.11795	0.26359	IHW	0.378355	ashr	0.159228	0.189096
DAS44	AT3G16180	700.934	~genotype	Wald	slim1-cr v Col-0	2.08192	0.0373495	IHW	0.0917836	ashr	0.36369	0.267915
DAS44	AT3G21670	3268.51	~genotype	Wald	slim1-cr v Col-0	-4.69567	2.65733e-06	IHW	0.000199857	ashr	-1.07541	0.361484
DAS44	AT3G45650	323.517	~genotype	Wald	slim1-cr v Col-0	-3.33076	0.00086609	IHW	0.0090982	ashr	-0.510227	0.186262
DAS44	AT3G59580	199.502	~genotype	Wald	slim1-cr v Col-0	0.410025	0.681788	IHW	0.927105	ashr	0.059937	0.203324
DAS44	AT3G60320	5717.1	~genotype	Wald	slim1-cr v Col-0	2.39638	0.0165579	IHW	0.0554275	ashr	0.336592	0.175536
DAS44	AT4G21680	1730.52	~genotype	Wald	slim1-cr v Col-0	-3.26205	0.00110611	IHW	0.00950566	ashr	-0.639291	0.288355
DAS44	AT4G24020	3987.43	~genotype	Wald	slim1-cr v Col-0	-2.51005	0.0120715	IHW	0.0431668	ashr	-0.281482	0.130565
DAS44	AT4G35270	587.15	~genotype	Wald	slim1-cr v Col-0	2.01806	0.0435855	IHW	0.117927	ashr	0.312117	0.207584
DAS44	AT4G38340	397.45	~genotype	Wald	slim1-cr v Col-0	-0.432399	0.665452	IHW	0.799938	ashr	-0.0664642	0.263267
DAS44	AT5G14570	2207.05	~genotype	Wald	slim1-cr v Col-0	-0.483134	0.629001	IHW	0.665168	ashr	-0.0628651	0.164264
DAS44	AT5G40890	6965.01	~genotype	Wald	slim1-cr v Col-0	-1.91617	0.0553436	IHW	0.107636	ashr	-0.323162	0.249692
DAS44	AT5G62720	1902.24	~genotype	Wald	slim1-cr v Col-0	0.812033	0.416772	IHW	0.49977	ashr	0.127265	0.245708
DAS44	AT1G12110	8600.29	~genotype	Wald	35S::SLIM1 #17 v Col-0	2.14256	0.0321486	IHW	0.0714845	ashr	0.384016	0.229658
DAS44	AT1G12940	454.16	~genotype	Wald	35S::SLIM1 #17 v Col-0	12.5089	6.67685e-36	IHW	2.02612e-33	ashr	4.63398	0.381014
DAS44	AT1G20640	1042.32	~genotype	Wald	35S::SLIM1 #17 v Col-0	5.80987	6.25224e-09	IHW	8.33317e-08	ashr	1.05805	0.196417
DAS44	AT1G22550	246.403	~genotype	Wald	35S::SLIM1 #17 v Col-0	-2.18614	0.0288051	IHW	0.0586447	ashr	-0.449164	0.279348
DAS44	AT1G32450	1160.51	~genotype	Wald	35S::SLIM1 #17 v Col-0	4.3729	1.22605e-05	IHW	8.59785e-05	ashr	1.26731	0.338962
DAS44	AT1G52190	2639.05	~genotype	Wald	35S::SLIM1 #17 v Col-0	-0.36373	0.71606	IHW	0.809483	ashr	-0.0631151	0.226059
DAS44	AT1G64530	585.4	~genotype	Wald	35S::SLIM1 #17 v Col-0	-4.20643	2.59438e-05	IHW	0.000168217	ashr	-0.557996	0.148313
DAS44	AT1G69870	13307.5	~genotype	Wald	35S::SLIM1 #17 v Col-0	3.09713	0.00195403	IHW	0.00743216	ashr	0.680238	0.284404
DAS44	AT1G72130	746.502	~genotype	Wald	35S::SLIM1 #17 v Col-0	-7.18299	6.8203e-13	IHW	1.99022e-11	ashr	-0.874713	0.127937
DAS44	AT1G72140	56.8927	~genotype	Wald	35S::SLIM1 #17 v Col-0	-1.935	0.05299	IHW	0.0866528	ashr	-0.544641	0.475594
DAS44	AT1G76350	1194.84	~genotype	Wald	35S::SLIM1 #17 v Col-0	7.44206	9.91283e-14	IHW	2.9324e-12	ashr	1.12531	0.157597
DAS44	AT2G17150	620.128	~genotype	Wald	35S::SLIM1 #17 v Col-0	1.65439	0.0980478	IHW	0.199286	ashr	0.198389	0.134288
DAS44	AT2G43500	1000.47	~genotype	Wald	35S::SLIM1 #17 v Col-0	10.6121	2.61759e-26	IHW	3.45605e-24	ashr	2.34539	0.230275
DAS44	AT3G16180	700.934	~genotype	Wald	35S::SLIM1 #17 v Col-0	0.0612453	0.951164	IHW	1	ashr	0.0111926	0.247747
DAS44	AT3G21670	3268.51	~genotype	Wald	35S::SLIM1 #17 v Col-0	-1.76975	0.0767683	IHW	0.145913	ashr	-0.391179	0.322829
DAS44	AT3G45650	323.517	~genotype	Wald	35S::SLIM1 #17 v Col-0	4.59516	4.32416e-06	IHW	2.52541e-05	ashr	0.789613	0.194837
DAS44	AT3G59580	199.502	~genotype	Wald	35S::SLIM1 #17 v Col-0	5.99717	2.00792e-09	IHW	3.63648e-08	ashr	1.5105	0.269761
DAS44	AT3G60320	5717.1	~genotype	Wald	35S::SLIM1 #17 v Col-0	0.191441	0.84818	IHW	0.95147	ashr	0.0264812	0.160913
DAS44	AT4G21680	1730.52	~genotype	Wald	35S::SLIM1 #17 v Col-0	0.0632212	0.94959	IHW	1	ashr	0.0115212	0.246487
DAS44	AT4G24020	3987.43	~genotype	Wald	35S::SLIM1 #17 v Col-0	-2.09761	0.0359401	IHW	0.0778152	ashr	-0.242599	0.128559
DAS44	AT4G35270	587.15	~genotype	Wald	35S::SLIM1 #17 v Col-0	6.86754	6.53162e-12	IHW	1.57312e-10	ashr	1.51292	0.231286
DAS44	AT4G38340	397.45	~genotype	Wald	35S::SLIM1 #17 v Col-0	11.5731	5.64147e-31	IHW	1.40641e-28	ashr	4.63046	0.413854
DAS44	AT5G14570	2207.05	~genotype	Wald	35S::SLIM1 #17 v Col-0	3.68237	0.000231075	IHW	0.00100021	ashr	0.653555	0.2113
DAS44	AT5G40890	6965.01	~genotype	Wald	35S::SLIM1 #17 v Col-0	-7.89169	2.98128e-15	IHW	1.1168e-13	ashr	-2.27216	0.309453
DAS44	AT5G62720	1902.24	~genotype	Wald	35S::SLIM1 #17 v Col-0	-6.44572	1.15056e-10	IHW	2.09411e-09	ashr	-2.14578	0.368197
DAS44	AT1G12110	8600.29	~genotype	Wald	35S::SLIM1 #25 v Col-0	3.15461	0.00160712	IHW	0.00464845	ashr	0.635442	0.250188
DAS44	AT1G12940	454.16	~genotype	Wald	35S::SLIM1 #25 v Col-0	13.03	8.25748e-39	IHW	3.05161e-36	ashr	4.81319	0.390217
DAS44	AT1G20640	1042.32	~genotype	Wald	35S::SLIM1 #25 v Col-0	5.59092	2.25874e-08	IHW	2.08269e-07	ashr	1.02263	0.198174
DAS44	AT1G22550	246.403	~genotype	Wald	35S::SLIM1 #25 v Col-0	-3.29303	0.000991147	IHW	0.00343065	ashr	-0.8029	0.311434
DAS44	AT1G32450	1160.51	~genotype	Wald	35S::SLIM1 #25 v Col-0	5.89756	3.68924e-09	IHW	4.15643e-08	ashr	1.80225	0.327862
DAS44	AT1G52190	2639.05	~genotype	Wald	35S::SLIM1 #25 v Col-0	-3.32005	0.000900029	IHW	0.00324197	ashr	-0.808817	0.310326
DAS44	AT1G64530	585.4	~genotype	Wald	35S::SLIM1 #25 v Col-0	-3.55395	0.000379487	IHW	0.00207853	ashr	-0.463219	0.144771
DAS44	AT1G69870	13307.5	~genotype	Wald	35S::SLIM1 #25 v Col-0	4.53207	5.84093e-06	IHW	2.81866e-05	ashr	1.12794	0.283121
DAS44	AT1G72130	746.502	~genotype	Wald	35S::SLIM1 #25 v Col-0	-9.23791	2.5135e-20	IHW	1.13801e-18	ashr	-1.15331	0.127669
DAS44	AT1G72140	56.8927	~genotype	Wald	35S::SLIM1 #25 v Col-0	-2.67832	0.00739924	IHW	0.0176422	ashr	-0.978799	0.562042
DAS44	AT1G76350	1194.84	~genotype	Wald	35S::SLIM1 #25 v Col-0	8.27093	1.32917e-16	IHW	4.36759e-15	ashr	1.2618	0.15665
DAS44	AT2G17150	620.128	~genotype	Wald	35S::SLIM1 #25 v Col-0	2.17839	0.0293772	IHW	0.05768	ashr	0.271649	0.136642
DAS44	AT2G43500	1000.47	~genotype	Wald	35S::SLIM1 #25 v Col-0	9.38055	6.56292e-21	IHW	3.13766e-19	ashr	2.07891	0.228604
DAS44	AT3G16180	700.934	~genotype	Wald	35S::SLIM1 #25 v Col-0	-0.191942	0.847788	IHW	0.896295	ashr	-0.0374779	0.256472
DAS44	AT3G21670	3268.51	~genotype	Wald	35S::SLIM1 #25 v Col-0	-0.934182	0.35021	IHW	0.571145	ashr	-0.195003	0.285511
DAS44	AT3G45650	323.517	~genotype	Wald	35S::SLIM1 #25 v Col-0	4.36839	1.25167e-05	IHW	6.08209e-05	ashr	0.749294	0.196372
DAS44	AT3G59580	199.502	~genotype	Wald	35S::SLIM1 #25 v Col-0	5.21694	1.81901e-07	IHW	1.33672e-06	ashr	1.32081	0.27536
DAS44	AT3G60320	5717.1	~genotype	Wald	35S::SLIM1 #25 v Col-0	-1.53757	0.124154	IHW	0.178803	ashr	-0.229311	0.17083
DAS44	AT4G21680	1730.52	~genotype	Wald	35S::SLIM1 #25 v Col-0	0.796193	0.42592	IHW	0.489021	ashr	0.158601	0.263942
DAS44	AT4G24020	3987.43	~genotype	Wald	35S::SLIM1 #25 v Col-0	-1.49788	0.134164	IHW	0.264503	ashr	-0.176061	0.126948
DAS44	AT4G35270	587.15	~genotype	Wald	35S::SLIM1 #25 v Col-0	7.69569	1.40734e-14	IHW	4.66867e-13	ashr	1.71717	0.231127
DAS44	AT4G38340	397.45	~genotype	Wald	35S::SLIM1 #25 v Col-0	10.7979	3.52073e-27	IHW	4.40783e-25	ashr	4.26495	0.423857
DAS44	AT5G14570	2207.05	~genotype	Wald	35S::SLIM1 #25 v Col-0	3.44495	0.000571166	IHW	0.0018357	ashr	0.606842	0.2096
DAS44	AT5G40890	6965.01	~genotype	Wald	35S::SLIM1 #25 v Col-0	-8.34771	6.95985e-17	IHW	2.12737e-15	ashr	-2.43448	0.307037
DAS44	AT5G62720	1902.24	~genotype	Wald	35S::SLIM1 #25 v Col-0	-6.91368	4.72238e-12	IHW	7.68698e-11	ashr	-2.35049	0.365848

## Sheet: Figure 5
timepoint	geneID	baseMean	model	test	contrast	stat	pvalue	padjMethod	padj	lfcModeration	log2FoldChange	lfcSE
DAS30	AT1G01240	1473.75	~genotype	Wald	EV v Col-0	0.597725	0.550023	IHW	0.919226	ashr	0.0116845	0.0711581
DAS30	AT1G01355	8.80517	~genotype	Wald	EV v Col-0	-0.0193799	0.984538	IHW	1	ashr	-0.000167725	0.0766074
DAS30	AT1G01500	1105.42	~genotype	Wald	EV v Col-0	-1.98168	0.0475149	IHW	0.468998	ashr	-0.0656226	0.066025
DAS30	AT1G01550	6399.35	~genotype	Wald	EV v Col-0	-0.456979	0.647686	IHW	0.695388	ashr	-0.0151365	0.0559914
DAS30	AT1G01560	467.39	~genotype	Wald	EV v Col-0	-0.129682	0.896818	IHW	1	ashr	-0.00209398	0.0725481
DAS30	AT1G01620	11263.8	~genotype	Wald	EV v Col-0	-0.439863	0.660037	IHW	0.806016	ashr	-0.0123649	0.0635587
DAS30	AT1G01970	1643.81	~genotype	Wald	EV v Col-0	-0.132728	0.894409	IHW	1	ashr	-0.00427422	0.0577402
DAS30	AT1G02390	92.3059	~genotype	Wald	EV v Col-0	-1.63676	0.101681	IHW	0.939892	ashr	-0.0255673	0.0808054
DAS30	AT1G02460	154.188	~genotype	Wald	EV v Col-0	-0.988808	0.322757	IHW	1	ashr	-0.0177235	0.0740829
DAS30	AT1G02470	139.481	~genotype	Wald	EV v Col-0	-1.87262	0.0611214	IHW	0.865613	ashr	-0.0269704	0.0835767
DAS30	AT1G02610	264.177	~genotype	Wald	EV v Col-0	1.16395	0.244446	IHW	1	ashr	0.0165715	0.0770621
DAS30	AT1G02640	1073.84	~genotype	Wald	EV v Col-0	1.01262	0.31124	IHW	0.795022	ashr	0.0218044	0.0716625
DAS30	AT1G02660	559.772	~genotype	Wald	EV v Col-0	1.39806	0.162094	IHW	0.799745	ashr	0.0317216	0.0740979
DAS30	AT1G02740	419.09	~genotype	Wald	EV v Col-0	0.703371	0.481825	IHW	0.987983	ashr	0.0220354	0.0599683
DAS30	AT1G02850	424.751	~genotype	Wald	EV v Col-0	0.440326	0.659701	IHW	1	ashr	0.00391088	0.0767599
DAS30	AT1G03200	53.0201	~genotype	Wald	EV v Col-0	1.83798	0.0660656	IHW	0.879594	ashr	0.0356404	0.0829827
DAS30	AT1G03370	2232.43	~genotype	Wald	EV v Col-0	0.240131	0.810229	IHW	1	ashr	0.00625065	0.0653154
DAS30	AT1G03495	193.046	~genotype	Wald	EV v Col-0	-1.88507	0.0594202	IHW	0.857595	ashr	-0.0420516	0.0824839
DAS30	AT1G03550	291.263	~genotype	Wald	EV v Col-0	0.633983	0.526092	IHW	1	ashr	0.015235	0.067817
DAS30	AT1G03600	18374.8	~genotype	Wald	EV v Col-0	-2.93558	0.00332929	IHW	0.117855	ashr	-0.1123	0.0740524
DAS30	AT1G03630	10984.9	~genotype	Wald	EV v Col-0	-1.65491	0.0979438	IHW	0.479283	ashr	-0.0562675	0.0583883
DAS30	AT1G03730	362.898	~genotype	Wald	EV v Col-0	-1.72293	0.084902	IHW	0.662787	ashr	-0.0498496	0.0709982
DAS30	AT1G03740	2011.52	~genotype	Wald	EV v Col-0	1.43135	0.152329	IHW	0.659035	ashr	0.0393897	0.0692034
DAS30	AT1G03940	228.835	~genotype	Wald	EV v Col-0	-2.04264	0.0410876	IHW	0.739189	ashr	-0.0345485	0.0868154
DAS30	AT1G04070	203.284	~genotype	Wald	EV v Col-0	0.645772	0.518427	IHW	1	ashr	0.0170096	0.0657839
DAS30	AT1G04250	798.724	~genotype	Wald	EV v Col-0	-1.64898	0.0991527	IHW	0.588504	ashr	-0.0475889	0.0699739
DAS30	AT1G04280	972.346	~genotype	Wald	EV v Col-0	1.2683	0.204691	IHW	0.705792	ashr	0.035032	0.0675654
DAS30	AT1G04400	6888.79	~genotype	Wald	EV v Col-0	1.36268	0.172984	IHW	0.682357	ashr	0.0452401	0.0587393
DAS30	AT1G04420	5527.77	~genotype	Wald	EV v Col-0	-1.62643	0.103859	IHW	0.48926	ashr	-0.0536962	0.0613059
DAS30	AT1G04570	117.89	~genotype	Wald	EV v Col-0	-0.0724698	0.942228	IHW	1	ashr	-0.00161206	0.068288
DAS30	AT1G04680	4043.73	~genotype	Wald	EV v Col-0	-1.3793	0.167802	IHW	0.692066	ashr	-0.0415325	0.0650115
DAS30	AT1G04800	4529.27	~genotype	Wald	EV v Col-0	0.103425	0.917626	IHW	1	ashr	0.00211997	0.0695823
DAS30	AT1G04820	14378.8	~genotype	Wald	EV v Col-0	-1.46015	0.144248	IHW	0.638785	ashr	-0.0448702	0.0646743
DAS30	AT1G04920	142.067	~genotype	Wald	EV v Col-0	-0.829299	0.406935	IHW	1	ashr	-0.0201939	0.0682764
DAS30	AT1G04940	3460.33	~genotype	Wald	EV v Col-0	-1.38382	0.166414	IHW	0.689293	ashr	-0.047246	0.055638
DAS30	AT1G04970	1239.35	~genotype	Wald	EV v Col-0	-0.558033	0.576822	IHW	0.929584	ashr	-0.0179762	0.0581391
DAS30	AT1G05060	634.934	~genotype	Wald	EV v Col-0	-1.05401	0.29188	IHW	0.906134	ashr	-0.0362947	0.0517846
DAS30	AT1G05190	16274.4	~genotype	Wald	EV v Col-0	-0.255689	0.798191	IHW	0.869248	ashr	-0.00726279	0.063017
DAS30	AT1G05210	278.361	~genotype	Wald	EV v Col-0	-1.60747	0.107952	IHW	0.794726	ashr	-0.0463341	0.0694502
DAS30	AT1G05560	1390.32	~genotype	Wald	EV v Col-0	-0.349376	0.726807	IHW	1	ashr	-0.00646367	0.0712601
DAS30	AT1G05570	4819.58	~genotype	Wald	EV v Col-0	0.234292	0.814758	IHW	1	ashr	0.00589224	0.0660796
DAS30	AT1G05575	67.5306	~genotype	Wald	EV v Col-0	1.73896	0.0820416	IHW	0.67603	ashr	0.0356734	0.0807163
DAS30	AT1G05783	13.2614	~genotype	Wald	EV v Col-0	-0.815698	0.414673	IHW	1	ashr	-0.00833233	0.0769624
DAS30	AT1G05850	24990.8	~genotype	Wald	EV v Col-0	-4.58247	4.59525e-06	IHW	0.00184087	ashr	-0.223224	0.0864069
DAS30	AT1G06050	332.328	~genotype	Wald	EV v Col-0	-0.22664	0.820703	IHW	1	ashr	-0.00547102	0.0669122
DAS30	AT1G06190	3595.82	~genotype	Wald	EV v Col-0	0.161581	0.871636	IHW	1	ashr	0.00531183	0.0563494
DAS30	AT1G06360	1728.08	~genotype	Wald	EV v Col-0	-2.44958	0.0143022	IHW	0.300763	ashr	-0.0768726	0.0899423
DAS30	AT1G06780	503.102	~genotype	Wald	EV v Col-0	1.14083	0.253941	IHW	0.900655	ashr	0.0336059	0.0643351
DAS30	AT1G07000	1188.72	~genotype	Wald	EV v Col-0	0.158399	0.874142	IHW	1	ashr	0.00356907	0.0681163
DAS30	AT1G07135	666.032	~genotype	Wald	EV v Col-0	-0.33207	0.739836	IHW	1	ashr	-0.00746794	0.068349
DAS30	AT1G07320	20377.9	~genotype	Wald	EV v Col-0	-1.62268	0.104657	IHW	0.597849	ashr	-0.0518247	0.0639029
DAS30	AT1G07530	1472.4	~genotype	Wald	EV v Col-0	1.85098	0.0641727	IHW	0.509108	ashr	0.0642178	0.0571937
DAS30	AT1G07570	543.503	~genotype	Wald	EV v Col-0	0.778692	0.436161	IHW	1	ashr	0.0246691	0.0595701
DAS30	AT1G07620	343.707	~genotype	Wald	EV v Col-0	-0.124125	0.901216	IHW	1	ashr	-0.00194671	0.0728392
DAS30	AT1G07630	1199.97	~genotype	Wald	EV v Col-0	0.42329	0.672084	IHW	0.972476	ashr	0.013402	0.05893
DAS30	AT1G07820	3270.56	~genotype	Wald	EV v Col-0	0.462112	0.644001	IHW	0.980867	ashr	0.0155142	0.0546949
DAS30	AT1G07900	97.6019	~genotype	Wald	EV v Col-0	-1.86967	0.0615295	IHW	0.866902	ashr	-0.0254429	0.0833307
DAS30	AT1G08280	308.485	~genotype	Wald	EV v Col-0	-0.84122	0.400225	IHW	1	ashr	-0.0224849	0.0660725
DAS30	AT1G08520	13163.7	~genotype	Wald	EV v Col-0	-0.512837	0.608065	IHW	0.786422	ashr	-0.0168136	0.0568827
DAS30	AT1G08540	5035	~genotype	Wald	EV v Col-0	0.405336	0.68523	IHW	0.711162	ashr	0.0127063	0.0594179
DAS30	AT1G08620	1189.81	~genotype	Wald	EV v Col-0	1.3857	0.165839	IHW	0.673068	ashr	0.0398916	0.0670367
DAS30	AT1G09230	811.32	~genotype	Wald	EV v Col-0	-0.744398	0.456636	IHW	0.879594	ashr	-0.0231818	0.060363
DAS30	AT1G09480	53.6783	~genotype	Wald	EV v Col-0	0.530042	0.596083	IHW	1	ashr	0.00960843	0.0719307
DAS30	AT1G09560	2914.26	~genotype	Wald	EV v Col-0	-2.76051	0.00577115	IHW	0.226851	ashr	-0.0906188	0.110132
DAS30	AT1G09580	364.56	~genotype	Wald	EV v Col-0	-0.66005	0.509222	IHW	1	ashr	-0.0200188	0.0613429
DAS30	AT1G09645	638.977	~genotype	Wald	EV v Col-0	0.224111	0.822671	IHW	1	ashr	0.00617301	0.0638757
DAS30	AT1G09750	12856.9	~genotype	Wald	EV v Col-0	-3.10062	0.00193114	IHW	0.130052	ashr	-0.122492	0.130433
DAS30	AT1G10030	524.891	~genotype	Wald	EV v Col-0	0.103922	0.917232	IHW	1	ashr	0.00333603	0.0579198
DAS30	AT1G10120	862.296	~genotype	Wald	EV v Col-0	0.158288	0.87423	IHW	1	ashr	0.00446824	0.0631335
DAS30	AT1G10140	265.342	~genotype	Wald	EV v Col-0	-0.19119	0.848377	IHW	1	ashr	-0.00316224	0.0723441
DAS30	AT1G10150	743.123	~genotype	Wald	EV v Col-0	1.13905	0.25468	IHW	0.877353	ashr	0.0355625	0.0616711
DAS30	AT1G10657	889.198	~genotype	Wald	EV v Col-0	0.238362	0.8116	IHW	1	ashr	0.00760129	0.0583636
DAS30	AT1G10670	7508.22	~genotype	Wald	EV v Col-0	-0.413231	0.679438	IHW	0.974906	ashr	-0.0141314	0.0469039
DAS30	AT1G10960	4582.87	~genotype	Wald	EV v Col-0	-2.1717	0.0298784	IHW	0.392469	ashr	-0.0680586	0.0766774
DAS30	AT1G11000	292.468	~genotype	Wald	EV v Col-0	0.966234	0.333927	IHW	0.968553	ashr	0.025672	0.0668051
DAS30	AT1G11210	382.662	~genotype	Wald	EV v Col-0	1.3753	0.169038	IHW	0.810241	ashr	0.0206321	0.0783548
DAS30	AT1G11303	536.369	~genotype	Wald	EV v Col-0	1.39537	0.162903	IHW	0.739189	ashr	0.0432386	0.0636803
DAS30	AT1G11545	793.527	~genotype	Wald	EV v Col-0	-4.89371	9.89512e-07	IHW	0.00184087	ashr	-0.434572	0.142061
DAS30	AT1G11850	1162.47	~genotype	Wald	EV v Col-0	-0.573361	0.5664	IHW	0.946195	ashr	-0.0124473	0.069492
DAS30	AT1G11860	43300.6	~genotype	Wald	EV v Col-0	-1.29579	0.195048	IHW	0.711162	ashr	-0.037381	0.0661978
DAS30	AT1G11870	1632.8	~genotype	Wald	EV v Col-0	-0.761624	0.446284	IHW	0.890165	ashr	-0.0227987	0.0621336
DAS30	AT1G12080	571.035	~genotype	Wald	EV v Col-0	1.87871	0.060284	IHW	0.58836	ashr	0.0484443	0.0788991
DAS30	AT1G12220	755.111	~genotype	Wald	EV v Col-0	1.17221	0.241113	IHW	0.740331	ashr	0.0355244	0.0633002
DAS30	AT1G12290	249.077	~genotype	Wald	EV v Col-0	0.212971	0.831349	IHW	1	ashr	0.00487993	0.0678702
DAS30	AT1G12310	2395.22	~genotype	Wald	EV v Col-0	-0.422006	0.67302	IHW	0.995362	ashr	-0.0114795	0.0644539
DAS30	AT1G12360	2829.09	~genotype	Wald	EV v Col-0	0.495244	0.620428	IHW	1	ashr	0.0154147	0.0598846
DAS30	AT1G12450	377.51	~genotype	Wald	EV v Col-0	-0.0844155	0.932726	IHW	1	ashr	-0.00228939	0.0642101
DAS30	AT1G12460	639.407	~genotype	Wald	EV v Col-0	-1.56684	0.117152	IHW	0.72722	ashr	-0.0518126	0.0606055
DAS30	AT1G12770	2764.18	~genotype	Wald	EV v Col-0	-0.305044	0.760332	IHW	1	ashr	-0.010357	0.0530259
DAS30	AT1G12800	11807.3	~genotype	Wald	EV v Col-0	0.395377	0.692565	IHW	0.712253	ashr	0.0124317	0.0592548
DAS30	AT1G12900	90602.4	~genotype	Wald	EV v Col-0	-2.41488	0.0157405	IHW	0.244062	ashr	-0.0835368	0.0735366
DAS30	AT1G12940	52.8004	~genotype	Wald	EV v Col-0	-0.657231	0.511033	IHW	1	ashr	-0.00681299	0.0765221
DAS30	AT1G12970	453.113	~genotype	Wald	EV v Col-0	0.267081	0.789407	IHW	1	ashr	0.00799424	0.0612598
DAS30	AT1G12990	1474.79	~genotype	Wald	EV v Col-0	0.0127846	0.9898	IHW	1	ashr	0.000352085	0.0637899
DAS30	AT1G13170	1294.98	~genotype	Wald	EV v Col-0	1.01907	0.308169	IHW	0.792846	ashr	0.0330129	0.0589797
DAS30	AT1G13210	5082.8	~genotype	Wald	EV v Col-0	0.0581362	0.95364	IHW	1	ashr	0.00130399	0.0681438
DAS30	AT1G13250	845.948	~genotype	Wald	EV v Col-0	-1.15297	0.248921	IHW	0.760214	ashr	-0.0338274	0.0645658
DAS30	AT1G13260	4051.86	~genotype	Wald	EV v Col-0	1.89095	0.0586304	IHW	0.497351	ashr	0.0507676	0.0777276
DAS30	AT1G13520	84.3968	~genotype	Wald	EV v Col-0	-1.02251	0.306542	IHW	1	ashr	-0.00983834	0.07774
DAS30	AT1G13570	632.084	~genotype	Wald	EV v Col-0	1.24866	0.21179	IHW	0.818228	ashr	0.0378536	0.0637453
DAS30	AT1G13830	71.9962	~genotype	Wald	EV v Col-0	-0.819129	0.412713	IHW	1	ashr	-0.009907	0.0762673
DAS30	AT1G14190	90.9932	~genotype	Wald	EV v Col-0	-0.477708	0.632858	IHW	1	ashr	-0.00928639	0.0708879
DAS30	AT1G14200	554.073	~genotype	Wald	EV v Col-0	1.09702	0.272635	IHW	0.915211	ashr	0.0262649	0.0701719
DAS30	AT1G14270	3262.98	~genotype	Wald	EV v Col-0	-1.93678	0.0527719	IHW	0.490845	ashr	-0.0643707	0.0647766
DAS30	AT1G14290	1272.75	~genotype	Wald	EV v Col-0	-1.3644	0.172442	IHW	0.669421	ashr	-0.042182	0.0635674
DAS30	AT1G14345	3291.56	~genotype	Wald	EV v Col-0	-4.60343	4.15598e-06	IHW	0.00549517	ashr	-0.368816	0.149478
DAS30	AT1G14370	705.907	~genotype	Wald	EV v Col-0	0.00321301	0.997436	IHW	1	ashr	7.03788e-05	0.0685305
DAS30	AT1G14400	4582.74	~genotype	Wald	EV v Col-0	1.15857	0.246631	IHW	0.906781	ashr	0.0386075	0.0573218
DAS30	AT1G14700	439.34	~genotype	Wald	EV v Col-0	-1.4635	0.143329	IHW	0.711875	ashr	-0.0354966	0.0733869
DAS30	AT1G14870	403.6	~genotype	Wald	EV v Col-0	2.40334	0.016246	IHW	0.454766	ashr	0.0729678	0.0900502
DAS30	AT1G15180	1442.14	~genotype	Wald	EV v Col-0	-1.81944	0.0688447	IHW	0.532816	ashr	-0.0576733	0.0670683
DAS30	AT1G15530	723.111	~genotype	Wald	EV v Col-0	-1.1345	0.256587	IHW	0.843371	ashr	-0.0367607	0.0594383
DAS30	AT1G15570	597.408	~genotype	Wald	EV v Col-0	0.0615869	0.950892	IHW	1	ashr	0.00178795	0.0622247
DAS30	AT1G15690	31266.6	~genotype	Wald	EV v Col-0	-1.29752	0.194453	IHW	0.50015	ashr	-0.0438945	0.0563934
DAS30	AT1G15780	2591.86	~genotype	Wald	EV v Col-0	0.492097	0.622651	IHW	0.972852	ashr	0.0143497	0.062481
DAS30	AT1G15820	241178	~genotype	Wald	EV v Col-0	-1.5733	0.115649	IHW	0.425666	ashr	-0.0400173	0.0735826
DAS30	AT1G15830	495.131	~genotype	Wald	EV v Col-0	-0.407791	0.683427	IHW	1	ashr	-0.0081666	0.0703104
DAS30	AT1G15825	125.644	~genotype	Wald	EV v Col-0	-0.141937	0.88713	IHW	1	ashr	-0.00259384	0.071154
DAS30	AT1G15890	219.299	~genotype	Wald	EV v Col-0	0.673209	0.500815	IHW	1	ashr	0.0124414	0.0721642
DAS30	AT1G15910	1126.1	~genotype	Wald	EV v Col-0	2.2837	0.0223892	IHW	0.360769	ashr	0.0781896	0.0696412
DAS30	AT1G15970	585.548	~genotype	Wald	EV v Col-0	-0.741522	0.458377	IHW	0.978925	ashr	-0.0238475	0.0586089
DAS30	AT1G16020	818.206	~genotype	Wald	EV v Col-0	-1.34202	0.17959	IHW	0.674133	ashr	-0.0441787	0.0593435
DAS30	AT1G16110	550.729	~genotype	Wald	EV v Col-0	0.562557	0.573737	IHW	1	ashr	0.0116106	0.0702611
DAS30	AT1G16390	162.172	~genotype	Wald	EV v Col-0	-1.56258	0.118151	IHW	0.794726	ashr	-0.0288649	0.0790788
DAS30	AT1G16540	454.416	~genotype	Wald	EV v Col-0	1.3643	0.172474	IHW	0.787956	ashr	0.0421282	0.0636305
DAS30	AT1G16670	784.985	~genotype	Wald	EV v Col-0	-0.439234	0.660492	IHW	0.955668	ashr	-0.00908945	0.0698974
DAS30	AT1G16920	1053.5	~genotype	Wald	EV v Col-0	-0.269575	0.787487	IHW	1	ashr	-0.00854473	0.0587164
DAS30	AT1G17370	2540.44	~genotype	Wald	EV v Col-0	-0.849567	0.395566	IHW	0.868733	ashr	-0.0292544	0.0492986
DAS30	AT1G17440	2004.94	~genotype	Wald	EV v Col-0	-0.876094	0.380979	IHW	0.873164	ashr	-0.0285026	0.0582144
DAS30	AT1G17550	1996.29	~genotype	Wald	EV v Col-0	-0.494263	0.621121	IHW	1	ashr	-0.015932	0.0580012
DAS30	AT1G17600	676.382	~genotype	Wald	EV v Col-0	-0.138237	0.890053	IHW	1	ashr	-0.00318543	0.0677101
DAS30	AT1G17650	2345.16	~genotype	Wald	EV v Col-0	-2.63066	0.00852191	IHW	0.244062	ashr	-0.0936148	0.0821031
DAS30	AT1G18390	435.656	~genotype	Wald	EV v Col-0	0.614284	0.539028	IHW	1	ashr	0.0161362	0.0657644
DAS30	AT1G18440	795.648	~genotype	Wald	EV v Col-0	-1.01406	0.310556	IHW	0.780528	ashr	-0.0313256	0.0616383
DAS30	AT1G18470	2258.47	~genotype	Wald	EV v Col-0	1.06132	0.288544	IHW	0.795409	ashr	0.0359375	0.0551672
DAS30	AT1G18570	825.22	~genotype	Wald	EV v Col-0	0.41573	0.677608	IHW	0.962217	ashr	0.00934099	0.068515
DAS30	AT1G18620	3392.9	~genotype	Wald	EV v Col-0	1.62321	0.104544	IHW	0.601133	ashr	0.0476882	0.0687656
DAS30	AT1G18750	170.417	~genotype	Wald	EV v Col-0	2.10185	0.0355662	IHW	0.724917	ashr	0.0628558	0.0780045
DAS30	AT1G18860	28.6912	~genotype	Wald	EV v Col-0	-0.199051	0.842223	IHW	1	ashr	-0.00172944	0.0766419
DAS30	AT1G18890	1906.94	~genotype	Wald	EV v Col-0	-0.330241	0.741218	IHW	1	ashr	-0.00969982	0.0620045
DAS30	AT1G18900	736.092	~genotype	Wald	EV v Col-0	0.215955	0.829023	IHW	1	ashr	0.00683923	0.0587251
DAS30	AT1G19020	490.958	~genotype	Wald	EV v Col-0	0.476962	0.633389	IHW	1	ashr	0.00920609	0.0709828
DAS30	AT1G19200	82.3885	~genotype	Wald	EV v Col-0	-1.97198	0.0486116	IHW	0.839656	ashr	-0.0345915	0.0856449
DAS30	AT1G19270	846.95	~genotype	Wald	EV v Col-0	0.913243	0.361115	IHW	0.826851	ashr	0.0235066	0.0673756
DAS30	AT1G19950	470.993	~genotype	Wald	EV v Col-0	-1.87731	0.0604757	IHW	0.557062	ashr	-0.056268	0.0719389
DAS30	AT1G20810	2089.12	~genotype	Wald	EV v Col-0	-1.56319	0.118008	IHW	0.625623	ashr	-0.0522089	0.059625
DAS30	AT1G20840	2922.8	~genotype	Wald	EV v Col-0	-1.35102	0.176688	IHW	0.670554	ashr	-0.0414983	0.0638077
DAS30	AT1G20980	3790.42	~genotype	Wald	EV v Col-0	1.06452	0.287094	IHW	0.945296	ashr	0.0363449	0.0539388
DAS30	AT1G21000	1333.54	~genotype	Wald	EV v Col-0	1.60328	0.108872	IHW	0.592827	ashr	0.0425184	0.0726878
DAS30	AT1G21070	300.361	~genotype	Wald	EV v Col-0	-1.67217	0.0944915	IHW	0.662629	ashr	-0.0540346	0.0635842
DAS30	AT1G21450	1326.81	~genotype	Wald	EV v Col-0	1.13647	0.255761	IHW	0.764328	ashr	0.0330548	0.0648075
DAS30	AT1G21740	312.831	~genotype	Wald	EV v Col-0	1.42489	0.15419	IHW	0.731302	ashr	0.0362511	0.0716434
DAS30	AT1G21830	592.836	~genotype	Wald	EV v Col-0	1.41753	0.156329	IHW	0.768555	ashr	0.0413269	0.0668043
DAS30	AT1G21880	1185.55	~genotype	Wald	EV v Col-0	-1.22424	0.220862	IHW	0.722166	ashr	-0.0314708	0.069395
DAS30	AT1G21910	196.867	~genotype	Wald	EV v Col-0	-1.9729	0.0485068	IHW	0.773278	ashr	-0.0449798	0.0842188
DAS30	AT1G22170	305.258	~genotype	Wald	EV v Col-0	-0.564852	0.572174	IHW	1	ashr	-0.0167076	0.0621133
DAS30	AT1G22280	1935.84	~genotype	Wald	EV v Col-0	0.184878	0.853325	IHW	1	ashr	0.00438976	0.0671928
DAS30	AT1G22570	1106.36	~genotype	Wald	EV v Col-0	0.710815	0.477199	IHW	0.890165	ashr	0.0170636	0.0680982
DAS30	AT1G22800	555.414	~genotype	Wald	EV v Col-0	-0.843941	0.398702	IHW	0.942869	ashr	-0.0266496	0.0599271
DAS30	AT1G22890	844.583	~genotype	Wald	EV v Col-0	-0.455919	0.648449	IHW	0.981166	ashr	-0.00832135	0.0716528
DAS30	AT1G22930	7103.74	~genotype	Wald	EV v Col-0	0.735284	0.462166	IHW	0.897703	ashr	0.02071	0.0641802
DAS30	AT1G23040	234.981	~genotype	Wald	EV v Col-0	-2.98694	0.00281781	IHW	0.319062	ashr	-0.0849697	0.129724
DAS30	AT1G23400	3077.23	~genotype	Wald	EV v Col-0	0.814559	0.415325	IHW	0.890165	ashr	0.0273869	0.0552212
DAS30	AT1G23710	443.721	~genotype	Wald	EV v Col-0	2.0447	0.0408847	IHW	0.528246	ashr	0.0465196	0.0861255
DAS30	AT1G23750	319.519	~genotype	Wald	EV v Col-0	-0.0895317	0.928659	IHW	1	ashr	-0.00247551	0.0636951
DAS30	AT1G23870	1021.15	~genotype	Wald	EV v Col-0	2.10369	0.0354053	IHW	0.438087	ashr	0.0543532	0.0851455
DAS30	AT1G23880	181.74	~genotype	Wald	EV v Col-0	-1.20195	0.229381	IHW	1	ashr	-0.0343619	0.0658635
DAS30	AT1G24140	248.697	~genotype	Wald	EV v Col-0	-0.687825	0.491563	IHW	1	ashr	-0.0117036	0.0731795
DAS30	AT1G24145	689.011	~genotype	Wald	EV v Col-0	-0.518757	0.60393	IHW	1	ashr	-0.00825975	0.0733201
DAS30	AT1G24150	711.955	~genotype	Wald	EV v Col-0	-0.529663	0.596345	IHW	1	ashr	-0.0131295	0.0668815
DAS30	AT1G24490	1409.03	~genotype	Wald	EV v Col-0	-1.11012	0.266946	IHW	0.777106	ashr	-0.03221	0.0647498
DAS30	AT1G24530	346.767	~genotype	Wald	EV v Col-0	-0.435541	0.66317	IHW	1	ashr	-0.0108466	0.0665782
DAS30	AT1G24610	1415.92	~genotype	Wald	EV v Col-0	-0.161418	0.871764	IHW	1	ashr	-0.00500683	0.0597159
DAS30	AT1G25141	68.5847	~genotype	Wald	EV v Col-0	1.81159	0.0700489	IHW	0.917972	ashr	0.0405244	0.0808728
DAS30	AT1G25277	33.6043	~genotype	Wald	EV v Col-0	1.09776	0.27231	IHW	1	ashr	0.018315	0.075517
DAS30	AT1G25290	619.296	~genotype	Wald	EV v Col-0	-1.0937	0.274085	IHW	0.855816	ashr	-0.0338533	0.0618924
DAS30	AT1G25370	265.536	~genotype	Wald	EV v Col-0	-0.629318	0.529141	IHW	1	ashr	-0.0195717	0.0601635
DAS30	AT1G25400	335.551	~genotype	Wald	EV v Col-0	1.7325	0.0831838	IHW	0.659337	ashr	0.0328588	0.0813243
DAS30	AT1G25450	1195.92	~genotype	Wald	EV v Col-0	-4.04004	5.34429e-05	IHW	0.0158216	ashr	-0.275282	0.17075
DAS30	AT1G25500	398.681	~genotype	Wald	EV v Col-0	-1.59682	0.110305	IHW	0.692742	ashr	-0.0479823	0.0672906
DAS30	AT1G25520	1170.89	~genotype	Wald	EV v Col-0	-0.00514517	0.995895	IHW	1	ashr	-0.000173056	0.0541785
DAS30	AT1G25560	2493.68	~genotype	Wald	EV v Col-0	1.59678	0.110314	IHW	0.594282	ashr	0.0313278	0.0789694
DAS30	AT1G26220	936.95	~genotype	Wald	EV v Col-0	-1.79844	0.0721078	IHW	0.536597	ashr	-0.0581117	0.0652267
DAS30	AT1G26570	466.988	~genotype	Wald	EV v Col-0	-1.05376	0.291995	IHW	0.870831	ashr	-0.0335069	0.0602756
DAS30	AT1G26761	1886.34	~genotype	Wald	EV v Col-0	0.359428	0.719275	IHW	1	ashr	0.01191	0.0558458
DAS30	AT1G26800	541.193	~genotype	Wald	EV v Col-0	1.14138	0.253711	IHW	0.858809	ashr	0.024559	0.0726071
DAS30	AT1G26840	203.862	~genotype	Wald	EV v Col-0	-0.83098	0.405985	IHW	1	ashr	-0.0184694	0.0700814
DAS30	AT1G27090	6075.87	~genotype	Wald	EV v Col-0	-0.959983	0.337064	IHW	0.662787	ashr	-0.0330814	0.0506395
DAS30	AT1G27100	2199.7	~genotype	Wald	EV v Col-0	-0.0810158	0.935429	IHW	1	ashr	-0.00208386	0.0654871
DAS30	AT1G27210	1932.61	~genotype	Wald	EV v Col-0	0.471927	0.636979	IHW	0.996228	ashr	0.0136498	0.0627203
DAS30	AT1G27290	1912.54	~genotype	Wald	EV v Col-0	-0.26577	0.790416	IHW	1	ashr	-0.0067354	0.0659459
DAS30	AT1G27460	1479.26	~genotype	Wald	EV v Col-0	-0.465054	0.641893	IHW	0.98005	ashr	-0.0138303	0.0617379
DAS30	AT1G27580	14.0156	~genotype	Wald	EV v Col-0	-1.00858	0.313178	IHW	1	ashr	-0.0111881	0.0773071
DAS30	AT1G27730	843.448	~genotype	Wald	EV v Col-0	-0.0192596	0.984634	IHW	1	ashr	-0.000409174	0.069017
DAS30	AT1G27760	2255.42	~genotype	Wald	EV v Col-0	-0.755308	0.450064	IHW	0.892263	ashr	-0.0213664	0.0641065
DAS30	AT1G27950	4748.82	~genotype	Wald	EV v Col-0	-1.51108	0.130767	IHW	0.635537	ashr	-0.0452515	0.0664977
DAS30	AT1G28010	333.179	~genotype	Wald	EV v Col-0	-0.0099097	0.992093	IHW	1	ashr	-0.000231622	0.0674105
DAS30	AT1G28110	892.451	~genotype	Wald	EV v Col-0	1.80577	0.0709549	IHW	0.527487	ashr	0.0600023	0.0627608
DAS30	AT1G28230	743.521	~genotype	Wald	EV v Col-0	-4.5078	6.55033e-06	IHW	0.00630562	ashr	-0.407717	0.186126
DAS30	AT1G28380	2030.26	~genotype	Wald	EV v Col-0	-0.0485225	0.9613	IHW	1	ashr	-0.00135118	0.0634875
DAS30	AT1G28570	207.27	~genotype	Wald	EV v Col-0	-1.5301	0.125992	IHW	0.995582	ashr	-0.0358174	0.0751201
DAS30	AT1G28600	2098.59	~genotype	Wald	EV v Col-0	-2.34001	0.0192834	IHW	0.351886	ashr	-0.0773724	0.0776044
DAS30	AT1G29070	12603.4	~genotype	Wald	EV v Col-0	-2.34079	0.0192431	IHW	0.351886	ashr	-0.0767786	0.0787409
DAS30	AT1G29290	28.1063	~genotype	Wald	EV v Col-0	-0.778843	0.436072	IHW	1	ashr	-0.0128277	0.0738837
DAS30	AT1G29340	2267	~genotype	Wald	EV v Col-0	-0.346025	0.729324	IHW	1	ashr	-0.0118801	0.0490133
DAS30	AT1G29440	190.8	~genotype	Wald	EV v Col-0	-0.68561	0.492959	IHW	1	ashr	-0.0126654	0.0722165
DAS30	AT1G29690	932.474	~genotype	Wald	EV v Col-0	0.444554	0.656642	IHW	0.966704	ashr	0.0131865	0.0618017
DAS30	AT1G29910	279539	~genotype	Wald	EV v Col-0	-2.22822	0.0258658	IHW	0.287115	ashr	-0.0689366	0.0799858
DAS30	AT1G29970	939.81	~genotype	Wald	EV v Col-0	0.0613245	0.951101	IHW	1	ashr	0.00173841	0.0629715
DAS30	AT1G30220	51.7567	~genotype	Wald	EV v Col-0	-0.244999	0.806457	IHW	1	ashr	-0.00324993	0.0743966
DAS30	AT1G30380	62218.7	~genotype	Wald	EV v Col-0	-0.208552	0.834798	IHW	0.863183	ashr	-0.0055812	0.0646179
DAS30	AT1G30400	7461.11	~genotype	Wald	EV v Col-0	0.910665	0.362472	IHW	0.595435	ashr	0.0300487	0.0572629
DAS30	AT1G30475	238.271	~genotype	Wald	EV v Col-0	0.0568819	0.954639	IHW	1	ashr	0.00158529	0.0634653
DAS30	AT1G30520	1775.75	~genotype	Wald	EV v Col-0	-0.407602	0.683566	IHW	0.995883	ashr	-0.0120589	0.0618437
DAS30	AT1G30690	3190.43	~genotype	Wald	EV v Col-0	0.235405	0.813894	IHW	1	ashr	0.0061451	0.0652443
DAS30	AT1G30755	660.54	~genotype	Wald	EV v Col-0	0.746348	0.455457	IHW	0.973167	ashr	0.0181774	0.0679289
DAS30	AT1G30810	1036.69	~genotype	Wald	EV v Col-0	2.06011	0.0393885	IHW	0.443066	ashr	0.0726504	0.0554893
DAS30	AT1G30970	1920.3	~genotype	Wald	EV v Col-0	0.670096	0.502796	IHW	1	ashr	0.0223924	0.0555302
DAS30	AT1G31130	3130.73	~genotype	Wald	EV v Col-0	-2.29944	0.0214802	IHW	0.364379	ashr	-0.075856	0.0760518
DAS30	AT1G31690	1486.55	~genotype	Wald	EV v Col-0	-1.77694	0.0755775	IHW	0.654659	ashr	-0.0404416	0.0798658
DAS30	AT1G31820	430.133	~genotype	Wald	EV v Col-0	-1.39176	0.163994	IHW	0.739749	ashr	-0.0306359	0.0746122
DAS30	AT1G31860	985.262	~genotype	Wald	EV v Col-0	-1.04767	0.29479	IHW	0.797838	ashr	-0.0302687	0.0645753
DAS30	AT1G32170	164.781	~genotype	Wald	EV v Col-0	0.550045	0.582288	IHW	1	ashr	0.0127311	0.0683002
DAS30	AT1G32200	3966.11	~genotype	Wald	EV v Col-0	-1.40186	0.160957	IHW	0.669421	ashr	-0.0473336	0.0572493
DAS30	AT1G32350	192.031	~genotype	Wald	EV v Col-0	-2.00149	0.0453399	IHW	0.794726	ashr	-0.0236926	0.0840741
DAS30	AT1G32470	14293.8	~genotype	Wald	EV v Col-0	-0.834948	0.403747	IHW	0.85461	ashr	-0.0249176	0.0624783
DAS30	AT1G32530	1565.26	~genotype	Wald	EV v Col-0	1.8481	0.0645877	IHW	0.631839	ashr	0.0619474	0.0624071
DAS30	AT1G32550	2021.85	~genotype	Wald	EV v Col-0	-0.158587	0.873994	IHW	1	ashr	-0.00486114	0.0602364
DAS30	AT1G32990	9842.14	~genotype	Wald	EV v Col-0	-3.03515	0.00240415	IHW	0.0984386	ashr	-0.120165	0.0902075
DAS30	AT1G33030	108.044	~genotype	Wald	EV v Col-0	0.437009	0.662105	IHW	1	ashr	0.0070843	0.0729416
DAS30	AT1G33040	2870.59	~genotype	Wald	EV v Col-0	-0.829276	0.406948	IHW	0.872783	ashr	-0.0283181	0.0530319
DAS30	AT1G33050	2277.82	~genotype	Wald	EV v Col-0	1.65338	0.0982526	IHW	0.590012	ashr	0.0502692	0.0673647
DAS30	AT1G33080	435.881	~genotype	Wald	EV v Col-0	-1.9184	0.0550599	IHW	0.547181	ashr	-0.0607429	0.0689407
DAS30	AT1G33102	46.3402	~genotype	Wald	EV v Col-0	-0.105577	0.915918	IHW	1	ashr	-0.00159035	0.0732165
DAS30	AT1G33110	1731.34	~genotype	Wald	EV v Col-0	0.484493	0.628036	IHW	0.974829	ashr	0.0141489	0.0624173
DAS30	AT1G33290	1416.37	~genotype	Wald	EV v Col-0	-0.812408	0.416558	IHW	0.863183	ashr	-0.0269356	0.0565839
DAS30	AT1G33980	1912.61	~genotype	Wald	EV v Col-0	2.83693	0.00455492	IHW	0.262334	ashr	0.102324	0.0523817
DAS30	AT1G34060	172.194	~genotype	Wald	EV v Col-0	-0.0683599	0.945499	IHW	1	ashr	-0.00114769	0.0721032
DAS30	AT1G34180	177.979	~genotype	Wald	EV v Col-0	1.04322	0.296849	IHW	1	ashr	0.0170019	0.0753683
DAS30	AT1G34260	1461.81	~genotype	Wald	EV v Col-0	-0.28987	0.771915	IHW	1	ashr	-0.00939723	0.0574113
DAS30	AT1G34300	1010.91	~genotype	Wald	EV v Col-0	1.71978	0.0854715	IHW	0.55708	ashr	0.0582898	0.0594699
DAS30	AT1G35140	136.141	~genotype	Wald	EV v Col-0	-0.477105	0.633287	IHW	1	ashr	-0.00788779	0.0728321
DAS30	AT1G35210	195.142	~genotype	Wald	EV v Col-0	-0.693286	0.48813	IHW	1	ashr	-0.0103799	0.0744188
DAS30	AT1G35350	867.839	~genotype	Wald	EV v Col-0	0.142109	0.886994	IHW	1	ashr	0.00371378	0.0651491
DAS30	AT1G35420	3229.37	~genotype	Wald	EV v Col-0	-0.1288	0.897516	IHW	1	ashr	-0.00359871	0.0634171
DAS30	AT1G35680	17271.7	~genotype	Wald	EV v Col-0	-2.27269	0.0230447	IHW	0.364379	ashr	-0.0780339	0.0687116
DAS30	AT1G41830	4038.41	~genotype	Wald	EV v Col-0	-2.30666	0.0210736	IHW	0.372137	ashr	-0.0790995	0.0702508
DAS30	AT1G42970	84586.3	~genotype	Wald	EV v Col-0	-1.82365	0.0682045	IHW	0.414595	ashr	-0.0557372	0.0696734
DAS30	AT1G42990	1731.52	~genotype	Wald	EV v Col-0	0.276613	0.782077	IHW	1	ashr	0.00725233	0.0651831
DAS30	AT1G43560	3912.82	~genotype	Wald	EV v Col-0	-2.40678	0.0160937	IHW	0.328372	ashr	-0.085698	0.0648954
DAS30	AT1G43700	1665.24	~genotype	Wald	EV v Col-0	0.847699	0.396606	IHW	0.872372	ashr	0.0245261	0.0636692
DAS30	AT1G44000	5570.73	~genotype	Wald	EV v Col-0	-2.43588	0.0148556	IHW	0.194729	ashr	-0.0873352	0.0544168
DAS30	AT1G44446	16129.1	~genotype	Wald	EV v Col-0	0.173545	0.862223	IHW	1	ashr	0.00593374	0.051451
DAS30	AT1G44575	70796.3	~genotype	Wald	EV v Col-0	-2.60788	0.00911043	IHW	0.262974	ashr	-0.0906884	0.0864385
DAS30	AT1G44770	1839.45	~genotype	Wald	EV v Col-0	0.445029	0.656299	IHW	0.986909	ashr	0.0117572	0.0652429
DAS30	AT1G44920	3656.84	~genotype	Wald	EV v Col-0	-2.44282	0.014573	IHW	0.32236	ashr	-0.0870578	0.0665699
DAS30	AT1G45150	645.903	~genotype	Wald	EV v Col-0	1.33985	0.180294	IHW	0.798937	ashr	0.0457766	0.0552486
DAS30	AT1G45207	634.159	~genotype	Wald	EV v Col-0	1.37379	0.169508	IHW	0.764328	ashr	0.046484	0.0568159
DAS30	AT1G47210	705.298	~genotype	Wald	EV v Col-0	0.181891	0.855668	IHW	1	ashr	0.0054862	0.0609062
DAS30	AT1G47290	736.677	~genotype	Wald	EV v Col-0	0.0818129	0.934795	IHW	1	ashr	0.00277358	0.05313
DAS30	AT1G47655	126.129	~genotype	Wald	EV v Col-0	-0.559255	0.575988	IHW	1	ashr	-0.0142852	0.0662899
DAS30	AT1G48000	40.6691	~genotype	Wald	EV v Col-0	-1.38007	0.167565	IHW	1	ashr	-0.0159621	0.07901
DAS30	AT1G48350	14608.1	~genotype	Wald	EV v Col-0	-1.35992	0.173855	IHW	0.554106	ashr	-0.0434869	0.061561
DAS30	AT1G48430	1588.95	~genotype	Wald	EV v Col-0	1.17751	0.238994	IHW	0.768527	ashr	0.0363394	0.062464
DAS30	AT1G48480	2479.06	~genotype	Wald	EV v Col-0	-1.81665	0.0692709	IHW	0.639448	ashr	-0.0631774	0.056084
DAS30	AT1G48490	1844.3	~genotype	Wald	EV v Col-0	0.396887	0.691451	IHW	0.998423	ashr	0.0117393	0.0618374
DAS30	AT1G48520	3233.12	~genotype	Wald	EV v Col-0	-0.894658	0.37097	IHW	0.870545	ashr	-0.0295301	0.0571884
DAS30	AT1G48950	761.636	~genotype	Wald	EV v Col-0	0.627876	0.530085	IHW	0.927633	ashr	0.019791	0.059493
DAS30	AT1G49360	463.062	~genotype	Wald	EV v Col-0	0.344007	0.730841	IHW	1	ashr	0.0104595	0.0607174
DAS30	AT1G49380	2733.1	~genotype	Wald	EV v Col-0	-0.446848	0.654985	IHW	0.966258	ashr	-0.0134723	0.0611863
DAS30	AT1G49580	1029.54	~genotype	Wald	EV v Col-0	0.335987	0.736881	IHW	1	ashr	0.00986626	0.062019
DAS30	AT1G49730	1764.32	~genotype	Wald	EV v Col-0	1.21862	0.222988	IHW	0.741589	ashr	0.03914	0.0604328
DAS30	AT1G50570	1506.24	~genotype	Wald	EV v Col-0	1.37967	0.167689	IHW	0.679025	ashr	0.0476311	0.0533068
DAS30	AT1G50575	700.877	~genotype	Wald	EV v Col-0	-0.711309	0.476893	IHW	1	ashr	-0.0219987	0.0606086
DAS30	AT1G50710	817.918	~genotype	Wald	EV v Col-0	1.67474	0.0939847	IHW	0.557003	ashr	0.0583765	0.0528285
DAS30	AT1G50732	932.375	~genotype	Wald	EV v Col-0	-1.59145	0.111508	IHW	0.595435	ashr	-0.0519366	0.0619571
DAS30	AT1G51400	17663.8	~genotype	Wald	EV v Col-0	-0.585619	0.558131	IHW	0.769344	ashr	-0.0168123	0.0631838
DAS30	AT1G51660	968.862	~genotype	Wald	EV v Col-0	-2.14466	0.03198	IHW	0.417848	ashr	-0.0638909	0.0797297
DAS30	AT1G52000	2718.02	~genotype	Wald	EV v Col-0	2.54429	0.01095	IHW	0.286809	ashr	0.0785064	0.0976071
DAS30	AT1G52230	61890.5	~genotype	Wald	EV v Col-0	-2.72677	0.00639582	IHW	0.220468	ashr	-0.0995501	0.0834481
DAS30	AT1G52340	904.79	~genotype	Wald	EV v Col-0	-0.544911	0.585815	IHW	0.922866	ashr	-0.0172983	0.0589643
DAS30	AT1G52670	1885.04	~genotype	Wald	EV v Col-0	-1.20284	0.22904	IHW	0.743152	ashr	-0.0386149	0.0603808
DAS30	AT1G53100	94.8698	~genotype	Wald	EV v Col-0	-0.848276	0.396284	IHW	1	ashr	-0.0102614	0.076367
DAS30	AT1G53250	348.282	~genotype	Wald	EV v Col-0	1.12209	0.261824	IHW	0.906874	ashr	0.0284595	0.0689757
DAS30	AT1G53290	595.268	~genotype	Wald	EV v Col-0	-1.76391	0.0777463	IHW	0.64308	ashr	-0.0602841	0.0588228
DAS30	AT1G53300	2156.02	~genotype	Wald	EV v Col-0	-0.902242	0.366928	IHW	1	ashr	-0.0285556	0.0599836
DAS30	AT1G53430	2043.48	~genotype	Wald	EV v Col-0	1.3507	0.176791	IHW	0.670554	ashr	0.0408505	0.0645746
DAS30	AT1G53780	2969.78	~genotype	Wald	EV v Col-0	0.913464	0.360999	IHW	0.826851	ashr	0.0246982	0.0660618
DAS30	AT1G53910	4910.7	~genotype	Wald	EV v Col-0	-0.0407259	0.967514	IHW	1	ashr	-0.00139014	0.0465293
DAS30	AT1G54090	1119.96	~genotype	Wald	EV v Col-0	-0.0584639	0.953379	IHW	1	ashr	-0.0015729	0.064409
DAS30	AT1G54100	3338.76	~genotype	Wald	EV v Col-0	-0.950948	0.341631	IHW	0.816653	ashr	-0.0245617	0.0674766
DAS30	AT1G54130	4420.59	~genotype	Wald	EV v Col-0	0.537051	0.591233	IHW	0.977006	ashr	0.0127837	0.06773
DAS30	AT1G54210	423.001	~genotype	Wald	EV v Col-0	1.07504	0.282358	IHW	0.87968	ashr	0.0242912	0.0712122
DAS30	AT1G54575	490.358	~genotype	Wald	EV v Col-0	-2.43467	0.0149054	IHW	0.378867	ashr	-0.0464079	0.0969622
DAS30	AT1G54820	2684.63	~genotype	Wald	EV v Col-0	-0.589791	0.55533	IHW	0.92163	ashr	-0.0197167	0.0553391
DAS30	AT1G55110	1208.23	~genotype	Wald	EV v Col-0	0.995188	0.319645	IHW	0.818274	ashr	0.0296663	0.06313
DAS30	AT1G55260	2071.4	~genotype	Wald	EV v Col-0	-1.50955	0.131159	IHW	0.635537	ashr	-0.0463917	0.0651324
DAS30	AT1G55265	550.865	~genotype	Wald	EV v Col-0	-2.91197	0.00359157	IHW	0.210098	ashr	-0.103241	0.118761
DAS30	AT1G55370	1524.62	~genotype	Wald	EV v Col-0	-0.28115	0.778595	IHW	1	ashr	-0.00799416	0.0630096
DAS30	AT1G55490	31123	~genotype	Wald	EV v Col-0	-1.64395	0.100186	IHW	0.482833	ashr	-0.0468505	0.0704727
DAS30	AT1G55690	1210.8	~genotype	Wald	EV v Col-0	1.30182	0.192977	IHW	0.68911	ashr	0.0435144	0.0577397
DAS30	AT1G55730	645.421	~genotype	Wald	EV v Col-0	-0.525912	0.598949	IHW	1	ashr	-0.0151644	0.0629186
DAS30	AT1G55805	695.259	~genotype	Wald	EV v Col-0	0.486995	0.626262	IHW	1	ashr	0.0133769	0.0643042
DAS30	AT1G56010	613.826	~genotype	Wald	EV v Col-0	-2.89214	0.00382629	IHW	0.22886	ashr	-0.105942	0.110278
DAS30	AT1G56140	726.415	~genotype	Wald	EV v Col-0	1.81769	0.0691119	IHW	0.615097	ashr	0.0541236	0.0711479
DAS30	AT1G56145	436.855	~genotype	Wald	EV v Col-0	0.27059	0.786706	IHW	1	ashr	0.0073443	0.0643124
DAS30	AT1G56190	10831.2	~genotype	Wald	EV v Col-0	-3.01338	0.00258357	IHW	0.103941	ashr	-0.118543	0.0889214
DAS30	AT1G56280	10576.2	~genotype	Wald	EV v Col-0	0.842861	0.399306	IHW	0.615178	ashr	0.023462	0.0649107
DAS30	AT1G56460	1391.22	~genotype	Wald	EV v Col-0	1.10884	0.2675	IHW	0.776139	ashr	0.0292336	0.067846
DAS30	AT1G56650	140.491	~genotype	Wald	EV v Col-0	-2.09687	0.0360055	IHW	0.562434	ashr	-0.0368574	0.0880346
DAS30	AT1G57590	88.409	~genotype	Wald	EV v Col-0	-1.40487	0.16006	IHW	0.866448	ashr	-0.0158951	0.0791756
DAS30	AT1G58235	787.067	~genotype	Wald	EV v Col-0	-0.621812	0.534065	IHW	0.914499	ashr	-0.0154879	0.0670247
DAS30	AT1G58420	144.926	~genotype	Wald	EV v Col-0	0.543829	0.586559	IHW	1	ashr	0.009585	0.0723048
DAS30	AT1G59560	321.983	~genotype	Wald	EV v Col-0	-0.590128	0.555105	IHW	1	ashr	-0.0172451	0.0625971
DAS30	AT1G59590	309.149	~genotype	Wald	EV v Col-0	0.138264	0.890032	IHW	1	ashr	0.00271265	0.070225
DAS30	AT1G59620	985.191	~genotype	Wald	EV v Col-0	0.135297	0.892377	IHW	1	ashr	0.0037272	0.0638142
DAS30	AT1G59840	1121.63	~genotype	Wald	EV v Col-0	-1.02019	0.307637	IHW	0.807948	ashr	-0.0309851	0.0624478
DAS30	AT1G59910	836.244	~genotype	Wald	EV v Col-0	-0.382417	0.702152	IHW	0.98395	ashr	-0.0118252	0.060035
DAS30	AT1G60550	3460.9	~genotype	Wald	EV v Col-0	-1.31877	0.187247	IHW	0.700733	ashr	-0.0404122	0.0636945
DAS30	AT1G60600	1961.18	~genotype	Wald	EV v Col-0	-1.43226	0.152071	IHW	0.644195	ashr	-0.0489241	0.0558873
DAS30	AT1G60730	581.608	~genotype	Wald	EV v Col-0	0.863186	0.388035	IHW	0.955668	ashr	0.0218	0.0676036
DAS30	AT1G60790	935.449	~genotype	Wald	EV v Col-0	-1.11339	0.265543	IHW	0.775301	ashr	-0.0367169	0.0580381
DAS30	AT1G60900	3002.52	~genotype	Wald	EV v Col-0	2.2637	0.0235924	IHW	0.376405	ashr	0.0782346	0.0464687
DAS30	AT1G60950	80016.1	~genotype	Wald	EV v Col-0	-4.90595	9.29751e-07	IHW	0.00124186	ashr	-0.490775	0.162759
DAS30	AT1G61170	428.072	~genotype	Wald	EV v Col-0	0.392719	0.694527	IHW	1	ashr	0.00978426	0.0664916
DAS30	AT1G61800	381.166	~genotype	Wald	EV v Col-0	-2.00389	0.0450823	IHW	0.60795	ashr	-0.033783	0.0861098
DAS30	AT1G62422	439.521	~genotype	Wald	EV v Col-0	0.375081	0.7076	IHW	1	ashr	0.00911018	0.0669872
DAS30	AT1G62480	8079.63	~genotype	Wald	EV v Col-0	0.327111	0.743584	IHW	0.83394	ashr	0.00806517	0.0666074
DAS30	AT1G62810	1495.37	~genotype	Wald	EV v Col-0	0.303002	0.761888	IHW	1	ashr	0.0100213	0.0559555
DAS30	AT1G63010	2484.83	~genotype	Wald	EV v Col-0	-1.86744	0.0618399	IHW	0.626436	ashr	-0.0648371	0.0572644
DAS30	AT1G63110	1217.11	~genotype	Wald	EV v Col-0	0.117344	0.906588	IHW	1	ashr	0.00387666	0.0559412
DAS30	AT1G63350	347.929	~genotype	Wald	EV v Col-0	0.858008	0.390888	IHW	1	ashr	0.0209373	0.0683615
DAS30	AT1G63370	49.4493	~genotype	Wald	EV v Col-0	-1.37833	0.168102	IHW	1	ashr	-0.0254937	0.0769177
DAS30	AT1G63840	375.591	~genotype	Wald	EV v Col-0	-2.18272	0.0290564	IHW	0.457039	ashr	-0.0465764	0.0904958
DAS30	AT1G64065	132.616	~genotype	Wald	EV v Col-0	-0.258969	0.795659	IHW	1	ashr	-0.00439643	0.0721365
DAS30	AT1G64150	2208.87	~genotype	Wald	EV v Col-0	-0.953527	0.340323	IHW	0.835568	ashr	-0.0282235	0.0632359
DAS30	AT1G64280	2099.33	~genotype	Wald	EV v Col-0	1.28452	0.198959	IHW	0.714157	ashr	0.035319	0.0678512
DAS30	AT1G64355	1464.37	~genotype	Wald	EV v Col-0	-0.253793	0.799655	IHW	1	ashr	-0.00840388	0.0558164
DAS30	AT1G64510	11423.4	~genotype	Wald	EV v Col-0	-2.35144	0.0187011	IHW	0.263476	ashr	-0.0813463	0.0703968
DAS30	AT1G64610	461.142	~genotype	Wald	EV v Col-0	-0.173631	0.862156	IHW	1	ashr	-0.00403787	0.0675697
DAS30	AT1G64670	610.623	~genotype	Wald	EV v Col-0	-0.0671305	0.946478	IHW	1	ashr	-0.00177048	0.0649017
DAS30	AT1G64780	482.53	~genotype	Wald	EV v Col-0	-0.267392	0.789167	IHW	1	ashr	-0.00375484	0.0739725
DAS30	AT1G64840	533.75	~genotype	Wald	EV v Col-0	-0.782553	0.43389	IHW	1	ashr	-0.0243386	0.0605262
DAS30	AT1G64860	6469.5	~genotype	Wald	EV v Col-0	0.405606	0.685032	IHW	0.831103	ashr	0.01367	0.0541716
DAS30	AT1G64950	1935.7	~genotype	Wald	EV v Col-0	-0.99391	0.320267	IHW	0.799	ashr	-0.0243631	0.0689753
DAS30	AT1G64970	1623.09	~genotype	Wald	EV v Col-0	-1.32763	0.184301	IHW	0.695388	ashr	-0.0386537	0.0660793
DAS30	AT1G65010	2783.33	~genotype	Wald	EV v Col-0	1.09914	0.271707	IHW	0.795245	ashr	0.0316039	0.0650229
DAS30	AT1G65250	362.087	~genotype	Wald	EV v Col-0	0.535535	0.59228	IHW	1	ashr	0.0140678	0.0655683
DAS30	AT1G65690	471.235	~genotype	Wald	EV v Col-0	-1.25351	0.210021	IHW	0.863183	ashr	-0.0149212	0.0782397
DAS30	AT1G65790	970.669	~genotype	Wald	EV v Col-0	0.317063	0.751196	IHW	0.988382	ashr	0.00598418	0.0709489
DAS30	AT1G65820	3460.39	~genotype	Wald	EV v Col-0	-0.421971	0.673046	IHW	1	ashr	-0.0137802	0.0570463
DAS30	AT1G66050	163.943	~genotype	Wald	EV v Col-0	-0.404011	0.686205	IHW	1	ashr	-0.0105761	0.0653947
DAS30	AT1G66090	378.876	~genotype	Wald	EV v Col-0	-0.33625	0.736683	IHW	1	ashr	-0.00622659	0.0712252
DAS30	AT1G66190	233.657	~genotype	Wald	EV v Col-0	-0.30705	0.758805	IHW	1	ashr	-0.00759204	0.0665212
DAS30	AT1G66430	3266.6	~genotype	Wald	EV v Col-0	-2.09117	0.036513	IHW	0.534751	ashr	-0.0738496	0.0527356
DAS30	AT1G67090	565257	~genotype	Wald	EV v Col-0	-2.90131	0.00371611	IHW	0.121062	ashr	-0.110628	0.091561
DAS30	AT1G67180	189.743	~genotype	Wald	EV v Col-0	2.05392	0.0399834	IHW	0.585222	ashr	0.0614459	0.0764835
DAS30	AT1G67650	79.5379	~genotype	Wald	EV v Col-0	-0.267464	0.789112	IHW	1	ashr	-0.00476305	0.071598
DAS30	AT1G67700	13115.4	~genotype	Wald	EV v Col-0	-1.13652	0.255739	IHW	0.631979	ashr	-0.0345524	0.0629606
DAS30	AT1G67830	979.599	~genotype	Wald	EV v Col-0	-0.614382	0.538963	IHW	0.904665	ashr	-0.0167154	0.0648502
DAS30	AT1G67910	191.896	~genotype	Wald	EV v Col-0	0.694193	0.487561	IHW	1	ashr	0.0167348	0.0679522
DAS30	AT1G67920	113.916	~genotype	Wald	EV v Col-0	0.16606	0.86811	IHW	1	ashr	0.00215646	0.0744861
DAS30	AT1G68000	1346.05	~genotype	Wald	EV v Col-0	-0.00455988	0.996362	IHW	1	ashr	-0.000141948	0.0595115
DAS30	AT1G68060	2374.44	~genotype	Wald	EV v Col-0	2.523	0.0116359	IHW	0.286809	ashr	0.091148	0.0650364
DAS30	AT1G68110	202.24	~genotype	Wald	EV v Col-0	-0.974442	0.329837	IHW	1	ashr	-0.0228449	0.0698251
DAS30	AT1G68190	1775.55	~genotype	Wald	EV v Col-0	0.808181	0.418986	IHW	0.892263	ashr	0.0187596	0.0691648
DAS30	AT1G68520	7709.88	~genotype	Wald	EV v Col-0	1.82169	0.0685027	IHW	0.414873	ashr	0.0622865	0.059472
DAS30	AT1G68640	124.081	~genotype	Wald	EV v Col-0	2.53559	0.0112258	IHW	0.514033	ashr	0.0739046	0.100332
DAS30	AT1G68690	317.985	~genotype	Wald	EV v Col-0	-0.738153	0.460422	IHW	1	ashr	-0.0191755	0.0664218
DAS30	AT1G68840	2571.94	~genotype	Wald	EV v Col-0	1.07	0.28462	IHW	0.773278	ashr	0.0276921	0.0681028
DAS30	AT1G68890	3853.76	~genotype	Wald	EV v Col-0	0.0134319	0.989283	IHW	1	ashr	0.000400792	0.0612644
DAS30	AT1G69270	535.799	~genotype	Wald	EV v Col-0	0.608798	0.542658	IHW	1	ashr	0.013985	0.0686113
DAS30	AT1G69310	466.375	~genotype	Wald	EV v Col-0	-1.68631	0.0917363	IHW	0.631839	ashr	-0.0467651	0.072301
DAS30	AT1G69420	2626.17	~genotype	Wald	EV v Col-0	1.00223	0.316232	IHW	0.96953	ashr	0.034287	0.0532977
DAS30	AT1G69450	1159.4	~genotype	Wald	EV v Col-0	0.00397043	0.996832	IHW	1	ashr	0.000128485	0.0574123
DAS30	AT1G69480	64.9206	~genotype	Wald	EV v Col-0	-1.36883	0.171052	IHW	0.839656	ashr	-0.0198475	0.0784393
DAS30	AT1G69490	753.195	~genotype	Wald	EV v Col-0	-0.743018	0.457471	IHW	0.996584	ashr	-0.0118026	0.0740824
DAS30	AT1G69640	1682.87	~genotype	Wald	EV v Col-0	-1.04486	0.296088	IHW	0.953326	ashr	-0.0357826	0.053266
DAS30	AT1G69700	1216.37	~genotype	Wald	EV v Col-0	-0.57484	0.565399	IHW	0.947261	ashr	-0.0193134	0.0547823
DAS30	AT1G69810	52.6243	~genotype	Wald	EV v Col-0	0.0379721	0.96971	IHW	1	ashr	0.000727647	0.0704989
DAS30	AT1G69830	9290.11	~genotype	Wald	EV v Col-0	1.08546	0.277719	IHW	0.641088	ashr	0.0352034	0.0591647
DAS30	AT1G69840	2627.31	~genotype	Wald	EV v Col-0	-0.0456865	0.96356	IHW	1	ashr	-0.00103041	0.0680468
DAS30	AT1G69870	3036.95	~genotype	Wald	EV v Col-0	-0.259087	0.795568	IHW	1	ashr	-0.00736783	0.0629848
DAS30	AT1G69890	523.721	~genotype	Wald	EV v Col-0	1.59305	0.111148	IHW	0.674161	ashr	0.0284004	0.0797368
DAS30	AT1G69900	125.16	~genotype	Wald	EV v Col-0	0.0692653	0.944778	IHW	1	ashr	0.00162701	0.0673296
DAS30	AT1G70150	294.614	~genotype	Wald	EV v Col-0	0.995246	0.319617	IHW	0.957911	ashr	0.0305754	0.0618229
DAS30	AT1G70290	4453.36	~genotype	Wald	EV v Col-0	1.09247	0.274627	IHW	0.798008	ashr	0.0271842	0.0692466
DAS30	AT1G70370	7357.88	~genotype	Wald	EV v Col-0	0.106564	0.915135	IHW	1	ashr	0.0035461	0.0553069
DAS30	AT1G70520	1706.16	~genotype	Wald	EV v Col-0	0.572914	0.566703	IHW	0.927146	ashr	0.0138715	0.0674845
DAS30	AT1G70530	1403.12	~genotype	Wald	EV v Col-0	3.06893	0.00214829	IHW	0.194729	ashr	0.12286	0.0930684
DAS30	AT1G70710	1714.25	~genotype	Wald	EV v Col-0	1.41093	0.158266	IHW	0.808564	ashr	0.0304586	0.0751842
DAS30	AT1G71020	1356.56	~genotype	Wald	EV v Col-0	0.959581	0.337266	IHW	0.847312	ashr	0.0273615	0.064618
DAS30	AT1G71040	3558.84	~genotype	Wald	EV v Col-0	0.118515	0.90566	IHW	1	ashr	0.00372646	0.0590482
DAS30	AT1G71790	432.289	~genotype	Wald	EV v Col-0	0.818551	0.413042	IHW	0.947261	ashr	0.0238939	0.063255
DAS30	AT1G71800	614.605	~genotype	Wald	EV v Col-0	0.580069	0.561868	IHW	1	ashr	0.0191099	0.0566191
DAS30	AT1G71910	93.7054	~genotype	Wald	EV v Col-0	-0.559345	0.575926	IHW	1	ashr	-0.00905343	0.0732701
DAS30	AT1G72150	18379.8	~genotype	Wald	EV v Col-0	1.26095	0.207326	IHW	0.708096	ashr	0.0308882	0.0709611
DAS30	AT1G72170	972.935	~genotype	Wald	EV v Col-0	-1.60058	0.10947	IHW	0.605645	ashr	-0.0529987	0.0607896
DAS30	AT1G72410	1716.78	~genotype	Wald	EV v Col-0	1.18095	0.237622	IHW	0.74922	ashr	0.0326025	0.0669329
DAS30	AT1G72640	2239.02	~genotype	Wald	EV v Col-0	0.00432134	0.996552	IHW	1	ashr	0.000107462	0.0662033
DAS30	AT1G72800	213.832	~genotype	Wald	EV v Col-0	-1.81744	0.0691496	IHW	0.872392	ashr	-0.0498897	0.0751676
DAS30	AT1G72840	248.715	~genotype	Wald	EV v Col-0	0.872515	0.382927	IHW	1	ashr	0.0247777	0.0643918
DAS30	AT1G72900	1091.93	~genotype	Wald	EV v Col-0	0.598939	0.549214	IHW	0.908356	ashr	0.0123617	0.0703743
DAS30	AT1G72930	5592.83	~genotype	Wald	EV v Col-0	-0.313223	0.754111	IHW	0.837689	ashr	-0.00786504	0.0662037
DAS30	AT1G73040	53.1212	~genotype	Wald	EV v Col-0	-0.796758	0.425591	IHW	1	ashr	-0.00993126	0.0760346
DAS30	AT1G73060	5448.72	~genotype	Wald	EV v Col-0	-2.31896	0.0203974	IHW	0.21857	ashr	-0.0815328	0.06513
DAS30	AT1G73130	307.978	~genotype	Wald	EV v Col-0	1.76713	0.0772058	IHW	0.703348	ashr	0.054548	0.0680838
DAS30	AT1G73500	1148.87	~genotype	Wald	EV v Col-0	0.682233	0.495092	IHW	0.913951	ashr	0.0195076	0.0635494
DAS30	AT1G73655	6336.92	~genotype	Wald	EV v Col-0	-1.04445	0.296279	IHW	0.780615	ashr	-0.0230326	0.0714544
DAS30	AT1G73700	114.45	~genotype	Wald	EV v Col-0	-0.176991	0.859516	IHW	1	ashr	-0.00392396	0.0684047
DAS30	AT1G73810	300.99	~genotype	Wald	EV v Col-0	-0.630188	0.528572	IHW	1	ashr	-0.00974528	0.0739233
DAS30	AT1G74010	159.302	~genotype	Wald	EV v Col-0	-1.35961	0.173954	IHW	1	ashr	-0.0148974	0.0789452
DAS30	AT1G74020	466.574	~genotype	Wald	EV v Col-0	-1.85651	0.0633805	IHW	0.563027	ashr	-0.0459337	0.0796336
DAS30	AT1G74470	88630.2	~genotype	Wald	EV v Col-0	-1.28669	0.198203	IHW	0.713104	ashr	-0.0436331	0.0560269
DAS30	AT1G74690	3471.81	~genotype	Wald	EV v Col-0	1.47604	0.139934	IHW	0.64308	ashr	0.0509152	0.0543478
DAS30	AT1G74720	1715.58	~genotype	Wald	EV v Col-0	-0.0198453	0.984167	IHW	1	ashr	-0.000552522	0.0634891
DAS30	AT1G74790	1085.4	~genotype	Wald	EV v Col-0	0.748272	0.454296	IHW	0.870831	ashr	0.0225504	0.0618263
DAS30	AT1G74810	159.647	~genotype	Wald	EV v Col-0	1.24962	0.211439	IHW	1	ashr	0.029873	0.0714353
DAS30	AT1G74940	1173.32	~genotype	Wald	EV v Col-0	0.630864	0.52813	IHW	0.928064	ashr	0.0199604	0.0593001
DAS30	AT1G74970	9619	~genotype	Wald	EV v Col-0	-3.08069	0.00206522	IHW	0.0956568	ashr	-0.123579	0.0919741
DAS30	AT1G75020	469.745	~genotype	Wald	EV v Col-0	-0.59029	0.554996	IHW	1	ashr	-0.0157366	0.0653286
DAS30	AT1G75030	382.162	~genotype	Wald	EV v Col-0	0.522641	0.601224	IHW	1	ashr	0.0102757	0.070851
DAS30	AT1G75120	231.701	~genotype	Wald	EV v Col-0	0.64193	0.520919	IHW	1	ashr	0.0163349	0.0666034
DAS30	AT1G75350	10045.5	~genotype	Wald	EV v Col-0	-0.142178	0.88694	IHW	0.762762	ashr	-0.00409291	0.0625245
DAS30	AT1G75380	18632.4	~genotype	Wald	EV v Col-0	0.835185	0.403614	IHW	0.618337	ashr	0.0153326	0.0729499
DAS30	AT1G75680	3807.99	~genotype	Wald	EV v Col-0	-2.11665	0.0342893	IHW	0.528246	ashr	-0.074881	0.054856
DAS30	AT1G75690	9667.35	~genotype	Wald	EV v Col-0	-0.930648	0.352036	IHW	0.670387	ashr	-0.0273623	0.0634001
DAS30	AT1G76110	1745.37	~genotype	Wald	EV v Col-0	0.205385	0.837271	IHW	1	ashr	0.00436192	0.0691231
DAS30	AT1G76360	1372.81	~genotype	Wald	EV v Col-0	-0.718554	0.472416	IHW	0.906059	ashr	-0.0228615	0.0591853
DAS30	AT1G76405	557.942	~genotype	Wald	EV v Col-0	1.07566	0.282079	IHW	0.898667	ashr	0.0308658	0.0649678
DAS30	AT1G76450	4421.58	~genotype	Wald	EV v Col-0	-0.281544	0.778293	IHW	1	ashr	-0.00780348	0.0637561
DAS30	AT1G76520	2809.56	~genotype	Wald	EV v Col-0	0.454333	0.649589	IHW	1	ashr	0.010043	0.0688774
DAS30	AT1G76710	573.649	~genotype	Wald	EV v Col-0	2.10008	0.0357219	IHW	0.48377	ashr	0.0700533	0.0678472
DAS30	AT1G76820	287.278	~genotype	Wald	EV v Col-0	0.354945	0.722631	IHW	1	ashr	0.00955382	0.0646297
DAS30	AT1G76870	113.164	~genotype	Wald	EV v Col-0	1.01059	0.312212	IHW	1	ashr	0.0238916	0.06987
DAS30	AT1G76955	178.401	~genotype	Wald	EV v Col-0	-0.664881	0.506127	IHW	1	ashr	-0.0125934	0.071818
DAS30	AT1G77090	2550.52	~genotype	Wald	EV v Col-0	-0.644463	0.519275	IHW	0.924488	ashr	-0.0196382	0.0611106
DAS30	AT1G77500	596.171	~genotype	Wald	EV v Col-0	-1.06452	0.287091	IHW	0.87103	ashr	-0.0343387	0.0594384
DAS30	AT1G77590	2583.04	~genotype	Wald	EV v Col-0	-0.474379	0.63523	IHW	0.995282	ashr	-0.0144018	0.0609485
DAS30	AT1G77640	27.1605	~genotype	Wald	EV v Col-0	-2.24338	0.0248724	IHW	0.487075	ashr	-0.0335936	0.0894096
DAS30	AT1G77920	733.092	~genotype	Wald	EV v Col-0	-2.158	0.0309279	IHW	0.464445	ashr	-0.0679052	0.0758254
DAS30	AT1G78180	738.115	~genotype	Wald	EV v Col-0	0.623783	0.53277	IHW	1	ashr	0.0210986	0.0540521
DAS30	AT1G78190	68.4575	~genotype	Wald	EV v Col-0	-0.535364	0.592398	IHW	1	ashr	-0.0107765	0.0705523
DAS30	AT1G78260	359.327	~genotype	Wald	EV v Col-0	-2.40559	0.0161464	IHW	0.372106	ashr	-0.0705715	0.0924732
DAS30	AT1G78420	1118.27	~genotype	Wald	EV v Col-0	0.801455	0.422868	IHW	0.854157	ashr	0.0270359	0.0547992
DAS30	AT1G78430	318.716	~genotype	Wald	EV v Col-0	1.49484	0.134957	IHW	0.846638	ashr	0.0384644	0.0721601
DAS30	AT1G78630	20204.3	~genotype	Wald	EV v Col-0	-1.91759	0.0551625	IHW	0.499823	ashr	-0.0658728	0.0601039
DAS30	AT1G78670	1455.26	~genotype	Wald	EV v Col-0	-0.740811	0.458808	IHW	0.896203	ashr	-0.016411	0.0697392
DAS30	AT1G78780	57.4609	~genotype	Wald	EV v Col-0	0.0910514	0.927452	IHW	1	ashr	0.00111792	0.0748417
DAS30	AT1G78915	1763.02	~genotype	Wald	EV v Col-0	0.146999	0.883133	IHW	1	ashr	0.00498948	0.0529623
DAS30	AT1G79270	1153.56	~genotype	Wald	EV v Col-0	-1.54194	0.123087	IHW	0.616108	ashr	-0.0446848	0.0683809
DAS30	AT1G79380	3435.93	~genotype	Wald	EV v Col-0	0.162255	0.871105	IHW	1	ashr	0.00381821	0.0673437
DAS30	AT1G79500	923.12	~genotype	Wald	EV v Col-0	0.300032	0.764152	IHW	1	ashr	0.00938901	0.0593927
DAS30	AT1G79610	867.026	~genotype	Wald	EV v Col-0	0.893711	0.371476	IHW	0.824284	ashr	0.0299375	0.0558391
DAS30	AT1G79700	403.584	~genotype	Wald	EV v Col-0	0.829514	0.406813	IHW	0.990732	ashr	0.0151866	0.0729556
DAS30	AT1G79850	12454	~genotype	Wald	EV v Col-0	-2.79293	0.00522333	IHW	0.204269	ashr	-0.103159	0.0886894
DAS30	AT1G80010	930.191	~genotype	Wald	EV v Col-0	0.423328	0.672056	IHW	0.972476	ashr	0.0134198	0.0588642
DAS30	AT1G80030	3111.46	~genotype	Wald	EV v Col-0	-1.33195	0.182878	IHW	0.711875	ashr	-0.0425246	0.0614781
DAS30	AT1G80080	656.274	~genotype	Wald	EV v Col-0	-0.576397	0.564347	IHW	1	ashr	-0.0152374	0.0655081
DAS30	AT1G80160	162.121	~genotype	Wald	EV v Col-0	-0.100116	0.920252	IHW	1	ashr	-0.000826174	0.076788
DAS30	AT1G80180	2880.64	~genotype	Wald	EV v Col-0	1.46815	0.142065	IHW	0.635537	ashr	0.0354083	0.073586
DAS30	AT1G80300	4182.02	~genotype	Wald	EV v Col-0	-1.18337	0.236663	IHW	0.748115	ashr	-0.0327275	0.0668911
DAS30	AT1G80350	1180.56	~genotype	Wald	EV v Col-0	0.412657	0.679858	IHW	0.993264	ashr	0.0139524	0.0537642
DAS30	AT1G80510	833.27	~genotype	Wald	EV v Col-0	-0.53424	0.593176	IHW	0.939081	ashr	-0.0160189	0.0615431
DAS30	AT1G80610	355.952	~genotype	Wald	EV v Col-0	0.25533	0.798468	IHW	1	ashr	0.00725332	0.0630136
DAS30	AT1G80690	255.456	~genotype	Wald	EV v Col-0	-0.813286	0.416054	IHW	1	ashr	-0.0214559	0.066309
DAS30	AT1G80840	307.907	~genotype	Wald	EV v Col-0	0.118627	0.905571	IHW	1	ashr	0.0019244	0.0724931
DAS30	AT1G80910	967.723	~genotype	Wald	EV v Col-0	-0.52256	0.60128	IHW	0.928824	ashr	-0.0179485	0.0501258
DAS30	AT2G01450	3871.81	~genotype	Wald	EV v Col-0	0.444717	0.656524	IHW	0.987042	ashr	0.0133847	0.0612517
DAS30	AT2G01600	2316.32	~genotype	Wald	EV v Col-0	0.258365	0.796125	IHW	1	ashr	0.00865697	0.0546985
DAS30	AT2G01755	419.126	~genotype	Wald	EV v Col-0	0.162934	0.870571	IHW	1	ashr	0.00307578	0.0707585
DAS30	AT2G01818	66.321	~genotype	Wald	EV v Col-0	0.67739	0.498159	IHW	1	ashr	0.0142663	0.070334
DAS30	AT2G01820	4912.78	~genotype	Wald	EV v Col-0	0.466046	0.641183	IHW	0.819075	ashr	0.0159209	0.0520472
DAS30	AT2G01850	4250.24	~genotype	Wald	EV v Col-0	-1.09462	0.273684	IHW	0.929329	ashr	-0.0330434	0.0630632
DAS30	AT2G02130	3334.52	~genotype	Wald	EV v Col-0	-1.82331	0.0682571	IHW	0.54078	ashr	-0.0565929	0.0686452
DAS30	AT2G02170	753.108	~genotype	Wald	EV v Col-0	1.75746	0.0788402	IHW	0.624586	ashr	0.0582754	0.0623435
DAS30	AT2G02370	424.907	~genotype	Wald	EV v Col-0	-0.271649	0.785892	IHW	1	ashr	-0.00789564	0.0623017
DAS30	AT2G02390	1580.54	~genotype	Wald	EV v Col-0	-0.308171	0.757952	IHW	1	ashr	-0.00771581	0.066259
DAS30	AT2G02410	641.484	~genotype	Wald	EV v Col-0	0.049406	0.960596	IHW	1	ashr	0.00123485	0.0661026
DAS30	AT2G02500	1192.52	~genotype	Wald	EV v Col-0	-1.79777	0.0722136	IHW	0.528974	ashr	-0.0628458	0.0536869
DAS30	AT2G02710	1868.44	~genotype	Wald	EV v Col-0	1.59121	0.111562	IHW	0.614493	ashr	0.0366285	0.0763862
DAS30	AT2G02950	761.614	~genotype	Wald	EV v Col-0	0.47527	0.634595	IHW	0.976712	ashr	0.0110666	0.0680015
DAS30	AT2G03280	368.81	~genotype	Wald	EV v Col-0	0.0288767	0.976963	IHW	1	ashr	0.000698626	0.0667594
DAS30	AT2G03350	1328.2	~genotype	Wald	EV v Col-0	-0.719423	0.47188	IHW	0.88762	ashr	-0.0224447	0.0602126
DAS30	AT2G03420	2197.47	~genotype	Wald	EV v Col-0	-2.75142	0.00593377	IHW	0.211631	ashr	-0.100252	0.0884662
DAS30	AT2G03530	1049.7	~genotype	Wald	EV v Col-0	0.885233	0.376031	IHW	0.825876	ashr	0.0260697	0.0631642
DAS30	AT2G04495	215.551	~genotype	Wald	EV v Col-0	-0.295103	0.767915	IHW	1	ashr	-0.0042169	0.0738623
DAS30	AT2G04780	1973.4	~genotype	Wald	EV v Col-0	-3.90302	9.49979e-05	IHW	0.0347462	ashr	-0.23866	0.156024
DAS30	AT2G05210	814.371	~genotype	Wald	EV v Col-0	0.393254	0.694132	IHW	0.999499	ashr	0.0129637	0.0563089
DAS30	AT2G05790	4526.22	~genotype	Wald	EV v Col-0	-0.828402	0.407443	IHW	0.872867	ashr	-0.0246561	0.0625618
DAS30	AT2G05990	4894.54	~genotype	Wald	EV v Col-0	0.434103	0.664213	IHW	0.807497	ashr	0.0142594	0.0566338
DAS30	AT2G06850	7506.54	~genotype	Wald	EV v Col-0	-1.5091	0.131274	IHW	0.447918	ashr	-0.0420852	0.0695846
DAS30	AT2G07050	5357.02	~genotype	Wald	EV v Col-0	-0.128943	0.897402	IHW	0.76614	ashr	-0.00425039	0.0561253
DAS30	AT2G07718	147.423	~genotype	Wald	EV v Col-0	-0.201886	0.840006	IHW	1	ashr	-0.0030471	0.0732682
DAS30	AT2G10940	48111.8	~genotype	Wald	EV v Col-0	-3.02218	0.00250957	IHW	0.147806	ashr	-0.111368	0.128703
DAS30	AT2G11520	1230.59	~genotype	Wald	EV v Col-0	0.457975	0.64697	IHW	0.980511	ashr	0.014007	0.0606153
DAS30	AT2G13820	565.675	~genotype	Wald	EV v Col-0	-2.19853	0.0279115	IHW	0.484472	ashr	-0.0644924	0.0827809
DAS30	AT2G14080	1821.16	~genotype	Wald	EV v Col-0	1.66138	0.0966362	IHW	0.583661	ashr	0.0551737	0.0611073
DAS30	AT2G14890	2929.01	~genotype	Wald	EV v Col-0	-2.3919	0.0167612	IHW	0.332379	ashr	-0.0638508	0.095611
DAS30	AT2G15042	970.51	~genotype	Wald	EV v Col-0	0.31089	0.755885	IHW	0.990466	ashr	0.00600024	0.0706436
DAS30	AT2G15280	636.423	~genotype	Wald	EV v Col-0	0.518168	0.604341	IHW	1	ashr	0.0166775	0.0581291
DAS30	AT2G15390	710.21	~genotype	Wald	EV v Col-0	0.166844	0.867493	IHW	1	ashr	0.00251344	0.0732552
DAS30	AT2G15480	201.977	~genotype	Wald	EV v Col-0	1.12193	0.26189	IHW	0.979671	ashr	0.028695	0.0687577
DAS30	AT2G16390	505.777	~genotype	Wald	EV v Col-0	1.95342	0.0507696	IHW	0.557062	ashr	0.0646772	0.0654947
DAS30	AT2G16630	515.221	~genotype	Wald	EV v Col-0	-2.32113	0.02028	IHW	0.397151	ashr	-0.0747378	0.0800816
DAS30	AT2G16750	453.68	~genotype	Wald	EV v Col-0	-1.49289	0.135467	IHW	0.760214	ashr	-0.0383307	0.0722004
DAS30	AT2G17040	1655.03	~genotype	Wald	EV v Col-0	1.39259	0.163745	IHW	0.81982	ashr	0.0242563	0.0776133
DAS30	AT2G17290	1223.1	~genotype	Wald	EV v Col-0	0.838774	0.401596	IHW	0.871624	ashr	0.019972	0.0687934
DAS30	AT2G17370	356.055	~genotype	Wald	EV v Col-0	-0.590913	0.554579	IHW	1	ashr	-0.0175616	0.061991
DAS30	AT2G17500	260.877	~genotype	Wald	EV v Col-0	0.257651	0.796676	IHW	1	ashr	0.00376942	0.073611
DAS30	AT2G17705	380.682	~genotype	Wald	EV v Col-0	0.857603	0.391112	IHW	1	ashr	0.0209725	0.0683124
DAS30	AT2G17760	1610.89	~genotype	Wald	EV v Col-0	-2.16372	0.0304861	IHW	0.396848	ashr	-0.0730532	0.0679445
DAS30	AT2G17780	685.679	~genotype	Wald	EV v Col-0	0.903128	0.366458	IHW	0.987844	ashr	0.0279365	0.0611562
DAS30	AT2G17787	364.65	~genotype	Wald	EV v Col-0	1.26138	0.207171	IHW	0.794676	ashr	0.035467	0.0668921
DAS30	AT2G17800	1272.7	~genotype	Wald	EV v Col-0	-0.161956	0.871341	IHW	1	ashr	-0.00553878	0.0470531
DAS30	AT2G17972	1500.06	~genotype	Wald	EV v Col-0	0.240496	0.809945	IHW	1	ashr	0.00627032	0.0652778
DAS30	AT2G18400	650.081	~genotype	Wald	EV v Col-0	-0.780227	0.435257	IHW	1	ashr	-0.0245269	0.0599858
DAS30	AT2G18670	554.592	~genotype	Wald	EV v Col-0	0.0162512	0.987034	IHW	1	ashr	0.000392436	0.0667949
DAS30	AT2G18700	4887.58	~genotype	Wald	EV v Col-0	1.09408	0.273921	IHW	0.631905	ashr	0.0192815	0.0749612
DAS30	AT2G18950	1536.1	~genotype	Wald	EV v Col-0	-1.38807	0.165116	IHW	0.819881	ashr	-0.0436299	0.0628185
DAS30	AT2G18990	639.1	~genotype	Wald	EV v Col-0	-1.32824	0.184098	IHW	0.762762	ashr	-0.0405993	0.0638892
DAS30	AT2G19130	1050.33	~genotype	Wald	EV v Col-0	0.602863	0.5466	IHW	0.917972	ashr	0.0155421	0.0661879
DAS30	AT2G19710	696.381	~genotype	Wald	EV v Col-0	0.336071	0.736817	IHW	1	ashr	0.00940585	0.0635402
DAS30	AT2G19940	2432.41	~genotype	Wald	EV v Col-0	-1.85142	0.0641096	IHW	0.509108	ashr	-0.0627497	0.0611038
DAS30	AT2G20142	437.07	~genotype	Wald	EV v Col-0	-0.0195083	0.984436	IHW	1	ashr	-0.000307386	0.0727566
DAS30	AT2G20240	465.884	~genotype	Wald	EV v Col-0	1.02682	0.304503	IHW	0.945296	ashr	0.0301865	0.0638228
DAS30	AT2G20250	299.094	~genotype	Wald	EV v Col-0	-0.603702	0.546042	IHW	1	ashr	-0.0167306	0.0643052
DAS30	AT2G20310	335.76	~genotype	Wald	EV v Col-0	-1.31014	0.190148	IHW	0.900029	ashr	-0.0422551	0.0606755
DAS30	AT2G20360	6394.43	~genotype	Wald	EV v Col-0	-1.3796	0.167709	IHW	0.675346	ashr	-0.0466899	0.0568282
DAS30	AT2G20560	157.472	~genotype	Wald	EV v Col-0	-1.65289	0.0983538	IHW	0.929329	ashr	-0.0365721	0.0781436
DAS30	AT2G20890	18457.2	~genotype	Wald	EV v Col-0	-3.11254	0.00185482	IHW	0.0919909	ashr	-0.12339	0.0794458
DAS30	AT2G20900	1273.53	~genotype	Wald	EV v Col-0	-0.384719	0.700446	IHW	0.985978	ashr	-0.0128645	0.055024
DAS30	AT2G20960	2572.37	~genotype	Wald	EV v Col-0	0.0484192	0.961382	IHW	1	ashr	0.00148516	0.0601744
DAS30	AT2G20990	10206.3	~genotype	Wald	EV v Col-0	0.318231	0.75031	IHW	0.854157	ashr	0.0109194	0.0501527
DAS30	AT2G21170	17537.4	~genotype	Wald	EV v Col-0	-2.77886	0.005455	IHW	0.117855	ashr	-0.103522	0.0766793
DAS30	AT2G21280	3492.48	~genotype	Wald	EV v Col-0	-2.02126	0.0432528	IHW	0.454766	ashr	-0.0701273	0.0600548
DAS30	AT2G21330	62133.8	~genotype	Wald	EV v Col-0	-2.45901	0.0139319	IHW	0.231341	ashr	-0.0757621	0.0921604
DAS30	AT2G21385	2970.64	~genotype	Wald	EV v Col-0	-0.777746	0.436719	IHW	0.902031	ashr	-0.0237857	0.0612873
DAS30	AT2G21500	609.973	~genotype	Wald	EV v Col-0	0.874009	0.382114	IHW	0.996584	ashr	0.0230842	0.0665306
DAS30	AT2G21530	4594.13	~genotype	Wald	EV v Col-0	-0.84675	0.397134	IHW	0.85025	ashr	-0.0273341	0.0586473
DAS30	AT2G21540	463.286	~genotype	Wald	EV v Col-0	-0.726865	0.467309	IHW	1	ashr	-0.0175248	0.0680678
DAS30	AT2G21620	3316.59	~genotype	Wald	EV v Col-0	0.275819	0.782687	IHW	1	ashr	0.00885519	0.0580036
DAS30	AT2G22230	2102.38	~genotype	Wald	EV v Col-0	-3.43604	0.000590279	IHW	0.0680581	ashr	-0.161315	0.168601
DAS30	AT2G22300	3122.58	~genotype	Wald	EV v Col-0	1.53619	0.124492	IHW	0.631839	ashr	0.0432616	0.0695265
DAS30	AT2G22670	7245.73	~genotype	Wald	EV v Col-0	0.26031	0.794625	IHW	0.741589	ashr	0.00849581	0.0569354
DAS30	AT2G23380	828.597	~genotype	Wald	EV v Col-0	1.09754	0.272407	IHW	0.764328	ashr	0.0321552	0.0643106
DAS30	AT2G23810	3256.12	~genotype	Wald	EV v Col-0	-0.719588	0.471779	IHW	0.905561	ashr	-0.0153151	0.0703292
DAS30	AT2G23820	1062.85	~genotype	Wald	EV v Col-0	-0.105092	0.916303	IHW	1	ashr	-0.00345511	0.0563224
DAS30	AT2G24020	4362.29	~genotype	Wald	EV v Col-0	-1.80497	0.0710797	IHW	0.642297	ashr	-0.0579656	0.0658258
DAS30	AT2G24090	10741.6	~genotype	Wald	EV v Col-0	-1.47887	0.139176	IHW	0.632352	ashr	-0.0460685	0.0640817
DAS30	AT2G24150	2581.66	~genotype	Wald	EV v Col-0	-2.89243	0.00382274	IHW	0.186649	ashr	-0.108476	0.0637978
DAS30	AT2G24240	454.867	~genotype	Wald	EV v Col-0	1.57387	0.115517	IHW	0.704378	ashr	0.0336981	0.0774704
DAS30	AT2G24350	172.83	~genotype	Wald	EV v Col-0	1.5326	0.125374	IHW	1	ashr	0.0443161	0.0683688
DAS30	AT2G24395	638.991	~genotype	Wald	EV v Col-0	-0.511468	0.609023	IHW	1	ashr	-0.0113653	0.0689265
DAS30	AT2G24550	1901.42	~genotype	Wald	EV v Col-0	1.24875	0.211755	IHW	0.728246	ashr	0.0212536	0.0764833
DAS30	AT2G24610	48.663	~genotype	Wald	EV v Col-0	-0.936403	0.349066	IHW	1	ashr	-0.0146754	0.0750905
DAS30	AT2G25200	491.739	~genotype	Wald	EV v Col-0	1.13877	0.254801	IHW	0.842323	ashr	0.0235924	0.0732109
DAS30	AT2G25830	2540.47	~genotype	Wald	EV v Col-0	-1.69645	0.089801	IHW	0.565267	ashr	-0.0591005	0.053612
DAS30	AT2G25840	1959.43	~genotype	Wald	EV v Col-0	-1.57416	0.11545	IHW	0.622119	ashr	-0.0474974	0.0668058
DAS30	AT2G25870	2975.23	~genotype	Wald	EV v Col-0	-0.949059	0.342591	IHW	0.851127	ashr	-0.0294469	0.0611719
DAS30	AT2G26230	1756.57	~genotype	Wald	EV v Col-0	-0.438601	0.66095	IHW	0.988256	ashr	-0.0144217	0.0565619
DAS30	AT2G26260	682.333	~genotype	Wald	EV v Col-0	-1.64132	0.10073	IHW	0.672269	ashr	-0.0571586	0.0527856
DAS30	AT2G26550	1381.16	~genotype	Wald	EV v Col-0	0.532847	0.59414	IHW	0.964207	ashr	0.0157838	0.0619991
DAS30	AT2G26560	2264.51	~genotype	Wald	EV v Col-0	0.635995	0.52478	IHW	0.929329	ashr	0.0120788	0.071678
DAS30	AT2G27090	1058.62	~genotype	Wald	EV v Col-0	0.179342	0.857669	IHW	1	ashr	0.00583305	0.0571242
DAS30	AT2G27130	406.51	~genotype	Wald	EV v Col-0	-1.99643	0.0458874	IHW	0.545119	ashr	-0.0668552	0.0650271
DAS30	AT2G27500	562.724	~genotype	Wald	EV v Col-0	1.0609	0.288735	IHW	0.928868	ashr	0.0293799	0.0660844
DAS30	AT2G27720	8379.7	~genotype	Wald	EV v Col-0	-0.30466	0.760625	IHW	1	ashr	-0.00892261	0.0620773
DAS30	AT2G28110	206.765	~genotype	Wald	EV v Col-0	-0.949142	0.342548	IHW	1	ashr	-0.0150633	0.0750518
DAS30	AT2G28120	278.772	~genotype	Wald	EV v Col-0	-1.27467	0.202426	IHW	0.913951	ashr	-0.0333461	0.0693267
DAS30	AT2G28150	923.756	~genotype	Wald	EV v Col-0	0.366309	0.714135	IHW	1	ashr	0.0107532	0.0620659
DAS30	AT2G28400	265.255	~genotype	Wald	EV v Col-0	-1.51223	0.130476	IHW	1	ashr	-0.0272616	0.0786522
DAS30	AT2G28470	4011.12	~genotype	Wald	EV v Col-0	-0.651312	0.514845	IHW	0.905141	ashr	-0.0216396	0.0560364
DAS30	AT2G28500	75.6494	~genotype	Wald	EV v Col-0	0.0112029	0.991062	IHW	1	ashr	0.000178001	0.0726721
DAS30	AT2G28605	1185.87	~genotype	Wald	EV v Col-0	-2.36511	0.0180246	IHW	0.325465	ashr	-0.0827641	0.068346
DAS30	AT2G29050	506.445	~genotype	Wald	EV v Col-0	0.00334198	0.997333	IHW	1	ashr	0.000110946	0.0555069
DAS30	AT2G29350	2952.88	~genotype	Wald	EV v Col-0	-1.30139	0.193126	IHW	0.709503	ashr	-0.0127058	0.0787602
DAS30	AT2G29980	7202.91	~genotype	Wald	EV v Col-0	-0.202473	0.839547	IHW	0.875802	ashr	-0.00534188	0.0649633
DAS30	AT2G30020	454.084	~genotype	Wald	EV v Col-0	-0.239065	0.811055	IHW	1	ashr	-0.00628184	0.0650918
DAS30	AT2G30150	1044.5	~genotype	Wald	EV v Col-0	-1.87535	0.0607442	IHW	0.514033	ashr	-0.0582058	0.0696003
DAS30	AT2G30250	1509.38	~genotype	Wald	EV v Col-0	0.389889	0.696618	IHW	1	ashr	0.00927672	0.0674184
DAS30	AT2G30440	5717.93	~genotype	Wald	EV v Col-0	0.667171	0.504663	IHW	0.900796	ashr	0.0200091	0.0618123
DAS30	AT2G30840	47.9665	~genotype	Wald	EV v Col-0	0.502475	0.615334	IHW	1	ashr	0.00721186	0.074211
DAS30	AT2G31170	1725.17	~genotype	Wald	EV v Col-0	-1.14928	0.250443	IHW	0.776139	ashr	-0.0346105	0.0634549
DAS30	AT2G31800	3015.35	~genotype	Wald	EV v Col-0	1.1104	0.266826	IHW	0.76013	ashr	0.0293456	0.067788
DAS30	AT2G31880	9499.91	~genotype	Wald	EV v Col-0	0.600388	0.548248	IHW	0.662787	ashr	0.0122507	0.0705511
DAS30	AT2G31945	18.1464	~genotype	Wald	EV v Col-0	1.11304	0.265689	IHW	1	ashr	0.00820255	0.0784248
DAS30	AT2G31990	135.08	~genotype	Wald	EV v Col-0	-1.42521	0.154097	IHW	1	ashr	-0.030756	0.0753602
DAS30	AT2G32000	1093.45	~genotype	Wald	EV v Col-0	0.973396	0.330356	IHW	0.825876	ashr	0.033294	0.0532202
DAS30	AT2G32140	150.871	~genotype	Wald	EV v Col-0	0.16423	0.86955	IHW	1	ashr	0.00192825	0.075167
DAS30	AT2G32200	32.7674	~genotype	Wald	EV v Col-0	0.789379	0.42989	IHW	1	ashr	0.0128222	0.0740645
DAS30	AT2G32450	911.115	~genotype	Wald	EV v Col-0	1.57218	0.115908	IHW	0.618337	ashr	0.0494301	0.0644185
DAS30	AT2G32640	1545.74	~genotype	Wald	EV v Col-0	-1.2329	0.217614	IHW	0.745876	ashr	-0.0353871	0.065928
DAS30	AT2G32660	35.3404	~genotype	Wald	EV v Col-0	0.797052	0.425421	IHW	1	ashr	0.00609134	0.0776983
DAS30	AT2G32690	9483.33	~genotype	Wald	EV v Col-0	0.618932	0.535961	IHW	0.659217	ashr	0.0180229	0.0627837
DAS30	AT2G32800	1288.67	~genotype	Wald	EV v Col-0	0.403675	0.686452	IHW	0.996584	ashr	0.00907018	0.0684909
DAS30	AT2G32830	41.6916	~genotype	Wald	EV v Col-0	-3.4915	0.000480323	IHW	0.162936	ashr	-0.0685889	0.145691
DAS30	AT2G32940	150.145	~genotype	Wald	EV v Col-0	-0.211245	0.832696	IHW	1	ashr	-0.00537622	0.0657998
DAS30	AT2G33080	87.9141	~genotype	Wald	EV v Col-0	-0.824362	0.409734	IHW	1	ashr	-0.00971429	0.0764105
DAS30	AT2G33150	9995.09	~genotype	Wald	EV v Col-0	-0.555707	0.578411	IHW	0.776139	ashr	-0.0155751	0.063865
DAS30	AT2G33255	1001.8	~genotype	Wald	EV v Col-0	-0.510479	0.609716	IHW	0.966258	ashr	-0.0174579	0.0518617
DAS30	AT2G33330	1362.99	~genotype	Wald	EV v Col-0	-2.79166	0.00524378	IHW	0.210098	ashr	-0.103601	0.0849848
DAS30	AT2G33450	10091.8	~genotype	Wald	EV v Col-0	-1.33208	0.182834	IHW	0.55708	ashr	-0.0413124	0.0631661
DAS30	AT2G33580	508.617	~genotype	Wald	EV v Col-0	-0.95955	0.337282	IHW	0.902855	ashr	-0.023089	0.0691896
DAS30	AT2G33730	3638.81	~genotype	Wald	EV v Col-0	2.07424	0.0380566	IHW	0.451736	ashr	0.0728021	0.0500555
DAS30	AT2G33800	17544.7	~genotype	Wald	EV v Col-0	-2.03112	0.0422425	IHW	0.453773	ashr	-0.0652061	0.0702495
DAS30	AT2G34500	59.8827	~genotype	Wald	EV v Col-0	-1.47826	0.139338	IHW	1	ashr	-0.0203382	0.0794776
DAS30	AT2G34520	1033.28	~genotype	Wald	EV v Col-0	1.51008	0.131022	IHW	0.628187	ashr	0.0514215	0.056923
DAS30	AT2G34560	2171.54	~genotype	Wald	EV v Col-0	-1.15288	0.248958	IHW	0.760214	ashr	-0.038974	0.05576
DAS30	AT2G34620	2990.44	~genotype	Wald	EV v Col-0	-1.30144	0.193107	IHW	0.709503	ashr	-0.0417055	0.0610485
DAS30	AT2G34660	2822.12	~genotype	Wald	EV v Col-0	-0.222473	0.823946	IHW	1	ashr	-0.00448039	0.069934
DAS30	AT2G34680	4356.87	~genotype	Wald	EV v Col-0	-0.335188	0.737484	IHW	1	ashr	-0.00922264	0.0640196
DAS30	AT2G35450	1272.35	~genotype	Wald	EV v Col-0	-1.68353	0.0922726	IHW	0.555531	ashr	-0.0581482	0.0560634
DAS30	AT2G35500	2155.9	~genotype	Wald	EV v Col-0	-1.27636	0.201827	IHW	0.866902	ashr	-0.0409098	0.0608865
DAS30	AT2G35510	2347.53	~genotype	Wald	EV v Col-0	1.10461	0.26933	IHW	0.927378	ashr	0.0380869	0.0515734
DAS30	AT2G35550	33.6369	~genotype	Wald	EV v Col-0	0.708303	0.478757	IHW	1	ashr	0.0129218	0.0724605
DAS30	AT2G35930	226.895	~genotype	Wald	EV v Col-0	2.07887	0.0376293	IHW	0.721712	ashr	0.0429275	0.0878309
DAS30	AT2G35940	5524.06	~genotype	Wald	EV v Col-0	-0.459334	0.645994	IHW	0.819881	ashr	-0.0145356	0.059005
DAS30	AT2G36000	2631.86	~genotype	Wald	EV v Col-0	-2.63589	0.00839175	IHW	0.244062	ashr	-0.0945736	0.0796049
DAS30	AT2G36050	444.172	~genotype	Wald	EV v Col-0	-1.04303	0.296933	IHW	0.890165	ashr	-0.0237006	0.0708825
DAS30	AT2G36220	636.695	~genotype	Wald	EV v Col-0	0.585482	0.558224	IHW	1	ashr	0.016196	0.0643143
DAS30	AT2G36530	26522.1	~genotype	Wald	EV v Col-0	-1.24883	0.211726	IHW	0.585222	ashr	-0.0309409	0.0705711
DAS30	AT2G36580	2478.86	~genotype	Wald	EV v Col-0	-1.24031	0.214861	IHW	0.731302	ashr	-0.0345788	0.0670307
DAS30	AT2G36620	6990.18	~genotype	Wald	EV v Col-0	-0.197066	0.843776	IHW	0.751206	ashr	-0.00503594	0.0656974
DAS30	AT2G36770	52.6658	~genotype	Wald	EV v Col-0	1.69659	0.089774	IHW	0.926909	ashr	0.02961	0.0812426
DAS30	AT2G36780	76.0871	~genotype	Wald	EV v Col-0	2.53555	0.011227	IHW	0.514033	ashr	0.065911	0.103027
DAS30	AT2G36885	1164.2	~genotype	Wald	EV v Col-0	-3.59767	0.000321081	IHW	0.0483215	ashr	-0.186143	0.188961
DAS30	AT2G36990	4340.27	~genotype	Wald	EV v Col-0	0.10467	0.916638	IHW	1	ashr	0.00357917	0.051382
DAS30	AT2G37050	2134.56	~genotype	Wald	EV v Col-0	2.0506	0.0403059	IHW	0.549067	ashr	0.0722803	0.0554974
DAS30	AT2G37220	37395	~genotype	Wald	EV v Col-0	-2.81509	0.00487641	IHW	0.1443	ashr	-0.1024	0.0996299
DAS30	AT2G37410	3976.59	~genotype	Wald	EV v Col-0	-0.0697788	0.94437	IHW	1	ashr	-0.00221178	0.0586207
DAS30	AT2G37450	1389.08	~genotype	Wald	EV v Col-0	0.313117	0.754192	IHW	1	ashr	0.0102514	0.0567533
DAS30	AT2G37470	1993.37	~genotype	Wald	EV v Col-0	0.885131	0.376086	IHW	0.837689	ashr	0.024864	0.0647927
DAS30	AT2G37585	553.195	~genotype	Wald	EV v Col-0	-0.0300031	0.976065	IHW	1	ashr	-0.000873034	0.0621443
DAS30	AT2G37660	17899.3	~genotype	Wald	EV v Col-0	-2.06567	0.0388592	IHW	0.440477	ashr	-0.0695104	0.0658881
DAS30	AT2G37790	681.906	~genotype	Wald	EV v Col-0	-2.7749	0.00552181	IHW	0.268762	ashr	-0.102549	0.084514
DAS30	AT2G38025	1519.83	~genotype	Wald	EV v Col-0	0.612702	0.540073	IHW	0.955556	ashr	0.01654	0.065057
DAS30	AT2G38140	10037.3	~genotype	Wald	EV v Col-0	-2.37488	0.0175546	IHW	0.328372	ashr	-0.0825261	0.0704869
DAS30	AT2G38330	1908.33	~genotype	Wald	EV v Col-0	-1.61757	0.105755	IHW	0.600933	ashr	-0.0559499	0.0550226
DAS30	AT2G38340	17.2666	~genotype	Wald	EV v Col-0	0.383027	0.7017	IHW	1	ashr	0.00494078	0.0747844
DAS30	AT2G38470	1997.5	~genotype	Wald	EV v Col-0	0.95178	0.341209	IHW	0.849968	ashr	0.0228052	0.0692374
DAS30	AT2G38540	28289.9	~genotype	Wald	EV v Col-0	-1.66479	0.0959546	IHW	0.580975	ashr	-0.0451275	0.0728534
DAS30	AT2G38570	238.629	~genotype	Wald	EV v Col-0	1.71807	0.085784	IHW	0.725934	ashr	0.0531356	0.0672273
DAS30	AT2G38700	1765.35	~genotype	Wald	EV v Col-0	0.675638	0.499271	IHW	0.93083	ashr	0.0227754	0.0545888
DAS30	AT2G38720	142.203	~genotype	Wald	EV v Col-0	2.06887	0.0385583	IHW	0.784719	ashr	0.0614126	0.0774555
DAS30	AT2G38800	3283.84	~genotype	Wald	EV v Col-0	2.23583	0.0253631	IHW	0.381041	ashr	0.0722913	0.0759007
DAS30	AT2G39050	531.781	~genotype	Wald	EV v Col-0	-1.54652	0.121978	IHW	0.674536	ashr	-0.0419272	0.0711115
DAS30	AT2G39090	566.243	~genotype	Wald	EV v Col-0	0.83339	0.404625	IHW	0.941434	ashr	0.0280598	0.0551103
DAS30	AT2G39140	1904.13	~genotype	Wald	EV v Col-0	-1.47654	0.1398	IHW	0.64308	ashr	-0.0401087	0.0701694
DAS30	AT2G39190	4271.36	~genotype	Wald	EV v Col-0	-0.984889	0.324679	IHW	0.823459	ashr	-0.0339433	0.0489753
DAS30	AT2G39260	2583.02	~genotype	Wald	EV v Col-0	1.82488	0.068019	IHW	0.533048	ashr	0.0639028	0.0519568
DAS30	AT2G39400	799.144	~genotype	Wald	EV v Col-0	0.78662	0.431504	IHW	0.881747	ashr	0.0137526	0.0732907
DAS30	AT2G39480	1479.74	~genotype	Wald	EV v Col-0	0.306107	0.759523	IHW	1	ashr	0.0093389	0.0605386
DAS30	AT2G39710	614.806	~genotype	Wald	EV v Col-0	-2.62441	0.0086798	IHW	0.289303	ashr	-0.0844402	0.10003
DAS30	AT2G39980	319.885	~genotype	Wald	EV v Col-0	-0.0687132	0.945218	IHW	1	ashr	-0.00167021	0.0666756
DAS30	AT2G40000	4216.83	~genotype	Wald	EV v Col-0	1.85152	0.0640951	IHW	0.532816	ashr	0.027769	0.0834298
DAS30	AT2G40010	573.81	~genotype	Wald	EV v Col-0	-0.890249	0.373332	IHW	0.968534	ashr	-0.0230399	0.0671297
DAS30	AT2G40150	320.281	~genotype	Wald	EV v Col-0	-2.23925	0.0251398	IHW	0.514146	ashr	-0.0749258	0.0716816
DAS30	AT2G40270	2777.77	~genotype	Wald	EV v Col-0	-0.400244	0.688977	IHW	1	ashr	-0.00936547	0.0677543
DAS30	AT2G40480	521.838	~genotype	Wald	EV v Col-0	0.440467	0.659599	IHW	1	ashr	0.0113699	0.0657893
DAS30	AT2G40490	13487.6	~genotype	Wald	EV v Col-0	-1.40516	0.159973	IHW	0.54177	ashr	-0.0437877	0.0634449
DAS30	AT2G40540	2921.76	~genotype	Wald	EV v Col-0	-1.65802	0.0973132	IHW	0.565635	ashr	-0.0574024	0.0552296
DAS30	AT2G40950	1082.71	~genotype	Wald	EV v Col-0	-0.22911	0.818783	IHW	1	ashr	-0.00780317	0.0524021
DAS30	AT2G41100	9192.29	~genotype	Wald	EV v Col-0	0.951658	0.341271	IHW	0.664226	ashr	0.0188597	0.0725773
DAS30	AT2G41170	361.893	~genotype	Wald	EV v Col-0	-0.590183	0.555068	IHW	1	ashr	-0.0127933	0.0695681
DAS30	AT2G41210	394.013	~genotype	Wald	EV v Col-0	0.496853	0.619293	IHW	1	ashr	0.0136107	0.064398
DAS30	AT2G41380	175.573	~genotype	Wald	EV v Col-0	-2.14151	0.0322328	IHW	0.686589	ashr	-0.0420699	0.0894227
DAS30	AT2G41410	5241.72	~genotype	Wald	EV v Col-0	0.642532	0.520528	IHW	0.655231	ashr	0.01554	0.0677125
DAS30	AT2G41640	316.805	~genotype	Wald	EV v Col-0	0.707427	0.479301	IHW	0.990732	ashr	0.0133601	0.0720207
DAS30	AT2G41835	304.846	~genotype	Wald	EV v Col-0	-0.411473	0.680726	IHW	1	ashr	-0.0110791	0.0647056
DAS30	AT2G42170	132.233	~genotype	Wald	EV v Col-0	-0.0272011	0.978299	IHW	1	ashr	-0.000528696	0.070307
DAS30	AT2G42210	2729.34	~genotype	Wald	EV v Col-0	-1.6135	0.106637	IHW	0.604863	ashr	-0.0558468	0.0548043
DAS30	AT2G42220	16164.4	~genotype	Wald	EV v Col-0	-0.690414	0.489934	IHW	0.91099	ashr	-0.0201988	0.0627952
DAS30	AT2G42250	234.639	~genotype	Wald	EV v Col-0	0.00381133	0.996959	IHW	1	ashr	0.000106231	0.0634569
DAS30	AT2G42350	45.8083	~genotype	Wald	EV v Col-0	-0.0318713	0.974575	IHW	1	ashr	-0.000596702	0.070801
DAS30	AT2G42380	680.913	~genotype	Wald	EV v Col-0	-2.11073	0.0347952	IHW	0.504012	ashr	-0.0622671	0.0792105
DAS30	AT2G42570	524.857	~genotype	Wald	EV v Col-0	0.984122	0.325055	IHW	0.962386	ashr	0.0234608	0.0695321
DAS30	AT2G42760	369.191	~genotype	Wald	EV v Col-0	-1.12574	0.260277	IHW	0.88163	ashr	-0.028012	0.0694797
DAS30	AT2G42870	277.597	~genotype	Wald	EV v Col-0	0.290052	0.771776	IHW	1	ashr	0.0053551	0.0711886
DAS30	AT2G43030	20969.1	~genotype	Wald	EV v Col-0	0.135879	0.891917	IHW	1	ashr	0.00391456	0.0624974
DAS30	AT2G43060	540.712	~genotype	Wald	EV v Col-0	0.212609	0.831632	IHW	1	ashr	0.00646109	0.0606254
DAS30	AT2G43120	263.471	~genotype	Wald	EV v Col-0	0.121098	0.903614	IHW	1	ashr	0.0021442	0.0715225
DAS30	AT2G43560	5494.66	~genotype	Wald	EV v Col-0	-0.706424	0.479924	IHW	0.640059	ashr	-0.0216098	0.0610885
DAS30	AT2G43750	9250.46	~genotype	Wald	EV v Col-0	-1.49159	0.135806	IHW	0.640059	ashr	-0.0472308	0.063203
DAS30	AT2G43900	1222.24	~genotype	Wald	EV v Col-0	1.03446	0.300923	IHW	0.800864	ashr	0.0309249	0.063189
DAS30	AT2G44040	1794.39	~genotype	Wald	EV v Col-0	-1.89316	0.0583366	IHW	0.517041	ashr	-0.0547095	0.0743759
DAS30	AT2G44080	326.319	~genotype	Wald	EV v Col-0	-0.448049	0.654118	IHW	1	ashr	-0.0104814	0.0678544
DAS30	AT2G44280	313.72	~genotype	Wald	EV v Col-0	1.34742	0.177845	IHW	0.760214	ashr	0.0383733	0.067122
DAS30	AT2G44480	30.6613	~genotype	Wald	EV v Col-0	1.57831	0.114495	IHW	0.990466	ashr	0.0178441	0.0802826
DAS30	AT2G44500	627.12	~genotype	Wald	EV v Col-0	-0.758617	0.448082	IHW	0.973284	ashr	-0.0193783	0.0669031
DAS30	AT2G44520	1348.3	~genotype	Wald	EV v Col-0	-1.14863	0.25071	IHW	0.910525	ashr	-0.0323923	0.0660034
DAS30	AT2G44578	13.8033	~genotype	Wald	EV v Col-0	-0.262849	0.792667	IHW	1	ashr	-0.00263956	0.0760837
DAS30	AT2G44640	2033	~genotype	Wald	EV v Col-0	-1.90161	0.0572219	IHW	0.609703	ashr	-0.0617802	0.0664242
DAS30	AT2G44650	4519.08	~genotype	Wald	EV v Col-0	-1.62292	0.104606	IHW	0.584158	ashr	-0.0537189	0.0610355
DAS30	AT2G44740	504.968	~genotype	Wald	EV v Col-0	-0.500861	0.616469	IHW	1	ashr	-0.0100303	0.0705315
DAS30	AT2G44750	318.282	~genotype	Wald	EV v Col-0	0.587419	0.556923	IHW	1	ashr	0.0179751	0.060813
DAS30	AT2G44990	11.8121	~genotype	Wald	EV v Col-0	0.363501	0.716231	IHW	1	ashr	0.00240083	0.0775247
DAS30	AT2G45170	1472.23	~genotype	Wald	EV v Col-0	0.785385	0.432228	IHW	0.884075	ashr	0.0179351	0.0693763
DAS30	AT2G45270	1087.92	~genotype	Wald	EV v Col-0	-0.86784	0.385482	IHW	0.845777	ashr	-0.0292446	0.0551079
DAS30	AT2G45470	6087.21	~genotype	Wald	EV v Col-0	-3.24882	0.00115883	IHW	0.101503	ashr	-0.139679	0.142445
DAS30	AT2G45510	540.62	~genotype	Wald	EV v Col-0	-0.515782	0.606007	IHW	1	ashr	-0.0114072	0.0690183
DAS30	AT2G45770	2666.39	~genotype	Wald	EV v Col-0	-1.26568	0.205626	IHW	0.725777	ashr	-0.0401478	0.0614683
DAS30	AT2G45970	1150.72	~genotype	Wald	EV v Col-0	-1.1148	0.264935	IHW	0.774783	ashr	-0.0362285	0.0591491
DAS30	AT2G46430	1990.12	~genotype	Wald	EV v Col-0	-0.689494	0.490513	IHW	0.914221	ashr	-0.0159681	0.0687295
DAS30	AT2G46500	2139.37	~genotype	Wald	EV v Col-0	-0.207247	0.835817	IHW	1	ashr	-0.00641208	0.0598555
DAS30	AT2G46620	752.019	~genotype	Wald	EV v Col-0	1.31371	0.188944	IHW	0.773303	ashr	0.0331336	0.0707089
DAS30	AT2G46680	692.711	~genotype	Wald	EV v Col-0	-0.493467	0.621683	IHW	1	ashr	-0.0105129	0.0695769
DAS30	AT2G46780	446.3	~genotype	Wald	EV v Col-0	-0.951448	0.341377	IHW	0.974434	ashr	-0.0233764	0.0686821
DAS30	AT2G46810	637.546	~genotype	Wald	EV v Col-0	-0.672039	0.501559	IHW	0.996584	ashr	-0.0187919	0.0642182
DAS30	AT2G47190	125.849	~genotype	Wald	EV v Col-0	-0.53247	0.594401	IHW	1	ashr	-0.00661502	0.0753184
DAS30	AT2G47450	20735.2	~genotype	Wald	EV v Col-0	-0.571632	0.567572	IHW	0.787268	ashr	-0.0177512	0.0601218
DAS30	AT2G47630	555.288	~genotype	Wald	EV v Col-0	-1.96858	0.0490008	IHW	0.565635	ashr	-0.0663367	0.0637205
DAS30	AT2G47730	10082.7	~genotype	Wald	EV v Col-0	-2.41284	0.0158287	IHW	0.200697	ashr	-0.0813034	0.0784972
DAS30	AT2G47940	8733.41	~genotype	Wald	EV v Col-0	-0.546197	0.584931	IHW	0.795022	ashr	-0.0175604	0.0582394
DAS30	AT2G48070	2885.54	~genotype	Wald	EV v Col-0	-2.23406	0.025479	IHW	0.376405	ashr	-0.0758629	0.0692664
DAS30	AT3G01290	4446.83	~genotype	Wald	EV v Col-0	0.229872	0.818191	IHW	1	ashr	0.00315945	0.0741051
DAS30	AT3G01370	4459.73	~genotype	Wald	EV v Col-0	0.545766	0.585227	IHW	0.957502	ashr	0.0169367	0.060107
DAS30	AT3G01480	14843.1	~genotype	Wald	EV v Col-0	-2.00067	0.0454278	IHW	0.296267	ashr	-0.0653337	0.0678872
DAS30	AT3G01830	150.977	~genotype	Wald	EV v Col-0	-0.46997	0.638376	IHW	1	ashr	-0.005942	0.0750761
DAS30	AT3G02080	9386.4	~genotype	Wald	EV v Col-0	-0.479407	0.631649	IHW	0.975521	ashr	-0.0145851	0.0608696
DAS30	AT3G02110	1385.12	~genotype	Wald	EV v Col-0	0.110269	0.912196	IHW	1	ashr	0.00293988	0.0646522
DAS30	AT3G02170	3093.13	~genotype	Wald	EV v Col-0	1.3618	0.173261	IHW	0.682934	ashr	0.0394	0.0666217
DAS30	AT3G02540	3468.62	~genotype	Wald	EV v Col-0	0.175302	0.860842	IHW	1	ashr	0.00568749	0.0572875
DAS30	AT3G02660	1406.25	~genotype	Wald	EV v Col-0	-0.492591	0.622301	IHW	0.953055	ashr	-0.014685	0.0616912
DAS30	AT3G02800	70.4778	~genotype	Wald	EV v Col-0	0.410187	0.681669	IHW	1	ashr	0.00638893	0.07328
DAS30	AT3G02840	68.2785	~genotype	Wald	EV v Col-0	-0.0321787	0.97433	IHW	1	ashr	-0.000442007	0.0739958
DAS30	AT3G02870	3122.86	~genotype	Wald	EV v Col-0	-1.41573	0.156856	IHW	0.67603	ashr	-0.0475408	0.0579548
DAS30	AT3G02875	399.852	~genotype	Wald	EV v Col-0	-0.884287	0.376541	IHW	1	ashr	-0.0263118	0.0627646
DAS30	AT3G03000	265.017	~genotype	Wald	EV v Col-0	0.0399634	0.968122	IHW	1	ashr	0.00101076	0.0658481
DAS30	AT3G03470	2505.6	~genotype	Wald	EV v Col-0	-1.00478	0.315004	IHW	0.815296	ashr	-0.0216028	0.0716373
DAS30	AT3G03820	203.298	~genotype	Wald	EV v Col-0	-1.69254	0.0905436	IHW	0.9114	ashr	-0.0312916	0.0808799
DAS30	AT3G03980	619.632	~genotype	Wald	EV v Col-0	0.524201	0.600139	IHW	1	ashr	0.0173217	0.0562855
DAS30	AT3G04060	146.901	~genotype	Wald	EV v Col-0	-0.174926	0.861138	IHW	1	ashr	-0.00261973	0.0733162
DAS30	AT3G04220	117.516	~genotype	Wald	EV v Col-0	0.298729	0.765147	IHW	1	ashr	0.00513953	0.0720432
DAS30	AT3G04240	3645.08	~genotype	Wald	EV v Col-0	-0.20466	0.837837	IHW	1	ashr	-0.00646319	0.0588664
DAS30	AT3G04420	27.1161	~genotype	Wald	EV v Col-0	1.89844	0.0576387	IHW	0.624586	ashr	0.0279884	0.0839934
DAS30	AT3G04640	361.645	~genotype	Wald	EV v Col-0	0.546735	0.584561	IHW	1	ashr	0.01149	0.0699362
DAS30	AT3G04790	11442	~genotype	Wald	EV v Col-0	-2.83583	0.00457069	IHW	0.200784	ashr	-0.105316	0.0946258
DAS30	AT3G04810	1166.73	~genotype	Wald	EV v Col-0	2.03756	0.0415937	IHW	0.459934	ashr	0.071855	0.0532676
DAS30	AT3G04930	1796.85	~genotype	Wald	EV v Col-0	0.977422	0.32836	IHW	0.804338	ashr	0.0335123	0.0527015
DAS30	AT3G05000	1037.85	~genotype	Wald	EV v Col-0	-0.405267	0.685281	IHW	0.976712	ashr	-0.01271	0.0593947
DAS30	AT3G05200	950.593	~genotype	Wald	EV v Col-0	0.937102	0.348706	IHW	0.837689	ashr	0.0189838	0.0721704
DAS30	AT3G05320	227.266	~genotype	Wald	EV v Col-0	-1.17456	0.24017	IHW	1	ashr	-0.0269812	0.0716472
DAS30	AT3G05360	144.892	~genotype	Wald	EV v Col-0	0.0135823	0.989163	IHW	1	ashr	0.000275404	0.0697143
DAS30	AT3G05380	1115.27	~genotype	Wald	EV v Col-0	4.47628	7.59549e-06	IHW	0.00522862	ashr	0.24933	0.106576
DAS30	AT3G05625	797.946	~genotype	Wald	EV v Col-0	-1.93749	0.0526854	IHW	0.481422	ashr	-0.0527952	0.0782751
DAS30	AT3G05910	3835.58	~genotype	Wald	EV v Col-0	-1.69461	0.0901494	IHW	0.584228	ashr	-0.0591148	0.0508768
DAS30	AT3G05937	159.611	~genotype	Wald	EV v Col-0	-0.439888	0.660019	IHW	1	ashr	-0.0103137	0.0677951
DAS30	AT3G06080	3117.75	~genotype	Wald	EV v Col-0	0.435666	0.663079	IHW	0.988619	ashr	0.0130507	0.0614208
DAS30	AT3G06140	271.941	~genotype	Wald	EV v Col-0	-1.43068	0.152523	IHW	0.729688	ashr	-0.0397822	0.068818
DAS30	AT3G06170	1893.23	~genotype	Wald	EV v Col-0	-1.09004	0.275697	IHW	0.931266	ashr	-0.0363441	0.056979
DAS30	AT3G06370	174.152	~genotype	Wald	EV v Col-0	-0.769593	0.441541	IHW	1	ashr	-0.0153999	0.0714893
DAS30	AT3G06640	35.4418	~genotype	Wald	EV v Col-0	1.67236	0.0944535	IHW	0.710728	ashr	0.0272045	0.0811459
DAS30	AT3G06770	1084.11	~genotype	Wald	EV v Col-0	-3.05891	0.00222146	IHW	0.134439	ashr	-0.122669	0.101018
DAS30	AT3G06860	3298.06	~genotype	Wald	EV v Col-0	-0.720672	0.471111	IHW	0.903137	ashr	-0.0245577	0.0531175
DAS30	AT3G06880	1521.6	~genotype	Wald	EV v Col-0	0.392267	0.694861	IHW	0.980511	ashr	0.010158	0.0656315
DAS30	AT3G07195	353.08	~genotype	Wald	EV v Col-0	-0.452194	0.651129	IHW	1	ashr	-0.00782512	0.0722741
DAS30	AT3G07210	434.188	~genotype	Wald	EV v Col-0	-0.0407612	0.967486	IHW	1	ashr	-0.00127054	0.059453
DAS30	AT3G07540	995.03	~genotype	Wald	EV v Col-0	-0.0785351	0.937402	IHW	1	ashr	-0.00227196	0.0623435
DAS30	AT3G07568	698.219	~genotype	Wald	EV v Col-0	-1.3592	0.174083	IHW	0.749923	ashr	-0.0461301	0.0563386
DAS30	AT3G07600	37.3128	~genotype	Wald	EV v Col-0	-1.70743	0.087743	IHW	0.920275	ashr	-0.0217029	0.0814707
DAS30	AT3G07780	3009.35	~genotype	Wald	EV v Col-0	2.44023	0.0146781	IHW	0.324223	ashr	0.0856592	0.0713481
DAS30	AT3G08600	607.243	~genotype	Wald	EV v Col-0	-1.68488	0.0920121	IHW	0.657578	ashr	-0.0518525	0.0670729
DAS30	AT3G08680	2259.09	~genotype	Wald	EV v Col-0	-0.620356	0.535023	IHW	0.930039	ashr	-0.0179952	0.0629179
DAS30	AT3G08690	1107.56	~genotype	Wald	EV v Col-0	-1.08796	0.276612	IHW	0.769344	ashr	-0.0315983	0.0645913
DAS30	AT3G08740	8330.79	~genotype	Wald	EV v Col-0	-3.15477	0.00160625	IHW	0.0824767	ashr	-0.131713	0.11717
DAS30	AT3G08760	1317.75	~genotype	Wald	EV v Col-0	0.668877	0.503574	IHW	0.916845	ashr	0.0208554	0.0601245
DAS30	AT3G08860	308.601	~genotype	Wald	EV v Col-0	-2.97214	0.00295734	IHW	0.194701	ashr	-0.0267286	0.109899
DAS30	AT3G08920	2234.56	~genotype	Wald	EV v Col-0	-0.99555	0.319469	IHW	0.833574	ashr	-0.0304134	0.0620826
DAS30	AT3G08940	120882	~genotype	Wald	EV v Col-0	-0.594777	0.551993	IHW	0.920005	ashr	-0.0148262	0.0669301
DAS30	AT3G09020	336.546	~genotype	Wald	EV v Col-0	0.306036	0.759577	IHW	1	ashr	0.00458246	0.0734672
DAS30	AT3G09210	3245.67	~genotype	Wald	EV v Col-0	0.706477	0.479892	IHW	0.922848	ashr	0.0197073	0.0643884
DAS30	AT3G09440	10452.7	~genotype	Wald	EV v Col-0	0.184719	0.85345	IHW	1	ashr	0.00560523	0.0606682
DAS30	AT3G09800	545.193	~genotype	Wald	EV v Col-0	-1.43452	0.151425	IHW	0.760214	ashr	-0.0477419	0.0589822
DAS30	AT3G09830	1087.21	~genotype	Wald	EV v Col-0	-0.261436	0.793756	IHW	1	ashr	-0.00628439	0.0670319
DAS30	AT3G09860	3720.13	~genotype	Wald	EV v Col-0	0.392089	0.694992	IHW	1	ashr	0.00945185	0.0671667
DAS30	AT3G10080	799.479	~genotype	Wald	EV v Col-0	-3.89892	9.66244e-05	IHW	0.0218063	ashr	-0.216458	0.131081
DAS30	AT3G10320	139.785	~genotype	Wald	EV v Col-0	-1.39022	0.164462	IHW	1	ashr	-0.016091	0.0790699
DAS30	AT3G10480	1164.77	~genotype	Wald	EV v Col-0	0.0917261	0.926916	IHW	1	ashr	0.00304683	0.0554676
DAS30	AT3G10490	1151	~genotype	Wald	EV v Col-0	1.04494	0.296049	IHW	0.780615	ashr	0.0313625	0.0630719
DAS30	AT3G10500	627.777	~genotype	Wald	EV v Col-0	0.0741506	0.940891	IHW	1	ashr	0.0017844	0.0668735
DAS30	AT3G10640	810.475	~genotype	Wald	EV v Col-0	0.562918	0.573491	IHW	0.930039	ashr	0.017448	0.0601933
DAS30	AT3G10700	566.17	~genotype	Wald	EV v Col-0	-1.11237	0.265979	IHW	0.870545	ashr	-0.0370611	0.0571402
DAS30	AT3G10930	96.9382	~genotype	Wald	EV v Col-0	-0.526275	0.598697	IHW	1	ashr	-0.00987127	0.0714924
DAS30	AT3G11080	255.718	~genotype	Wald	EV v Col-0	-0.492677	0.622241	IHW	1	ashr	-0.0097385	0.0706952
DAS30	AT3G11150	13.5151	~genotype	Wald	EV v Col-0	0.929062	0.352857	IHW	1	ashr	0.0091973	0.0773812
DAS30	AT3G11410	2405.03	~genotype	Wald	EV v Col-0	-0.531827	0.594846	IHW	1	ashr	-0.0139998	0.0655082
DAS30	AT3G11630	29229.8	~genotype	Wald	EV v Col-0	-2.45048	0.0142667	IHW	0.193753	ashr	-0.0848707	0.0753029
DAS30	AT3G11640	31.1574	~genotype	Wald	EV v Col-0	0.20373	0.838565	IHW	1	ashr	0.0030257	0.0734183
DAS30	AT3G11760	493.497	~genotype	Wald	EV v Col-0	2.07533	0.0379561	IHW	0.533585	ashr	0.0718503	0.0616005
DAS30	AT3G11820	2061.93	~genotype	Wald	EV v Col-0	-1.40106	0.161197	IHW	0.670554	ashr	-0.040866	0.0666319
DAS30	AT3G11840	306.242	~genotype	Wald	EV v Col-0	-0.258016	0.796395	IHW	1	ashr	-0.00440894	0.0720625
DAS30	AT3G11850	589.24	~genotype	Wald	EV v Col-0	1.01329	0.310923	IHW	0.920005	ashr	0.0272669	0.0666929
DAS30	AT3G12110	851.372	~genotype	Wald	EV v Col-0	-1.693	0.0904559	IHW	0.557062	ashr	-0.0458612	0.0733485
DAS30	AT3G12345	6054.14	~genotype	Wald	EV v Col-0	-0.244718	0.806675	IHW	0.85446	ashr	-0.00669716	0.0640686
DAS30	AT3G12360	2664.15	~genotype	Wald	EV v Col-0	0.594262	0.552337	IHW	0.945855	ashr	0.0158863	0.0652672
DAS30	AT3G12580	203.929	~genotype	Wald	EV v Col-0	1.25892	0.208058	IHW	1	ashr	0.0234619	0.0756733
DAS30	AT3G12740	2769.87	~genotype	Wald	EV v Col-0	0.682716	0.494787	IHW	1	ashr	0.0190776	0.064268
DAS30	AT3G12915	533.8	~genotype	Wald	EV v Col-0	-0.589889	0.555265	IHW	1	ashr	-0.0171118	0.0628488
DAS30	AT3G12930	3165.28	~genotype	Wald	EV v Col-0	-0.848341	0.396248	IHW	1	ashr	-0.0270351	0.0594313
DAS30	AT3G13000	694.207	~genotype	Wald	EV v Col-0	0.572976	0.566661	IHW	1	ashr	0.0140786	0.0671794
DAS30	AT3G13062	3252.14	~genotype	Wald	EV v Col-0	0.706681	0.479765	IHW	0.890035	ashr	0.0144199	0.0709351
DAS30	AT3G13120	15294.3	~genotype	Wald	EV v Col-0	-2.79996	0.00511085	IHW	0.114924	ashr	-0.104658	0.0788428
DAS30	AT3G13310	958.488	~genotype	Wald	EV v Col-0	0.545007	0.585748	IHW	0.922866	ashr	0.0166337	0.0608456
DAS30	AT3G13360	1333.15	~genotype	Wald	EV v Col-0	0.939709	0.347367	IHW	0.819881	ashr	0.0281889	0.0626459
DAS30	AT3G13430	479.485	~genotype	Wald	EV v Col-0	1.01887	0.308265	IHW	0.897703	ashr	0.0278138	0.0662989
DAS30	AT3G13700	469.869	~genotype	Wald	EV v Col-0	0.705635	0.480415	IHW	1	ashr	0.0201049	0.0637293
DAS30	AT3G13720	1184.49	~genotype	Wald	EV v Col-0	-2.28128	0.0225319	IHW	0.353386	ashr	-0.0741807	0.0771011
DAS30	AT3G14050	1698.17	~genotype	Wald	EV v Col-0	-0.278898	0.780323	IHW	1	ashr	-0.00592537	0.0692041
DAS30	AT3G14070	146.734	~genotype	Wald	EV v Col-0	-0.0386496	0.96917	IHW	1	ashr	-0.00100509	0.0652272
DAS30	AT3G14090	631.755	~genotype	Wald	EV v Col-0	0.0582499	0.95355	IHW	1	ashr	0.00166412	0.062735
DAS30	AT3G14110	4549.46	~genotype	Wald	EV v Col-0	-0.215975	0.829007	IHW	1	ashr	-0.00671154	0.0596604
DAS30	AT3G14230	2758.93	~genotype	Wald	EV v Col-0	-0.154613	0.877126	IHW	1	ashr	-0.00518432	0.0545614
DAS30	AT3G14240	5706.64	~genotype	Wald	EV v Col-0	-1.42749	0.153439	IHW	0.53427	ashr	-0.0444348	0.0636853
DAS30	AT3G14280	227.964	~genotype	Wald	EV v Col-0	-0.0704897	0.943804	IHW	1	ashr	-0.00102045	0.0735617
DAS30	AT3G14290	2169.04	~genotype	Wald	EV v Col-0	-0.749753	0.453403	IHW	1	ashr	-0.0256673	0.0468839
DAS30	AT3G14440	212.194	~genotype	Wald	EV v Col-0	0.462467	0.643746	IHW	1	ashr	0.00738605	0.0731497
DAS30	AT3G14620	1721.97	~genotype	Wald	EV v Col-0	-0.597987	0.549849	IHW	0.919226	ashr	-0.0179327	0.0616617
DAS30	AT3G14700	45.2265	~genotype	Wald	EV v Col-0	-0.568035	0.570011	IHW	1	ashr	-0.00945499	0.0730086
DAS30	AT3G14760	178.484	~genotype	Wald	EV v Col-0	0.207033	0.835984	IHW	1	ashr	0.00338748	0.0724742
DAS30	AT3G14930	10685	~genotype	Wald	EV v Col-0	-1.27535	0.202184	IHW	0.700733	ashr	-0.0413972	0.0600276
DAS30	AT3G15190	12893.6	~genotype	Wald	EV v Col-0	-1.54984	0.121179	IHW	0.626946	ashr	-0.048676	0.0642591
DAS30	AT3G15353	38779.4	~genotype	Wald	EV v Col-0	0.63346	0.526433	IHW	0.655709	ashr	0.0172224	0.064919
DAS30	AT3G15500	101.691	~genotype	Wald	EV v Col-0	1.70335	0.088502	IHW	0.922866	ashr	0.0214429	0.0814157
DAS30	AT3G15518	92.7447	~genotype	Wald	EV v Col-0	0.51034	0.609813	IHW	1	ashr	0.0110851	0.0693064
DAS30	AT3G15520	3241.01	~genotype	Wald	EV v Col-0	-1.50135	0.133265	IHW	0.638622	ashr	-0.046984	0.0640152
DAS30	AT3G15620	183.907	~genotype	Wald	EV v Col-0	1.64851	0.0992478	IHW	0.755647	ashr	0.0405642	0.0757052
DAS30	AT3G15680	1149.42	~genotype	Wald	EV v Col-0	-1.99628	0.045903	IHW	0.464456	ashr	-0.0667929	0.0651284
DAS30	AT3G15820	1150.85	~genotype	Wald	EV v Col-0	0.509371	0.610492	IHW	0.966258	ashr	0.014723	0.0628081
DAS30	AT3G15880	3789.98	~genotype	Wald	EV v Col-0	-0.275988	0.782557	IHW	1	ashr	-0.00852999	0.0599515
DAS30	AT3G16000	9140.57	~genotype	Wald	EV v Col-0	1.25765	0.20852	IHW	0.509108	ashr	0.0344894	0.0677206
DAS30	AT3G16060	1956.06	~genotype	Wald	EV v Col-0	1.04502	0.296011	IHW	0.801859	ashr	0.0346546	0.0572978
DAS30	AT3G16240	21845	~genotype	Wald	EV v Col-0	-2.36685	0.0179403	IHW	0.341289	ashr	-0.0714738	0.0884742
DAS30	AT3G16370	12991.5	~genotype	Wald	EV v Col-0	-0.977897	0.328125	IHW	0.804338	ashr	-0.025789	0.067069
DAS30	AT3G16510	229.147	~genotype	Wald	EV v Col-0	-1.78603	0.0740942	IHW	0.884014	ashr	-0.052084	0.0717007
DAS30	AT3G16720	736.186	~genotype	Wald	EV v Col-0	-0.189029	0.85007	IHW	1	ashr	-0.00513218	0.0642344
DAS30	AT3G16860	114.617	~genotype	Wald	EV v Col-0	-1.21076	0.225988	IHW	1	ashr	-0.0236055	0.0746909
DAS30	AT3G16910	1745.71	~genotype	Wald	EV v Col-0	-0.813329	0.416029	IHW	1	ashr	-0.0213876	0.0663933
DAS30	AT3G16990	555.949	~genotype	Wald	EV v Col-0	-0.502374	0.615404	IHW	1	ashr	-0.0115837	0.068247
DAS30	AT3G17090	2172.44	~genotype	Wald	EV v Col-0	-1.20703	0.22742	IHW	0.744624	ashr	-0.0417207	0.0510639
DAS30	AT3G17700	1299.96	~genotype	Wald	EV v Col-0	0.334057	0.738337	IHW	0.997244	ashr	0.00912034	0.0642289
DAS30	AT3G17790	826.104	~genotype	Wald	EV v Col-0	-3.38278	0.000717556	IHW	0.0792706	ashr	-0.103481	0.158958
DAS30	AT3G17800	4445.44	~genotype	Wald	EV v Col-0	1.0335	0.301371	IHW	0.957911	ashr	0.0319335	0.0617089
DAS30	AT3G17810	2580.78	~genotype	Wald	EV v Col-0	-1.24324	0.213781	IHW	0.743822	ashr	-0.0349731	0.0667384
DAS30	AT3G18390	9949.96	~genotype	Wald	EV v Col-0	1.31209	0.189488	IHW	0.574885	ashr	0.0405235	0.0632479
DAS30	AT3G18560	227.659	~genotype	Wald	EV v Col-0	1.6813	0.0927048	IHW	0.960014	ashr	0.0353162	0.079436
DAS30	AT3G18890	10887.9	~genotype	Wald	EV v Col-0	-1.9207	0.0547694	IHW	0.390033	ashr	-0.053806	0.0766025
DAS30	AT3G18940	771.995	~genotype	Wald	EV v Col-0	0.542898	0.5872	IHW	0.938036	ashr	0.0179743	0.0561523
DAS30	AT3G18960	242.876	~genotype	Wald	EV v Col-0	1.03407	0.301102	IHW	1	ashr	0.030072	0.0642673
DAS30	AT3G19010	3900.77	~genotype	Wald	EV v Col-0	0.954589	0.339786	IHW	0.849463	ashr	0.0224892	0.0696092
DAS30	AT3G19030	980.362	~genotype	Wald	EV v Col-0	1.41659	0.156603	IHW	0.652841	ashr	0.0305137	0.0752891
DAS30	AT3G19180	1075.48	~genotype	Wald	EV v Col-0	1.23933	0.215224	IHW	0.731302	ashr	0.0408461	0.0586728
DAS30	AT3G19290	1253.62	~genotype	Wald	EV v Col-0	2.79478	0.00519356	IHW	0.207448	ashr	0.104484	0.0753034
DAS30	AT3G19570	759.42	~genotype	Wald	EV v Col-0	-0.156595	0.875564	IHW	1	ashr	-0.00514235	0.0564297
DAS30	AT3G19580	251.78	~genotype	Wald	EV v Col-0	-0.227895	0.819728	IHW	1	ashr	-0.0050262	0.0685402
DAS30	AT3G19660	134.477	~genotype	Wald	EV v Col-0	0.477445	0.633045	IHW	1	ashr	0.00835216	0.0722117
DAS30	AT3G19820	12207.6	~genotype	Wald	EV v Col-0	-0.729879	0.465464	IHW	0.637797	ashr	-0.0242522	0.0561924
DAS30	AT3G20250	1726.73	~genotype	Wald	EV v Col-0	0.890962	0.372949	IHW	0.857485	ashr	0.0212944	0.0689676
DAS30	AT3G20350	578.99	~genotype	Wald	EV v Col-0	1.16178	0.245325	IHW	0.832826	ashr	0.0341941	0.0644908
DAS30	AT3G20410	1267.18	~genotype	Wald	EV v Col-0	0.734546	0.462616	IHW	0.88392	ashr	0.0216181	0.0627012
DAS30	AT3G20680	1105.33	~genotype	Wald	EV v Col-0	-2.27482	0.0229166	IHW	0.3562	ashr	-0.0786334	0.0674881
DAS30	AT3G20790	1914.45	~genotype	Wald	EV v Col-0	-0.490781	0.623581	IHW	0.976118	ashr	-0.0154615	0.0592827
DAS30	AT3G21055	49544.7	~genotype	Wald	EV v Col-0	-1.69338	0.0903841	IHW	0.470081	ashr	-0.0514931	0.0679003
DAS30	AT3G21780	234.977	~genotype	Wald	EV v Col-0	0.776215	0.437622	IHW	1	ashr	0.013227	0.0735235
DAS30	AT3G21870	322.192	~genotype	Wald	EV v Col-0	1.95565	0.050506	IHW	0.53427	ashr	0.0579116	0.074467
DAS30	AT3G22110	4639.81	~genotype	Wald	EV v Col-0	-0.425267	0.670642	IHW	0.995074	ashr	-0.0123624	0.0624792
DAS30	AT3G22120	20681.1	~genotype	Wald	EV v Col-0	-0.956356	0.338893	IHW	0.583244	ashr	-0.0201485	0.0716734
DAS30	AT3G22330	2588.59	~genotype	Wald	EV v Col-0	-0.571638	0.567567	IHW	0.967835	ashr	-0.0150589	0.0655836
DAS30	AT3G22460	188.853	~genotype	Wald	EV v Col-0	0.9477	0.343282	IHW	1	ashr	0.0164109	0.0742146
DAS30	AT3G22930	91.6613	~genotype	Wald	EV v Col-0	-0.836754	0.402731	IHW	1	ashr	-0.0171249	0.0714724
DAS30	AT3G23030	1521.02	~genotype	Wald	EV v Col-0	2.14602	0.0318712	IHW	0.420624	ashr	0.0625262	0.0812242
DAS30	AT3G23210	387.108	~genotype	Wald	EV v Col-0	-0.676251	0.498881	IHW	1	ashr	-0.0207083	0.060971
DAS30	AT3G23450	1238.95	~genotype	Wald	EV v Col-0	0.599378	0.548921	IHW	0.939081	ashr	0.0126569	0.0700211
DAS30	AT3G23530	3456.59	~genotype	Wald	EV v Col-0	-2.09388	0.0362705	IHW	0.445037	ashr	-0.0704818	0.0665136
DAS30	AT3G23690	1702.88	~genotype	Wald	EV v Col-0	1.15027	0.250034	IHW	0.760283	ashr	0.0336218	0.0646973
DAS30	AT3G23730	1142.03	~genotype	Wald	EV v Col-0	-1.20633	0.227692	IHW	0.741589	ashr	-0.0376295	0.0620716
DAS30	AT3G23760	676.109	~genotype	Wald	EV v Col-0	-0.0663662	0.947086	IHW	1	ashr	-0.00210888	0.0584859
DAS30	AT3G23880	321.093	~genotype	Wald	EV v Col-0	2.76227	0.00574008	IHW	0.308156	ashr	0.0886797	0.111884
DAS30	AT3G24430	7117.23	~genotype	Wald	EV v Col-0	-1.091	0.275272	IHW	0.640059	ashr	-0.0329406	0.0630367
DAS30	AT3G24570	1144.36	~genotype	Wald	EV v Col-0	-0.349428	0.726768	IHW	0.979126	ashr	-0.0116893	0.0549452
DAS30	AT3G24929	522.8	~genotype	Wald	EV v Col-0	1.01968	0.307882	IHW	0.897703	ashr	0.0250216	0.0691052
DAS30	AT3G25070	1509.59	~genotype	Wald	EV v Col-0	0.787809	0.430809	IHW	1	ashr	0.0254833	0.0583575
DAS30	AT3G25480	1948.78	~genotype	Wald	EV v Col-0	-1.99515	0.046026	IHW	0.472891	ashr	-0.0638437	0.0696913
DAS30	AT3G25510	243.182	~genotype	Wald	EV v Col-0	0.712036	0.476443	IHW	1	ashr	0.0132679	0.0722118
DAS30	AT3G25590	268.351	~genotype	Wald	EV v Col-0	0.44658	0.655179	IHW	1	ashr	0.0120179	0.0647791
DAS30	AT3G25600	491.973	~genotype	Wald	EV v Col-0	0.142816	0.886435	IHW	1	ashr	0.00348649	0.0666228
DAS30	AT3G25610	998.925	~genotype	Wald	EV v Col-0	-0.883728	0.376843	IHW	0.855213	ashr	-0.0223031	0.0677153
DAS30	AT3G25660	6491.87	~genotype	Wald	EV v Col-0	-2.35939	0.0183052	IHW	0.207509	ashr	-0.0828735	0.0670999
DAS30	AT3G25805	1146.56	~genotype	Wald	EV v Col-0	-1.86852	0.0616897	IHW	0.514124	ashr	-0.0580668	0.0693803
DAS30	AT3G25920	21362.4	~genotype	Wald	EV v Col-0	-2.45986	0.013899	IHW	0.191284	ashr	-0.0881039	0.0653986
DAS30	AT3G26060	13464.5	~genotype	Wald	EV v Col-0	-3.83605	0.000125027	IHW	0.0253361	ashr	-0.221237	0.14639
DAS30	AT3G26200	564.544	~genotype	Wald	EV v Col-0	0.338279	0.735153	IHW	1	ashr	0.00649488	0.0707591
DAS30	AT3G26220	773.677	~genotype	Wald	EV v Col-0	0.903038	0.366506	IHW	0.8305	ashr	0.0162211	0.0735611
DAS30	AT3G26280	1610.65	~genotype	Wald	EV v Col-0	-0.854302	0.392938	IHW	1	ashr	-0.0271001	0.0597085
DAS30	AT3G26510	1754.85	~genotype	Wald	EV v Col-0	-0.783399	0.433393	IHW	1	ashr	-0.0236013	0.0619394
DAS30	AT3G26570	14803.7	~genotype	Wald	EV v Col-0	-1.77444	0.0759899	IHW	0.44862	ashr	-0.0463778	0.0761655
DAS30	AT3G26590	1103.84	~genotype	Wald	EV v Col-0	-0.47715	0.633255	IHW	0.957502	ashr	-0.0128355	0.0648457
DAS30	AT3G26710	4329.51	~genotype	Wald	EV v Col-0	-0.503484	0.614624	IHW	1	ashr	-0.0144312	0.0630701
DAS30	AT3G26720	2909.18	~genotype	Wald	EV v Col-0	0.859141	0.390263	IHW	0.865613	ashr	0.029068	0.0545827
DAS30	AT3G26840	1099.44	~genotype	Wald	EV v Col-0	-1.4788	0.139192	IHW	0.632352	ashr	-0.0277431	0.0778956
DAS30	AT3G26900	2832.68	~genotype	Wald	EV v Col-0	-0.694113	0.487611	IHW	0.892322	ashr	-0.0215756	0.0603301
DAS30	AT3G26910	455.292	~genotype	Wald	EV v Col-0	-0.00418962	0.996657	IHW	1	ashr	-0.000111448	0.0646849
DAS30	AT3G26950	1321.38	~genotype	Wald	EV v Col-0	-0.852486	0.393944	IHW	0.836516	ashr	-0.0291134	0.0530887
DAS30	AT3G27160	12218.3	~genotype	Wald	EV v Col-0	-2.20599	0.0273847	IHW	0.295768	ashr	-0.0756995	0.0665949
DAS30	AT3G27260	2519.94	~genotype	Wald	EV v Col-0	2.5605	0.0104521	IHW	0.267283	ashr	0.090956	0.076054
DAS30	AT3G27560	554.823	~genotype	Wald	EV v Col-0	-0.128625	0.897654	IHW	1	ashr	-0.00435379	0.0533778
DAS30	AT3G27690	74431.3	~genotype	Wald	EV v Col-0	-0.794663	0.426809	IHW	0.728246	ashr	-0.0180924	0.0694735
DAS30	AT3G27820	5203.39	~genotype	Wald	EV v Col-0	-1.06597	0.286438	IHW	0.645884	ashr	-0.0364051	0.0460027
DAS30	AT3G27830	17644.9	~genotype	Wald	EV v Col-0	-4.26899	1.96359e-05	IHW	0.0085772	ashr	-0.298576	0.153011
DAS30	AT3G28210	75.7788	~genotype	Wald	EV v Col-0	0.504982	0.613571	IHW	1	ashr	0.00590578	0.0756212
DAS30	AT3G28340	217.254	~genotype	Wald	EV v Col-0	-1.99544	0.0459953	IHW	0.760214	ashr	-0.0391194	0.0860646
DAS30	AT3G28450	1145.2	~genotype	Wald	EV v Col-0	0.0379679	0.969713	IHW	1	ashr	0.00103445	0.0640796
DAS30	AT3G28460	1353.29	~genotype	Wald	EV v Col-0	-2.20684	0.0273256	IHW	0.402204	ashr	-0.077843	0.0601672
DAS30	AT3G28580	311.485	~genotype	Wald	EV v Col-0	-0.0273834	0.978154	IHW	1	ashr	-0.000441643	0.0725208
DAS30	AT3G28760	783.779	~genotype	Wald	EV v Col-0	-1.39228	0.163838	IHW	0.659337	ashr	-0.0460879	0.0591886
DAS30	AT3G28950	697.737	~genotype	Wald	EV v Col-0	-0.589256	0.55569	IHW	1	ashr	-0.0182487	0.0602817
DAS30	AT3G29185	2548.17	~genotype	Wald	EV v Col-0	0.211253	0.83269	IHW	1	ashr	0.00721194	0.0518805
DAS30	AT3G29280	196.971	~genotype	Wald	EV v Col-0	0.259697	0.795097	IHW	1	ashr	0.00666722	0.0656519
DAS30	AT3G29631	257.936	~genotype	Wald	EV v Col-0	0.635034	0.525406	IHW	1	ashr	0.0118247	0.0719301
DAS30	AT3G30390	10127.3	~genotype	Wald	EV v Col-0	-2.34264	0.0191479	IHW	0.341289	ashr	-0.0837563	0.0552832
DAS30	AT3G43190	161.865	~genotype	Wald	EV v Col-0	-0.0768833	0.938716	IHW	1	ashr	-0.000938128	0.0748786
DAS30	AT3G43610	1720.24	~genotype	Wald	EV v Col-0	1.43341	0.151741	IHW	0.658387	ashr	0.0474211	0.059519
DAS30	AT3G44400	751.47	~genotype	Wald	EV v Col-0	0.682896	0.494672	IHW	0.993851	ashr	0.0175934	0.0664392
DAS30	AT3G44670	4164.7	~genotype	Wald	EV v Col-0	1.83944	0.0658511	IHW	0.526504	ashr	0.0562755	0.0698978
DAS30	AT3G44890	10778.7	~genotype	Wald	EV v Col-0	-1.43066	0.152528	IHW	0.467964	ashr	-0.0466544	0.0606781
DAS30	AT3G45040	997.141	~genotype	Wald	EV v Col-0	-0.418887	0.675299	IHW	0.974906	ashr	-0.0114663	0.06428
DAS30	AT3G45640	6173.44	~genotype	Wald	EV v Col-0	0.927541	0.353646	IHW	0.686856	ashr	0.0231089	0.0682349
DAS30	AT3G45650	250.106	~genotype	Wald	EV v Col-0	0.585493	0.558216	IHW	1	ashr	0.0139209	0.0678844
DAS30	AT3G45730	218.189	~genotype	Wald	EV v Col-0	0.890637	0.373124	IHW	1	ashr	0.0201364	0.0700685
DAS30	AT3G45850	2344.05	~genotype	Wald	EV v Col-0	1.53433	0.124948	IHW	0.631839	ashr	0.0463064	0.0663512
DAS30	AT3G45980	5656.12	~genotype	Wald	EV v Col-0	1.19229	0.233148	IHW	0.7325	ashr	0.0330071	0.0669202
DAS30	AT3G46090	291.376	~genotype	Wald	EV v Col-0	0.0820052	0.934643	IHW	1	ashr	0.000858648	0.0757805
DAS30	AT3G46200	300.011	~genotype	Wald	EV v Col-0	0.461924	0.644136	IHW	1	ashr	0.0147187	0.0586339
DAS30	AT3G46530	2099.88	~genotype	Wald	EV v Col-0	1.01452	0.310334	IHW	0.82647	ashr	0.0336837	0.05708
DAS30	AT3G46730	19.4713	~genotype	Wald	EV v Col-0	-1.67569	0.0937983	IHW	1	ashr	-0.0187096	0.0809595
DAS30	AT3G46920	525.251	~genotype	Wald	EV v Col-0	1.19015	0.233987	IHW	0.819881	ashr	0.0393152	0.0582404
DAS30	AT3G46930	282.839	~genotype	Wald	EV v Col-0	0.905727	0.365081	IHW	0.962963	ashr	0.0250318	0.0653833
DAS30	AT3G47160	1425.89	~genotype	Wald	EV v Col-0	1.86417	0.0622982	IHW	0.50467	ashr	0.0471546	0.079169
DAS30	AT3G47550	1724.68	~genotype	Wald	EV v Col-0	-0.978453	0.32785	IHW	0.824542	ashr	-0.0304697	0.0611017
DAS30	AT3G47650	7800.45	~genotype	Wald	EV v Col-0	-2.26281	0.0236474	IHW	0.280032	ashr	-0.0775072	0.0687961
DAS30	AT3G47800	4329.81	~genotype	Wald	EV v Col-0	0.769371	0.441673	IHW	1	ashr	0.0200065	0.0665093
DAS30	AT3G47820	684.886	~genotype	Wald	EV v Col-0	-0.921504	0.356788	IHW	0.910525	ashr	-0.0265265	0.0641287
DAS30	AT3G47860	2086.64	~genotype	Wald	EV v Col-0	-0.953922	0.340123	IHW	0.831307	ashr	-0.0234325	0.0687002
DAS30	AT3G48020	46.5334	~genotype	Wald	EV v Col-0	-1.5483	0.121551	IHW	1	ashr	-0.0186531	0.0801088
DAS30	AT3G48110	4633.46	~genotype	Wald	EV v Col-0	-1.50992	0.131063	IHW	0.635537	ashr	-0.0506736	0.0586924
DAS30	AT3G48187	226.382	~genotype	Wald	EV v Col-0	1.62978	0.103149	IHW	0.762762	ashr	0.0501452	0.0663797
DAS30	AT3G48730	9538.35	~genotype	Wald	EV v Col-0	-2.93199	0.00336798	IHW	0.170911	ashr	-0.112633	0.0799163
DAS30	AT3G49140	4811.23	~genotype	Wald	EV v Col-0	1.71128	0.0870302	IHW	0.378867	ashr	0.0582667	0.0587706
DAS30	AT3G49210	342.98	~genotype	Wald	EV v Col-0	-0.686137	0.492627	IHW	1	ashr	-0.0144536	0.0703636
DAS30	AT3G49250	941.831	~genotype	Wald	EV v Col-0	1.76952	0.0768068	IHW	0.547175	ashr	0.0591343	0.0616919
DAS30	AT3G49260	2704.86	~genotype	Wald	EV v Col-0	-0.23059	0.817633	IHW	1	ashr	-0.00630983	0.0640592
DAS30	AT3G49470	3394.57	~genotype	Wald	EV v Col-0	0.0646428	0.948458	IHW	1	ashr	0.00208401	0.0576534
DAS30	AT3G49530	974.02	~genotype	Wald	EV v Col-0	0.727579	0.466871	IHW	0.900744	ashr	0.0203728	0.0643375
DAS30	AT3G49650	540.537	~genotype	Wald	EV v Col-0	1.12178	0.261954	IHW	0.84952	ashr	0.0328353	0.0644791
DAS30	AT3G49670	3695.39	~genotype	Wald	EV v Col-0	-1.13554	0.25615	IHW	0.767334	ashr	-0.0359288	0.0609241
DAS30	AT3G49680	8236.28	~genotype	Wald	EV v Col-0	-2.16353	0.0305006	IHW	0.308164	ashr	-0.0650864	0.079718
DAS30	AT3G49790	529.466	~genotype	Wald	EV v Col-0	1.52443	0.127401	IHW	0.745995	ashr	0.0333334	0.0764096
DAS30	AT3G49800	1655.36	~genotype	Wald	EV v Col-0	0.341602	0.732651	IHW	0.993851	ashr	0.00866899	0.0660121
DAS30	AT3G50240	1782.13	~genotype	Wald	EV v Col-0	2.31026	0.0208735	IHW	0.371288	ashr	0.0750333	0.0785418
DAS30	AT3G50470	279.868	~genotype	Wald	EV v Col-0	0.392797	0.694469	IHW	1	ashr	0.00623	0.0730688
DAS30	AT3G50685	4731.54	~genotype	Wald	EV v Col-0	-3.95622	7.61449e-05	IHW	0.00895242	ashr	-0.240082	0.148333
DAS30	AT3G50910	951.078	~genotype	Wald	EV v Col-0	0.00351268	0.997197	IHW	1	ashr	0.000108684	0.0597909
DAS30	AT3G50930	1430.98	~genotype	Wald	EV v Col-0	0.272351	0.785352	IHW	1	ashr	0.00632019	0.0677084
DAS30	AT3G50950	6701.99	~genotype	Wald	EV v Col-0	0.139207	0.889286	IHW	1	ashr	0.00312601	0.0681611
DAS30	AT3G51070	184.186	~genotype	Wald	EV v Col-0	0.0151397	0.987921	IHW	1	ashr	0.000418308	0.0637009
DAS30	AT3G51080	370.025	~genotype	Wald	EV v Col-0	-1.21311	0.225088	IHW	0.939892	ashr	-0.0393355	0.0597673
DAS30	AT3G51150	1218.77	~genotype	Wald	EV v Col-0	0.622455	0.533642	IHW	0.914313	ashr	0.0174588	0.0639969
DAS30	AT3G51230	112.273	~genotype	Wald	EV v Col-0	-0.734433	0.462685	IHW	1	ashr	-0.0160403	0.069959
DAS30	AT3G51470	267.633	~genotype	Wald	EV v Col-0	-2.70176	0.00689737	IHW	0.333839	ashr	-0.0902562	0.102756
DAS30	AT3G51730	5232.57	~genotype	Wald	EV v Col-0	0.225197	0.821826	IHW	0.745876	ashr	0.00666014	0.0616671
DAS30	AT3G51820	9844.42	~genotype	Wald	EV v Col-0	-2.07888	0.037628	IHW	0.44862	ashr	-0.0709795	0.0641033
DAS30	AT3G51960	146.64	~genotype	Wald	EV v Col-0	-0.993095	0.320664	IHW	1	ashr	-0.0181924	0.0738575
DAS30	AT3G52150	11817.4	~genotype	Wald	EV v Col-0	-2.18191	0.0291161	IHW	0.311639	ashr	-0.0750967	0.0653517
DAS30	AT3G52400	2334.81	~genotype	Wald	EV v Col-0	0.310823	0.755935	IHW	1	ashr	0.00524906	0.0722691
DAS30	AT3G52710	946.853	~genotype	Wald	EV v Col-0	-0.134158	0.893278	IHW	1	ashr	-0.0037345	0.063525
DAS30	AT3G52750	2856.53	~genotype	Wald	EV v Col-0	-1.38947	0.16469	IHW	0.674536	ashr	-0.0465096	0.0581194
DAS30	AT3G52800	1617.82	~genotype	Wald	EV v Col-0	-1.50167	0.133183	IHW	0.639448	ashr	-0.0437893	0.0676458
DAS30	AT3G52840	4765.61	~genotype	Wald	EV v Col-0	-1.24037	0.21484	IHW	0.731302	ashr	-0.0355068	0.0660811
DAS30	AT3G52890	1467.8	~genotype	Wald	EV v Col-0	0.820259	0.412068	IHW	0.877047	ashr	0.0267319	0.0579391
DAS30	AT3G52900	321.012	~genotype	Wald	EV v Col-0	0.879433	0.379167	IHW	1	ashr	0.0213735	0.0685521
DAS30	AT3G52960	7446.14	~genotype	Wald	EV v Col-0	-3.10291	0.0019163	IHW	0.122861	ashr	-0.119663	0.135025
DAS30	AT3G53130	2171.06	~genotype	Wald	EV v Col-0	-0.17986	0.857263	IHW	1	ashr	-0.00603522	0.0544937
DAS30	AT3G53190	2407.62	~genotype	Wald	EV v Col-0	-0.314985	0.752773	IHW	1	ashr	-0.0093754	0.0615134
DAS30	AT3G53310	268.278	~genotype	Wald	EV v Col-0	0.559165	0.576049	IHW	1	ashr	0.012151	0.0694339
DAS30	AT3G53470	1447.3	~genotype	Wald	EV v Col-0	0.546066	0.585021	IHW	0.957318	ashr	0.0178722	0.05706
DAS30	AT3G53580	4225.6	~genotype	Wald	EV v Col-0	-0.591333	0.554298	IHW	0.946098	ashr	-0.0197486	0.0554408
DAS30	AT3G53850	531.145	~genotype	Wald	EV v Col-0	-0.75712	0.448978	IHW	0.968787	ashr	-0.024644	0.0578646
DAS30	AT3G53900	1446.92	~genotype	Wald	EV v Col-0	-1.79096	0.0733003	IHW	0.549067	ashr	-0.0524339	0.071584
DAS30	AT3G54050	35328	~genotype	Wald	EV v Col-0	-0.82576	0.40894	IHW	0.72054	ashr	-0.0203074	0.0680447
DAS30	AT3G54100	721.968	~genotype	Wald	EV v Col-0	0.221415	0.824769	IHW	1	ashr	0.00673576	0.0605884
DAS30	AT3G54150	149.051	~genotype	Wald	EV v Col-0	0.48657	0.626563	IHW	1	ashr	0.00808571	0.0728015
DAS30	AT3G54210	16556.1	~genotype	Wald	EV v Col-0	-2.72559	0.0064186	IHW	0.125029	ashr	-0.100839	0.0704549
DAS30	AT3G54640	3344.38	~genotype	Wald	EV v Col-0	-0.68093	0.495916	IHW	0.929329	ashr	-0.0189739	0.0643476
DAS30	AT3G54650	1242.63	~genotype	Wald	EV v Col-0	-0.73397	0.462967	IHW	0.881737	ashr	-0.0213173	0.06317
DAS30	AT3G54920	4428.28	~genotype	Wald	EV v Col-0	-1.66307	0.0962989	IHW	0.595656	ashr	-0.050443	0.067628
DAS30	AT3G55250	3587.33	~genotype	Wald	EV v Col-0	-1.73889	0.0820544	IHW	0.557003	ashr	-0.0594316	0.0585276
DAS30	AT3G55270	2223.09	~genotype	Wald	EV v Col-0	-0.0548993	0.956219	IHW	1	ashr	-0.00185643	0.0534986
DAS30	AT3G55320	1197.83	~genotype	Wald	EV v Col-0	-0.289619	0.772108	IHW	1	ashr	-0.00983735	0.0529423
DAS30	AT3G55470	477.23	~genotype	Wald	EV v Col-0	0.313428	0.753955	IHW	1	ashr	0.00844044	0.0645637
DAS30	AT3G55740	700.789	~genotype	Wald	EV v Col-0	0.0292054	0.976701	IHW	1	ashr	0.000913995	0.0592606
DAS30	AT3G55800	41039.1	~genotype	Wald	EV v Col-0	-2.15233	0.0313715	IHW	0.41444	ashr	-0.0683646	0.0747493
DAS30	AT3G55880	956.953	~genotype	Wald	EV v Col-0	-0.646798	0.517763	IHW	0.896052	ashr	-0.0143767	0.0693268
DAS30	AT3G55890	46.8672	~genotype	Wald	EV v Col-0	-0.0064919	0.99482	IHW	1	ashr	-8.87716e-05	0.07403
DAS30	AT3G55910	15.4524	~genotype	Wald	EV v Col-0	0.252579	0.800594	IHW	1	ashr	0.00268127	0.0758032
DAS30	AT3G55950	272.491	~genotype	Wald	EV v Col-0	-0.313892	0.753603	IHW	1	ashr	-0.00705912	0.0683212
DAS30	AT3G55960	1380.76	~genotype	Wald	EV v Col-0	-0.239551	0.810679	IHW	1	ashr	-0.00821996	0.0499115
DAS30	AT3G56030	144.346	~genotype	Wald	EV v Col-0	-0.946318	0.343986	IHW	1	ashr	-0.021043	0.0706835
DAS30	AT3G56040	4144.28	~genotype	Wald	EV v Col-0	0.203172	0.839001	IHW	1	ashr	0.00619437	0.0604863
DAS30	AT3G56130	2391.96	~genotype	Wald	EV v Col-0	-0.119789	0.904651	IHW	1	ashr	-0.00383311	0.0581109
DAS30	AT3G56410	1332.42	~genotype	Wald	EV v Col-0	0.357518	0.720704	IHW	1	ashr	0.0107309	0.0612444
DAS30	AT3G56910	13916.4	~genotype	Wald	EV v Col-0	-1.70935	0.0873853	IHW	0.467964	ashr	-0.0536723	0.0661197
DAS30	AT3G56940	90670.8	~genotype	Wald	EV v Col-0	-1.8456	0.064951	IHW	0.343556	ashr	-0.0644529	0.0551831
DAS30	AT3G57030	1458.45	~genotype	Wald	EV v Col-0	-0.795017	0.426603	IHW	0.896052	ashr	-0.0244244	0.0611344
DAS30	AT3G57050	4542.1	~genotype	Wald	EV v Col-0	-1.0011	0.31678	IHW	0.819881	ashr	-0.0329286	0.0578115
DAS30	AT3G57530	1397.83	~genotype	Wald	EV v Col-0	1.22425	0.220857	IHW	0.748816	ashr	0.0398433	0.0595637
DAS30	AT3G57540	150.212	~genotype	Wald	EV v Col-0	-1.96939	0.0489078	IHW	0.840639	ashr	-0.0418676	0.0850035
DAS30	AT3G57560	1810.99	~genotype	Wald	EV v Col-0	-2.22162	0.026309	IHW	0.387763	ashr	-0.0697039	0.0784474
DAS30	AT3G57680	210.781	~genotype	Wald	EV v Col-0	0.498509	0.618125	IHW	1	ashr	0.0106579	0.0695334
DAS30	AT3G57750	441.872	~genotype	Wald	EV v Col-0	0.72742	0.466969	IHW	1	ashr	0.0180701	0.067429
DAS30	AT3G58120	1619.73	~genotype	Wald	EV v Col-0	-2.42188	0.0154406	IHW	0.320626	ashr	-0.0767471	0.0872798
DAS30	AT3G58140	6102.8	~genotype	Wald	EV v Col-0	-2.25029	0.0244302	IHW	0.372137	ashr	-0.0801091	0.0555594
DAS30	AT3G58600	928.709	~genotype	Wald	EV v Col-0	0.841384	0.400133	IHW	0.840381	ashr	0.0236792	0.0645642
DAS30	AT3G59090	1345.32	~genotype	Wald	EV v Col-0	-0.223776	0.822931	IHW	1	ashr	-0.00704385	0.0590448
DAS30	AT3G59660	1759.15	~genotype	Wald	EV v Col-0	0.737088	0.461069	IHW	0.913951	ashr	0.0216582	0.0627667
DAS30	AT3G59700	204.938	~genotype	Wald	EV v Col-0	-0.494133	0.621212	IHW	1	ashr	-0.0109518	0.0689268
DAS30	AT3G59780	11562.2	~genotype	Wald	EV v Col-0	-0.979571	0.327298	IHW	0.824284	ashr	-0.0308113	0.0605889
DAS30	AT3G59940	7161.84	~genotype	Wald	EV v Col-0	2.63406	0.00843715	IHW	0.194729	ashr	0.0880921	0.0962453
DAS30	AT3G59970	15445.5	~genotype	Wald	EV v Col-0	-1.82527	0.0679604	IHW	0.429145	ashr	-0.058324	0.0665426
DAS30	AT3G60110	241.19	~genotype	Wald	EV v Col-0	0.257832	0.796536	IHW	1	ashr	0.00685609	0.0648209
DAS30	AT3G60140	163.686	~genotype	Wald	EV v Col-0	1.84849	0.0645316	IHW	0.856215	ashr	0.00961143	0.0825238
DAS30	AT3G60180	412.542	~genotype	Wald	EV v Col-0	0.899967	0.368138	IHW	0.917244	ashr	0.0245992	0.065688
DAS30	AT3G60210	1695.9	~genotype	Wald	EV v Col-0	-2.69158	0.00711136	IHW	0.238566	ashr	-0.0982838	0.0778064
DAS30	AT3G60370	1515.89	~genotype	Wald	EV v Col-0	-0.30833	0.757831	IHW	1	ashr	-0.00886193	0.0627018
DAS30	AT3G60966	62.7649	~genotype	Wald	EV v Col-0	-1.14633	0.251659	IHW	1	ashr	-0.0126234	0.0778938
DAS30	AT3G61060	1396.44	~genotype	Wald	EV v Col-0	1.92966	0.0536487	IHW	0.50467	ashr	0.0362257	0.0848375
DAS30	AT3G61180	1974.21	~genotype	Wald	EV v Col-0	-0.236183	0.813291	IHW	1	ashr	-0.00808306	0.0512175
DAS30	AT3G61190	170.183	~genotype	Wald	EV v Col-0	-0.722542	0.469961	IHW	1	ashr	-0.00869824	0.0759869
DAS30	AT3G61870	11599	~genotype	Wald	EV v Col-0	-3.98045	6.87846e-05	IHW	0.0085772	ashr	-0.264999	0.172215
DAS30	AT3G62030	36145.9	~genotype	Wald	EV v Col-0	-2.57869	0.0099177	IHW	0.20581	ashr	-0.0929171	0.0718185
DAS30	AT3G62120	5847.64	~genotype	Wald	EV v Col-0	-0.71696	0.473399	IHW	0.73442	ashr	-0.024004	0.0432247
DAS30	AT3G62260	348.358	~genotype	Wald	EV v Col-0	-2.29761	0.0215841	IHW	0.505215	ashr	-0.0719661	0.0818835
DAS30	AT3G62390	532.071	~genotype	Wald	EV v Col-0	-0.845458	0.397855	IHW	1	ashr	-0.0239262	0.0644022
DAS30	AT3G62420	1746.26	~genotype	Wald	EV v Col-0	0.657142	0.51109	IHW	0.904164	ashr	0.0159279	0.0677144
DAS30	AT3G62530	14252.2	~genotype	Wald	EV v Col-0	-2.23439	0.0254573	IHW	0.286809	ashr	-0.072393	0.0756117
DAS30	AT3G62910	2186.63	~genotype	Wald	EV v Col-0	-0.303207	0.761732	IHW	1	ashr	-0.00867773	0.0628305
DAS30	AT3G63050	29.7215	~genotype	Wald	EV v Col-0	-0.302255	0.762457	IHW	1	ashr	-0.00444515	0.0736233
DAS30	AT3G63200	1272.12	~genotype	Wald	EV v Col-0	-2.31824	0.0204361	IHW	0.349938	ashr	-0.0756553	0.0783157
DAS30	AT3G63310	1532.69	~genotype	Wald	EV v Col-0	0.236959	0.812688	IHW	1	ashr	0.0077819	0.0564676
DAS30	AT3G63410	19211.3	~genotype	Wald	EV v Col-0	-2.73315	0.00627319	IHW	0.21857	ashr	-0.101223	0.0709362
DAS30	AT3G63490	20086.5	~genotype	Wald	EV v Col-0	-2.47742	0.0132336	IHW	0.231758	ashr	-0.0892606	0.0629396
DAS30	AT3G63510	819.152	~genotype	Wald	EV v Col-0	-2.42449	0.0153298	IHW	0.309019	ashr	-0.0777883	0.0860732
DAS30	AT4G00355	2262.11	~genotype	Wald	EV v Col-0	0.844384	0.398455	IHW	0.872617	ashr	0.0224401	0.0662404
DAS30	AT4G00400	1916.96	~genotype	Wald	EV v Col-0	-1.87828	0.0603423	IHW	0.512698	ashr	-0.06341	0.061997
DAS30	AT4G00810	3950.69	~genotype	Wald	EV v Col-0	-0.436167	0.662715	IHW	0.99231	ashr	-0.0110708	0.0661646
DAS30	AT4G01000	3051.67	~genotype	Wald	EV v Col-0	1.90419	0.0568858	IHW	0.608466	ashr	0.0584475	0.0709572
DAS30	AT4G01010	608.698	~genotype	Wald	EV v Col-0	0.380825	0.703333	IHW	1	ashr	0.00768242	0.0701509
DAS30	AT4G01040	1248.31	~genotype	Wald	EV v Col-0	-0.528128	0.597411	IHW	0.961231	ashr	-0.0158799	0.0614234
DAS30	AT4G01050	26754.6	~genotype	Wald	EV v Col-0	-1.26008	0.207639	IHW	0.708408	ashr	-0.0435907	0.0511206
DAS30	AT4G01150	40578.5	~genotype	Wald	EV v Col-0	-4.23111	2.32544e-05	IHW	0.00933571	ashr	-0.251749	0.126097
DAS30	AT4G01290	5240.16	~genotype	Wald	EV v Col-0	0.230543	0.81767	IHW	0.745703	ashr	0.0072312	0.0592258
DAS30	AT4G01310	13756.4	~genotype	Wald	EV v Col-0	-2.58186	0.00982684	IHW	0.200697	ashr	-0.0915212	0.0786331
DAS30	AT4G01480	1366.54	~genotype	Wald	EV v Col-0	-1.58863	0.112144	IHW	0.626436	ashr	-0.0450671	0.0698967
DAS30	AT4G01610	4355.97	~genotype	Wald	EV v Col-0	0.157735	0.874666	IHW	1	ashr	0.0032796	0.0694054
DAS30	AT4G01690	9366.96	~genotype	Wald	EV v Col-0	-0.581857	0.560663	IHW	0.945855	ashr	-0.0196698	0.0540453
DAS30	AT4G01800	9194.37	~genotype	Wald	EV v Col-0	0.694414	0.487423	IHW	0.740496	ashr	0.0220383	0.059269
DAS30	AT4G01840	452.035	~genotype	Wald	EV v Col-0	-2.08351	0.037205	IHW	0.486859	ashr	-0.0677809	0.0702812
DAS30	AT4G01900	1899.78	~genotype	Wald	EV v Col-0	-1.65828	0.0972606	IHW	0.565635	ashr	-0.0517053	0.0659189
DAS30	AT4G02280	175.187	~genotype	Wald	EV v Col-0	0.639426	0.522546	IHW	1	ashr	0.0118021	0.0720566
DAS30	AT4G02350	1600.84	~genotype	Wald	EV v Col-0	0.495073	0.620549	IHW	0.971564	ashr	0.0167629	0.0536796
DAS30	AT4G02380	3435.18	~genotype	Wald	EV v Col-0	0.302095	0.762579	IHW	1	ashr	0.00629622	0.0695326
DAS30	AT4G02410	1171.44	~genotype	Wald	EV v Col-0	0.563823	0.572875	IHW	0.928868	ashr	0.0174796	0.0601853
DAS30	AT4G02530	9482.16	~genotype	Wald	EV v Col-0	-1.9237	0.054392	IHW	0.379124	ashr	-0.0547327	0.0759112
DAS30	AT4G02580	4335.25	~genotype	Wald	EV v Col-0	-1.45167	0.146595	IHW	0.664175	ashr	-0.0494723	0.0563742
DAS30	AT4G02770	96280.2	~genotype	Wald	EV v Col-0	-2.62381	0.00869516	IHW	0.246386	ashr	-0.0940247	0.0787941
DAS30	AT4G02850	977.053	~genotype	Wald	EV v Col-0	-2.8272	0.00469574	IHW	0.203041	ashr	-0.0653615	0.115428
DAS30	AT4G03260	6537.93	~genotype	Wald	EV v Col-0	0.559698	0.575686	IHW	0.775482	ashr	0.0189251	0.0539748
DAS30	AT4G03270	243.476	~genotype	Wald	EV v Col-0	-1.60314	0.108903	IHW	0.976712	ashr	-0.0434299	0.0719264
DAS30	AT4G03320	92.4103	~genotype	Wald	EV v Col-0	-0.0870051	0.930667	IHW	1	ashr	-0.00155984	0.0713561
DAS30	AT4G04350	3106.74	~genotype	Wald	EV v Col-0	0.18726	0.851457	IHW	1	ashr	0.00626746	0.0547725
DAS30	AT4G04620	576.03	~genotype	Wald	EV v Col-0	-0.776187	0.437639	IHW	0.967835	ashr	-0.0211482	0.0652969
DAS30	AT4G04960	634.086	~genotype	Wald	EV v Col-0	-1.44977	0.147124	IHW	0.738269	ashr	-0.0468419	0.0615043
DAS30	AT4G05590	401.093	~genotype	Wald	EV v Col-0	0.0573738	0.954247	IHW	1	ashr	0.00144268	0.0659765
DAS30	AT4G07390	1306.27	~genotype	Wald	EV v Col-0	-1.00145	0.31661	IHW	0.817055	ashr	-0.0322876	0.0592278
DAS30	AT4G08500	1335.78	~genotype	Wald	EV v Col-0	0.667662	0.504349	IHW	0.900717	ashr	0.0226611	0.0536482
DAS30	AT4G08510	454.749	~genotype	Wald	EV v Col-0	2.0793	0.0375897	IHW	0.501704	ashr	0.0723656	0.0605806
DAS30	AT4G08685	1420.81	~genotype	Wald	EV v Col-0	-0.808474	0.418817	IHW	0.881306	ashr	-0.0200439	0.0677904
DAS30	AT4G08900	1012.95	~genotype	Wald	EV v Col-0	-0.774688	0.438524	IHW	0.86342	ashr	-0.0262143	0.0543333
DAS30	AT4G08920	10421.6	~genotype	Wald	EV v Col-0	0.299594	0.764487	IHW	1	ashr	0.00929939	0.0597768
DAS30	AT4G08950	708.54	~genotype	Wald	EV v Col-0	-1.59956	0.109696	IHW	0.656185	ashr	-0.0432753	0.0719229
DAS30	AT4G08960	721.592	~genotype	Wald	EV v Col-0	-1.22926	0.218976	IHW	0.824792	ashr	-0.036538	0.0645008
DAS30	AT4G09010	16422.6	~genotype	Wald	EV v Col-0	-1.40194	0.160933	IHW	0.655462	ashr	-0.0456013	0.0606676
DAS30	AT4G09040	3707.19	~genotype	Wald	EV v Col-0	-0.434542	0.663895	IHW	0.992645	ashr	-0.0145144	0.0551935
DAS30	AT4G09340	613.712	~genotype	Wald	EV v Col-0	2.29036	0.0220004	IHW	0.454766	ashr	0.0805625	0.0639098
DAS30	AT4G09650	42907.8	~genotype	Wald	EV v Col-0	-3.75631	0.000172436	IHW	0.0205578	ashr	-0.177698	0.101174
DAS30	AT4G09750	579.31	~genotype	Wald	EV v Col-0	0.889575	0.373694	IHW	0.945855	ashr	0.0208517	0.0693614
DAS30	AT4G09830	1296.27	~genotype	Wald	EV v Col-0	0.742491	0.45779	IHW	0.872392	ashr	0.0213621	0.0635167
DAS30	AT4G10030	1066.46	~genotype	Wald	EV v Col-0	-0.121912	0.902969	IHW	1	ashr	-0.00409005	0.0544887
DAS30	AT4G10040	902.476	~genotype	Wald	EV v Col-0	-2.00476	0.0449884	IHW	0.470135	ashr	-0.0483865	0.083978
DAS30	AT4G10380	450.016	~genotype	Wald	EV v Col-0	0.74935	0.453646	IHW	1	ashr	0.0142536	0.0721016
DAS30	AT4G10960	218.287	~genotype	Wald	EV v Col-0	-0.582392	0.560303	IHW	1	ashr	-0.0119472	0.0704136
DAS30	AT4G11100	1810.85	~genotype	Wald	EV v Col-0	0.891301	0.372768	IHW	0.87103	ashr	0.0260029	0.063534
DAS30	AT4G11160	1914.42	~genotype	Wald	EV v Col-0	0.553953	0.579611	IHW	0.958019	ashr	0.0185151	0.0552981
DAS30	AT4G11220	1692.92	~genotype	Wald	EV v Col-0	-0.360445	0.718515	IHW	1	ashr	-0.0117507	0.0570995
DAS30	AT4G11300	653.012	~genotype	Wald	EV v Col-0	0.71387	0.475307	IHW	0.984676	ashr	0.0181834	0.0668107
DAS30	AT4G11350	154.896	~genotype	Wald	EV v Col-0	-1.78019	0.0750451	IHW	0.872783	ashr	-0.0442092	0.0778844
DAS30	AT4G11670	873.88	~genotype	Wald	EV v Col-0	0.767991	0.442492	IHW	0.873164	ashr	0.0240542	0.06014
DAS30	AT4G11680	661.049	~genotype	Wald	EV v Col-0	-2.47596	0.0132879	IHW	0.366468	ashr	-0.0887958	0.0658334
DAS30	AT4G11850	2352.7	~genotype	Wald	EV v Col-0	-0.310185	0.75642	IHW	1	ashr	-0.00693106	0.0684258
DAS30	AT4G11860	1253.89	~genotype	Wald	EV v Col-0	1.34618	0.178243	IHW	0.688551	ashr	0.0425771	0.0621523
DAS30	AT4G11910	207.224	~genotype	Wald	EV v Col-0	-1.47779	0.139465	IHW	1	ashr	-0.01843	0.0795883
DAS30	AT4G11960	1255.11	~genotype	Wald	EV v Col-0	0.409387	0.682255	IHW	0.995247	ashr	0.0127188	0.0598523
DAS30	AT4G12070	952.247	~genotype	Wald	EV v Col-0	-0.825628	0.409015	IHW	0.872783	ashr	-0.0253582	0.0612367
DAS30	AT4G12080	103.382	~genotype	Wald	EV v Col-0	-1.3003	0.193499	IHW	1	ashr	-0.0287731	0.0735295
DAS30	AT4G12290	2734.37	~genotype	Wald	EV v Col-0	-0.164927	0.869002	IHW	1	ashr	-0.00441218	0.0645957
DAS30	AT4G12300	867.072	~genotype	Wald	EV v Col-0	0.316698	0.751473	IHW	1	ashr	0.0108716	0.048897
DAS30	AT4G12310	1005.39	~genotype	Wald	EV v Col-0	-1.0619	0.288281	IHW	0.791461	ashr	-0.0213119	0.073115
DAS30	AT4G12720	3419.15	~genotype	Wald	EV v Col-0	-0.14672	0.883353	IHW	1	ashr	-0.00253426	0.0718276
DAS30	AT4G12735	39.326	~genotype	Wald	EV v Col-0	0.276252	0.782355	IHW	1	ashr	0.0021484	0.0770503
DAS30	AT4G12970	474.707	~genotype	Wald	EV v Col-0	-1.27457	0.20246	IHW	0.804338	ashr	-0.034282	0.0684848
DAS30	AT4G13340	2882.9	~genotype	Wald	EV v Col-0	-2.96842	0.00299337	IHW	0.161424	ashr	-0.11537	0.0982272
DAS30	AT4G13395	64.152	~genotype	Wald	EV v Col-0	0.394802	0.692989	IHW	1	ashr	0.00544824	0.0743032
DAS30	AT4G13500	2405.38	~genotype	Wald	EV v Col-0	-0.922503	0.356266	IHW	0.842822	ashr	-0.0288996	0.0605954
DAS30	AT4G13510	5226.84	~genotype	Wald	EV v Col-0	-1.38781	0.165195	IHW	0.672141	ashr	-0.0378109	0.0691043
DAS30	AT4G13575	1974.64	~genotype	Wald	EV v Col-0	-1.2976	0.194426	IHW	0.857485	ashr	-0.0289486	0.0733476
DAS30	AT4G13670	2937.69	~genotype	Wald	EV v Col-0	0.0722486	0.942404	IHW	1	ashr	0.00234564	0.0572076
DAS30	AT4G13720	982.985	~genotype	Wald	EV v Col-0	-2.44899	0.0143255	IHW	0.309019	ashr	-0.088163	0.0609268
DAS30	AT4G13830	2924.45	~genotype	Wald	EV v Col-0	-0.0304176	0.975734	IHW	1	ashr	-0.000657968	0.0687351
DAS30	AT4G13920	549.549	~genotype	Wald	EV v Col-0	-0.664916	0.506104	IHW	1	ashr	-0.0189574	0.0635971
DAS30	AT4G14360	2979.73	~genotype	Wald	EV v Col-0	-2.15353	0.0312767	IHW	0.413955	ashr	-0.076234	0.0564935
DAS30	AT4G14365	2917.69	~genotype	Wald	EV v Col-0	-0.447504	0.654511	IHW	0.989158	ashr	-0.00627652	0.0742758
DAS30	AT4G14370	167.154	~genotype	Wald	EV v Col-0	0.661026	0.508595	IHW	1	ashr	0.0137844	0.0704292
DAS30	AT4G14710	3471.89	~genotype	Wald	EV v Col-0	0.243714	0.807452	IHW	1	ashr	0.00751733	0.0600163
DAS30	AT4G14870	2078.61	~genotype	Wald	EV v Col-0	-0.335431	0.7373	IHW	1	ashr	-0.00920639	0.0640879
DAS30	AT4G14960	20834	~genotype	Wald	EV v Col-0	-1.22371	0.221061	IHW	0.594282	ashr	-0.042224	0.0522172
DAS30	AT4G15130	777.627	~genotype	Wald	EV v Col-0	0.721936	0.470334	IHW	0.886511	ashr	0.0199446	0.064721
DAS30	AT4G15270	24.3201	~genotype	Wald	EV v Col-0	0.48942	0.624544	IHW	1	ashr	0.0059118	0.0754023
DAS30	AT4G15490	1375.04	~genotype	Wald	EV v Col-0	0.238772	0.811283	IHW	1	ashr	0.00558202	0.0675341
DAS30	AT4G15510	2509.42	~genotype	Wald	EV v Col-0	-2.75221	0.00591951	IHW	0.211631	ashr	-0.102218	0.0687479
DAS30	AT4G15530	6286.24	~genotype	Wald	EV v Col-0	-0.410606	0.681362	IHW	0.995141	ashr	-0.0101234	0.0667432
DAS30	AT4G15560	29421.4	~genotype	Wald	EV v Col-0	0.0358063	0.971437	IHW	1	ashr	0.00107407	0.0610688
DAS30	AT4G15800	865.528	~genotype	Wald	EV v Col-0	-3.09923	0.00194023	IHW	0.121062	ashr	-0.126288	0.106684
DAS30	AT4G15802	2302.52	~genotype	Wald	EV v Col-0	0.041179	0.967153	IHW	1	ashr	0.00129469	0.0590345
DAS30	AT4G16155	2827.31	~genotype	Wald	EV v Col-0	-0.826925	0.408279	IHW	0.886511	ashr	-0.0240215	0.0634557
DAS30	AT4G16190	16068.5	~genotype	Wald	EV v Col-0	0.360798	0.71825	IHW	0.989423	ashr	0.0100806	0.0636212
DAS30	AT4G16442	896.868	~genotype	Wald	EV v Col-0	-0.415205	0.677992	IHW	0.976118	ashr	-0.0111707	0.0647321
DAS30	AT4G16570	309.211	~genotype	Wald	EV v Col-0	-0.300654	0.763679	IHW	1	ashr	-0.0097025	0.0577099
DAS30	AT4G16745	209.599	~genotype	Wald	EV v Col-0	0.876345	0.380843	IHW	1	ashr	0.0184778	0.0712083
DAS30	AT4G16957	365.663	~genotype	Wald	EV v Col-0	1.56793	0.116898	IHW	0.813622	ashr	0.0461593	0.0679645
DAS30	AT4G16960	408.15	~genotype	Wald	EV v Col-0	1.56407	0.117802	IHW	0.709786	ashr	0.0368979	0.0754325
DAS30	AT4G16980	17216.4	~genotype	Wald	EV v Col-0	-4.47898	7.50016e-06	IHW	0.00541981	ashr	-0.39355	0.181645
DAS30	AT4G17070	910.184	~genotype	Wald	EV v Col-0	-0.550799	0.581772	IHW	0.920734	ashr	-0.0143423	0.0658174
DAS30	AT4G17190	1060.03	~genotype	Wald	EV v Col-0	-0.966647	0.333721	IHW	0.808876	ashr	-0.0328294	0.0544035
DAS30	AT4G17245	533.237	~genotype	Wald	EV v Col-0	-0.761083	0.446607	IHW	1	ashr	-0.0190876	0.0673398
DAS30	AT4G17250	587.363	~genotype	Wald	EV v Col-0	0.887298	0.374919	IHW	0.99283	ashr	0.0268444	0.0620971
DAS30	AT4G17300	3444.88	~genotype	Wald	EV v Col-0	-0.976663	0.328736	IHW	0.97939	ashr	-0.0329869	0.0551773
DAS30	AT4G17330	6450.25	~genotype	Wald	EV v Col-0	1.90104	0.0572973	IHW	0.504012	ashr	0.0592268	0.0698332
DAS30	AT4G17500	524.395	~genotype	Wald	EV v Col-0	1.46966	0.141654	IHW	0.710728	ashr	0.0296355	0.0769442
DAS30	AT4G17540	587.046	~genotype	Wald	EV v Col-0	-1.33745	0.181074	IHW	0.799745	ashr	-0.0445787	0.0582194
DAS30	AT4G17560	8082.84	~genotype	Wald	EV v Col-0	0.311307	0.755567	IHW	0.731302	ashr	0.0087773	0.0632949
DAS30	AT4G17600	6435.06	~genotype	Wald	EV v Col-0	-1.41053	0.158383	IHW	0.549067	ashr	-0.0467984	0.059106
DAS30	AT4G17670	336.909	~genotype	Wald	EV v Col-0	1.08913	0.276096	IHW	0.993264	ashr	0.0229037	0.072591
DAS30	AT4G17810	559.184	~genotype	Wald	EV v Col-0	-1.35249	0.17622	IHW	0.773981	ashr	-0.0393509	0.0663117
DAS30	AT4G17900	1234.15	~genotype	Wald	EV v Col-0	0.497565	0.61879	IHW	0.953338	ashr	0.0166747	0.0549376
DAS30	AT4G18010	1496.03	~genotype	Wald	EV v Col-0	0.992845	0.320785	IHW	0.823459	ashr	0.0260442	0.0672924
DAS30	AT4G18250	445.281	~genotype	Wald	EV v Col-0	-0.0452767	0.963887	IHW	1	ashr	-0.000910911	0.069831
DAS30	AT4G18370	2257.59	~genotype	Wald	EV v Col-0	0.425827	0.670234	IHW	0.995074	ashr	0.0106192	0.0665306
DAS30	AT4G18480	26384.8	~genotype	Wald	EV v Col-0	-1.56445	0.117713	IHW	0.428056	ashr	-0.049424	0.0640321
DAS30	AT4G18580	204.32	~genotype	Wald	EV v Col-0	1.09892	0.271804	IHW	0.990086	ashr	0.0265965	0.0699427
DAS30	AT4G18670	2047.36	~genotype	Wald	EV v Col-0	-1.25286	0.210255	IHW	0.730313	ashr	-0.0279063	0.0729445
DAS30	AT4G18880	1015.54	~genotype	Wald	EV v Col-0	0.72662	0.467459	IHW	0.884884	ashr	0.0181892	0.0672547
DAS30	AT4G18930	1700.65	~genotype	Wald	EV v Col-0	-0.429061	0.667879	IHW	1	ashr	-0.0125697	0.0622208
DAS30	AT4G18950	1268.42	~genotype	Wald	EV v Col-0	-0.287262	0.773911	IHW	0.995141	ashr	-0.00698385	0.0668395
DAS30	AT4G19010	335.799	~genotype	Wald	EV v Col-0	-0.0332866	0.973446	IHW	1	ashr	-0.00099103	0.0613476
DAS30	AT4G19380	359.706	~genotype	Wald	EV v Col-0	-0.555081	0.578839	IHW	1	ashr	-0.0107059	0.0712084
DAS30	AT4G19830	866.353	~genotype	Wald	EV v Col-0	-1.39428	0.163232	IHW	0.657578	ashr	-0.0427218	0.0642683
DAS30	AT4G19950	151.446	~genotype	Wald	EV v Col-0	-2.66164	0.00777606	IHW	0.35051	ashr	-0.084752	0.103978
DAS30	AT4G19985	1121.48	~genotype	Wald	EV v Col-0	-1.30481	0.191957	IHW	0.708209	ashr	-0.0435751	0.0578448
DAS30	AT4G20130	2786.81	~genotype	Wald	EV v Col-0	-1.37658	0.168641	IHW	0.824792	ashr	-0.0469939	0.0556079
DAS30	AT4G20270	1725.68	~genotype	Wald	EV v Col-0	0.350979	0.725604	IHW	1	ashr	0.0104955	0.0613786
DAS30	AT4G20360	53745.1	~genotype	Wald	EV v Col-0	-2.35863	0.0183427	IHW	0.334689	ashr	-0.0807873	0.0727333
DAS30	AT4G20480	1336.43	~genotype	Wald	EV v Col-0	-1.88932	0.0588486	IHW	0.489475	ashr	-0.0662741	0.0519399
DAS30	AT4G20760	1275.5	~genotype	Wald	EV v Col-0	-2.76922	0.0056191	IHW	0.207509	ashr	-0.103024	0.0755278
DAS30	AT4G20830	4254.11	~genotype	Wald	EV v Col-0	-0.747212	0.454936	IHW	0.879562	ashr	-0.0178224	0.0683672
DAS30	AT4G20870	986.732	~genotype	Wald	EV v Col-0	-0.989981	0.322183	IHW	0.799758	ashr	-0.0297806	0.0627325
DAS30	AT4G21070	319.252	~genotype	Wald	EV v Col-0	1.86552	0.0621082	IHW	0.559863	ashr	0.05481	0.0728624
DAS30	AT4G21120	346.379	~genotype	Wald	EV v Col-0	-0.571622	0.567578	IHW	1	ashr	-0.00968911	0.0728257
DAS30	AT4G21215	1098.17	~genotype	Wald	EV v Col-0	-0.396965	0.691394	IHW	0.998423	ashr	-0.00897922	0.0683614
DAS30	AT4G21280	55733.9	~genotype	Wald	EV v Col-0	-3.17303	0.00150859	IHW	0.0807345	ashr	-0.129986	0.0913086
DAS30	AT4G21390	173.994	~genotype	Wald	EV v Col-0	0.357178	0.720959	IHW	1	ashr	0.00688006	0.0707493
DAS30	AT4G21670	1309.64	~genotype	Wald	EV v Col-0	0.0434984	0.965304	IHW	1	ashr	0.00134242	0.0599078
DAS30	AT4G21760	206.347	~genotype	Wald	EV v Col-0	-0.309629	0.756843	IHW	1	ashr	-0.00493176	0.0728816
DAS30	AT4G21903	158.707	~genotype	Wald	EV v Col-0	-0.615175	0.538439	IHW	1	ashr	-0.0121277	0.0710983
DAS30	AT4G21980	1599.15	~genotype	Wald	EV v Col-0	0.192503	0.847348	IHW	1	ashr	0.00500341	0.0653093
DAS30	AT4G22240	7101.69	~genotype	Wald	EV v Col-0	0.351811	0.72498	IHW	0.723445	ashr	0.0111401	0.0588435
DAS30	AT4G22260	2233.5	~genotype	Wald	EV v Col-0	-0.261815	0.793464	IHW	1	ashr	-0.00800983	0.0603837
DAS30	AT4G22270	149.648	~genotype	Wald	EV v Col-0	-0.884188	0.376595	IHW	1	ashr	-0.0235502	0.0663495
DAS30	AT4G22290	1374.6	~genotype	Wald	EV v Col-0	0.356716	0.721305	IHW	1	ashr	0.010717	0.0612069
DAS30	AT4G22360	999.452	~genotype	Wald	EV v Col-0	1.27338	0.202882	IHW	0.7179	ashr	0.0420946	0.058601
DAS30	AT4G22490	1716.32	~genotype	Wald	EV v Col-0	0.521124	0.60228	IHW	1	ashr	0.00943491	0.0719209
DAS30	AT4G22850	388.383	~genotype	Wald	EV v Col-0	0.752863	0.451532	IHW	1	ashr	0.0248213	0.0569058
DAS30	AT4G22980	248.706	~genotype	Wald	EV v Col-0	-0.210135	0.833563	IHW	1	ashr	-0.00605064	0.0625572
DAS30	AT4G23010	1639.72	~genotype	Wald	EV v Col-0	-2.24689	0.0246471	IHW	0.378867	ashr	-0.0729748	0.0758207
DAS30	AT4G23030	169.51	~genotype	Wald	EV v Col-0	-0.499072	0.617729	IHW	1	ashr	-0.0108528	0.0692584
DAS30	AT4G23220	860.551	~genotype	Wald	EV v Col-0	1.21856	0.223012	IHW	0.711875	ashr	0.0297277	0.070687
DAS30	AT4G23450	58.7566	~genotype	Wald	EV v Col-0	0.233203	0.815604	IHW	1	ashr	0.00345718	0.0734649
DAS30	AT4G23500	810.619	~genotype	Wald	EV v Col-0	0.717395	0.473131	IHW	0.875829	ashr	0.0211375	0.0626118
DAS30	AT4G23570	2391.36	~genotype	Wald	EV v Col-0	0.896995	0.369721	IHW	0.832826	ashr	0.0253156	0.0646907
DAS30	AT4G23790	880.667	~genotype	Wald	EV v Col-0	-1.90541	0.0567269	IHW	0.483926	ashr	-0.0647405	0.0615673
DAS30	AT4G23820	4636.67	~genotype	Wald	EV v Col-0	-0.90733	0.364232	IHW	0.852523	ashr	-0.0209546	0.0697495
DAS30	AT4G23940	2885.73	~genotype	Wald	EV v Col-0	-0.232933	0.815813	IHW	1	ashr	-0.00664994	0.062843
DAS30	AT4G24000	176.923	~genotype	Wald	EV v Col-0	-2.12056	0.0339584	IHW	0.712785	ashr	-0.018847	0.0838577
DAS30	AT4G24090	1633.1	~genotype	Wald	EV v Col-0	-0.531553	0.595036	IHW	0.961825	ashr	-0.0147595	0.0640876
DAS30	AT4G24250	98.684	~genotype	Wald	EV v Col-0	-1.10269	0.270162	IHW	1	ashr	-0.0278011	0.0689926
DAS30	AT4G24450	561.622	~genotype	Wald	EV v Col-0	0.432224	0.665579	IHW	1	ashr	0.0114835	0.0650801
DAS30	AT4G24570	363.458	~genotype	Wald	EV v Col-0	-0.706271	0.48002	IHW	1	ashr	-0.0154241	0.0698481
DAS30	AT4G24620	5287.02	~genotype	Wald	EV v Col-0	-1.18533	0.235888	IHW	0.528246	ashr	-0.0355866	0.0637956
DAS30	AT4G24770	38329.8	~genotype	Wald	EV v Col-0	-1.23029	0.21859	IHW	0.73442	ashr	-0.0383176	0.0622902
DAS30	AT4G24930	3215.46	~genotype	Wald	EV v Col-0	-1.69887	0.0893433	IHW	0.685054	ashr	-0.0516427	0.0679981
DAS30	AT4G25050	19402.2	~genotype	Wald	EV v Col-0	-3.31455	0.000917911	IHW	0.0603902	ashr	-0.135562	0.0800505
DAS30	AT4G25080	20780.8	~genotype	Wald	EV v Col-0	-1.33377	0.18228	IHW	0.567095	ashr	-0.0417613	0.0626537
DAS30	AT4G25290	1763.19	~genotype	Wald	EV v Col-0	-0.110976	0.911636	IHW	1	ashr	-0.00357388	0.0577303
DAS30	AT4G25390	396.254	~genotype	Wald	EV v Col-0	0.620984	0.53461	IHW	1	ashr	0.0135718	0.0695297
DAS30	AT4G25480	215.224	~genotype	Wald	EV v Col-0	0.0642576	0.948765	IHW	1	ashr	0.00108278	0.0720616
DAS30	AT4G25810	160.875	~genotype	Wald	EV v Col-0	0.205014	0.837561	IHW	1	ashr	0.00246127	0.075055
DAS30	AT4G25940	1876.94	~genotype	Wald	EV v Col-0	-0.24222	0.80861	IHW	1	ashr	-0.00665299	0.0639681
DAS30	AT4G25990	364.959	~genotype	Wald	EV v Col-0	0.048646	0.961201	IHW	1	ashr	0.00109486	0.0680832
DAS30	AT4G26090	969.888	~genotype	Wald	EV v Col-0	0.575462	0.564979	IHW	0.945855	ashr	0.0179322	0.0599646
DAS30	AT4G26120	159.746	~genotype	Wald	EV v Col-0	-0.0611796	0.951216	IHW	1	ashr	-0.00104854	0.0718717
DAS30	AT4G26270	1061.64	~genotype	Wald	EV v Col-0	-0.194321	0.845925	IHW	1	ashr	-0.00389761	0.0699626
DAS30	AT4G26555	1293.3	~genotype	Wald	EV v Col-0	0.687166	0.491978	IHW	0.912062	ashr	0.019413	0.0639464
DAS30	AT4G27030	698.534	~genotype	Wald	EV v Col-0	-1.04307	0.296917	IHW	0.872783	ashr	-0.023645	0.0709289
DAS30	AT4G27280	855.064	~genotype	Wald	EV v Col-0	-1.40361	0.160434	IHW	0.666792	ashr	-0.0275487	0.0765154
DAS30	AT4G27370	305.893	~genotype	Wald	EV v Col-0	0.852762	0.393791	IHW	0.982387	ashr	0.0202471	0.0689179
DAS30	AT4G27430	4158.82	~genotype	Wald	EV v Col-0	0.592938	0.553223	IHW	0.940838	ashr	0.017753	0.061713
DAS30	AT4G27440	51703.4	~genotype	Wald	EV v Col-0	-0.847579	0.396673	IHW	0.850214	ashr	-0.0216474	0.0672653
DAS30	AT4G27470	957.731	~genotype	Wald	EV v Col-0	-1.88032	0.0600641	IHW	0.500909	ashr	-0.0492046	0.0784334
DAS30	AT4G27480	155.143	~genotype	Wald	EV v Col-0	0.709612	0.477945	IHW	1	ashr	0.0173533	0.0677062
DAS30	AT4G27585	1162.09	~genotype	Wald	EV v Col-0	-0.288335	0.773091	IHW	0.995141	ashr	-0.00567919	0.0703316
DAS30	AT4G27652	112.426	~genotype	Wald	EV v Col-0	-0.057575	0.954087	IHW	1	ashr	-0.00115021	0.069934
DAS30	AT4G27760	1278.43	~genotype	Wald	EV v Col-0	0.113834	0.909369	IHW	1	ashr	0.00377192	0.0556896
DAS30	AT4G28050	783.284	~genotype	Wald	EV v Col-0	-0.163211	0.870352	IHW	1	ashr	-0.00440089	0.064395
DAS30	AT4G28080	26207.7	~genotype	Wald	EV v Col-0	-0.0621034	0.950481	IHW	1	ashr	-0.0014557	0.0673666
DAS30	AT4G28180	300.784	~genotype	Wald	EV v Col-0	-0.339916	0.73392	IHW	1	ashr	-0.00787019	0.0678452
DAS30	AT4G28240	1337.8	~genotype	Wald	EV v Col-0	0.748872	0.453934	IHW	0.894687	ashr	0.0164379	0.0699326
DAS30	AT4G28390	945.681	~genotype	Wald	EV v Col-0	0.561859	0.574212	IHW	0.951154	ashr	0.00985343	0.0724159
DAS30	AT4G28400	1487.42	~genotype	Wald	EV v Col-0	1.41856	0.156028	IHW	0.675274	ashr	0.0329511	0.0738453
DAS30	AT4G28570	1194.51	~genotype	Wald	EV v Col-0	0.247076	0.80485	IHW	1	ashr	0.00816758	0.0559544
DAS30	AT4G28660	6631.18	~genotype	Wald	EV v Col-0	-1.54687	0.121896	IHW	0.627834	ashr	-0.0400703	0.0726473
DAS30	AT4G28730	840.699	~genotype	Wald	EV v Col-0	-1.50121	0.133302	IHW	0.631839	ashr	-0.0425925	0.0688087
DAS30	AT4G28780	2228.18	~genotype	Wald	EV v Col-0	-3.87605	0.000106164	IHW	0.0243545	ashr	-0.219179	0.13732
DAS30	AT4G29190	3142.06	~genotype	Wald	EV v Col-0	0.377515	0.705791	IHW	1	ashr	0.00802721	0.0693512
DAS30	AT4G29210	1391.35	~genotype	Wald	EV v Col-0	-0.397721	0.690836	IHW	1	ashr	-0.0115816	0.0623822
DAS30	AT4G29310	1033.1	~genotype	Wald	EV v Col-0	-3.30491	0.000950066	IHW	0.0919909	ashr	-0.14699	0.119001
DAS30	AT4G29780	377.396	~genotype	Wald	EV v Col-0	0.811655	0.416989	IHW	1	ashr	0.0218557	0.0657544
DAS30	AT4G30100	3742.09	~genotype	Wald	EV v Col-0	0.629025	0.529333	IHW	0.948615	ashr	0.0188761	0.0617018
DAS30	AT4G30280	158.27	~genotype	Wald	EV v Col-0	2.60496	0.00918848	IHW	0.371966	ashr	0.0302768	0.0926861
DAS30	AT4G30410	152.787	~genotype	Wald	EV v Col-0	1.24116	0.214548	IHW	0.927378	ashr	0.0308319	0.0704375
DAS30	AT4G30490	1163.7	~genotype	Wald	EV v Col-0	0.297954	0.765738	IHW	1	ashr	0.00879159	0.0618108
DAS30	AT4G31130	1141.79	~genotype	Wald	EV v Col-0	-0.201309	0.840457	IHW	1	ashr	-0.00667661	0.0556462
DAS30	AT4G31250	271.369	~genotype	Wald	EV v Col-0	0.122982	0.902121	IHW	1	ashr	0.00364269	0.061556
DAS30	AT4G31270	201.836	~genotype	Wald	EV v Col-0	1.82682	0.0677271	IHW	0.673068	ashr	0.0547927	0.0708943
DAS30	AT4G31290	2340	~genotype	Wald	EV v Col-0	0.270391	0.78686	IHW	1	ashr	0.00604757	0.0683549
DAS30	AT4G31500	12391.5	~genotype	Wald	EV v Col-0	-0.806079	0.420197	IHW	0.625623	ashr	-0.0264839	0.0573079
DAS30	AT4G31590	1572.37	~genotype	Wald	EV v Col-0	-1.73785	0.082238	IHW	0.562818	ashr	-0.0599874	0.056809
DAS30	AT4G31850	2624.58	~genotype	Wald	EV v Col-0	0.115703	0.907888	IHW	1	ashr	0.00383311	0.0557068
DAS30	AT4G32020	9707.75	~genotype	Wald	EV v Col-0	-1.15391	0.248536	IHW	0.53427	ashr	-0.0364993	0.0610302
DAS30	AT4G32620	1740.26	~genotype	Wald	EV v Col-0	1.06313	0.287722	IHW	0.792846	ashr	0.0350978	0.0577459
DAS30	AT4G32710	626.067	~genotype	Wald	EV v Col-0	0.204341	0.838087	IHW	1	ashr	0.00546665	0.064623
DAS30	AT4G32760	3699.78	~genotype	Wald	EV v Col-0	-0.0137853	0.989001	IHW	1	ashr	-0.000467952	0.0529132
DAS30	AT4G32915	1400.39	~genotype	Wald	EV v Col-0	-2.26477	0.023527	IHW	0.376405	ashr	-0.0804016	0.0595494
DAS30	AT4G32940	9818.47	~genotype	Wald	EV v Col-0	-0.120736	0.9039	IHW	0.876909	ashr	-0.00267897	0.0683517
DAS30	AT4G33000	1237.51	~genotype	Wald	EV v Col-0	-0.971575	0.331262	IHW	0.824792	ashr	-0.0303311	0.0609498
DAS30	AT4G33050	3629.83	~genotype	Wald	EV v Col-0	0.37865	0.704948	IHW	1	ashr	0.00691619	0.071475
DAS30	AT4G33220	4686.68	~genotype	Wald	EV v Col-0	-0.981186	0.326501	IHW	0.80335	ashr	-0.0335941	0.0530409
DAS30	AT4G33360	1257.15	~genotype	Wald	EV v Col-0	-1.43909	0.150125	IHW	0.64308	ashr	-0.0474288	0.0598866
DAS30	AT4G33890	774.826	~genotype	Wald	EV v Col-0	-0.111957	0.910858	IHW	1	ashr	-0.00380811	0.0525836
DAS30	AT4G33920	1390.32	~genotype	Wald	EV v Col-0	-0.0326799	0.97393	IHW	1	ashr	-0.000965148	0.0616374
DAS30	AT4G33985	55.1456	~genotype	Wald	EV v Col-0	0.844309	0.398497	IHW	1	ashr	0.017562	0.0712597
DAS30	AT4G34090	1907.77	~genotype	Wald	EV v Col-0	-0.858183	0.390791	IHW	0.865684	ashr	-0.0270353	0.0600957
DAS30	AT4G34150	2765	~genotype	Wald	EV v Col-0	-1.7782	0.0753705	IHW	0.545119	ashr	-0.0471986	0.0756906
DAS30	AT4G34190	12067.6	~genotype	Wald	EV v Col-0	-0.437348	0.661859	IHW	0.807047	ashr	-0.0112844	0.0657938
DAS30	AT4G34220	3959.7	~genotype	Wald	EV v Col-0	-0.221514	0.824692	IHW	1	ashr	-0.00669173	0.0608696
DAS30	AT4G34390	1600.69	~genotype	Wald	EV v Col-0	0.262369	0.793037	IHW	1	ashr	0.00689771	0.0651026
DAS30	AT4G34620	19961	~genotype	Wald	EV v Col-0	-1.14425	0.252521	IHW	0.621387	ashr	-0.0343008	0.0636278
DAS30	AT4G34730	2674.44	~genotype	Wald	EV v Col-0	-0.690465	0.489902	IHW	0.927633	ashr	-0.0182538	0.0658242
DAS30	AT4G34750	633.513	~genotype	Wald	EV v Col-0	-1.69064	0.090906	IHW	0.670554	ashr	-0.0455018	0.0735534
DAS30	AT4G34760	919.861	~genotype	Wald	EV v Col-0	-1.43533	0.151194	IHW	0.657578	ashr	-0.0424082	0.0663831
DAS30	AT4G34881	2497.07	~genotype	Wald	EV v Col-0	-0.261508	0.793701	IHW	1	ashr	-0.00592818	0.0681119
DAS30	AT4G35100	14830.8	~genotype	Wald	EV v Col-0	-1.17558	0.239764	IHW	0.531301	ashr	-0.034872	0.0642521
DAS30	AT4G35190	23.8928	~genotype	Wald	EV v Col-0	2.23204	0.0256125	IHW	1	ashr	0.037512	0.0904506
DAS30	AT4G35260	3370.24	~genotype	Wald	EV v Col-0	-2.65129	0.0080186	IHW	0.241992	ashr	-0.0960897	0.055213
DAS30	AT4G35310	5214.17	~genotype	Wald	EV v Col-0	0.240711	0.809779	IHW	0.855144	ashr	0.00681686	0.0630947
DAS30	AT4G35600	1039.49	~genotype	Wald	EV v Col-0	0.198571	0.842599	IHW	1	ashr	0.00549375	0.0637345
DAS30	AT4G35730	461.748	~genotype	Wald	EV v Col-0	-0.318726	0.749935	IHW	1	ashr	-0.00804343	0.0661026
DAS30	AT4G35920	1762.1	~genotype	Wald	EV v Col-0	-0.560033	0.575457	IHW	0.956557	ashr	-0.0184261	0.0566867
DAS30	AT4G35950	1300.88	~genotype	Wald	EV v Col-0	0.214244	0.830357	IHW	1	ashr	0.00709582	0.0557727
DAS30	AT4G36010	392.341	~genotype	Wald	EV v Col-0	-0.458361	0.646693	IHW	1	ashr	-0.00909958	0.0705482
DAS30	AT4G36030	988.694	~genotype	Wald	EV v Col-0	0.375937	0.706963	IHW	1	ashr	0.0129054	0.0486919
DAS30	AT4G36040	9505.25	~genotype	Wald	EV v Col-0	1.8548	0.0636246	IHW	0.341289	ashr	0.0434198	0.0809321
DAS30	AT4G36220	5965.13	~genotype	Wald	EV v Col-0	-2.10597	0.0352067	IHW	0.270179	ashr	-0.0653759	0.075304
DAS30	AT4G36230	147.759	~genotype	Wald	EV v Col-0	-0.304611	0.760663	IHW	1	ashr	-0.00714845	0.0675445
DAS30	AT4G36650	453.769	~genotype	Wald	EV v Col-0	0.828369	0.407461	IHW	0.967835	ashr	0.0234144	0.0643784
DAS30	AT4G36790	715.556	~genotype	Wald	EV v Col-0	-1.1677	0.242927	IHW	0.82647	ashr	-0.0366212	0.0615757
DAS30	AT4G36850	2039.36	~genotype	Wald	EV v Col-0	2.16828	0.0301376	IHW	0.507113	ashr	0.0487244	0.0898063
DAS30	AT4G37110	684.145	~genotype	Wald	EV v Col-0	0.54881	0.583136	IHW	1	ashr	0.0158796	0.0628488
DAS30	AT4G37120	3390.14	~genotype	Wald	EV v Col-0	2.08363	0.0371936	IHW	0.44862	ashr	0.0735709	0.0528058
DAS30	AT4G37220	13.3656	~genotype	Wald	EV v Col-0	0.450467	0.652374	IHW	1	ashr	0.00485038	0.0759653
DAS30	AT4G37260	1755.78	~genotype	Wald	EV v Col-0	0.104936	0.916427	IHW	1	ashr	0.00262453	0.066106
DAS30	AT4G37280	940.346	~genotype	Wald	EV v Col-0	1.14962	0.2503	IHW	0.745876	ashr	0.037905	0.0582099
DAS30	AT4G37370	489.3	~genotype	Wald	EV v Col-0	-1.55814	0.119201	IHW	0.689293	ashr	-0.0312839	0.0781595
DAS30	AT4G37550	2737.38	~genotype	Wald	EV v Col-0	-0.218345	0.82716	IHW	1	ashr	-0.00744571	0.0521394
DAS30	AT4G37610	400.505	~genotype	Wald	EV v Col-0	2.37233	0.0176762	IHW	0.402204	ashr	0.03642	0.09216
DAS30	AT4G37800	2845.88	~genotype	Wald	EV v Col-0	-1.57028	0.116351	IHW	0.603675	ashr	-0.0358133	0.0762629
DAS30	AT4G38430	2599.97	~genotype	Wald	EV v Col-0	-0.749882	0.453326	IHW	0.894187	ashr	-0.0249712	0.0560393
DAS30	AT4G38440	870.782	~genotype	Wald	EV v Col-0	0.489455	0.62452	IHW	0.953613	ashr	0.0125154	0.0661049
DAS30	AT4G38495	333.757	~genotype	Wald	EV v Col-0	0.139858	0.888773	IHW	1	ashr	0.0038505	0.0638329
DAS30	AT4G38540	524.568	~genotype	Wald	EV v Col-0	1.23148	0.218144	IHW	0.824284	ashr	0.0331632	0.0680971
DAS30	AT4G38550	8393.73	~genotype	Wald	EV v Col-0	-0.11226	0.910618	IHW	0.769671	ashr	-0.00284972	0.0657908
DAS30	AT4G38860	2461.73	~genotype	Wald	EV v Col-0	-0.194747	0.845591	IHW	1	ashr	-0.00571008	0.0619481
DAS30	AT4G38950	2648.8	~genotype	Wald	EV v Col-0	0.479877	0.631315	IHW	0.993955	ashr	0.0141026	0.0621906
DAS30	AT4G39040	3510.61	~genotype	Wald	EV v Col-0	0.0526457	0.958014	IHW	1	ashr	0.00147731	0.0632686
DAS30	AT4G39050	2001.06	~genotype	Wald	EV v Col-0	2.04982	0.040382	IHW	0.549067	ashr	0.0672695	0.0684988
DAS30	AT4G39090	23338.2	~genotype	Wald	EV v Col-0	0.224041	0.822725	IHW	0.873159	ashr	0.00526558	0.0674203
DAS30	AT4G39140	1034.49	~genotype	Wald	EV v Col-0	-0.405372	0.685204	IHW	0.995141	ashr	-0.0122507	0.0610353
DAS30	AT4G39270	758.824	~genotype	Wald	EV v Col-0	0.642295	0.520682	IHW	0.908951	ashr	0.0212141	0.0565257
DAS30	AT4G39580	81.4502	~genotype	Wald	EV v Col-0	0.356449	0.721504	IHW	1	ashr	0.00784923	0.0687464
DAS30	AT4G39620	1036.85	~genotype	Wald	EV v Col-0	0.919788	0.357684	IHW	0.843371	ashr	0.0303284	0.0573477
DAS30	AT4G39670	127.639	~genotype	Wald	EV v Col-0	-0.0799152	0.936305	IHW	1	ashr	-0.00120723	0.0731787
DAS30	AT4G39830	433.715	~genotype	Wald	EV v Col-0	0.471411	0.637347	IHW	1	ashr	0.00950599	0.0703565
DAS30	AT4G39890	235.291	~genotype	Wald	EV v Col-0	0.433994	0.664293	IHW	1	ashr	0.0090677	0.0697395
DAS30	AT4G39900	1043.25	~genotype	Wald	EV v Col-0	0.130636	0.896064	IHW	1	ashr	0.00352385	0.0643674
DAS30	AT4G40080	83.7513	~genotype	Wald	EV v Col-0	-1.41949	0.155757	IHW	1	ashr	-0.0323237	0.074277
DAS30	AT5G01015	560.051	~genotype	Wald	EV v Col-0	-1.3586	0.174274	IHW	0.755912	ashr	-0.0327512	0.0723157
DAS30	AT5G01100	283.176	~genotype	Wald	EV v Col-0	0.5231	0.600905	IHW	1	ashr	0.00997052	0.0712737
DAS30	AT5G01590	7137.81	~genotype	Wald	EV v Col-0	-1.66188	0.0965362	IHW	0.470003	ashr	-0.0565056	0.0584547
DAS30	AT5G01630	412.323	~genotype	Wald	EV v Col-0	1.56283	0.118093	IHW	0.733499	ashr	0.0437262	0.0701268
DAS30	AT5G02040	747.484	~genotype	Wald	EV v Col-0	0.213695	0.830785	IHW	1	ashr	0.00685355	0.0580227
DAS30	AT5G02100	518.414	~genotype	Wald	EV v Col-0	1.38592	0.16577	IHW	0.744836	ashr	0.0417481	0.0650472
DAS30	AT5G02160	19771	~genotype	Wald	EV v Col-0	0.26918	0.787791	IHW	1	ashr	0.00491719	0.0712914
DAS30	AT5G02290	2352.26	~genotype	Wald	EV v Col-0	0.38833	0.697772	IHW	1	ashr	0.00879859	0.0683159
DAS30	AT5G02450	6268.6	~genotype	Wald	EV v Col-0	-0.982344	0.32593	IHW	0.823459	ashr	-0.0288162	0.0637034
DAS30	AT5G02540	378.264	~genotype	Wald	EV v Col-0	-1.51221	0.13048	IHW	0.81982	ashr	-0.0329064	0.0763275
DAS30	AT5G02710	1435.13	~genotype	Wald	EV v Col-0	-0.618163	0.536468	IHW	1	ashr	-0.0203248	0.0568402
DAS30	AT5G02890	1296.92	~genotype	Wald	EV v Col-0	-3.50768	0.000452029	IHW	0.0578386	ashr	-0.176314	0.144471
DAS30	AT5G03210	45.7994	~genotype	Wald	EV v Col-0	-0.622275	0.533761	IHW	1	ashr	-0.00842766	0.0749681
DAS30	AT5G03320	1045.42	~genotype	Wald	EV v Col-0	0.84502	0.3981	IHW	0.853929	ashr	0.0222405	0.066499
DAS30	AT5G03330	696.236	~genotype	Wald	EV v Col-0	1.66474	0.0959637	IHW	0.650207	ashr	0.0457493	0.07232
DAS30	AT5G03355	199.871	~genotype	Wald	EV v Col-0	-1.13532	0.25624	IHW	1	ashr	-0.0226812	0.0737301
DAS30	AT5G03540	2793.38	~genotype	Wald	EV v Col-0	0.507196	0.612018	IHW	1	ashr	0.0150318	0.0619339
DAS30	AT5G03630	3420.56	~genotype	Wald	EV v Col-0	-0.489783	0.624288	IHW	0.973284	ashr	-0.0122123	0.0666637
DAS30	AT5G03670	273.105	~genotype	Wald	EV v Col-0	-0.685	0.493344	IHW	0.997123	ashr	-0.0196128	0.0635137
DAS30	AT5G03940	8096.89	~genotype	Wald	EV v Col-0	0.022355	0.982165	IHW	1	ashr	0.000619092	0.0636379
DAS30	AT5G03990	331.205	~genotype	Wald	EV v Col-0	-0.164733	0.869155	IHW	1	ashr	-0.0052446	0.0584136
DAS30	AT5G04040	2473.82	~genotype	Wald	EV v Col-0	1.08416	0.278296	IHW	0.787452	ashr	0.0340494	0.0610978
DAS30	AT5G04090	1038.53	~genotype	Wald	EV v Col-0	0.660516	0.508923	IHW	0.904665	ashr	0.0213381	0.0581498
DAS30	AT5G04320	649.619	~genotype	Wald	EV v Col-0	2.48996	0.0127756	IHW	0.374604	ashr	0.0850803	0.0807512
DAS30	AT5G04340	317.598	~genotype	Wald	EV v Col-0	1.42724	0.153512	IHW	0.762762	ashr	0.0255613	0.0777423
DAS30	AT5G04550	3079.36	~genotype	Wald	EV v Col-0	1.20777	0.227135	IHW	0.744053	ashr	0.0386144	0.0389796
DAS30	AT5G04720	2485.23	~genotype	Wald	EV v Col-0	1.14575	0.2519	IHW	0.9114	ashr	0.030588	0.067732
DAS30	AT5G04760	487.009	~genotype	Wald	EV v Col-0	-0.089368	0.928789	IHW	1	ashr	-0.0027064	0.0607089
DAS30	AT5G04890	271.456	~genotype	Wald	EV v Col-0	0.347897	0.727918	IHW	1	ashr	0.00827822	0.0673463
DAS30	AT5G04930	4827.26	~genotype	Wald	EV v Col-0	0.0669845	0.946594	IHW	1	ashr	0.0017979	0.0644704
DAS30	AT5G04980	271.756	~genotype	Wald	EV v Col-0	1.68949	0.0911253	IHW	0.655506	ashr	0.0542061	0.0643335
DAS30	AT5G05110	874.567	~genotype	Wald	EV v Col-0	0.500529	0.616703	IHW	0.935036	ashr	0.0127134	0.06628
DAS30	AT5G05190	518.488	~genotype	Wald	EV v Col-0	-1.33747	0.181071	IHW	0.799745	ashr	-0.0441076	0.0591677
DAS30	AT5G05300	60.3398	~genotype	Wald	EV v Col-0	-0.357414	0.720782	IHW	1	ashr	-0.0047954	0.0744574
DAS30	AT5G05410	123.489	~genotype	Wald	EV v Col-0	1.9684	0.0490221	IHW	0.625623	ashr	0.0435148	0.0845495
DAS30	AT5G05440	455.824	~genotype	Wald	EV v Col-0	0.906648	0.364593	IHW	0.991109	ashr	0.0187817	0.0716545
DAS30	AT5G05740	3723.94	~genotype	Wald	EV v Col-0	-1.39743	0.162284	IHW	0.670387	ashr	-0.0434556	0.0635017
DAS30	AT5G05890	125.91	~genotype	Wald	EV v Col-0	0.379802	0.704092	IHW	1	ashr	0.00852779	0.0684579
DAS30	AT5G05930	1067.17	~genotype	Wald	EV v Col-0	0.485087	0.627615	IHW	0.973167	ashr	0.014304	0.0620793
DAS30	AT5G05940	247.054	~genotype	Wald	EV v Col-0	-0.347465	0.728242	IHW	1	ashr	-0.00983512	0.0632204
DAS30	AT5G06230	60.5627	~genotype	Wald	EV v Col-0	-0.384225	0.700811	IHW	1	ashr	-0.00490162	0.0748632
DAS30	AT5G06290	9778.94	~genotype	Wald	EV v Col-0	-2.76736	0.00565118	IHW	0.11949	ashr	-0.10236	0.0617401
DAS30	AT5G06320	5318.12	~genotype	Wald	EV v Col-0	-1.05915	0.289533	IHW	0.776139	ashr	-0.0205837	0.0735476
DAS30	AT5G06510	91.0349	~genotype	Wald	EV v Col-0	-1.23658	0.216245	IHW	0.928823	ashr	-0.028519	0.0721008
DAS30	AT5G06960	519.856	~genotype	Wald	EV v Col-0	0.456395	0.648106	IHW	1	ashr	0.0127117	0.0638566
DAS30	AT5G06970	2899.16	~genotype	Wald	EV v Col-0	0.706048	0.480158	IHW	0.910308	ashr	0.0237068	0.055108
DAS30	AT5G07100	370.366	~genotype	Wald	EV v Col-0	1.25765	0.208517	IHW	0.832981	ashr	0.0309481	0.0708193
DAS30	AT5G07470	2502.34	~genotype	Wald	EV v Col-0	-0.905148	0.365387	IHW	0.853929	ashr	-0.0293273	0.05858
DAS30	AT5G07590	565.176	~genotype	Wald	EV v Col-0	-0.454166	0.64971	IHW	1	ashr	-0.0134965	0.0617484
DAS30	AT5G07920	1018.88	~genotype	Wald	EV v Col-0	0.28719	0.773967	IHW	1	ashr	0.00905351	0.0590151
DAS30	AT5G08050	6915.21	~genotype	Wald	EV v Col-0	-0.474355	0.635247	IHW	0.796544	ashr	-0.0129548	0.0644386
DAS30	AT5G08240	332.101	~genotype	Wald	EV v Col-0	0.624227	0.532479	IHW	1	ashr	0.00899633	0.0745056
DAS30	AT5G08280	17536.2	~genotype	Wald	EV v Col-0	-3.20221	0.0013638	IHW	0.107296	ashr	-0.123517	0.0651622
DAS30	AT5G08330	3697.84	~genotype	Wald	EV v Col-0	-1.00434	0.315213	IHW	0.815398	ashr	-0.0307806	0.0619721
DAS30	AT5G08790	1364.01	~genotype	Wald	EV v Col-0	1.14564	0.251944	IHW	0.777025	ashr	0.0313873	0.0669406
DAS30	AT5G09470	35.0578	~genotype	Wald	EV v Col-0	-2.83921	0.0045225	IHW	0.357452	ashr	-0.0472558	0.10571
DAS30	AT5G09650	10246.1	~genotype	Wald	EV v Col-0	-1.78306	0.0745759	IHW	0.446038	ashr	-0.0545149	0.0689498
DAS30	AT5G09760	981.303	~genotype	Wald	EV v Col-0	-1.2345	0.217017	IHW	0.706013	ashr	-0.034239	0.067164
DAS30	AT5G09995	774.244	~genotype	Wald	EV v Col-0	-2.33084	0.019762	IHW	0.353386	ashr	-0.0801669	0.0706833
DAS30	AT5G10150	709.397	~genotype	Wald	EV v Col-0	0.330931	0.740697	IHW	1	ashr	0.00935783	0.0632303
DAS30	AT5G10160	1296.76	~genotype	Wald	EV v Col-0	-0.256631	0.797464	IHW	1	ashr	-0.00792357	0.0599821
DAS30	AT5G10200	652.164	~genotype	Wald	EV v Col-0	1.24264	0.214002	IHW	0.799999	ashr	0.0370483	0.0644573
DAS30	AT5G10460	985.025	~genotype	Wald	EV v Col-0	0.846876	0.397064	IHW	0.838525	ashr	0.0291243	0.0510923
DAS30	AT5G10540	4311.53	~genotype	Wald	EV v Col-0	-0.729242	0.465853	IHW	0.915211	ashr	-0.024166	0.0564272
DAS30	AT5G10620	268.283	~genotype	Wald	EV v Col-0	-0.0912439	0.927299	IHW	1	ashr	-0.0023324	0.0656293
DAS30	AT5G10625	38.8939	~genotype	Wald	EV v Col-0	-1.40693	0.159449	IHW	0.824284	ashr	-0.019086	0.0789382
DAS30	AT5G10690	2129.81	~genotype	Wald	EV v Col-0	-1.43259	0.151975	IHW	0.670554	ashr	-0.0488616	0.0561208
DAS30	AT5G10695	325.837	~genotype	Wald	EV v Col-0	0.553457	0.579951	IHW	1	ashr	0.00846541	0.073793
DAS30	AT5G10750	627.701	~genotype	Wald	EV v Col-0	-0.3033	0.761661	IHW	1	ashr	-0.00999173	0.0562752
DAS30	AT5G10780	3010.99	~genotype	Wald	EV v Col-0	-0.982431	0.325888	IHW	0.823459	ashr	-0.0326975	0.0567487
DAS30	AT5G10900	263.801	~genotype	Wald	EV v Col-0	-0.650652	0.515271	IHW	1	ashr	-0.019803	0.061175
DAS30	AT5G10960	4281.71	~genotype	Wald	EV v Col-0	-0.30806	0.758036	IHW	1	ashr	-0.0102942	0.0550176
DAS30	AT5G11000	1175.66	~genotype	Wald	EV v Col-0	-1.58884	0.112098	IHW	0.595656	ashr	-0.0475805	0.0673701
DAS30	AT5G11310	185.898	~genotype	Wald	EV v Col-0	-0.417038	0.676651	IHW	1	ashr	-0.0092067	0.0688188
DAS30	AT5G11450	5166.49	~genotype	Wald	EV v Col-0	-0.890334	0.373286	IHW	0.85446	ashr	-0.027791	0.0606715
DAS30	AT5G11480	3494.4	~genotype	Wald	EV v Col-0	-0.882933	0.377273	IHW	0.837859	ashr	-0.0273233	0.0610684
DAS30	AT5G11670	10587.2	~genotype	Wald	EV v Col-0	1.50875	0.131362	IHW	0.635537	ashr	0.0440599	0.0676582
DAS30	AT5G11730	673.986	~genotype	Wald	EV v Col-0	-1.06525	0.286762	IHW	0.882495	ashr	-0.0337717	0.0604951
DAS30	AT5G12880	15.1288	~genotype	Wald	EV v Col-0	-0.0292309	0.97668	IHW	1	ashr	-0.000394931	0.0741275
DAS30	AT5G12890	1215.25	~genotype	Wald	EV v Col-0	-1.20802	0.22704	IHW	0.715436	ashr	-0.0366506	0.0634567
DAS30	AT5G12940	814.309	~genotype	Wald	EV v Col-0	-0.257755	0.796596	IHW	1	ashr	-0.00512412	0.0701602
DAS30	AT5G13080	136.208	~genotype	Wald	EV v Col-0	-0.440918	0.659272	IHW	1	ashr	-0.00506924	0.0756035
DAS30	AT5G13120	5285.15	~genotype	Wald	EV v Col-0	-2.80432	0.00504229	IHW	0.114924	ashr	-0.104785	0.0811363
DAS30	AT5G13140	2266.94	~genotype	Wald	EV v Col-0	-0.983993	0.325119	IHW	0.823459	ashr	-0.0288443	0.0637371
DAS30	AT5G13180	3354.5	~genotype	Wald	EV v Col-0	0.440708	0.659424	IHW	0.990732	ashr	0.0131591	0.0615508
DAS30	AT5G13190	1406.07	~genotype	Wald	EV v Col-0	-0.339595	0.734162	IHW	1	ashr	-0.00809455	0.0673004
DAS30	AT5G13200	688.238	~genotype	Wald	EV v Col-0	0.0980148	0.921921	IHW	1	ashr	0.00188222	0.070491
DAS30	AT5G13260	1673.86	~genotype	Wald	EV v Col-0	0.431933	0.66579	IHW	1	ashr	0.0143638	0.0556093
DAS30	AT5G13390	2334.1	~genotype	Wald	EV v Col-0	-0.59699	0.550514	IHW	0.959554	ashr	-0.0173005	0.0628982
DAS30	AT5G13460	600.038	~genotype	Wald	EV v Col-0	1.23301	0.217571	IHW	0.804338	ashr	0.0386678	0.0619333
DAS30	AT5G13510	10362.7	~genotype	Wald	EV v Col-0	-2.95582	0.00311837	IHW	0.117855	ashr	-0.114569	0.0932464
DAS30	AT5G13630	116589	~genotype	Wald	EV v Col-0	-0.620779	0.534745	IHW	0.929859	ashr	-0.0192346	0.0603206
DAS30	AT5G13710	4228.17	~genotype	Wald	EV v Col-0	-0.201988	0.839926	IHW	1	ashr	-0.00662295	0.056565
DAS30	AT5G13730	1210.9	~genotype	Wald	EV v Col-0	0.756198	0.449531	IHW	0.890165	ashr	0.0236598	0.0601626
DAS30	AT5G13770	4218.36	~genotype	Wald	EV v Col-0	0.147794	0.882505	IHW	1	ashr	0.00460428	0.0595077
DAS30	AT5G13800	2937.62	~genotype	Wald	EV v Col-0	-0.756842	0.449144	IHW	0.891414	ashr	-0.0183286	0.0680901
DAS30	AT5G13820	233.04	~genotype	Wald	EV v Col-0	-0.369599	0.711681	IHW	1	ashr	-0.00848048	0.068058
DAS30	AT5G13980	4841.36	~genotype	Wald	EV v Col-0	0.969475	0.332308	IHW	0.67185	ashr	0.0334041	0.0488935
DAS30	AT5G14320	14967.5	~genotype	Wald	EV v Col-0	-2.26755	0.0233564	IHW	0.278408	ashr	-0.0786699	0.0664699
DAS30	AT5G14460	2596.44	~genotype	Wald	EV v Col-0	-0.201099	0.840621	IHW	1	ashr	-0.00690181	0.0489956
DAS30	AT5G14540	1950.04	~genotype	Wald	EV v Col-0	-2.04312	0.0410402	IHW	0.459406	ashr	-0.0675757	0.0674776
DAS30	AT5G14610	1203.8	~genotype	Wald	EV v Col-0	-0.432838	0.665133	IHW	0.957502	ashr	-0.0138473	0.0583682
DAS30	AT5G14700	406.249	~genotype	Wald	EV v Col-0	-0.0997634	0.920532	IHW	1	ashr	-0.00254171	0.065706
DAS30	AT5G14790	856.291	~genotype	Wald	EV v Col-0	-1.87768	0.0604248	IHW	0.501704	ashr	-0.0651234	0.0576651
DAS30	AT5G14910	7122.03	~genotype	Wald	EV v Col-0	-1.59112	0.111583	IHW	0.609703	ashr	-0.0550741	0.0545558
DAS30	AT5G14930	928.151	~genotype	Wald	EV v Col-0	0.635562	0.525062	IHW	0.897703	ashr	0.0149535	0.068242
DAS30	AT5G15190	97.7066	~genotype	Wald	EV v Col-0	0.837641	0.402232	IHW	1	ashr	0.0174823	0.071173
DAS30	AT5G15260	479.028	~genotype	Wald	EV v Col-0	-0.644325	0.519365	IHW	1	ashr	-0.018529	0.0632653
DAS30	AT5G15500	111.109	~genotype	Wald	EV v Col-0	-1.6813	0.0927039	IHW	0.741589	ashr	-0.0210588	0.081212
DAS30	AT5G15780	2495.68	~genotype	Wald	EV v Col-0	-1.53988	0.12359	IHW	0.630662	ashr	-0.0339201	0.0764934
DAS30	AT5G15870	949.89	~genotype	Wald	EV v Col-0	-0.722321	0.470097	IHW	0.886511	ashr	-0.0184698	0.0667489
DAS30	AT5G16030	6925.52	~genotype	Wald	EV v Col-0	0.707665	0.479153	IHW	0.74922	ashr	0.0174724	0.0674926
DAS30	AT5G16120	1636.76	~genotype	Wald	EV v Col-0	0.694066	0.487641	IHW	0.913951	ashr	0.0190605	0.0648089
DAS30	AT5G16140	508.476	~genotype	Wald	EV v Col-0	0.234855	0.814321	IHW	1	ashr	0.00589829	0.0661096
DAS30	AT5G16370	1437.49	~genotype	Wald	EV v Col-0	1.03062	0.302717	IHW	0.807497	ashr	0.0293144	0.0650408
DAS30	AT5G16390	3793.91	~genotype	Wald	EV v Col-0	-1.86744	0.0618402	IHW	0.626436	ashr	-0.0566192	0.0710186
DAS30	AT5G16440	1568.21	~genotype	Wald	EV v Col-0	-1.11804	0.26355	IHW	0.773278	ashr	-0.0376337	0.0561157
DAS30	AT5G16590	1454.54	~genotype	Wald	EV v Col-0	-1.87002	0.0614809	IHW	0.625623	ashr	-0.0637127	0.0606543
DAS30	AT5G16715	3382.94	~genotype	Wald	EV v Col-0	-0.714795	0.474736	IHW	0.919669	ashr	-0.0198795	0.0645029
DAS30	AT5G16870	333.8	~genotype	Wald	EV v Col-0	-1.19496	0.232105	IHW	0.88163	ashr	-0.0337663	0.0662364
DAS30	AT5G17230	12978.6	~genotype	Wald	EV v Col-0	0.44694	0.654918	IHW	0.966258	ashr	0.0141198	0.0590762
DAS30	AT5G17310	1720.46	~genotype	Wald	EV v Col-0	-0.661025	0.508596	IHW	1	ashr	-0.0205179	0.0603227
DAS30	AT5G17400	442.542	~genotype	Wald	EV v Col-0	0.154363	0.877323	IHW	1	ashr	0.0043914	0.0628987
DAS30	AT5G17860	511.933	~genotype	Wald	EV v Col-0	0.127704	0.898383	IHW	1	ashr	0.00266986	0.0693015
DAS30	AT5G17870	8487.47	~genotype	Wald	EV v Col-0	-2.31971	0.0203566	IHW	0.21857	ashr	-0.0746449	0.0800866
DAS30	AT5G18065	146.738	~genotype	Wald	EV v Col-0	-0.164539	0.869307	IHW	1	ashr	-0.00433811	0.0649527
DAS30	AT5G18130	1563.66	~genotype	Wald	EV v Col-0	-0.111253	0.911416	IHW	1	ashr	-0.00224931	0.0697859
DAS30	AT5G18270	126.158	~genotype	Wald	EV v Col-0	-1.46789	0.142133	IHW	1	ashr	-0.0252613	0.0784917
DAS30	AT5G18310	1338.88	~genotype	Wald	EV v Col-0	0.832383	0.405193	IHW	0.872617	ashr	0.0229562	0.0651503
DAS30	AT5G18410	2467.32	~genotype	Wald	EV v Col-0	0.15322	0.878225	IHW	1	ashr	0.00517202	0.0537672
DAS30	AT5G18460	939.809	~genotype	Wald	EV v Col-0	-0.461149	0.644692	IHW	0.963703	ashr	-0.0154861	0.0546633
DAS30	AT5G18470	1037.49	~genotype	Wald	EV v Col-0	1.11926	0.26303	IHW	0.773278	ashr	0.0250622	0.0717113
DAS30	AT5G18490	821.715	~genotype	Wald	EV v Col-0	0.450166	0.652591	IHW	0.967295	ashr	0.0103369	0.068202
DAS30	AT5G18660	5018.96	~genotype	Wald	EV v Col-0	-1.55059	0.120999	IHW	0.626946	ashr	-0.0433348	0.070014
DAS30	AT5G18970	398.487	~genotype	Wald	EV v Col-0	-3.02069	0.00252203	IHW	0.231804	ashr	-0.119535	0.100379
DAS30	AT5G19240	3205.16	~genotype	Wald	EV v Col-0	-1.57167	0.116028	IHW	0.741589	ashr	-0.0363571	0.0759846
DAS30	AT5G19760	10720.8	~genotype	Wald	EV v Col-0	-2.33262	0.0196679	IHW	0.341289	ashr	-0.083163	0.0604207
DAS30	AT5G19900	1455.01	~genotype	Wald	EV v Col-0	1.87035	0.0614351	IHW	0.514124	ashr	0.0640247	0.0599603
DAS30	AT5G20060	1917.92	~genotype	Wald	EV v Col-0	-1.811	0.0701411	IHW	0.545119	ashr	-0.0603008	0.0626169
DAS30	AT5G20500	2425.38	~genotype	Wald	EV v Col-0	0.619052	0.535882	IHW	0.935517	ashr	0.0201033	0.0577292
DAS30	AT5G21222	2483.13	~genotype	Wald	EV v Col-0	1.40635	0.159619	IHW	0.654659	ashr	0.0487726	0.051356
DAS30	AT5G21920	4480.34	~genotype	Wald	EV v Col-0	-2.68293	0.00729802	IHW	0.309019	ashr	-0.0986032	0.0705049
DAS30	AT5G21930	4831.43	~genotype	Wald	EV v Col-0	-0.806336	0.420049	IHW	0.710728	ashr	-0.0275691	0.052701
DAS30	AT5G21940	2707.01	~genotype	Wald	EV v Col-0	3.10269	0.00191768	IHW	0.130177	ashr	0.0900537	0.137799
DAS30	AT5G22060	3216.77	~genotype	Wald	EV v Col-0	-0.274512	0.783691	IHW	1	ashr	-0.00897725	0.0568042
DAS30	AT5G22270	329.005	~genotype	Wald	EV v Col-0	0.86945	0.384601	IHW	0.975623	ashr	0.0187537	0.0707958
DAS30	AT5G22300	699.56	~genotype	Wald	EV v Col-0	1.65145	0.0986474	IHW	0.64086	ashr	0.0368237	0.0779796
DAS30	AT5G22340	2540.01	~genotype	Wald	EV v Col-0	-1.57811	0.11454	IHW	0.617639	ashr	-0.0547862	0.0534235
DAS30	AT5G22350	1303.41	~genotype	Wald	EV v Col-0	-1.49335	0.135346	IHW	0.639448	ashr	-0.0515002	0.0545534
DAS30	AT5G22380	160.701	~genotype	Wald	EV v Col-0	0.482174	0.629682	IHW	1	ashr	0.00678032	0.0743295
DAS30	AT5G22450	2398	~genotype	Wald	EV v Col-0	2.7026	0.00687985	IHW	0.233407	ashr	0.0996343	0.0640932
DAS30	AT5G22520	127.734	~genotype	Wald	EV v Col-0	0.323838	0.746061	IHW	1	ashr	0.0037107	0.0754576
DAS30	AT5G22540	76.9799	~genotype	Wald	EV v Col-0	0.510798	0.609493	IHW	1	ashr	0.00701424	0.0745791
DAS30	AT5G22640	7858.53	~genotype	Wald	EV v Col-0	-0.621608	0.534199	IHW	0.76013	ashr	-0.0200502	0.0581713
DAS30	AT5G22800	5684.89	~genotype	Wald	EV v Col-0	-1.15124	0.249633	IHW	0.630967	ashr	-0.0396472	0.0523825
DAS30	AT5G22830	2579.48	~genotype	Wald	EV v Col-0	-0.66665	0.504995	IHW	0.934915	ashr	-0.0229119	0.0485907
DAS30	AT5G22940	370.558	~genotype	Wald	EV v Col-0	-0.292445	0.769946	IHW	1	ashr	-0.00743344	0.0659116
DAS30	AT5G23420	1127.66	~genotype	Wald	EV v Col-0	1.57814	0.114534	IHW	0.592827	ashr	0.0531	0.0589662
DAS30	AT5G23670	2005.67	~genotype	Wald	EV v Col-0	1.02427	0.305709	IHW	0.787956	ashr	0.0344488	0.0558402
DAS30	AT5G23850	691.472	~genotype	Wald	EV v Col-0	-1.24931	0.211551	IHW	0.794776	ashr	-0.0352717	0.0666542
DAS30	AT5G24080	19.5115	~genotype	Wald	EV v Col-0	-0.578708	0.562786	IHW	1	ashr	-0.00391864	0.077651
DAS30	AT5G24090	17.2142	~genotype	Wald	EV v Col-0	-1.0677	0.285655	IHW	1	ashr	-0.0127623	0.0772993
DAS30	AT5G24165	4761.53	~genotype	Wald	EV v Col-0	-0.776273	0.437588	IHW	0.872617	ashr	-0.0238947	0.0609941
DAS30	AT5G24210	4600.66	~genotype	Wald	EV v Col-0	0.502155	0.615559	IHW	0.968787	ashr	0.00917558	0.0717562
DAS30	AT5G24314	4270.02	~genotype	Wald	EV v Col-0	-0.961746	0.336177	IHW	0.811009	ashr	-0.0302459	0.0605313
DAS30	AT5G24490	13827.3	~genotype	Wald	EV v Col-0	1.10198	0.270468	IHW	0.631839	ashr	0.0214872	0.0738128
DAS30	AT5G24870	465.476	~genotype	Wald	EV v Col-0	0.630259	0.528525	IHW	1	ashr	0.0179053	0.0636224
DAS30	AT5G24990	205.577	~genotype	Wald	EV v Col-0	-3.42997	0.000603653	IHW	0.16941	ashr	-0.1656	0.157046
DAS30	AT5G25250	2126.13	~genotype	Wald	EV v Col-0	0.0589648	0.95298	IHW	1	ashr	0.000814854	0.073952
DAS30	AT5G25280	4024.94	~genotype	Wald	EV v Col-0	-1.98363	0.047297	IHW	0.571678	ashr	-0.0691902	0.0580803
DAS30	AT5G25350	3845.29	~genotype	Wald	EV v Col-0	0.215885	0.829077	IHW	1	ashr	0.006513	0.0609182
DAS30	AT5G25370	125.216	~genotype	Wald	EV v Col-0	-1.00981	0.312585	IHW	1	ashr	-0.0237755	0.0699512
DAS30	AT5G25770	574.689	~genotype	Wald	EV v Col-0	0.551625	0.581205	IHW	1	ashr	0.0140223	0.0663814
DAS30	AT5G25820	196.268	~genotype	Wald	EV v Col-0	-1.19	0.234045	IHW	1	ashr	-0.022233	0.0750478
DAS30	AT5G25930	713.699	~genotype	Wald	EV v Col-0	0.0308659	0.975376	IHW	1	ashr	0.000626441	0.0697027
DAS30	AT5G26000	144669	~genotype	Wald	EV v Col-0	-1.16493	0.244048	IHW	0.612728	ashr	-0.0270485	0.0713472
DAS30	AT5G26160	348.286	~genotype	Wald	EV v Col-0	1.63922	0.101167	IHW	0.644669	ashr	0.045466	0.0715523
DAS30	AT5G26670	681.859	~genotype	Wald	EV v Col-0	0.46015	0.645408	IHW	1	ashr	0.0125978	0.0643457
DAS30	AT5G26751	3242.89	~genotype	Wald	EV v Col-0	1.16495	0.24404	IHW	0.760214	ashr	0.0400876	0.0527145
DAS30	AT5G26820	3129.25	~genotype	Wald	EV v Col-0	-1.34317	0.179218	IHW	0.689981	ashr	-0.0465377	0.0502767
DAS30	AT5G26920	1820.02	~genotype	Wald	EV v Col-0	-0.0554075	0.955814	IHW	1	ashr	-0.000903706	0.0724096
DAS30	AT5G27390	1776.3	~genotype	Wald	EV v Col-0	-1.01812	0.30862	IHW	0.79059	ashr	-0.03331	0.0582799
DAS30	AT5G27420	624.863	~genotype	Wald	EV v Col-0	0.734147	0.462859	IHW	0.976712	ashr	0.0116989	0.0740176
DAS30	AT5G27450	747.674	~genotype	Wald	EV v Col-0	-0.944781	0.344771	IHW	0.906874	ashr	-0.0294019	0.0610091
DAS30	AT5G27600	1148.82	~genotype	Wald	EV v Col-0	-0.0402983	0.967855	IHW	1	ashr	-0.0010509	0.0651623
DAS30	AT5G27930	1225.97	~genotype	Wald	EV v Col-0	0.47865	0.632188	IHW	0.958911	ashr	0.013633	0.0632251
DAS30	AT5G28770	1448.67	~genotype	Wald	EV v Col-0	1.27478	0.202387	IHW	0.700733	ashr	0.026407	0.0744072
DAS30	AT5G30510	25389.3	~genotype	Wald	EV v Col-0	-0.967951	0.333069	IHW	0.82647	ashr	-0.0281111	0.0640112
DAS30	AT5G33290	1090.67	~genotype	Wald	EV v Col-0	-1.72492	0.0845424	IHW	0.557062	ashr	-0.0515824	0.0693148
DAS30	AT5G35360	8919.65	~genotype	Wald	EV v Col-0	-0.22542	0.821652	IHW	0.745876	ashr	-0.00771151	0.0513377
DAS30	AT5G35370	302.086	~genotype	Wald	EV v Col-0	0.131035	0.895748	IHW	1	ashr	0.00411449	0.0591206
DAS30	AT5G35735	2986.7	~genotype	Wald	EV v Col-0	-0.702361	0.482454	IHW	0.910895	ashr	-0.0214419	0.0611667
DAS30	AT5G35740	302.929	~genotype	Wald	EV v Col-0	-0.829961	0.406561	IHW	0.990466	ashr	-0.0160211	0.072278
DAS30	AT5G35790	6460.78	~genotype	Wald	EV v Col-0	0.0351806	0.971936	IHW	1	ashr	0.000901222	0.0655676
DAS30	AT5G37600	14524.1	~genotype	Wald	EV v Col-0	0.556785	0.577675	IHW	0.953463	ashr	0.0141027	0.0664756
DAS30	AT5G37660	191.054	~genotype	Wald	EV v Col-0	-2.332	0.0197004	IHW	0.602137	ashr	-0.0701291	0.0869987
DAS30	AT5G38240	143.236	~genotype	Wald	EV v Col-0	0.442257	0.658303	IHW	1	ashr	0.00854019	0.0708925
DAS30	AT5G38300	152.166	~genotype	Wald	EV v Col-0	-0.196884	0.843918	IHW	1	ashr	-0.00394626	0.0699751
DAS30	AT5G38430	82101.6	~genotype	Wald	EV v Col-0	-2.65986	0.00781727	IHW	0.244062	ashr	-0.0643443	0.108757
DAS30	AT5G38940	263.741	~genotype	Wald	EV v Col-0	0.84	0.400908	IHW	1	ashr	0.00746102	0.0774391
DAS30	AT5G39030	676.975	~genotype	Wald	EV v Col-0	0.694255	0.487522	IHW	1	ashr	0.0201242	0.0631272
DAS30	AT5G39520	615.153	~genotype	Wald	EV v Col-0	-2.1967	0.028042	IHW	0.451736	ashr	-0.0237006	0.0856117
DAS30	AT5G39530	4607.1	~genotype	Wald	EV v Col-0	0.0389322	0.968944	IHW	1	ashr	0.000980858	0.0659316
DAS30	AT5G39610	240.849	~genotype	Wald	EV v Col-0	0.177837	0.858851	IHW	1	ashr	0.00274126	0.0730471
DAS30	AT5G39660	496.552	~genotype	Wald	EV v Col-0	0.797736	0.425024	IHW	0.955815	ashr	0.0187166	0.0689078
DAS30	AT5G39785	252.989	~genotype	Wald	EV v Col-0	0.74713	0.454985	IHW	1	ashr	0.0188366	0.0671668
DAS30	AT5G40170	2462.57	~genotype	Wald	EV v Col-0	0.812463	0.416526	IHW	0.875802	ashr	0.0246446	0.0617425
DAS30	AT5G40240	793.811	~genotype	Wald	EV v Col-0	-1.39049	0.16438	IHW	0.650582	ashr	-0.0383713	0.0686857
DAS30	AT5G40740	872.675	~genotype	Wald	EV v Col-0	0.389201	0.697128	IHW	0.968553	ashr	0.0126708	0.0572237
DAS30	AT5G40950	16738.5	~genotype	Wald	EV v Col-0	-2.3927	0.0167248	IHW	0.203529	ashr	-0.0847514	0.0661156
DAS30	AT5G41060	410.795	~genotype	Wald	EV v Col-0	0.680518	0.496176	IHW	0.994909	ashr	0.0209704	0.0607013
DAS30	AT5G41410	1941.89	~genotype	Wald	EV v Col-0	-0.534917	0.592707	IHW	0.960661	ashr	-0.0173789	0.0575555
DAS30	AT5G41740	1142.87	~genotype	Wald	EV v Col-0	0.428154	0.668539	IHW	0.973167	ashr	0.00903056	0.0695807
DAS30	AT5G41750	1596.32	~genotype	Wald	EV v Col-0	0.404984	0.68549	IHW	0.996584	ashr	0.00527522	0.0747522
DAS30	AT5G42050	8847.4	~genotype	Wald	EV v Col-0	0.249573	0.802917	IHW	1	ashr	0.00611278	0.0666462
DAS30	AT5G42070	1727.65	~genotype	Wald	EV v Col-0	-1.53551	0.12466	IHW	0.755647	ashr	-0.0454239	0.0673566
DAS30	AT5G42240	2515.63	~genotype	Wald	EV v Col-0	0.638998	0.522824	IHW	0.945855	ashr	0.0210948	0.0565593
DAS30	AT5G42380	132.596	~genotype	Wald	EV v Col-0	-0.441993	0.658494	IHW	1	ashr	-0.00487209	0.0758329
DAS30	AT5G42810	736.024	~genotype	Wald	EV v Col-0	-1.01147	0.311793	IHW	0.884698	ashr	-0.034722	0.0525465
DAS30	AT5G42825	31.6193	~genotype	Wald	EV v Col-0	-0.518854	0.603863	IHW	1	ashr	-0.000751554	0.0840538
DAS30	AT5G43050	652.361	~genotype	Wald	EV v Col-0	-0.659764	0.509406	IHW	1	ashr	-0.0198015	0.061766
DAS30	AT5G43190	596.348	~genotype	Wald	EV v Col-0	-1.5375	0.124171	IHW	0.739189	ashr	-0.048104	0.0643725
DAS30	AT5G43450	808.292	~genotype	Wald	EV v Col-0	0.748622	0.454085	IHW	0.892322	ashr	0.00901038	0.0760658
DAS30	AT5G43670	729.197	~genotype	Wald	EV v Col-0	-0.784799	0.432571	IHW	1	ashr	-0.0267365	0.0533335
DAS30	AT5G43780	3300.92	~genotype	Wald	EV v Col-0	-0.150676	0.880231	IHW	1	ashr	-0.003995	0.0648083
DAS30	AT5G44060	360.908	~genotype	Wald	EV v Col-0	-1.39709	0.162386	IHW	0.776139	ashr	-0.0437006	0.0631683
DAS30	AT5G44340	14512	~genotype	Wald	EV v Col-0	-0.912819	0.361338	IHW	0.674447	ashr	-0.0313076	0.0471681
DAS30	AT5G44680	3183.46	~genotype	Wald	EV v Col-0	0.547613	0.583958	IHW	0.974434	ashr	0.0125105	0.0685334
DAS30	AT5G44980	44.7397	~genotype	Wald	EV v Col-0	-1.2275	0.219635	IHW	1	ashr	-0.0200603	0.0766389
DAS30	AT5G45040	405.48	~genotype	Wald	EV v Col-0	0.85783	0.390986	IHW	0.980173	ashr	0.0265452	0.0609897
DAS30	AT5G45110	1526.53	~genotype	Wald	EV v Col-0	0.174061	0.861817	IHW	1	ashr	0.00331823	0.0706397
DAS30	AT5G45260	1198.14	~genotype	Wald	EV v Col-0	0.729847	0.465484	IHW	0.884221	ashr	0.0240377	0.056935
DAS30	AT5G45290	920.187	~genotype	Wald	EV v Col-0	0.620235	0.535103	IHW	0.929329	ashr	0.0210284	0.0537113
DAS30	AT5G45380	1479.24	~genotype	Wald	EV v Col-0	-0.747617	0.454691	IHW	0.895391	ashr	-0.0142638	0.072054
DAS30	AT5G45390	10663.3	~genotype	Wald	EV v Col-0	-3.0642	0.00218252	IHW	0.0738773	ashr	-0.117561	0.0671181
DAS30	AT5G45490	3297.63	~genotype	Wald	EV v Col-0	-0.888308	0.374375	IHW	0.855171	ashr	-0.0205787	0.0695891
DAS30	AT5G45680	3770.98	~genotype	Wald	EV v Col-0	-1.80408	0.0712192	IHW	0.642554	ashr	-0.0516134	0.0730106
DAS30	AT5G45930	4848.73	~genotype	Wald	EV v Col-0	-0.237009	0.81265	IHW	1	ashr	-0.00578681	0.0666965
DAS30	AT5G45950	1965.49	~genotype	Wald	EV v Col-0	-1.43907	0.150131	IHW	0.659035	ashr	-0.0424296	0.0665133
DAS30	AT5G45990	44.466	~genotype	Wald	EV v Col-0	-0.407282	0.683801	IHW	1	ashr	-0.00691488	0.072387
DAS30	AT5G46080	200.528	~genotype	Wald	EV v Col-0	-0.0204234	0.983706	IHW	1	ashr	-0.00040446	0.0700493
DAS30	AT5G46110	78230.4	~genotype	Wald	EV v Col-0	-1.80852	0.0705256	IHW	0.355726	ashr	-0.0629842	0.0555368
DAS30	AT5G46180	1759.17	~genotype	Wald	EV v Col-0	-0.610627	0.541446	IHW	0.915233	ashr	-0.016914	0.0643366
DAS30	AT5G46290	6890.59	~genotype	Wald	EV v Col-0	-1.5934	0.111071	IHW	0.595435	ashr	-0.0450037	0.070147
DAS30	AT5G46295	9.97868	~genotype	Wald	EV v Col-0	0.843126	0.399158	IHW	1	ashr	0.00790198	0.0773026
DAS30	AT5G46410	946.215	~genotype	Wald	EV v Col-0	0.757738	0.448608	IHW	0.891083	ashr	0.0212926	0.0643229
DAS30	AT5G46420	4886.48	~genotype	Wald	EV v Col-0	1.33841	0.180763	IHW	0.692192	ashr	0.0458765	0.0546728
DAS30	AT5G46710	309.687	~genotype	Wald	EV v Col-0	1.61695	0.105889	IHW	0.769671	ashr	0.0485426	0.0675877
DAS30	AT5G46730	572.151	~genotype	Wald	EV v Col-0	-0.316923	0.751302	IHW	1	ashr	-0.00696946	0.0687043
DAS30	AT5G46760	3079.83	~genotype	Wald	EV v Col-0	0.967135	0.333477	IHW	0.98395	ashr	0.0332953	0.0513167
DAS30	AT5G46780	701.016	~genotype	Wald	EV v Col-0	-1.86501	0.0621804	IHW	0.55708	ashr	-0.0615768	0.0642709
DAS30	AT5G46830	91.3326	~genotype	Wald	EV v Col-0	-1.60477	0.108544	IHW	1	ashr	-0.0227914	0.0805811
DAS30	AT5G47070	880.185	~genotype	Wald	EV v Col-0	0.56783	0.570151	IHW	0.915954	ashr	0.0128116	0.0688142
DAS30	AT5G47190	9531.79	~genotype	Wald	EV v Col-0	-0.949947	0.342139	IHW	0.664738	ashr	-0.0271021	0.0645561
DAS30	AT5G47220	669.336	~genotype	Wald	EV v Col-0	2.68396	0.00727553	IHW	0.287115	ashr	0.0764648	0.110283
DAS30	AT5G47380	345.308	~genotype	Wald	EV v Col-0	1.1123	0.266007	IHW	0.853929	ashr	0.0327609	0.0641822
DAS30	AT5G47520	560.086	~genotype	Wald	EV v Col-0	1.01525	0.309988	IHW	0.919511	ashr	0.0328425	0.0590598
DAS30	AT5G47540	1112.57	~genotype	Wald	EV v Col-0	0.338037	0.735335	IHW	0.982763	ashr	0.01038	0.0602956
DAS30	AT5G47700	7726.89	~genotype	Wald	EV v Col-0	-0.701548	0.482961	IHW	0.739189	ashr	-0.0202371	0.0633116
DAS30	AT5G47770	3229.11	~genotype	Wald	EV v Col-0	-0.330288	0.741182	IHW	0.996584	ashr	-0.0102507	0.059812
DAS30	AT5G47850	106.072	~genotype	Wald	EV v Col-0	0.307502	0.758461	IHW	1	ashr	0.00503808	0.0725889
DAS30	AT5G47860	2023.9	~genotype	Wald	EV v Col-0	-0.122905	0.902183	IHW	1	ashr	-0.00373173	0.0606152
DAS30	AT5G47880	3043.4	~genotype	Wald	EV v Col-0	-1.57494	0.115269	IHW	0.739749	ashr	-0.0524661	0.0599829
DAS30	AT5G47910	2967.96	~genotype	Wald	EV v Col-0	-0.575987	0.564624	IHW	0.947022	ashr	-0.0197093	0.0469431
DAS30	AT5G48220	2606.77	~genotype	Wald	EV v Col-0	-1.24341	0.213715	IHW	0.730535	ashr	-0.038565	0.0625876
DAS30	AT5G48380	3814.89	~genotype	Wald	EV v Col-0	0.0610124	0.951349	IHW	1	ashr	0.00142886	0.0673826
DAS30	AT5G48400	270.438	~genotype	Wald	EV v Col-0	-1.30935	0.190415	IHW	0.919857	ashr	-0.0115611	0.0788638
DAS30	AT5G48410	83.0482	~genotype	Wald	EV v Col-0	-1.26098	0.207318	IHW	1	ashr	-0.0125869	0.0785637
DAS30	AT5G48460	1033.06	~genotype	Wald	EV v Col-0	-0.0795881	0.936565	IHW	1	ashr	-0.00235848	0.0615254
DAS30	AT5G48657	498.079	~genotype	Wald	EV v Col-0	-0.424436	0.671248	IHW	1	ashr	-0.0092332	0.0690786
DAS30	AT5G48900	1476.71	~genotype	Wald	EV v Col-0	0.166703	0.867604	IHW	1	ashr	0.00431628	0.0653791
DAS30	AT5G49030	6871.28	~genotype	Wald	EV v Col-0	-0.548876	0.58309	IHW	0.794726	ashr	-0.0171539	0.059776
DAS30	AT5G49530	878.687	~genotype	Wald	EV v Col-0	1.33982	0.180303	IHW	0.666157	ashr	0.0448372	0.0578394
DAS30	AT5G49555	1588.46	~genotype	Wald	EV v Col-0	0.562368	0.573866	IHW	0.929091	ashr	0.0185126	0.0566499
DAS30	AT5G49630	4535.55	~genotype	Wald	EV v Col-0	-1.942	0.0521373	IHW	0.500909	ashr	-0.0593463	0.0720906
DAS30	AT5G50360	16.6346	~genotype	Wald	EV v Col-0	0.155404	0.876503	IHW	1	ashr	0.00132157	0.0767002
DAS30	AT5G50450	648.795	~genotype	Wald	EV v Col-0	1.38562	0.165864	IHW	0.741589	ashr	0.0326436	0.0731493
DAS30	AT5G51040	1243.07	~genotype	Wald	EV v Col-0	-0.524929	0.599633	IHW	0.928064	ashr	-0.017275	0.056614
DAS30	AT5G51110	9224.96	~genotype	Wald	EV v Col-0	-3.36106	0.00077643	IHW	0.0792706	ashr	-0.149914	0.110206
DAS30	AT5G51510	639.313	~genotype	Wald	EV v Col-0	-0.313721	0.753733	IHW	1	ashr	-0.0104332	0.0554823
DAS30	AT5G52040	3059.7	~genotype	Wald	EV v Col-0	1.04267	0.2971	IHW	0.802552	ashr	0.0338596	0.0589044
DAS30	AT5G52100	2371.32	~genotype	Wald	EV v Col-0	-0.0726545	0.942081	IHW	1	ashr	-0.00182544	0.0659978
DAS30	AT5G52250	109.733	~genotype	Wald	EV v Col-0	2.09297	0.0363519	IHW	0.728356	ashr	0.0544034	0.0846042
DAS30	AT5G52390	228.549	~genotype	Wald	EV v Col-0	0.738474	0.460227	IHW	1	ashr	0.0104967	0.0749905
DAS30	AT5G52440	5889.42	~genotype	Wald	EV v Col-0	-2.67484	0.0074766	IHW	0.234184	ashr	-0.0973695	0.056478
DAS30	AT5G52450	930.355	~genotype	Wald	EV v Col-0	-0.25153	0.801404	IHW	1	ashr	-0.00566381	0.0682163
DAS30	AT5G52540	4473.92	~genotype	Wald	EV v Col-0	-2.51213	0.0120004	IHW	0.28257	ashr	-0.0855053	0.0830927
DAS30	AT5G52640	215.354	~genotype	Wald	EV v Col-0	0.204707	0.837801	IHW	1	ashr	0.00317102	0.0730243
DAS30	AT5G52750	891.377	~genotype	Wald	EV v Col-0	0.721114	0.470839	IHW	0.902855	ashr	0.0147962	0.0709097
DAS30	AT5G52840	5281.75	~genotype	Wald	EV v Col-0	-2.93618	0.00332286	IHW	0.117855	ashr	-0.109307	0.0595879
DAS30	AT5G52960	2009.01	~genotype	Wald	EV v Col-0	0.627061	0.530619	IHW	1	ashr	0.0174821	0.0641884
DAS30	AT5G53170	5493.57	~genotype	Wald	EV v Col-0	-0.268955	0.787964	IHW	0.848769	ashr	-0.00898941	0.0549645
DAS30	AT5G53300	17391.4	~genotype	Wald	EV v Col-0	-0.251775	0.801215	IHW	1	ashr	-0.00800698	0.0585246
DAS30	AT5G53450	2097.39	~genotype	Wald	EV v Col-0	2.23218	0.0256033	IHW	0.376405	ashr	0.0668327	0.0827565
DAS30	AT5G53490	5976.15	~genotype	Wald	EV v Col-0	-1.61426	0.106471	IHW	0.481422	ashr	-0.0537644	0.0603601
DAS30	AT5G53550	3797.3	~genotype	Wald	EV v Col-0	-0.408723	0.682743	IHW	0.999146	ashr	-0.0104412	0.0659707
DAS30	AT5G53750	119.324	~genotype	Wald	EV v Col-0	-1.23251	0.217759	IHW	1	ashr	-0.0303577	0.0705743
DAS30	AT5G53860	3533.77	~genotype	Wald	EV v Col-0	-0.842723	0.399383	IHW	0.870831	ashr	-0.0281719	0.0559007
DAS30	AT5G54200	720.678	~genotype	Wald	EV v Col-0	1.55113	0.120871	IHW	0.692803	ashr	0.0487927	0.0641739
DAS30	AT5G54270	302220	~genotype	Wald	EV v Col-0	-1.28736	0.197968	IHW	0.712791	ashr	-0.0366659	0.0666231
DAS30	AT5G54470	415.997	~genotype	Wald	EV v Col-0	0.949602	0.342315	IHW	0.946098	ashr	0.0288388	0.0621623
DAS30	AT5G54600	14638.2	~genotype	Wald	EV v Col-0	-1.08663	0.2772	IHW	0.640756	ashr	-0.035304	0.0590474
DAS30	AT5G54710	1493.96	~genotype	Wald	EV v Col-0	1.30066	0.193375	IHW	0.857298	ashr	0.0369633	0.0668111
DAS30	AT5G54840	328.553	~genotype	Wald	EV v Col-0	-0.0476396	0.962003	IHW	1	ashr	-0.00107305	0.0680696
DAS30	AT5G54870	1664.65	~genotype	Wald	EV v Col-0	-2.2913	0.0219461	IHW	0.357452	ashr	-0.0786126	0.0695509
DAS30	AT5G55480	1527.06	~genotype	Wald	EV v Col-0	-1.52171	0.128083	IHW	0.624586	ashr	-0.0433504	0.0688789
DAS30	AT5G55540	1455.22	~genotype	Wald	EV v Col-0	1.06521	0.286779	IHW	0.795135	ashr	0.0324076	0.0625744
DAS30	AT5G55560	180.886	~genotype	Wald	EV v Col-0	0.0988827	0.921231	IHW	1	ashr	0.00217512	0.0684843
DAS30	AT5G56180	1035.92	~genotype	Wald	EV v Col-0	0.645514	0.518594	IHW	0.92394	ashr	0.0181141	0.0640411
DAS30	AT5G56340	961.133	~genotype	Wald	EV v Col-0	0.401771	0.687853	IHW	0.977553	ashr	0.0105622	0.0652886
DAS30	AT5G56590	412.765	~genotype	Wald	EV v Col-0	0.606543	0.544154	IHW	1	ashr	0.0198425	0.0571951
DAS30	AT5G56720	101.357	~genotype	Wald	EV v Col-0	-0.226563	0.820764	IHW	1	ashr	-0.00440574	0.0704269
DAS30	AT5G56840	204.671	~genotype	Wald	EV v Col-0	-2.31456	0.020637	IHW	0.609707	ashr	-0.0672492	0.0884182
DAS30	AT5G56850	2971.93	~genotype	Wald	EV v Col-0	0.681287	0.49569	IHW	0.896203	ashr	0.0193843	0.0637062
DAS30	AT5G57030	4453.18	~genotype	Wald	EV v Col-0	-0.233157	0.815639	IHW	1	ashr	-0.0073959	0.0586506
DAS30	AT5G57035	1241.42	~genotype	Wald	EV v Col-0	0.58608	0.557822	IHW	0.925834	ashr	0.0168851	0.0630694
DAS30	AT5G57440	1039.24	~genotype	Wald	EV v Col-0	-1.66803	0.0953089	IHW	0.562541	ashr	-0.0569643	0.0578952
DAS30	AT5G57550	240.58	~genotype	Wald	EV v Col-0	-0.0778785	0.937925	IHW	1	ashr	-0.000638324	0.0768063
DAS30	AT5G57560	1284.3	~genotype	Wald	EV v Col-0	0.241702	0.809011	IHW	1	ashr	0.00315964	0.0745022
DAS30	AT5G57580	3237.69	~genotype	Wald	EV v Col-0	0.350234	0.726163	IHW	1	ashr	0.00956377	0.0642448
DAS30	AT5G57700	706.138	~genotype	Wald	EV v Col-0	0.440561	0.659531	IHW	1	ashr	0.0113757	0.0657827
DAS30	AT5G57710	5172.48	~genotype	Wald	EV v Col-0	0.342815	0.731738	IHW	0.725777	ashr	0.0115225	0.0544251
DAS30	AT5G57760	80.0315	~genotype	Wald	EV v Col-0	-1.10193	0.270494	IHW	1	ashr	-0.013179	0.0774552
DAS30	AT5G57785	107.186	~genotype	Wald	EV v Col-0	1.20334	0.228845	IHW	0.945855	ashr	0.0239791	0.0743279
DAS30	AT5G57910	333.817	~genotype	Wald	EV v Col-0	-0.253296	0.800039	IHW	1	ashr	-0.00536533	0.0692174
DAS30	AT5G58120	604.728	~genotype	Wald	EV v Col-0	0.695149	0.486962	IHW	0.994705	ashr	0.0162811	0.0685338
DAS30	AT5G58210	370.553	~genotype	Wald	EV v Col-0	0.289209	0.772422	IHW	1	ashr	0.00532777	0.071215
DAS30	AT5G58300	1054.22	~genotype	Wald	EV v Col-0	-0.191235	0.848342	IHW	1	ashr	-0.00575767	0.0609814
DAS30	AT5G58650	252.999	~genotype	Wald	EV v Col-0	-0.145537	0.884287	IHW	1	ashr	-0.00396447	0.0641206
DAS30	AT5G58680	78.1555	~genotype	Wald	EV v Col-0	-1.66127	0.0966601	IHW	0.969948	ashr	-0.0392779	0.0769255
DAS30	AT5G58787	742.76	~genotype	Wald	EV v Col-0	1.57721	0.114747	IHW	0.68093	ashr	0.0522988	0.0604454
DAS30	AT5G59220	208.355	~genotype	Wald	EV v Col-0	-0.489377	0.624575	IHW	1	ashr	-0.00949374	0.0709457
DAS30	AT5G59530	18.7214	~genotype	Wald	EV v Col-0	0.50816	0.611341	IHW	1	ashr	0.00632934	0.0752502
DAS30	AT5G59540	2142.23	~genotype	Wald	EV v Col-0	0.531781	0.594877	IHW	0.961825	ashr	0.0157343	0.0620387
DAS30	AT5G59613	5727.51	~genotype	Wald	EV v Col-0	-0.216574	0.82854	IHW	0.860805	ashr	-0.00711198	0.05646
DAS30	AT5G59690	5824.21	~genotype	Wald	EV v Col-0	-0.729097	0.465942	IHW	0.638052	ashr	-0.0236912	0.057916
DAS30	AT5G59700	266.735	~genotype	Wald	EV v Col-0	1.07053	0.284382	IHW	1	ashr	0.0319501	0.0634296
DAS30	AT5G59780	1468.53	~genotype	Wald	EV v Col-0	-0.106678	0.915044	IHW	1	ashr	-0.00213691	0.0699158
DAS30	AT5G59820	237.896	~genotype	Wald	EV v Col-0	-2.42835	0.0151677	IHW	0.557003	ashr	-0.0663754	0.0967166
DAS30	AT5G59970	1919.04	~genotype	Wald	EV v Col-0	0.294308	0.768523	IHW	1	ashr	0.0065607	0.0684433
DAS30	AT5G60360	20606.7	~genotype	Wald	EV v Col-0	-1.01142	0.311814	IHW	0.662629	ashr	-0.027362	0.0665278
DAS30	AT5G60790	4575.98	~genotype	Wald	EV v Col-0	-0.664307	0.506494	IHW	1	ashr	-0.0215904	0.0577627
DAS30	AT5G61130	2756.99	~genotype	Wald	EV v Col-0	-1.54651	0.12198	IHW	0.63088	ashr	-0.0384909	0.0738194
DAS30	AT5G61210	4000.27	~genotype	Wald	EV v Col-0	-0.534425	0.593048	IHW	0.939081	ashr	-0.0129778	0.0673232
DAS30	AT5G61500	1917.17	~genotype	Wald	EV v Col-0	0.189041	0.850061	IHW	1	ashr	0.00614709	0.0571445
DAS30	AT5G61530	2099.72	~genotype	Wald	EV v Col-0	0.0678996	0.945866	IHW	1	ashr	0.00202721	0.06125
DAS30	AT5G61560	535.826	~genotype	Wald	EV v Col-0	1.65	0.0989421	IHW	0.670387	ashr	0.0457858	0.0716985
DAS30	AT5G61640	445.476	~genotype	Wald	EV v Col-0	-0.0221773	0.982307	IHW	1	ashr	-0.000575022	0.0652931
DAS30	AT5G61820	1996.97	~genotype	Wald	EV v Col-0	-0.428908	0.66799	IHW	1	ashr	-0.00531956	0.0751259
DAS30	AT5G62000	12521.6	~genotype	Wald	EV v Col-0	1.49296	0.135448	IHW	0.639519	ashr	0.05187	0.0508721
DAS30	AT5G62020	281.238	~genotype	Wald	EV v Col-0	1.20199	0.229368	IHW	0.945855	ashr	0.0222531	0.0752535
DAS30	AT5G62150	66.4976	~genotype	Wald	EV v Col-0	-1.76539	0.0774988	IHW	0.945162	ashr	-0.0249114	0.0822547
DAS30	AT5G62165	259.658	~genotype	Wald	EV v Col-0	-0.74057	0.458954	IHW	1	ashr	-0.00958385	0.0756306
DAS30	AT5G62280	281.07	~genotype	Wald	EV v Col-0	0.619053	0.535881	IHW	1	ashr	0.0102961	0.0731774
DAS30	AT5G62410	1144.2	~genotype	Wald	EV v Col-0	1.89886	0.0575832	IHW	0.494004	ashr	0.0616691	0.066407
DAS30	AT5G62610	1337.67	~genotype	Wald	EV v Col-0	2.00283	0.0451951	IHW	0.454766	ashr	0.0705008	0.0547269
DAS30	AT5G62620	688.373	~genotype	Wald	EV v Col-0	-0.137037	0.891001	IHW	1	ashr	-0.00459825	0.0544765
DAS30	AT5G62740	1930.44	~genotype	Wald	EV v Col-0	-0.703332	0.481849	IHW	0.907298	ashr	-0.0230499	0.0572554
DAS30	AT5G63130	72.9449	~genotype	Wald	EV v Col-0	-2.1303	0.0331466	IHW	0.728246	ashr	-0.0389672	0.0889277
DAS30	AT5G63180	4326.88	~genotype	Wald	EV v Col-0	-2.43199	0.015016	IHW	0.328372	ashr	-0.083311	0.0765552
DAS30	AT5G63310	7385.06	~genotype	Wald	EV v Col-0	-3.35316	0.000798942	IHW	0.0824767	ashr	-0.153843	0.128205
DAS30	AT5G63700	748.182	~genotype	Wald	EV v Col-0	1.39649	0.162567	IHW	0.776139	ashr	0.0442342	0.0624178
DAS30	AT5G63760	375.243	~genotype	Wald	EV v Col-0	-0.862805	0.388245	IHW	0.978049	ashr	-0.0270442	0.0603726
DAS30	AT5G63780	3138.97	~genotype	Wald	EV v Col-0	0.0328032	0.973832	IHW	1	ashr	0.000962036	0.0618804
DAS30	AT5G64040	78115.7	~genotype	Wald	EV v Col-0	-0.65145	0.514756	IHW	0.74922	ashr	-0.0149562	0.0687602
DAS30	AT5G64190	85.4059	~genotype	Wald	EV v Col-0	-0.177905	0.858797	IHW	1	ashr	-0.00235975	0.0743364
DAS30	AT5G64260	1930.5	~genotype	Wald	EV v Col-0	-0.0737124	0.941239	IHW	1	ashr	-0.00185799	0.0659294
DAS30	AT5G64410	1931.85	~genotype	Wald	EV v Col-0	0.551022	0.581618	IHW	0.931669	ashr	0.0161024	0.0625166
DAS30	AT5G64430	1358.11	~genotype	Wald	EV v Col-0	-0.316671	0.751493	IHW	1	ashr	-0.00880806	0.0636951
DAS30	AT5G64450	6.80866	~genotype	Wald	EV v Col-0	0.263635	0.792061	IHW	1	ashr	0.00210806	0.0769582
DAS30	AT5G64460	2776.04	~genotype	Wald	EV v Col-0	-0.776698	0.437337	IHW	0.872617	ashr	-0.0253044	0.0578491
DAS30	AT5G64630	362.65	~genotype	Wald	EV v Col-0	0.119035	0.905248	IHW	1	ashr	0.00321188	0.0643544
DAS30	AT5G64940	17867.3	~genotype	Wald	EV v Col-0	-0.205446	0.837223	IHW	0.749763	ashr	-0.00673107	0.0566248
DAS30	AT5G65200	302.15	~genotype	Wald	EV v Col-0	-0.620917	0.534654	IHW	1	ashr	-0.0196833	0.0591778
DAS30	AT5G65220	16932.4	~genotype	Wald	EV v Col-0	-0.658856	0.509988	IHW	0.651333	ashr	-0.0167312	0.066702
DAS30	AT5G65240	453.958	~genotype	Wald	EV v Col-0	1.58708	0.112495	IHW	0.663655	ashr	0.053258	0.0593384
DAS30	AT5G65440	2387.83	~genotype	Wald	EV v Col-0	0.617475	0.536921	IHW	0.953326	ashr	0.0192006	0.0601464
DAS30	AT5G65600	51.9016	~genotype	Wald	EV v Col-0	0.794633	0.426827	IHW	1	ashr	0.0107265	0.0755547
DAS30	AT5G65810	1206.04	~genotype	Wald	EV v Col-0	-1.7516	0.0798434	IHW	0.552284	ashr	-0.0606653	0.0562475
DAS30	AT5G65920	335.073	~genotype	Wald	EV v Col-0	-0.365825	0.714496	IHW	1	ashr	-0.0107075	0.0621666
DAS30	AT5G66005	359.967	~genotype	Wald	EV v Col-0	-0.56064	0.575043	IHW	1	ashr	-0.0159442	0.0634304
DAS30	AT5G66070	430.334	~genotype	Wald	EV v Col-0	-0.848905	0.395934	IHW	0.961231	ashr	-0.023581	0.0649974
DAS30	AT5G66410	839.203	~genotype	Wald	EV v Col-0	-0.400984	0.688432	IHW	0.966258	ashr	-0.0128545	0.0582112
DAS30	AT5G66530	4222.52	~genotype	Wald	EV v Col-0	-1.97389	0.0483941	IHW	0.489655	ashr	-0.0635852	0.0686176
DAS30	AT5G66550	704.919	~genotype	Wald	EV v Col-0	0.127222	0.898764	IHW	1	ashr	0.00400592	0.0589799
DAS30	AT5G66580	223.968	~genotype	Wald	EV v Col-0	-0.443588	0.657341	IHW	1	ashr	-0.00933458	0.0696507
DAS30	AT5G66620	221.292	~genotype	Wald	EV v Col-0	-1.35511	0.175384	IHW	1	ashr	-0.0384074	0.0673729
DAS30	AT5G66650	119.33	~genotype	Wald	EV v Col-0	0.503276	0.614771	IHW	1	ashr	0.0115653	0.0683111
DAS30	AT5G67200	383.028	~genotype	Wald	EV v Col-0	0.215723	0.829204	IHW	1	ashr	0.00564642	0.0651637
DAS30	AT5G67280	1687.6	~genotype	Wald	EV v Col-0	-1.07839	0.280858	IHW	0.79012	ashr	-0.0275752	0.0684715
DAS30	AT5G67310	33.185	~genotype	Wald	EV v Col-0	-1.05541	0.291236	IHW	1	ashr	-0.00982852	0.0779124
DAS30	AT5G67480	1523.89	~genotype	Wald	EV v Col-0	0.751555	0.452319	IHW	0.896203	ashr	0.0198741	0.066019
DAS30	AT1G01240	1473.75	~genotype	Wald	slim1-cr v Col-0	-0.0499325	0.960176	IHW	0.904685	ashr	-0.00408641	0.144504
DAS30	AT1G01355	8.80517	~genotype	Wald	slim1-cr v Col-0	-0.0811327	0.935336	IHW	1	ashr	-0.00366644	0.175966
DAS30	AT1G01500	1105.42	~genotype	Wald	slim1-cr v Col-0	-0.970371	0.331862	IHW	0.591887	ashr	-0.0768879	0.0946815
DAS30	AT1G01550	6399.35	~genotype	Wald	slim1-cr v Col-0	-1.81523	0.0694889	IHW	0.204181	ashr	-0.132194	0.0830991
DAS30	AT1G01560	467.39	~genotype	Wald	slim1-cr v Col-0	-0.220575	0.825424	IHW	0.87901	ashr	-0.0163169	0.155325
DAS30	AT1G01620	11263.8	~genotype	Wald	slim1-cr v Col-0	-1.16575	0.243716	IHW	0.432831	ashr	-0.0994676	0.110741
DAS30	AT1G01970	1643.81	~genotype	Wald	slim1-cr v Col-0	0.0397123	0.968322	IHW	0.908397	ashr	0.00302582	0.0888351
DAS30	AT1G02390	92.3059	~genotype	Wald	slim1-cr v Col-0	-1.12826	0.259209	IHW	0.650715	ashr	-0.0795409	0.16299
DAS30	AT1G02460	154.188	~genotype	Wald	slim1-cr v Col-0	-2.23293	0.0255536	IHW	0.170722	ashr	-0.183278	0.169614
DAS30	AT1G02470	139.481	~genotype	Wald	slim1-cr v Col-0	-0.150674	0.880233	IHW	1	ashr	-0.00982295	0.163153
DAS30	AT1G02610	264.177	~genotype	Wald	slim1-cr v Col-0	-0.601917	0.547229	IHW	0.993929	ashr	-0.0401119	0.163095
DAS30	AT1G02640	1073.84	~genotype	Wald	slim1-cr v Col-0	-0.800916	0.42318	IHW	0.671815	ashr	-0.067868	0.13936
DAS30	AT1G02660	559.772	~genotype	Wald	slim1-cr v Col-0	-0.669653	0.503079	IHW	0.812839	ashr	-0.0571439	0.137024
DAS30	AT1G02740	419.09	~genotype	Wald	slim1-cr v Col-0	-1.31539	0.188378	IHW	0.476752	ashr	-0.10508	0.0960265
DAS30	AT1G02850	424.751	~genotype	Wald	slim1-cr v Col-0	2.52827	0.0114626	IHW	0.0853155	ashr	0.146451	0.265527
DAS30	AT1G03200	53.0201	~genotype	Wald	slim1-cr v Col-0	0.0661876	0.947228	IHW	1	ashr	0.00510564	0.151567
DAS30	AT1G03370	2232.43	~genotype	Wald	slim1-cr v Col-0	-0.636624	0.52437	IHW	0.641938	ashr	-0.0552621	0.119341
DAS30	AT1G03495	193.046	~genotype	Wald	slim1-cr v Col-0	-1.67972	0.0930114	IHW	0.371429	ashr	-0.142427	0.146385
DAS30	AT1G03550	291.263	~genotype	Wald	slim1-cr v Col-0	-2.24905	0.024509	IHW	0.217113	ashr	-0.199984	0.13495
DAS30	AT1G03600	18374.8	~genotype	Wald	slim1-cr v Col-0	-3.14881	0.00163939	IHW	0.0181191	ashr	-0.230083	0.0836887
DAS30	AT1G03630	10984.9	~genotype	Wald	slim1-cr v Col-0	-0.719555	0.471799	IHW	0.641876	ashr	-0.0521934	0.0826071
DAS30	AT1G03730	362.898	~genotype	Wald	slim1-cr v Col-0	-0.71256	0.476118	IHW	0.970116	ashr	-0.0612464	0.113754
DAS30	AT1G03740	2011.52	~genotype	Wald	slim1-cr v Col-0	-1.44389	0.14877	IHW	0.317485	ashr	-0.125588	0.118398
DAS30	AT1G03940	228.835	~genotype	Wald	slim1-cr v Col-0	-0.352361	0.724567	IHW	1	ashr	-0.025145	0.158159
DAS30	AT1G04070	203.284	~genotype	Wald	slim1-cr v Col-0	0.583408	0.559618	IHW	0.964052	ashr	0.0506049	0.118842
DAS30	AT1G04250	798.724	~genotype	Wald	slim1-cr v Col-0	1.5886	0.11215	IHW	0.309615	ashr	0.136943	0.113909
DAS30	AT1G04280	972.346	~genotype	Wald	slim1-cr v Col-0	-0.392527	0.694669	IHW	0.847606	ashr	-0.0338726	0.11582
DAS30	AT1G04400	6888.79	~genotype	Wald	slim1-cr v Col-0	-0.00933318	0.992553	IHW	0.906531	ashr	-0.000697858	0.0863278
DAS30	AT1G04420	5527.77	~genotype	Wald	slim1-cr v Col-0	1.65352	0.0982245	IHW	0.250369	ashr	0.127354	0.0903512
DAS30	AT1G04570	117.89	~genotype	Wald	slim1-cr v Col-0	-1.53843	0.123943	IHW	0.714765	ashr	-0.13315	0.138136
DAS30	AT1G04680	4043.73	~genotype	Wald	slim1-cr v Col-0	-1.50655	0.131927	IHW	0.296161	ashr	-0.126088	0.105262
DAS30	AT1G04800	4529.27	~genotype	Wald	slim1-cr v Col-0	1.51435	0.129938	IHW	0.313253	ashr	0.128569	0.143909
DAS30	AT1G04820	14378.8	~genotype	Wald	slim1-cr v Col-0	-0.978969	0.327595	IHW	0.505104	ashr	-0.0808239	0.1023
DAS30	AT1G04920	142.067	~genotype	Wald	slim1-cr v Col-0	0.134998	0.892614	IHW	1	ashr	0.0117301	0.126873
DAS30	AT1G04940	3460.33	~genotype	Wald	slim1-cr v Col-0	-0.808546	0.418777	IHW	0.591323	ashr	-0.0563206	0.0781253
DAS30	AT1G04970	1239.35	~genotype	Wald	slim1-cr v Col-0	-0.504078	0.614206	IHW	0.813091	ashr	-0.0385635	0.0893969
DAS30	AT1G05060	634.934	~genotype	Wald	slim1-cr v Col-0	-2.36594	0.0179845	IHW	0.102065	ashr	-0.153077	0.0710425
DAS30	AT1G05190	16274.4	~genotype	Wald	slim1-cr v Col-0	1.95259	0.050868	IHW	0.168306	ashr	0.166613	0.11012
DAS30	AT1G05210	278.361	~genotype	Wald	slim1-cr v Col-0	-1.14864	0.250703	IHW	0.815157	ashr	-0.0987476	0.113426
DAS30	AT1G05560	1390.32	~genotype	Wald	slim1-cr v Col-0	3.20004	0.00137408	IHW	0.0160069	ashr	0.31028	0.220821
DAS30	AT1G05570	4819.58	~genotype	Wald	slim1-cr v Col-0	-3.54584	0.000391364	IHW	0.00678465	ashr	-0.335953	0.148547
DAS30	AT1G05575	67.5306	~genotype	Wald	slim1-cr v Col-0	3.67085	0.000241746	IHW	0.0129453	ashr	0.411744	0.269036
DAS30	AT1G05783	13.2614	~genotype	Wald	slim1-cr v Col-0	-0.706032	0.480168	IHW	1	ashr	-0.0369257	0.173989
DAS30	AT1G05850	24990.8	~genotype	Wald	slim1-cr v Col-0	-3.73906	0.000184709	IHW	0.00397442	ashr	-0.225292	0.0651988
DAS30	AT1G06050	332.328	~genotype	Wald	slim1-cr v Col-0	0.293199	0.76937	IHW	1	ashr	0.0254831	0.126856
DAS30	AT1G06190	3595.82	~genotype	Wald	slim1-cr v Col-0	0.321583	0.747769	IHW	0.681197	ashr	0.0236602	0.0843041
DAS30	AT1G06360	1728.08	~genotype	Wald	slim1-cr v Col-0	-1.65324	0.098282	IHW	0.251912	ashr	-0.144303	0.119744
DAS30	AT1G06780	503.102	~genotype	Wald	slim1-cr v Col-0	-0.0325442	0.974038	IHW	1	ashr	-0.00273629	0.106736
DAS30	AT1G07000	1188.72	~genotype	Wald	slim1-cr v Col-0	-1.08369	0.278501	IHW	0.537225	ashr	-0.0937209	0.13422
DAS30	AT1G07135	666.032	~genotype	Wald	slim1-cr v Col-0	0.629963	0.528719	IHW	0.751539	ashr	0.05427	0.133645
DAS30	AT1G07320	20377.9	~genotype	Wald	slim1-cr v Col-0	1.43306	0.15184	IHW	0.326393	ashr	0.115308	0.0972701
DAS30	AT1G07530	1472.4	~genotype	Wald	slim1-cr v Col-0	-0.342981	0.731613	IHW	0.790163	ashr	-0.023927	0.0782809
DAS30	AT1G07570	543.503	~genotype	Wald	slim1-cr v Col-0	2.187	0.0287428	IHW	0.125261	ashr	0.172265	0.0937326
DAS30	AT1G07620	343.707	~genotype	Wald	slim1-cr v Col-0	-0.731907	0.464226	IHW	0.954363	ashr	-0.0533267	0.157867
DAS30	AT1G07630	1199.97	~genotype	Wald	slim1-cr v Col-0	-0.00833914	0.993346	IHW	1	ashr	-0.000651657	0.0925031
DAS30	AT1G07820	3270.56	~genotype	Wald	slim1-cr v Col-0	0.0833638	0.933562	IHW	0.876453	ashr	0.00585707	0.0790351
DAS30	AT1G07900	97.6019	~genotype	Wald	slim1-cr v Col-0	-1.53427	0.124962	IHW	0.434005	ashr	-0.098951	0.17535
DAS30	AT1G08280	308.485	~genotype	Wald	slim1-cr v Col-0	-0.508064	0.611409	IHW	1	ashr	-0.0439807	0.117532
DAS30	AT1G08520	13163.7	~genotype	Wald	slim1-cr v Col-0	-0.133502	0.893796	IHW	0.857334	ashr	-0.00990899	0.0853923
DAS30	AT1G08540	5035	~genotype	Wald	slim1-cr v Col-0	-2.60602	0.00915998	IHW	0.0570303	ashr	-0.207616	0.0956085
DAS30	AT1G08620	1189.81	~genotype	Wald	slim1-cr v Col-0	-0.99213	0.321134	IHW	0.5747	ashr	-0.0848634	0.111698
DAS30	AT1G09230	811.32	~genotype	Wald	slim1-cr v Col-0	-2.4437	0.0145373	IHW	0.0879767	ashr	-0.197176	0.0977512
DAS30	AT1G09480	53.6783	~genotype	Wald	slim1-cr v Col-0	0.93165	0.351518	IHW	1	ashr	0.0740438	0.15056
DAS30	AT1G09560	2914.26	~genotype	Wald	slim1-cr v Col-0	-4.56074	5.0973e-06	IHW	0.000312846	ashr	-0.535614	0.22115
DAS30	AT1G09580	364.56	~genotype	Wald	slim1-cr v Col-0	2.02416	0.0429533	IHW	0.235723	ashr	0.165613	0.100315
DAS30	AT1G09645	638.977	~genotype	Wald	slim1-cr v Col-0	1.24719	0.212327	IHW	0.447315	ashr	0.107147	0.113057
DAS30	AT1G09750	12856.9	~genotype	Wald	slim1-cr v Col-0	-3.52572	0.000422327	IHW	0.0070451	ashr	-0.329087	0.140834
DAS30	AT1G10030	524.891	~genotype	Wald	slim1-cr v Col-0	2.7255	0.00642043	IHW	0.0532723	ashr	0.209255	0.0900109
DAS30	AT1G10120	862.296	~genotype	Wald	slim1-cr v Col-0	1.00436	0.315204	IHW	0.579115	ashr	0.0853925	0.109712
DAS30	AT1G10140	265.342	~genotype	Wald	slim1-cr v Col-0	-2.10674	0.0351398	IHW	0.212533	ashr	-0.166643	0.171466
DAS30	AT1G10150	743.123	~genotype	Wald	slim1-cr v Col-0	-0.26002	0.794848	IHW	0.924127	ashr	-0.0209512	0.0975783
DAS30	AT1G10657	889.198	~genotype	Wald	slim1-cr v Col-0	2.92016	0.00349856	IHW	0.0350851	ashr	0.227161	0.0919623
DAS30	AT1G10670	7508.22	~genotype	Wald	slim1-cr v Col-0	2.17242	0.029824	IHW	0.119914	ashr	0.122566	0.0602355
DAS30	AT1G10960	4582.87	~genotype	Wald	slim1-cr v Col-0	-2.42807	0.0151792	IHW	0.0833076	ashr	-0.209159	0.112475
DAS30	AT1G11000	292.468	~genotype	Wald	slim1-cr v Col-0	1.38846	0.164997	IHW	0.554762	ashr	0.120946	0.119554
DAS30	AT1G11210	382.662	~genotype	Wald	slim1-cr v Col-0	1.23229	0.21784	IHW	0.562849	ashr	0.0857767	0.165019
DAS30	AT1G11303	536.369	~genotype	Wald	slim1-cr v Col-0	2.11253	0.0346407	IHW	0.174625	ashr	0.173692	0.10127
DAS30	AT1G11545	793.527	~genotype	Wald	slim1-cr v Col-0	-1.26868	0.204557	IHW	0.441192	ashr	-0.101612	0.0964743
DAS30	AT1G11850	1162.47	~genotype	Wald	slim1-cr v Col-0	-0.473311	0.635991	IHW	0.819634	ashr	-0.0403339	0.136891
DAS30	AT1G11860	43300.6	~genotype	Wald	slim1-cr v Col-0	2.53873	0.0111257	IHW	0.066517	ashr	0.219457	0.11342
DAS30	AT1G11870	1632.8	~genotype	Wald	slim1-cr v Col-0	-0.57707	0.563892	IHW	0.699197	ashr	-0.0476739	0.10249
DAS30	AT1G12080	571.035	~genotype	Wald	slim1-cr v Col-0	1.18107	0.237576	IHW	0.486473	ashr	0.102911	0.130485
DAS30	AT1G12220	755.111	~genotype	Wald	slim1-cr v Col-0	-0.514757	0.606723	IHW	0.783767	ashr	-0.0425686	0.102714
DAS30	AT1G12290	249.077	~genotype	Wald	slim1-cr v Col-0	-1.06822	0.285421	IHW	0.676946	ashr	-0.0925754	0.133093
DAS30	AT1G12310	2395.22	~genotype	Wald	slim1-cr v Col-0	1.71281	0.086747	IHW	0.209761	ashr	0.148346	0.115582
DAS30	AT1G12360	2829.09	~genotype	Wald	slim1-cr v Col-0	-2.12073	0.0339442	IHW	0.131273	ashr	-0.169947	0.096544
DAS30	AT1G12450	377.51	~genotype	Wald	slim1-cr v Col-0	-0.115246	0.908251	IHW	1	ashr	-0.00991572	0.114479
DAS30	AT1G12460	639.407	~genotype	Wald	slim1-cr v Col-0	-1.56103	0.118516	IHW	0.320691	ashr	-0.119529	0.0895219
DAS30	AT1G12770	2764.18	~genotype	Wald	slim1-cr v Col-0	-0.356245	0.721657	IHW	0.816272	ashr	-0.0239741	0.0746502
DAS30	AT1G12800	11807.3	~genotype	Wald	slim1-cr v Col-0	-1.13462	0.256533	IHW	0.443436	ashr	-0.0894106	0.0937937
DAS30	AT1G12900	90602.4	~genotype	Wald	slim1-cr v Col-0	1.2536	0.209987	IHW	0.394117	ashr	0.100208	0.0961386
DAS30	AT1G12940	52.8004	~genotype	Wald	slim1-cr v Col-0	1.01689	0.309205	IHW	1	ashr	0.0549126	0.175658
DAS30	AT1G12970	453.113	~genotype	Wald	slim1-cr v Col-0	0.208837	0.834575	IHW	0.967339	ashr	0.0171805	0.101615
DAS30	AT1G12990	1474.79	~genotype	Wald	slim1-cr v Col-0	-2.03	0.0423569	IHW	0.154097	ashr	-0.175671	0.114618
DAS30	AT1G13170	1294.98	~genotype	Wald	slim1-cr v Col-0	2.10783	0.0350458	IHW	0.156468	ashr	0.162195	0.0902408
DAS30	AT1G13210	5082.8	~genotype	Wald	slim1-cr v Col-0	-1.6583	0.0972572	IHW	0.255832	ashr	-0.144524	0.136531
DAS30	AT1G13250	845.948	~genotype	Wald	slim1-cr v Col-0	-1.3946	0.163136	IHW	0.38382	ashr	-0.117801	0.107644
DAS30	AT1G13260	4051.86	~genotype	Wald	slim1-cr v Col-0	0.593466	0.552869	IHW	0.659313	ashr	0.0516625	0.125413
DAS30	AT1G13520	84.3968	~genotype	Wald	slim1-cr v Col-0	-0.356327	0.721596	IHW	1	ashr	-0.0176281	0.174018
DAS30	AT1G13570	632.084	~genotype	Wald	slim1-cr v Col-0	1.09675	0.27275	IHW	0.522751	ashr	0.0908879	0.103095
DAS30	AT1G13830	71.9962	~genotype	Wald	slim1-cr v Col-0	-1.10523	0.26906	IHW	1	ashr	-0.0666766	0.171931
DAS30	AT1G14190	90.9932	~genotype	Wald	slim1-cr v Col-0	0.196723	0.844044	IHW	1	ashr	0.0161059	0.144522
DAS30	AT1G14200	554.073	~genotype	Wald	slim1-cr v Col-0	1.78101	0.0749109	IHW	0.276246	ashr	0.156446	0.133008
DAS30	AT1G14270	3262.98	~genotype	Wald	slim1-cr v Col-0	-1.0871	0.276992	IHW	0.488048	ashr	-0.0852676	0.0930636
DAS30	AT1G14290	1272.75	~genotype	Wald	slim1-cr v Col-0	-1.57503	0.115249	IHW	0.276936	ashr	-0.129254	0.10096
DAS30	AT1G14345	3291.56	~genotype	Wald	slim1-cr v Col-0	-3.41304	0.000642427	IHW	0.00916642	ashr	-0.274479	0.097523
DAS30	AT1G14370	705.907	~genotype	Wald	slim1-cr v Col-0	-1.17096	0.241613	IHW	0.494104	ashr	-0.100732	0.136954
DAS30	AT1G14400	4582.74	~genotype	Wald	slim1-cr v Col-0	0.148385	0.882039	IHW	0.903279	ashr	0.010887	0.0839656
DAS30	AT1G14700	439.34	~genotype	Wald	slim1-cr v Col-0	-1.02846	0.303736	IHW	0.615504	ashr	-0.0892916	0.131762
DAS30	AT1G14870	403.6	~genotype	Wald	slim1-cr v Col-0	1.2314	0.218173	IHW	0.761173	ashr	0.107505	0.12258
DAS30	AT1G15180	1442.14	~genotype	Wald	slim1-cr v Col-0	-1.33284	0.182583	IHW	0.371106	ashr	-0.109476	0.101175
DAS30	AT1G15530	723.111	~genotype	Wald	slim1-cr v Col-0	-2.22907	0.0258093	IHW	0.128345	ashr	-0.17283	0.0913453
DAS30	AT1G15570	597.408	~genotype	Wald	slim1-cr v Col-0	-1.33258	0.18267	IHW	0.418078	ashr	-0.112067	0.106516
DAS30	AT1G15690	31266.6	~genotype	Wald	slim1-cr v Col-0	-4.88994	1.00866e-06	IHW	8.61034e-05	ashr	-0.356737	0.0848309
DAS30	AT1G15780	2591.86	~genotype	Wald	slim1-cr v Col-0	-1.99728	0.0457945	IHW	0.152463	ashr	-0.168443	0.10694
DAS30	AT1G15820	241178	~genotype	Wald	slim1-cr v Col-0	0.631474	0.52773	IHW	0.679651	ashr	0.054927	0.127451
DAS30	AT1G15830	495.131	~genotype	Wald	slim1-cr v Col-0	-0.391221	0.695634	IHW	0.870091	ashr	-0.0324367	0.142715
DAS30	AT1G15825	125.644	~genotype	Wald	slim1-cr v Col-0	-0.680724	0.496046	IHW	0.926569	ashr	-0.0541837	0.149292
DAS30	AT1G15890	219.299	~genotype	Wald	slim1-cr v Col-0	-1.3111	0.189825	IHW	0.564995	ashr	-0.105329	0.151902
DAS30	AT1G15910	1126.1	~genotype	Wald	slim1-cr v Col-0	2.48959	0.0127892	IHW	0.0827851	ashr	0.197596	0.0949755
DAS30	AT1G15970	585.548	~genotype	Wald	slim1-cr v Col-0	0.554145	0.57948	IHW	0.791523	ashr	0.0425736	0.0899937
DAS30	AT1G16020	818.206	~genotype	Wald	slim1-cr v Col-0	-0.989863	0.322241	IHW	0.569925	ashr	-0.0751324	0.0883097
DAS30	AT1G16110	550.729	~genotype	Wald	slim1-cr v Col-0	-0.268393	0.788397	IHW	1	ashr	-0.0224686	0.14074
DAS30	AT1G16390	162.172	~genotype	Wald	slim1-cr v Col-0	-0.291637	0.770564	IHW	1	ashr	-0.0226201	0.151216
DAS30	AT1G16540	454.416	~genotype	Wald	slim1-cr v Col-0	0.626107	0.531245	IHW	0.833568	ashr	0.0513585	0.100988
DAS30	AT1G16670	784.985	~genotype	Wald	slim1-cr v Col-0	-0.283436	0.776842	IHW	0.903279	ashr	-0.0237862	0.14026
DAS30	AT1G16920	1053.5	~genotype	Wald	slim1-cr v Col-0	3.3892	0.000700965	IHW	0.0121397	ashr	0.267117	0.0941786
DAS30	AT1G17370	2540.44	~genotype	Wald	slim1-cr v Col-0	-4.36228	1.28711e-05	IHW	0.000547941	ashr	-0.264972	0.0659456
DAS30	AT1G17440	2004.94	~genotype	Wald	slim1-cr v Col-0	-4.98026	6.34983e-07	IHW	4.998e-05	ashr	-0.39584	0.0980049
DAS30	AT1G17550	1996.29	~genotype	Wald	slim1-cr v Col-0	-0.0423563	0.966215	IHW	0.864531	ashr	-0.00323223	0.0890473
DAS30	AT1G17600	676.382	~genotype	Wald	slim1-cr v Col-0	-1.9027	0.0570794	IHW	0.210232	ashr	-0.167299	0.135403
DAS30	AT1G17650	2345.16	~genotype	Wald	slim1-cr v Col-0	1.67816	0.0933163	IHW	0.244376	ashr	0.136892	0.0997692
DAS30	AT1G18390	435.656	~genotype	Wald	slim1-cr v Col-0	-0.246833	0.805037	IHW	0.867773	ashr	-0.0214025	0.118987
DAS30	AT1G18440	795.648	~genotype	Wald	slim1-cr v Col-0	-0.760607	0.446892	IHW	0.681415	ashr	-0.0616265	0.0985738
DAS30	AT1G18470	2258.47	~genotype	Wald	slim1-cr v Col-0	-0.319828	0.749098	IHW	0.762881	ashr	-0.0224052	0.078723
DAS30	AT1G18570	825.22	~genotype	Wald	slim1-cr v Col-0	-0.326391	0.744129	IHW	0.902154	ashr	-0.0280612	0.133715
DAS30	AT1G18620	3392.9	~genotype	Wald	slim1-cr v Col-0	-0.234123	0.81489	IHW	0.711995	ashr	-0.0199406	0.110547
DAS30	AT1G18750	170.417	~genotype	Wald	slim1-cr v Col-0	-0.525299	0.599375	IHW	1	ashr	-0.0454523	0.117231
DAS30	AT1G18860	28.6912	~genotype	Wald	slim1-cr v Col-0	0.728374	0.466385	IHW	1	ashr	0.0339409	0.177731
DAS30	AT1G18890	1906.94	~genotype	Wald	slim1-cr v Col-0	-1.86502	0.0621786	IHW	0.170888	ashr	-0.15625	0.105383
DAS30	AT1G18900	736.092	~genotype	Wald	slim1-cr v Col-0	-9.5549	1.23701e-21	IHW	2.15847e-18	ashr	-1.0499	0.114467
DAS30	AT1G19020	490.958	~genotype	Wald	slim1-cr v Col-0	1.32375	0.185587	IHW	0.473027	ashr	0.109192	0.147953
DAS30	AT1G19200	82.3885	~genotype	Wald	slim1-cr v Col-0	-1.23763	0.215853	IHW	0.606547	ashr	-0.0920848	0.159694
DAS30	AT1G19270	846.95	~genotype	Wald	slim1-cr v Col-0	-1.2117	0.225628	IHW	0.456138	ashr	-0.105797	0.12296
DAS30	AT1G19950	470.993	~genotype	Wald	slim1-cr v Col-0	-2.16307	0.0305361	IHW	0.158153	ashr	-0.18655	0.113203
DAS30	AT1G20810	2089.12	~genotype	Wald	slim1-cr v Col-0	0.452416	0.650969	IHW	0.732138	ashr	0.0338775	0.0865171
DAS30	AT1G20840	2922.8	~genotype	Wald	slim1-cr v Col-0	-2.87806	0.00400132	IHW	0.0276904	ashr	-0.240154	0.104308
DAS30	AT1G20980	3790.42	~genotype	Wald	slim1-cr v Col-0	-2.15897	0.0308525	IHW	0.117875	ashr	-0.14693	0.0757906
DAS30	AT1G21000	1333.54	~genotype	Wald	slim1-cr v Col-0	-0.4324	0.665451	IHW	0.847606	ashr	-0.0376217	0.123291
DAS30	AT1G21070	300.361	~genotype	Wald	slim1-cr v Col-0	0.796131	0.425956	IHW	0.853622	ashr	0.062986	0.0944388
DAS30	AT1G21450	1326.81	~genotype	Wald	slim1-cr v Col-0	0.441771	0.658655	IHW	0.748721	ashr	0.0373489	0.108223
DAS30	AT1G21740	312.831	~genotype	Wald	slim1-cr v Col-0	1.19163	0.233406	IHW	0.585164	ashr	0.104097	0.127042
DAS30	AT1G21830	592.836	~genotype	Wald	slim1-cr v Col-0	-0.63132	0.527831	IHW	0.758255	ashr	-0.0537251	0.110167
DAS30	AT1G21880	1185.55	~genotype	Wald	slim1-cr v Col-0	-1.53985	0.123597	IHW	0.28972	ashr	-0.134985	0.125144
DAS30	AT1G21910	196.867	~genotype	Wald	slim1-cr v Col-0	-1.1399	0.254329	IHW	0.642072	ashr	-0.0959663	0.14261
DAS30	AT1G22170	305.258	~genotype	Wald	slim1-cr v Col-0	3.50814	0.000451253	IHW	0.012332	ashr	0.297913	0.108461
DAS30	AT1G22280	1935.84	~genotype	Wald	slim1-cr v Col-0	0.0339106	0.972948	IHW	0.878146	ashr	0.00294234	0.128388
DAS30	AT1G22570	1106.36	~genotype	Wald	slim1-cr v Col-0	-3.54404	0.000394049	IHW	0.0080634	ashr	-0.344919	0.165779
DAS30	AT1G22800	555.414	~genotype	Wald	slim1-cr v Col-0	4.08663	4.37684e-05	IHW	0.00154616	ashr	0.329165	0.0985393
DAS30	AT1G22890	844.583	~genotype	Wald	slim1-cr v Col-0	-1.51463	0.129865	IHW	0.347155	ashr	-0.122269	0.15348
DAS30	AT1G22930	7103.74	~genotype	Wald	slim1-cr v Col-0	-2.28462	0.0223353	IHW	0.0995238	ashr	-0.197146	0.113215
DAS30	AT1G23040	234.981	~genotype	Wald	slim1-cr v Col-0	-1.65369	0.0981901	IHW	0.385248	ashr	-0.13792	0.149738
DAS30	AT1G23400	3077.23	~genotype	Wald	slim1-cr v Col-0	-1.08421	0.27827	IHW	0.448573	ashr	-0.0767335	0.0798318
DAS30	AT1G23710	443.721	~genotype	Wald	slim1-cr v Col-0	3.08125	0.00206133	IHW	0.0289609	ashr	0.29022	0.185806
DAS30	AT1G23750	319.519	~genotype	Wald	slim1-cr v Col-0	0.478486	0.632304	IHW	1	ashr	0.0409371	0.112063
DAS30	AT1G23870	1021.15	~genotype	Wald	slim1-cr v Col-0	-2.94076	0.00327408	IHW	0.0329537	ashr	-0.27117	0.153408
DAS30	AT1G23880	181.74	~genotype	Wald	slim1-cr v Col-0	-1.56245	0.118183	IHW	0.413263	ashr	-0.134055	0.112235
DAS30	AT1G24140	248.697	~genotype	Wald	slim1-cr v Col-0	-0.831012	0.405967	IHW	0.833568	ashr	-0.0634295	0.154381
DAS30	AT1G24145	689.011	~genotype	Wald	slim1-cr v Col-0	-1.08929	0.276027	IHW	0.522237	ashr	-0.0804275	0.159009
DAS30	AT1G24150	711.955	~genotype	Wald	slim1-cr v Col-0	-0.918153	0.358539	IHW	0.613889	ashr	-0.0800619	0.125239
DAS30	AT1G24490	1409.03	~genotype	Wald	slim1-cr v Col-0	-1.77661	0.0756316	IHW	0.215782	ashr	-0.151187	0.109476
DAS30	AT1G24530	346.767	~genotype	Wald	slim1-cr v Col-0	-0.879909	0.378908	IHW	0.806571	ashr	-0.0767094	0.124636
DAS30	AT1G24610	1415.92	~genotype	Wald	slim1-cr v Col-0	-0.586146	0.557778	IHW	0.685877	ashr	-0.0467709	0.0958635
DAS30	AT1G25141	68.5847	~genotype	Wald	slim1-cr v Col-0	-4.19063	2.78186e-05	IHW	0.00505598	ashr	-0.618833	0.361025
DAS30	AT1G25277	33.6043	~genotype	Wald	slim1-cr v Col-0	0.57318	0.566523	IHW	1	ashr	0.0423673	0.156135
DAS30	AT1G25290	619.296	~genotype	Wald	slim1-cr v Col-0	1.03857	0.299007	IHW	0.547407	ashr	0.0840426	0.0983235
DAS30	AT1G25370	265.536	~genotype	Wald	slim1-cr v Col-0	1.93217	0.0533388	IHW	0.256934	ashr	0.153939	0.0955625
DAS30	AT1G25400	335.551	~genotype	Wald	slim1-cr v Col-0	0.889015	0.373995	IHW	1	ashr	0.069473	0.152279
DAS30	AT1G25450	1195.92	~genotype	Wald	slim1-cr v Col-0	-3.3335	0.000857616	IHW	0.0137105	ashr	-0.283061	0.108347
DAS30	AT1G25500	398.681	~genotype	Wald	slim1-cr v Col-0	-2.65223	0.00799629	IHW	0.0750257	ashr	-0.227155	0.110605
DAS30	AT1G25520	1170.89	~genotype	Wald	slim1-cr v Col-0	-0.457131	0.647577	IHW	0.742379	ashr	-0.0318277	0.0780747
DAS30	AT1G25560	2493.68	~genotype	Wald	slim1-cr v Col-0	2.86118	0.00422068	IHW	0.0339963	ashr	0.257979	0.191632
DAS30	AT1G26220	936.95	~genotype	Wald	slim1-cr v Col-0	-1.63237	0.102602	IHW	0.301033	ashr	-0.131438	0.0973834
DAS30	AT1G26570	466.988	~genotype	Wald	slim1-cr v Col-0	2.39184	0.016764	IHW	0.0895219	ashr	0.188323	0.0936878
DAS30	AT1G26761	1886.34	~genotype	Wald	slim1-cr v Col-0	-0.844278	0.398514	IHW	0.554206	ashr	-0.0613014	0.0827251
DAS30	AT1G26800	541.193	~genotype	Wald	slim1-cr v Col-0	0.451762	0.651441	IHW	0.924032	ashr	0.0380985	0.139468
DAS30	AT1G26840	203.862	~genotype	Wald	slim1-cr v Col-0	1.79742	0.0722688	IHW	0.322333	ashr	0.156678	0.138839
DAS30	AT1G27090	6075.87	~genotype	Wald	slim1-cr v Col-0	-0.959786	0.337163	IHW	0.521084	ashr	-0.0598059	0.0677738
DAS30	AT1G27100	2199.7	~genotype	Wald	slim1-cr v Col-0	-0.687654	0.491671	IHW	0.63318	ashr	-0.0597785	0.120575
DAS30	AT1G27210	1932.61	~genotype	Wald	slim1-cr v Col-0	-0.323998	0.745939	IHW	0.770216	ashr	-0.0272384	0.106689
DAS30	AT1G27290	1912.54	~genotype	Wald	slim1-cr v Col-0	-2.70121	0.00690883	IHW	0.0458887	ashr	-0.242509	0.130049
DAS30	AT1G27460	1479.26	~genotype	Wald	slim1-cr v Col-0	-0.648222	0.516842	IHW	0.659685	ashr	-0.0536299	0.1028
DAS30	AT1G27580	14.0156	~genotype	Wald	slim1-cr v Col-0	-1.70545	0.0881111	IHW	1	ashr	-0.0959491	0.188836
DAS30	AT1G27730	843.448	~genotype	Wald	slim1-cr v Col-0	0.89328	0.371708	IHW	0.60703	ashr	0.0760174	0.138662
DAS30	AT1G27760	2255.42	~genotype	Wald	slim1-cr v Col-0	-0.883437	0.377	IHW	0.50063	ashr	-0.0752787	0.11048
DAS30	AT1G27950	4748.82	~genotype	Wald	slim1-cr v Col-0	0.177514	0.859105	IHW	0.85314	ashr	0.0149142	0.106535
DAS30	AT1G28010	333.179	~genotype	Wald	slim1-cr v Col-0	0.841332	0.400162	IHW	1	ashr	0.0730745	0.130205
DAS30	AT1G28110	892.451	~genotype	Wald	slim1-cr v Col-0	1.89487	0.0581098	IHW	0.213571	ashr	0.147029	0.0914348
DAS30	AT1G28230	743.521	~genotype	Wald	slim1-cr v Col-0	-0.00353988	0.997176	IHW	1	ashr	-0.000299836	0.108817
DAS30	AT1G28380	2030.26	~genotype	Wald	slim1-cr v Col-0	-2.51404	0.0119357	IHW	0.0666034	ashr	-0.218134	0.114665
DAS30	AT1G28570	207.27	~genotype	Wald	slim1-cr v Col-0	-0.749123	0.453783	IHW	0.88303	ashr	-0.0643874	0.134967
DAS30	AT1G28600	2098.59	~genotype	Wald	slim1-cr v Col-0	1.85434	0.0636907	IHW	0.183542	ashr	0.155287	0.105284
DAS30	AT1G29070	12603.4	~genotype	Wald	slim1-cr v Col-0	-1.09376	0.274059	IHW	0.459836	ashr	-0.0919688	0.106561
DAS30	AT1G29290	28.1063	~genotype	Wald	slim1-cr v Col-0	-1.31323	0.189106	IHW	1	ashr	-0.098276	0.159977
DAS30	AT1G29340	2267	~genotype	Wald	slim1-cr v Col-0	-2.40308	0.0162578	IHW	0.0789143	ashr	-0.144926	0.0651731
DAS30	AT1G29440	190.8	~genotype	Wald	slim1-cr v Col-0	-2.02825	0.0425351	IHW	0.224843	ashr	-0.167398	0.160086
DAS30	AT1G29690	932.474	~genotype	Wald	slim1-cr v Col-0	0.22402	0.822742	IHW	0.912923	ashr	0.0185563	0.1031
DAS30	AT1G29910	279539	~genotype	Wald	slim1-cr v Col-0	-0.89647	0.370002	IHW	0.549262	ashr	-0.0770547	0.113607
DAS30	AT1G29970	939.81	~genotype	Wald	slim1-cr v Col-0	-2.21914	0.0264773	IHW	0.128079	ashr	-0.190263	0.11128
DAS30	AT1G30220	51.7567	~genotype	Wald	slim1-cr v Col-0	-0.500582	0.616666	IHW	1	ashr	-0.0322081	0.164561
DAS30	AT1G30380	62218.7	~genotype	Wald	slim1-cr v Col-0	1.28872	0.197495	IHW	0.379926	ashr	0.111663	0.116703
DAS30	AT1G30400	7461.11	~genotype	Wald	slim1-cr v Col-0	-1.2798	0.200616	IHW	0.393931	ashr	-0.0949309	0.0853191
DAS30	AT1G30475	238.271	~genotype	Wald	slim1-cr v Col-0	1.57726	0.114735	IHW	0.408754	ashr	0.135029	0.111479
DAS30	AT1G30520	1775.75	~genotype	Wald	slim1-cr v Col-0	-2.10601	0.0352033	IHW	0.134532	ashr	-0.176035	0.104775
DAS30	AT1G30690	3190.43	~genotype	Wald	slim1-cr v Col-0	0.914752	0.360322	IHW	0.568478	ashr	0.0794586	0.119173
DAS30	AT1G30755	660.54	~genotype	Wald	slim1-cr v Col-0	1.34921	0.177269	IHW	0.410274	ashr	0.118011	0.128246
DAS30	AT1G30810	1036.69	~genotype	Wald	slim1-cr v Col-0	-2.15659	0.0310377	IHW	0.142055	ashr	-0.143682	0.0737273
DAS30	AT1G30970	1920.3	~genotype	Wald	slim1-cr v Col-0	-1.35475	0.175496	IHW	0.32028	ashr	-0.0971393	0.0812871
DAS30	AT1G31130	3130.73	~genotype	Wald	slim1-cr v Col-0	-2.12977	0.0331902	IHW	0.123665	ashr	-0.178176	0.104966
DAS30	AT1G31690	1486.55	~genotype	Wald	slim1-cr v Col-0	0.287053	0.774071	IHW	0.811586	ashr	0.0242154	0.139135
DAS30	AT1G31820	430.133	~genotype	Wald	slim1-cr v Col-0	-0.62732	0.53045	IHW	0.761519	ashr	-0.0530941	0.13906
DAS30	AT1G31860	985.262	~genotype	Wald	slim1-cr v Col-0	1.026	0.304891	IHW	0.568478	ashr	0.0869344	0.10868
DAS30	AT1G32170	164.781	~genotype	Wald	slim1-cr v Col-0	-3.09435	0.00197246	IHW	0.0323997	ashr	-0.289394	0.158602
DAS30	AT1G32200	3966.11	~genotype	Wald	slim1-cr v Col-0	-1.90249	0.0571073	IHW	0.1509	ashr	-0.13766	0.0823494
DAS30	AT1G32350	192.031	~genotype	Wald	slim1-cr v Col-0	-1.07837	0.28087	IHW	0.671349	ashr	-0.0613517	0.174278
DAS30	AT1G32470	14293.8	~genotype	Wald	slim1-cr v Col-0	2.93311	0.00335588	IHW	0.0298876	ashr	0.247141	0.106464
DAS30	AT1G32530	1565.26	~genotype	Wald	slim1-cr v Col-0	-0.371691	0.710123	IHW	0.777563	ashr	-0.0284833	0.0896332
DAS30	AT1G32550	2021.85	~genotype	Wald	slim1-cr v Col-0	0.982294	0.325955	IHW	0.459671	ashr	0.0792532	0.0977853
DAS30	AT1G32990	9842.14	~genotype	Wald	slim1-cr v Col-0	-2.46233	0.0138038	IHW	0.0726972	ashr	-0.194046	0.0938368
DAS30	AT1G33030	108.044	~genotype	Wald	slim1-cr v Col-0	-1.06381	0.287414	IHW	1	ashr	-0.0790559	0.15825
DAS30	AT1G33040	2870.59	~genotype	Wald	slim1-cr v Col-0	-0.664373	0.506452	IHW	0.554762	ashr	-0.0443233	0.0738193
DAS30	AT1G33050	2277.82	~genotype	Wald	slim1-cr v Col-0	-0.529604	0.596387	IHW	0.677577	ashr	-0.044393	0.105899
DAS30	AT1G33080	435.881	~genotype	Wald	slim1-cr v Col-0	1.98913	0.0466865	IHW	0.205024	ashr	0.164643	0.102656
DAS30	AT1G33102	46.3402	~genotype	Wald	slim1-cr v Col-0	-0.473919	0.635557	IHW	1	ashr	-0.0333832	0.159316
DAS30	AT1G33110	1731.34	~genotype	Wald	slim1-cr v Col-0	0.163506	0.87012	IHW	0.85808	ashr	0.013673	0.105338
DAS30	AT1G33290	1416.37	~genotype	Wald	slim1-cr v Col-0	0.00718344	0.994268	IHW	0.922187	ashr	0.000525096	0.0835192
DAS30	AT1G33980	1912.61	~genotype	Wald	slim1-cr v Col-0	-0.793143	0.427695	IHW	0.587896	ashr	-0.045791	0.0618616
DAS30	AT1G34060	172.194	~genotype	Wald	slim1-cr v Col-0	1.59381	0.110978	IHW	0.414605	ashr	0.124168	0.159504
DAS30	AT1G34180	177.979	~genotype	Wald	slim1-cr v Col-0	-0.0147429	0.988237	IHW	1	ashr	-0.00107778	0.156107
DAS30	AT1G34260	1461.81	~genotype	Wald	slim1-cr v Col-0	-3.30665	0.00094418	IHW	0.0127837	ashr	-0.253108	0.0897859
DAS30	AT1G34300	1010.91	~genotype	Wald	slim1-cr v Col-0	-0.694301	0.487493	IHW	0.716101	ashr	-0.0513414	0.0849274
DAS30	AT1G35140	136.141	~genotype	Wald	slim1-cr v Col-0	-2.36764	0.0179019	IHW	0.134388	ashr	-0.191322	0.182132
DAS30	AT1G35210	195.142	~genotype	Wald	slim1-cr v Col-0	1.11976	0.262816	IHW	0.652614	ashr	0.0794775	0.162412
DAS30	AT1G35350	867.839	~genotype	Wald	slim1-cr v Col-0	-2.73203	0.00629458	IHW	0.0516113	ashr	-0.243833	0.125822
DAS30	AT1G35420	3229.37	~genotype	Wald	slim1-cr v Col-0	3.06442	0.00218093	IHW	0.0237235	ashr	0.26854	0.117011
DAS30	AT1G35680	17271.7	~genotype	Wald	slim1-cr v Col-0	-1.29102	0.196696	IHW	0.37944	ashr	-0.101057	0.0927476
DAS30	AT1G41830	4038.41	~genotype	Wald	slim1-cr v Col-0	-1.02525	0.305246	IHW	0.473693	ashr	-0.0810119	0.0942316
DAS30	AT1G42970	84586.3	~genotype	Wald	slim1-cr v Col-0	2.12748	0.0333804	IHW	0.129169	ashr	0.180687	0.108684
DAS30	AT1G42990	1731.52	~genotype	Wald	slim1-cr v Col-0	3.44572	0.000569535	IHW	0.00884853	ashr	0.317125	0.13484
DAS30	AT1G43560	3912.82	~genotype	Wald	slim1-cr v Col-0	-0.124486	0.90093	IHW	0.751539	ashr	-0.00910085	0.0835343
DAS30	AT1G43700	1665.24	~genotype	Wald	slim1-cr v Col-0	1.28284	0.199548	IHW	0.384481	ashr	0.108487	0.108015
DAS30	AT1G44000	5570.73	~genotype	Wald	slim1-cr v Col-0	0.237888	0.811968	IHW	0.84567	ashr	0.0147605	0.0674195
DAS30	AT1G44446	16129.1	~genotype	Wald	slim1-cr v Col-0	-2.91075	0.00360559	IHW	0.0315139	ashr	-0.188161	0.0710044
DAS30	AT1G44575	70796.3	~genotype	Wald	slim1-cr v Col-0	-0.489837	0.624249	IHW	0.724633	ashr	-0.0409689	0.10535
DAS30	AT1G44770	1839.45	~genotype	Wald	slim1-cr v Col-0	-1.32404	0.18549	IHW	0.37827	ashr	-0.115144	0.118689
DAS30	AT1G44920	3656.84	~genotype	Wald	slim1-cr v Col-0	-1.79772	0.072221	IHW	0.206127	ashr	-0.133631	0.0856002
DAS30	AT1G45150	645.903	~genotype	Wald	slim1-cr v Col-0	-0.307581	0.758401	IHW	0.892982	ashr	-0.0214092	0.0780443
DAS30	AT1G45207	634.159	~genotype	Wald	slim1-cr v Col-0	2.43502	0.0148909	IHW	0.0900628	ashr	0.174864	0.0815219
DAS30	AT1G47210	705.298	~genotype	Wald	slim1-cr v Col-0	2.86926	0.00411429	IHW	0.0387804	ashr	0.237256	0.102424
DAS30	AT1G47290	736.677	~genotype	Wald	slim1-cr v Col-0	0.904565	0.365696	IHW	0.620481	ashr	0.0611112	0.0750322
DAS30	AT1G47655	126.129	~genotype	Wald	slim1-cr v Col-0	-0.0782317	0.937644	IHW	1	ashr	-0.00679849	0.121567
DAS30	AT1G48000	40.6691	~genotype	Wald	slim1-cr v Col-0	0.0457357	0.963521	IHW	1	ashr	0.00262884	0.168547
DAS30	AT1G48350	14608.1	~genotype	Wald	slim1-cr v Col-0	2.6279	0.00859137	IHW	0.0549033	ashr	0.209464	0.0956954
DAS30	AT1G48430	1588.95	~genotype	Wald	slim1-cr v Col-0	-0.426907	0.669447	IHW	0.755052	ashr	-0.0347763	0.0996185
DAS30	AT1G48480	2479.06	~genotype	Wald	slim1-cr v Col-0	-1.79609	0.0724805	IHW	0.206411	ashr	-0.12268	0.0761367
DAS30	AT1G48490	1844.3	~genotype	Wald	slim1-cr v Col-0	-0.881248	0.378184	IHW	0.566114	ashr	-0.0731925	0.103634
DAS30	AT1G48520	3233.12	~genotype	Wald	slim1-cr v Col-0	1.89405	0.0582182	IHW	0.176123	ashr	0.14034	0.0852025
DAS30	AT1G48950	761.636	~genotype	Wald	slim1-cr v Col-0	-0.689259	0.49066	IHW	0.710775	ashr	-0.0543935	0.094035
DAS30	AT1G49360	463.062	~genotype	Wald	slim1-cr v Col-0	-0.0206792	0.983502	IHW	1	ashr	-0.00168265	0.0994098
DAS30	AT1G49380	2733.1	~genotype	Wald	slim1-cr v Col-0	-1.03891	0.298845	IHW	0.407652	ashr	-0.0851776	0.100844
DAS30	AT1G49580	1029.54	~genotype	Wald	slim1-cr v Col-0	-0.0219969	0.98245	IHW	1	ashr	-0.00183221	0.104383
DAS30	AT1G49730	1764.32	~genotype	Wald	slim1-cr v Col-0	0.893098	0.371805	IHW	0.561389	ashr	0.0698809	0.0926923
DAS30	AT1G50570	1506.24	~genotype	Wald	slim1-cr v Col-0	0.866656	0.386131	IHW	0.572729	ashr	0.0571559	0.0727402
DAS30	AT1G50575	700.877	~genotype	Wald	slim1-cr v Col-0	0.680527	0.496171	IHW	0.734427	ashr	0.0546721	0.0970376
DAS30	AT1G50710	817.918	~genotype	Wald	slim1-cr v Col-0	2.50712	0.0121719	IHW	0.0763191	ashr	0.160841	0.0702991
[truncated: 15,277 more rows]

[truncated: 8 more sheets: Figure S2a, Figure S2f, Figure S4a, Figure S4b, Figure S4c, Figure S4d, Figure S4e, Figure S4f]
