# Supplementary material for: Overexpression of SLIM1 transcription factor accelerates vegetative development in Arabidopsis thaliana
Source: Front Plant Sci. 2024 Mar 20;15:1327152. doi: 10.3389/fpls.2024.1327152 (PMC10988502; doi:10.3389/fpls.2024.1327152)
Supplement: Supplementary file 7 [file Table_2.xlsx]

## Sheet: legend
	description	details
&	AND
|	OR
&|	AND/OR
DE	differentially expresssed relative to Col-0 at same timepoint	padj < 0.05
up	upregulated relative to Col-0 at same timepoint	log2FC > 0
down	downregulated relative to Col-0 at same timepoint	in contrast with Col-0 at same timepoint, log2FC < 0
35S::SLIM1 UP & slim1-cr DOWN	class1: positively regulated by SLIM1	two sets of criteria must both be met: 1) must be DE in 35S::SLIM1 #17 & DE in 35S::SLIM1 #25 & DE in slim1-cr AND 2) must be up in 35S::SLIM1 #17 & up in 35S::SLIM1 #25 & down slim1-cr
35S::SLIM1 DOWN & slim1-cr UP	class1: negatively regulated by SLIM1	two sets of criteria must both be met: 1) must be DE in 35S::SLIM1 #17 & DE in 35S::SLIM1 #25 & DE in slim1-cr AND 2) must be down in 35S::SLIM1 #17 & down in 35S::SLIM1 #25 & up slim1-cr

## Sheet: class1 set analysis
timepoint	30DAS	30DAS	37DAS	37DAS	44DAS	44DAS	37DAS & 44DAS	30DAS &| 37DAS &| 44DAS	30DAS &| 37DAS &| 44DAS
class1 type	35S::SLIM1 UP & slim1-cr DOWN	35S::SLIM1 DOWN & slim1-cr UP	35S::SLIM1 UP & slim1-cr DOWN	35S::SLIM1 DOWN & slim1-cr UP	35S::SLIM1 UP & slim1-cr DOWN	35S::SLIM1 DOWN & slim1-cr UP	35S::SLIM1 UP & slim1-cr DOWN	35S::SLIM1 UP & slim1-cr DOWN	35S::SLIM1 DOWN & slim1-cr UP
		AT1G68840	AT1G01240	AT1G05560	AT1G01355	AT1G01620	AT1G13210	AT1G01240	AT1G68840
			AT1G01560	AT1G08280	AT1G01500	AT1G01970	AT1G73810	AT1G01560	AT1G05560
			AT1G02390	AT1G16020	AT1G01550	AT1G02640	AT1G78420	AT1G02390	AT1G08280
			AT1G02610	AT1G21740	AT1G02460	AT1G03600	AT1G80160	AT1G02610	AT1G16020
			AT1G02660	AT1G55690	AT1G02470	AT1G03630	AT2G15480	AT1G02660	AT1G21740
			AT1G03370	AT1G64780	AT1G02740	AT1G04250	AT2G19130	AT1G03370	AT1G55690
			AT1G03730	AT1G68640	AT1G02850	AT1G04420	AT2G46620	AT1G03730	AT1G64780
			AT1G03740	AT1G74720	AT1G03200	AT1G04680	AT3G08760	AT1G03740	AT1G68640
			AT1G04280	AT1G75120	AT1G03495	AT1G04800	AT3G17700	AT1G04280	AT1G74720
			AT1G04400	AT2G36530	AT1G03550	AT1G04820	AT3G19580	AT1G04400	AT1G75120
			AT1G06050	AT2G42250	AT1G03940	AT1G04920	AT3G25610	AT1G06050	AT2G36530
			AT1G07000	AT3G12915	AT1G04070	AT1G04940	AT3G46930	AT1G07000	AT2G42250
			AT1G07135	AT3G23210	AT1G04570	AT1G05190	AT3G54150	AT1G07135	AT3G12915
			AT1G07530	AT3G25590	AT1G04970	AT1G05210	AT4G01010	AT1G07530	AT3G23210
			AT1G09560	AT3G52890	AT1G05060	AT1G05850	AT4G18880	AT1G09560	AT3G25590
			AT1G09645	AT4G12310	AT1G05570	AT1G06190	AT4G23450	AT1G09645	AT3G52890
			AT1G10140	AT4G20270	AT1G05575	AT1G06360	AT4G33050	AT1G10140	AT4G12310
			AT1G10150	AT4G21760	AT1G05783	AT1G07320	AT4G33920	AT1G10150	AT4G20270
			AT1G12220	AT4G22490	AT1G06780	AT1G07570	AT4G39580	AT1G12220	AT4G21760
			AT1G12360	AT5G03670	AT1G07620	AT1G07820	AT5G04340	AT1G12360	AT4G22490
			AT1G12450	AT5G24990	AT1G07630	AT1G08520	AT5G07100	AT1G12450	AT5G03670
			AT1G12970	AT5G26160	AT1G07900	AT1G08540	AT5G39030	AT1G12970	AT5G24990
			AT1G12990	AT5G38940	AT1G08620	AT1G09580	AT5G42050	AT1G12990	AT5G26160
			AT1G13210	AT5G46830	AT1G09230	AT1G09750		AT1G13210	AT5G38940
			AT1G13260	AT5G67200	AT1G09480	AT1G10030		AT1G13260	AT5G46830
			AT1G13520	AT5G67280	AT1G11210	AT1G10120		AT1G13520	AT5G67200
			AT1G14200		AT1G12290	AT1G10657		AT1G14200	AT5G67280
			AT1G14370		AT1G12940	AT1G10670		AT1G14370	AT1G01620
			AT1G14400		AT1G13210	AT1G10960		AT1G14400	AT1G01970
			AT1G14870		AT1G13830	AT1G11000		AT1G14870	AT1G02640
			AT1G15530		AT1G15780	AT1G11303		AT1G15530	AT1G03600
			AT1G15890		AT1G16540	AT1G11545		AT1G15890	AT1G03630
			AT1G16110		AT1G17370	AT1G11850		AT1G16110	AT1G04250
			AT1G16670		AT1G17440	AT1G11860		AT1G16670	AT1G04420
			AT1G17600		AT1G17550	AT1G11870		AT1G17600	AT1G04680
			AT1G18390		AT1G18470	AT1G12080		AT1G18390	AT1G04800
			AT1G18570		AT1G18750	AT1G12310		AT1G18570	AT1G04820
			AT1G18890		AT1G18860	AT1G12460		AT1G18890	AT1G04920
			AT1G19020		AT1G18900	AT1G12770		AT1G19020	AT1G04940
			AT1G19270		AT1G19200	AT1G12800		AT1G19270	AT1G05190
			AT1G20840		AT1G19210	AT1G12900		AT1G20840	AT1G05210
			AT1G21000		AT1G20980	AT1G13170		AT1G21000	AT1G05850
			AT1G21450		AT1G23040	AT1G13250		AT1G21450	AT1G06190
			AT1G21830		AT1G24490	AT1G13570		AT1G21830	AT1G06360
			AT1G21910		AT1G25141	AT1G14190		AT1G21910	AT1G07320
			AT1G22280		AT1G25277	AT1G14270		AT1G22280	AT1G07570
			AT1G22570		AT1G25370	AT1G14290		AT1G22570	AT1G07820
			AT1G22890		AT1G25500	AT1G14345		AT1G22890	AT1G08520
			AT1G22930		AT1G25520	AT1G14700		AT1G22930	AT1G08540
			AT1G23710		AT1G27580	AT1G15180		AT1G23710	AT1G09580
			AT1G23870		AT1G27760	AT1G15570		AT1G23870	AT1G09750
			AT1G24140		AT1G28230	AT1G15690		AT1G24140	AT1G10030
			AT1G24145		AT1G28570	AT1G15820		AT1G24145	AT1G10120
			AT1G24150		AT1G28600	AT1G15830		AT1G24150	AT1G10657
			AT1G24530		AT1G30220	AT1G15825		AT1G24530	AT1G10670
			AT1G25400		AT1G30400	AT1G15910		AT1G25400	AT1G10960
			AT1G25560		AT1G30475	AT1G15970		AT1G25560	AT1G11000
			AT1G26800		AT1G30810	AT1G16390		AT1G26800	AT1G11303
			AT1G27100		AT1G30970	AT1G16920		AT1G27100	AT1G11545
			AT1G27290		AT1G31820	AT1G17650		AT1G27290	AT1G11850
			AT1G27730		AT1G32350	AT1G18440		AT1G27730	AT1G11860
			AT1G28380		AT1G33030	AT1G18620		AT1G28380	AT1G11870
			AT1G29290		AT1G33102	AT1G19950		AT1G29290	AT1G12080
			AT1G29340		AT1G33110	AT1G20810		AT1G29340	AT1G12310
			AT1G29690		AT1G33980	AT1G21070		AT1G29690	AT1G12460
			AT1G29970		AT1G34060	AT1G21880		AT1G29970	AT1G12770
			AT1G30755		AT1G34260	AT1G22170		AT1G30755	AT1G12800
			AT1G31130		AT1G45150	AT1G22800		AT1G31130	AT1G12900
			AT1G32170		AT1G48000	AT1G23400		AT1G32170	AT1G13170
			AT1G32530		AT1G48430	AT1G23750		AT1G32530	AT1G13250
			AT1G33050		AT1G48490	AT1G23880		AT1G33050	AT1G13570
			AT1G34180		AT1G49360	AT1G24610		AT1G34180	AT1G14190
			AT1G34300		AT1G50570	AT1G25290		AT1G34300	AT1G14270
			AT1G35140		AT1G51660	AT1G25450		AT1G35140	AT1G14290
			AT1G35210		AT1G52000	AT1G26220		AT1G35210	AT1G14345
			AT1G35350		AT1G53780	AT1G26570		AT1G35350	AT1G14700
			AT1G42990		AT1G53910	AT1G26761		AT1G42990	AT1G15180
			AT1G43700		AT1G54100	AT1G26840		AT1G43700	AT1G15570
			AT1G44770		AT1G54575	AT1G27090		AT1G44770	AT1G15690
			AT1G53100		AT1G55110	AT1G27210		AT1G53100	AT1G15820
			AT1G53430		AT1G55265	AT1G27460		AT1G53430	AT1G15830
			AT1G54090		AT1G55730	AT1G27950		AT1G54090	AT1G15825
			AT1G54130		AT1G56010	AT1G28010		AT1G54130	AT1G15910
			AT1G54210		AT1G56140	AT1G28110		AT1G54210	AT1G15970
			AT1G56460		AT1G56145	AT1G29070		AT1G56460	AT1G16390
			AT1G58420		AT1G56280	AT1G29440		AT1G58420	AT1G16920
			AT1G59590		AT1G56650	AT1G29910		AT1G59590	AT1G17650
			AT1G59620		AT1G57590	AT1G30380		AT1G59620	AT1G18440
			AT1G62422		AT1G58235	AT1G30520		AT1G62422	AT1G18620
			AT1G63350		AT1G59910	AT1G30690		AT1G63350	AT1G19950
			AT1G64065		AT1G60730	AT1G31690		AT1G64065	AT1G20810
			AT1G64280		AT1G60900	AT1G31860		AT1G64280	AT1G21070
			AT1G64610		AT1G61800	AT1G32200		AT1G64610	AT1G21880
			AT1G65250		AT1G62810	AT1G32470		AT1G65250	AT1G22170
			AT1G66090		AT1G63010	AT1G32550		AT1G66090	AT1G22800
			AT1G67920		AT1G63370	AT1G32990		AT1G67920	AT1G23400
			AT1G68000		AT1G63840	AT1G33040		AT1G68000	AT1G23750
			AT1G68520		AT1G64840	AT1G33080		AT1G68520	AT1G23880
			AT1G68690		AT1G64950	AT1G33290		AT1G68690	AT1G24610
			AT1G69270		AT1G64970	AT1G35420		AT1G69270	AT1G25290
			AT1G69490		AT1G65690	AT1G35680		AT1G69490	AT1G25450
			AT1G69840		AT1G65790	AT1G41830		AT1G69840	AT1G26220
			AT1G69890		AT1G65820	AT1G42970		AT1G69890	AT1G26570
			AT1G69900		AT1G67650	AT1G43560		AT1G69900	AT1G26761
			AT1G70290		AT1G69310	AT1G44000		AT1G70290	AT1G26840
			AT1G70520		AT1G69450	AT1G44446		AT1G70520	AT1G27090
			AT1G70530		AT1G69480	AT1G44575		AT1G70530	AT1G27210
			AT1G72150		AT1G69640	AT1G44920		AT1G72150	AT1G27460
			AT1G72900		AT1G69810	AT1G45207		AT1G72900	AT1G27950
			AT1G72930		AT1G69870	AT1G47210		AT1G72930	AT1G28010
			AT1G73500		AT1G71040	AT1G47290		AT1G73500	AT1G28110
			AT1G73810		AT1G71800	AT1G47655		AT1G73810	AT1G29070
			AT1G74940		AT1G71910	AT1G48350		AT1G74940	AT1G29440
			AT1G75020		AT1G72800	AT1G48480		AT1G75020	AT1G29910
			AT1G75380		AT1G72840	AT1G48520		AT1G75380	AT1G30380
			AT1G76360		AT1G73040	AT1G48950		AT1G76360	AT1G30520
			AT1G77500		AT1G73130	AT1G49380		AT1G77500	AT1G30690
			AT1G77640		AT1G73700	AT1G49580		AT1G77640	AT1G31690
			AT1G78420		AT1G73810	AT1G49730		AT1G78420	AT1G31860
			AT1G79380		AT1G74010	AT1G50575		AT1G79380	AT1G32200
			AT1G80160		AT1G74020	AT1G50710		AT1G80160	AT1G32470
			AT1G80180		AT1G74810	AT1G50732		AT1G80180	AT1G32550
			AT1G80510		AT1G76520	AT1G51400		AT1G80510	AT1G32990
			AT1G80610		AT1G76820	AT1G52230		AT1G80610	AT1G33040
			AT1G80840		AT1G76955	AT1G52340		AT1G80840	AT1G33080
			AT2G01450		AT1G77920	AT1G52670		AT2G01450	AT1G33290
			AT2G01850		AT1G78190	AT1G53250		AT2G01850	AT1G35420
			AT2G02710		AT1G78420	AT1G53290		AT2G02710	AT1G35680
			AT2G02950		AT1G78670	AT1G53300		AT2G02950	AT1G41830
			AT2G03530		AT1G78780	AT1G54820		AT2G03530	AT1G42970
			AT2G04495		AT1G79270	AT1G55260		AT2G04495	AT1G43560
			AT2G14080		AT1G79610	AT1G55370		AT2G14080	AT1G44000
			AT2G15042		AT1G80010	AT1G55490		AT2G15042	AT1G44446
			AT2G15390		AT1G80160	AT1G55805		AT2G15390	AT1G44575
			AT2G15480		AT1G80300	AT1G56190		AT2G15480	AT1G44920
			AT2G17040		AT1G80910	AT1G59560		AT2G17040	AT1G45207
			AT2G17705		AT2G01600	AT1G59840		AT2G17705	AT1G47210
			AT2G17787		AT2G02370	AT1G60550		AT2G17787	AT1G47290
			AT2G18670		AT2G02390	AT1G60600		AT2G18670	AT1G47655
			AT2G18700		AT2G07718	AT1G60790		AT2G18700	AT1G48350
			AT2G19130		AT2G11520	AT1G60950		AT2G19130	AT1G48480
			AT2G19710		AT2G15480	AT1G61170		AT2G19710	AT1G48520
			AT2G20142		AT2G17290	AT1G62480		AT2G20142	AT1G48950
			AT2G22300		AT2G17500	AT1G63110		AT2G22300	AT1G49380
			AT2G23810		AT2G17760	AT1G64150		AT2G23810	AT1G49580
			AT2G24240		AT2G18950	AT1G64355		AT2G24240	AT1G49730
			AT2G24550		AT2G19130	AT1G64510		AT2G24550	AT1G50575
			AT2G25200		AT2G20310	AT1G64670		AT2G25200	AT1G50710
			AT2G26560		AT2G20560	AT1G64860		AT2G26560	AT1G50732
			AT2G27500		AT2G20900	AT1G65010		AT2G27500	AT1G51400
			AT2G28110		AT2G20960	AT1G66050		AT2G28110	AT1G52230
			AT2G28120		AT2G21500	AT1G66190		AT2G28120	AT1G52340
			AT2G30250		AT2G21620	AT1G66430		AT2G30250	AT1G52670
			AT2G30440		AT2G26230	AT1G67090		AT2G30440	AT1G53250
			AT2G31800		AT2G27090	AT1G67180		AT2G31800	AT1G53290
			AT2G31880		AT2G28400	AT1G67700		AT2G31880	AT1G53300
			AT2G31945		AT2G28500	AT1G67830		AT2G31945	AT1G54820
			AT2G32140		AT2G29350	AT1G67910		AT2G32140	AT1G55260
			AT2G32200		AT2G30020	AT1G68060		AT2G32200	AT1G55370
			AT2G32800		AT2G30840	AT1G68110		AT2G32800	AT1G55490
			AT2G33580		AT2G31990	AT1G68190		AT2G33580	AT1G55805
			AT2G34500		AT2G32660	AT1G68890		AT2G34500	AT1G56190
			AT2G35930		AT2G32830	AT1G69420		AT2G35930	AT1G59560
			AT2G36220		AT2G33080	AT1G69700		AT2G36220	AT1G59840
			AT2G36770		AT2G33150	AT1G69830		AT2G36770	AT1G60550
			AT2G36780		AT2G33730	AT1G70150		AT2G36780	AT1G60600
			AT2G38470		AT2G34660	AT1G70370		AT2G38470	AT1G60790
			AT2G38790		AT2G35510	AT1G70710		AT2G38790	AT1G60950
			AT2G39400		AT2G35550	AT1G71020		AT2G39400	AT1G61170
			AT2G39980		AT2G35940	AT1G71790		AT2G39980	AT1G62480
			AT2G40000		AT2G36580	AT1G72170		AT2G40000	AT1G63110
			AT2G40270		AT2G37410	AT1G72410		AT2G40270	AT1G64150
			AT2G41100		AT2G38340	AT1G72640		AT2G41100	AT1G64355
			AT2G41410		AT2G38800	AT1G73060		AT2G41410	AT1G64510
			AT2G41640		AT2G39050	AT1G73655		AT2G41640	AT1G64670
			AT2G41835		AT2G39260	AT1G74470		AT2G41835	AT1G64860
			AT2G43060		AT2G39480	AT1G74690		AT2G43060	AT1G65010
			AT2G43120		AT2G39710	AT1G74790		AT2G43120	AT1G66050
			AT2G44080		AT2G40950	AT1G74970		AT2G44080	AT1G66190
			AT2G44500		AT2G41210	AT1G75030		AT2G44500	AT1G66430
			AT2G45170		AT2G41380	AT1G75350		AT2G45170	AT1G67090
			AT2G46500		AT2G42350	AT1G75680		AT2G46500	AT1G67180
			AT2G46620		AT2G42760	AT1G75690		AT2G46620	AT1G67700
			AT2G47730		AT2G44280	AT1G76110		AT2G47730	AT1G67830
			AT3G01290		AT2G44480	AT1G76405		AT3G01290	AT1G67910
			AT3G01830		AT2G44520	AT1G76450		AT3G01830	AT1G68060
			AT3G02170		AT2G44578	AT1G76710		AT3G02170	AT1G68110
			AT3G02800		AT2G44750	AT1G76870		AT3G02800	AT1G68190
			AT3G02840		AT2G44990	AT1G77090		AT3G02840	AT1G68890
			AT3G03000		AT2G45510	AT1G77590		AT3G03000	AT1G69420
			AT3G04060		AT2G46430	AT1G78180		AT3G04060	AT1G69700
			AT3G04220		AT2G46620	AT1G78260		AT3G04220	AT1G69830
			AT3G04640		AT2G46680	AT1G78430		AT3G04640	AT1G70150
			AT3G04930		AT2G47190	AT1G78630		AT3G04930	AT1G70370
			AT3G05200		AT3G02875	AT1G78915		AT3G05200	AT1G70710
			AT3G05320		AT3G03470	AT1G79500		AT3G05320	AT1G71020
			AT3G06080		AT3G04240	AT1G79700		AT3G06080	AT1G71790
			AT3G07195		AT3G04420	AT1G79850		AT3G07195	AT1G72170
			AT3G07780		AT3G05360	AT1G80030		AT3G07780	AT1G72410
			AT3G08760		AT3G05380	AT1G80080		AT3G08760	AT1G72640
			AT3G08860		AT3G05937	AT1G80350		AT3G08860	AT1G73060
			AT3G09020		AT3G06170	AT1G80690		AT3G09020	AT1G73655
			AT3G10640		AT3G06860	AT2G01755		AT3G10640	AT1G74470
			AT3G10930		AT3G07600	AT2G01818		AT3G10930	AT1G74690
			AT3G11640		AT3G08690	AT2G01820		AT3G11640	AT1G74790
			AT3G11820		AT3G08760	AT2G02130		AT3G11820	AT1G74970
			AT3G11840		AT3G09440	AT2G02170		AT3G11840	AT1G75030
			AT3G11850		AT3G09830	AT2G02410		AT3G11850	AT1G75350
			AT3G12360		AT3G10320	AT2G02500		AT3G12360	AT1G75680
			AT3G12740		AT3G10480	AT2G03280		AT3G12740	AT1G75690
			AT3G13062		AT3G10490	AT2G03350		AT3G13062	AT1G76110
			AT3G13310		AT3G10500	AT2G03420		AT3G13310	AT1G76405
			AT3G13430		AT3G11080	AT2G04780		AT3G13430	AT1G76450
			AT3G13720		AT3G11150	AT2G05210		AT3G13720	AT1G76710
			AT3G14050		AT3G11410	AT2G05790		AT3G14050	AT1G76870
			AT3G14090		AT3G12580	AT2G05990		AT3G14090	AT1G77090
			AT3G14620		AT3G13229	AT2G06850		AT3G14620	AT1G77590
			AT3G15500		AT3G14070	AT2G07050		AT3G15500	AT1G78180
			AT3G15518		AT3G14230	AT2G10940		AT3G15518	AT1G78260
			AT3G15820		AT3G14280	AT2G13820		AT3G15820	AT1G78430
			AT3G16510		AT3G14440	AT2G14890		AT3G16510	AT1G78630
			AT3G16720		AT3G14700	AT2G15280		AT3G16720	AT1G78915
			AT3G17700		AT3G15353	AT2G16390		AT3G17700	AT1G79500
			AT3G18560		AT3G15880	AT2G16630		AT3G18560	AT1G79700
			AT3G19010		AT3G16860	AT2G16750		AT3G19010	AT1G79850
			AT3G19030		AT3G16910	AT2G17370		AT3G19030	AT1G80030
			AT3G19290		AT3G16990	AT2G17780		AT3G19290	AT1G80080
			AT3G19580		AT3G17700	AT2G17800		AT3G19580	AT1G80350
			AT3G20410		AT3G17790	AT2G17972		AT3G20410	AT1G80690
			AT3G21780		AT3G17800	AT2G18400		AT3G21780	AT2G01755
			AT3G22930		AT3G17810	AT2G18990		AT3G22930	AT2G01818
			AT3G23030		AT3G19580	AT2G19940		AT3G23030	AT2G01820
			AT3G25070		AT3G19660	AT2G20240		AT3G25070	AT2G02130
			AT3G25510		AT3G20250	AT2G20250		AT3G25510	AT2G02170
			AT3G25600		AT3G22330	AT2G20360		AT3G25600	AT2G02410
			AT3G25610		AT3G22460	AT2G20890		AT3G25610	AT2G02500
			AT3G26200		AT3G24929	AT2G20990		AT3G26200	AT2G03280
			AT3G26220		AT3G25610	AT2G21170		AT3G26220	AT2G03350
			AT3G26510		AT3G26280	AT2G21280		AT3G26510	AT2G03420
			AT3G26910		AT3G26590	AT2G21330		AT3G26910	AT2G04780
			AT3G27560		AT3G26840	AT2G21385		AT3G27560	AT2G05210
			AT3G28210		AT3G27260	AT2G21530		AT3G28210	AT2G05790
			AT3G28340		AT3G27820	AT2G21540		AT3G28340	AT2G05990
			AT3G28450		AT3G28580	AT2G22230		AT3G28450	AT2G06850
			AT3G44400		AT3G28950	AT2G22670		AT3G44400	AT2G07050
			AT3G45040		AT3G30390	AT2G23380		AT3G45040	AT2G10940
			AT3G45640		AT3G44670	AT2G23820		AT3G45640	AT2G13820
			AT3G45730		AT3G45650	AT2G24020		AT3G45730	AT2G14890
			AT3G46090		AT3G46530	AT2G24090		AT3G46090	AT2G15280
			AT3G46930		AT3G46730	AT2G24150		AT3G46930	AT2G16390
			AT3G47160		AT3G46920	AT2G24350		AT3G47160	AT2G16630
			AT3G47550		AT3G46930	AT2G24395		AT3G47550	AT2G16750
			AT3G47800		AT3G48020	AT2G24610		AT3G47800	AT2G17370
			AT3G47820		AT3G49210	AT2G25830		AT3G47820	AT2G17780
			AT3G49530		AT3G50910	AT2G25840		AT3G49530	AT2G17800
			AT3G49790		AT3G51070	AT2G25870		AT3G49790	AT2G17972
			AT3G49800		AT3G51960	AT2G26260		AT3G49800	AT2G18400
			AT3G50470		AT3G52710	AT2G26550		AT3G50470	AT2G18990
			AT3G50930		AT3G52800	AT2G27130		AT3G50930	AT2G19940
			AT3G50950		AT3G53310	AT2G27720		AT3G50950	AT2G20240
			AT3G51730		AT3G54150	AT2G28150		AT3G51730	AT2G20250
			AT3G52400		AT3G54640	AT2G28470		AT3G52400	AT2G20360
			AT3G54100		AT3G55270	AT2G28605		AT3G54100	AT2G20890
			AT3G54150		AT3G55320	AT2G29050		AT3G54150	AT2G20990
			AT3G55950		AT3G55470	AT2G29980		AT3G55950	AT2G21170
			AT3G55960		AT3G55740	AT2G30150		AT3G55960	AT2G21280
			AT3G57750		AT3G55880	AT2G31170		AT3G57750	AT2G21330
			AT3G58600		AT3G55890	AT2G32000		AT3G58600	AT2G21385
			AT3G59090		AT3G55910	AT2G32450		AT3G59090	AT2G21530
			AT3G59700		AT3G56030	AT2G32640		AT3G59700	AT2G21540
			AT3G59940		AT3G56410	AT2G32690		AT3G59940	AT2G22230
			AT3G60140		AT3G57530	AT2G32940		AT3G60140	AT2G22670
			AT3G61060		AT3G57540	AT2G33255		AT3G61060	AT2G23380
			AT3G61180		AT3G57680	AT2G33330		AT3G61180	AT2G23820
			AT3G61190		AT3G59660	AT2G33450		AT3G61190	AT2G24020
			AT3G62420		AT3G60110	AT2G33800		AT3G62420	AT2G24090
			AT3G63310		AT3G60180	AT2G34520		AT3G63310	AT2G24150
			AT4G00355		AT3G60966	AT2G34560		AT4G00355	AT2G24350
			AT4G01000		AT3G62260	AT2G34620		AT4G01000	AT2G24395
			AT4G01010		AT3G63050	AT2G34680		AT4G01010	AT2G24610
			AT4G01840		AT4G01010	AT2G35450		AT4G01840	AT2G25830
			AT4G02350		AT4G01290	AT2G35500		AT4G02350	AT2G25840
			AT4G02380		AT4G01480	AT2G36000		AT4G02380	AT2G25870
			AT4G04960		AT4G01610	AT2G36050		AT4G04960	AT2G26260
			AT4G08920		AT4G02280	AT2G36620		AT4G08920	AT2G26550
			AT4G08950		AT4G02410	AT2G36885		AT4G08950	AT2G27130
			AT4G11300		AT4G03260	AT2G36990		AT4G11300	AT2G27720
			AT4G11850		AT4G03320	AT2G37050		AT4G11850	AT2G28150
			AT4G11860		AT4G04620	AT2G37220		AT4G11860	AT2G28470
			AT4G12720		AT4G05590	AT2G37450		AT4G12720	AT2G28605
			AT4G13340		AT4G07390	AT2G37470		AT4G13340	AT2G29050
			AT4G13395		AT4G08500	AT2G37585		AT4G13395	AT2G29980
			AT4G13510		AT4G08510	AT2G37660		AT4G13510	AT2G30150
			AT4G13830		AT4G08900	AT2G37790		AT4G13830	AT2G31170
			AT4G14365		AT4G08960	AT2G38025		AT4G14365	AT2G32000
			AT4G14370		AT4G09340	AT2G38140		AT4G14370	AT2G32450
			AT4G15530		AT4G09750	AT2G38330		AT4G15530	AT2G32640
			AT4G15800		AT4G09830	AT2G38540		AT4G15800	AT2G32690
			AT4G17070		AT4G10040	AT2G38570		AT4G17070	AT2G32940
			AT4G17245		AT4G10380	AT2G38700		AT4G17245	AT2G33255
			AT4G17250		AT4G10960	AT2G38720		AT4G17250	AT2G33330
			AT4G17500		AT4G11160	AT2G39090		AT4G17500	AT2G33450
			AT4G17900		AT4G11220	AT2G39140		AT4G17900	AT2G33800
			AT4G18010		AT4G11350	AT2G39190		AT4G18010	AT2G34520
			AT4G18250		AT4G11670	AT2G40010		AT4G18250	AT2G34560
			AT4G18880		AT4G11910	AT2G40150		AT4G18880	AT2G34620
			AT4G18950		AT4G11960	AT2G40480		AT4G18950	AT2G34680
			AT4G20830		AT4G12070	AT2G40490		AT4G20830	AT2G35450
			AT4G21390		AT4G12080	AT2G40540		AT4G21390	AT2G35500
			AT4G21980		AT4G12290	AT2G41170		AT4G21980	AT2G36000
			AT4G22360		AT4G12300	AT2G42170		AT4G22360	AT2G36050
			AT4G23220		AT4G12735	AT2G42210		AT4G23220	AT2G36620
			AT4G23450		AT4G13920	AT2G42220		AT4G23450	AT2G36885
			AT4G23570		AT4G14710	AT2G42380		AT4G23570	AT2G36990
			AT4G24570		AT4G15130	AT2G42570		AT4G24570	AT2G37050
			AT4G25390		AT4G15270	AT2G42870		AT4G25390	AT2G37220
			AT4G25810		AT4G15490	AT2G43030		AT4G25810	AT2G37450
			AT4G25940		AT4G16190	AT2G43560		AT4G25940	AT2G37470
			AT4G26090		AT4G16745	AT2G43750		AT4G26090	AT2G37585
			AT4G26120		AT4G16957	AT2G43900		AT4G26120	AT2G37660
			AT4G27280		AT4G16960	AT2G44040		AT4G27280	AT2G37790
			AT4G27470		AT4G17330	AT2G44640		AT4G27470	AT2G38025
			AT4G28240		AT4G17670	AT2G44650		AT4G28240	AT2G38140
			AT4G28400		AT4G18580	AT2G44740		AT4G28400	AT2G38330
			AT4G29190		AT4G18880	AT2G45270		AT4G29190	AT2G38540
			AT4G30280		AT4G18930	AT2G45470		AT4G30280	AT2G38570
			AT4G32760		AT4G19010	AT2G45770		AT4G32760	AT2G38700
			AT4G33050		AT4G19950	AT2G45970		AT4G33050	AT2G38720
			AT4G33920		AT4G20480	AT2G46780		AT4G33920	AT2G39090
			AT4G33985		AT4G21120	AT2G46810		AT4G33985	AT2G39140
			AT4G34150		AT4G21215	AT2G47450		AT4G34150	AT2G39190
			AT4G34390		AT4G21670	AT2G47630		AT4G34390	AT2G40010
			AT4G35310		AT4G21903	AT2G47940		AT4G35310	AT2G40150
			AT4G35600		AT4G22240	AT2G48070		AT4G35600	AT2G40480
			AT4G36030		AT4G22260	AT3G01370		AT4G36030	AT2G40490
			AT4G36040		AT4G22270	AT3G01480		AT4G36040	AT2G40540
			AT4G36790		AT4G22980	AT3G02080		AT4G36790	AT2G41170
			AT4G37260		AT4G23010	AT3G02110		AT4G37260	AT2G42170
			AT4G37370		AT4G23030	AT3G02540		AT4G37370	AT2G42210
			AT4G37610		AT4G23450	AT3G02660		AT4G37610	AT2G42220
			AT4G38550		AT4G24000	AT3G02870		AT4G38550	AT2G42380
			AT4G39090		AT4G24450	AT3G03820		AT4G39090	AT2G42570
			AT4G39140		AT4G25480	AT3G03980		AT4G39140	AT2G42870
			AT4G39580		AT4G26270	AT3G04790		AT4G39580	AT2G43030
			AT4G39670		AT4G27480	AT3G04810		AT4G39670	AT2G43560
			AT4G39830		AT4G27585	AT3G05000		AT4G39830	AT2G43750
			AT4G39890		AT4G27652	AT3G05625		AT4G39890	AT2G43900
			AT5G01100		AT4G27654	AT3G05910		AT5G01100	AT2G44040
			AT5G02290		AT4G28390	AT3G06140		AT5G02290	AT2G44640
			AT5G03320		AT4G28570	AT3G06370		AT5G03320	AT2G44650
			AT5G03330		AT4G29210	AT3G06640		AT5G03330	AT2G44740
			AT5G03355		AT4G29780	AT3G06770		AT5G03355	AT2G45270
			AT5G03540		AT4G30100	AT3G06880		AT5G03540	AT2G45470
			AT5G04040		AT4G30490	AT3G07210		AT5G04040	AT2G45770
			AT5G04340		AT4G31130	AT3G07540		AT5G04340	AT2G45970
			AT5G04550		AT4G31500	AT3G07568		AT5G04550	AT2G46780
			AT5G04720		AT4G32020	AT3G08600		AT5G04720	AT2G46810
			AT5G04930		AT4G32620	AT3G08680		AT5G04930	AT2G47450
			AT5G05190		AT4G32940	AT3G08740		AT5G05190	AT2G47630
			AT5G05300		AT4G33050	AT3G08920		AT5G05300	AT2G47940
			AT5G05440		AT4G33890	AT3G08940		AT5G05440	AT2G48070
			AT5G05930		AT4G33920	AT3G09210		AT5G05930	AT3G01370
			AT5G06320		AT4G34881	AT3G09800		AT5G06320	AT3G01480
			AT5G07100		AT4G35190	AT3G09860		AT5G07100	AT3G02080
			AT5G08240		AT4G35260	AT3G10080		AT5G08240	AT3G02110
			AT5G08790		AT4G36010	AT3G10700		AT5G08790	AT3G02540
			AT5G10695		AT4G36220	AT3G11630		AT5G10695	AT3G02660
			AT5G10960		AT4G36650	AT3G11760		AT5G10960	AT3G02870
			AT5G11000		AT4G37120	AT3G12110		AT5G11000	AT3G03820
			AT5G12880		AT4G38440	AT3G12345		AT5G12880	AT3G03980
			AT5G13080		AT4G38495	AT3G12930		AT5G13080	AT3G04790
			AT5G13190		AT4G38540	AT3G13000		AT5G13190	AT3G04810
			AT5G14540		AT4G39270	AT3G13120		AT5G14540	AT3G05000
			AT5G14930		AT4G39580	AT3G13360		AT5G14930	AT3G05625
			AT5G15260		AT4G40080	AT3G13700		AT5G15260	AT3G05910
			AT5G15870		AT5G02040	AT3G14110		AT5G15870	AT3G06140
			AT5G16120		AT5G02100	AT3G14240		AT5G16120	AT3G06370
			AT5G16370		AT5G03204	AT3G14290		AT5G16370	AT3G06640
			AT5G18270		AT5G03210	AT3G14760		AT5G18270	AT3G06770
			AT5G18470		AT5G03630	AT3G14930		AT5G18470	AT3G06880
			AT5G18490		AT5G03990	AT3G15190		AT5G18490	AT3G07210
			AT5G19240		AT5G04090	AT3G15520		AT5G19240	AT3G07540
			AT5G21940		AT5G04340	AT3G15620		AT5G21940	AT3G07568
			AT5G22270		AT5G04760	AT3G15680		AT5G22270	AT3G08600
			AT5G22380		AT5G04980	AT3G16000		AT5G22380	AT3G08680
			AT5G22520		AT5G05110	AT3G16060		AT5G22520	AT3G08740
			AT5G22540		AT5G05410	AT3G16240		AT5G22540	AT3G08920
			AT5G24210		AT5G06230	AT3G16370		AT5G24210	AT3G08940
			AT5G24870		AT5G06510	AT3G17090		AT5G24870	AT3G09210
			AT5G25250		AT5G06960	AT3G18390		AT5G25250	AT3G09800
			AT5G25280		AT5G07100	AT3G18890		AT5G25280	AT3G09860
			AT5G25350		AT5G07470	AT3G18940		AT5G25350	AT3G10080
			AT5G25930		AT5G07920	AT3G18960		AT5G25930	AT3G10700
			AT5G26751		AT5G09470	AT3G19180		AT5G26751	AT3G11630
			AT5G26920		AT5G10625	AT3G19570		AT5G26920	AT3G11760
			AT5G27420		AT5G10750	AT3G19820		AT5G27420	AT3G12110
			AT5G28770		AT5G10780	AT3G20350		AT5G28770	AT3G12345
			AT5G35735		AT5G11310	AT3G20680		AT5G35735	AT3G12930
			AT5G39030		AT5G11670	AT3G20790		AT5G39030	AT3G13000
			AT5G39610		AT5G11730	AT3G21055		AT5G39610	AT3G13120
			AT5G39660		AT5G12890	AT3G21870		AT5G39660	AT3G13360
			AT5G40170		AT5G13180	AT3G22110		AT5G40170	AT3G13700
			AT5G41740		AT5G13200	AT3G22120		AT5G41740	AT3G14110
			AT5G41750		AT5G13390	AT3G23450		AT5G41750	AT3G14240
			AT5G42050		AT5G13800	AT3G23530		AT5G42050	AT3G14290
			AT5G42380		AT5G13820	AT3G23690		AT5G42380	AT3G14760
			AT5G43190		AT5G14700	AT3G23730		AT5G43190	AT3G14930
			AT5G45110		AT5G15190	AT3G23760		AT5G45110	AT3G15190
			AT5G46080		AT5G15500	AT3G23880		AT5G46080	AT3G15520
			AT5G46295		AT5G17860	AT3G24430		AT5G46295	AT3G15620
			AT5G46410		AT5G18065	AT3G24570		AT5G46410	AT3G15680
			AT5G46710		AT5G18130	AT3G25480		AT5G46710	AT3G16000
			AT5G46780		AT5G18310	AT3G25660		AT5G46780	AT3G16060
			AT5G47070		AT5G19470	AT3G25805		AT5G47070	AT3G16240
			AT5G47220		AT5G19900	AT3G25920		AT5G47220	AT3G16370
			AT5G47850		AT5G22060	AT3G26060		AT5G47850	AT3G17090
			AT5G48380		AT5G22300	AT3G26570		AT5G48380	AT3G18390
			AT5G48657		AT5G22350	AT3G26710		AT5G48657	AT3G18890
			AT5G50450		AT5G22450	AT3G26720		AT5G50450	AT3G18940
			AT5G52250		AT5G23850	AT3G26900		AT5G52250	AT3G18960
			AT5G52750		AT5G24080	AT3G26950		AT5G52750	AT3G19180
			AT5G53550		AT5G24090	AT3G27160		AT5G53550	AT3G19570
			AT5G54710		AT5G25770	AT3G27690		AT5G54710	AT3G19820
			AT5G54870		AT5G25820	AT3G27830		AT5G54870	AT3G20350
			AT5G56180		AT5G27600	AT3G28460		AT5G56180	AT3G20680
			AT5G56340		AT5G27930	AT3G28760		AT5G56340	AT3G20790
			AT5G57035		AT5G33290	AT3G29185		AT5G57035	AT3G21055
			AT5G57550		AT5G35370	AT3G29280		AT5G57550	AT3G21870
			AT5G57560		AT5G37600	AT3G29631		AT5G57560	AT3G22110
			AT5G57580		AT5G38240	AT3G43190		AT5G57580	AT3G22120
			AT5G57710		AT5G39030	AT3G43610		AT5G57710	AT3G23450
			AT5G57910		AT5G39520	AT3G44890		AT5G57910	AT3G23530
			AT5G58120		AT5G39785	AT3G45850		AT5G58120	AT3G23690
			AT5G58650		AT5G40240	AT3G45980		AT5G58650	AT3G23730
			AT5G58787		AT5G41410	AT3G46200		AT5G58787	AT3G23760
			AT5G59820		AT5G42050	AT3G47650		AT5G59820	AT3G23880
			AT5G61210		AT5G42825	AT3G47860		AT5G61210	AT3G24430
			AT5G61500		AT5G43450	AT3G48110		AT5G61500	AT3G24570
			AT5G61530		AT5G43650	AT3G48187		AT5G61530	AT3G25480
			AT5G61560		AT5G43670	AT3G48730		AT5G61560	AT3G25660
			AT5G62020		AT5G43780	AT3G49140		AT5G62020	AT3G25805
			AT5G62165		AT5G44060	AT3G49250		AT5G62165	AT3G25920
			AT5G62280		AT5G44980	AT3G49260		AT5G62280	AT3G26060
			AT5G62610		AT5G45260	AT3G49470		AT5G62610	AT3G26570
			AT5G64190		AT5G45380	AT3G49650		AT5G64190	AT3G26710
			AT5G64410		AT5G45990	AT3G49670		AT5G64410	AT3G26720
			AT5G64430		AT5G46180	AT3G49680		AT5G64430	AT3G26900
			AT5G65200		AT5G46760	AT3G50240		AT5G65200	AT3G26950
			AT5G65920		AT5G47860	AT3G50685		AT5G65920	AT3G27160
			AT5G66070		AT5G47880	AT3G51080		AT5G66070	AT3G27690
			AT5G66620		AT5G47910	AT3G51150		AT5G66620	AT3G27830
			AT5G67480		AT5G48400	AT3G51230		AT5G67480	AT3G28460
					AT5G48410	AT3G51470		AT1G01355	AT3G28760
					AT5G49530	AT3G51820		AT1G01500	AT3G29185
					AT5G49630	AT3G52150		AT1G01550	AT3G29280
					AT5G50360	AT3G52750		AT1G02460	AT3G29631
					AT5G51040	AT3G52840		AT1G02470	AT3G43190
					AT5G51510	AT3G52900		AT1G02740	AT3G43610
					AT5G52040	AT3G52960		AT1G02850	AT3G44890
					AT5G52390	AT3G53130		AT1G03200	AT3G45850
					AT5G52450	AT3G53190		AT1G03495	AT3G45980
					AT5G52640	AT3G53470		AT1G03550	AT3G46200
					AT5G53300	AT3G53580		AT1G03940	AT3G47650
					AT5G53450	AT3G53850		AT1G04070	AT3G47860
					AT5G53750	AT3G53900		AT1G04570	AT3G48110
					AT5G54470	AT3G54050		AT1G04970	AT3G48187
					AT5G54840	AT3G54210		AT1G05060	AT3G48730
					AT5G55560	AT3G54650		AT1G05570	AT3G49140
					AT5G56840	AT3G54920		AT1G05575	AT3G49250
					AT5G58210	AT3G55250		AT1G05783	AT3G49260
					AT5G58680	AT3G55800		AT1G06780	AT3G49470
					AT5G59220	AT3G56040		AT1G07620	AT3G49650
					AT5G59530	AT3G56130		AT1G07630	AT3G49670
					AT5G59540	AT3G56910		AT1G07900	AT3G49680
					AT5G59700	AT3G56940		AT1G08620	AT3G50240
					AT5G59780	AT3G57030		AT1G09230	AT3G50685
					AT5G60360	AT3G57050		AT1G09480	AT3G51080
					AT5G60790	AT3G57560		AT1G11210	AT3G51150
					AT5G61640	AT3G58120		AT1G12290	AT3G51230
					AT5G61820	AT3G58140		AT1G12940	AT3G51470
					AT5G62000	AT3G59780		AT1G13830	AT3G51820
					AT5G62150	AT3G59970		AT1G15780	AT3G52150
					AT5G62620	AT3G60210		AT1G16540	AT3G52750
					AT5G62740	AT3G60370		AT1G17370	AT3G52840
					AT5G63130	AT3G61870		AT1G17440	AT3G52900
					AT5G63760	AT3G62030		AT1G17550	AT3G52960
					AT5G64260	AT3G62120		AT1G18470	AT3G53130
					AT5G64450	AT3G62390		AT1G18750	AT3G53190
					AT5G65240	AT3G62530		AT1G18860	AT3G53470
					AT5G65600	AT3G62910		AT1G18900	AT3G53580
					AT5G66650	AT3G63200		AT1G19200	AT3G53850
					AT5G67310	AT3G63410		AT1G19210	AT3G53900
						AT3G63490		AT1G20980	AT3G54050
						AT3G63510		AT1G23040	AT3G54210
						AT4G00400		AT1G24490	AT3G54650
						AT4G00810		AT1G25141	AT3G54920
						AT4G01040		AT1G25277	AT3G55250
						AT4G01050		AT1G25370	AT3G55800
						AT4G01150		AT1G25500	AT3G56040
						AT4G01310		AT1G25520	AT3G56130
						AT4G01690		AT1G27580	AT3G56910
						AT4G01800		AT1G27760	AT3G56940
						AT4G01900		AT1G28230	AT3G57030
						AT4G02530		AT1G28570	AT3G57050
						AT4G02580		AT1G28600	AT3G57560
						AT4G02770		AT1G30220	AT3G58120
						AT4G02850		AT1G30400	AT3G58140
						AT4G03270		AT1G30475	AT3G59780
						AT4G04350		AT1G30810	AT3G59970
						AT4G08685		AT1G30970	AT3G60210
						AT4G09010		AT1G31820	AT3G60370
						AT4G09040		AT1G32350	AT3G61870
						AT4G09650		AT1G33030	AT3G62030
						AT4G10030		AT1G33102	AT3G62120
						AT4G11100		AT1G33110	AT3G62390
						AT4G11680		AT1G33980	AT3G62530
						AT4G12970		AT1G34060	AT3G62910
						AT4G13500		AT1G34260	AT3G63200
						AT4G13575		AT1G45150	AT3G63410
						AT4G13670		AT1G48000	AT3G63490
						AT4G13720		AT1G48430	AT3G63510
						AT4G14360		AT1G48490	AT4G00400
						AT4G14870		AT1G49360	AT4G00810
						AT4G14960		AT1G50570	AT4G01040
						AT4G15510		AT1G51660	AT4G01050
						AT4G15560		AT1G52000	AT4G01150
						AT4G15802		AT1G53780	AT4G01310
						AT4G16155		AT1G53910	AT4G01690
						AT4G16442		AT1G54100	AT4G01800
						AT4G16570		AT1G54575	AT4G01900
						AT4G16980		AT1G55110	AT4G02530
						AT4G17190		AT1G55265	AT4G02580
						AT4G17300		AT1G55730	AT4G02770
						AT4G17540		AT1G56010	AT4G02850
						AT4G17560		AT1G56140	AT4G03270
						AT4G17600		AT1G56145	AT4G04350
						AT4G17810		AT1G56280	AT4G08685
						AT4G18370		AT1G56650	AT4G09010
						AT4G18480		AT1G57590	AT4G09040
						AT4G18670		AT1G58235	AT4G09650
						AT4G19380		AT1G59910	AT4G10030
						AT4G19830		AT1G60730	AT4G11100
						AT4G19985		AT1G60900	AT4G11680
						AT4G20130		AT1G61800	AT4G12970
						AT4G20360		AT1G62810	AT4G13500
						AT4G20760		AT1G63010	AT4G13575
						AT4G20870		AT1G63370	AT4G13670
						AT4G21070		AT1G63840	AT4G13720
						AT4G21280		AT1G64840	AT4G14360
						AT4G22290		AT1G64950	AT4G14870
						AT4G22850		AT1G64970	AT4G14960
						AT4G23500		AT1G65690	AT4G15510
						AT4G23790		AT1G65790	AT4G15560
						AT4G23820		AT1G65820	AT4G15802
						AT4G23940		AT1G67650	AT4G16155
						AT4G24090		AT1G69310	AT4G16442
						AT4G24250		AT1G69450	AT4G16570
						AT4G24620		AT1G69480	AT4G16980
						AT4G24770		AT1G69640	AT4G17190
						AT4G24930		AT1G69810	AT4G17300
						AT4G25050		AT1G69870	AT4G17540
						AT4G25080		AT1G71040	AT4G17560
						AT4G25290		AT1G71800	AT4G17600
						AT4G25990		AT1G71910	AT4G17810
						AT4G26555		AT1G72800	AT4G18370
						AT4G27030		AT1G72840	AT4G18480
						AT4G27370		AT1G73040	AT4G18670
						AT4G27430		AT1G73130	AT4G19380
						AT4G27440		AT1G73700	AT4G19830
						AT4G27760		AT1G74010	AT4G19985
						AT4G28050		AT1G74020	AT4G20130
						AT4G28080		AT1G74810	AT4G20360
						AT4G28180		AT1G76520	AT4G20760
						AT4G28660		AT1G76820	AT4G20870
						AT4G28730		AT1G76955	AT4G21070
						AT4G28780		AT1G77920	AT4G21280
						AT4G29310		AT1G78190	AT4G22290
						AT4G30410		AT1G78670	AT4G22850
						AT4G31250		AT1G78780	AT4G23500
						AT4G31270		AT1G79270	AT4G23790
						AT4G31290		AT1G79610	AT4G23820
						AT4G31590		AT1G80010	AT4G23940
						AT4G31850		AT1G80300	AT4G24090
						AT4G32710		AT1G80910	AT4G24250
						AT4G32915		AT2G01600	AT4G24620
						AT4G33000		AT2G02370	AT4G24770
						AT4G33220		AT2G02390	AT4G24930
						AT4G33360		AT2G07718	AT4G25050
						AT4G34090		AT2G11520	AT4G25080
						AT4G34190		AT2G17290	AT4G25290
						AT4G34220		AT2G17500	AT4G25990
						AT4G34620		AT2G17760	AT4G26555
						AT4G34730		AT2G18950	AT4G27030
						AT4G34750		AT2G20310	AT4G27370
						AT4G34760		AT2G20560	AT4G27430
						AT4G35100		AT2G20900	AT4G27440
						AT4G35730		AT2G20960	AT4G27760
						AT4G35920		AT2G21500	AT4G28050
						AT4G35950		AT2G21620	AT4G28080
						AT4G36230		AT2G26230	AT4G28180
						AT4G36850		AT2G27090	AT4G28660
						AT4G37110		AT2G28400	AT4G28730
						AT4G37220		AT2G28500	AT4G28780
						AT4G37280		AT2G29350	AT4G29310
						AT4G37550		AT2G30020	AT4G30410
						AT4G37800		AT2G30840	AT4G31250
						AT4G38430		AT2G31990	AT4G31270
						AT4G38860		AT2G32660	AT4G31290
						AT4G38950		AT2G32830	AT4G31590
						AT4G39040		AT2G33080	AT4G31850
						AT4G39050		AT2G33150	AT4G32710
						AT4G39620		AT2G33730	AT4G32915
						AT4G39900		AT2G34660	AT4G33000
						AT5G01015		AT2G35510	AT4G33220
						AT5G01590		AT2G35550	AT4G33360
						AT5G01630		AT2G35940	AT4G34090
						AT5G02160		AT2G36580	AT4G34190
						AT5G02450		AT2G37410	AT4G34220
						AT5G02540		AT2G38340	AT4G34620
						AT5G02710		AT2G38800	AT4G34730
						AT5G02890		AT2G39050	AT4G34750
						AT5G03940		AT2G39260	AT4G34760
						AT5G04320		AT2G39480	AT4G35100
						AT5G04890		AT2G39710	AT4G35730
						AT5G05740		AT2G40950	AT4G35920
						AT5G05890		AT2G41210	AT4G35950
						AT5G05940		AT2G41380	AT4G36230
						AT5G06290		AT2G42350	AT4G36850
						AT5G06970		AT2G42760	AT4G37110
						AT5G07590		AT2G44280	AT4G37220
						AT5G08050		AT2G44480	AT4G37280
						AT5G08280		AT2G44520	AT4G37550
						AT5G08330		AT2G44578	AT4G37800
						AT5G09650		AT2G44750	AT4G38430
						AT5G09760		AT2G44990	AT4G38860
						AT5G09995		AT2G45510	AT4G38950
						AT5G10150		AT2G46430	AT4G39040
						AT5G10160		AT2G46680	AT4G39050
						AT5G10200		AT2G47190	AT4G39620
						AT5G10460		AT3G02875	AT4G39900
						AT5G10540		AT3G03470	AT5G01015
						AT5G10620		AT3G04240	AT5G01590
						AT5G10690		AT3G04420	AT5G01630
						AT5G10900		AT3G05360	AT5G02160
						AT5G11450		AT3G05380	AT5G02450
						AT5G11480		AT3G05937	AT5G02540
						AT5G12940		AT3G06170	AT5G02710
						AT5G13120		AT3G06860	AT5G02890
						AT5G13140		AT3G07600	AT5G03940
						AT5G13260		AT3G08690	AT5G04320
						AT5G13460		AT3G09440	AT5G04890
						AT5G13510		AT3G09830	AT5G05740
						AT5G13630		AT3G10320	AT5G05890
						AT5G13710		AT3G10480	AT5G05940
						AT5G13730		AT3G10490	AT5G06290
						AT5G13770		AT3G10500	AT5G06970
						AT5G13980		AT3G11080	AT5G07590
						AT5G14320		AT3G11150	AT5G08050
						AT5G14460		AT3G11410	AT5G08280
						AT5G14610		AT3G12580	AT5G08330
						AT5G14790		AT3G13229	AT5G09650
						AT5G14910		AT3G14070	AT5G09760
						AT5G15780		AT3G14230	AT5G09995
						AT5G16030		AT3G14280	AT5G10150
						AT5G16140		AT3G14440	AT5G10160
						AT5G16390		AT3G14700	AT5G10200
						AT5G16440		AT3G15353	AT5G10460
						AT5G16590		AT3G15880	AT5G10540
						AT5G16715		AT3G16860	AT5G10620
						AT5G16870		AT3G16910	AT5G10690
						AT5G17230		AT3G16990	AT5G10900
						AT5G17310		AT3G17790	AT5G11450
						AT5G17400		AT3G17800	AT5G11480
						AT5G17870		AT3G17810	AT5G12940
						AT5G18410		AT3G19660	AT5G13120
						AT5G18460		AT3G20250	AT5G13140
						AT5G18660		AT3G22330	AT5G13260
						AT5G18970		AT3G22460	AT5G13460
						AT5G19760		AT3G24929	AT5G13510
						AT5G20060		AT3G26280	AT5G13630
						AT5G20500		AT3G26590	AT5G13710
						AT5G21222		AT3G26840	AT5G13730
						AT5G21920		AT3G27260	AT5G13770
						AT5G21930		AT3G27820	AT5G13980
						AT5G22340		AT3G28580	AT5G14320
						AT5G22640		AT3G28950	AT5G14460
						AT5G22800		AT3G30390	AT5G14610
						AT5G22830		AT3G44670	AT5G14790
						AT5G22940		AT3G45650	AT5G14910
						AT5G23420		AT3G46530	AT5G15780
						AT5G23670		AT3G46730	AT5G16030
						AT5G24165		AT3G46920	AT5G16140
						AT5G24314		AT3G48020	AT5G16390
						AT5G24490		AT3G49210	AT5G16440
						AT5G25370		AT3G50910	AT5G16590
						AT5G26000		AT3G51070	AT5G16715
						AT5G26670		AT3G51960	AT5G16870
						AT5G26820		AT3G52710	AT5G17230
						AT5G27390		AT3G52800	AT5G17310
						AT5G27450		AT3G53310	AT5G17400
						AT5G30510		AT3G54640	AT5G17870
						AT5G35360		AT3G55270	AT5G18410
						AT5G35740		AT3G55320	AT5G18460
						AT5G35790		AT3G55470	AT5G18660
						AT5G37660		AT3G55740	AT5G18970
						AT5G38300		AT3G55880	AT5G19760
						AT5G38430		AT3G55890	AT5G20060
						AT5G39530		AT3G55910	AT5G20500
						AT5G40740		AT3G56030	AT5G21222
						AT5G40950		AT3G56410	AT5G21920
						AT5G41060		AT3G57530	AT5G21930
						AT5G42070		AT3G57540	AT5G22340
						AT5G42240		AT3G57680	AT5G22640
						AT5G42810		AT3G59660	AT5G22800
						AT5G43050		AT3G60110	AT5G22830
						AT5G44340		AT3G60180	AT5G22940
						AT5G44680		AT3G60966	AT5G23420
						AT5G45040		AT3G62260	AT5G23670
						AT5G45290		AT3G63050	AT5G24165
						AT5G45390		AT4G01290	AT5G24314
						AT5G45490		AT4G01480	AT5G24490
						AT5G45680		AT4G01610	AT5G25370
						AT5G45930		AT4G02280	AT5G26000
						AT5G45950		AT4G02410	AT5G26670
						AT5G46110		AT4G03260	AT5G26820
						AT5G46290		AT4G03320	AT5G27390
						AT5G46420		AT4G04620	AT5G27450
						AT5G46730		AT4G05590	AT5G30510
						AT5G47190		AT4G07390	AT5G35360
						AT5G47380		AT4G08500	AT5G35740
						AT5G47520		AT4G08510	AT5G35790
						AT5G47540		AT4G08900	AT5G37660
						AT5G47700		AT4G08960	AT5G38300
						AT5G47770		AT4G09340	AT5G38430
						AT5G48220		AT4G09750	AT5G39530
						AT5G48460		AT4G09830	AT5G40740
						AT5G48900		AT4G10040	AT5G40950
						AT5G49030		AT4G10380	AT5G41060
						AT5G49555		AT4G10960	AT5G42070
						AT5G51110		AT4G11160	AT5G42240
						AT5G52100		AT4G11220	AT5G42810
						AT5G52440		AT4G11350	AT5G43050
						AT5G52540		AT4G11670	AT5G44340
						AT5G52840		AT4G11910	AT5G44680
						AT5G52960		AT4G11960	AT5G45040
						AT5G53170		AT4G12070	AT5G45290
						AT5G53490		AT4G12080	AT5G45390
						AT5G53860		AT4G12290	AT5G45490
						AT5G54200		AT4G12300	AT5G45680
						AT5G54270		AT4G12735	AT5G45930
						AT5G54600		AT4G13920	AT5G45950
						AT5G55480		AT4G14710	AT5G46110
						AT5G55540		AT4G15130	AT5G46290
						AT5G56590		AT4G15270	AT5G46420
						AT5G56720		AT4G15490	AT5G46730
						AT5G56850		AT4G16190	AT5G47190
						AT5G57030		AT4G16745	AT5G47380
						AT5G57440		AT4G16957	AT5G47520
						AT5G57700		AT4G16960	AT5G47540
						AT5G57760		AT4G17330	AT5G47700
						AT5G57785		AT4G17670	AT5G47770
						AT5G58300		AT4G18580	AT5G48220
						AT5G59613		AT4G18930	AT5G48460
						AT5G59690		AT4G19010	AT5G48900
						AT5G59970		AT4G19950	AT5G49030
						AT5G61130		AT4G20480	AT5G49555
						AT5G62410		AT4G21120	AT5G51110
						AT5G63180		AT4G21215	AT5G52100
						AT5G63310		AT4G21670	AT5G52440
						AT5G63700		AT4G21903	AT5G52540
						AT5G63780		AT4G22240	AT5G52840
						AT5G64040		AT4G22260	AT5G52960
						AT5G64460		AT4G22270	AT5G53170
						AT5G64630		AT4G22980	AT5G53490
						AT5G64940		AT4G23010	AT5G53860
						AT5G65220		AT4G23030	AT5G54200
						AT5G65440		AT4G24000	AT5G54270
						AT5G65810		AT4G24450	AT5G54600
						AT5G66005		AT4G25480	AT5G55480
						AT5G66410		AT4G26270	AT5G55540
						AT5G66530		AT4G27480	AT5G56590
						AT5G66550		AT4G27585	AT5G56720
						AT5G66580		AT4G27652	AT5G56850
								AT4G27654	AT5G57030
								AT4G28390	AT5G57440
								AT4G28570	AT5G57700
								AT4G29210	AT5G57760
								AT4G29780	AT5G57785
								AT4G30100	AT5G58300
								AT4G30490	AT5G59613
								AT4G31130	AT5G59690
								AT4G31500	AT5G59970
								AT4G32020	AT5G61130
								AT4G32620	AT5G62410
								AT4G32940	AT5G63180
								AT4G33890	AT5G63310
								AT4G34881	AT5G63700
								AT4G35190	AT5G63780
								AT4G35260	AT5G64040
								AT4G36010	AT5G64460
								AT4G36220	AT5G64630
								AT4G36650	AT5G64940
								AT4G37120	AT5G65220
								AT4G38440	AT5G65440
								AT4G38495	AT5G65810
								AT4G38540	AT5G66005
								AT4G39270	AT5G66410
								AT4G40080	AT5G66530
								AT5G02040	AT5G66550
								AT5G02100	AT5G66580
								AT5G03204
								AT5G03210
								AT5G03630
								AT5G03990
								AT5G04090
								AT5G04760
								AT5G04980
								AT5G05110
								AT5G05410
								AT5G06230
								AT5G06510
								AT5G06960
								AT5G07470
								AT5G07920
								AT5G09470
								AT5G10625
								AT5G10750
								AT5G10780
								AT5G11310
								AT5G11670
								AT5G11730
								AT5G12890
								AT5G13180
								AT5G13200
								AT5G13390
								AT5G13800
								AT5G13820
								AT5G14700
								AT5G15190
								AT5G15500
								AT5G17860
								AT5G18065
								AT5G18130
								AT5G18310
								AT5G19470
								AT5G19900
								AT5G22060
								AT5G22300
								AT5G22350
								AT5G22450
								AT5G23850
								AT5G24080
								AT5G24090
								AT5G25770
								AT5G25820
								AT5G27600
								AT5G27930
								AT5G33290
								AT5G35370
								AT5G37600
								AT5G38240
								AT5G39520
								AT5G39785
								AT5G40240
								AT5G41410
								AT5G42825
								AT5G43450
								AT5G43650
								AT5G43670
								AT5G43780
								AT5G44060
								AT5G44980
								AT5G45260
								AT5G45380
								AT5G45990
								AT5G46180
								AT5G46760
								AT5G47860
								AT5G47880
								AT5G47910
								AT5G48400
								AT5G48410
								AT5G49530
								AT5G49630
								AT5G50360
								AT5G51040
								AT5G51510
								AT5G52040
								AT5G52390
								AT5G52450
								AT5G52640
								AT5G53300
								AT5G53450
								AT5G53750
								AT5G54470
								AT5G54840
								AT5G55560
								AT5G56840
								AT5G58210
								AT5G58680
								AT5G59220
								AT5G59530
								AT5G59540
								AT5G59700
								AT5G59780
								AT5G60360
								AT5G60790
								AT5G61640
								AT5G61820
								AT5G62000
								AT5G62150
								AT5G62620
								AT5G62740
								AT5G63130
								AT5G63760
								AT5G64260
								AT5G64450
								AT5G65240
								AT5G65600
								AT5G66650
								AT5G67310

## Sheet: 35S.Up&cr.Down name description
gene ID	TAIR gene name	external gene name	external gene name source	gene description
AT1G01240	NA	AT1G01240	NCBI gene (formerly Entrezgene)	transmembrane protein [Source:NCBI gene (formerly Entrezgene);Acc:839274]
AT1G01355	NA	AT1G01355	NCBI gene (formerly Entrezgene)	Putative endonuclease or glycosyl hydrolase [Source:NCBI gene (formerly Entrezgene);Acc:6241268]
AT1G01500	NA	AT1G01500	NCBI gene (formerly Entrezgene)	Erythronate-4-phosphate dehydrogenase family protein [Source:NCBI gene (formerly Entrezgene);Acc:839430]
AT1G01550	BPS1	BPS1	NCBI gene (formerly Entrezgene)	BPS1-like protein (DUF793) [Source:NCBI gene (formerly Entrezgene);Acc:839536]
AT1G01560	ATMPK11	MPK11	NCBI gene (formerly Entrezgene)	MAP kinase 11 [Source:NCBI gene (formerly Entrezgene);Acc:839523]
AT1G02390	ATGPAT2	GPAT2	NCBI gene (formerly Entrezgene)	glycerol-3-phosphate acyltransferase 2 [Source:NCBI gene (formerly Entrezgene);Acc:839558]
AT1G02460	NA	AT1G02460	NCBI gene (formerly Entrezgene)	Pectin lyase-like superfamily protein [Source:NCBI gene (formerly Entrezgene);Acc:839443]
AT1G02470	NA	AT1G02470	NCBI gene (formerly Entrezgene)	Polyketide cyclase/dehydrase and lipid transport superfamily protein [Source:NCBI gene (formerly Entrezgene);Acc:837812]
AT1G02610	NA	AT1G02610	NCBI gene (formerly Entrezgene)	RING/FYVE/PHD zinc finger superfamily protein [Source:NCBI gene (formerly Entrezgene);Acc:837915]
AT1G02660	NA	AT1G02660	NCBI gene (formerly Entrezgene)	alpha/beta-Hydrolases superfamily protein [Source:NCBI gene (formerly Entrezgene);Acc:839544]
AT1G02740	NA	AT1G02740	NCBI gene (formerly Entrezgene)	MRG family protein [Source:NCBI gene (formerly Entrezgene);Acc:839455]
AT1G02850	BGLU11	BGLU11	NCBI gene (formerly Entrezgene)	beta glucosidase 11 [Source:NCBI gene (formerly Entrezgene);Acc:839435]
AT1G03200	NA	AT1G03200	NCBI gene (formerly Entrezgene)	NA
AT1G03370	NA	AT1G03370	NCBI gene (formerly Entrezgene)	C2 calcium/lipid-binding and GRAM domain containing protein [Source:NCBI gene (formerly Entrezgene);Acc:839519]
AT1G03495	NA	AT1G03495	NCBI gene (formerly Entrezgene)	HXXXD-type acyl-transferase family protein [Source:NCBI gene (formerly Entrezgene);Acc:3766646]
AT1G03550	NA	SCAMP4	NCBI gene (formerly Entrezgene)	Secretory carrier membrane protein (SCAMP) family protein [Source:NCBI gene (formerly Entrezgene);Acc:839464]
AT1G03730	NA	AT1G03730	NCBI gene (formerly Entrezgene)	pyrroline-5-carboxylate reductase [Source:NCBI gene (formerly Entrezgene);Acc:839106]
AT1G03740	NA	AT1G03740	NCBI gene (formerly Entrezgene)	Protein kinase superfamily protein [Source:NCBI gene (formerly Entrezgene);Acc:839423]
AT1G03940	NA	AT1G03940	NCBI gene (formerly Entrezgene)	HXXXD-type acyl-transferase family protein [Source:NCBI gene (formerly Entrezgene);Acc:839366]
AT1G04070	TOM22-I	TOM22-I	NCBI gene (formerly Entrezgene)	translocase of outer membrane 22-I [Source:NCBI gene (formerly Entrezgene);Acc:839317]
AT1G04280	NA	AT1G04280	NCBI gene (formerly Entrezgene)	P-loop containing nucleoside triphosphate hydrolases superfamily protein [Source:NCBI gene (formerly Entrezgene);Acc:839555]
AT1G04400	CRY2	CRY2	NCBI gene (formerly Entrezgene)	cryptochrome 2 [Source:NCBI gene (formerly Entrezgene);Acc:839529]
AT1G04570	NA	AT1G04570	NCBI gene (formerly Entrezgene)	Major facilitator superfamily protein [Source:NCBI gene (formerly Entrezgene);Acc:839486]
AT1G04970	NA	AT1G04970	NCBI gene (formerly Entrezgene)	lipid-binding serum glycoprotein family protein [Source:NCBI gene (formerly Entrezgene);Acc:839357]
AT1G05060	NA	AT1G05060	NCBI gene (formerly Entrezgene)	coiled-coil protein [Source:NCBI gene (formerly Entrezgene);Acc:839336]
AT1G05570	CALS1	CALS1	NCBI gene (formerly Entrezgene)	callose synthase 1 [Source:NCBI gene (formerly Entrezgene);Acc:837059]
AT1G05575	NA	AT1G05575	NCBI gene (formerly Entrezgene)	transmembrane protein [Source:NCBI gene (formerly Entrezgene);Acc:837061]
AT1G05783	NA	AT1G05783	NCBI gene (formerly Entrezgene)	NA
AT1G06050	NA	AT1G06050	NCBI gene (formerly Entrezgene)	ENHANCED DISEASE RESISTANCE-like protein (DUF1336) [Source:NCBI gene (formerly Entrezgene);Acc:837114]
AT1G06780	GAUT6	GAUT6	NCBI gene (formerly Entrezgene)	galacturonosyltransferase 6 [Source:NCBI gene (formerly Entrezgene);Acc:837189]
AT1G07000	ATEXO70B2	EXO70B2	NCBI gene (formerly Entrezgene)	exocyst subunit exo70 family protein B2 [Source:NCBI gene (formerly Entrezgene);Acc:837210]
AT1G07135	NA	AT1G07135	NCBI gene (formerly Entrezgene)	glycine-rich protein [Source:NCBI gene (formerly Entrezgene);Acc:837224]
AT1G07530	SCL14	SCL14	NCBI gene (formerly Entrezgene)	SCARECROW-like 14 [Source:NCBI gene (formerly Entrezgene);Acc:837267]
AT1G07620	ATOBGM	ATOBGM	NCBI gene (formerly Entrezgene)	GTP-binding protein Obg/CgtA [Source:NCBI gene (formerly Entrezgene);Acc:837275]
AT1G07630	PLL5	PLL5	NCBI gene (formerly Entrezgene)	pol-like 5 [Source:NCBI gene (formerly Entrezgene);Acc:837276]
AT1G07900	LBD1	LBD1	NCBI gene (formerly Entrezgene)	LOB domain-containing protein 1 [Source:NCBI gene (formerly Entrezgene);Acc:837305]
AT1G08620	PKDM7D	PKDM7D	NCBI gene (formerly Entrezgene)	Transcription factor jumonji (jmj) family protein / zinc finger (C5HC2 type) family protein [Source:NCBI gene (formerly Entrezgene);Acc:837384]
AT1G09230	NA	AT1G09230	NCBI gene (formerly Entrezgene)	RNA-binding (RRM/RBD/RNP motifs) family protein [Source:NCBI gene (formerly Entrezgene);Acc:837443]
AT1G09480	NA	AT1G09480	NCBI gene (formerly Entrezgene)	NAD(P)-binding Rossmann-fold superfamily protein [Source:NCBI gene (formerly Entrezgene);Acc:837471]
AT1G09560	GLP5	GLP5	NCBI gene (formerly Entrezgene)	germin-like protein 5 [Source:NCBI gene (formerly Entrezgene);Acc:837482]
AT1G09645	NA	AT1G09645	NCBI gene (formerly Entrezgene)	transmembrane protein [Source:NCBI gene (formerly Entrezgene);Acc:837492]
AT1G10140	NA	AT1G10140	NCBI gene (formerly Entrezgene)	Uncharacterized conserved protein UCP031279 [Source:NCBI gene (formerly Entrezgene);Acc:837551]
AT1G10150	NA	AT1G10150	NCBI gene (formerly Entrezgene)	Carbohydrate-binding protein [Source:NCBI gene (formerly Entrezgene);Acc:837552]
AT1G11210	NA	AT1G11210	NCBI gene (formerly Entrezgene)	cotton fiber protein, putative (DUF761) [Source:NCBI gene (formerly Entrezgene);Acc:837662]
AT1G12220	RPS5	RPS5	NCBI gene (formerly Entrezgene)	Disease resistance protein (CC-NBS-LRR class) family [Source:NCBI gene (formerly Entrezgene);Acc:837775]
AT1G12290	NA	AT1G12290	NCBI gene (formerly Entrezgene)	Disease resistance protein (CC-NBS-LRR class) family [Source:NCBI gene (formerly Entrezgene);Acc:837783]
AT1G12360	KEU	KEU	NCBI gene (formerly Entrezgene)	Sec1/munc18-like (SM) proteins superfamily [Source:NCBI gene (formerly Entrezgene);Acc:837791]
AT1G12450	NA	AT1G12450	NCBI gene (formerly Entrezgene)	SNARE associated Golgi protein family [Source:NCBI gene (formerly Entrezgene);Acc:837802]
AT1G12940	ATNRT2.5	NRT2.5	NCBI gene (formerly Entrezgene)	nitrate transporter2.5 [Source:NCBI gene (formerly Entrezgene);Acc:837852]
AT1G12970	PIRL3	PIRL3	NCBI gene (formerly Entrezgene)	plant intracellular ras group-related LRR 3 [Source:NCBI gene (formerly Entrezgene);Acc:837855]
AT1G12990	NA	AT1G12990	NCBI gene (formerly Entrezgene)	beta-1,4-N-acetylglucosaminyltransferase family protein [Source:NCBI gene (formerly Entrezgene);Acc:837857]
AT1G13210	ACA.l	ACA.l	NCBI gene (formerly Entrezgene)	autoinhibited Ca2+/ATPase II [Source:NCBI gene (formerly Entrezgene);Acc:837881]
AT1G13260	RAV1	RAV1	NCBI gene (formerly Entrezgene)	related to ABI3/VP1 1 [Source:NCBI gene (formerly Entrezgene);Acc:837886]
AT1G13520	NA	AT1G13520	NCBI gene (formerly Entrezgene)	NA
AT1G13830	NA	AT1G13830	NCBI gene (formerly Entrezgene)	Carbohydrate-binding X8 domain superfamily protein [Source:NCBI gene (formerly Entrezgene);Acc:837944]
AT1G14200	NA	AT1G14200	NCBI gene (formerly Entrezgene)	RING/U-box superfamily protein [Source:NCBI gene (formerly Entrezgene);Acc:837980]
AT1G14370	APK2A	APK2A	NCBI gene (formerly Entrezgene)	protein kinase 2A [Source:NCBI gene (formerly Entrezgene);Acc:837999]
AT1G14400	UBC1	UBC1	NCBI gene (formerly Entrezgene)	ubiquitin carrier protein 1 [Source:NCBI gene (formerly Entrezgene);Acc:838002]
AT1G14870	PCR2	PCR2	NCBI gene (formerly Entrezgene)	PLANT CADMIUM RESISTANCE 2 [Source:NCBI gene (formerly Entrezgene);Acc:838052]
AT1G15530	NA	AT1G15530	NCBI gene (formerly Entrezgene)	Concanavalin A-like lectin protein kinase family protein [Source:NCBI gene (formerly Entrezgene);Acc:838123]
AT1G15780	NA	NRB4	NCBI gene (formerly Entrezgene)	mediator of RNA polymerase II transcription subunit 15a-like protein [Source:NCBI gene (formerly Entrezgene);Acc:838147]
AT1G15890	NA	AT1G15890	NCBI gene (formerly Entrezgene)	Disease resistance protein (CC-NBS-LRR class) family [Source:NCBI gene (formerly Entrezgene);Acc:838159]
AT1G16110	WAKL6	WAKL6	NCBI gene (formerly Entrezgene)	wall associated kinase-like 6 [Source:NCBI gene (formerly Entrezgene);Acc:838180]
AT1G16540	SIR3	ABA3	NCBI gene (formerly Entrezgene)	molybdenum cofactor sulfurase (LOS5) (ABA3) [Source:NCBI gene (formerly Entrezgene);Acc:838224]
AT1G16670	NA	AT1G16670	NCBI gene (formerly Entrezgene)	Protein kinase superfamily protein [Source:NCBI gene (formerly Entrezgene);Acc:838236]
AT1G17370	UBP1B	UBP1B	NCBI gene (formerly Entrezgene)	oligouridylate binding protein 1B [Source:NCBI gene (formerly Entrezgene);Acc:838309]
AT1G17440	EER4	EER4	NCBI gene (formerly Entrezgene)	Transcription initiation factor TFIID subunit A [Source:NCBI gene (formerly Entrezgene);Acc:838316]
AT1G17550	HAB2	HAB2	NCBI gene (formerly Entrezgene)	homology to ABI2 [Source:NCBI gene (formerly Entrezgene);Acc:838330]
AT1G17600	NA	AT1G17600	NCBI gene (formerly Entrezgene)	Disease resistance protein (TIR-NBS-LRR class) family [Source:NCBI gene (formerly Entrezgene);Acc:838336]
AT1G18390	NA	AT1G18390	NCBI gene (formerly Entrezgene)	Serine/Threonine kinase family catalytic domain protein [Source:NCBI gene (formerly Entrezgene);Acc:838420]
AT1G18470	NA	AT1G18470	NCBI gene (formerly Entrezgene)	Transmembrane Fragile-X-F-associated protein [Source:NCBI gene (formerly Entrezgene);Acc:838427]
AT1G18570	MYB51	MYB51	NCBI gene (formerly Entrezgene)	myb domain protein 51 [Source:NCBI gene (formerly Entrezgene);Acc:838438]
AT1G18750	AGL65	AGL65	NCBI gene (formerly Entrezgene)	AGAMOUS-like 65 [Source:NCBI gene (formerly Entrezgene);Acc:838457]
AT1G18860	WRKY61	WRKY61	NCBI gene (formerly Entrezgene)	WRKY DNA-binding protein 61 [Source:NCBI gene (formerly Entrezgene);Acc:838467]
AT1G18890	ATCDPK1	CDPK1	NCBI gene (formerly Entrezgene)	calcium-dependent protein kinase 1 [Source:NCBI gene (formerly Entrezgene);Acc:838470]
AT1G18900	NA	AT1G18900	NCBI gene (formerly Entrezgene)	Pentatricopeptide repeat (PPR) superfamily protein [Source:NCBI gene (formerly Entrezgene);Acc:838471]
AT1G19020	NA	AT1G19020	NCBI gene (formerly Entrezgene)	CDP-diacylglycerol-glycerol-3-phosphate 3-phosphatidyltransferase [Source:NCBI gene (formerly Entrezgene);Acc:838483]
AT1G19200	NA	AT1G19200	NCBI gene (formerly Entrezgene)	cyclin-dependent kinase, putative (DUF581) [Source:NCBI gene (formerly Entrezgene);Acc:838503]
AT1G19210	NA	AT1G19210	NCBI gene (formerly Entrezgene)	Integrase-type DNA-binding superfamily protein [Source:NCBI gene (formerly Entrezgene);Acc:838504]
AT1G19270	DA1	DA1	NCBI gene (formerly Entrezgene)	DA1 [Source:NCBI gene (formerly Entrezgene);Acc:838510]
AT1G20840	TMT1	TMT1	NCBI gene (formerly Entrezgene)	tonoplast monosaccharide transporter1 [Source:NCBI gene (formerly Entrezgene);Acc:838676]
AT1G20980	SPL14	SPL14	NCBI gene (formerly Entrezgene)	squamosa promoter binding protein-like 14 [Source:NCBI gene (formerly Entrezgene);Acc:838692]
AT1G21000	NA	AT1G21000	NCBI gene (formerly Entrezgene)	PLATZ transcription factor family protein [Source:NCBI gene (formerly Entrezgene);Acc:838694]
AT1G21450	SCL1	SCL1	NCBI gene (formerly Entrezgene)	SCARECROW-like 1 [Source:NCBI gene (formerly Entrezgene);Acc:838743]
AT1G21830	NA	AT1G21830	NCBI gene (formerly Entrezgene)	NA
AT1G21910	DREB26	DREB26	NCBI gene (formerly Entrezgene)	Integrase-type DNA-binding superfamily protein [Source:NCBI gene (formerly Entrezgene);Acc:838793]
AT1G22280	PAPP2C	PAPP2C	NCBI gene (formerly Entrezgene)	phytochrome-associated protein phosphatase type 2C [Source:NCBI gene (formerly Entrezgene);Acc:838835]
AT1G22570	NA	AT1G22570	NCBI gene (formerly Entrezgene)	Major facilitator superfamily protein [Source:NCBI gene (formerly Entrezgene);Acc:838863]
AT1G22890	NA	AT1G22890	NCBI gene (formerly Entrezgene)	transmembrane protein [Source:NCBI gene (formerly Entrezgene);Acc:838896]
AT1G22930	NA	AT1G22930	NCBI gene (formerly Entrezgene)	T-complex protein 11 [Source:NCBI gene (formerly Entrezgene);Acc:838900]
AT1G23040	NA	AT1G23040	NCBI gene (formerly Entrezgene)	hydroxyproline-rich glycoprotein family protein [Source:NCBI gene (formerly Entrezgene);Acc:838912]
AT1G23710	NA	AT1G23710	NCBI gene (formerly Entrezgene)	NA
AT1G23870	ATTPS9	TPS9	NCBI gene (formerly Entrezgene)	trehalose-phosphatase/synthase 9 [Source:NCBI gene (formerly Entrezgene);Acc:838998]
AT1G24140	NA	AT1G24140	NCBI gene (formerly Entrezgene)	Matrixin family protein [Source:NCBI gene (formerly Entrezgene);Acc:839026]
AT1G24145	NA	AT1G24145	NCBI gene (formerly Entrezgene)	transmembrane protein [Source:NCBI gene (formerly Entrezgene);Acc:839027]
AT1G24150	ATFH4	FH4	NCBI gene (formerly Entrezgene)	formin homologue 4 [Source:NCBI gene (formerly Entrezgene);Acc:839028]
AT1G24490	ALB4	ALB4	NCBI gene (formerly Entrezgene)	OxaA/YidC-like membrane insertion protein [Source:NCBI gene (formerly Entrezgene);Acc:839065]
AT1G24530	NA	NA	NA	NA
AT1G25141	NA	AT1G25141	NCBI gene (formerly Entrezgene)	F-box associated ubiquitination effector family protein [Source:NCBI gene (formerly Entrezgene);Acc:839098]
AT1G25277	NA	AT1G25277	NCBI gene (formerly Entrezgene)	NA
AT1G25370	NA	AT1G25370	NCBI gene (formerly Entrezgene)	NA
AT1G25400	NA	AT1G25400	NCBI gene (formerly Entrezgene)	transmembrane protein [Source:NCBI gene (formerly Entrezgene);Acc:839126]
AT1G25500	NA	AT1G25500	NCBI gene (formerly Entrezgene)	Plasma-membrane choline transporter family protein [Source:NCBI gene (formerly Entrezgene);Acc:839136]
AT1G25520	NA	AT1G25520	NCBI gene (formerly Entrezgene)	Uncharacterized protein family (UPF0016) [Source:NCBI gene (formerly Entrezgene);Acc:839138]
AT1G25560	TEM1	TEM1	NCBI gene (formerly Entrezgene)	AP2/B3 transcription factor family protein [Source:NCBI gene (formerly Entrezgene);Acc:839143]
AT1G26800	NA	AT1G26800	NCBI gene (formerly Entrezgene)	RING/U-box superfamily protein [Source:NCBI gene (formerly Entrezgene);Acc:839223]
AT1G27100	NA	AT1G27100	NCBI gene (formerly Entrezgene)	Actin cross-linking protein [Source:NCBI gene (formerly Entrezgene);Acc:839599]
AT1G27290	NA	AT1G27290	NCBI gene (formerly Entrezgene)	transmembrane protein [Source:NCBI gene (formerly Entrezgene);Acc:839618]
AT1G27580	NA	AT1G27580	NCBI gene (formerly Entrezgene)	F-box protein (DUF295) [Source:NCBI gene (formerly Entrezgene);Acc:839649]
AT1G27730	STZ	STZ	NCBI gene (formerly Entrezgene)	salt tolerance zinc finger [Source:NCBI gene (formerly Entrezgene);Acc:839666]
AT1G27760	SAT32	SAT32	NCBI gene (formerly Entrezgene)	interferon-related developmental regulator family protein / IFRD protein family [Source:NCBI gene (formerly Entrezgene);Acc:839669]
AT1G28230	PUP1	PUP1	NCBI gene (formerly Entrezgene)	purine permease 1 [Source:NCBI gene (formerly Entrezgene);Acc:839717]
AT1G28380	NSL1	NSL1	NCBI gene (formerly Entrezgene)	MAC/Perforin domain-containing protein [Source:NCBI gene (formerly Entrezgene);Acc:839735]
AT1G28570	NA	AT1G28570	NCBI gene (formerly Entrezgene)	SGNH hydrolase-type esterase superfamily protein [Source:NCBI gene (formerly Entrezgene);Acc:839757]
AT1G28600	NA	AT1G28600	NCBI gene (formerly Entrezgene)	GDSL-like Lipase/Acylhydrolase superfamily protein [Source:NCBI gene (formerly Entrezgene);Acc:839760]
AT1G29290	NA	AT1G29290	NCBI gene (formerly Entrezgene)	B-cell lymphoma 6 protein [Source:NCBI gene (formerly Entrezgene);Acc:28717277]
AT1G29340	PUB17	PUB17	NCBI gene (formerly Entrezgene)	plant U-box 17 [Source:NCBI gene (formerly Entrezgene);Acc:839808]
AT1G29690	CAD1	CAD1	NCBI gene (formerly Entrezgene)	MAC/Perforin domain-containing protein [Source:NCBI gene (formerly Entrezgene);Acc:839846]
AT1G29970	RPL18AA	RPL18AA	NCBI gene (formerly Entrezgene)	60S ribosomal protein L18A-1 [Source:NCBI gene (formerly Entrezgene);Acc:839876]
AT1G30220	ATINT2	INT2	NCBI gene (formerly Entrezgene)	inositol transporter 2 [Source:NCBI gene (formerly Entrezgene);Acc:839902]
AT1G30400	ATMRP1	ABCC1	NCBI gene (formerly Entrezgene)	multidrug resistance-associated protein 1 [Source:NCBI gene (formerly Entrezgene);Acc:839920]
AT1G30475	NA	AT1G30475	NCBI gene (formerly Entrezgene)	NA
AT1G30755	NA	AT1G30755	NCBI gene (formerly Entrezgene)	elongation factor G, putative (DUF668) [Source:NCBI gene (formerly Entrezgene);Acc:839956]
AT1G30810	NA	JMJ18	NCBI gene (formerly Entrezgene)	Transcription factor jumonji (jmj) family protein / zinc finger (C5HC2 type) family protein [Source:NCBI gene (formerly Entrezgene);Acc:839963]
AT1G30970	SUF4	SUF4	NCBI gene (formerly Entrezgene)	zinc finger (C2H2 type) family protein [Source:NCBI gene (formerly Entrezgene);Acc:839984]
AT1G31130	NA	AT1G31130	NCBI gene (formerly Entrezgene)	polyadenylate-binding protein 1-B-binding protein [Source:NCBI gene (formerly Entrezgene);Acc:839998]
AT1G31820	NA	PUT1	NCBI gene (formerly Entrezgene)	Amino acid permease family protein [Source:NCBI gene (formerly Entrezgene);Acc:840072]
AT1G32170	XTR4	XTH30	NCBI gene (formerly Entrezgene)	xyloglucan endotransglucosylase/hydrolase 30 [Source:NCBI gene (formerly Entrezgene);Acc:840109]
AT1G32350	AOX1D	AOX1D	NCBI gene (formerly Entrezgene)	alternative oxidase 1D [Source:NCBI gene (formerly Entrezgene);Acc:840127]
AT1G32530	NA	AT1G32530	NCBI gene (formerly Entrezgene)	RING/U-box superfamily protein [Source:NCBI gene (formerly Entrezgene);Acc:840147]
AT1G33030	NA	AT1G33030	NCBI gene (formerly Entrezgene)	O-methyltransferase family protein [Source:NCBI gene (formerly Entrezgene);Acc:840198]
AT1G33050	NA	AT1G33050	NCBI gene (formerly Entrezgene)	NA
AT1G33102	NA	AT1G33102	NCBI gene (formerly Entrezgene)	NA
AT1G33110	NA	AT1G33110	NCBI gene (formerly Entrezgene)	MATE efflux family protein [Source:NCBI gene (formerly Entrezgene);Acc:840207]
AT1G33980	ATUPF3	UPF3	NCBI gene (formerly Entrezgene)	Smg-4/UPF3 family protein [Source:NCBI gene (formerly Entrezgene);Acc:840295]
AT1G34060	NA	AT1G34060	NCBI gene (formerly Entrezgene)	Pyridoxal phosphate (PLP)-dependent transferases superfamily protein [Source:NCBI gene (formerly Entrezgene);Acc:840303]
AT1G34180	anac016	NAC016	NCBI gene (formerly Entrezgene)	NAC domain containing protein 16 [Source:NCBI gene (formerly Entrezgene);Acc:840317]
AT1G34260	FAB1D	FAB1D	NCBI gene (formerly Entrezgene)	FORMS APLOID AND BINUCLEATE CELLS 1A [Source:NCBI gene (formerly Entrezgene);Acc:840326]
AT1G34300	NA	AT1G34300	NCBI gene (formerly Entrezgene)	lectin protein kinase family protein [Source:NCBI gene (formerly Entrezgene);Acc:840330]
AT1G35140	PHI-1	PHI-1	NCBI gene (formerly Entrezgene)	Phosphate-responsive 1 family protein [Source:NCBI gene (formerly Entrezgene);Acc:840399]
AT1G35210	NA	AT1G35210	NCBI gene (formerly Entrezgene)	NA
AT1G35350	NA	AT1G35350	NCBI gene (formerly Entrezgene)	EXS (ERD1/XPR1/SYG1) family protein [Source:NCBI gene (formerly Entrezgene);Acc:840424]
AT1G42990	ATBZIP60	BZIP60	NCBI gene (formerly Entrezgene)	basic region/leucine zipper motif 60 [Source:NCBI gene (formerly Entrezgene);Acc:840897]
AT1G43700	VIP1	VIP1	NCBI gene (formerly Entrezgene)	VIRE2-interacting protein 1 [Source:NCBI gene (formerly Entrezgene);Acc:840957]
AT1G44770	NA	AT1G44770	NCBI gene (formerly Entrezgene)	elongation factor [Source:NCBI gene (formerly Entrezgene);Acc:841041]
AT1G45150	NA	AT1G45150	NCBI gene (formerly Entrezgene)	alpha-1,6-mannosyl-glycoprotein 2-beta-N-acetylglucosaminyltransferase [Source:NCBI gene (formerly Entrezgene);Acc:841083]
AT1G48000	MYB112	MYB112	NCBI gene (formerly Entrezgene)	myb domain protein 112 [Source:NCBI gene (formerly Entrezgene);Acc:841218]
AT1G48430	NA	AT1G48430	NCBI gene (formerly Entrezgene)	Dihydroxyacetone kinase [Source:NCBI gene (formerly Entrezgene);Acc:841264]
AT1G48490	NA	AT1G48490	NCBI gene (formerly Entrezgene)	Protein kinase superfamily protein [Source:NCBI gene (formerly Entrezgene);Acc:841270]
AT1G49360	NA	AT1G49360	NCBI gene (formerly Entrezgene)	F-box family protein [Source:NCBI gene (formerly Entrezgene);Acc:841359]
AT1G50570	NA	AT1G50570	NCBI gene (formerly Entrezgene)	Calcium-dependent lipid-binding (CaLB domain) family protein [Source:NCBI gene (formerly Entrezgene);Acc:841478]
AT1G51660	ATMKK4	MKK4	NCBI gene (formerly Entrezgene)	mitogen-activated protein kinase kinase 4 [Source:NCBI gene (formerly Entrezgene);Acc:841591]
AT1G52000	NA	AT1G52000	NCBI gene (formerly Entrezgene)	Mannose-binding lectin superfamily protein [Source:NCBI gene (formerly Entrezgene);Acc:841629]
AT1G53100	NA	AT1G53100	NCBI gene (formerly Entrezgene)	Core-2/I-branching beta-1,6-N-acetylglucosaminyltransferase family protein [Source:NCBI gene (formerly Entrezgene);Acc:841744]
AT1G53430	NA	AT1G53430	NCBI gene (formerly Entrezgene)	Leucine-rich repeat transmembrane protein kinase [Source:NCBI gene (formerly Entrezgene);Acc:841778]
AT1G53780	NA	AT1G53780	NCBI gene (formerly Entrezgene)	26S proteasome regulatory complex ATPase [Source:NCBI gene (formerly Entrezgene);Acc:841815]
AT1G53910	RAP2.12	RAP2.12	NCBI gene (formerly Entrezgene)	related to AP2 12 [Source:NCBI gene (formerly Entrezgene);Acc:841829]
AT1G54090	ATEXO70D2	EXO70D2	NCBI gene (formerly Entrezgene)	exocyst subunit exo70 family protein D2 [Source:NCBI gene (formerly Entrezgene);Acc:841847]
AT1G54100	ALDH7B4	ALDH7B4	NCBI gene (formerly Entrezgene)	aldehyde dehydrogenase 7B4 [Source:NCBI gene (formerly Entrezgene);Acc:841849]
AT1G54130	RSH3	RSH3	NCBI gene (formerly Entrezgene)	RELA/SPOT homolog 3 [Source:NCBI gene (formerly Entrezgene);Acc:841853]
AT1G54210	ATG12A	ATG12A	NCBI gene (formerly Entrezgene)	Ubiquitin-like superfamily protein [Source:NCBI gene (formerly Entrezgene);Acc:841861]
AT1G54575	NA	AT1G54575	NCBI gene (formerly Entrezgene)	NA
AT1G55110	AtIDD7	IDD7	NCBI gene (formerly Entrezgene)	indeterminate(ID)-domain 7 [Source:NCBI gene (formerly Entrezgene);Acc:841954]
AT1G55265	NA	AT1G55265	NCBI gene (formerly Entrezgene)	DUF538 family protein, putative (Protein of unknown function, DUF538) [Source:NCBI gene (formerly Entrezgene);Acc:841971]
AT1G55730	ATCAX5	CAX5	NCBI gene (formerly Entrezgene)	cation exchanger 5 [Source:NCBI gene (formerly Entrezgene);Acc:842022]
AT1G56010	NAC1	NAC1	NCBI gene (formerly Entrezgene)	NAC domain containing protein 1 [Source:NCBI gene (formerly Entrezgene);Acc:842052]
AT1G56140	NA	AT1G56140	NCBI gene (formerly Entrezgene)	Leucine-rich repeat transmembrane protein kinase [Source:NCBI gene (formerly Entrezgene);Acc:842066]
AT1G56145	NA	AT1G56145	NCBI gene (formerly Entrezgene)	Leucine-rich repeat transmembrane protein kinase [Source:NCBI gene (formerly Entrezgene);Acc:842067]
AT1G56280	ATDI19	DI19	NCBI gene (formerly Entrezgene)	drought-induced 19 [Source:NCBI gene (formerly Entrezgene);Acc:842081]
AT1G56460	NA	AT1G56460	NCBI gene (formerly Entrezgene)	HIT zinc finger and PAPA-1-like domain-containing protein [Source:NCBI gene (formerly Entrezgene);Acc:842099]
AT1G56650	PAP1	PAP1	NCBI gene (formerly Entrezgene)	production of anthocyanin pigment 1 [Source:NCBI gene (formerly Entrezgene);Acc:842120]
AT1G57590	NA	AT1G57590	NCBI gene (formerly Entrezgene)	Pectinacetylesterase family protein [Source:NCBI gene (formerly Entrezgene);Acc:842135]
AT1G58235	NA	AT1G58235	NCBI gene (formerly Entrezgene)	NA
AT1G58420	NA	AT1G58420	NCBI gene (formerly Entrezgene)	Uncharacterized conserved protein UCP031279 [Source:NCBI gene (formerly Entrezgene);Acc:842211]
AT1G59590	ZCF37	ZCF37	NCBI gene (formerly Entrezgene)	ZCF37 [Source:NCBI gene (formerly Entrezgene);Acc:842249]
AT1G59620	CW9	CW9	NCBI gene (formerly Entrezgene)	Disease resistance protein (CC-NBS-LRR class) family [Source:NCBI gene (formerly Entrezgene);Acc:842252]
AT1G59910	NA	AT1G59910	NCBI gene (formerly Entrezgene)	Actin-binding FH2 (formin homology 2) family protein [Source:NCBI gene (formerly Entrezgene);Acc:842285]
AT1G60730	NA	AT1G60730	NCBI gene (formerly Entrezgene)	NAD(P)-linked oxidoreductase superfamily protein [Source:NCBI gene (formerly Entrezgene);Acc:842367]
AT1G60900	NA	AT1G60900	NCBI gene (formerly Entrezgene)	U2 snRNP auxilliary factor, large subunit, splicing factor [Source:NCBI gene (formerly Entrezgene);Acc:842382]
AT1G61800	GPT2	GPT2	NCBI gene (formerly Entrezgene)	glucose-6-phosphate/phosphate translocator 2 [Source:NCBI gene (formerly Entrezgene);Acc:842477]
AT1G62422	NA	AT1G62422	NCBI gene (formerly Entrezgene)	NA
AT1G62810	NA	CuAO1	NCBI gene (formerly Entrezgene)	Copper amine oxidase family protein [Source:NCBI gene (formerly Entrezgene);Acc:842580]
AT1G63010	NA	AT1G63010	NCBI gene (formerly Entrezgene)	Major Facilitator Superfamily with SPX (SYG1/Pho81/XPR1) domain-containing protein [Source:NCBI gene (formerly Entrezgene);Acc:842604]
AT1G63350	NA	AT1G63350	NCBI gene (formerly Entrezgene)	Disease resistance protein (CC-NBS-LRR class) family [Source:NCBI gene (formerly Entrezgene);Acc:842641]
AT1G63370	NA	AT1G63370	NCBI gene (formerly Entrezgene)	Flavin-binding monooxygenase family protein [Source:NCBI gene (formerly Entrezgene);Acc:842643]
AT1G63840	NA	AT1G63840	NCBI gene (formerly Entrezgene)	RING/U-box superfamily protein [Source:NCBI gene (formerly Entrezgene);Acc:842687]
AT1G64065	NA	AT1G64065	NCBI gene (formerly Entrezgene)	Late embryosis abundant (LEA) hydroxyproline-rich glycoprotein family [Source:NCBI gene (formerly Entrezgene);Acc:2745848]
AT1G64280	NPR1	NPR1	NCBI gene (formerly Entrezgene)	regulatory protein (NPR1) [Source:NCBI gene (formerly Entrezgene);Acc:842733]
AT1G64610	NA	AT1G64610	NCBI gene (formerly Entrezgene)	Transducin/WD40 repeat-like superfamily protein [Source:NCBI gene (formerly Entrezgene);Acc:842769]
AT1G64840	NA	AT1G64840	NCBI gene (formerly Entrezgene)	LOW protein: F-box/kelch-repeat protein (DUF295) [Source:NCBI gene (formerly Entrezgene);Acc:842792]
AT1G64950	CYP89A5	CYP89A5	NCBI gene (formerly Entrezgene)	cytochrome P450, family 89, subfamily A, polypeptide 5 [Source:NCBI gene (formerly Entrezgene);Acc:842803]
AT1G64970	G-TMT	G-TMT	NCBI gene (formerly Entrezgene)	gamma-tocopherol methyltransferase [Source:NCBI gene (formerly Entrezgene);Acc:842805]
AT1G65250	NA	AT1G65250	NCBI gene (formerly Entrezgene)	Protein kinase superfamily protein [Source:NCBI gene (formerly Entrezgene);Acc:842832]
AT1G65690	NA	AT1G65690	NCBI gene (formerly Entrezgene)	Late embryosis abundant (LEA) hydroxyproline-rich glycoprotein family [Source:NCBI gene (formerly Entrezgene);Acc:842880]
AT1G65790	ARK1	RK1	NCBI gene (formerly Entrezgene)	receptor kinase 1 [Source:NCBI gene (formerly Entrezgene);Acc:842890]
AT1G65820	NA	AT1G65820	NCBI gene (formerly Entrezgene)	microsomal glutathione s-transferase [Source:NCBI gene (formerly Entrezgene);Acc:842893]
AT1G66090	NA	AT1G66090	NCBI gene (formerly Entrezgene)	Disease resistance protein (TIR-NBS class) [Source:NCBI gene (formerly Entrezgene);Acc:842923]
AT1G67650	NA	AT1G67650	NCBI gene (formerly Entrezgene)	SRP72 RNA-binding domain-containing protein [Source:NCBI gene (formerly Entrezgene);Acc:843090]
AT1G67920	NA	AT1G67920	NCBI gene (formerly Entrezgene)	NA
AT1G68000	ATPIS1	PIS1	NCBI gene (formerly Entrezgene)	phosphatidylinositol synthase 1 [Source:NCBI gene (formerly Entrezgene);Acc:843128]
AT1G68520	NA	BBX14	NCBI gene (formerly Entrezgene)	B-box type zinc finger protein with CCT domain-containing protein [Source:NCBI gene (formerly Entrezgene);Acc:843181]
AT1G68690	NA	PERK9	NCBI gene (formerly Entrezgene)	Protein kinase superfamily protein [Source:NCBI gene (formerly Entrezgene);Acc:3767664]
AT1G69270	RPK1	RPK1	NCBI gene (formerly Entrezgene)	receptor-like protein kinase 1 [Source:NCBI gene (formerly Entrezgene);Acc:843258]
AT1G69310	WRKY57	WRKY57	NCBI gene (formerly Entrezgene)	WRKY DNA-binding protein 57 [Source:NCBI gene (formerly Entrezgene);Acc:843262]
AT1G69450	NA	AT1G69450	NCBI gene (formerly Entrezgene)	Early-responsive to dehydration stress protein (ERD4) [Source:NCBI gene (formerly Entrezgene);Acc:843277]
AT1G69480	NA	AT1G69480	NCBI gene (formerly Entrezgene)	EXS (ERD1/XPR1/SYG1) family protein [Source:NCBI gene (formerly Entrezgene);Acc:843280]
AT1G69490	NAP	NAP	NCBI gene (formerly Entrezgene)	NAC-like, activated by AP3/PI [Source:NCBI gene (formerly Entrezgene);Acc:843282]
AT1G69640	SBH1	SBH1	NCBI gene (formerly Entrezgene)	sphingoid base hydroxylase 1 [Source:NCBI gene (formerly Entrezgene);Acc:843300]
AT1G69810	WRKY36	WRKY36	NCBI gene (formerly Entrezgene)	WRKY DNA-binding protein 36 [Source:NCBI gene (formerly Entrezgene);Acc:843317]
AT1G69840	NA	AT1G69840	NCBI gene (formerly Entrezgene)	SPFH/Band 7/PHB domain-containing membrane-associated protein family [Source:NCBI gene (formerly Entrezgene);Acc:843320]
AT1G69870	NRT1.7	NRT1.7	NCBI gene (formerly Entrezgene)	nitrate transporter 1.7 [Source:NCBI gene (formerly Entrezgene);Acc:843323]
AT1G69890	NA	AT1G69890	NCBI gene (formerly Entrezgene)	actin cross-linking protein (DUF569) [Source:NCBI gene (formerly Entrezgene);Acc:843325]
AT1G69900	NA	AT1G69900	NCBI gene (formerly Entrezgene)	Actin cross-linking protein [Source:NCBI gene (formerly Entrezgene);Acc:843326]
AT1G70290	ATTPS8	TPS8	NCBI gene (formerly Entrezgene)	trehalose-6-phosphatase synthase S8 [Source:NCBI gene (formerly Entrezgene);Acc:843365]
AT1G70520	CRK2	CRK2	NCBI gene (formerly Entrezgene)	cysteine-rich RLK (RECEPTOR-like protein kinase) 2 [Source:NCBI gene (formerly Entrezgene);Acc:843389]
AT1G70530	CRK3	CRK3	NCBI gene (formerly Entrezgene)	cysteine-rich RLK (RECEPTOR-like protein kinase) 3 [Source:NCBI gene (formerly Entrezgene);Acc:843390]
AT1G71040	LPR2	LPR2	NCBI gene (formerly Entrezgene)	Cupredoxin superfamily protein [Source:NCBI gene (formerly Entrezgene);Acc:843444]
AT1G71800	CSTF64	CSTF64	NCBI gene (formerly Entrezgene)	cleavage stimulating factor 64 [Source:NCBI gene (formerly Entrezgene);Acc:843510]
AT1G71910	NA	AT1G71910	NCBI gene (formerly Entrezgene)	NA
AT1G72150	PATL1	PATL1	NCBI gene (formerly Entrezgene)	PATELLIN 1 [Source:NCBI gene (formerly Entrezgene);Acc:843546]
AT1G72800	NA	AT1G72800	NCBI gene (formerly Entrezgene)	RNA-binding (RRM/RBD/RNP motifs) family protein [Source:NCBI gene (formerly Entrezgene);Acc:843611]
AT1G72840	NA	AT1G72840	NCBI gene (formerly Entrezgene)	Disease resistance protein (TIR-NBS-LRR class) [Source:NCBI gene (formerly Entrezgene);Acc:843615]
AT1G72900	NA	AT1G72900	NCBI gene (formerly Entrezgene)	Toll-Interleukin-Resistance (TIR) domain-containing protein [Source:NCBI gene (formerly Entrezgene);Acc:843621]
AT1G72930	TIR	TIR	NCBI gene (formerly Entrezgene)	toll/interleukin-1 receptor-like protein [Source:NCBI gene (formerly Entrezgene);Acc:843624]
AT1G73040	NA	AT1G73040	NCBI gene (formerly Entrezgene)	Mannose-binding lectin superfamily protein [Source:NCBI gene (formerly Entrezgene);Acc:843635]
AT1G73130	NA	AT1G73130	NCBI gene (formerly Entrezgene)	mucin [Source:NCBI gene (formerly Entrezgene);Acc:843644]
AT1G73500	ATMKK9	MKK9	NCBI gene (formerly Entrezgene)	MAP kinase kinase 9 [Source:NCBI gene (formerly Entrezgene);Acc:843685]
AT1G73700	NA	AT1G73700	NCBI gene (formerly Entrezgene)	MATE efflux family protein [Source:NCBI gene (formerly Entrezgene);Acc:843705]
AT1G73810	NA	AT1G73810	NCBI gene (formerly Entrezgene)	Core-2/I-branching beta-1,6-N-acetylglucosaminyltransferase family protein [Source:NCBI gene (formerly Entrezgene);Acc:843717]
AT1G74010	NA	AT1G74010	NCBI gene (formerly Entrezgene)	Calcium-dependent phosphotriesterase superfamily protein [Source:NCBI gene (formerly Entrezgene);Acc:843739]
AT1G74020	SS2	SS2	NCBI gene (formerly Entrezgene)	strictosidine synthase 2 [Source:NCBI gene (formerly Entrezgene);Acc:843740]
AT1G74810	BOR5	BOR5	NCBI gene (formerly Entrezgene)	HCO3- transporter family [Source:NCBI gene (formerly Entrezgene);Acc:843820]
AT1G74940	NA	AT1G74940	NCBI gene (formerly Entrezgene)	cyclin-dependent kinase, putative (DUF581) [Source:NCBI gene (formerly Entrezgene);Acc:843833]
AT1G75020	LPAT4	LPAT4	NCBI gene (formerly Entrezgene)	lysophosphatidyl acyltransferase 4 [Source:NCBI gene (formerly Entrezgene);Acc:843840]
AT1G75380	ATBBD1	BBD1	NCBI gene (formerly Entrezgene)	bifunctional nuclease in basal defense response 1 [Source:NCBI gene (formerly Entrezgene);Acc:843874]
AT1G76360	NA	AT1G76360	NCBI gene (formerly Entrezgene)	Protein kinase superfamily protein [Source:NCBI gene (formerly Entrezgene);Acc:843968]
AT1G76520	NA	AT1G76520	NCBI gene (formerly Entrezgene)	Auxin efflux carrier family protein [Source:NCBI gene (formerly Entrezgene);Acc:843985]
AT1G76820	NA	NA	NA	NA
AT1G76955	NA	AT1G76955	NCBI gene (formerly Entrezgene)	Expressed protein [Source:NCBI gene (formerly Entrezgene);Acc:2745854]
AT1G77500	NA	AT1G77500	NCBI gene (formerly Entrezgene)	DUF630 family protein, putative (DUF630 and DUF632) [Source:NCBI gene (formerly Entrezgene);Acc:844086]
AT1G77640	NA	AT1G77640	NCBI gene (formerly Entrezgene)	Integrase-type DNA-binding superfamily protein [Source:NCBI gene (formerly Entrezgene);Acc:844099]
AT1G77920	NA	TGA7	NCBI gene (formerly Entrezgene)	bZIP transcription factor family protein [Source:NCBI gene (formerly Entrezgene);Acc:844127]
AT1G78190	NA	AT1G78190	NCBI gene (formerly Entrezgene)	Trm112p-like protein [Source:NCBI gene (formerly Entrezgene);Acc:844155]
AT1G78420	NA	AT1G78420	NCBI gene (formerly Entrezgene)	RING/U-box superfamily protein [Source:NCBI gene (formerly Entrezgene);Acc:844178]
AT1G78670	ATGGH3	GGH3	NCBI gene (formerly Entrezgene)	gamma-glutamyl hydrolase 3 [Source:NCBI gene (formerly Entrezgene);Acc:844203]
AT1G78780	NA	AT1G78780	NCBI gene (formerly Entrezgene)	pathosis-related family protein [Source:NCBI gene (formerly Entrezgene);Acc:844214]
AT1G79270	ECT8	ECT8	NCBI gene (formerly Entrezgene)	evolutionarily conserved C-terminal region 8 [Source:NCBI gene (formerly Entrezgene);Acc:844267]
AT1G79380	NA	RGLG4	NCBI gene (formerly Entrezgene)	Ca(2)-dependent phospholipid-binding protein (Copine) family [Source:NCBI gene (formerly Entrezgene);Acc:844276]
AT1G79610	ATNHX6	NHX6	NCBI gene (formerly Entrezgene)	Na+/H+ antiporter 6 [Source:NCBI gene (formerly Entrezgene);Acc:844299]
AT1G80010	FRS8	FRS8	NCBI gene (formerly Entrezgene)	FAR1-related sequence 8 [Source:NCBI gene (formerly Entrezgene);Acc:844341]
AT1G80160	NA	GLYI7	NCBI gene (formerly Entrezgene)	Lactoylglutathione lyase / glyoxalase I family protein [Source:NCBI gene (formerly Entrezgene);Acc:844356]
AT1G80180	NA	AT1G80180	NCBI gene (formerly Entrezgene)	NA
AT1G80300	NTT1	NTT1	NCBI gene (formerly Entrezgene)	nucleotide transporter 1 [Source:NCBI gene (formerly Entrezgene);Acc:844370]
AT1G80510	NA	AT1G80510	NCBI gene (formerly Entrezgene)	Transmembrane amino acid transporter family protein [Source:NCBI gene (formerly Entrezgene);Acc:844390]
AT1G80610	NA	AT1G80610	NCBI gene (formerly Entrezgene)	NA
AT1G80840	WRKY40	WRKY40	NCBI gene (formerly Entrezgene)	WRKY DNA-binding protein 40 [Source:NCBI gene (formerly Entrezgene);Acc:844423]
AT1G80910	NA	AT1G80910	NCBI gene (formerly Entrezgene)	vacuolar fusion CCZ1-like protein (DUF1712) [Source:NCBI gene (formerly Entrezgene);Acc:844431]
AT2G01450	ATMPK17	MPK17	NCBI gene (formerly Entrezgene)	MAP kinase 17 [Source:NCBI gene (formerly Entrezgene);Acc:814673]
AT2G01600	NA	AT2G01600	NCBI gene (formerly Entrezgene)	ENTH/ANTH/VHS superfamily protein [Source:NCBI gene (formerly Entrezgene);Acc:814689]
AT2G01850	EXGT-A3	EXGT-A3	NCBI gene (formerly Entrezgene)	endoxyloglucan transferase A3 [Source:NCBI gene (formerly Entrezgene);Acc:814716]
AT2G02370	NA	AT2G02370	NCBI gene (formerly Entrezgene)	SNARE associated Golgi protein family [Source:NCBI gene (formerly Entrezgene);Acc:814768]
AT2G02390	ATGSTZ1	GSTZ1	NCBI gene (formerly Entrezgene)	glutathione S-transferase zeta 1 [Source:NCBI gene (formerly Entrezgene);Acc:814770]
AT2G02710	PLP	PLPB	NCBI gene (formerly Entrezgene)	PAS/LOV protein B [Source:NCBI gene (formerly Entrezgene);Acc:814800]
AT2G02950	PKS1	PKS1	NCBI gene (formerly Entrezgene)	phytochrome kinase substrate 1 [Source:NCBI gene (formerly Entrezgene);Acc:814823]
AT2G03530	UPS2	UPS2	NCBI gene (formerly Entrezgene)	ureide permease 2 [Source:NCBI gene (formerly Entrezgene);Acc:814882]
AT2G04495	NA	AT2G04495	NCBI gene (formerly Entrezgene)	transmembrane protein [Source:NCBI gene (formerly Entrezgene);Acc:814990]
AT2G07718	NA	AT2G07718	NCBI gene (formerly Entrezgene)	Cytochrome b/b6 protein [Source:NCBI gene (formerly Entrezgene);Acc:28717841]
AT2G11520	CRCK3	CRCK3	NCBI gene (formerly Entrezgene)	calmodulin-binding receptor-like cytoplasmic kinase 3 [Source:NCBI gene (formerly Entrezgene);Acc:815625]
AT2G14080	NA	AT2G14080	NCBI gene (formerly Entrezgene)	Disease resistance protein (TIR-NBS-LRR class) family [Source:NCBI gene (formerly Entrezgene);Acc:815893]
AT2G15042	NA	AT2G15042	NCBI gene (formerly Entrezgene)	Leucine-rich repeat (LRR) family protein [Source:NCBI gene (formerly Entrezgene);Acc:7922469]
AT2G15390	FUT4	FUT4	NCBI gene (formerly Entrezgene)	fucosyltransferase 4 [Source:NCBI gene (formerly Entrezgene);Acc:816031]
AT2G15480	UGT73B5	UGT73B5	NCBI gene (formerly Entrezgene)	UDP-glucosyl transferase 73B5 [Source:NCBI gene (formerly Entrezgene);Acc:816040]
AT2G17040	anac036	NAC036	NCBI gene (formerly Entrezgene)	NAC domain containing protein 36 [Source:NCBI gene (formerly Entrezgene);Acc:816209]
AT2G17290	CPK6	CPK6	NCBI gene (formerly Entrezgene)	Calcium-dependent protein kinase family protein [Source:NCBI gene (formerly Entrezgene);Acc:816235]
AT2G17500	NA	AT2G17500	NCBI gene (formerly Entrezgene)	Auxin efflux carrier family protein [Source:NCBI gene (formerly Entrezgene);Acc:816256]
AT2G17705	NA	AT2G17705	NCBI gene (formerly Entrezgene)	methionine-S-oxide reductase [Source:NCBI gene (formerly Entrezgene);Acc:816279]
AT2G17760	NA	AT2G17760	NCBI gene (formerly Entrezgene)	Eukaryotic aspartyl protease family protein [Source:NCBI gene (formerly Entrezgene);Acc:816285]
AT2G17787	NA	AT2G17787	NCBI gene (formerly Entrezgene)	cylicin [Source:NCBI gene (formerly Entrezgene);Acc:2745546]
AT2G18670	NA	AT2G18670	NCBI gene (formerly Entrezgene)	RING/U-box superfamily protein [Source:NCBI gene (formerly Entrezgene);Acc:816382]
AT2G18700	ATTPS11	TPS11	NCBI gene (formerly Entrezgene)	trehalose phosphatase/synthase 11 [Source:NCBI gene (formerly Entrezgene);Acc:816385]
AT2G18950	HPT1	HPT1	NCBI gene (formerly Entrezgene)	homogentisate phytyltransferase 1 [Source:NCBI gene (formerly Entrezgene);Acc:816412]
AT2G19130	NA	AT2G19130	NCBI gene (formerly Entrezgene)	S-locus lectin protein kinase family protein [Source:NCBI gene (formerly Entrezgene);Acc:816430]
AT2G19710	NA	AT2G19710	NCBI gene (formerly Entrezgene)	Regulator of Vps4 activity in the MVB pathway protein [Source:NCBI gene (formerly Entrezgene);Acc:816490]
AT2G20142	NA	AT2G20142	NCBI gene (formerly Entrezgene)	Toll-Interleukin-Resistance (TIR) domain family protein [Source:NCBI gene (formerly Entrezgene);Acc:2745551]
AT2G20310	RIN13	RIN13	NCBI gene (formerly Entrezgene)	RPM1 interacting protein 13 [Source:NCBI gene (formerly Entrezgene);Acc:816550]
AT2G20560	NA	AT2G20560	NCBI gene (formerly Entrezgene)	DNAJ heat shock family protein [Source:NCBI gene (formerly Entrezgene);Acc:816578]
AT2G20900	DGK5	DGK5	NCBI gene (formerly Entrezgene)	diacylglycerol kinase 5 [Source:NCBI gene (formerly Entrezgene);Acc:816624]
AT2G20960	pEARLI4	pEARLI4	NCBI gene (formerly Entrezgene)	phospholipase-like protein (PEARLI 4) family protein [Source:NCBI gene (formerly Entrezgene);Acc:816630]
AT2G21500	NA	AT2G21500	NCBI gene (formerly Entrezgene)	RING/U-box superfamily protein [Source:NCBI gene (formerly Entrezgene);Acc:816689]
AT2G21620	RD2	RD2	NCBI gene (formerly Entrezgene)	Adenine nucleotide alpha hydrolases-like superfamily protein [Source:NCBI gene (formerly Entrezgene);Acc:816700]
AT2G22300	CAMTA3	SR1	NCBI gene (formerly Entrezgene)	signal responsive 1 [Source:NCBI gene (formerly Entrezgene);Acc:816762]
AT2G23810	TET8	TET8	NCBI gene (formerly Entrezgene)	tetraspanin8 [Source:NCBI gene (formerly Entrezgene);Acc:816913]
AT2G24240	NA	AT2G24240	NCBI gene (formerly Entrezgene)	BTB/POZ domain with WD40/YVTN repeat-like protein [Source:NCBI gene (formerly Entrezgene);Acc:816958]
AT2G24550	NA	AT2G24550	NCBI gene (formerly Entrezgene)	major centromere autoantigen B-like protein [Source:NCBI gene (formerly Entrezgene);Acc:816991]
AT2G25200	NA	AT2G25200	NCBI gene (formerly Entrezgene)	NA
AT2G26230	NA	AT2G26230	NCBI gene (formerly Entrezgene)	uricase / urate oxidase / nodulin 35 [Source:NCBI gene (formerly Entrezgene);Acc:817163]
AT2G26560	PLP2	PLA2A	NCBI gene (formerly Entrezgene)	phospholipase A 2A [Source:NCBI gene (formerly Entrezgene);Acc:817197]
AT2G27090	NA	AT2G27090	NCBI gene (formerly Entrezgene)	bZIP transcription factor (DUF630 and DUF632) [Source:NCBI gene (formerly Entrezgene);Acc:817251]
AT2G27500	NA	AT2G27500	NCBI gene (formerly Entrezgene)	Glycosyl hydrolase superfamily protein [Source:NCBI gene (formerly Entrezgene);Acc:817295]
AT2G28110	FRA8	FRA8	NCBI gene (formerly Entrezgene)	Exostosin family protein [Source:NCBI gene (formerly Entrezgene);Acc:817357]
AT2G28120	NA	AT2G28120	NCBI gene (formerly Entrezgene)	Major facilitator superfamily protein [Source:NCBI gene (formerly Entrezgene);Acc:817358]
AT2G28400	NA	AT2G28400	NCBI gene (formerly Entrezgene)	senescence regulator (Protein of unknown function, DUF584) [Source:NCBI gene (formerly Entrezgene);Acc:817388]
AT2G28500	LBD11	LBD11	NCBI gene (formerly Entrezgene)	LOB domain-containing protein 11 [Source:NCBI gene (formerly Entrezgene);Acc:817398]
AT2G29350	SAG13	SAG13	NCBI gene (formerly Entrezgene)	senescence-associated 13 [Source:NCBI gene (formerly Entrezgene);Acc:817484]
AT2G30020	NA	AT2G30020	NCBI gene (formerly Entrezgene)	Protein phosphatase 2C family protein [Source:NCBI gene (formerly Entrezgene);Acc:817553]
AT2G30250	WRKY25	WRKY25	NCBI gene (formerly Entrezgene)	WRKY DNA-binding protein 25 [Source:NCBI gene (formerly Entrezgene);Acc:817575]
AT2G30440	TPP	TPP	NCBI gene (formerly Entrezgene)	thylakoid processing peptide [Source:NCBI gene (formerly Entrezgene);Acc:817595]
AT2G30840	NA	AT2G30840	NCBI gene (formerly Entrezgene)	2-oxoglutarate (2OG) and Fe(II)-dependent oxygenase superfamily protein [Source:NCBI gene (formerly Entrezgene);Acc:817635]
AT2G31800	NA	AT2G31800	NCBI gene (formerly Entrezgene)	Integrin-linked protein kinase family [Source:NCBI gene (formerly Entrezgene);Acc:817737]
AT2G31880	SOBIR1	SOBIR1	NCBI gene (formerly Entrezgene)	Leucine-rich repeat protein kinase family protein [Source:NCBI gene (formerly Entrezgene);Acc:817746]
AT2G31945	NA	AT2G31945	NCBI gene (formerly Entrezgene)	transmembrane protein [Source:NCBI gene (formerly Entrezgene);Acc:817753]
AT2G31990	NA	AT2G31990	NCBI gene (formerly Entrezgene)	Exostosin family protein [Source:NCBI gene (formerly Entrezgene);Acc:817758]
AT2G32140	NA	AT2G32140	NCBI gene (formerly Entrezgene)	transmembrane receptor [Source:NCBI gene (formerly Entrezgene);Acc:817773]
AT2G32200	NA	AT2G32200	NCBI gene (formerly Entrezgene)	cysteine-rich/transmembrane domain A-like protein [Source:NCBI gene (formerly Entrezgene);Acc:817779]
AT2G32660	AtRLP22	RLP22	NCBI gene (formerly Entrezgene)	receptor like protein 22 [Source:NCBI gene (formerly Entrezgene);Acc:817826]
AT2G32800	AP4.3A	AP4.3A	NCBI gene (formerly Entrezgene)	protein kinase family protein [Source:NCBI gene (formerly Entrezgene);Acc:817841]
AT2G32830	PHT5	PHT1;5	NCBI gene (formerly Entrezgene)	phosphate transporter 1;5 [Source:NCBI gene (formerly Entrezgene);Acc:817844]
AT2G33080	AtRLP28	RLP28	NCBI gene (formerly Entrezgene)	receptor like protein 28 [Source:NCBI gene (formerly Entrezgene);Acc:817870]
AT2G33150	PKT3	PKT3	NCBI gene (formerly Entrezgene)	peroxisomal 3-ketoacyl-CoA thiolase 3 [Source:NCBI gene (formerly Entrezgene);Acc:817876]
AT2G33580	NA	LYK5	NCBI gene (formerly Entrezgene)	Protein kinase superfamily protein [Source:NCBI gene (formerly Entrezgene);Acc:817923]
AT2G33730	NA	AT2G33730	NCBI gene (formerly Entrezgene)	P-loop containing nucleoside triphosphate hydrolases superfamily protein [Source:NCBI gene (formerly Entrezgene);Acc:817938]
AT2G34500	CYP710A1	CYP710A1	NCBI gene (formerly Entrezgene)	cytochrome P450, family 710, subfamily A, polypeptide 1 [Source:NCBI gene (formerly Entrezgene);Acc:818013]
AT2G34660	MRP2	ABCC2	NCBI gene (formerly Entrezgene)	multidrug resistance-associated protein 2 [Source:NCBI gene (formerly Entrezgene);Acc:818031]
AT2G35510	SRO1	SRO1	NCBI gene (formerly Entrezgene)	similar to RCD one 1 [Source:NCBI gene (formerly Entrezgene);Acc:818116]
AT2G35550	BPC7	BPC7	NCBI gene (formerly Entrezgene)	basic pentacysteine 7 [Source:NCBI gene (formerly Entrezgene);Acc:818120]
AT2G35930	PUB23	PUB23	NCBI gene (formerly Entrezgene)	plant U-box 23 [Source:NCBI gene (formerly Entrezgene);Acc:818166]
AT2G35940	BLH1	BLH1	NCBI gene (formerly Entrezgene)	BEL1-like homeodomain 1 [Source:NCBI gene (formerly Entrezgene);Acc:818167]
AT2G36220	NA	AT2G36220	NCBI gene (formerly Entrezgene)	NA
AT2G36580	NA	AT2G36580	NCBI gene (formerly Entrezgene)	Pyruvate kinase family protein [Source:NCBI gene (formerly Entrezgene);Acc:818231]
AT2G36770	NA	AT2G36770	NCBI gene (formerly Entrezgene)	UDP-Glycosyltransferase superfamily protein [Source:NCBI gene (formerly Entrezgene);Acc:818249]
AT2G36780	NA	AT2G36780	NCBI gene (formerly Entrezgene)	UDP-Glycosyltransferase superfamily protein [Source:NCBI gene (formerly Entrezgene);Acc:818250]
AT2G37410	ATTIM17-2	TIM17-2	NCBI gene (formerly Entrezgene)	translocase inner membrane subunit 17-2 [Source:NCBI gene (formerly Entrezgene);Acc:818317]
AT2G38340	DREB19	DREB19	NCBI gene (formerly Entrezgene)	Integrase-type DNA-binding superfamily protein [Source:NCBI gene (formerly Entrezgene);Acc:818414]
AT2G38470	WRKY33	WRKY33	NCBI gene (formerly Entrezgene)	WRKY DNA-binding protein 33 [Source:NCBI gene (formerly Entrezgene);Acc:818429]
AT2G38790	NA	AT2G38790	NCBI gene (formerly Entrezgene)	NA
AT2G38800	NA	NA	NA	NA
AT2G39050	NA	EULS3	NCBI gene (formerly Entrezgene)	hydroxyproline-rich glycoprotein family protein [Source:NCBI gene (formerly Entrezgene);Acc:818491]
AT2G39260	NA	AT2G39260	NCBI gene (formerly Entrezgene)	regulator of nonsense transcripts UPF2 [Source:NCBI gene (formerly Entrezgene);Acc:818511]
AT2G39400	NA	AT2G39400	NCBI gene (formerly Entrezgene)	alpha/beta-Hydrolases superfamily protein [Source:NCBI gene (formerly Entrezgene);Acc:818525]
AT2G39480	PGP6	ABCB6	NCBI gene (formerly Entrezgene)	P-glycoprotein 6 [Source:NCBI gene (formerly Entrezgene);Acc:818533]
AT2G39710	NA	AT2G39710	NCBI gene (formerly Entrezgene)	Eukaryotic aspartyl protease family protein [Source:NCBI gene (formerly Entrezgene);Acc:818555]
AT2G39980	NA	AT2G39980	NCBI gene (formerly Entrezgene)	HXXXD-type acyl-transferase family protein [Source:NCBI gene (formerly Entrezgene);Acc:818586]
AT2G40000	HSPRO2	HSPRO2	NCBI gene (formerly Entrezgene)	ortholog of sugar beet HS1 PRO-1 2 [Source:NCBI gene (formerly Entrezgene);Acc:818588]
AT2G40270	NA	AT2G40270	NCBI gene (formerly Entrezgene)	Protein kinase family protein [Source:NCBI gene (formerly Entrezgene);Acc:818619]
AT2G40950	BZIP17	BZIP17	NCBI gene (formerly Entrezgene)	Basic-leucine zipper (bZIP) transcription factor family protein [Source:NCBI gene (formerly Entrezgene);Acc:818694]
AT2G41100	TCH3	TCH3	NCBI gene (formerly Entrezgene)	Calcium-binding EF hand family protein [Source:NCBI gene (formerly Entrezgene);Acc:818709]
AT2G41210	PIP5K5	PIP5K5	NCBI gene (formerly Entrezgene)	phosphatidylinositol- 4-phosphate 5-kinase 5 [Source:NCBI gene (formerly Entrezgene);Acc:818720]
AT2G41380	NA	AT2G41380	NCBI gene (formerly Entrezgene)	S-adenosyl-L-methionine-dependent methyltransferases superfamily protein [Source:NCBI gene (formerly Entrezgene);Acc:818736]
AT2G41410	NA	AT2G41410	NCBI gene (formerly Entrezgene)	Calcium-binding EF-hand family protein [Source:NCBI gene (formerly Entrezgene);Acc:818739]
AT2G41640	NA	AT2G41640	NCBI gene (formerly Entrezgene)	Glycosyltransferase family 61 protein [Source:NCBI gene (formerly Entrezgene);Acc:818762]
AT2G41835	NA	AT2G41835	NCBI gene (formerly Entrezgene)	zinc finger (C2H2 type, AN1-like) family protein [Source:NCBI gene (formerly Entrezgene);Acc:818783]
AT2G42350	NA	AT2G42350	NCBI gene (formerly Entrezgene)	RING/U-box superfamily protein [Source:NCBI gene (formerly Entrezgene);Acc:818836]
AT2G42760	NA	AT2G42760	NCBI gene (formerly Entrezgene)	DUF1685 family protein [Source:NCBI gene (formerly Entrezgene);Acc:818876]
AT2G43060	IBH1	IBH1	NCBI gene (formerly Entrezgene)	ILI1 binding bHLH 1 [Source:NCBI gene (formerly Entrezgene);Acc:818908]
AT2G43120	NA	AT2G43120	NCBI gene (formerly Entrezgene)	RmlC-like cupins superfamily protein [Source:NCBI gene (formerly Entrezgene);Acc:818914]
AT2G44080	ARL	ARL	NCBI gene (formerly Entrezgene)	ARGOS-like protein [Source:NCBI gene (formerly Entrezgene);Acc:819014]
AT2G44280	NA	AT2G44280	NCBI gene (formerly Entrezgene)	Major facilitator superfamily protein [Source:NCBI gene (formerly Entrezgene);Acc:819036]
AT2G44480	BGLU17	BGLU17	NCBI gene (formerly Entrezgene)	beta glucosidase 17 [Source:NCBI gene (formerly Entrezgene);Acc:819055]
AT2G44500	NA	AT2G44500	NCBI gene (formerly Entrezgene)	O-fucosyltransferase family protein [Source:NCBI gene (formerly Entrezgene);Acc:819057]
AT2G44520	COX10	COX10	NCBI gene (formerly Entrezgene)	cytochrome c oxidase 10 [Source:NCBI gene (formerly Entrezgene);Acc:819059]
AT2G44578	NA	AT2G44578	NCBI gene (formerly Entrezgene)	RING/U-box superfamily protein [Source:NCBI gene (formerly Entrezgene);Acc:5007961]
AT2G44750	TPK2	TPK2	NCBI gene (formerly Entrezgene)	thiamin pyrophosphokinase 2 [Source:NCBI gene (formerly Entrezgene);Acc:819084]
AT2G44990	CCD7	CCD7	NCBI gene (formerly Entrezgene)	carotenoid cleavage dioxygenase 7 [Source:NCBI gene (formerly Entrezgene);Acc:819107]
AT2G45170	ATATG8E	ATG8E	NCBI gene (formerly Entrezgene)	AUTOPHAGY 8E [Source:NCBI gene (formerly Entrezgene);Acc:819125]
AT2G45510	CYP704A2	CYP704A2	NCBI gene (formerly Entrezgene)	cytochrome P450, family 704, subfamily A, polypeptide 2 [Source:NCBI gene (formerly Entrezgene);Acc:819159]
AT2G46430	ATCNGC3	CNGC3	NCBI gene (formerly Entrezgene)	cyclic nucleotide gated channel 3 [Source:NCBI gene (formerly Entrezgene);Acc:819251]
AT2G46500	PI4K GAMMA 4	PI4K GAMMA 4	NCBI gene (formerly Entrezgene)	phosphoinositide 4-kinase gamma 4 [Source:NCBI gene (formerly Entrezgene);Acc:819260]
AT2G46620	NA	AT2G46620	NCBI gene (formerly Entrezgene)	P-loop containing nucleoside triphosphate hydrolases superfamily protein [Source:NCBI gene (formerly Entrezgene);Acc:819274]
AT2G46680	ATHB-7	HB-7	NCBI gene (formerly Entrezgene)	homeobox 7 [Source:NCBI gene (formerly Entrezgene);Acc:819280]
AT2G47190	ATMYB2	MYB2	NCBI gene (formerly Entrezgene)	myb domain protein 2 [Source:NCBI gene (formerly Entrezgene);Acc:819332]
AT2G47730	ATGSTF8	GSTF8	NCBI gene (formerly Entrezgene)	glutathione S-transferase phi 8 [Source:NCBI gene (formerly Entrezgene);Acc:819386]
AT3G01290	NA	HIR2	NCBI gene (formerly Entrezgene)	SPFH/Band 7/PHB domain-containing membrane-associated protein family [Source:NCBI gene (formerly Entrezgene);Acc:821309]
AT3G01830	NA	AT3G01830	NCBI gene (formerly Entrezgene)	Calcium-binding EF-hand family protein [Source:NCBI gene (formerly Entrezgene);Acc:820033]
AT3G02170	LNG2	LNG2	NCBI gene (formerly Entrezgene)	longifolia2 [Source:NCBI gene (formerly Entrezgene);Acc:821279]
AT3G02800	NA	PFA-DSP3	NCBI gene (formerly Entrezgene)	Tyrosine phosphatase family protein [Source:NCBI gene (formerly Entrezgene);Acc:821239]
AT3G02840	NA	AT3G02840	NCBI gene (formerly Entrezgene)	ARM repeat superfamily protein [Source:NCBI gene (formerly Entrezgene);Acc:821225]
AT3G02875	ILR1	ILR1	NCBI gene (formerly Entrezgene)	Peptidase M20/M25/M40 family protein [Source:NCBI gene (formerly Entrezgene);Acc:821199]
AT3G03000	NA	AT3G03000	NCBI gene (formerly Entrezgene)	EF hand calcium-binding protein family [Source:NCBI gene (formerly Entrezgene);Acc:821161]
AT3G03470	CYP89A9	CYP89A9	NCBI gene (formerly Entrezgene)	cytochrome P450, family 87, subfamily A, polypeptide 9 [Source:NCBI gene (formerly Entrezgene);Acc:821250]
AT3G04060	anac046	NAC046	NCBI gene (formerly Entrezgene)	NAC domain containing protein 46 [Source:NCBI gene (formerly Entrezgene);Acc:819561]
AT3G04220	NA	AT3G04220	NCBI gene (formerly Entrezgene)	Disease resistance protein (TIR-NBS-LRR class) family [Source:NCBI gene (formerly Entrezgene);Acc:819577]
AT3G04240	SEC	SEC	NCBI gene (formerly Entrezgene)	Tetratricopeptide repeat (TPR)-like superfamily protein [Source:NCBI gene (formerly Entrezgene);Acc:819579]
AT3G04420	anac048	NAC048	NCBI gene (formerly Entrezgene)	NAC domain containing protein 48 [Source:NCBI gene (formerly Entrezgene);Acc:819597]
AT3G04640	NA	AT3G04640	NCBI gene (formerly Entrezgene)	glycine-rich protein [Source:NCBI gene (formerly Entrezgene);Acc:819622]
AT3G04930	NA	AT3G04930	NCBI gene (formerly Entrezgene)	DNA-binding storekeeper protein-related transcriptional regulator [Source:NCBI gene (formerly Entrezgene);Acc:819653]
AT3G05200	ATL6	ATL6	NCBI gene (formerly Entrezgene)	RING/U-box superfamily protein [Source:NCBI gene (formerly Entrezgene);Acc:819684]
AT3G05320	NA	AT3G05320	NCBI gene (formerly Entrezgene)	O-fucosyltransferase family protein [Source:NCBI gene (formerly Entrezgene);Acc:819696]
AT3G05360	AtRLP30	RLP30	NCBI gene (formerly Entrezgene)	receptor like protein 30 [Source:NCBI gene (formerly Entrezgene);Acc:819700]
AT3G05380	ALY2	ALY2	NCBI gene (formerly Entrezgene)	ALWAYS EARLY 2 [Source:NCBI gene (formerly Entrezgene);Acc:819702]
AT3G05937	NA	AT3G05937	NCBI gene (formerly Entrezgene)	NA
AT3G06080	TBL10	TBL10	NCBI gene (formerly Entrezgene)	trichome birefringence-like protein (DUF828) [Source:NCBI gene (formerly Entrezgene);Acc:819781]
AT3G06170	NA	AT3G06170	NCBI gene (formerly Entrezgene)	Serinc-domain containing serine and sphingolipid biosynthesis protein [Source:NCBI gene (formerly Entrezgene);Acc:819791]
AT3G06860	MFP2	MFP2	NCBI gene (formerly Entrezgene)	multifunctional protein 2 [Source:NCBI gene (formerly Entrezgene);Acc:819870]
AT3G07195	NA	AT3G07195	NCBI gene (formerly Entrezgene)	RPM1-interacting protein 4 (RIN4) family protein [Source:NCBI gene (formerly Entrezgene);Acc:819907]
AT3G07600	NA	AT3G07600	NCBI gene (formerly Entrezgene)	Heavy metal transport/detoxification superfamily protein [Source:NCBI gene (formerly Entrezgene);Acc:819951]
AT3G07780	OBE1	OBE1	NCBI gene (formerly Entrezgene)	potyvirus VPg interacting protein (DUF1423) [Source:NCBI gene (formerly Entrezgene);Acc:819969]
AT3G08690	UBC11	UBC11	NCBI gene (formerly Entrezgene)	ubiquitin-conjugating enzyme 11 [Source:NCBI gene (formerly Entrezgene);Acc:820016]
AT3G08760	ATSIK	ATSIK	NCBI gene (formerly Entrezgene)	Protein kinase superfamily protein [Source:NCBI gene (formerly Entrezgene);Acc:820023]
AT3G08860	PYD4	PYD4	NCBI gene (formerly Entrezgene)	PYRIMIDINE 4 [Source:NCBI gene (formerly Entrezgene);Acc:820034]
AT3G09020	NA	AT3G09020	NCBI gene (formerly Entrezgene)	alpha 1,4-glycosyltransferase family protein [Source:NCBI gene (formerly Entrezgene);Acc:820054]
AT3G09440	NA	AT3G09440	NCBI gene (formerly Entrezgene)	Heat shock protein 70 (Hsp 70) family protein [Source:NCBI gene (formerly Entrezgene);Acc:820102]
AT3G09830	NA	AT3G09830	NCBI gene (formerly Entrezgene)	Protein kinase superfamily protein [Source:NCBI gene (formerly Entrezgene);Acc:820141]
AT3G10320	NA	AT3G10320	NCBI gene (formerly Entrezgene)	Glycosyltransferase family 61 protein [Source:NCBI gene (formerly Entrezgene);Acc:820194]
AT3G10480	ANAC050	NAC050	NCBI gene (formerly Entrezgene)	NAC domain containing protein 50 [Source:NCBI gene (formerly Entrezgene);Acc:820212]
AT3G10490	ANAC051;ANAC052	NAC052	NCBI gene (formerly Entrezgene)	NAC domain containing protein 52 [Source:NCBI gene (formerly Entrezgene);Acc:820213]
AT3G10500	anac053	NAC053	NCBI gene (formerly Entrezgene)	NAC domain containing protein 53 [Source:NCBI gene (formerly Entrezgene);Acc:820214]
AT3G10640	VPS60.1	VPS60.1	NCBI gene (formerly Entrezgene)	SNF7 family protein [Source:NCBI gene (formerly Entrezgene);Acc:820233]
AT3G10930	NA	AT3G10930	NCBI gene (formerly Entrezgene)	NA
AT3G11080	AtRLP35	RLP35	NCBI gene (formerly Entrezgene)	receptor like protein 35 [Source:NCBI gene (formerly Entrezgene);Acc:820279]
AT3G11150	NA	AT3G11150	NCBI gene (formerly Entrezgene)	2-oxoglutarate (2OG) and Fe(II)-dependent oxygenase superfamily protein [Source:NCBI gene (formerly Entrezgene);Acc:820285]
AT3G11410	ATPP2CA	PP2CA	NCBI gene (formerly Entrezgene)	protein phosphatase 2CA [Source:NCBI gene (formerly Entrezgene);Acc:820314]
AT3G11640	NA	AT3G11640	NCBI gene (formerly Entrezgene)	transmembrane protein [Source:NCBI gene (formerly Entrezgene);Acc:820336]
AT3G11820	SYP121	SYP121	NCBI gene (formerly Entrezgene)	syntaxin of plants 121 [Source:NCBI gene (formerly Entrezgene);Acc:820355]
AT3G11840	PUB24	PUB24	NCBI gene (formerly Entrezgene)	E3 ubiquitin-protein ligase PUB24-like protein [Source:NCBI gene (formerly Entrezgene);Acc:820357]
AT3G11850	NA	AT3G11850	NCBI gene (formerly Entrezgene)	myosin-binding protein (Protein of unknown function, DUF593) [Source:NCBI gene (formerly Entrezgene);Acc:820358]
AT3G12360	ITN1	ITN1	NCBI gene (formerly Entrezgene)	Ankyrin repeat family protein [Source:NCBI gene (formerly Entrezgene);Acc:820414]
AT3G12580	HSP70	HSP70	NCBI gene (formerly Entrezgene)	heat shock protein 70 [Source:NCBI gene (formerly Entrezgene);Acc:820438]
AT3G12740	ALIS1	ALIS1	NCBI gene (formerly Entrezgene)	ALA-interacting subunit 1 [Source:NCBI gene (formerly Entrezgene);Acc:820456]
AT3G13062	NA	AT3G13062	NCBI gene (formerly Entrezgene)	Polyketide cyclase/dehydrase and lipid transport superfamily protein [Source:NCBI gene (formerly Entrezgene);Acc:820493]
AT3G13229	NA	AT3G13229	NCBI gene (formerly Entrezgene)	kinesin-like protein (DUF868) [Source:NCBI gene (formerly Entrezgene);Acc:820520]
AT3G13310	NA	AT3G13310	NCBI gene (formerly Entrezgene)	Chaperone DnaJ-domain superfamily protein [Source:NCBI gene (formerly Entrezgene);Acc:820531]
AT3G13430	NA	AT3G13430	NCBI gene (formerly Entrezgene)	RING/U-box superfamily protein [Source:NCBI gene (formerly Entrezgene);Acc:820543]
AT3G13720	PRA1.F3	PRA8	NCBI gene (formerly Entrezgene)	PRA1 (Prenylated rab acceptor) family protein [Source:NCBI gene (formerly Entrezgene);Acc:820581]
AT3G14050	RSH2	RSH2	NCBI gene (formerly Entrezgene)	RELA/SPOT homolog 2 [Source:NCBI gene (formerly Entrezgene);Acc:820619]
AT3G14070	CAX9	CAX9	NCBI gene (formerly Entrezgene)	cation exchanger 9 [Source:NCBI gene (formerly Entrezgene);Acc:820622]
AT3G14090	ATEXO70D3	EXO70D3	NCBI gene (formerly Entrezgene)	exocyst subunit exo70 family protein D3 [Source:NCBI gene (formerly Entrezgene);Acc:820625]
AT3G14230	RAP2.2	RAP2.2	NCBI gene (formerly Entrezgene)	related to AP2 2 [Source:NCBI gene (formerly Entrezgene);Acc:820643]
AT3G14280	NA	AT3G14280	NCBI gene (formerly Entrezgene)	LL-diaminopimelate aminotransferase [Source:NCBI gene (formerly Entrezgene);Acc:820648]
AT3G14440	NCED3	NCED3	NCBI gene (formerly Entrezgene)	nine-cis-epoxycarotenoid dioxygenase 3 [Source:NCBI gene (formerly Entrezgene);Acc:820667]
AT3G14620	CYP72A8	CYP72A8	NCBI gene (formerly Entrezgene)	cytochrome P450, family 72, subfamily A, polypeptide 8 [Source:NCBI gene (formerly Entrezgene);Acc:820690]
AT3G14700	NA	AT3G14700	NCBI gene (formerly Entrezgene)	SART-1 family [Source:NCBI gene (formerly Entrezgene);Acc:820698]
AT3G15353	MT3	MT3	NCBI gene (formerly Entrezgene)	metallothionein 3 [Source:NCBI gene (formerly Entrezgene);Acc:820771]
AT3G15500	ATNAC3	NAC3	NCBI gene (formerly Entrezgene)	NAC domain containing protein 3 [Source:NCBI gene (formerly Entrezgene);Acc:820789]
AT3G15518	NA	AT3G15518	NCBI gene (formerly Entrezgene)	NA
AT3G15820	ROD1	ROD1	NCBI gene (formerly Entrezgene)	phosphatidic acid phosphatase-related / PAP2-like protein [Source:NCBI gene (formerly Entrezgene);Acc:820825]
AT3G15880	WSIP2	WSIP2	NCBI gene (formerly Entrezgene)	WUS-interacting protein 2 [Source:NCBI gene (formerly Entrezgene);Acc:820831]
AT3G16510	NA	AT3G16510	NCBI gene (formerly Entrezgene)	Calcium-dependent lipid-binding (CaLB domain) family protein [Source:NCBI gene (formerly Entrezgene);Acc:820899]
AT3G16720	ATL2	ATL2	NCBI gene (formerly Entrezgene)	TOXICOS EN LEVADURA 2 [Source:NCBI gene (formerly Entrezgene);Acc:820924]
AT3G16860	COBL8	COBL8	NCBI gene (formerly Entrezgene)	COBRA-like protein 8 [Source:NCBI gene (formerly Entrezgene);Acc:820941]
AT3G16910	AAE7	AAE7	NCBI gene (formerly Entrezgene)	acyl-activating enzyme 7 [Source:NCBI gene (formerly Entrezgene);Acc:820946]
AT3G16990	NA	AT3G16990	NCBI gene (formerly Entrezgene)	heme oxygenase-like, multi-helical [Source:NCBI gene (formerly Entrezgene);Acc:820955]
AT3G17700	CNBT1	CNBT1	NCBI gene (formerly Entrezgene)	cyclic nucleotide-binding transporter 1 [Source:NCBI gene (formerly Entrezgene);Acc:821037]
AT3G17790	ATACP5	PAP17	NCBI gene (formerly Entrezgene)	purple acid phosphatase 17 [Source:NCBI gene (formerly Entrezgene);Acc:821047]
AT3G17800	NA	AT3G17800	NCBI gene (formerly Entrezgene)	alanine-tRNA ligase, putative (DUF760) [Source:NCBI gene (formerly Entrezgene);Acc:821048]
AT3G17810	PYD1	PYD1	NCBI gene (formerly Entrezgene)	pyrimidine 1 [Source:NCBI gene (formerly Entrezgene);Acc:821049]
AT3G18560	NA	AT3G18560	NCBI gene (formerly Entrezgene)	NA
AT3G19010	NA	AT3G19010	NCBI gene (formerly Entrezgene)	2-oxoglutarate (2OG) and Fe(II)-dependent oxygenase superfamily protein [Source:NCBI gene (formerly Entrezgene);Acc:821434]
AT3G19030	NA	AT3G19030	NCBI gene (formerly Entrezgene)	transcription initiation factor TFIID subunit 1b-like protein [Source:NCBI gene (formerly Entrezgene);Acc:821436]
AT3G19290	ABF4	ABF4	NCBI gene (formerly Entrezgene)	ABRE binding factor 4 [Source:NCBI gene (formerly Entrezgene);Acc:821463]
AT3G19580	AZF2	ZF2	NCBI gene (formerly Entrezgene)	zinc-finger protein 2 [Source:NCBI gene (formerly Entrezgene);Acc:821495]
AT3G19660	NA	AT3G19660	NCBI gene (formerly Entrezgene)	NA
AT3G20250	APUM5	PUM5	NCBI gene (formerly Entrezgene)	pumilio 5 [Source:NCBI gene (formerly Entrezgene);Acc:821569]
AT3G20410	CPK9	CPK9	NCBI gene (formerly Entrezgene)	calmodulin-domain protein kinase 9 [Source:NCBI gene (formerly Entrezgene);Acc:821586]
AT3G21780	UGT71B6	UGT71B6	NCBI gene (formerly Entrezgene)	UDP-glucosyl transferase 71B6 [Source:NCBI gene (formerly Entrezgene);Acc:821732]
AT3G22330	PMH2	PMH2	NCBI gene (formerly Entrezgene)	putative mitochondrial RNA helicase 2 [Source:NCBI gene (formerly Entrezgene);Acc:821802]
AT3G22460	OASA2	OASA2	NCBI gene (formerly Entrezgene)	O-acetylserine (thiol) lyase (OAS-TL) [Source:NCBI gene (formerly Entrezgene);Acc:821817]
AT3G22930	CML11	CML11	NCBI gene (formerly Entrezgene)	calmodulin-like 11 [Source:NCBI gene (formerly Entrezgene);Acc:821865]
AT3G23030	IAA2	IAA2	NCBI gene (formerly Entrezgene)	indole-3-acetic acid inducible 2 [Source:NCBI gene (formerly Entrezgene);Acc:821877]
AT3G24929	NA	AT3G24929	NCBI gene (formerly Entrezgene)	NA
AT3G25070	RIN4	RIN4	NCBI gene (formerly Entrezgene)	RPM1 interacting protein 4 [Source:NCBI gene (formerly Entrezgene);Acc:822098]
AT3G25510	NA	AT3G25510	NCBI gene (formerly Entrezgene)	disease resistance protein (TIR-NBS-LRR class) family protein [Source:NCBI gene (formerly Entrezgene);Acc:822137]
AT3G25600	NA	AT3G25600	NCBI gene (formerly Entrezgene)	Calcium-binding EF-hand family protein [Source:NCBI gene (formerly Entrezgene);Acc:822147]
AT3G25610	NA	AT3G25610	NCBI gene (formerly Entrezgene)	ATPase E1-E2 type family protein / haloacid dehalogenase-like hydrolase family protein [Source:NCBI gene (formerly Entrezgene);Acc:822148]
AT3G26200	CYP71B22	CYP71B22	NCBI gene (formerly Entrezgene)	cytochrome P450, family 71, subfamily B, polypeptide 22 [Source:NCBI gene (formerly Entrezgene);Acc:822221]
AT3G26220	CYP71B3	CYP71B3	NCBI gene (formerly Entrezgene)	cytochrome P450, family 71, subfamily B, polypeptide 3 [Source:NCBI gene (formerly Entrezgene);Acc:822223]
AT3G26280	CYP71B4	CYP71B4	NCBI gene (formerly Entrezgene)	cytochrome P450, family 71, subfamily B, polypeptide 4 [Source:NCBI gene (formerly Entrezgene);Acc:822231]
AT3G26510	NA	AT3G26510	NCBI gene (formerly Entrezgene)	Octicosapeptide/Phox/Bem1p family protein [Source:NCBI gene (formerly Entrezgene);Acc:822258]
AT3G26590	NA	AT3G26590	NCBI gene (formerly Entrezgene)	MATE efflux family protein [Source:NCBI gene (formerly Entrezgene);Acc:822267]
AT3G26840	NA	PES2	NCBI gene (formerly Entrezgene)	Esterase/lipase/thioesterase family protein [Source:NCBI gene (formerly Entrezgene);Acc:822299]
AT3G26910	NA	AT3G26910	NCBI gene (formerly Entrezgene)	hydroxyproline-rich glycoprotein family protein [Source:NCBI gene (formerly Entrezgene);Acc:822307]
AT3G27260	GTE8	GTE8	NCBI gene (formerly Entrezgene)	global transcription factor group E8 [Source:NCBI gene (formerly Entrezgene);Acc:822345]
AT3G27560	ATN1	ATN1	NCBI gene (formerly Entrezgene)	Protein kinase superfamily protein [Source:NCBI gene (formerly Entrezgene);Acc:822378]
AT3G27820	ATMDAR4	MDAR4	NCBI gene (formerly Entrezgene)	monodehydroascorbate reductase 4 [Source:NCBI gene (formerly Entrezgene);Acc:822402]
AT3G28210	PMZ	PMZ	NCBI gene (formerly Entrezgene)	zinc finger (AN1-like) family protein [Source:NCBI gene (formerly Entrezgene);Acc:822447]
AT3G28340	GATL10	GATL10	NCBI gene (formerly Entrezgene)	galacturonosyltransferase-like 10 [Source:NCBI gene (formerly Entrezgene);Acc:822462]
AT3G28450	NA	AT3G28450	NCBI gene (formerly Entrezgene)	Leucine-rich repeat protein kinase family protein [Source:NCBI gene (formerly Entrezgene);Acc:822474]
AT3G28580	NA	AT3G28580	NCBI gene (formerly Entrezgene)	P-loop containing nucleoside triphosphate hydrolases superfamily protein [Source:NCBI gene (formerly Entrezgene);Acc:822488]
AT3G28950	NA	AT3G28950	NCBI gene (formerly Entrezgene)	AIG2-like (avirulence induced family protein [Source:NCBI gene (formerly Entrezgene);Acc:822532]
AT3G30390	NA	AT3G30390	NCBI gene (formerly Entrezgene)	Transmembrane amino acid transporter family protein [Source:NCBI gene (formerly Entrezgene);Acc:822740]
AT3G44400	NA	AT3G44400	NCBI gene (formerly Entrezgene)	Disease resistance protein (TIR-NBS-LRR class) family [Source:NCBI gene (formerly Entrezgene);Acc:823565]
AT3G44670	NA	AT3G44670	NCBI gene (formerly Entrezgene)	Disease resistance protein (TIR-NBS-LRR class) family [Source:NCBI gene (formerly Entrezgene);Acc:823593]
AT3G45040	NA	AT3G45040	NCBI gene (formerly Entrezgene)	phosphatidate cytidylyltransferase family protein [Source:NCBI gene (formerly Entrezgene);Acc:823639]
AT3G45640	ATMPK3	MPK3	NCBI gene (formerly Entrezgene)	mitogen-activated protein kinase 3 [Source:NCBI gene (formerly Entrezgene);Acc:823706]
AT3G45650	NAXT1	NAXT1	NCBI gene (formerly Entrezgene)	nitrate excretion transporter1 [Source:NCBI gene (formerly Entrezgene);Acc:823707]
AT3G45730	NA	AT3G45730	NCBI gene (formerly Entrezgene)	NA
AT3G46090	ZAT7	ZAT7	NCBI gene (formerly Entrezgene)	C2H2 and C2HC zinc fingers superfamily protein [Source:NCBI gene (formerly Entrezgene);Acc:823752]
AT3G46530	RPP13	RPP13	NCBI gene (formerly Entrezgene)	NB-ARC domain-containing disease resistance protein [Source:NCBI gene (formerly Entrezgene);Acc:823806]
AT3G46730	NA	AT3G46730	NCBI gene (formerly Entrezgene)	NB-ARC domain-containing disease resistance protein [Source:NCBI gene (formerly Entrezgene);Acc:823826]
AT3G46920	NA	AT3G46920	NCBI gene (formerly Entrezgene)	kinase superfamily with octicosapeptide/Phox/Bem1p domain-containing protein [Source:NCBI gene (formerly Entrezgene);Acc:823845]
AT3G46930	NA	AT3G46930	NCBI gene (formerly Entrezgene)	Protein kinase superfamily protein [Source:NCBI gene (formerly Entrezgene);Acc:823846]
AT3G47160	NA	AT3G47160	NCBI gene (formerly Entrezgene)	RING/U-box superfamily protein [Source:NCBI gene (formerly Entrezgene);Acc:823869]
AT3G47550	NA	AT3G47550	NCBI gene (formerly Entrezgene)	RING/FYVE/PHD zinc finger superfamily protein [Source:NCBI gene (formerly Entrezgene);Acc:823909]
AT3G47800	NA	AT3G47800	NCBI gene (formerly Entrezgene)	Galactose mutarotase-like superfamily protein [Source:NCBI gene (formerly Entrezgene);Acc:823934]
AT3G47820	PUB39	PUB39	NCBI gene (formerly Entrezgene)	PLANT U-BOX 39 [Source:NCBI gene (formerly Entrezgene);Acc:823936]
AT3G48020	NA	AT3G48020	NCBI gene (formerly Entrezgene)	NA
AT3G49210	NA	AT3G49210	NCBI gene (formerly Entrezgene)	O-acyltransferase (WSD1-like) family protein [Source:NCBI gene (formerly Entrezgene);Acc:824082]
AT3G49530	ANAC062	NAC062	NCBI gene (formerly Entrezgene)	NAC domain containing protein 62 [Source:NCBI gene (formerly Entrezgene);Acc:824115]
AT3G49790	NA	AT3G49790	NCBI gene (formerly Entrezgene)	Carbohydrate-binding protein [Source:NCBI gene (formerly Entrezgene);Acc:824141]
AT3G49800	NA	AT3G49800	NCBI gene (formerly Entrezgene)	BSD domain-containing protein [Source:NCBI gene (formerly Entrezgene);Acc:824142]
AT3G50470	HR3	HR3	NCBI gene (formerly Entrezgene)	homolog of RPW8 3 [Source:NCBI gene (formerly Entrezgene);Acc:824211]
AT3G50910	NA	AT3G50910	NCBI gene (formerly Entrezgene)	netrin receptor DCC [Source:NCBI gene (formerly Entrezgene);Acc:824255]
AT3G50930	BCS1	BCS1	NCBI gene (formerly Entrezgene)	cytochrome BC1 synthesi [Source:NCBI gene (formerly Entrezgene);Acc:824257]
AT3G50950	ZAR1	ZAR1	NCBI gene (formerly Entrezgene)	HOPZ-ACTIVATED RESISTANCE 1 [Source:NCBI gene (formerly Entrezgene);Acc:824259]
AT3G51070	NA	AT3G51070	NCBI gene (formerly Entrezgene)	S-adenosyl-L-methionine-dependent methyltransferases superfamily protein [Source:NCBI gene (formerly Entrezgene);Acc:824271]
AT3G51730	NA	AT3G51730	NCBI gene (formerly Entrezgene)	saposin B domain-containing protein [Source:NCBI gene (formerly Entrezgene);Acc:824336]
AT3G51960	ATBZIP24	BZIP24	NCBI gene (formerly Entrezgene)	basic leucine zipper 24 [Source:NCBI gene (formerly Entrezgene);Acc:824359]
AT3G52400	SYP122	SYP122	NCBI gene (formerly Entrezgene)	syntaxin of plants 122 [Source:NCBI gene (formerly Entrezgene);Acc:824405]
AT3G52710	NA	AT3G52710	NCBI gene (formerly Entrezgene)	NA
AT3G52800	NA	AT3G52800	NCBI gene (formerly Entrezgene)	A20/AN1-like zinc finger family protein [Source:NCBI gene (formerly Entrezgene);Acc:824446]
AT3G53310	NA	AT3G53310	NCBI gene (formerly Entrezgene)	AP2/B3-like transcriptional factor family protein [Source:NCBI gene (formerly Entrezgene);Acc:824499]
AT3G54100	NA	AT3G54100	NCBI gene (formerly Entrezgene)	O-fucosyltransferase family protein [Source:NCBI gene (formerly Entrezgene);Acc:824577]
AT3G54150	NA	AT3G54150	NCBI gene (formerly Entrezgene)	S-adenosyl-L-methionine-dependent methyltransferases superfamily protein [Source:NCBI gene (formerly Entrezgene);Acc:824582]
AT3G54640	TSA1	TSA1	NCBI gene (formerly Entrezgene)	tryptophan synthase alpha chain [Source:NCBI gene (formerly Entrezgene);Acc:824629]
AT3G55270	MKP1	NA	NA	NA
AT3G55320	PGP20	ABCB20	NCBI gene (formerly Entrezgene)	P-glycoprotein 20 [Source:NCBI gene (formerly Entrezgene);Acc:824698]
AT3G55470	NA	AT3G55470	NCBI gene (formerly Entrezgene)	Calcium-dependent lipid-binding (CaLB domain) family protein [Source:NCBI gene (formerly Entrezgene);Acc:824713]
AT3G55740	PROT2	PROT2	NCBI gene (formerly Entrezgene)	proline transporter 2 [Source:NCBI gene (formerly Entrezgene);Acc:824740]
AT3G55880	SUE4	SUE4	NCBI gene (formerly Entrezgene)	Alpha/beta hydrolase related protein [Source:NCBI gene (formerly Entrezgene);Acc:824754]
AT3G55890	NA	AT3G55890	NCBI gene (formerly Entrezgene)	Yippee family putative zinc-binding protein [Source:NCBI gene (formerly Entrezgene);Acc:824755]
AT3G55910	NA	AT3G55910	NCBI gene (formerly Entrezgene)	ADP-ribosylation factor GTPase-activating protein [Source:NCBI gene (formerly Entrezgene);Acc:824757]
AT3G55950	CCR3	CCR3	NCBI gene (formerly Entrezgene)	CRINKLY4 related 3 [Source:NCBI gene (formerly Entrezgene);Acc:824761]
AT3G55960	NA	AT3G55960	NCBI gene (formerly Entrezgene)	Haloacid dehalogenase-like hydrolase (HAD) superfamily protein [Source:NCBI gene (formerly Entrezgene);Acc:824762]
AT3G56030	NA	AT3G56030	NCBI gene (formerly Entrezgene)	Tetratricopeptide repeat (TPR)-like superfamily protein [Source:NCBI gene (formerly Entrezgene);Acc:824769]
AT3G56410	NA	AT3G56410	NCBI gene (formerly Entrezgene)	NA
AT3G57530	CPK32	CPK32	NCBI gene (formerly Entrezgene)	calcium-dependent protein kinase 32 [Source:NCBI gene (formerly Entrezgene);Acc:824920]
AT3G57540	NA	AT3G57540	NCBI gene (formerly Entrezgene)	Remorin family protein [Source:NCBI gene (formerly Entrezgene);Acc:824921]
AT3G57680	NA	AT3G57680	NCBI gene (formerly Entrezgene)	Peptidase S41 family protein [Source:NCBI gene (formerly Entrezgene);Acc:824937]
AT3G57750	NA	AT3G57750	NCBI gene (formerly Entrezgene)	Protein kinase superfamily protein [Source:NCBI gene (formerly Entrezgene);Acc:824944]
AT3G58600	NA	AT3G58600	NCBI gene (formerly Entrezgene)	Adaptin ear-binding coat-associated protein 1 NECAP-1 [Source:NCBI gene (formerly Entrezgene);Acc:825029]
AT3G59090	NA	Cand3	NCBI gene (formerly Entrezgene)	tobamovirus multiplication protein [Source:NCBI gene (formerly Entrezgene);Acc:825078]
AT3G59660	NA	AT3G59660	NCBI gene (formerly Entrezgene)	C2 domain-containing protein / GRAM domain-containing protein [Source:NCBI gene (formerly Entrezgene);Acc:825135]
AT3G59700	ATHLECRK	HLECRK	NCBI gene (formerly Entrezgene)	lectin-receptor kinase [Source:NCBI gene (formerly Entrezgene);Acc:825139]
AT3G59940	NA	AT3G59940	NCBI gene (formerly Entrezgene)	Galactose oxidase/kelch repeat superfamily protein [Source:NCBI gene (formerly Entrezgene);Acc:825164]
AT3G60110	NA	AT3G60110	NCBI gene (formerly Entrezgene)	DNA-binding bromodomain-containing protein [Source:NCBI gene (formerly Entrezgene);Acc:825181]
AT3G60140	DIN2	DIN2	NCBI gene (formerly Entrezgene)	Glycosyl hydrolase superfamily protein [Source:NCBI gene (formerly Entrezgene);Acc:825184]
AT3G60180	NA	AT3G60180	NCBI gene (formerly Entrezgene)	P-loop containing nucleoside triphosphate hydrolases superfamily protein [Source:NCBI gene (formerly Entrezgene);Acc:825188]
AT3G60966	NA	AT3G60966	NCBI gene (formerly Entrezgene)	RING/U-box superfamily protein [Source:NCBI gene (formerly Entrezgene);Acc:3769752]
AT3G61060	AtPP2-A13	PP2-A13	NCBI gene (formerly Entrezgene)	phloem protein 2-A13 [Source:NCBI gene (formerly Entrezgene);Acc:825278]
AT3G61180	NA	AT3G61180	NCBI gene (formerly Entrezgene)	RING/U-box superfamily protein [Source:NCBI gene (formerly Entrezgene);Acc:825290]
AT3G61190	BAP1	BAP1	NCBI gene (formerly Entrezgene)	BON association protein 1 [Source:NCBI gene (formerly Entrezgene);Acc:825291]
AT3G62260	NA	AT3G62260	NCBI gene (formerly Entrezgene)	Protein phosphatase 2C family protein [Source:NCBI gene (formerly Entrezgene);Acc:825399]
AT3G62420	ATBZIP53	BZIP53	NCBI gene (formerly Entrezgene)	basic region/leucine zipper motif 53 [Source:NCBI gene (formerly Entrezgene);Acc:825415]
AT3G63050	NA	AT3G63050	NCBI gene (formerly Entrezgene)	NA
AT3G63310	BIL4	BIL4	NCBI gene (formerly Entrezgene)	Bax inhibitor-1 family protein [Source:NCBI gene (formerly Entrezgene);Acc:825506]
AT4G00355	NA	ATI2	NCBI gene (formerly Entrezgene)	mesoderm induction early response protein [Source:NCBI gene (formerly Entrezgene);Acc:827659]
AT4G01000	NA	AT4G01000	NCBI gene (formerly Entrezgene)	Ubiquitin-like superfamily protein [Source:NCBI gene (formerly Entrezgene);Acc:826414]
AT4G01010	ATCNGC13	CNGC13	NCBI gene (formerly Entrezgene)	cyclic nucleotide-gated channel 13 [Source:NCBI gene (formerly Entrezgene);Acc:826427]
AT4G01290	NA	AT4G01290	NCBI gene (formerly Entrezgene)	chorismate synthase [Source:NCBI gene (formerly Entrezgene);Acc:828103]
AT4G01480	AtPPa5	PPa5	NCBI gene (formerly Entrezgene)	pyrophosphorylase 5 [Source:NCBI gene (formerly Entrezgene);Acc:827962]
AT4G01610	NA	AT4G01610	NCBI gene (formerly Entrezgene)	Cysteine proteinases superfamily protein [Source:NCBI gene (formerly Entrezgene);Acc:826792]
AT4G01840	KCO5	KCO5	NCBI gene (formerly Entrezgene)	Ca2+ activated outward rectifying K+ channel 5 [Source:NCBI gene (formerly Entrezgene);Acc:828091]
AT4G02280	SUS3	SUS3	NCBI gene (formerly Entrezgene)	sucrose synthase 3 [Source:NCBI gene (formerly Entrezgene);Acc:828081]
AT4G02350	SEC15B	SEC15B	NCBI gene (formerly Entrezgene)	exocyst complex component sec15B [Source:NCBI gene (formerly Entrezgene);Acc:828060]
AT4G02380	SAG21	SAG21	NCBI gene (formerly Entrezgene)	senescence-associated 21 [Source:NCBI gene (formerly Entrezgene);Acc:828053]
AT4G02410	NA	AT4G02410	NCBI gene (formerly Entrezgene)	Concanavalin A-like lectin protein kinase family protein [Source:NCBI gene (formerly Entrezgene);Acc:828032]
AT4G03260	NA	AT4G03260	NCBI gene (formerly Entrezgene)	Outer arm dynein light chain 1 protein [Source:NCBI gene (formerly Entrezgene);Acc:828003]
AT4G03320	tic20-IV	Tic20-IV	NCBI gene (formerly Entrezgene)	translocon at the inner envelope membrane of chloroplasts 20-IV [Source:NCBI gene (formerly Entrezgene);Acc:827972]
AT4G04620	ATG8B	ATG8B	NCBI gene (formerly Entrezgene)	Ubiquitin-like superfamily protein [Source:NCBI gene (formerly Entrezgene);Acc:825794]
AT4G04960	NA	AT4G04960	NCBI gene (formerly Entrezgene)	Concanavalin A-like lectin protein kinase family protein [Source:NCBI gene (formerly Entrezgene);Acc:825837]
AT4G05590	NA	AT4G05590	NCBI gene (formerly Entrezgene)	pyruvate carrier-like protein [Source:NCBI gene (formerly Entrezgene);Acc:825927]
AT4G07390	NA	AT4G07390	NCBI gene (formerly Entrezgene)	Mannose-P-dolichol utilization defect 1 protein [Source:NCBI gene (formerly Entrezgene);Acc:826170]
AT4G08500	MEKK1	MEKK1	NCBI gene (formerly Entrezgene)	MAPK/ERK kinase kinase 1 [Source:NCBI gene (formerly Entrezgene);Acc:826409]
AT4G08510	NA	AT4G08510	NCBI gene (formerly Entrezgene)	mediator of RNA polymerase II transcription subunit-like protein [Source:NCBI gene (formerly Entrezgene);Acc:826410]
AT4G08900	NA	ARGAH1	NCBI gene (formerly Entrezgene)	arginase [Source:NCBI gene (formerly Entrezgene);Acc:826468]
AT4G08920	CRY1	CRY1	NCBI gene (formerly Entrezgene)	cryptochrome 1 [Source:NCBI gene (formerly Entrezgene);Acc:826470]
AT4G08950	EXO	EXO	NCBI gene (formerly Entrezgene)	Phosphate-responsive 1 family protein [Source:NCBI gene (formerly Entrezgene);Acc:826473]
AT4G08960	NA	AT4G08960	NCBI gene (formerly Entrezgene)	phosphotyrosyl phosphatase activator (PTPA) family protein [Source:NCBI gene (formerly Entrezgene);Acc:826474]
AT4G09340	NA	AT4G09340	NCBI gene (formerly Entrezgene)	SPla/RYanodine receptor (SPRY) domain-containing protein [Source:NCBI gene (formerly Entrezgene);Acc:826516]
AT4G09750	NA	AT4G09750	NCBI gene (formerly Entrezgene)	NAD(P)-binding Rossmann-fold superfamily protein [Source:NCBI gene (formerly Entrezgene);Acc:826563]
AT4G09830	NA	AT4G09830	NCBI gene (formerly Entrezgene)	nuclear receptor family 2 group C protein [Source:NCBI gene (formerly Entrezgene);Acc:826572]
AT4G10040	CYTC-2	CYTC-2	NCBI gene (formerly Entrezgene)	cytochrome c-2 [Source:NCBI gene (formerly Entrezgene);Acc:826595]
AT4G10380	NIP5;1	NIP5;1	NCBI gene (formerly Entrezgene)	NOD26-like intrinsic protein 5;1 [Source:NCBI gene (formerly Entrezgene);Acc:826630]
AT4G10960	UGE5	UGE5	NCBI gene (formerly Entrezgene)	UDP-D-glucose/UDP-D-galactose 4-epimerase 5 [Source:NCBI gene (formerly Entrezgene);Acc:826696]
AT4G11160	NA	AT4G11160	NCBI gene (formerly Entrezgene)	Translation initiation factor 2, small GTP-binding protein [Source:NCBI gene (formerly Entrezgene);Acc:826717]
AT4G11220	BTI2	BTI2	NCBI gene (formerly Entrezgene)	VIRB2-interacting protein 2 [Source:NCBI gene (formerly Entrezgene);Acc:826724]
AT4G11300	NA	AT4G11300	NCBI gene (formerly Entrezgene)	ROH1, putative (DUF793) [Source:NCBI gene (formerly Entrezgene);Acc:826732]
AT4G11350	NA	AT4G11350	NCBI gene (formerly Entrezgene)	transferring glycosyl group transferase (DUF604) [Source:NCBI gene (formerly Entrezgene);Acc:826737]
AT4G11670	NA	AT4G11670	NCBI gene (formerly Entrezgene)	DNA topoisomerase 4 subunit B (DUF810) [Source:NCBI gene (formerly Entrezgene);Acc:826772]
AT4G11850	PLDGAMMA1	PLDGAMMA1	NCBI gene (formerly Entrezgene)	phospholipase D gamma 1 [Source:NCBI gene (formerly Entrezgene);Acc:826791]
AT4G11860	NA	AT4G11860	NCBI gene (formerly Entrezgene)	FAM63A-like protein (DUF544) [Source:NCBI gene (formerly Entrezgene);Acc:826793]
AT4G11910	NA	AT4G11910	NCBI gene (formerly Entrezgene)	STAY-GREEN-like protein [Source:NCBI gene (formerly Entrezgene);Acc:826798]
AT4G11960	PGRL1B	PGRL1B	NCBI gene (formerly Entrezgene)	PGR5-like B [Source:NCBI gene (formerly Entrezgene);Acc:826803]
AT4G12070	NA	AT4G12070	NCBI gene (formerly Entrezgene)	NA
AT4G12080	AHL1	AHL1	NCBI gene (formerly Entrezgene)	AT-hook motif nuclear-localized protein 1 [Source:NCBI gene (formerly Entrezgene);Acc:826816]
AT4G12290	NA	AT4G12290	NCBI gene (formerly Entrezgene)	Copper amine oxidase family protein [Source:NCBI gene (formerly Entrezgene);Acc:826838]
AT4G12300	CYP706A4	CYP706A4	NCBI gene (formerly Entrezgene)	cytochrome P450, family 706, subfamily A, polypeptide 4 [Source:NCBI gene (formerly Entrezgene);Acc:826839]
AT4G12720	NUDT7;AtNUDT7	NUDT7	NCBI gene (formerly Entrezgene)	MutT/nudix family protein [Source:NCBI gene (formerly Entrezgene);Acc:826884]
AT4G12735	NA	AT4G12735	NCBI gene (formerly Entrezgene)	NA
AT4G13340	NA	LRX3	NCBI gene (formerly Entrezgene)	Leucine-rich repeat (LRR) family protein [Source:NCBI gene (formerly Entrezgene);Acc:826964]
AT4G13395	DVL10	RTFL12	NCBI gene (formerly Entrezgene)	ROTUNDIFOLIA like 12 [Source:NCBI gene (formerly Entrezgene);Acc:5008138]
AT4G13510	AMT1;1	AMT1-1	UniProtKB Gene Name	NA
AT4G13830	J20	J20	NCBI gene (formerly Entrezgene)	DNAJ-like 20 [Source:NCBI gene (formerly Entrezgene);Acc:827017]
AT4G13920	AtRLP50	RLP50	NCBI gene (formerly Entrezgene)	receptor like protein 50 [Source:NCBI gene (formerly Entrezgene);Acc:827026]
AT4G14365	XBAT34	XBAT34	NCBI gene (formerly Entrezgene)	NA
AT4G14370	NA	AT4G14370	NCBI gene (formerly Entrezgene)	Disease resistance protein (TIR-NBS-LRR class) family [Source:NCBI gene (formerly Entrezgene);Acc:827081]
AT4G14710	ATARD2	ATARD2	NCBI gene (formerly Entrezgene)	RmlC-like cupins superfamily protein [Source:NCBI gene (formerly Entrezgene);Acc:827122]
AT4G15130	ATCCT2	NA	NA	NA
AT4G15270	NA	AT4G15270	NCBI gene (formerly Entrezgene)	glucosyltransferase-like protein [Source:NCBI gene (formerly Entrezgene);Acc:827193]
AT4G15490	UGT84A3	UGT84A3	NCBI gene (formerly Entrezgene)	UDP-Glycosyltransferase superfamily protein [Source:NCBI gene (formerly Entrezgene);Acc:827221]
AT4G15530	PPDK	PPDK	NCBI gene (formerly Entrezgene)	pyruvate orthophosphate dikinase [Source:NCBI gene (formerly Entrezgene);Acc:827226]
AT4G15800	RALFL33	RALFL33	NCBI gene (formerly Entrezgene)	ralf-like 33 [Source:NCBI gene (formerly Entrezgene);Acc:827260]
AT4G16190	NA	AT4G16190	NCBI gene (formerly Entrezgene)	Papain family cysteine protease [Source:NCBI gene (formerly Entrezgene);Acc:827311]
AT4G16745	NA	AT4G16745	NCBI gene (formerly Entrezgene)	Exostosin family protein [Source:NCBI gene (formerly Entrezgene);Acc:827378]
AT4G16957	NA	AT4G16957	NCBI gene (formerly Entrezgene)	SUPPRESSOR OF, CONSTITUTIVE protein [Source:NCBI gene (formerly Entrezgene);Acc:28720140]
AT4G16960	NA	AT4G16960	NCBI gene (formerly Entrezgene)	disease resistance protein (TIR-NBS-LRR class) [Source:NCBI gene (formerly Entrezgene);Acc:827404]
AT4G17070	NA	AT4G17070	NCBI gene (formerly Entrezgene)	peptidyl-prolyl cis-trans isomerase [Source:NCBI gene (formerly Entrezgene);Acc:827415]
AT4G17245	NA	AT4G17245	NCBI gene (formerly Entrezgene)	RING/U-box superfamily protein [Source:NCBI gene (formerly Entrezgene);Acc:827437]
AT4G17250	NA	AT4G17250	NCBI gene (formerly Entrezgene)	transmembrane protein [Source:NCBI gene (formerly Entrezgene);Acc:827439]
AT4G17330	ATG2484-1	G2484-1	NCBI gene (formerly Entrezgene)	G2484-1 protein [Source:NCBI gene (formerly Entrezgene);Acc:827445]
AT4G17500	ATERF-1	ERF-1	NCBI gene (formerly Entrezgene)	ethylene responsive element binding factor 1 [Source:NCBI gene (formerly Entrezgene);Acc:827464]
AT4G17670	NA	AT4G17670	NCBI gene (formerly Entrezgene)	senescence-associated family protein (DUF581) [Source:NCBI gene (formerly Entrezgene);Acc:827487]
AT4G17900	NA	AT4G17900	NCBI gene (formerly Entrezgene)	PLATZ transcription factor family protein [Source:NCBI gene (formerly Entrezgene);Acc:827514]
AT4G18010	IP5PII	IP5PII	NCBI gene (formerly Entrezgene)	myo-inositol polyphosphate 5-phosphatase 2 [Source:NCBI gene (formerly Entrezgene);Acc:827526]
AT4G18250	NA	AT4G18250	NCBI gene (formerly Entrezgene)	receptor Serine/Threonine kinase-like protein [Source:NCBI gene (formerly Entrezgene);Acc:827551]
AT4G18580	NA	AT4G18580	NCBI gene (formerly Entrezgene)	NA
AT4G18880	AT-HSFA4A	HSF A4A	NCBI gene (formerly Entrezgene)	heat shock transcription factor A4A [Source:NCBI gene (formerly Entrezgene);Acc:827622]
AT4G18930	NA	AT4G18930	NCBI gene (formerly Entrezgene)	RNA ligase/cyclic nucleotide phosphodiesterase family protein [Source:NCBI gene (formerly Entrezgene);Acc:827628]
AT4G18950	NA	AT4G18950	NCBI gene (formerly Entrezgene)	Integrin-linked protein kinase family [Source:NCBI gene (formerly Entrezgene);Acc:827630]
AT4G19010	NA	AT4G19010	NCBI gene (formerly Entrezgene)	AMP-dependent synthetase and ligase family protein [Source:NCBI gene (formerly Entrezgene);Acc:827639]
AT4G19950	NA	AT4G19950	NCBI gene (formerly Entrezgene)	polyadenylate-binding protein 1-B-binding protein [Source:NCBI gene (formerly Entrezgene);Acc:827739]
AT4G20480	NA	AT4G20480	NCBI gene (formerly Entrezgene)	Putative endonuclease or glycosyl hydrolase [Source:NCBI gene (formerly Entrezgene);Acc:827796]
AT4G20830	NA	AT4G20830	NCBI gene (formerly Entrezgene)	FAD-binding Berberine family protein [Source:NCBI gene (formerly Entrezgene);Acc:827831]
AT4G21120	AAT1	AAT1	NCBI gene (formerly Entrezgene)	amino acid transporter 1 [Source:NCBI gene (formerly Entrezgene);Acc:827860]
AT4G21215	NA	AT4G21215	NCBI gene (formerly Entrezgene)	transmembrane protein [Source:NCBI gene (formerly Entrezgene);Acc:827870]
AT4G21390	B120	B120	NCBI gene (formerly Entrezgene)	S-locus lectin protein kinase family protein [Source:NCBI gene (formerly Entrezgene);Acc:827891]
AT4G21670	CPL1	CPL1	NCBI gene (formerly Entrezgene)	C-terminal domain phosphatase-like 1 [Source:NCBI gene (formerly Entrezgene);Acc:828254]
AT4G21903	NA	AT4G21903	NCBI gene (formerly Entrezgene)	MATE efflux family protein [Source:NCBI gene (formerly Entrezgene);Acc:6241480]
AT4G21980	APG8A	APG8A	NCBI gene (formerly Entrezgene)	Ubiquitin-like superfamily protein [Source:NCBI gene (formerly Entrezgene);Acc:828287]
AT4G22240	NA	AT4G22240	NCBI gene (formerly Entrezgene)	Plastid-lipid associated protein PAP / fibrillin family protein [Source:NCBI gene (formerly Entrezgene);Acc:828319]
AT4G22260	IM	IM	NCBI gene (formerly Entrezgene)	Alternative oxidase family protein [Source:NCBI gene (formerly Entrezgene);Acc:828321]
AT4G22270	MRB1	MRB1	NCBI gene (formerly Entrezgene)	transmembrane protein, putative (DUF3537) [Source:NCBI gene (formerly Entrezgene);Acc:828322]
AT4G22360	NA	AT4G22360	NCBI gene (formerly Entrezgene)	SWIB complex BAF60b domain-containing protein [Source:NCBI gene (formerly Entrezgene);Acc:828331]
AT4G22980	NA	AT4G22980	NCBI gene (formerly Entrezgene)	molybdenum cofactor sulfurase-like protein [Source:NCBI gene (formerly Entrezgene);Acc:828397]
AT4G23010	UTR2	UTR2	NCBI gene (formerly Entrezgene)	UDP-galactose transporter 2 [Source:NCBI gene (formerly Entrezgene);Acc:828400]
AT4G23030	NA	AT4G23030	NCBI gene (formerly Entrezgene)	MATE efflux family protein [Source:NCBI gene (formerly Entrezgene);Acc:828402]
AT4G23220	CRK14	CRK14	NCBI gene (formerly Entrezgene)	cysteine-rich RECEPTOR-like kinase [Source:NCBI gene (formerly Entrezgene);Acc:828421]
AT4G23450	AIRP1	AIRP1	NCBI gene (formerly Entrezgene)	RING/U-box superfamily protein [Source:NCBI gene (formerly Entrezgene);Acc:828444]
AT4G23570	SGT1A	SGT1A	NCBI gene (formerly Entrezgene)	phosphatase-like protein [Source:NCBI gene (formerly Entrezgene);Acc:828457]
AT4G24000	ATCSLG2	CSLG2	NCBI gene (formerly Entrezgene)	cellulose synthase like G2 [Source:NCBI gene (formerly Entrezgene);Acc:828500]
AT4G24450	GWD3	PWD	NCBI gene (formerly Entrezgene)	phosphoglucan, water dikinase [Source:NCBI gene (formerly Entrezgene);Acc:828547]
AT4G24570	DIC2	DIC2	NCBI gene (formerly Entrezgene)	dicarboxylate carrier 2 [Source:NCBI gene (formerly Entrezgene);Acc:828559]
AT4G25390	NA	AT4G25390	NCBI gene (formerly Entrezgene)	Protein kinase superfamily protein [Source:NCBI gene (formerly Entrezgene);Acc:828642]
AT4G25480	DREB1A	DREB1A	NCBI gene (formerly Entrezgene)	dehydration response element B1A [Source:NCBI gene (formerly Entrezgene);Acc:828652]
AT4G25810	XTR6	XTR6	NCBI gene (formerly Entrezgene)	xyloglucan endotransglycosylase 6 [Source:NCBI gene (formerly Entrezgene);Acc:828686]
AT4G25940	NA	AT4G25940	NCBI gene (formerly Entrezgene)	ENTH/ANTH/VHS superfamily protein [Source:NCBI gene (formerly Entrezgene);Acc:828700]
AT4G26090	RPS2	RPS2	NCBI gene (formerly Entrezgene)	NB-ARC domain-containing disease resistance protein [Source:NCBI gene (formerly Entrezgene);Acc:828715]
AT4G26120	NA	AT4G26120	NCBI gene (formerly Entrezgene)	Ankyrin repeat family protein / BTB/POZ domain-containing protein [Source:NCBI gene (formerly Entrezgene);Acc:828718]
AT4G26270	PFK3	PFK3	NCBI gene (formerly Entrezgene)	phosphofructokinase 3 [Source:NCBI gene (formerly Entrezgene);Acc:828733]
AT4G27280	NA	AT4G27280	NCBI gene (formerly Entrezgene)	Calcium-binding EF-hand family protein [Source:NCBI gene (formerly Entrezgene);Acc:828836]
AT4G27470	ATRMA3	RMA3	NCBI gene (formerly Entrezgene)	RING membrane-anchor 3 [Source:NCBI gene (formerly Entrezgene);Acc:828856]
AT4G27480	NA	AT4G27480	NCBI gene (formerly Entrezgene)	Core-2/I-branching beta-1,6-N-acetylglucosaminyltransferase family protein [Source:NCBI gene (formerly Entrezgene);Acc:828857]
AT4G27585	NA	AT4G27585	NCBI gene (formerly Entrezgene)	SPFH/Band 7/PHB domain-containing membrane-associated protein family [Source:NCBI gene (formerly Entrezgene);Acc:828868]
AT4G27652	NA	AT4G27652	NCBI gene (formerly Entrezgene)	NA
AT4G27654	NA	AT4G27654	NCBI gene (formerly Entrezgene)	transmembrane protein [Source:NCBI gene (formerly Entrezgene);Acc:828878]
AT4G28240	NA	NA	NA	NA
AT4G28390	AAC3	AAC3	NCBI gene (formerly Entrezgene)	ADP/ATP carrier 3 [Source:NCBI gene (formerly Entrezgene);Acc:828955]
AT4G28400	NA	AT4G28400	NCBI gene (formerly Entrezgene)	Protein phosphatase 2C family protein [Source:NCBI gene (formerly Entrezgene);Acc:828957]
AT4G28570	NA	AT4G28570	NCBI gene (formerly Entrezgene)	Long-chain fatty alcohol dehydrogenase family protein [Source:NCBI gene (formerly Entrezgene);Acc:828975]
AT4G29190	NA	OZF2	NCBI gene (formerly Entrezgene)	Zinc finger C-x8-C-x5-C-x3-H type family protein [Source:NCBI gene (formerly Entrezgene);Acc:829040]
AT4G29210	GGT4;GGT3	GGT4	NCBI gene (formerly Entrezgene)	gamma-glutamyl transpeptidase 4 [Source:NCBI gene (formerly Entrezgene);Acc:829042]
AT4G29780	NA	AT4G29780	NCBI gene (formerly Entrezgene)	nuclease [Source:NCBI gene (formerly Entrezgene);Acc:829100]
AT4G30100	NA	AT4G30100	NCBI gene (formerly Entrezgene)	P-loop containing nucleoside triphosphate hydrolases superfamily protein [Source:NCBI gene (formerly Entrezgene);Acc:829133]
AT4G30280	ATXTH18	XTH18	NCBI gene (formerly Entrezgene)	xyloglucan endotransglucosylase/hydrolase 18 [Source:NCBI gene (formerly Entrezgene);Acc:829151]
AT4G30490	NA	AT4G30490	NCBI gene (formerly Entrezgene)	AFG1-like ATPase family protein [Source:NCBI gene (formerly Entrezgene);Acc:829172]
AT4G31130	NA	AT4G31130	NCBI gene (formerly Entrezgene)	keratin-associated protein (DUF1218) [Source:NCBI gene (formerly Entrezgene);Acc:829241]
AT4G31500	CYP83B1	CYP83B1	NCBI gene (formerly Entrezgene)	cytochrome P450, family 83, subfamily B, polypeptide 1 [Source:NCBI gene (formerly Entrezgene);Acc:829277]
AT4G32020	NA	AT4G32020	NCBI gene (formerly Entrezgene)	serine/arginine repetitive matrix-like protein [Source:NCBI gene (formerly Entrezgene);Acc:829333]
AT4G32620	NA	AT4G32620	NCBI gene (formerly Entrezgene)	Enhancer of polycomb-like transcription factor protein [Source:NCBI gene (formerly Entrezgene);Acc:829397]
AT4G32760	NA	AT4G32760	NCBI gene (formerly Entrezgene)	ENTH/VHS/GAT family protein [Source:NCBI gene (formerly Entrezgene);Acc:829412]
AT4G32940	GAMMA-VPE	GAMMA-VPE	NCBI gene (formerly Entrezgene)	gamma vacuolar processing enzyme [Source:NCBI gene (formerly Entrezgene);Acc:829431]
AT4G33050	EDA39	EDA39	NCBI gene (formerly Entrezgene)	calmodulin-binding family protein [Source:NCBI gene (formerly Entrezgene);Acc:829442]
AT4G33890	NA	AT4G33890	NCBI gene (formerly Entrezgene)	transcriptional regulator of RNA polII, SAGA, subunit [Source:NCBI gene (formerly Entrezgene);Acc:829532]
AT4G33920	NA	AT4G33920	NCBI gene (formerly Entrezgene)	Protein phosphatase 2C family protein [Source:NCBI gene (formerly Entrezgene);Acc:829536]
AT4G33985	NA	AT4G33985	NCBI gene (formerly Entrezgene)	membrane insertase, putative (DUF1685) [Source:NCBI gene (formerly Entrezgene);Acc:829545]
AT4G34150	NA	AT4G34150	NCBI gene (formerly Entrezgene)	Calcium-dependent lipid-binding (CaLB domain) family protein [Source:NCBI gene (formerly Entrezgene);Acc:829563]
AT4G34390	XLG2	XLG2	NCBI gene (formerly Entrezgene)	extra-large GTP-binding protein 2 [Source:NCBI gene (formerly Entrezgene);Acc:829589]
AT4G34881	NA	AT4G34881	NCBI gene (formerly Entrezgene)	transmembrane protein [Source:NCBI gene (formerly Entrezgene);Acc:6240750]
AT4G35190	NA	LOG5	NCBI gene (formerly Entrezgene)	Putative lysine decarboxylase family protein [Source:NCBI gene (formerly Entrezgene);Acc:829672]
AT4G35260	IDH1	IDH1	NCBI gene (formerly Entrezgene)	isocitrate dehydrogenase 1 [Source:NCBI gene (formerly Entrezgene);Acc:829679]
AT4G35310	CPK5	CPK5	NCBI gene (formerly Entrezgene)	calmodulin-domain protein kinase 5 [Source:NCBI gene (formerly Entrezgene);Acc:829685]
AT4G35600	CONNEXIN 32	CST	NCBI gene (formerly Entrezgene)	Protein kinase superfamily protein [Source:NCBI gene (formerly Entrezgene);Acc:829712]
AT4G36010	NA	AT4G36010	NCBI gene (formerly Entrezgene)	Pathosis-related thaumatin superfamily protein [Source:NCBI gene (formerly Entrezgene);Acc:829757]
AT4G36030	ARO3	ARO3	NCBI gene (formerly Entrezgene)	armadillo repeat only 3 [Source:NCBI gene (formerly Entrezgene);Acc:829759]
AT4G36040	NA	J11	NCBI gene (formerly Entrezgene)	Chaperone DnaJ-domain superfamily protein [Source:NCBI gene (formerly Entrezgene);Acc:829760]
AT4G36220	FAH1	FAH1	NCBI gene (formerly Entrezgene)	ferulic acid 5-hydroxylase 1 [Source:NCBI gene (formerly Entrezgene);Acc:829779]
AT4G36650	ATPBRP	PBRP	NCBI gene (formerly Entrezgene)	plant-specific TFIIB-related protein [Source:NCBI gene (formerly Entrezgene);Acc:829817]
AT4G36790	NA	AT4G36790	NCBI gene (formerly Entrezgene)	Major facilitator superfamily protein [Source:NCBI gene (formerly Entrezgene);Acc:829832]
AT4G37120	SMP2	SMP2	NCBI gene (formerly Entrezgene)	Pre-mRNA splicing Prp18-interacting factor [Source:NCBI gene (formerly Entrezgene);Acc:829866]
AT4G37260	MYB73	MYB73	NCBI gene (formerly Entrezgene)	myb domain protein 73 [Source:NCBI gene (formerly Entrezgene);Acc:829880]
AT4G37370	CYP81D8	CYP81D8	NCBI gene (formerly Entrezgene)	cytochrome P450, family 81, subfamily D, polypeptide 8 [Source:NCBI gene (formerly Entrezgene);Acc:829891]
AT4G37610	BT5	BT5	NCBI gene (formerly Entrezgene)	BTB and TAZ domain protein 5 [Source:NCBI gene (formerly Entrezgene);Acc:829915]
AT4G38440	NA	IYO	NCBI gene (formerly Entrezgene)	RPAP1-like, carboxy-terminal protein [Source:NCBI gene (formerly Entrezgene);Acc:830001]
AT4G38495	NA	AT4G38495	NCBI gene (formerly Entrezgene)	chromatin-remodeling complex subunit [Source:NCBI gene (formerly Entrezgene);Acc:830006]
AT4G38540	NA	AT4G38540	NCBI gene (formerly Entrezgene)	FAD/NAD(P)-binding oxidoreductase family protein [Source:NCBI gene (formerly Entrezgene);Acc:830011]
AT4G38550	NA	AT4G38550	NCBI gene (formerly Entrezgene)	phospholipase-like protein (PEARLI 4) family protein [Source:NCBI gene (formerly Entrezgene);Acc:830012]
AT4G39090	RD19	RD19	NCBI gene (formerly Entrezgene)	Papain family cysteine protease [Source:NCBI gene (formerly Entrezgene);Acc:830064]
AT4G39140	NA	AT4G39140	NCBI gene (formerly Entrezgene)	RING/U-box superfamily protein [Source:NCBI gene (formerly Entrezgene);Acc:830069]
AT4G39270	NA	AT4G39270	NCBI gene (formerly Entrezgene)	Leucine-rich repeat protein kinase family protein [Source:NCBI gene (formerly Entrezgene);Acc:830083]
AT4G39580	NA	AT4G39580	NCBI gene (formerly Entrezgene)	Galactose oxidase/kelch repeat superfamily protein [Source:NCBI gene (formerly Entrezgene);Acc:830112]
AT4G39670	NA	AT4G39670	NCBI gene (formerly Entrezgene)	Glycolipid transfer protein (GLTP) family protein [Source:NCBI gene (formerly Entrezgene);Acc:830121]
AT4G39830	NA	AT4G39830	NCBI gene (formerly Entrezgene)	Cupredoxin superfamily protein [Source:NCBI gene (formerly Entrezgene);Acc:830142]
AT4G39890	AtRABH1c	RABH1c	NCBI gene (formerly Entrezgene)	RAB GTPase homolog H1C [Source:NCBI gene (formerly Entrezgene);Acc:830148]
AT4G40080	NA	AT4G40080	NCBI gene (formerly Entrezgene)	ENTH/ANTH/VHS superfamily protein [Source:NCBI gene (formerly Entrezgene);Acc:830171]
AT5G01100	NA	FRB1	NCBI gene (formerly Entrezgene)	O-fucosyltransferase family protein [Source:NCBI gene (formerly Entrezgene);Acc:831831]
AT5G02040	PRA1.A1	PRA1.A1	NCBI gene (formerly Entrezgene)	prenylated RAB acceptor 1.A1 [Source:NCBI gene (formerly Entrezgene);Acc:831904]
AT5G02100	UNE18	UNE18	NCBI gene (formerly Entrezgene)	Oxysterol-binding family protein [Source:NCBI gene (formerly Entrezgene);Acc:831841]
AT5G02290	NAK	NAK	NCBI gene (formerly Entrezgene)	Protein kinase superfamily protein [Source:NCBI gene (formerly Entrezgene);Acc:831880]
AT5G03204	NA	AT5G03204	NCBI gene (formerly Entrezgene)	NA
AT5G03210	NA	DIP2	NCBI gene (formerly Entrezgene)	E3 ubiquitin-protein ligase [Source:NCBI gene (formerly Entrezgene);Acc:831903]
AT5G03320	NA	AT5G03320	NCBI gene (formerly Entrezgene)	Protein kinase superfamily protein [Source:NCBI gene (formerly Entrezgene);Acc:831876]
AT5G03330	NA	AT5G03330	NCBI gene (formerly Entrezgene)	Cysteine proteinases superfamily protein [Source:NCBI gene (formerly Entrezgene);Acc:831875]
AT5G03355	NA	AT5G03355	NCBI gene (formerly Entrezgene)	cysteine/histidine-rich C1 domain protein [Source:NCBI gene (formerly Entrezgene);Acc:28720553]
AT5G03540	EXO70A1	EXO70A1	NCBI gene (formerly Entrezgene)	exocyst subunit exo70 family protein A1 [Source:NCBI gene (formerly Entrezgene);Acc:831809]
AT5G03630	ATMDAR2	ATMDAR2	NCBI gene (formerly Entrezgene)	Pyridine nucleotide-disulfide oxidoreductase family protein [Source:NCBI gene (formerly Entrezgene);Acc:831774]
AT5G03990	NA	AT5G03990	NCBI gene (formerly Entrezgene)	FK506-binding-like protein [Source:NCBI gene (formerly Entrezgene);Acc:830278]
AT5G04040	SDP1	SDP1	NCBI gene (formerly Entrezgene)	Patatin-like phospholipase family protein [Source:NCBI gene (formerly Entrezgene);Acc:830283]
AT5G04090	NA	AT5G04090	NCBI gene (formerly Entrezgene)	histidine-tRNA ligase [Source:NCBI gene (formerly Entrezgene);Acc:830288]
AT5G04340	C2H2	ZAT6	NCBI gene (formerly Entrezgene)	6 [Source:NCBI gene (formerly Entrezgene);Acc:830313]
AT5G04550	NA	AT5G04550	NCBI gene (formerly Entrezgene)	type-1 restriction enzyme mjaxp r protein (DUF668) [Source:NCBI gene (formerly Entrezgene);Acc:830334]
AT5G04720	ADR1-L2	ADR1-L2	NCBI gene (formerly Entrezgene)	ADR1-like 2 [Source:NCBI gene (formerly Entrezgene);Acc:830350]
AT5G04760	NA	AT5G04760	NCBI gene (formerly Entrezgene)	Duplicated homeodomain-like superfamily protein [Source:NCBI gene (formerly Entrezgene);Acc:830354]
AT5G04930	ALA1	ALA1	NCBI gene (formerly Entrezgene)	aminophospholipid ATPase 1 [Source:NCBI gene (formerly Entrezgene);Acc:830375]
AT5G04980	NA	AT5G04980	NCBI gene (formerly Entrezgene)	DNAse I-like superfamily protein [Source:NCBI gene (formerly Entrezgene);Acc:830380]
AT5G05110	NA	AT5G05110	NCBI gene (formerly Entrezgene)	Cystatin/monellin family protein [Source:NCBI gene (formerly Entrezgene);Acc:830393]
AT5G05190	NA	AT5G05190	NCBI gene (formerly Entrezgene)	NA
AT5G05300	NA	AT5G05300	NCBI gene (formerly Entrezgene)	NA
AT5G05410	DREB2A	DREB2A	NCBI gene (formerly Entrezgene)	DRE-binding protein 2A [Source:NCBI gene (formerly Entrezgene);Acc:830424]
AT5G05440	PYL5	PYL5	NCBI gene (formerly Entrezgene)	Polyketide cyclase/dehydrase and lipid transport superfamily protein [Source:NCBI gene (formerly Entrezgene);Acc:830427]
AT5G05930	GC1	GC1	NCBI gene (formerly Entrezgene)	guanylyl cyclase 1 [Source:NCBI gene (formerly Entrezgene);Acc:830478]
AT5G06230	TBL9	TBL9	NCBI gene (formerly Entrezgene)	TRICHOME BIREFRINGENCE-LIKE 9 [Source:NCBI gene (formerly Entrezgene);Acc:830510]
AT5G06320	NHL3	NHL3	NCBI gene (formerly Entrezgene)	NDR1/HIN1-like 3 [Source:NCBI gene (formerly Entrezgene);Acc:830520]
AT5G06510	NF-YA10	NF-YA10	NCBI gene (formerly Entrezgene)	nuclear factor Y, subunit A10 [Source:NCBI gene (formerly Entrezgene);Acc:830539]
AT5G06960	OBF5	OBF5	NCBI gene (formerly Entrezgene)	OCS-element binding factor 5 [Source:NCBI gene (formerly Entrezgene);Acc:830587]
AT5G07100	WRKY26	WRKY26	NCBI gene (formerly Entrezgene)	WRKY DNA-binding protein 26 [Source:NCBI gene (formerly Entrezgene);Acc:830601]
AT5G07470	PMSR3	PMSR3	NCBI gene (formerly Entrezgene)	peptidemethionine sulfoxide reductase 3 [Source:NCBI gene (formerly Entrezgene);Acc:830638]
AT5G07920	DGK1	DGK1	NCBI gene (formerly Entrezgene)	diacylglycerol kinase1 [Source:NCBI gene (formerly Entrezgene);Acc:830686]
AT5G08240	NA	AT5G08240	NCBI gene (formerly Entrezgene)	transmembrane protein [Source:NCBI gene (formerly Entrezgene);Acc:830720]
AT5G08790	ATAF2	ATAF2	NCBI gene (formerly Entrezgene)	NAC (No Apical Meristem) domain transcriptional regulator superfamily protein [Source:NCBI gene (formerly Entrezgene);Acc:830779]
AT5G09470	DIC3	DIC3	NCBI gene (formerly Entrezgene)	dicarboxylate carrier 3 [Source:NCBI gene (formerly Entrezgene);Acc:830806]
AT5G10625	NA	AT5G10625	NCBI gene (formerly Entrezgene)	flowering-promoting factor-like protein [Source:NCBI gene (formerly Entrezgene);Acc:2745983]
AT5G10695	NA	AT5G10695	NCBI gene (formerly Entrezgene)	methionyl-tRNA synthetase [Source:NCBI gene (formerly Entrezgene);Acc:830934]
AT5G10750	NA	AT5G10750	NCBI gene (formerly Entrezgene)	enhanced disease resistance-like protein (DUF1336) [Source:NCBI gene (formerly Entrezgene);Acc:830942]
AT5G10780	NA	AT5G10780	NCBI gene (formerly Entrezgene)	ER membrane protein complex subunit-like protein [Source:NCBI gene (formerly Entrezgene);Acc:830945]
AT5G10960	NA	AT5G10960	NCBI gene (formerly Entrezgene)	Polynucleotidyl transferase, ribonuclease H-like superfamily protein [Source:NCBI gene (formerly Entrezgene);Acc:830963]
AT5G11000	NA	AT5G11000	NCBI gene (formerly Entrezgene)	NA
AT5G11310	NA	AT5G11310	NCBI gene (formerly Entrezgene)	Pentatricopeptide repeat (PPR) superfamily protein [Source:NCBI gene (formerly Entrezgene);Acc:831002]
AT5G11670	ATNADP-ME2	NADP-ME2	NCBI gene (formerly Entrezgene)	NADP-malic enzyme 2 [Source:NCBI gene (formerly Entrezgene);Acc:831039]
AT5G11730	NA	AT5G11730	NCBI gene (formerly Entrezgene)	Core-2/I-branching beta-1,6-N-acetylglucosaminyltransferase family protein [Source:NCBI gene (formerly Entrezgene);Acc:831045]
AT5G12880	NA	AT5G12880	NCBI gene (formerly Entrezgene)	proline-rich family protein [Source:NCBI gene (formerly Entrezgene);Acc:831128]
AT5G12890	NA	AT5G12890	NCBI gene (formerly Entrezgene)	UDP-Glycosyltransferase superfamily protein [Source:NCBI gene (formerly Entrezgene);Acc:831129]
AT5G13080	WRKY75	WRKY75	NCBI gene (formerly Entrezgene)	WRKY DNA-binding protein 75 [Source:NCBI gene (formerly Entrezgene);Acc:831147]
AT5G13180	ANAC083	NAC083	NCBI gene (formerly Entrezgene)	NAC domain containing protein 83 [Source:NCBI gene (formerly Entrezgene);Acc:831157]
AT5G13190	NA	GILP	NCBI gene (formerly Entrezgene)	GSH-induced LITAF domain protein [Source:NCBI gene (formerly Entrezgene);Acc:831158]
AT5G13200	NA	AT5G13200	NCBI gene (formerly Entrezgene)	GRAM domain family protein [Source:NCBI gene (formerly Entrezgene);Acc:831159]
AT5G13390	NEF1	NEF1	NCBI gene (formerly Entrezgene)	no exine formation 1 [Source:NCBI gene (formerly Entrezgene);Acc:831180]
AT5G13800	PPH	PPH	NCBI gene (formerly Entrezgene)	pheophytinase [Source:NCBI gene (formerly Entrezgene);Acc:831225]
AT5G13820	TBP1	TBP1	NCBI gene (formerly Entrezgene)	telomeric DNA binding protein 1 [Source:NCBI gene (formerly Entrezgene);Acc:831227]
AT5G14540	NA	AT5G14540	NCBI gene (formerly Entrezgene)	basic salivary proline-rich-like protein (DUF1421) [Source:NCBI gene (formerly Entrezgene);Acc:831305]
AT5G14700	NA	AT5G14700	NCBI gene (formerly Entrezgene)	NAD(P)-binding Rossmann-fold superfamily protein [Source:NCBI gene (formerly Entrezgene);Acc:831322]
AT5G14930	SAG101	SAG101	NCBI gene (formerly Entrezgene)	senescence-associated 101 [Source:NCBI gene (formerly Entrezgene);Acc:831345]
AT5G15190	NA	AT5G15190	NCBI gene (formerly Entrezgene)	NA
AT5G15260	NA	AT5G15260	NCBI gene (formerly Entrezgene)	ribosomal protein L34e superfamily protein [Source:NCBI gene (formerly Entrezgene);Acc:831378]
AT5G15500	NA	AT5G15500	NCBI gene (formerly Entrezgene)	Ankyrin repeat family protein [Source:NCBI gene (formerly Entrezgene);Acc:831403]
AT5G15870	NA	AT5G15870	NCBI gene (formerly Entrezgene)	glycosyl hydrolase family 81 protein [Source:NCBI gene (formerly Entrezgene);Acc:831444]
AT5G16120	NA	AT5G16120	NCBI gene (formerly Entrezgene)	alpha/beta-Hydrolases superfamily protein [Source:NCBI gene (formerly Entrezgene);Acc:831469]
AT5G16370	AAE5	AAE5	NCBI gene (formerly Entrezgene)	acyl activating enzyme 5 [Source:NCBI gene (formerly Entrezgene);Acc:831498]
AT5G17860	CAX7	CAX7	NCBI gene (formerly Entrezgene)	calcium exchanger 7 [Source:NCBI gene (formerly Entrezgene);Acc:831654]
AT5G18065	NA	AT5G18065	NCBI gene (formerly Entrezgene)	target of trans acting-siR480/255 protein [Source:NCBI gene (formerly Entrezgene);Acc:831535]
AT5G18130	NA	AT5G18130	NCBI gene (formerly Entrezgene)	transmembrane protein [Source:NCBI gene (formerly Entrezgene);Acc:831931]
AT5G18270	ANAC087	ANAC087	NCBI gene (formerly Entrezgene)	NAC domain containing protein 87 [Source:NCBI gene (formerly Entrezgene);Acc:831945]
AT5G18310	NA	AT5G18310	NCBI gene (formerly Entrezgene)	ubiquitin hydrolase [Source:NCBI gene (formerly Entrezgene);Acc:831949]
AT5G18470	NA	AT5G18470	NCBI gene (formerly Entrezgene)	Curculin-like (mannose-binding) lectin family protein [Source:NCBI gene (formerly Entrezgene);Acc:831965]
AT5G18490	NA	AT5G18490	NCBI gene (formerly Entrezgene)	vacuolar sorting-associated protein (DUF946) [Source:NCBI gene (formerly Entrezgene);Acc:831967]
AT5G19240	NA	AT5G19240	NCBI gene (formerly Entrezgene)	Glycoprotein membrane GPI-anchored [Source:NCBI gene (formerly Entrezgene);Acc:832044]
AT5G19470	atnudt24;NUDT24	NUDT24	NCBI gene (formerly Entrezgene)	nudix hydrolase homolog 24 [Source:NCBI gene (formerly Entrezgene);Acc:832067]
AT5G19900	NA	AT5G19900	NCBI gene (formerly Entrezgene)	PRLI-interacting factor [Source:NCBI gene (formerly Entrezgene);Acc:832112]
AT5G21940	NA	AT5G21940	NCBI gene (formerly Entrezgene)	hybrid signal transduction histidine kinase M-like protein [Source:NCBI gene (formerly Entrezgene);Acc:832254]
AT5G22060	ATJ2	J2	NCBI gene (formerly Entrezgene)	DNAJ homologue 2 [Source:NCBI gene (formerly Entrezgene);Acc:832267]
AT5G22270	NA	AT5G22270	NCBI gene (formerly Entrezgene)	NA
AT5G22300	NIT4	NIT4	NCBI gene (formerly Entrezgene)	nitrilase 4 [Source:NCBI gene (formerly Entrezgene);Acc:832290]
AT5G22350	ELM1	ELM1	NCBI gene (formerly Entrezgene)	fission ELM1-like protein (DUF1022) [Source:NCBI gene (formerly Entrezgene);Acc:832295]
AT5G22380	anac090	NAC090	NCBI gene (formerly Entrezgene)	NAC domain containing protein 90 [Source:NCBI gene (formerly Entrezgene);Acc:832299]
AT5G22450	NA	AT5G22450	NCBI gene (formerly Entrezgene)	spectrin beta chain, brain [Source:NCBI gene (formerly Entrezgene);Acc:832306]
AT5G22520	NA	AT5G22520	NCBI gene (formerly Entrezgene)	NA
AT5G22540	NA	AT5G22540	NCBI gene (formerly Entrezgene)	transmembrane protein, putative (DUF247) [Source:NCBI gene (formerly Entrezgene);Acc:832315]
AT5G23850	NA	AT5G23850	NCBI gene (formerly Entrezgene)	O-glucosyltransferase rumi-like protein (DUF821) [Source:NCBI gene (formerly Entrezgene);Acc:832450]
AT5G24080	NA	AT5G24080	NCBI gene (formerly Entrezgene)	Protein kinase superfamily protein [Source:NCBI gene (formerly Entrezgene);Acc:832473]
AT5G24090	ATCHIA	CHIA	NCBI gene (formerly Entrezgene)	chitinase A [Source:NCBI gene (formerly Entrezgene);Acc:832474]
AT5G24210	NA	AT5G24210	NCBI gene (formerly Entrezgene)	alpha/beta-Hydrolases superfamily protein [Source:NCBI gene (formerly Entrezgene);Acc:832488]
AT5G24870	NA	AT5G24870	NCBI gene (formerly Entrezgene)	RING/U-box superfamily protein [Source:NCBI gene (formerly Entrezgene);Acc:832556]
AT5G25250	NA	FLOT1	NCBI gene (formerly Entrezgene)	SPFH/Band 7/PHB domain-containing membrane-associated protein family [Source:NCBI gene (formerly Entrezgene);Acc:832596]
AT5G25280	NA	AT5G25280	NCBI gene (formerly Entrezgene)	serine-rich protein-like protein [Source:NCBI gene (formerly Entrezgene);Acc:832600]
AT5G25350	EBF2	EBF2	NCBI gene (formerly Entrezgene)	EIN3-binding F box protein 2 [Source:NCBI gene (formerly Entrezgene);Acc:832607]
AT5G25770	NA	AT5G25770	NCBI gene (formerly Entrezgene)	alpha/beta-Hydrolases superfamily protein [Source:NCBI gene (formerly Entrezgene);Acc:832646]
AT5G25820	NA	AT5G25820	NCBI gene (formerly Entrezgene)	Exostosin family protein [Source:NCBI gene (formerly Entrezgene);Acc:832651]
AT5G25930	NA	AT5G25930	NCBI gene (formerly Entrezgene)	kinase family with leucine-rich repeat domain-containing protein [Source:NCBI gene (formerly Entrezgene);Acc:832662]
AT5G26751	ATSK11	SK 11	NCBI gene (formerly Entrezgene)	shaggy-related kinase 11 [Source:NCBI gene (formerly Entrezgene);Acc:832733]
AT5G26920	CBP60G	CBP60G	NCBI gene (formerly Entrezgene)	Cam-binding protein 60-like G [Source:NCBI gene (formerly Entrezgene);Acc:832750]
AT5G27420	CNI1	CNI1	NCBI gene (formerly Entrezgene)	carbon/nitrogen insensitive 1 [Source:NCBI gene (formerly Entrezgene);Acc:832801]
AT5G27600	LACS7	LACS7	NCBI gene (formerly Entrezgene)	long-chain acyl-CoA synthetase 7 [Source:NCBI gene (formerly Entrezgene);Acc:832820]
AT5G27930	NA	AT5G27930	NCBI gene (formerly Entrezgene)	Protein phosphatase 2C family protein [Source:NCBI gene (formerly Entrezgene);Acc:832860]
AT5G28770	BZO2H3	BZO2H3	NCBI gene (formerly Entrezgene)	bZIP transcription factor family protein [Source:NCBI gene (formerly Entrezgene);Acc:832990]
AT5G33290	XGD1	XGD1	NCBI gene (formerly Entrezgene)	xylogalacturonan deficient 1 [Source:NCBI gene (formerly Entrezgene);Acc:833302]
AT5G35370	NA	AT5G35370	NCBI gene (formerly Entrezgene)	S-locus lectin protein kinase family protein [Source:NCBI gene (formerly Entrezgene);Acc:833498]
AT5G35735	NA	AT5G35735	NCBI gene (formerly Entrezgene)	Auxin-responsive family protein [Source:NCBI gene (formerly Entrezgene);Acc:833550]
AT5G37600	ATGSR1	GSR 1	NCBI gene (formerly Entrezgene)	NA
AT5G38240	NA	AT5G38240	NCBI gene (formerly Entrezgene)	Protein kinase family protein [Source:NCBI gene (formerly Entrezgene);Acc:833806]
AT5G39030	NA	AT5G39030	NCBI gene (formerly Entrezgene)	Protein kinase superfamily protein [Source:NCBI gene (formerly Entrezgene);Acc:833895]
AT5G39520	NA	AT5G39520	NCBI gene (formerly Entrezgene)	NA
AT5G39610	ATNAC2	NAC6	NCBI gene (formerly Entrezgene)	NAC domain containing protein 6 [Source:NCBI gene (formerly Entrezgene);Acc:833957]
AT5G39660	CDF2	CDF2	NCBI gene (formerly Entrezgene)	cycling DOF factor 2 [Source:NCBI gene (formerly Entrezgene);Acc:833962]
AT5G39785	NA	AT5G39785	NCBI gene (formerly Entrezgene)	NA
AT5G40170	AtRLP54	RLP54	NCBI gene (formerly Entrezgene)	receptor like protein 54 [Source:NCBI gene (formerly Entrezgene);Acc:834015]
AT5G40240	NA	UMAMIT40	NCBI gene (formerly Entrezgene)	nodulin MtN21 /EamA-like transporter family protein [Source:NCBI gene (formerly Entrezgene);Acc:834022]
AT5G41410	BEL1	BEL1	NCBI gene (formerly Entrezgene)	POX (plant homeobox) family protein [Source:NCBI gene (formerly Entrezgene);Acc:834143]
AT5G41740	NA	AT5G41740	NCBI gene (formerly Entrezgene)	Disease resistance protein (TIR-NBS-LRR class) family [Source:NCBI gene (formerly Entrezgene);Acc:834177]
AT5G41750	NA	AT5G41750	NCBI gene (formerly Entrezgene)	Disease resistance protein (TIR-NBS-LRR class) family [Source:NCBI gene (formerly Entrezgene);Acc:834178]
AT5G42050	NA	AT5G42050	NCBI gene (formerly Entrezgene)	DCD (Development and Cell Death) domain protein [Source:NCBI gene (formerly Entrezgene);Acc:834210]
AT5G42380	CML39	CML37	NCBI gene (formerly Entrezgene)	calmodulin like 37 [Source:NCBI gene (formerly Entrezgene);Acc:834244]
AT5G42825	NA	AT5G42825	NCBI gene (formerly Entrezgene)	NA
AT5G43190	NA	AT5G43190	NCBI gene (formerly Entrezgene)	Galactose oxidase/kelch repeat superfamily protein [Source:NCBI gene (formerly Entrezgene);Acc:834337]
AT5G43450	NA	AT5G43450	NCBI gene (formerly Entrezgene)	2-oxoglutarate (2OG) and Fe(II)-dependent oxygenase superfamily protein [Source:NCBI gene (formerly Entrezgene);Acc:834365]
AT5G43650	BHLH92	BHLH92	NCBI gene (formerly Entrezgene)	basic helix-loop-helix (bHLH) DNA-binding superfamily protein [Source:NCBI gene (formerly Entrezgene);Acc:834385]
AT5G43670	NA	AT5G43670	NCBI gene (formerly Entrezgene)	Sec23/Sec24 protein transport family protein [Source:NCBI gene (formerly Entrezgene);Acc:834387]
AT5G43780	APS4	APS4	NCBI gene (formerly Entrezgene)	Pseudouridine synthase/archaeosine transglycosylase-like family protein [Source:NCBI gene (formerly Entrezgene);Acc:834400]
AT5G44060	NA	AT5G44060	NCBI gene (formerly Entrezgene)	embryo sac development arrest protein [Source:NCBI gene (formerly Entrezgene);Acc:834429]
AT5G44980	NA	AT5G44980	NCBI gene (formerly Entrezgene)	F-box/RNI-like/FBD-like domains-containing protein [Source:NCBI gene (formerly Entrezgene);Acc:834529]
AT5G45110	NPR3	NPR3	NCBI gene (formerly Entrezgene)	NPR1-like protein 3 [Source:NCBI gene (formerly Entrezgene);Acc:834545]
AT5G45260	RRS1	RRS1	NCBI gene (formerly Entrezgene)	Disease resistance protein (TIR-NBS-LRR class) [Source:NCBI gene (formerly Entrezgene);Acc:834562]
AT5G45380	ATDUR3	DUR3	NCBI gene (formerly Entrezgene)	urea-proton symporter DEGRADATION OF UREA 3 (DUR3) [Source:NCBI gene (formerly Entrezgene);Acc:834574]
AT5G45990	NA	AT5G45990	NCBI gene (formerly Entrezgene)	crooked neck protein, putative / cell cycle protein [Source:NCBI gene (formerly Entrezgene);Acc:834639]
AT5G46080	NA	AT5G46080	NCBI gene (formerly Entrezgene)	Protein kinase superfamily protein [Source:NCBI gene (formerly Entrezgene);Acc:834649]
AT5G46180	DELTA-OAT	DELTA-OAT	NCBI gene (formerly Entrezgene)	ornithine-delta-aminotransferase [Source:NCBI gene (formerly Entrezgene);Acc:834660]
AT5G46295	NA	AT5G46295	NCBI gene (formerly Entrezgene)	transmembrane protein [Source:NCBI gene (formerly Entrezgene);Acc:834672]
AT5G46410	SSP4	SSP4	NCBI gene (formerly Entrezgene)	SCP1-like small phosphatase 4 [Source:NCBI gene (formerly Entrezgene);Acc:834684]
AT5G46710	NA	AT5G46710	NCBI gene (formerly Entrezgene)	PLATZ transcription factor family protein [Source:NCBI gene (formerly Entrezgene);Acc:834714]
AT5G46760	NA	MYC3	NCBI gene (formerly Entrezgene)	Basic helix-loop-helix (bHLH) DNA-binding family protein [Source:NCBI gene (formerly Entrezgene);Acc:834719]
AT5G46780	NA	AT5G46780	NCBI gene (formerly Entrezgene)	VQ motif-containing protein [Source:NCBI gene (formerly Entrezgene);Acc:834721]
AT5G47070	NA	AT5G47070	NCBI gene (formerly Entrezgene)	Protein kinase superfamily protein [Source:NCBI gene (formerly Entrezgene);Acc:834753]
AT5G47220	ATERF2	ERF2	NCBI gene (formerly Entrezgene)	ethylene responsive element binding factor 2 [Source:NCBI gene (formerly Entrezgene);Acc:834768]
AT5G47850	CCR4	CCR4	NCBI gene (formerly Entrezgene)	CRINKLY4 related 4 [Source:NCBI gene (formerly Entrezgene);Acc:834836]
AT5G47860	NA	AT5G47860	NCBI gene (formerly Entrezgene)	Gut esterase (DUF1350) [Source:NCBI gene (formerly Entrezgene);Acc:834837]
AT5G47880	ERF1-1	ERF1-1	NCBI gene (formerly Entrezgene)	eukaryotic release factor 1-1 [Source:NCBI gene (formerly Entrezgene);Acc:834839]
AT5G47910	RBOHD	RBOHD	NCBI gene (formerly Entrezgene)	respiratory burst oxidase homologue D [Source:NCBI gene (formerly Entrezgene);Acc:834842]
AT5G48380	BIR1	BIR1	NCBI gene (formerly Entrezgene)	BAK1-interacting receptor-like kinase 1 [Source:NCBI gene (formerly Entrezgene);Acc:834892]
AT5G48400	ATGLR1.2	ATGLR1.2	NCBI gene (formerly Entrezgene)	Glutamate receptor family protein [Source:NCBI gene (formerly Entrezgene);Acc:834895]
AT5G48410	ATGLR1.3	GLR1.3	NCBI gene (formerly Entrezgene)	glutamate receptor 1.3 [Source:NCBI gene (formerly Entrezgene);Acc:834896]
AT5G48657	NA	AT5G48657	NCBI gene (formerly Entrezgene)	defense protein-like protein [Source:NCBI gene (formerly Entrezgene);Acc:2746202]
AT5G49530	NA	AT5G49530	NCBI gene (formerly Entrezgene)	SIN-like family protein [Source:NCBI gene (formerly Entrezgene);Acc:835014]
AT5G49630	AAP6	AAP6	NCBI gene (formerly Entrezgene)	amino acid permease 6 [Source:NCBI gene (formerly Entrezgene);Acc:835025]
AT5G50360	NA	AT5G50360	NCBI gene (formerly Entrezgene)	von willebrand factor A domain protein [Source:NCBI gene (formerly Entrezgene);Acc:835103]
AT5G50450	NA	AT5G50450	NCBI gene (formerly Entrezgene)	HCP-like superfamily protein with MYND-type zinc finger [Source:NCBI gene (formerly Entrezgene);Acc:835113]
AT5G51040	NA	SDHAF2	NCBI gene (formerly Entrezgene)	succinate dehydrogenase assembly factor [Source:NCBI gene (formerly Entrezgene);Acc:835177]
AT5G51510	NA	AT5G51510	NCBI gene (formerly Entrezgene)	jagunal-like protein [Source:NCBI gene (formerly Entrezgene);Acc:835225]
AT5G52040	RS41;RSP41	RS41	NCBI gene (formerly Entrezgene)	RNA-binding (RRM/RBD/RNP motifs) family protein [Source:NCBI gene (formerly Entrezgene);Acc:835279]
AT5G52250	RUP1	RUP1	NCBI gene (formerly Entrezgene)	Transducin/WD40 repeat-like superfamily protein [Source:NCBI gene (formerly Entrezgene);Acc:835301]
AT5G52390	NA	AT5G52390	NCBI gene (formerly Entrezgene)	PAR1 protein [Source:NCBI gene (formerly Entrezgene);Acc:835315]
AT5G52450	NA	AT5G52450	NCBI gene (formerly Entrezgene)	MATE efflux family protein [Source:NCBI gene (formerly Entrezgene);Acc:835321]
AT5G52640	HSP81-1	HSP90.1	NCBI gene (formerly Entrezgene)	heat shock-like protein [Source:NCBI gene (formerly Entrezgene);Acc:835341]
AT5G52750	NA	AT5G52750	NCBI gene (formerly Entrezgene)	Heavy metal transport/detoxification superfamily protein [Source:NCBI gene (formerly Entrezgene);Acc:835352]
AT5G53300	UBC10	UBC10	NCBI gene (formerly Entrezgene)	ubiquitin-conjugating enzyme 10 [Source:NCBI gene (formerly Entrezgene);Acc:835411]
AT5G53450	ORG1	ORG1	NCBI gene (formerly Entrezgene)	OBP3-responsive protein 1 [Source:NCBI gene (formerly Entrezgene);Acc:835426]
AT5G53550	YSL3	YSL3	NCBI gene (formerly Entrezgene)	YELLOW STRIPE like 3 [Source:NCBI gene (formerly Entrezgene);Acc:835437]
AT5G53750	NA	AT5G53750	NCBI gene (formerly Entrezgene)	CBS domain-containing protein [Source:NCBI gene (formerly Entrezgene);Acc:835456]
AT5G54470	NA	BBX29	NCBI gene (formerly Entrezgene)	B-box type zinc finger family protein [Source:NCBI gene (formerly Entrezgene);Acc:835535]
AT5G54710	NA	AT5G54710	NCBI gene (formerly Entrezgene)	Ankyrin repeat family protein [Source:NCBI gene (formerly Entrezgene);Acc:835560]
AT5G54840	SGP1	SGP1	NCBI gene (formerly Entrezgene)	Ras-related small GTP-binding family protein [Source:NCBI gene (formerly Entrezgene);Acc:835574]
AT5G54870	NA	AT5G54870	NCBI gene (formerly Entrezgene)	inositol-1,4,5-trisphosphate 5-phosphatase [Source:NCBI gene (formerly Entrezgene);Acc:835578]
AT5G55560	NA	AT5G55560	NCBI gene (formerly Entrezgene)	Protein kinase superfamily protein [Source:NCBI gene (formerly Entrezgene);Acc:835650]
AT5G56180	ATARP8	ARP8	NCBI gene (formerly Entrezgene)	actin-related protein 8 [Source:NCBI gene (formerly Entrezgene);Acc:835717]
AT5G56340	ATCRT1	ATCRT1	NCBI gene (formerly Entrezgene)	RING/U-box superfamily protein [Source:NCBI gene (formerly Entrezgene);Acc:835734]
AT5G56840	NA	AT5G56840	NCBI gene (formerly Entrezgene)	myb-like transcription factor family protein [Source:NCBI gene (formerly Entrezgene);Acc:835786]
AT5G57035	NA	AT5G57035	NCBI gene (formerly Entrezgene)	U-box domain-containing protein kinase family protein [Source:NCBI gene (formerly Entrezgene);Acc:835807]
AT5G57550	XTR3	XTH25	NCBI gene (formerly Entrezgene)	xyloglucan endotransglucosylase/hydrolase 25 [Source:NCBI gene (formerly Entrezgene);Acc:835859]
AT5G57560	TCH4	TCH4	NCBI gene (formerly Entrezgene)	Xyloglucan endotransglucosylase/hydrolase family protein [Source:NCBI gene (formerly Entrezgene);Acc:835860]
AT5G57580	NA	AT5G57580	NCBI gene (formerly Entrezgene)	Calmodulin-binding protein [Source:NCBI gene (formerly Entrezgene);Acc:835862]
AT5G57710	NA	AT5G57710	NCBI gene (formerly Entrezgene)	Double Clp-N motif-containing P-loop nucleoside triphosphate hydrolases superfamily protein [Source:NCBI gene (formerly Entrezgene);Acc:835878]
AT5G57910	NA	AT5G57910	NCBI gene (formerly Entrezgene)	ribosomal RNA small subunit methyltransferase G [Source:NCBI gene (formerly Entrezgene);Acc:835902]
AT5G58120	NA	AT5G58120	NCBI gene (formerly Entrezgene)	Disease resistance protein (TIR-NBS-LRR class) family [Source:NCBI gene (formerly Entrezgene);Acc:835924]
AT5G58210	NA	AT5G58210	NCBI gene (formerly Entrezgene)	hydroxyproline-rich glycoprotein family protein [Source:NCBI gene (formerly Entrezgene);Acc:835933]
AT5G58650	PSY1	PSY1	NCBI gene (formerly Entrezgene)	plant peptide containing sulfated tyrosine 1 [Source:NCBI gene (formerly Entrezgene);Acc:835979]
AT5G58680	NA	AT5G58680	NCBI gene (formerly Entrezgene)	ARM repeat superfamily protein [Source:NCBI gene (formerly Entrezgene);Acc:835982]
AT5G58787	NA	AT5G58787	NCBI gene (formerly Entrezgene)	RING/U-box superfamily protein [Source:NCBI gene (formerly Entrezgene);Acc:835995]
AT5G59220	HAI1	HAI1	NCBI gene (formerly Entrezgene)	PP2C protein (Clade A protein phosphatases type 2C) [Source:NCBI gene (formerly Entrezgene);Acc:836040]
AT5G59530	NA	AT5G59530	NCBI gene (formerly Entrezgene)	2-oxoglutarate (2OG) and Fe(II)-dependent oxygenase superfamily protein [Source:NCBI gene (formerly Entrezgene);Acc:836072]
AT5G59540	NA	AT5G59540	NCBI gene (formerly Entrezgene)	2-oxoglutarate (2OG) and Fe(II)-dependent oxygenase superfamily protein [Source:NCBI gene (formerly Entrezgene);Acc:836073]
AT5G59700	NA	AT5G59700	NCBI gene (formerly Entrezgene)	Protein kinase superfamily protein [Source:NCBI gene (formerly Entrezgene);Acc:836091]
AT5G59780	MYB59	MYB59	NCBI gene (formerly Entrezgene)	myb domain protein 59 [Source:NCBI gene (formerly Entrezgene);Acc:836099]
AT5G59820	RHL41	RHL41	NCBI gene (formerly Entrezgene)	C2H2-type zinc finger family protein [Source:NCBI gene (formerly Entrezgene);Acc:836103]
AT5G60360	SAG2;AALP	ALP	NCBI gene (formerly Entrezgene)	aleurain-like protease [Source:NCBI gene (formerly Entrezgene);Acc:836158]
AT5G60790	ATGCN1	ABCF1	NCBI gene (formerly Entrezgene)	ABC transporter family protein [Source:NCBI gene (formerly Entrezgene);Acc:836200]
AT5G61210	SNAP33	SNAP33	NCBI gene (formerly Entrezgene)	soluble N-ethylmaleimide-sensitive factor adaptor protein 33 [Source:NCBI gene (formerly Entrezgene);Acc:836242]
AT5G61500	ATATG3	ATG3	NCBI gene (formerly Entrezgene)	autophagy 3 (APG3) [Source:NCBI gene (formerly Entrezgene);Acc:836271]
AT5G61530	NA	AT5G61530	NCBI gene (formerly Entrezgene)	small G protein family protein / RhoGAP family protein [Source:NCBI gene (formerly Entrezgene);Acc:836274]
AT5G61560	NA	AT5G61560	NCBI gene (formerly Entrezgene)	U-box domain-containing protein kinase family protein [Source:NCBI gene (formerly Entrezgene);Acc:836277]
AT5G61640	PMSR1	PMSR1	NCBI gene (formerly Entrezgene)	peptidemethionine sulfoxide reductase 1 [Source:NCBI gene (formerly Entrezgene);Acc:836286]
AT5G61820	NA	AT5G61820	NCBI gene (formerly Entrezgene)	stress up-regulated Nod 19 protein [Source:NCBI gene (formerly Entrezgene);Acc:836304]
AT5G62000	ARF2	ARF2	NCBI gene (formerly Entrezgene)	auxin response factor 2 [Source:NCBI gene (formerly Entrezgene);Acc:836321]
AT5G62020	AT-HSFB2A	HSFB2A	NCBI gene (formerly Entrezgene)	heat shock transcription factor B2A [Source:NCBI gene (formerly Entrezgene);Acc:836322]
AT5G62150	NA	AT5G62150	NCBI gene (formerly Entrezgene)	peptidoglycan-binding LysM domain-containing protein [Source:NCBI gene (formerly Entrezgene);Acc:836335]
AT5G62165	AGL42	AGL42	NCBI gene (formerly Entrezgene)	AGAMOUS-like 42 [Source:NCBI gene (formerly Entrezgene);Acc:836337]
AT5G62280	NA	AT5G62280	NCBI gene (formerly Entrezgene)	DUF1442 family protein (DUF1442) [Source:NCBI gene (formerly Entrezgene);Acc:836349]
AT5G62610	NA	AT5G62610	NCBI gene (formerly Entrezgene)	basic helix-loop-helix (bHLH) DNA-binding superfamily protein [Source:NCBI gene (formerly Entrezgene);Acc:836382]
AT5G62620	NA	AT5G62620	NCBI gene (formerly Entrezgene)	Galactosyltransferase family protein [Source:NCBI gene (formerly Entrezgene);Acc:836383]
AT5G62740	HIR1	HIR1	NCBI gene (formerly Entrezgene)	SPFH/Band 7/PHB domain-containing membrane-associated protein family [Source:NCBI gene (formerly Entrezgene);Acc:836395]
AT5G63130	NA	AT5G63130	NCBI gene (formerly Entrezgene)	Octicosapeptide/Phox/Bem1p family protein [Source:NCBI gene (formerly Entrezgene);Acc:836433]
AT5G63760	ARI15	ARI15	NCBI gene (formerly Entrezgene)	RING/U-box superfamily protein [Source:NCBI gene (formerly Entrezgene);Acc:836496]
AT5G64190	NA	AT5G64190	NCBI gene (formerly Entrezgene)	neuronal PAS domain protein [Source:NCBI gene (formerly Entrezgene);Acc:836540]
AT5G64260	EXL2	EXL2	NCBI gene (formerly Entrezgene)	EXORDIUM like 2 [Source:NCBI gene (formerly Entrezgene);Acc:836547]
AT5G64410	ATOPT4	OPT4	NCBI gene (formerly Entrezgene)	oligopeptide transporter 4 [Source:NCBI gene (formerly Entrezgene);Acc:836562]
AT5G64430	NA	AT5G64430	NCBI gene (formerly Entrezgene)	Octicosapeptide/Phox/Bem1p family protein [Source:NCBI gene (formerly Entrezgene);Acc:836564]
AT5G64450	NA	AT5G64450	NCBI gene (formerly Entrezgene)	NYN domain protein [Source:NCBI gene (formerly Entrezgene);Acc:836566]
AT5G65200	PUB38	PUB38	NCBI gene (formerly Entrezgene)	plant U-box 38 [Source:NCBI gene (formerly Entrezgene);Acc:836643]
AT5G65240	NA	AT5G65240	NCBI gene (formerly Entrezgene)	Leucine-rich repeat protein kinase family protein [Source:NCBI gene (formerly Entrezgene);Acc:836649]
AT5G65600	NA	AT5G65600	NCBI gene (formerly Entrezgene)	Concanavalin A-like lectin protein kinase family protein [Source:NCBI gene (formerly Entrezgene);Acc:836686]
AT5G65920	NA	AT5G65920	NCBI gene (formerly Entrezgene)	ARM repeat superfamily protein [Source:NCBI gene (formerly Entrezgene);Acc:836721]
AT5G66070	NA	AT5G66070	NCBI gene (formerly Entrezgene)	RING/U-box superfamily protein [Source:NCBI gene (formerly Entrezgene);Acc:836739]
AT5G66620	DAR6	DAR6	NCBI gene (formerly Entrezgene)	DA1-related protein 6 [Source:NCBI gene (formerly Entrezgene);Acc:836794]
AT5G66650	NA	AT5G66650	NCBI gene (formerly Entrezgene)	calcium uniporter (DUF607) [Source:NCBI gene (formerly Entrezgene);Acc:836797]
AT5G67310	CYP81G1	CYP81G1	NCBI gene (formerly Entrezgene)	cytochrome P450, family 81, subfamily G, polypeptide 1 [Source:NCBI gene (formerly Entrezgene);Acc:836866]
AT5G67480	BT4	BT4	NCBI gene (formerly Entrezgene)	BTB and TAZ domain protein 4 [Source:NCBI gene (formerly Entrezgene);Acc:836884]

## Sheet: 35S.Down&cr.Up name description
gene ID	TAIR gene name	external gene name	external gene name source	gene description
AT1G01620	PIP1C	PIP1C	NCBI gene (formerly Entrezgene)	plasma membrane intrinsic protein 1C [Source:NCBI gene (formerly Entrezgene);Acc:839235]
AT1G01970	NA	AT1G01970	NCBI gene (formerly Entrezgene)	Tetratricopeptide repeat (TPR)-like superfamily protein [Source:NCBI gene (formerly Entrezgene);Acc:839299]
AT1G02640	BXL2	BXL2	NCBI gene (formerly Entrezgene)	beta-xylosidase 2 [Source:NCBI gene (formerly Entrezgene);Acc:837940]
AT1G03600	PSB27	PSB27	NCBI gene (formerly Entrezgene)	photosystem II family protein [Source:NCBI gene (formerly Entrezgene);Acc:839449]
AT1G03630	POR C	POR C	NCBI gene (formerly Entrezgene)	protochlorophyllide oxidoreductase C [Source:NCBI gene (formerly Entrezgene);Acc:839009]
AT1G04250	AXR3	AXR3	NCBI gene (formerly Entrezgene)	AUX/IAA transcriptional regulator family protein [Source:NCBI gene (formerly Entrezgene);Acc:839568]
AT1G04420	NA	AT1G04420	NCBI gene (formerly Entrezgene)	NAD(P)-linked oxidoreductase superfamily protein [Source:NCBI gene (formerly Entrezgene);Acc:839524]
AT1G04680	NA	AT1G04680	NCBI gene (formerly Entrezgene)	Pectin lyase-like superfamily protein [Source:NCBI gene (formerly Entrezgene);Acc:839452]
AT1G04800	NA	AT1G04800	NCBI gene (formerly Entrezgene)	glycine-rich protein [Source:NCBI gene (formerly Entrezgene);Acc:839406]
AT1G04820	TUA4	TUA4	NCBI gene (formerly Entrezgene)	tubulin alpha-4 chain [Source:NCBI gene (formerly Entrezgene);Acc:839405]
AT1G04920	ATSPS3F	SPS3F	NCBI gene (formerly Entrezgene)	sucrose phosphate synthase 3F [Source:NCBI gene (formerly Entrezgene);Acc:839382]
AT1G04940	TIC20	Tic20-I	NCBI gene (formerly Entrezgene)	translocon at the inner envelope membrane of chloroplasts 20 [Source:NCBI gene (formerly Entrezgene);Acc:839374]
AT1G05190	emb2394	emb2394	NCBI gene (formerly Entrezgene)	Ribosomal protein L6 family [Source:NCBI gene (formerly Entrezgene);Acc:839273]
AT1G05210	NA	AT1G05210	NCBI gene (formerly Entrezgene)	Transmembrane protein 97, Putative [Source:NCBI gene (formerly Entrezgene);Acc:839261]
AT1G05560	UGT1	UGT75B1	NCBI gene (formerly Entrezgene)	UDP-glucosyltransferase 75B1 [Source:NCBI gene (formerly Entrezgene);Acc:837058]
AT1G05850	POM1	POM1	NCBI gene (formerly Entrezgene)	Chitinase family protein [Source:NCBI gene (formerly Entrezgene);Acc:837095]
AT1G06190	NA	RHON1	NCBI gene (formerly Entrezgene)	Rho termination factor [Source:NCBI gene (formerly Entrezgene);Acc:837128]
AT1G06360	NA	AT1G06360	NCBI gene (formerly Entrezgene)	Fatty acid desaturase family protein [Source:NCBI gene (formerly Entrezgene);Acc:837147]
AT1G07320	RPL4	RPL4	NCBI gene (formerly Entrezgene)	ribosomal protein L4 [Source:NCBI gene (formerly Entrezgene);Acc:837243]
AT1G07570	APK1A	APK1A	NCBI gene (formerly Entrezgene)	Protein kinase superfamily protein [Source:NCBI gene (formerly Entrezgene);Acc:837271]
AT1G07820	NA	AT1G07820	NCBI gene (formerly Entrezgene)	Histone superfamily protein [Source:NCBI gene (formerly Entrezgene);Acc:837297]
AT1G08280	NA	AT1G08280	NCBI gene (formerly Entrezgene)	Glycosyltransferase family 29 (sialyltransferase) family protein [Source:NCBI gene (formerly Entrezgene);Acc:837348]
AT1G08520	ALB1	ALB1	NCBI gene (formerly Entrezgene)	ALBINA 1 [Source:NCBI gene (formerly Entrezgene);Acc:837374]
AT1G08540	SIGB	SIG2	NCBI gene (formerly Entrezgene)	RNApolymerase sigma subunit 2 [Source:NCBI gene (formerly Entrezgene);Acc:837376]
AT1G09580	NA	AT1G09580	NCBI gene (formerly Entrezgene)	emp24/gp25L/p24 family/GOLD family protein [Source:NCBI gene (formerly Entrezgene);Acc:837485]
AT1G09750	NA	AT1G09750	NCBI gene (formerly Entrezgene)	Eukaryotic aspartyl protease family protein [Source:NCBI gene (formerly Entrezgene);Acc:837504]
AT1G10030	ERG28	ERG28	NCBI gene (formerly Entrezgene)	ergosterol biosynthesis protein [Source:NCBI gene (formerly Entrezgene);Acc:837538]
AT1G10120	NA	AT1G10120	NCBI gene (formerly Entrezgene)	basic helix-loop-helix (bHLH) DNA-binding superfamily protein [Source:NCBI gene (formerly Entrezgene);Acc:837549]
AT1G10657	NA	AT1G10657	NCBI gene (formerly Entrezgene)	transmembrane protein [Source:NCBI gene (formerly Entrezgene);Acc:5007676]
AT1G10670	ACLA-1	ACLA-1	NCBI gene (formerly Entrezgene)	ATP-citrate lyase A-1 [Source:NCBI gene (formerly Entrezgene);Acc:837610]
AT1G10960	ATFD1	FD1	NCBI gene (formerly Entrezgene)	ferredoxin 1 [Source:NCBI gene (formerly Entrezgene);Acc:837639]
AT1G11000	MLO4	MLO4	NCBI gene (formerly Entrezgene)	Seven transmembrane MLO family protein [Source:NCBI gene (formerly Entrezgene);Acc:837643]
AT1G11303	NA	AT1G11303	NCBI gene (formerly Entrezgene)	G-type lectin S-receptor-like Serine/Threonine-kinase [Source:NCBI gene (formerly Entrezgene);Acc:28717232]
AT1G11545	XTH8	XTH8	NCBI gene (formerly Entrezgene)	xyloglucan endotransglucosylase/hydrolase 8 [Source:NCBI gene (formerly Entrezgene);Acc:837698]
AT1G11850	NA	AT1G11850	NCBI gene (formerly Entrezgene)	transmembrane protein [Source:NCBI gene (formerly Entrezgene);Acc:837732]
AT1G11860	NA	AT1G11860	NCBI gene (formerly Entrezgene)	Glycine cleavage T-protein family [Source:NCBI gene (formerly Entrezgene);Acc:837733]
AT1G11870	ATSRS	SRS	NCBI gene (formerly Entrezgene)	Seryl-tRNA synthetase [Source:NCBI gene (formerly Entrezgene);Acc:837734]
AT1G12080	NA	AT1G12080	NCBI gene (formerly Entrezgene)	Vacuolar calcium-binding protein-like protein [Source:NCBI gene (formerly Entrezgene);Acc:837760]
AT1G12310	NA	AT1G12310	NCBI gene (formerly Entrezgene)	Calcium-binding EF-hand family protein [Source:NCBI gene (formerly Entrezgene);Acc:837785]
AT1G12460	NA	AT1G12460	NCBI gene (formerly Entrezgene)	Leucine-rich repeat protein kinase family protein [Source:NCBI gene (formerly Entrezgene);Acc:837803]
AT1G12770	ISE1	EMB1586	NCBI gene (formerly Entrezgene)	P-loop containing nucleoside triphosphate hydrolases superfamily protein [Source:NCBI gene (formerly Entrezgene);Acc:837833]
AT1G12800	NA	AT1G12800	NCBI gene (formerly Entrezgene)	Nucleic acid-binding, OB-fold-like protein [Source:NCBI gene (formerly Entrezgene);Acc:837836]
AT1G12900	GAPA-2	GAPA-2	NCBI gene (formerly Entrezgene)	glyceraldehyde 3-phosphate dehydrogenase A subunit 2 [Source:NCBI gene (formerly Entrezgene);Acc:837848]
AT1G13170	ORP1D	ORP1D	NCBI gene (formerly Entrezgene)	OSBP(oxysterol binding protein)-related protein 1D [Source:NCBI gene (formerly Entrezgene);Acc:837875]
AT1G13250	GATL3	GATL3	NCBI gene (formerly Entrezgene)	galacturonosyltransferase-like 3 [Source:NCBI gene (formerly Entrezgene);Acc:837885]
AT1G13570	NA	AT1G13570	NCBI gene (formerly Entrezgene)	F-box/RNI-like superfamily protein [Source:NCBI gene (formerly Entrezgene);Acc:837918]
AT1G14190	NA	AT1G14190	NCBI gene (formerly Entrezgene)	Glucose-methanol-choline (GMC) oxidoreductase family protein [Source:NCBI gene (formerly Entrezgene);Acc:837979]
AT1G14270	NA	AT1G14270	NCBI gene (formerly Entrezgene)	CAAX amino terminal protease family protein [Source:NCBI gene (formerly Entrezgene);Acc:837988]
AT1G14290	SBH2	SBH2	NCBI gene (formerly Entrezgene)	sphingoid base hydroxylase 2 [Source:NCBI gene (formerly Entrezgene);Acc:837990]
AT1G14345	NA	AT1G14345	NCBI gene (formerly Entrezgene)	NAD(P)-linked oxidoreductase superfamily protein [Source:NCBI gene (formerly Entrezgene);Acc:837996]
AT1G14700	PAP3	PAP3	NCBI gene (formerly Entrezgene)	purple acid phosphatase 3 [Source:NCBI gene (formerly Entrezgene);Acc:838035]
AT1G15180	NA	AT1G15180	NCBI gene (formerly Entrezgene)	MATE efflux family protein [Source:NCBI gene (formerly Entrezgene);Acc:838084]
AT1G15570	CYCA2;3	CYCA2;3	NCBI gene (formerly Entrezgene)	CYCLIN A2;3 [Source:NCBI gene (formerly Entrezgene);Acc:838127]
AT1G15690	AVP1	AVP1	NCBI gene (formerly Entrezgene)	Inorganic H pyrophosphatase family protein [Source:NCBI gene (formerly Entrezgene);Acc:838138]
AT1G15820	LHCB6	LHCB6	NCBI gene (formerly Entrezgene)	light harvesting complex photosystem II subunit 6 [Source:NCBI gene (formerly Entrezgene);Acc:838151]
AT1G15825	NA	AT1G15825	NCBI gene (formerly Entrezgene)	hydroxyproline-rich glycoprotein family protein [Source:NCBI gene (formerly Entrezgene);Acc:838152]
AT1G15830	NA	AT1G15830	NCBI gene (formerly Entrezgene)	NA
AT1G15910	NA	FDM1	NCBI gene (formerly Entrezgene)	XH/XS domain-containing protein [Source:NCBI gene (formerly Entrezgene);Acc:838161]
AT1G15970	NA	AT1G15970	NCBI gene (formerly Entrezgene)	DNA glycosylase superfamily protein [Source:NCBI gene (formerly Entrezgene);Acc:838167]
AT1G16020	NA	AT1G16020	NCBI gene (formerly Entrezgene)	vacuolar fusion protein (DUF1712) [Source:NCBI gene (formerly Entrezgene);Acc:838172]
AT1G16390	ATOCT3	2023-10-03	NCBI gene (formerly Entrezgene)	organic cation/carnitine transporter 3 [Source:NCBI gene (formerly Entrezgene);Acc:838209]
AT1G16920	RAB11	RABA1b	NCBI gene (formerly Entrezgene)	RAB GTPase homolog A1B [Source:NCBI gene (formerly Entrezgene);Acc:838263]
AT1G17650	GLYR2	GLYR2	NCBI gene (formerly Entrezgene)	glyoxylate reductase 2 [Source:NCBI gene (formerly Entrezgene);Acc:838342]
AT1G18440	NA	AT1G18440	NCBI gene (formerly Entrezgene)	Peptidyl-tRNA hydrolase family protein [Source:NCBI gene (formerly Entrezgene);Acc:838424]
AT1G18620	NA	TRM3	NCBI gene (formerly Entrezgene)	LONGIFOLIA protein [Source:NCBI gene (formerly Entrezgene);Acc:838443]
AT1G19950	HVA22H	HVA22H	NCBI gene (formerly Entrezgene)	HVA22-like protein H (ATHVA22H) [Source:NCBI gene (formerly Entrezgene);Acc:838584]
AT1G20810	NA	AT1G20810	NCBI gene (formerly Entrezgene)	FKBP-like peptidyl-prolyl cis-trans isomerase family protein [Source:NCBI gene (formerly Entrezgene);Acc:838672]
AT1G21070	NA	AT1G21070	NCBI gene (formerly Entrezgene)	Nucleotide-sugar transporter family protein [Source:NCBI gene (formerly Entrezgene);Acc:838703]
AT1G21740	NA	AT1G21740	NCBI gene (formerly Entrezgene)	DUF630 family protein, putative (DUF630 and DUF632) [Source:NCBI gene (formerly Entrezgene);Acc:838778]
AT1G21880	LYM1	LYM1	NCBI gene (formerly Entrezgene)	lysm domain GPI-anchored protein 1 [Source:NCBI gene (formerly Entrezgene);Acc:838790]
AT1G22170	NA	AT1G22170	NCBI gene (formerly Entrezgene)	Phosphoglycerate mutase family protein [Source:NCBI gene (formerly Entrezgene);Acc:838822]
AT1G22800	NA	AT1G22800	NCBI gene (formerly Entrezgene)	S-adenosyl-L-methionine-dependent methyltransferases superfamily protein [Source:NCBI gene (formerly Entrezgene);Acc:838886]
AT1G23400	CAF2	CAF2	NCBI gene (formerly Entrezgene)	RNA-binding CRS1 / YhbY (CRM) domain-containing protein [Source:NCBI gene (formerly Entrezgene);Acc:838948]
AT1G23750	NA	AT1G23750	NCBI gene (formerly Entrezgene)	Nucleic acid-binding, OB-fold-like protein [Source:NCBI gene (formerly Entrezgene);Acc:838985]
AT1G23880	NA	AT1G23880	NCBI gene (formerly Entrezgene)	NHL domain-containing protein [Source:NCBI gene (formerly Entrezgene);Acc:838999]
AT1G24610	NA	AT1G24610	NCBI gene (formerly Entrezgene)	Rubisco methyltransferase family protein [Source:NCBI gene (formerly Entrezgene);Acc:839075]
AT1G25290	RBL10	RBL10	NCBI gene (formerly Entrezgene)	RHOMBOID-like protein 10 [Source:NCBI gene (formerly Entrezgene);Acc:839113]
AT1G25450	KCS5	KCS5	NCBI gene (formerly Entrezgene)	3-ketoacyl-CoA synthase 5 [Source:NCBI gene (formerly Entrezgene);Acc:839131]
AT1G26220	NA	AT1G26220	NCBI gene (formerly Entrezgene)	Acyl-CoA N-acyltransferases (NAT) superfamily protein [Source:NCBI gene (formerly Entrezgene);Acc:839163]
AT1G26570	UGD1	UGD1	NCBI gene (formerly Entrezgene)	UDP-glucose dehydrogenase 1 [Source:NCBI gene (formerly Entrezgene);Acc:839197]
AT1G26761	NA	AT1G26761	NCBI gene (formerly Entrezgene)	Arabinanase/levansucrase/invertase [Source:NCBI gene (formerly Entrezgene);Acc:6241260]
AT1G26840	ORC6	ORC6	NCBI gene (formerly Entrezgene)	origin recognition complex protein 6 [Source:NCBI gene (formerly Entrezgene);Acc:839227]
AT1G27090	NA	AT1G27090	NCBI gene (formerly Entrezgene)	glycine-rich protein [Source:NCBI gene (formerly Entrezgene);Acc:839598]
AT1G27210	NA	AT1G27210	NCBI gene (formerly Entrezgene)	ARM repeat superfamily protein [Source:NCBI gene (formerly Entrezgene);Acc:839610]
AT1G27460	NPGR1	NPGR1	NCBI gene (formerly Entrezgene)	no pollen germination related 1 [Source:NCBI gene (formerly Entrezgene);Acc:839637]
AT1G27950	LTPG1	LTPG1	NCBI gene (formerly Entrezgene)	glycosylphosphatidylinositol-anchored lipid protein transfer 1 [Source:NCBI gene (formerly Entrezgene);Acc:839688]
AT1G28010	PGP14	ABCB14	NCBI gene (formerly Entrezgene)	P-glycoprotein 14 [Source:NCBI gene (formerly Entrezgene);Acc:839694]
AT1G28110	SCPL45	SCPL45	NCBI gene (formerly Entrezgene)	serine carboxypeptidase-like 45 [Source:NCBI gene (formerly Entrezgene);Acc:839704]
AT1G29070	NA	AT1G29070	NCBI gene (formerly Entrezgene)	Ribosomal protein L34 [Source:NCBI gene (formerly Entrezgene);Acc:839781]
AT1G29440	NA	SAUR63	NCBI gene (formerly Entrezgene)	SAUR-like auxin-responsive protein family [Source:NCBI gene (formerly Entrezgene);Acc:839820]
AT1G29910	CAB3	CAB3	NCBI gene (formerly Entrezgene)	chlorophyll A/B binding protein 3 [Source:NCBI gene (formerly Entrezgene);Acc:839869]
AT1G30380	PSAK	PSAK	NCBI gene (formerly Entrezgene)	photosystem I subunit K [Source:NCBI gene (formerly Entrezgene);Acc:839918]
AT1G30520	AAE14	AAE14	NCBI gene (formerly Entrezgene)	acyl-activating enzyme 14 [Source:NCBI gene (formerly Entrezgene);Acc:839932]
AT1G30690	NA	AT1G30690	NCBI gene (formerly Entrezgene)	Sec14p-like phosphatidylinositol transfer family protein [Source:NCBI gene (formerly Entrezgene);Acc:839949]
AT1G31690	NA	AT1G31690	NCBI gene (formerly Entrezgene)	Copper amine oxidase family protein [Source:NCBI gene (formerly Entrezgene);Acc:840056]
AT1G31860	AT-IE	AT-IE	NCBI gene (formerly Entrezgene)	histidine biosynthesis bifunctional protein (HISIE) [Source:NCBI gene (formerly Entrezgene);Acc:840076]
AT1G32200	ATS1	ATS1	NCBI gene (formerly Entrezgene)	phospholipid/glycerol acyltransferase family protein [Source:NCBI gene (formerly Entrezgene);Acc:840112]
AT1G32470	NA	AT1G32470	NCBI gene (formerly Entrezgene)	Single hybrid motif superfamily protein [Source:NCBI gene (formerly Entrezgene);Acc:840141]
AT1G32550	FdC1	FdC2	NCBI gene (formerly Entrezgene)	2Fe-2S ferredoxin-like superfamily protein [Source:NCBI gene (formerly Entrezgene);Acc:840149]
AT1G32990	PRPL11	PRPL11	NCBI gene (formerly Entrezgene)	plastid ribosomal protein l11 [Source:NCBI gene (formerly Entrezgene);Acc:840194]
AT1G33040	NACA5	NACA5	NCBI gene (formerly Entrezgene)	nascent polypeptide-associated complex subunit alpha-like protein 5 [Source:NCBI gene (formerly Entrezgene);Acc:840199]
AT1G33080	NA	AT1G33080	NCBI gene (formerly Entrezgene)	MATE efflux family protein [Source:NCBI gene (formerly Entrezgene);Acc:840204]
AT1G33290	NA	AT1G33290	NCBI gene (formerly Entrezgene)	P-loop containing nucleoside triphosphate hydrolases superfamily protein [Source:NCBI gene (formerly Entrezgene);Acc:840224]
AT1G35420	NA	AT1G35420	NCBI gene (formerly Entrezgene)	alpha/beta-Hydrolases superfamily protein [Source:NCBI gene (formerly Entrezgene);Acc:840434]
AT1G35680	NA	RPL21C	NCBI gene (formerly Entrezgene)	Ribosomal protein L21 [Source:NCBI gene (formerly Entrezgene);Acc:840472]
AT1G41830	SKS6	SKS6	NCBI gene (formerly Entrezgene)	SKU5-similar 6 [Source:NCBI gene (formerly Entrezgene);Acc:840792]
AT1G42970	GAPB	GAPB	NCBI gene (formerly Entrezgene)	glyceraldehyde-3-phosphate dehydrogenase B subunit [Source:NCBI gene (formerly Entrezgene);Acc:840895]
AT1G43560	Aty2	ty2	NCBI gene (formerly Entrezgene)	thioredoxin Y2 [Source:NCBI gene (formerly Entrezgene);Acc:840939]
AT1G44000	NA	AT1G44000	NCBI gene (formerly Entrezgene)	STAY-GREEN-like protein [Source:NCBI gene (formerly Entrezgene);Acc:841000]
AT1G44446	CH1	CH1	NCBI gene (formerly Entrezgene)	Pheophorbide a oxygenase family protein with Rieske 2Fe-2S domain-containing protein [Source:NCBI gene (formerly Entrezgene);Acc:841029]
AT1G44575	NPQ4	NPQ4	NCBI gene (formerly Entrezgene)	Chlorophyll A-B binding family protein [Source:NCBI gene (formerly Entrezgene);Acc:841033]
AT1G44920	NA	AT1G44920	NCBI gene (formerly Entrezgene)	transmembrane protein [Source:NCBI gene (formerly Entrezgene);Acc:841058]
AT1G45207	NA	AT1G45207	NCBI gene (formerly Entrezgene)	Remorin family protein [Source:NCBI gene (formerly Entrezgene);Acc:841090]
AT1G47210	CYCA3;2	CYCA3;2	NCBI gene (formerly Entrezgene)	cyclin-dependent protein kinase 3;2 [Source:NCBI gene (formerly Entrezgene);Acc:841124]
AT1G47290	AT3BETAHSD/D1	3BETAHSD/D1	NCBI gene (formerly Entrezgene)	3beta-hydroxysteroid-dehydrogenase/decarboxylase [Source:NCBI gene (formerly Entrezgene);Acc:841132]
AT1G47655	NA	AT1G47655	NCBI gene (formerly Entrezgene)	Dof-type zinc finger DNA-binding family protein [Source:NCBI gene (formerly Entrezgene);Acc:841175]
AT1G48350	NA	EMB3105	NCBI gene (formerly Entrezgene)	Ribosomal L18p/L5e family protein [Source:NCBI gene (formerly Entrezgene);Acc:841255]
AT1G48480	RKL1	RKL1	NCBI gene (formerly Entrezgene)	receptor-like kinase 1 [Source:NCBI gene (formerly Entrezgene);Acc:841269]
AT1G48520	GATB	GATB	NCBI gene (formerly Entrezgene)	GLU-ADT subunit B [Source:NCBI gene (formerly Entrezgene);Acc:841273]
AT1G48950	NA	AT1G48950	NCBI gene (formerly Entrezgene)	C3HC zinc finger-like protein [Source:NCBI gene (formerly Entrezgene);Acc:841317]
AT1G49380	NA	AT1G49380	NCBI gene (formerly Entrezgene)	cytochrome c biosis protein family [Source:NCBI gene (formerly Entrezgene);Acc:841361]
AT1G49580	NA	AT1G49580	NCBI gene (formerly Entrezgene)	Calcium-dependent protein kinase (CDPK) family protein [Source:NCBI gene (formerly Entrezgene);Acc:841382]
AT1G49730	NA	AT1G49730	NCBI gene (formerly Entrezgene)	Protein kinase superfamily protein [Source:NCBI gene (formerly Entrezgene);Acc:841396]
AT1G50575	NA	AT1G50575	NCBI gene (formerly Entrezgene)	Putative lysine decarboxylase family protein [Source:NCBI gene (formerly Entrezgene);Acc:841479]
AT1G50710	NA	2023-08-04	NCBI gene (formerly Entrezgene)	HAUS augmin-like complex subunit [Source:NCBI gene (formerly Entrezgene);Acc:841493]
AT1G50732	NA	AT1G50732	NCBI gene (formerly Entrezgene)	transmembrane protein [Source:NCBI gene (formerly Entrezgene);Acc:10723115]
AT1G51400	NA	AT1G51400	NCBI gene (formerly Entrezgene)	Photosystem II 5 kD protein [Source:NCBI gene (formerly Entrezgene);Acc:841564]
AT1G52230	PSAH2	PSAH2	NCBI gene (formerly Entrezgene)	photosystem I subunit H2 [Source:NCBI gene (formerly Entrezgene);Acc:841653]
AT1G52340	ABA2	ABA2	NCBI gene (formerly Entrezgene)	NAD(P)-binding Rossmann-fold superfamily protein [Source:NCBI gene (formerly Entrezgene);Acc:841665]
AT1G52670	NA	AT1G52670	NCBI gene (formerly Entrezgene)	Single hybrid motif superfamily protein [Source:NCBI gene (formerly Entrezgene);Acc:841699]
AT1G53250	NA	AT1G53250	NCBI gene (formerly Entrezgene)	histone-lysine N-methyltransferase, H3 lysine-79 specific-like protein [Source:NCBI gene (formerly Entrezgene);Acc:841758]
AT1G53290	NA	AT1G53290	NCBI gene (formerly Entrezgene)	Galactosyltransferase family protein [Source:NCBI gene (formerly Entrezgene);Acc:841763]
AT1G53300	TTL1	TTL1	NCBI gene (formerly Entrezgene)	tetratricopetide-repeat thioredoxin-like 1 [Source:NCBI gene (formerly Entrezgene);Acc:841764]
AT1G54820	NA	AT1G54820	NCBI gene (formerly Entrezgene)	Protein kinase superfamily protein [Source:NCBI gene (formerly Entrezgene);Acc:841921]
AT1G55260	NA	AT1G55260	NCBI gene (formerly Entrezgene)	Bifunctional inhibitor/lipid-transfer protein/seed storage 2S albumin superfamily protein [Source:NCBI gene (formerly Entrezgene);Acc:841970]
AT1G55370	NDF5	NDF5	NCBI gene (formerly Entrezgene)	NDH-dependent cyclic electron flow 5 [Source:NCBI gene (formerly Entrezgene);Acc:841984]
AT1G55490	CPN60B	CPN60B	NCBI gene (formerly Entrezgene)	chaperonin 60 beta [Source:NCBI gene (formerly Entrezgene);Acc:841996]
AT1G55690	NA	AT1G55690	NCBI gene (formerly Entrezgene)	Sec14p-like phosphatidylinositol transfer family protein [Source:NCBI gene (formerly Entrezgene);Acc:842018]
AT1G55805	NA	AT1G55805	NCBI gene (formerly Entrezgene)	BolA-like family protein [Source:NCBI gene (formerly Entrezgene);Acc:842030]
AT1G56190	NA	AT1G56190	NCBI gene (formerly Entrezgene)	Phosphoglycerate kinase family protein [Source:NCBI gene (formerly Entrezgene);Acc:842072]
AT1G59560	ZCF61	ZCF61	NCBI gene (formerly Entrezgene)	E3 Ubiquitin ligase family protein [Source:NCBI gene (formerly Entrezgene);Acc:842247]
AT1G59840	CCB4	CCB4	NCBI gene (formerly Entrezgene)	cofactor assembly of complex C [Source:NCBI gene (formerly Entrezgene);Acc:842278]
AT1G60550	ECHID	ECHID	NCBI gene (formerly Entrezgene)	enoyl-CoA hydratase/isomerase D [Source:NCBI gene (formerly Entrezgene);Acc:842350]
AT1G60600	ABC4	ABC4	NCBI gene (formerly Entrezgene)	UbiA prenyltransferase family protein [Source:NCBI gene (formerly Entrezgene);Acc:842354]
AT1G60790	TBL2	TBL2	NCBI gene (formerly Entrezgene)	trichome birefringence-like protein (DUF828) [Source:NCBI gene (formerly Entrezgene);Acc:842373]
AT1G60950	FED A	FED A	NCBI gene (formerly Entrezgene)	2Fe-2S ferredoxin-like superfamily protein [Source:NCBI gene (formerly Entrezgene);Acc:842386]
AT1G61170	NA	AT1G61170	NCBI gene (formerly Entrezgene)	NA
AT1G62480	NA	AT1G62480	NCBI gene (formerly Entrezgene)	Vacuolar calcium-binding protein-like protein [Source:NCBI gene (formerly Entrezgene);Acc:842545]
AT1G63110	NA	AT1G63110	NCBI gene (formerly Entrezgene)	GPI transamidase subunit PIG-U [Source:NCBI gene (formerly Entrezgene);Acc:842615]
AT1G64150	NA	AT1G64150	NCBI gene (formerly Entrezgene)	Uncharacterized protein family (UPF0016) [Source:NCBI gene (formerly Entrezgene);Acc:842719]
AT1G64355	NA	AT1G64355	NCBI gene (formerly Entrezgene)	1-acyl-sn-glycerol-3-phosphate acyltransferase [Source:NCBI gene (formerly Entrezgene);Acc:842742]
AT1G64510	NA	AT1G64510	NCBI gene (formerly Entrezgene)	Translation elongation factor EF1B/ribosomal protein S6 family protein [Source:NCBI gene (formerly Entrezgene);Acc:842759]
AT1G64670	BDG1	BDG1	NCBI gene (formerly Entrezgene)	alpha/beta-Hydrolases superfamily protein [Source:NCBI gene (formerly Entrezgene);Acc:842775]
AT1G64780	ATAMT1;2	AMT1;2	NCBI gene (formerly Entrezgene)	ammonium transporter 1;2 [Source:NCBI gene (formerly Entrezgene);Acc:842786]
AT1G64860	SIGA	SIGA	NCBI gene (formerly Entrezgene)	sigma factor A [Source:NCBI gene (formerly Entrezgene);Acc:842794]
AT1G65010	NA	AT1G65010	NCBI gene (formerly Entrezgene)	WEB family protein (DUF827) [Source:NCBI gene (formerly Entrezgene);Acc:842809]
AT1G66050	VIM2	VIM2	NCBI gene (formerly Entrezgene)	Zinc finger (C3HC4-type RING finger) family protein [Source:NCBI gene (formerly Entrezgene);Acc:842919]
AT1G66190	NA	AT1G66190	NCBI gene (formerly Entrezgene)	NA
AT1G66430	NA	AT1G66430	NCBI gene (formerly Entrezgene)	pfkB-like carbohydrate kinase family protein [Source:NCBI gene (formerly Entrezgene);Acc:842961]
AT1G67090	RBCS1A	RBCS1A	NCBI gene (formerly Entrezgene)	ribulose bisphosphate carboxylase small chain 1A [Source:NCBI gene (formerly Entrezgene);Acc:843029]
AT1G67180	NA	AT1G67180	NCBI gene (formerly Entrezgene)	zinc finger (C3HC4-type RING finger) family protein / BRCT domain-containing protein [Source:NCBI gene (formerly Entrezgene);Acc:843038]
AT1G67700	NA	AT1G67700	NCBI gene (formerly Entrezgene)	multidrug resistance protein [Source:NCBI gene (formerly Entrezgene);Acc:843095]
AT1G67830	ATFXG1	FXG1	NCBI gene (formerly Entrezgene)	alpha-fucosidase 1 [Source:NCBI gene (formerly Entrezgene);Acc:843109]
AT1G67910	NA	AT1G67910	NCBI gene (formerly Entrezgene)	NA
AT1G68060	ATMAP70-1	MAP70-1	NCBI gene (formerly Entrezgene)	microtubule-associated proteins 70-1 [Source:NCBI gene (formerly Entrezgene);Acc:843134]
AT1G68110	NA	AT1G68110	NCBI gene (formerly Entrezgene)	ENTH/ANTH/VHS superfamily protein [Source:NCBI gene (formerly Entrezgene);Acc:843139]
AT1G68190	NA	BBX27	NCBI gene (formerly Entrezgene)	B-box zinc finger family protein [Source:NCBI gene (formerly Entrezgene);Acc:843148]
AT1G68640	PAN	PAN	NCBI gene (formerly Entrezgene)	bZIP transcription factor family protein [Source:NCBI gene (formerly Entrezgene);Acc:843194]
AT1G68840	RAV2	RAV2	NCBI gene (formerly Entrezgene)	related to ABI3/VP1 2 [Source:NCBI gene (formerly Entrezgene);Acc:843216]
AT1G68890	NA	PHYLLO	NCBI gene (formerly Entrezgene)	2-oxoglutarate decarboxylase/hydro-lyase/magnesium ion-binding protein [Source:NCBI gene (formerly Entrezgene);Acc:843222]
AT1G69420	NA	AT1G69420	NCBI gene (formerly Entrezgene)	DHHC-type zinc finger family protein [Source:NCBI gene (formerly Entrezgene);Acc:843274]
AT1G69700	ATHVA22C	HVA22C	NCBI gene (formerly Entrezgene)	HVA22 homologue C [Source:NCBI gene (formerly Entrezgene);Acc:843306]
AT1G69830	ATAMY3	AMY3	NCBI gene (formerly Entrezgene)	alpha-amylase-like 3 [Source:NCBI gene (formerly Entrezgene);Acc:843319]
AT1G70150	NA	AT1G70150	NCBI gene (formerly Entrezgene)	zinc ion binding protein [Source:NCBI gene (formerly Entrezgene);Acc:843351]
AT1G70370	PG2	PG2	NCBI gene (formerly Entrezgene)	polygalacturonase 2 [Source:NCBI gene (formerly Entrezgene);Acc:843373]
AT1G70710	ATGH9B1	GH9B1	NCBI gene (formerly Entrezgene)	glycosyl hydrolase 9B1 [Source:NCBI gene (formerly Entrezgene);Acc:843408]
AT1G71020	NA	AT1G71020	NCBI gene (formerly Entrezgene)	ARM repeat superfamily protein [Source:NCBI gene (formerly Entrezgene);Acc:843442]
AT1G71790	NA	CPB	NCBI gene (formerly Entrezgene)	Subunits of heterodimeric actin filament capping protein Capz superfamily [Source:NCBI gene (formerly Entrezgene);Acc:843509]
AT1G72170	NA	AT1G72170	NCBI gene (formerly Entrezgene)	MICOS complex subunit, putative (DUF543) [Source:NCBI gene (formerly Entrezgene);Acc:843548]
AT1G72410	NA	AT1G72410	NCBI gene (formerly Entrezgene)	COP1-interacting protein-like protein [Source:NCBI gene (formerly Entrezgene);Acc:843573]
AT1G72640	NA	AT1G72640	NCBI gene (formerly Entrezgene)	NAD(P)-binding Rossmann-fold superfamily protein [Source:NCBI gene (formerly Entrezgene);Acc:843596]
AT1G73060	LPA3	LPA3	NCBI gene (formerly Entrezgene)	Low PSII Accumulation 3 [Source:NCBI gene (formerly Entrezgene);Acc:843637]
AT1G73655	NA	AT1G73655	NCBI gene (formerly Entrezgene)	FKBP-like peptidyl-prolyl cis-trans isomerase family protein [Source:NCBI gene (formerly Entrezgene);Acc:843700]
AT1G74470	NA	AT1G74470	NCBI gene (formerly Entrezgene)	Pyridine nucleotide-disulfide oxidoreductase family protein [Source:NCBI gene (formerly Entrezgene);Acc:843788]
AT1G74690	IQD31	IQD31	NCBI gene (formerly Entrezgene)	IQ-domain 31 [Source:NCBI gene (formerly Entrezgene);Acc:843808]
AT1G74720	QKY	QKY	NCBI gene (formerly Entrezgene)	C2 calcium/lipid-binding plant phosphoribosyltransferase family protein [Source:NCBI gene (formerly Entrezgene);Acc:843811]
AT1G74790	NA	AT1G74790	NCBI gene (formerly Entrezgene)	catalytics [Source:NCBI gene (formerly Entrezgene);Acc:843818]
AT1G74970	RPS9	RPS9	NCBI gene (formerly Entrezgene)	ribosomal protein S9 [Source:NCBI gene (formerly Entrezgene);Acc:843836]
AT1G75030	ATLP-3	TLP-3	NCBI gene (formerly Entrezgene)	thaumatin-like protein 3 [Source:NCBI gene (formerly Entrezgene);Acc:843841]
AT1G75120	RRA1	RRA1	NCBI gene (formerly Entrezgene)	Nucleotide-diphospho-sugar transferase family protein [Source:NCBI gene (formerly Entrezgene);Acc:843849]
AT1G75350	emb2184	emb2184	NCBI gene (formerly Entrezgene)	Ribosomal protein L31 [Source:NCBI gene (formerly Entrezgene);Acc:843871]
AT1G75680	AtGH9B7	GH9B7	NCBI gene (formerly Entrezgene)	glycosyl hydrolase 9B7 [Source:NCBI gene (formerly Entrezgene);Acc:843902]
AT1G75690	NA	LQY1	NCBI gene (formerly Entrezgene)	DnaJ/Hsp40 cysteine-rich domain superfamily protein [Source:NCBI gene (formerly Entrezgene);Acc:843903]
AT1G76110	NA	AT1G76110	NCBI gene (formerly Entrezgene)	HMG (high mobility group) box protein with ARID/BRIGHT DNA-binding domain-containing protein [Source:NCBI gene (formerly Entrezgene);Acc:843943]
AT1G76405	NA	AT1G76405	NCBI gene (formerly Entrezgene)	outer envelope pore 21B-like protein [Source:NCBI gene (formerly Entrezgene);Acc:843973]
AT1G76450	NA	AT1G76450	NCBI gene (formerly Entrezgene)	Photosystem II reaction center PsbP family protein [Source:NCBI gene (formerly Entrezgene);Acc:843978]
AT1G76710	ASHH1;SDG26	ASHH1	NCBI gene (formerly Entrezgene)	SET domain group 26 [Source:NCBI gene (formerly Entrezgene);Acc:844005]
AT1G76870	NA	AT1G76870	NCBI gene (formerly Entrezgene)	transcription factor [Source:NCBI gene (formerly Entrezgene);Acc:844022]
AT1G77090	NA	AT1G77090	NCBI gene (formerly Entrezgene)	thylakoid lumenal protein (Mog1/PsbP/DUF1795-like photosystem II reaction center PsbP family protein) [Source:NCBI gene (formerly Entrezgene);Acc:844043]
AT1G77590	LACS9	LACS9	NCBI gene (formerly Entrezgene)	long chain acyl-CoA synthetase 9 [Source:NCBI gene (formerly Entrezgene);Acc:844094]
AT1G78180	NA	AT1G78180	NCBI gene (formerly Entrezgene)	Mitochondrial substrate carrier family protein [Source:NCBI gene (formerly Entrezgene);Acc:844154]
AT1G78260	NA	AT1G78260	NCBI gene (formerly Entrezgene)	RNA-binding (RRM/RBD/RNP motifs) family protein [Source:NCBI gene (formerly Entrezgene);Acc:844161]
AT1G78430	RIP2	RIP4	NCBI gene (formerly Entrezgene)	ROP interactive partner 2 [Source:NCBI gene (formerly Entrezgene);Acc:844179]
AT1G78630	emb1473	emb1473	NCBI gene (formerly Entrezgene)	Ribosomal protein L13 family protein [Source:NCBI gene (formerly Entrezgene);Acc:844199]
AT1G78915	NA	AT1G78915	NCBI gene (formerly Entrezgene)	Tetratricopeptide repeat (TPR)-like superfamily protein [Source:NCBI gene (formerly Entrezgene);Acc:844230]
AT1G79500	AtkdsA1	AtkdsA1	NCBI gene (formerly Entrezgene)	Aldolase-type TIM barrel family protein [Source:NCBI gene (formerly Entrezgene);Acc:844288]
AT1G79700	NA	WRI4	NCBI gene (formerly Entrezgene)	Integrase-type DNA-binding superfamily protein [Source:NCBI gene (formerly Entrezgene);Acc:844309]
AT1G79850	RPS17	RPS17	NCBI gene (formerly Entrezgene)	ribosomal protein S17 [Source:NCBI gene (formerly Entrezgene);Acc:844324]
AT1G80030	NA	AT1G80030	NCBI gene (formerly Entrezgene)	Molecular chaperone Hsp40/DnaJ family protein [Source:NCBI gene (formerly Entrezgene);Acc:844343]
AT1G80080	TMM	TMM	NCBI gene (formerly Entrezgene)	Leucine-rich repeat (LRR) family protein [Source:NCBI gene (formerly Entrezgene);Acc:844348]
AT1G80350	ERH3	ERH3	NCBI gene (formerly Entrezgene)	P-loop containing nucleoside triphosphate hydrolases superfamily protein [Source:NCBI gene (formerly Entrezgene);Acc:844375]
AT1G80690	NA	AT1G80690	NCBI gene (formerly Entrezgene)	PPPDE putative thiol peptidase family protein [Source:NCBI gene (formerly Entrezgene);Acc:844408]
AT2G01755	NA	AT2G01755	NCBI gene (formerly Entrezgene)	NA
AT2G01818	NA	AT2G01818	NCBI gene (formerly Entrezgene)	PLATZ transcription factor family protein [Source:NCBI gene (formerly Entrezgene);Acc:5007863]
AT2G01820	NA	AT2G01820	NCBI gene (formerly Entrezgene)	Leucine-rich repeat protein kinase family protein [Source:NCBI gene (formerly Entrezgene);Acc:814713]
AT2G02130	PDF2.3	LCR68	NCBI gene (formerly Entrezgene)	low-molecular-weight cysteine-rich 68 [Source:NCBI gene (formerly Entrezgene);Acc:814744]
AT2G02170	NA	AT2G02170	NCBI gene (formerly Entrezgene)	Remorin family protein [Source:NCBI gene (formerly Entrezgene);Acc:814748]
AT2G02410	NA	AT2G02410	NCBI gene (formerly Entrezgene)	yacP-like NYN domain protein [Source:NCBI gene (formerly Entrezgene);Acc:814772]
AT2G02500	ISPD	ISPD	NCBI gene (formerly Entrezgene)	Nucleotide-diphospho-sugar transferases superfamily protein [Source:NCBI gene (formerly Entrezgene);Acc:814779]
AT2G03280	NA	AT2G03280	NCBI gene (formerly Entrezgene)	O-fucosyltransferase family protein [Source:NCBI gene (formerly Entrezgene);Acc:814857]
AT2G03350	NA	AT2G03350	NCBI gene (formerly Entrezgene)	DUF538 family protein (Protein of unknown function, DUF538) [Source:NCBI gene (formerly Entrezgene);Acc:814864]
AT2G03420	NA	AT2G03420	NCBI gene (formerly Entrezgene)	NA
AT2G04780	FLA7	FLA7	NCBI gene (formerly Entrezgene)	FASCICLIN-like arabinoogalactan 7 [Source:NCBI gene (formerly Entrezgene);Acc:815021]
AT2G05210	AtPOT1a	AtPOT1a	NCBI gene (formerly Entrezgene)	Nucleic acid-binding, OB-fold-like protein [Source:NCBI gene (formerly Entrezgene);Acc:815069]
AT2G05790	NA	AT2G05790	NCBI gene (formerly Entrezgene)	O-Glycosyl hydrolases family 17 protein [Source:NCBI gene (formerly Entrezgene);Acc:815130]
AT2G05990	MOD1	MOD1	NCBI gene (formerly Entrezgene)	NAD(P)-binding Rossmann-fold superfamily protein [Source:NCBI gene (formerly Entrezgene);Acc:815152]
AT2G06850	EXGT-A1	XTH4	NCBI gene (formerly Entrezgene)	xyloglucan endotransglucosylase/hydrolase 4 [Source:NCBI gene (formerly Entrezgene);Acc:815247]
AT2G07050	CAS1	CAS1	NCBI gene (formerly Entrezgene)	cycloartenol synthase 1 [Source:NCBI gene (formerly Entrezgene);Acc:815275]
AT2G10940	NA	AT2G10940	NCBI gene (formerly Entrezgene)	Bifunctional inhibitor/lipid-transfer protein/seed storage 2S albumin superfamily protein [Source:NCBI gene (formerly Entrezgene);Acc:815558]
AT2G13820	NA	XYP2	NCBI gene (formerly Entrezgene)	Bifunctional inhibitor/lipid-transfer protein/seed storage 2S albumin superfamily protein [Source:NCBI gene (formerly Entrezgene);Acc:815865]
AT2G14890	AGP9	AGP9	NCBI gene (formerly Entrezgene)	arabinogalactan protein 9 [Source:NCBI gene (formerly Entrezgene);Acc:815978]
AT2G15280	NA	AT2G15280	NCBI gene (formerly Entrezgene)	Reticulon family protein [Source:NCBI gene (formerly Entrezgene);Acc:816017]
AT2G16390	DRD1	DRD1	NCBI gene (formerly Entrezgene)	SNF2 domain-containing protein / helicase domain-containing protein [Source:NCBI gene (formerly Entrezgene);Acc:816136]
AT2G16630	NA	AT2G16630	NCBI gene (formerly Entrezgene)	Pollen Ole e 1 allergen and extensin family protein [Source:NCBI gene (formerly Entrezgene);Acc:816164]
AT2G16750	NA	AT2G16750	NCBI gene (formerly Entrezgene)	kinase with adenine nucleotide alpha hydrolases-like domain-containing protein [Source:NCBI gene (formerly Entrezgene);Acc:816176]
AT2G17370	HMG2	HMG2	NCBI gene (formerly Entrezgene)	3-hydroxy-3-methylglutaryl-CoA reductase 2 [Source:NCBI gene (formerly Entrezgene);Acc:816244]
AT2G17780	MCA2	MCA2	NCBI gene (formerly Entrezgene)	PLAC8 family protein [Source:NCBI gene (formerly Entrezgene);Acc:816287]
AT2G17800	ARAC1	ARAC1	NCBI gene (formerly Entrezgene)	RAC-like 1 [Source:NCBI gene (formerly Entrezgene);Acc:816290]
AT2G17972	NA	AT2G17972	NCBI gene (formerly Entrezgene)	transmembrane protein [Source:NCBI gene (formerly Entrezgene);Acc:816308]
AT2G18400	NA	AT2G18400	NCBI gene (formerly Entrezgene)	ribosomal protein L6 family protein [Source:NCBI gene (formerly Entrezgene);Acc:816355]
AT2G18990	TXND9	TXND9	NCBI gene (formerly Entrezgene)	thioredoxin-like/ATP-binding protein [Source:NCBI gene (formerly Entrezgene);Acc:816416]
AT2G19940	NA	AT2G19940	NCBI gene (formerly Entrezgene)	Putative N-acetyl-gamma-glutamyl-phosphate reductase [Source:NCBI gene (formerly Entrezgene);Acc:816513]
AT2G20240	NA	TRM17	NCBI gene (formerly Entrezgene)	GPI-anchored adhesin-like protein, putative (DUF3741) [Source:NCBI gene (formerly Entrezgene);Acc:816543]
AT2G20250	NA	AT2G20250	NCBI gene (formerly Entrezgene)	NA
AT2G20360	NA	AT2G20360	NCBI gene (formerly Entrezgene)	NAD(P)-binding Rossmann-fold superfamily protein [Source:NCBI gene (formerly Entrezgene);Acc:816555]
AT2G20890	PSB29	PSB29	NCBI gene (formerly Entrezgene)	photosystem II reaction center PSB29 protein [Source:NCBI gene (formerly Entrezgene);Acc:816623]
AT2G20990	SYTA	SYTA	NCBI gene (formerly Entrezgene)	synaptotagmin A [Source:NCBI gene (formerly Entrezgene);Acc:816633]
AT2G21170	TIM	TIM	NCBI gene (formerly Entrezgene)	triosephosphate isomerase [Source:NCBI gene (formerly Entrezgene);Acc:816652]
AT2G21280	GC1	SULA	NCBI gene (formerly Entrezgene)	NAD(P)-binding Rossmann-fold superfamily protein [Source:NCBI gene (formerly Entrezgene);Acc:816667]
AT2G21330	FBA1	FBA1	NCBI gene (formerly Entrezgene)	fructose-bisphosphate aldolase 1 [Source:NCBI gene (formerly Entrezgene);Acc:816672]
AT2G21385	NA	AT2G21385	NCBI gene (formerly Entrezgene)	NA
AT2G21530	NA	AT2G21530	NCBI gene (formerly Entrezgene)	SMAD/FHA domain-containing protein [Source:NCBI gene (formerly Entrezgene);Acc:816692]
AT2G21540	SFH3	SFH3	NCBI gene (formerly Entrezgene)	SEC14-like 3 [Source:NCBI gene (formerly Entrezgene);Acc:816693]
AT2G22230	NA	AT2G22230	NCBI gene (formerly Entrezgene)	Thioesterase superfamily protein [Source:NCBI gene (formerly Entrezgene);Acc:816756]
AT2G22670	IAA8	IAA8	NCBI gene (formerly Entrezgene)	indoleacetic acid-induced protein 8 [Source:NCBI gene (formerly Entrezgene);Acc:816798]
AT2G23380	CLF	CLF	NCBI gene (formerly Entrezgene)	SET domain-containing protein [Source:NCBI gene (formerly Entrezgene);Acc:816870]
AT2G23820	NA	AT2G23820	NCBI gene (formerly Entrezgene)	Metal-dependent phosphohydrolase [Source:NCBI gene (formerly Entrezgene);Acc:816914]
AT2G24020	NA	AT2G24020	NCBI gene (formerly Entrezgene)	Putative BCR, YbaB family COG0718 [Source:NCBI gene (formerly Entrezgene);Acc:816936]
AT2G24090	NA	PRPL35	NCBI gene (formerly Entrezgene)	Ribosomal protein L35 [Source:NCBI gene (formerly Entrezgene);Acc:816943]
AT2G24150	HHP3	HHP3	NCBI gene (formerly Entrezgene)	heptahelical protein 3 [Source:NCBI gene (formerly Entrezgene);Acc:816949]
AT2G24350	NA	AT2G24350	NCBI gene (formerly Entrezgene)	RNA binding (RRM/RBD/RNP motifs) family protein [Source:NCBI gene (formerly Entrezgene);Acc:816971]
AT2G24395	NA	AT2G24395	NCBI gene (formerly Entrezgene)	chaperone protein dnaJ-like protein [Source:NCBI gene (formerly Entrezgene);Acc:816975]
AT2G24610	ATCNGC14	CNGC14	NCBI gene (formerly Entrezgene)	cyclic nucleotide-gated channel 14 [Source:NCBI gene (formerly Entrezgene);Acc:816997]
AT2G25830	NA	AT2G25830	NCBI gene (formerly Entrezgene)	YebC-like protein [Source:NCBI gene (formerly Entrezgene);Acc:817125]
AT2G25840	OVA4	OVA4	NCBI gene (formerly Entrezgene)	Nucleotidylyl transferase superfamily protein [Source:NCBI gene (formerly Entrezgene);Acc:817126]
AT2G25870	NA	AT2G25870	NCBI gene (formerly Entrezgene)	haloacid dehalogenase-like hydrolase family protein [Source:NCBI gene (formerly Entrezgene);Acc:817128]
AT2G26260	AT3BETAHSD/D2	3BETAHSD/D2	NCBI gene (formerly Entrezgene)	3beta-hydroxysteroid-dehydrogenase/decarboxylase [Source:NCBI gene (formerly Entrezgene);Acc:817166]
AT2G26550	HO2	HO2	NCBI gene (formerly Entrezgene)	heme oxygenase 2 [Source:NCBI gene (formerly Entrezgene);Acc:817196]
AT2G27130	NA	AT2G27130	NCBI gene (formerly Entrezgene)	Bifunctional inhibitor/lipid-transfer protein/seed storage 2S albumin superfamily protein [Source:NCBI gene (formerly Entrezgene);Acc:817255]
AT2G27720	NA	AT2G27720	NCBI gene (formerly Entrezgene)	60S acidic ribosomal protein family [Source:NCBI gene (formerly Entrezgene);Acc:817318]
AT2G28150	NA	AT2G28150	NCBI gene (formerly Entrezgene)	UPSTREAM OF FLC protein (DUF966) [Source:NCBI gene (formerly Entrezgene);Acc:817361]
AT2G28470	BGAL8	BGAL8	NCBI gene (formerly Entrezgene)	beta-galactosidase 8 [Source:NCBI gene (formerly Entrezgene);Acc:817395]
AT2G28605	NA	AT2G28605	NCBI gene (formerly Entrezgene)	Photosystem II reaction center PsbP family protein [Source:NCBI gene (formerly Entrezgene);Acc:817409]
AT2G29050	ATRBL1	RBL1	NCBI gene (formerly Entrezgene)	RHOMBOID-like 1 [Source:NCBI gene (formerly Entrezgene);Acc:817453]
AT2G29980	FAD3	FAD3	NCBI gene (formerly Entrezgene)	fatty acid desaturase 3 [Source:NCBI gene (formerly Entrezgene);Acc:817548]
AT2G30150	NA	AT2G30150	NCBI gene (formerly Entrezgene)	UDP-Glycosyltransferase superfamily protein [Source:NCBI gene (formerly Entrezgene);Acc:817567]
AT2G31170	SYCO ARATH	SYCO ARATH	NCBI gene (formerly Entrezgene)	Cysteinyl-tRNA synthetase, class Ia family protein [Source:NCBI gene (formerly Entrezgene);Acc:817673]
AT2G32000	NA	AT2G32000	NCBI gene (formerly Entrezgene)	DNA topoisomerase, type IA, core [Source:NCBI gene (formerly Entrezgene);Acc:817760]
AT2G32450	NA	AT2G32450	NCBI gene (formerly Entrezgene)	Calcium-binding tetratricopeptide family protein [Source:NCBI gene (formerly Entrezgene);Acc:817806]
AT2G32640	NA	AT2G32640	NCBI gene (formerly Entrezgene)	Lycopene beta/epsilon cyclase protein [Source:NCBI gene (formerly Entrezgene);Acc:817824]
AT2G32690	ATGRP23	GRP23	NCBI gene (formerly Entrezgene)	glycine-rich protein 23 [Source:NCBI gene (formerly Entrezgene);Acc:3768391]
AT2G32940	AGO6	AGO6	NCBI gene (formerly Entrezgene)	Argonaute family protein [Source:NCBI gene (formerly Entrezgene);Acc:817856]
AT2G33255	NA	AT2G33255	NCBI gene (formerly Entrezgene)	Haloacid dehalogenase-like hydrolase (HAD) superfamily protein [Source:NCBI gene (formerly Entrezgene);Acc:817888]
AT2G33330	PDLP3	PDLP3	NCBI gene (formerly Entrezgene)	plasmodesmata-located protein 3 [Source:NCBI gene (formerly Entrezgene);Acc:817896]
AT2G33450	NA	PRPL28	NCBI gene (formerly Entrezgene)	Ribosomal L28 family [Source:NCBI gene (formerly Entrezgene);Acc:817910]
AT2G33800	NA	EMB3113	NCBI gene (formerly Entrezgene)	Ribosomal protein S5 family protein [Source:NCBI gene (formerly Entrezgene);Acc:817947]
AT2G34520	RPS14	RPS14	NCBI gene (formerly Entrezgene)	mitochondrial ribosomal protein S14 [Source:NCBI gene (formerly Entrezgene);Acc:818015]
AT2G34560	NA	CCP1	NCBI gene (formerly Entrezgene)	P-loop containing nucleoside triphosphate hydrolases superfamily protein [Source:NCBI gene (formerly Entrezgene);Acc:818020]
AT2G34620	NA	AT2G34620	NCBI gene (formerly Entrezgene)	Mitochondrial transcription termination factor family protein [Source:NCBI gene (formerly Entrezgene);Acc:818027]
AT2G34680	AIR9	AIR9	NCBI gene (formerly Entrezgene)	Outer arm dynein light chain 1 protein [Source:NCBI gene (formerly Entrezgene);Acc:818033]
AT2G35450	NA	AT2G35450	NCBI gene (formerly Entrezgene)	catalytic/ hydrolase [Source:NCBI gene (formerly Entrezgene);Acc:818110]
AT2G35500	SKL2	SKL2	NCBI gene (formerly Entrezgene)	shikimate kinase like 2 [Source:NCBI gene (formerly Entrezgene);Acc:818115]
AT2G36000	NA	EMB3114	NCBI gene (formerly Entrezgene)	Mitochondrial transcription termination factor family protein [Source:NCBI gene (formerly Entrezgene);Acc:818173]
AT2G36050	ATOFP15	OFP15	NCBI gene (formerly Entrezgene)	ovate family protein 15 [Source:NCBI gene (formerly Entrezgene);Acc:818178]
AT2G36530	LOS2	LOS2	NCBI gene (formerly Entrezgene)	Enolase [Source:NCBI gene (formerly Entrezgene);Acc:818226]
AT2G36620	RPL24A	RPL24A	NCBI gene (formerly Entrezgene)	ribosomal protein L24 [Source:NCBI gene (formerly Entrezgene);Acc:818234]
AT2G36885	NA	AT2G36885	NCBI gene (formerly Entrezgene)	translation initiation factor [Source:NCBI gene (formerly Entrezgene);Acc:818261]
AT2G36990	SIGF	SIGF	NCBI gene (formerly Entrezgene)	RNApolymerase sigma-subunit F [Source:NCBI gene (formerly Entrezgene);Acc:818273]
AT2G37050	NA	AT2G37050	NCBI gene (formerly Entrezgene)	Leucine-rich repeat protein kinase family protein [Source:NCBI gene (formerly Entrezgene);Acc:818281]
AT2G37220	NA	AT2G37220	NCBI gene (formerly Entrezgene)	RNA-binding (RRM/RBD/RNP motifs) family protein [Source:NCBI gene (formerly Entrezgene);Acc:818299]
AT2G37450	NA	UMAMIT13	NCBI gene (formerly Entrezgene)	nodulin MtN21 /EamA-like transporter family protein [Source:NCBI gene (formerly Entrezgene);Acc:818322]
AT2G37470	NA	AT2G37470	NCBI gene (formerly Entrezgene)	Histone superfamily protein [Source:NCBI gene (formerly Entrezgene);Acc:818324]
AT2G37585	NA	AT2G37585	NCBI gene (formerly Entrezgene)	Core-2/I-branching beta-1,6-N-acetylglucosaminyltransferase family protein [Source:NCBI gene (formerly Entrezgene);Acc:818335]
AT2G37660	NA	AT2G37660	NCBI gene (formerly Entrezgene)	NAD(P)-binding Rossmann-fold superfamily protein [Source:NCBI gene (formerly Entrezgene);Acc:818343]
AT2G37790	NA	AKR4C10	NCBI gene (formerly Entrezgene)	NAD(P)-linked oxidoreductase superfamily protein [Source:NCBI gene (formerly Entrezgene);Acc:818356]
AT2G38025	NA	AT2G38025	NCBI gene (formerly Entrezgene)	Cysteine proteinases superfamily protein [Source:NCBI gene (formerly Entrezgene);Acc:818381]
AT2G38140	PSRP4	PSRP4	NCBI gene (formerly Entrezgene)	plastid-specific ribosomal protein 4 [Source:NCBI gene (formerly Entrezgene);Acc:818392]
AT2G38330	NA	AT2G38330	NCBI gene (formerly Entrezgene)	MATE efflux family protein [Source:NCBI gene (formerly Entrezgene);Acc:818413]
AT2G38540	LP1	LP1	NCBI gene (formerly Entrezgene)	lipid transfer protein 1 [Source:NCBI gene (formerly Entrezgene);Acc:818436]
AT2G38570	NA	AT2G38570	NCBI gene (formerly Entrezgene)	NA
AT2G38700	MVD1	MVD1	NCBI gene (formerly Entrezgene)	mevalonate diphosphate decarboxylase 1 [Source:NCBI gene (formerly Entrezgene);Acc:818452]
AT2G38720	MAP65-5	MAP65-5	NCBI gene (formerly Entrezgene)	microtubule-associated protein 65-5 [Source:NCBI gene (formerly Entrezgene);Acc:818454]
AT2G39090	APC7	APC7	NCBI gene (formerly Entrezgene)	tetratricopeptide repeat (TPR)-containing protein [Source:NCBI gene (formerly Entrezgene);Acc:818495]
AT2G39140	SVR1	SVR1	NCBI gene (formerly Entrezgene)	pseudouridine synthase family protein [Source:NCBI gene (formerly Entrezgene);Acc:818500]
AT2G39190	ATATH8	ATATH8	NCBI gene (formerly Entrezgene)	Protein kinase superfamily protein [Source:NCBI gene (formerly Entrezgene);Acc:818504]
AT2G40010	NA	AT2G40010	NCBI gene (formerly Entrezgene)	Ribosomal protein L10 family protein [Source:NCBI gene (formerly Entrezgene);Acc:818589]
AT2G40150	TBL28	TBL28	NCBI gene (formerly Entrezgene)	TRICHOME BIREFRINGENCE-LIKE 28 [Source:NCBI gene (formerly Entrezgene);Acc:818606]
AT2G40480	NA	AT2G40480	NCBI gene (formerly Entrezgene)	WEB family protein (DUF827) [Source:NCBI gene (formerly Entrezgene);Acc:818643]
AT2G40490	HEME2	HEME2	NCBI gene (formerly Entrezgene)	Uroporphyrinogen decarboxylase [Source:NCBI gene (formerly Entrezgene);Acc:818644]
AT2G40540	KT2	KT2	NCBI gene (formerly Entrezgene)	potassium transporter 2 [Source:NCBI gene (formerly Entrezgene);Acc:818649]
AT2G41170	NA	AT2G41170	NCBI gene (formerly Entrezgene)	F-box family protein [Source:NCBI gene (formerly Entrezgene);Acc:818716]
AT2G42170	NA	AT2G42170	NCBI gene (formerly Entrezgene)	Actin family protein [Source:NCBI gene (formerly Entrezgene);Acc:818817]
AT2G42210	ATOEP16-3	OEP16-3	NCBI gene (formerly Entrezgene)	Mitochondrial import inner membrane translocase subunit Tim17/Tim22/Tim23 family protein [Source:NCBI gene (formerly Entrezgene);Acc:818821]
AT2G42220	NA	AT2G42220	NCBI gene (formerly Entrezgene)	Rhodanese/Cell cycle control phosphatase superfamily protein [Source:NCBI gene (formerly Entrezgene);Acc:818822]
AT2G42250	CYP712A1	CYP712A1	NCBI gene (formerly Entrezgene)	cytochrome P450, family 712, subfamily A, polypeptide 1 [Source:NCBI gene (formerly Entrezgene);Acc:818826]
AT2G42380	ATBZIP34	BZIP34	NCBI gene (formerly Entrezgene)	Basic-leucine zipper (bZIP) transcription factor family protein [Source:NCBI gene (formerly Entrezgene);Acc:818839]
AT2G42570	TBL39	TBL39	NCBI gene (formerly Entrezgene)	TRICHOME BIREFRINGENCE-LIKE 39 [Source:NCBI gene (formerly Entrezgene);Acc:818857]
AT2G42870	PAR1	PAR1	NCBI gene (formerly Entrezgene)	phy rapidly regulated 1 [Source:NCBI gene (formerly Entrezgene);Acc:818887]
AT2G43030	NA	AT2G43030	NCBI gene (formerly Entrezgene)	Ribosomal protein L3 family protein [Source:NCBI gene (formerly Entrezgene);Acc:818905]
AT2G43560	NA	AT2G43560	NCBI gene (formerly Entrezgene)	FKBP-like peptidyl-prolyl cis-trans isomerase family protein [Source:NCBI gene (formerly Entrezgene);Acc:818958]
AT2G43750	OASB	OASB	NCBI gene (formerly Entrezgene)	O-acetylserine (thiol) lyase B [Source:NCBI gene (formerly Entrezgene);Acc:818978]
AT2G43900	NA	5PTase12	NCBI gene (formerly Entrezgene)	Endonuclease/exonuclease/phosphatase family protein [Source:NCBI gene (formerly Entrezgene);Acc:818994]
AT2G44040	NA	AT2G44040	NCBI gene (formerly Entrezgene)	Dihydrodipicolinate reductase, bacterial/plant [Source:NCBI gene (formerly Entrezgene);Acc:819009]
AT2G44640	NA	AT2G44640	NCBI gene (formerly Entrezgene)	TRIGALACTOSYLDIACYLGLYCEROL-like protein [Source:NCBI gene (formerly Entrezgene);Acc:819072]
AT2G44650	CHL-CPN10	CHL-CPN10	NCBI gene (formerly Entrezgene)	chloroplast chaperonin 10 [Source:NCBI gene (formerly Entrezgene);Acc:819073]
AT2G44740	CYCP4;1	CYCP4;1	NCBI gene (formerly Entrezgene)	cyclin p4;1 [Source:NCBI gene (formerly Entrezgene);Acc:819082]
AT2G45270	GCP1	GCP1	NCBI gene (formerly Entrezgene)	glycoprotease 1 [Source:NCBI gene (formerly Entrezgene);Acc:819135]
AT2G45470	FLA8	FLA8	NCBI gene (formerly Entrezgene)	FASCICLIN-like arabinogalactan protein 8 [Source:NCBI gene (formerly Entrezgene);Acc:819155]
AT2G45770	CPFTSY	CPFTSY	NCBI gene (formerly Entrezgene)	signal recognition particle receptor protein, chloroplast (FTSY) [Source:NCBI gene (formerly Entrezgene);Acc:819185]
AT2G45970	CYP86A8	CYP86A8	NCBI gene (formerly Entrezgene)	cytochrome P450, family 86, subfamily A, polypeptide 8 [Source:NCBI gene (formerly Entrezgene);Acc:819205]
AT2G46780	NA	AT2G46780	NCBI gene (formerly Entrezgene)	RNA-binding (RRM/RBD/RNP motifs) family protein [Source:NCBI gene (formerly Entrezgene);Acc:819291]
AT2G46810	NA	AT2G46810	NCBI gene (formerly Entrezgene)	basic helix-loop-helix (bHLH) DNA-binding superfamily protein [Source:NCBI gene (formerly Entrezgene);Acc:819294]
AT2G47450	CAO	CAO	NCBI gene (formerly Entrezgene)	chloroplast signal recognition particle component (CAO) [Source:NCBI gene (formerly Entrezgene);Acc:819358]
AT2G47630	NA	AT2G47630	NCBI gene (formerly Entrezgene)	alpha/beta-Hydrolases superfamily protein [Source:NCBI gene (formerly Entrezgene);Acc:819376]
AT2G47940	DEGP2	DEG2	NCBI gene (formerly Entrezgene)	DEGP protease 2 [Source:NCBI gene (formerly Entrezgene);Acc:819406]
AT2G48070	RPH1	RPH1	NCBI gene (formerly Entrezgene)	resistance to phytophthora 1 [Source:NCBI gene (formerly Entrezgene);Acc:819419]
AT3G01370	ATCFM2	CFM2	NCBI gene (formerly Entrezgene)	CRM family member 2 [Source:NCBI gene (formerly Entrezgene);Acc:821288]
AT3G01480	CYP38	CYP38	NCBI gene (formerly Entrezgene)	cyclophilin 38 [Source:NCBI gene (formerly Entrezgene);Acc:821137]
AT3G02080	NA	AT3G02080	NCBI gene (formerly Entrezgene)	Ribosomal protein S19e family protein [Source:NCBI gene (formerly Entrezgene);Acc:821120]
AT3G02110	scpl25	scpl25	NCBI gene (formerly Entrezgene)	serine carboxypeptidase-like 25 [Source:NCBI gene (formerly Entrezgene);Acc:821207]
AT3G02540	RAD23C;RAD23-3	RAD23C	NCBI gene (formerly Entrezgene)	Rad23 UV excision repair protein family [Source:NCBI gene (formerly Entrezgene);Acc:821195]
AT3G02660	emb2768	EMB2768	NCBI gene (formerly Entrezgene)	Tyrosyl-tRNA synthetase, class Ib, bacterial/mitochondrial [Source:NCBI gene (formerly Entrezgene);Acc:821282]
AT3G02870	VTC4	VTC4	NCBI gene (formerly Entrezgene)	Inositol monophosphatase family protein [Source:NCBI gene (formerly Entrezgene);Acc:821206]
AT3G03820	NA	SAUR29	NCBI gene (formerly Entrezgene)	SAUR-like auxin-responsive protein family [Source:NCBI gene (formerly Entrezgene);Acc:28718697]
AT3G03980	NA	AT3G03980	NCBI gene (formerly Entrezgene)	NAD(P)-binding Rossmann-fold superfamily protein [Source:NCBI gene (formerly Entrezgene);Acc:819553]
AT3G04790	NA	EMB3119	NCBI gene (formerly Entrezgene)	Ribose 5-phosphate isomerase, type A protein [Source:NCBI gene (formerly Entrezgene);Acc:819639]
AT3G04810	ATNEK2	NEK2	NCBI gene (formerly Entrezgene)	NIMA-related kinase 2 [Source:NCBI gene (formerly Entrezgene);Acc:819641]
AT3G05000	NA	AT3G05000	NCBI gene (formerly Entrezgene)	Transport protein particle (TRAPP) component [Source:NCBI gene (formerly Entrezgene);Acc:819661]
AT3G05625	NA	AT3G05625	NCBI gene (formerly Entrezgene)	Tetratricopeptide repeat (TPR)-like superfamily protein [Source:NCBI gene (formerly Entrezgene);Acc:819729]
AT3G05910	NA	AT3G05910	NCBI gene (formerly Entrezgene)	Pectinacetylesterase family protein [Source:NCBI gene (formerly Entrezgene);Acc:819760]
AT3G06140	NA	LUL4	NCBI gene (formerly Entrezgene)	RING/U-box superfamily protein [Source:NCBI gene (formerly Entrezgene);Acc:819787]
AT3G06370	NHX4	NHX4	NCBI gene (formerly Entrezgene)	sodium hydrogen exchanger 4 [Source:NCBI gene (formerly Entrezgene);Acc:819811]
AT3G06640	NA	AT3G06640	NCBI gene (formerly Entrezgene)	PAS domain-containing protein tyrosine kinase family protein [Source:NCBI gene (formerly Entrezgene);Acc:819844]
AT3G06770	NA	AT3G06770	NCBI gene (formerly Entrezgene)	Pectin lyase-like superfamily protein [Source:NCBI gene (formerly Entrezgene);Acc:819862]
AT3G06880	NA	AT3G06880	NCBI gene (formerly Entrezgene)	Transducin/WD40 repeat-like superfamily protein [Source:NCBI gene (formerly Entrezgene);Acc:819873]
AT3G07210	NA	AT3G07210	NCBI gene (formerly Entrezgene)	NA
AT3G07540	NA	AT3G07540	NCBI gene (formerly Entrezgene)	Actin-binding FH2 (formin homology 2) family protein [Source:NCBI gene (formerly Entrezgene);Acc:819943]
AT3G07568	NA	AT3G07568	NCBI gene (formerly Entrezgene)	fanconi anemia group D2 protein [Source:NCBI gene (formerly Entrezgene);Acc:819947]
AT3G08600	NA	AT3G08600	NCBI gene (formerly Entrezgene)	transmembrane protein, putative (DUF1191) [Source:NCBI gene (formerly Entrezgene);Acc:820007]
AT3G08680	NA	AT3G08680	NCBI gene (formerly Entrezgene)	Leucine-rich repeat protein kinase family protein [Source:NCBI gene (formerly Entrezgene);Acc:820015]
AT3G08740	NA	AT3G08740	NCBI gene (formerly Entrezgene)	elongation factor P (EF-P) family protein [Source:NCBI gene (formerly Entrezgene);Acc:820021]
AT3G08920	NA	AT3G08920	NCBI gene (formerly Entrezgene)	Rhodanese/Cell cycle control phosphatase superfamily protein [Source:NCBI gene (formerly Entrezgene);Acc:820041]
AT3G08940	LHCB4.2	LHCB4.2	NCBI gene (formerly Entrezgene)	light harvesting complex photosystem II [Source:NCBI gene (formerly Entrezgene);Acc:820043]
AT3G09210	PTAC13	PTAC13	NCBI gene (formerly Entrezgene)	plastid transcriptionally active 13 [Source:NCBI gene (formerly Entrezgene);Acc:820077]
AT3G09800	NA	AT3G09800	NCBI gene (formerly Entrezgene)	SNARE-like superfamily protein [Source:NCBI gene (formerly Entrezgene);Acc:820138]
AT3G09860	NA	AT3G09860	NCBI gene (formerly Entrezgene)	actin T1-like protein [Source:NCBI gene (formerly Entrezgene);Acc:820144]
AT3G10080	NA	AT3G10080	NCBI gene (formerly Entrezgene)	RmlC-like cupins superfamily protein [Source:NCBI gene (formerly Entrezgene);Acc:820169]
AT3G10700	GalAK	GalAK	NCBI gene (formerly Entrezgene)	galacturonic acid kinase [Source:NCBI gene (formerly Entrezgene);Acc:820239]
AT3G11630	NA	AT3G11630	NCBI gene (formerly Entrezgene)	Thioredoxin superfamily protein [Source:NCBI gene (formerly Entrezgene);Acc:820335]
AT3G11760	NA	AT3G11760	NCBI gene (formerly Entrezgene)	structural maintenance of chromosomes flexible hinge domain protein [Source:NCBI gene (formerly Entrezgene);Acc:820349]
AT3G12110	ACT11	ACT11	NCBI gene (formerly Entrezgene)	actin-11 [Source:NCBI gene (formerly Entrezgene);Acc:820385]
AT3G12345	NA	AT3G12345	NCBI gene (formerly Entrezgene)	FKBP-type peptidyl-prolyl cis-trans isomerase [Source:NCBI gene (formerly Entrezgene);Acc:3768848]
AT3G12915	NA	AT3G12915	NCBI gene (formerly Entrezgene)	Ribosomal protein S5/Elongation factor G/III/V family protein [Source:NCBI gene (formerly Entrezgene);Acc:3768815]
AT3G12930	NA	AT3G12930	NCBI gene (formerly Entrezgene)	Lojap-related protein [Source:NCBI gene (formerly Entrezgene);Acc:820478]
AT3G13000	NA	AT3G13000	NCBI gene (formerly Entrezgene)	ubiquinone biosynthesis protein (Protein of unknown function, DUF547) [Source:NCBI gene (formerly Entrezgene);Acc:820486]
AT3G13120	NA	AT3G13120	NCBI gene (formerly Entrezgene)	Ribosomal protein S10p/S20e family protein [Source:NCBI gene (formerly Entrezgene);Acc:820500]
AT3G13360	WIP3	WIP3	NCBI gene (formerly Entrezgene)	WPP domain interacting protein 3 [Source:NCBI gene (formerly Entrezgene);Acc:820536]
AT3G13700	NA	AT3G13700	NCBI gene (formerly Entrezgene)	RNA-binding (RRM/RBD/RNP motifs) family protein [Source:NCBI gene (formerly Entrezgene);Acc:820579]
AT3G14110	FLU	FLU	NCBI gene (formerly Entrezgene)	Tetratricopeptide repeat (TPR)-like superfamily protein [Source:NCBI gene (formerly Entrezgene);Acc:820628]
AT3G14240	NA	AT3G14240	NCBI gene (formerly Entrezgene)	Subtilase family protein [Source:NCBI gene (formerly Entrezgene);Acc:820644]
AT3G14290	PAE2	PAE2	NCBI gene (formerly Entrezgene)	20S proteasome alpha subunit E2 [Source:NCBI gene (formerly Entrezgene);Acc:820649]
AT3G14760	NA	AT3G14760	NCBI gene (formerly Entrezgene)	transmembrane protein [Source:NCBI gene (formerly Entrezgene);Acc:820704]
AT3G14930	HEME1	HEME1	NCBI gene (formerly Entrezgene)	Uroporphyrinogen decarboxylase [Source:NCBI gene (formerly Entrezgene);Acc:820722]
AT3G15190	NA	PRPS20	NCBI gene (formerly Entrezgene)	chloroplast 30S ribosomal protein S20 [Source:NCBI gene (formerly Entrezgene);Acc:820750]
AT3G15520	NA	AT3G15520	NCBI gene (formerly Entrezgene)	Cyclophilin-like peptidyl-prolyl cis-trans isomerase family protein [Source:NCBI gene (formerly Entrezgene);Acc:820791]
AT3G15620	UVR3	UVR3	NCBI gene (formerly Entrezgene)	DNA photolyase family protein [Source:NCBI gene (formerly Entrezgene);Acc:820804]
AT3G15680	NA	AT3G15680	NCBI gene (formerly Entrezgene)	Ran BP2/NZF zinc finger-like superfamily protein [Source:NCBI gene (formerly Entrezgene);Acc:820811]
AT3G16000	MFP1	MFP1	NCBI gene (formerly Entrezgene)	MAR binding filament-like protein 1 [Source:NCBI gene (formerly Entrezgene);Acc:820845]
AT3G16060	NA	AT3G16060	NCBI gene (formerly Entrezgene)	ATP binding microtubule motor family protein [Source:NCBI gene (formerly Entrezgene);Acc:820851]
AT3G16240	DELTA-TIP	DELTA-TIP	NCBI gene (formerly Entrezgene)	delta tonoplast integral protein [Source:NCBI gene (formerly Entrezgene);Acc:820870]
AT3G16370	NA	AT3G16370	NCBI gene (formerly Entrezgene)	GDSL-like Lipase/Acylhydrolase superfamily protein [Source:NCBI gene (formerly Entrezgene);Acc:820884]
AT3G17090	NA	AT3G17090	NCBI gene (formerly Entrezgene)	Protein phosphatase 2C family protein [Source:NCBI gene (formerly Entrezgene);Acc:820966]
AT3G18390	EMB1865	EMB1865	NCBI gene (formerly Entrezgene)	CRS1 / YhbY (CRM) domain-containing protein [Source:NCBI gene (formerly Entrezgene);Acc:821368]
AT3G18890	NA	Tic62	NCBI gene (formerly Entrezgene)	NAD(P)-binding Rossmann-fold superfamily protein [Source:NCBI gene (formerly Entrezgene);Acc:821422]
AT3G18940	NA	AT3G18940	NCBI gene (formerly Entrezgene)	clast3-like protein [Source:NCBI gene (formerly Entrezgene);Acc:821426]
AT3G18960	NA	AT3G18960	NCBI gene (formerly Entrezgene)	AP2/B3-like transcriptional factor family protein [Source:NCBI gene (formerly Entrezgene);Acc:821429]
AT3G19180	ARC6H	PARC6	NCBI gene (formerly Entrezgene)	plastid division protein [Source:NCBI gene (formerly Entrezgene);Acc:821452]
AT3G19570	SCO3	SCO3	NCBI gene (formerly Entrezgene)	SNOWY COTYLEDON protein (DUF566) [Source:NCBI gene (formerly Entrezgene);Acc:821494]
AT3G19820	DWF1	DWF1	NCBI gene (formerly Entrezgene)	cell elongation protein / DWARF1 / DIMINUTO (DIM) [Source:NCBI gene (formerly Entrezgene);Acc:821519]
AT3G20350	NA	AT3G20350	NCBI gene (formerly Entrezgene)	actin cytoskeleton-regulatory complex pan-like protein [Source:NCBI gene (formerly Entrezgene);Acc:821579]
AT3G20680	NA	AT3G20680	NCBI gene (formerly Entrezgene)	plant/protein (DUF1995) [Source:NCBI gene (formerly Entrezgene);Acc:821615]
AT3G20790	NA	AT3G20790	NCBI gene (formerly Entrezgene)	NAD(P)-binding Rossmann-fold superfamily protein [Source:NCBI gene (formerly Entrezgene);Acc:821627]
AT3G21055	PSBTN	PSBTN	NCBI gene (formerly Entrezgene)	photosystem II subunit T [Source:NCBI gene (formerly Entrezgene);Acc:821657]
AT3G21870	CYCP2;1	CYCP2;1	NCBI gene (formerly Entrezgene)	cyclin p2;1 [Source:NCBI gene (formerly Entrezgene);Acc:821742]
AT3G22110	PAC1	PAC1	NCBI gene (formerly Entrezgene)	20S proteasome alpha subunit C1 [Source:NCBI gene (formerly Entrezgene);Acc:821774]
AT3G22120	CWLP	CWLP	NCBI gene (formerly Entrezgene)	cell wall-plasma membrane linker protein [Source:NCBI gene (formerly Entrezgene);Acc:821775]
AT3G23210	bHLH34	bHLH34	NCBI gene (formerly Entrezgene)	basic helix-loop-helix (bHLH) DNA-binding superfamily protein [Source:NCBI gene (formerly Entrezgene);Acc:821899]
AT3G23450	NA	AT3G23450	NCBI gene (formerly Entrezgene)	transmembrane protein [Source:NCBI gene (formerly Entrezgene);Acc:3768908]
AT3G23530	NA	AT3G23530	NCBI gene (formerly Entrezgene)	Cyclopropane-fatty-acyl-phospholipid synthase [Source:NCBI gene (formerly Entrezgene);Acc:821932]
AT3G23690	NA	AT3G23690	NCBI gene (formerly Entrezgene)	basic helix-loop-helix (bHLH) DNA-binding superfamily protein [Source:NCBI gene (formerly Entrezgene);Acc:821950]
AT3G23730	XTH16	XTH16	NCBI gene (formerly Entrezgene)	xyloglucan endotransglucosylase/hydrolase 16 [Source:NCBI gene (formerly Entrezgene);Acc:821955]
AT3G23760	NA	AT3G23760	NCBI gene (formerly Entrezgene)	transferring glycosyl group transferase [Source:NCBI gene (formerly Entrezgene);Acc:821958]
AT3G23880	NA	AT3G23880	NCBI gene (formerly Entrezgene)	F-box and associated interaction domains-containing protein [Source:NCBI gene (formerly Entrezgene);Acc:821971]
AT3G24430	HCF101	HCF101	NCBI gene (formerly Entrezgene)	ATP binding protein [Source:NCBI gene (formerly Entrezgene);Acc:822033]
AT3G24570	NA	AT3G24570	NCBI gene (formerly Entrezgene)	Peroxisomal membrane 22 kDa (Mpv17/PMP22) family protein [Source:NCBI gene (formerly Entrezgene);Acc:822053]
AT3G25480	NA	AT3G25480	NCBI gene (formerly Entrezgene)	Rhodanese/Cell cycle control phosphatase superfamily protein [Source:NCBI gene (formerly Entrezgene);Acc:822132]
AT3G25590	NA	AT3G25590	NCBI gene (formerly Entrezgene)	micronuclear linker histone polyprotein-like protein [Source:NCBI gene (formerly Entrezgene);Acc:822146]
AT3G25660	NA	AT3G25660	NCBI gene (formerly Entrezgene)	Amidase family protein [Source:NCBI gene (formerly Entrezgene);Acc:822154]
AT3G25805	NA	AT3G25805	NCBI gene (formerly Entrezgene)	transmembrane protein [Source:NCBI gene (formerly Entrezgene);Acc:822172]
AT3G25920	RPL15	RPL15	NCBI gene (formerly Entrezgene)	ribosomal protein L15 [Source:NCBI gene (formerly Entrezgene);Acc:822189]
AT3G26060	ATPRX Q	PRXQ	NCBI gene (formerly Entrezgene)	Thioredoxin superfamily protein [Source:NCBI gene (formerly Entrezgene);Acc:822203]
AT3G26570	PHT2;1	PHT2;1	NCBI gene (formerly Entrezgene)	phosphate transporter 2;1 [Source:NCBI gene (formerly Entrezgene);Acc:822265]
AT3G26710	CCB1	CCB1	NCBI gene (formerly Entrezgene)	cofactor assembly of complex C [Source:NCBI gene (formerly Entrezgene);Acc:822283]
AT3G26720	NA	AT3G26720	NCBI gene (formerly Entrezgene)	Glycosyl hydrolase family 38 protein [Source:NCBI gene (formerly Entrezgene);Acc:822284]
AT3G26900	SKL1	SKL1	NCBI gene (formerly Entrezgene)	shikimate kinase like 1 [Source:NCBI gene (formerly Entrezgene);Acc:822306]
AT3G26950	NA	AT3G26950	NCBI gene (formerly Entrezgene)	transmembrane protein [Source:NCBI gene (formerly Entrezgene);Acc:822313]
AT3G27160	GHS1	GHS1	NCBI gene (formerly Entrezgene)	Ribosomal protein S21 family protein [Source:NCBI gene (formerly Entrezgene);Acc:822335]
AT3G27690	LHCB2.4	LHCB2.3	NCBI gene (formerly Entrezgene)	photosystem II light harvesting complex protein 2.3 [Source:NCBI gene (formerly Entrezgene);Acc:822391]
AT3G27830	RPL12-A	RPL12-A	NCBI gene (formerly Entrezgene)	ribosomal protein L12-A [Source:NCBI gene (formerly Entrezgene);Acc:822403]
AT3G28460	NA	AT3G28460	NCBI gene (formerly Entrezgene)	methyltransferase [Source:NCBI gene (formerly Entrezgene);Acc:822476]
AT3G28760	NA	AT3G28760	NCBI gene (formerly Entrezgene)	3-dehydroquinate synthase [Source:NCBI gene (formerly Entrezgene);Acc:822508]
AT3G29185	NA	AT3G29185	NCBI gene (formerly Entrezgene)	glutamate NMDA receptor subunit epsilon-1, putative (DUF3598) [Source:NCBI gene (formerly Entrezgene);Acc:822570]
AT3G29280	NA	AT3G29280	NCBI gene (formerly Entrezgene)	NA
AT3G29631	NA	AT3G29631	NCBI gene (formerly Entrezgene)	nuclease [Source:NCBI gene (formerly Entrezgene);Acc:28719339]
AT3G43190	SUS4	SUS4	NCBI gene (formerly Entrezgene)	sucrose synthase 4 [Source:NCBI gene (formerly Entrezgene);Acc:823393]
AT3G43610	NA	AT3G43610	NCBI gene (formerly Entrezgene)	Spc97 / Spc98 family of spindle pole body (SBP) component [Source:NCBI gene (formerly Entrezgene);Acc:823458]
AT3G44890	RPL9	RPL9	NCBI gene (formerly Entrezgene)	ribosomal protein L9 [Source:NCBI gene (formerly Entrezgene);Acc:823623]
AT3G45850	NA	AT3G45850	NCBI gene (formerly Entrezgene)	P-loop containing nucleoside triphosphate hydrolases superfamily protein [Source:NCBI gene (formerly Entrezgene);Acc:823728]
AT3G45980	H2B	HTB9	NCBI gene (formerly Entrezgene)	Histone superfamily protein [Source:NCBI gene (formerly Entrezgene);Acc:823741]
AT3G46200	aTNUDT9	NUDT9	NCBI gene (formerly Entrezgene)	nudix hydrolase homolog 9 [Source:NCBI gene (formerly Entrezgene);Acc:823765]
AT3G47650	NA	AT3G47650	NCBI gene (formerly Entrezgene)	DnaJ/Hsp40 cysteine-rich domain superfamily protein [Source:NCBI gene (formerly Entrezgene);Acc:823919]
AT3G47860	CHL	CHL	NCBI gene (formerly Entrezgene)	chloroplastic lipocalin [Source:NCBI gene (formerly Entrezgene);Acc:823942]
AT3G48110	EDD1	EDD1	NCBI gene (formerly Entrezgene)	glycine-tRNA ligase [Source:NCBI gene (formerly Entrezgene);Acc:823966]
AT3G48187	NA	AT3G48187	NCBI gene (formerly Entrezgene)	Serine/Threonine-kinase ATM [Source:NCBI gene (formerly Entrezgene);Acc:28719387]
AT3G48730	GSA2	GSA2	NCBI gene (formerly Entrezgene)	glutamate-1-semialdehyde 2,1-aminomutase 2 [Source:NCBI gene (formerly Entrezgene);Acc:824034]
AT3G49140	NA	AT3G49140	NCBI gene (formerly Entrezgene)	Pentatricopeptide repeat (PPR) superfamily protein [Source:NCBI gene (formerly Entrezgene);Acc:824075]
AT3G49250	DMS3	DMS3	NCBI gene (formerly Entrezgene)	defective in meristem silencing 3 [Source:NCBI gene (formerly Entrezgene);Acc:824086]
AT3G49260	iqd21	iqd21	NCBI gene (formerly Entrezgene)	IQ-domain 21 [Source:NCBI gene (formerly Entrezgene);Acc:824087]
AT3G49470	NACA2	NACA2	NCBI gene (formerly Entrezgene)	nascent polypeptide-associated complex subunit alpha-like protein 2 [Source:NCBI gene (formerly Entrezgene);Acc:824109]
AT3G49650	NA	AT3G49650	NCBI gene (formerly Entrezgene)	P-loop containing nucleoside triphosphate hydrolases superfamily protein [Source:NCBI gene (formerly Entrezgene);Acc:824127]
AT3G49670	BAM2	BAM2	NCBI gene (formerly Entrezgene)	Leucine-rich receptor-like protein kinase family protein [Source:NCBI gene (formerly Entrezgene);Acc:824129]
AT3G49680	ATBCAT-3	BCAT3	NCBI gene (formerly Entrezgene)	branched-chain aminotransferase 3 [Source:NCBI gene (formerly Entrezgene);Acc:824130]
AT3G50240	KICP-02	KICP-02	NCBI gene (formerly Entrezgene)	ATP binding microtubule motor family protein [Source:NCBI gene (formerly Entrezgene);Acc:824186]
AT3G50685	NA	AT3G50685	NCBI gene (formerly Entrezgene)	anti-muellerian hormone type-2 receptor [Source:NCBI gene (formerly Entrezgene);Acc:824232]
AT3G51080	GATA6	GATA6	NCBI gene (formerly Entrezgene)	GATA transcription factor 6 [Source:NCBI gene (formerly Entrezgene);Acc:824272]
AT3G51150	NA	AT3G51150	NCBI gene (formerly Entrezgene)	ATP binding microtubule motor family protein [Source:NCBI gene (formerly Entrezgene);Acc:824279]
AT3G51230	NA	AT3G51230	NCBI gene (formerly Entrezgene)	chalcone-flavanone isomerase family protein [Source:NCBI gene (formerly Entrezgene);Acc:824286]
AT3G51470	NA	AT3G51470	NCBI gene (formerly Entrezgene)	Protein phosphatase 2C family protein [Source:NCBI gene (formerly Entrezgene);Acc:824310]
AT3G51820	ATG4	G4	NCBI gene (formerly Entrezgene)	UbiA prenyltransferase family protein [Source:NCBI gene (formerly Entrezgene);Acc:824345]
AT3G52150	NA	PSRP2	NCBI gene (formerly Entrezgene)	RNA-binding (RRM/RBD/RNP motifs) family protein [Source:NCBI gene (formerly Entrezgene);Acc:824379]
AT3G52750	FTSZ2-2	FTSZ2-2	NCBI gene (formerly Entrezgene)	Tubulin/FtsZ family protein [Source:NCBI gene (formerly Entrezgene);Acc:824441]
AT3G52840	BGAL2	BGAL2	NCBI gene (formerly Entrezgene)	beta-galactosidase 2 [Source:NCBI gene (formerly Entrezgene);Acc:824450]
AT3G52890	KIPK	KIPK	NCBI gene (formerly Entrezgene)	KCBP-interacting protein kinase [Source:NCBI gene (formerly Entrezgene);Acc:824455]
AT3G52900	NA	AT3G52900	NCBI gene (formerly Entrezgene)	RAB6-interacting golgin (DUF662) [Source:NCBI gene (formerly Entrezgene);Acc:824456]
AT3G52960	NA	AT3G52960	NCBI gene (formerly Entrezgene)	Thioredoxin superfamily protein [Source:NCBI gene (formerly Entrezgene);Acc:824462]
AT3G53130	LUT1	LUT1	NCBI gene (formerly Entrezgene)	Cytochrome P450 superfamily protein [Source:NCBI gene (formerly Entrezgene);Acc:824479]
AT3G53190	NA	AT3G53190	NCBI gene (formerly Entrezgene)	Pectin lyase-like superfamily protein [Source:NCBI gene (formerly Entrezgene);Acc:824485]
AT3G53470	NA	AT3G53470	NCBI gene (formerly Entrezgene)	2,3-bisphosphoglycerate-independent phosphoglycerate mutase [Source:NCBI gene (formerly Entrezgene);Acc:824515]
AT3G53580	NA	AT3G53580	NCBI gene (formerly Entrezgene)	diaminopimelate epimerase family protein [Source:NCBI gene (formerly Entrezgene);Acc:824526]
AT3G53850	NA	AT3G53850	NCBI gene (formerly Entrezgene)	Uncharacterized protein family (UPF0497) [Source:NCBI gene (formerly Entrezgene);Acc:824552]
AT3G53900	UPP	UPP	NCBI gene (formerly Entrezgene)	uracil phosphoribosyltransferase [Source:NCBI gene (formerly Entrezgene);Acc:824557]
AT3G54050	HCEF1	HCEF1	NCBI gene (formerly Entrezgene)	high cyclic electron flow 1 [Source:NCBI gene (formerly Entrezgene);Acc:824572]
AT3G54210	NA	AT3G54210	NCBI gene (formerly Entrezgene)	Ribosomal protein L17 family protein [Source:NCBI gene (formerly Entrezgene);Acc:824588]
AT3G54650	FBL17	FBL17	NCBI gene (formerly Entrezgene)	RNI-like superfamily protein [Source:NCBI gene (formerly Entrezgene);Acc:824630]
AT3G54920	PMR6	PMR6	NCBI gene (formerly Entrezgene)	Pectin lyase-like superfamily protein [Source:NCBI gene (formerly Entrezgene);Acc:824657]
AT3G55250	NA	PDE329	NCBI gene (formerly Entrezgene)	calcium homeostasis regulator [Source:NCBI gene (formerly Entrezgene);Acc:824691]
AT3G55800	SBPASE	SBPASE	NCBI gene (formerly Entrezgene)	sedoheptulose-bisphosphatase [Source:NCBI gene (formerly Entrezgene);Acc:824746]
AT3G56040	UGP3	UGP3	NCBI gene (formerly Entrezgene)	UDP-glucose pyrophosphorylase 3 [Source:NCBI gene (formerly Entrezgene);Acc:824770]
AT3G56130	NA	AT3G56130	NCBI gene (formerly Entrezgene)	biotin/lipoyl attachment domain-containing protein [Source:NCBI gene (formerly Entrezgene);Acc:824779]
AT3G56910	PSRP5	PSRP5	NCBI gene (formerly Entrezgene)	plastid-specific 50S ribosomal protein 5 [Source:NCBI gene (formerly Entrezgene);Acc:824858]
AT3G56940	CRD1	CRD1	NCBI gene (formerly Entrezgene)	dicarboxylate diiron protein, putative (Crd1) [Source:NCBI gene (formerly Entrezgene);Acc:824861]
AT3G57030	NA	AT3G57030	NCBI gene (formerly Entrezgene)	Calcium-dependent phosphotriesterase superfamily protein [Source:NCBI gene (formerly Entrezgene);Acc:824870]
AT3G57050	CBL	CBL	NCBI gene (formerly Entrezgene)	cystathionine beta-lyase [Source:NCBI gene (formerly Entrezgene);Acc:824872]
AT3G57560	NAGK	NAGK	NCBI gene (formerly Entrezgene)	N-acetyl-l-glutamate kinase [Source:NCBI gene (formerly Entrezgene);Acc:824923]
AT3G58120	ATBZIP61	BZIP61	NCBI gene (formerly Entrezgene)	Basic-leucine zipper (bZIP) transcription factor family protein [Source:NCBI gene (formerly Entrezgene);Acc:824981]
AT3G58140	NA	AT3G58140	NCBI gene (formerly Entrezgene)	phenylalanyl-tRNA synthetase class IIc family protein [Source:NCBI gene (formerly Entrezgene);Acc:824983]
AT3G59780	NA	AT3G59780	NCBI gene (formerly Entrezgene)	Rhodanese/Cell cycle control phosphatase superfamily protein [Source:NCBI gene (formerly Entrezgene);Acc:825147]
AT3G59970	MTHFR1	MTHFR1	NCBI gene (formerly Entrezgene)	methylenetetrahydrofolate reductase 1 [Source:NCBI gene (formerly Entrezgene);Acc:825167]
AT3G60210	NA	AT3G60210	NCBI gene (formerly Entrezgene)	GroES-like family protein [Source:NCBI gene (formerly Entrezgene);Acc:825191]
AT3G60370	NA	AT3G60370	NCBI gene (formerly Entrezgene)	FKBP-like peptidyl-prolyl cis-trans isomerase family protein [Source:NCBI gene (formerly Entrezgene);Acc:825208]
AT3G61870	NA	AT3G61870	NCBI gene (formerly Entrezgene)	plant/protein [Source:NCBI gene (formerly Entrezgene);Acc:825360]
AT3G62030	ROC4	ROC4	NCBI gene (formerly Entrezgene)	rotamase CYP 4 [Source:NCBI gene (formerly Entrezgene);Acc:825376]
AT3G62120	NA	AT3G62120	NCBI gene (formerly Entrezgene)	Class II aaRS and biotin synthetases superfamily protein [Source:NCBI gene (formerly Entrezgene);Acc:825385]
AT3G62390	TBL6	TBL6	NCBI gene (formerly Entrezgene)	TRICHOME BIREFRINGENCE-LIKE 6 [Source:NCBI gene (formerly Entrezgene);Acc:825412]
AT3G62530	NA	AT3G62530	NCBI gene (formerly Entrezgene)	ARM repeat superfamily protein [Source:NCBI gene (formerly Entrezgene);Acc:825427]
AT3G62910	APG3	APG3	NCBI gene (formerly Entrezgene)	Peptide chain release factor 1 [Source:NCBI gene (formerly Entrezgene);Acc:825466]
AT3G63200	PLP9	PLP9	NCBI gene (formerly Entrezgene)	PATATIN-like protein 9 [Source:NCBI gene (formerly Entrezgene);Acc:825495]
AT3G63410	APG1	APG1	NCBI gene (formerly Entrezgene)	S-adenosyl-L-methionine-dependent methyltransferases superfamily protein [Source:NCBI gene (formerly Entrezgene);Acc:825516]
AT3G63490	NA	EMB3126	NCBI gene (formerly Entrezgene)	Ribosomal protein L1p/L10e family [Source:NCBI gene (formerly Entrezgene);Acc:825524]
AT3G63510	NA	AT3G63510	NCBI gene (formerly Entrezgene)	FMN-linked oxidoreductases superfamily protein [Source:NCBI gene (formerly Entrezgene);Acc:825526]
AT4G00400	GPAT8	GPAT8	NCBI gene (formerly Entrezgene)	glycerol-3-phosphate acyltransferase 8 [Source:NCBI gene (formerly Entrezgene);Acc:828140]
AT4G00810	NA	AT4G00810	NCBI gene (formerly Entrezgene)	60S acidic ribosomal protein family [Source:NCBI gene (formerly Entrezgene);Acc:828004]
AT4G01040	NA	AT4G01040	NCBI gene (formerly Entrezgene)	Glycosyl hydrolase superfamily protein [Source:NCBI gene (formerly Entrezgene);Acc:827924]
AT4G01050	TROL	TROL	NCBI gene (formerly Entrezgene)	thylakoid rhodanese-like protein [Source:NCBI gene (formerly Entrezgene);Acc:827921]
AT4G01150	NA	AT4G01150	NCBI gene (formerly Entrezgene)	CURVATURE THYLAKOID 1A-like protein [Source:NCBI gene (formerly Entrezgene);Acc:828181]
AT4G01310	NA	AT4G01310	NCBI gene (formerly Entrezgene)	Ribosomal L5P family protein [Source:NCBI gene (formerly Entrezgene);Acc:827947]
AT4G01690	PPOX	PPOX	NCBI gene (formerly Entrezgene)	Flavin containing amine oxidoreductase family [Source:NCBI gene (formerly Entrezgene);Acc:827991]
AT4G01800	AGY1	AGY1	NCBI gene (formerly Entrezgene)	Albino or Glassy Yellow 1 [Source:NCBI gene (formerly Entrezgene);Acc:827922]
AT4G01900	PII	GLB1	NCBI gene (formerly Entrezgene)	nitrogen regulatory P-II-like protein [Source:NCBI gene (formerly Entrezgene);Acc:828213]
AT4G02530	NA	AT4G02530	NCBI gene (formerly Entrezgene)	chloroplast thylakoid lumen protein [Source:NCBI gene (formerly Entrezgene);Acc:827927]
AT4G02580	NA	AT4G02580	NCBI gene (formerly Entrezgene)	NADH-ubiquinone oxidoreductase 24 kDa subunit [Source:NCBI gene (formerly Entrezgene);Acc:828130]
AT4G02770	PSAD-1	PSAD-1	NCBI gene (formerly Entrezgene)	photosystem I subunit D-1 [Source:NCBI gene (formerly Entrezgene);Acc:828183]
AT4G02850	NA	AT4G02850	NCBI gene (formerly Entrezgene)	phenazine biosynthesis PhzC/PhzF family protein [Source:NCBI gene (formerly Entrezgene);Acc:828160]
AT4G03270	CYCD6;1	CYCD6;1	NCBI gene (formerly Entrezgene)	Cyclin D6;1 [Source:NCBI gene (formerly Entrezgene);Acc:828000]
AT4G04350	EMB2369	EMB2369	NCBI gene (formerly Entrezgene)	tRNA synthetase class I (I, L, M and V) family protein [Source:NCBI gene (formerly Entrezgene);Acc:825755]
AT4G08685	SAH7	SAH7	NCBI gene (formerly Entrezgene)	Pollen Ole e 1 allergen and extensin family protein [Source:NCBI gene (formerly Entrezgene);Acc:826435]
AT4G09010	APX4	TL29	NCBI gene (formerly Entrezgene)	ascorbate peroxidase 4 [Source:NCBI gene (formerly Entrezgene);Acc:826480]
AT4G09040	NA	AT4G09040	NCBI gene (formerly Entrezgene)	RNA-binding (RRM/RBD/RNP motifs) family protein [Source:NCBI gene (formerly Entrezgene);Acc:826483]
AT4G09650	ATPD	ATPD	NCBI gene (formerly Entrezgene)	F-type H+-transporting ATPase subunit delta [Source:NCBI gene (formerly Entrezgene);Acc:826551]
AT4G10030	NA	AT4G10030	NCBI gene (formerly Entrezgene)	alpha/beta-Hydrolases superfamily protein [Source:NCBI gene (formerly Entrezgene);Acc:826594]
AT4G11100	NA	AT4G11100	NCBI gene (formerly Entrezgene)	gelsolin protein [Source:NCBI gene (formerly Entrezgene);Acc:826711]
AT4G11680	NA	AT4G11680	NCBI gene (formerly Entrezgene)	Zinc finger, C3HC4 type (RING finger) family protein [Source:NCBI gene (formerly Entrezgene);Acc:826773]
AT4G12310	CYP706A5	CYP706A5	NCBI gene (formerly Entrezgene)	cytochrome P450, family 706, subfamily A, polypeptide 5 [Source:NCBI gene (formerly Entrezgene);Acc:826840]
AT4G12970	STOMAGEN	STOMAGEN	NCBI gene (formerly Entrezgene)	stomagen [Source:NCBI gene (formerly Entrezgene);Acc:826909]
AT4G13500	NA	AT4G13500	NCBI gene (formerly Entrezgene)	transmembrane protein [Source:NCBI gene (formerly Entrezgene);Acc:826982]
AT4G13575	NA	AT4G13575	NCBI gene (formerly Entrezgene)	NA
AT4G13670	PTAC5	PTAC5	NCBI gene (formerly Entrezgene)	plastid transcriptionally active 5 [Source:NCBI gene (formerly Entrezgene);Acc:827001]
AT4G13720	NA	AT4G13720	NCBI gene (formerly Entrezgene)	Inosine triphosphate pyrophosphatase family protein [Source:NCBI gene (formerly Entrezgene);Acc:827006]
AT4G14360	NA	AT4G14360	NCBI gene (formerly Entrezgene)	S-adenosyl-L-methionine-dependent methyltransferases superfamily protein [Source:NCBI gene (formerly Entrezgene);Acc:827079]
AT4G14870	SECE1	SECE1	NCBI gene (formerly Entrezgene)	secE/sec61-gamma protein transport protein [Source:NCBI gene (formerly Entrezgene);Acc:827144]
AT4G14960	TUA6	TUA6	NCBI gene (formerly Entrezgene)	Tubulin/FtsZ family protein [Source:NCBI gene (formerly Entrezgene);Acc:827154]
AT4G15510	NA	PPD1	NCBI gene (formerly Entrezgene)	Photosystem II reaction center PsbP family protein [Source:NCBI gene (formerly Entrezgene);Acc:827223]
AT4G15560	CLA1	CLA1	NCBI gene (formerly Entrezgene)	Deoxyxylulose-5-phosphate synthase [Source:NCBI gene (formerly Entrezgene);Acc:827230]
AT4G15802	HSBP	HSBP	NCBI gene (formerly Entrezgene)	heat shock factor binding protein [Source:NCBI gene (formerly Entrezgene);Acc:827261]
AT4G16155	NA	AT4G16155	NCBI gene (formerly Entrezgene)	dihydrolipoamide dehydrogenase [Source:NCBI gene (formerly Entrezgene);Acc:827307]
AT4G16442	NA	AT4G16442	NCBI gene (formerly Entrezgene)	Uncharacterized protein family (UPF0497) [Source:NCBI gene (formerly Entrezgene);Acc:827339]
AT4G16570	ATPRMT7	PRMT7	NCBI gene (formerly Entrezgene)	protein arginine methyltransferase 7 [Source:NCBI gene (formerly Entrezgene);Acc:827358]
AT4G16980	NA	AT4G16980	NCBI gene (formerly Entrezgene)	arabinogalactan-protein family [Source:NCBI gene (formerly Entrezgene);Acc:827406]
AT4G17190	FPS2	FPS2	NCBI gene (formerly Entrezgene)	farnesyl diphosphate synthase 2 [Source:NCBI gene (formerly Entrezgene);Acc:827430]
AT4G17300	NS1	NS1	NCBI gene (formerly Entrezgene)	Class II aminoacyl-tRNA and biotin synthetases superfamily protein [Source:NCBI gene (formerly Entrezgene);Acc:827443]
AT4G17540	NA	AT4G17540	NCBI gene (formerly Entrezgene)	dynamin [Source:NCBI gene (formerly Entrezgene);Acc:827469]
AT4G17560	NA	AT4G17560	NCBI gene (formerly Entrezgene)	Ribosomal protein L19 family protein [Source:NCBI gene (formerly Entrezgene);Acc:827471]
AT4G17600	LIL3:1	LIL3:1	NCBI gene (formerly Entrezgene)	Chlorophyll A-B binding family protein [Source:NCBI gene (formerly Entrezgene);Acc:827479]
AT4G17810	NA	AT4G17810	NCBI gene (formerly Entrezgene)	C2H2 and C2HC zinc fingers superfamily protein [Source:NCBI gene (formerly Entrezgene);Acc:827503]
AT4G18370	DEG5	DEG5	NCBI gene (formerly Entrezgene)	DEGP protease 5 [Source:NCBI gene (formerly Entrezgene);Acc:827564]
AT4G18480	CHLI1	CHLI1	NCBI gene (formerly Entrezgene)	P-loop containing nucleoside triphosphate hydrolases superfamily protein [Source:NCBI gene (formerly Entrezgene);Acc:827580]
AT4G18670	NA	AT4G18670	NCBI gene (formerly Entrezgene)	Leucine-rich repeat (LRR) family protein [Source:NCBI gene (formerly Entrezgene);Acc:827601]
AT4G19380	NA	AT4G19380	NCBI gene (formerly Entrezgene)	Long-chain fatty alcohol dehydrogenase family protein [Source:NCBI gene (formerly Entrezgene);Acc:827679]
AT4G19830	NA	AT4G19830	NCBI gene (formerly Entrezgene)	FKBP-like peptidyl-prolyl cis-trans isomerase family protein [Source:NCBI gene (formerly Entrezgene);Acc:827727]
AT4G19985	NA	AT4G19985	NCBI gene (formerly Entrezgene)	Acyl-CoA N-acyltransferases (NAT) superfamily protein [Source:NCBI gene (formerly Entrezgene);Acc:827743]
AT4G20130	PTAC14	PTAC14	NCBI gene (formerly Entrezgene)	plastid transcriptionally active 14 [Source:NCBI gene (formerly Entrezgene);Acc:827759]
AT4G20270	BAM3	BAM3	NCBI gene (formerly Entrezgene)	Leucine-rich receptor-like protein kinase family protein [Source:NCBI gene (formerly Entrezgene);Acc:827774]
AT4G20360	ATRAB8D	RABE1b	NCBI gene (formerly Entrezgene)	RAB GTPase homolog E1B [Source:NCBI gene (formerly Entrezgene);Acc:827784]
AT4G20760	NA	AT4G20760	NCBI gene (formerly Entrezgene)	NAD(P)-binding Rossmann-fold superfamily protein [Source:NCBI gene (formerly Entrezgene);Acc:827824]
AT4G20870	FAH2	FAH2	NCBI gene (formerly Entrezgene)	fatty acid hydroxylase 2 [Source:NCBI gene (formerly Entrezgene);Acc:827835]
AT4G21070	ATBRCA1	BRCA1	NCBI gene (formerly Entrezgene)	breast cancer susceptibility1 [Source:NCBI gene (formerly Entrezgene);Acc:827854]
AT4G21280	PSBQ	PSBQA	NCBI gene (formerly Entrezgene)	photosystem II subunit QA [Source:NCBI gene (formerly Entrezgene);Acc:827877]
AT4G21760	BGLU47	BGLU47	NCBI gene (formerly Entrezgene)	beta-glucosidase 47 [Source:NCBI gene (formerly Entrezgene);Acc:828264]
AT4G22290	NA	AT4G22290	NCBI gene (formerly Entrezgene)	Ubiquitin-specific protease family C19-related protein [Source:NCBI gene (formerly Entrezgene);Acc:828324]
AT4G22490	NA	AT4G22490	NCBI gene (formerly Entrezgene)	Bifunctional inhibitor/lipid-transfer protein/seed storage 2S albumin superfamily protein [Source:NCBI gene (formerly Entrezgene);Acc:828344]
AT4G22850	NA	AT4G22850	NCBI gene (formerly Entrezgene)	SNARE associated Golgi protein family [Source:NCBI gene (formerly Entrezgene);Acc:828384]
AT4G23500	NA	AT4G23500	NCBI gene (formerly Entrezgene)	Pectin lyase-like superfamily protein [Source:NCBI gene (formerly Entrezgene);Acc:828450]
AT4G23790	TBL24	TBL24	NCBI gene (formerly Entrezgene)	TRICHOME BIREFRINGENCE-LIKE 24 [Source:NCBI gene (formerly Entrezgene);Acc:828479]
AT4G23820	NA	AT4G23820	NCBI gene (formerly Entrezgene)	Pectin lyase-like superfamily protein [Source:NCBI gene (formerly Entrezgene);Acc:828482]
AT4G23940	NA	FtsHi1	NCBI gene (formerly Entrezgene)	FtsH extracellular protease family [Source:NCBI gene (formerly Entrezgene);Acc:828494]
AT4G24090	NA	AT4G24090	NCBI gene (formerly Entrezgene)	homer protein [Source:NCBI gene (formerly Entrezgene);Acc:828509]
AT4G24250	MLO13	MLO13	NCBI gene (formerly Entrezgene)	Seven transmembrane MLO family protein [Source:NCBI gene (formerly Entrezgene);Acc:828526]
AT4G24620	PGI1	PGI1	NCBI gene (formerly Entrezgene)	phosphoglucose isomerase 1 [Source:NCBI gene (formerly Entrezgene);Acc:828564]
AT4G24770	RBP31	RBP31	NCBI gene (formerly Entrezgene)	31-kDa RNA binding protein [Source:NCBI gene (formerly Entrezgene);Acc:828579]
AT4G24930	NA	AT4G24930	NCBI gene (formerly Entrezgene)	thylakoid lumenal 17.9 kDa protein, chloroplast [Source:NCBI gene (formerly Entrezgene);Acc:828595]
AT4G25050	ACP4	ACP4	NCBI gene (formerly Entrezgene)	acyl carrier protein 4 [Source:NCBI gene (formerly Entrezgene);Acc:828608]
AT4G25080	CHLM	CHLM	NCBI gene (formerly Entrezgene)	magnesium-protoporphyrin IX methyltransferase [Source:NCBI gene (formerly Entrezgene);Acc:828611]
AT4G25290	NA	AT4G25290	NCBI gene (formerly Entrezgene)	DNA photolyase [Source:NCBI gene (formerly Entrezgene);Acc:828632]
AT4G25990	CIL	CIL	NCBI gene (formerly Entrezgene)	CCT motif family protein [Source:NCBI gene (formerly Entrezgene);Acc:828705]
AT4G26555	NA	AT4G26555	NCBI gene (formerly Entrezgene)	FKBP-like peptidyl-prolyl cis-trans isomerase family protein [Source:NCBI gene (formerly Entrezgene);Acc:828762]
AT4G27030	FAD4	FADA	NCBI gene (formerly Entrezgene)	fatty acid desaturase A [Source:NCBI gene (formerly Entrezgene);Acc:828811]
AT4G27370	VIIIB	VIIIB	NCBI gene (formerly Entrezgene)	P-loop containing nucleoside triphosphate hydrolases superfamily protein [Source:NCBI gene (formerly Entrezgene);Acc:828845]
AT4G27430	CIP7	CIP7	NCBI gene (formerly Entrezgene)	COP1-interacting protein 7 [Source:NCBI gene (formerly Entrezgene);Acc:828851]
AT4G27440	PORB	PORB	NCBI gene (formerly Entrezgene)	protochlorophyllide oxidoreductase B [Source:NCBI gene (formerly Entrezgene);Acc:828853]
AT4G27760	FEY	FEY	NCBI gene (formerly Entrezgene)	NAD(P)-binding Rossmann-fold superfamily protein [Source:NCBI gene (formerly Entrezgene);Acc:828890]
AT4G28050	TET7	TET7	NCBI gene (formerly Entrezgene)	tetraspanin7 [Source:NCBI gene (formerly Entrezgene);Acc:828920]
AT4G28080	NA	AT4G28080	NCBI gene (formerly Entrezgene)	Tetratricopeptide repeat (TPR)-like superfamily protein [Source:NCBI gene (formerly Entrezgene);Acc:828923]
AT4G28180	NA	AT4G28180	NCBI gene (formerly Entrezgene)	NA
AT4G28660	PSB28	PSB28	NCBI gene (formerly Entrezgene)	photosystem II reaction center PSB28 protein [Source:NCBI gene (formerly Entrezgene);Acc:828984]
AT4G28730	NA	GrxC5	NCBI gene (formerly Entrezgene)	Glutaredoxin family protein [Source:NCBI gene (formerly Entrezgene);Acc:828994]
AT4G28780	NA	AT4G28780	NCBI gene (formerly Entrezgene)	GDSL-like Lipase/Acylhydrolase superfamily protein [Source:NCBI gene (formerly Entrezgene);Acc:828999]
AT4G29310	NA	AT4G29310	NCBI gene (formerly Entrezgene)	DUF1005 family protein (DUF1005) [Source:NCBI gene (formerly Entrezgene);Acc:829053]
AT4G30410	NA	AT4G30410	NCBI gene (formerly Entrezgene)	sequence-specific DNA binding transcription factor [Source:NCBI gene (formerly Entrezgene);Acc:829164]
AT4G31250	NA	AT4G31250	NCBI gene (formerly Entrezgene)	Leucine-rich repeat protein kinase family protein [Source:NCBI gene (formerly Entrezgene);Acc:829252]
AT4G31270	NA	AT4G31270	NCBI gene (formerly Entrezgene)	sequence-specific DNA binding transcription factor [Source:NCBI gene (formerly Entrezgene);Acc:829254]
AT4G31290	NA	AT4G31290	NCBI gene (formerly Entrezgene)	ChaC-like family protein [Source:NCBI gene (formerly Entrezgene);Acc:829256]
AT4G31590	ATCSLC05	CSLC5	NCBI gene (formerly Entrezgene)	Cellulose-synthase-like C5 [Source:NCBI gene (formerly Entrezgene);Acc:829286]
AT4G31850	PGR3	PGR3	NCBI gene (formerly Entrezgene)	proton gradient regulation 3 [Source:NCBI gene (formerly Entrezgene);Acc:829314]
AT4G32710	NA	PERK14	NCBI gene (formerly Entrezgene)	Protein kinase superfamily protein [Source:NCBI gene (formerly Entrezgene);Acc:3770575]
AT4G32915	NA	AT4G32915	NCBI gene (formerly Entrezgene)	glutamyl-tRNA(Gln) amidotransferase subunit C [Source:NCBI gene (formerly Entrezgene);Acc:829428]
AT4G33000	CBL10	CBL10	NCBI gene (formerly Entrezgene)	calcineurin B-like protein 10 [Source:NCBI gene (formerly Entrezgene);Acc:829437]
AT4G33220	PME44	PME44	NCBI gene (formerly Entrezgene)	pectin methylesterase 44 [Source:NCBI gene (formerly Entrezgene);Acc:829458]
AT4G33360	FLDH	FLDH	NCBI gene (formerly Entrezgene)	NAD(P)-binding Rossmann-fold superfamily protein [Source:NCBI gene (formerly Entrezgene);Acc:829473]
AT4G34090	NA	AT4G34090	NCBI gene (formerly Entrezgene)	cyclin delta-3 [Source:NCBI gene (formerly Entrezgene);Acc:829555]
AT4G34190	2023-09-01	2023-09-01	NCBI gene (formerly Entrezgene)	stress enhanced protein 1 [Source:NCBI gene (formerly Entrezgene);Acc:829567]
AT4G34220	NA	AT4G34220	NCBI gene (formerly Entrezgene)	Leucine-rich repeat protein kinase family protein [Source:NCBI gene (formerly Entrezgene);Acc:829571]
AT4G34620	SSR16	SSR16	NCBI gene (formerly Entrezgene)	small subunit ribosomal protein 16 [Source:NCBI gene (formerly Entrezgene);Acc:829614]
AT4G34730	NA	AT4G34730	NCBI gene (formerly Entrezgene)	ribosome-binding factor A family protein [Source:NCBI gene (formerly Entrezgene);Acc:829625]
AT4G34750	NA	AT4G34750	NCBI gene (formerly Entrezgene)	SAUR-like auxin-responsive protein family [Source:NCBI gene (formerly Entrezgene);Acc:829627]
AT4G34760	NA	AT4G34760	NCBI gene (formerly Entrezgene)	SAUR-like auxin-responsive protein family [Source:NCBI gene (formerly Entrezgene);Acc:829628]
AT4G35100	PIP3	PIP3	NCBI gene (formerly Entrezgene)	plasma membrane intrinsic protein 3 [Source:NCBI gene (formerly Entrezgene);Acc:829662]
AT4G35730	NA	AT4G35730	NCBI gene (formerly Entrezgene)	Regulator of Vps4 activity in the MVB pathway protein [Source:NCBI gene (formerly Entrezgene);Acc:829726]
AT4G35920	MCA1	MCA1	NCBI gene (formerly Entrezgene)	PLAC8 family protein [Source:NCBI gene (formerly Entrezgene);Acc:829747]
AT4G35950	ARAC6	RAC6	NCBI gene (formerly Entrezgene)	RAC-like 6 [Source:NCBI gene (formerly Entrezgene);Acc:829750]
AT4G36230	NA	AT4G36230	NCBI gene (formerly Entrezgene)	transmembrane protein [Source:NCBI gene (formerly Entrezgene);Acc:3770585]
AT4G36850	NA	AT4G36850	NCBI gene (formerly Entrezgene)	PQ-loop repeat family protein / transmembrane family protein [Source:NCBI gene (formerly Entrezgene);Acc:829838]
AT4G37110	NA	AT4G37110	NCBI gene (formerly Entrezgene)	Zinc-finger domain of monoamine-oxidase A repressor R1 [Source:NCBI gene (formerly Entrezgene);Acc:829865]
AT4G37220	NA	AT4G37220	NCBI gene (formerly Entrezgene)	Cold acclimation protein WCOR413 family [Source:NCBI gene (formerly Entrezgene);Acc:829876]
AT4G37280	NA	AT4G37280	NCBI gene (formerly Entrezgene)	MRG family protein [Source:NCBI gene (formerly Entrezgene);Acc:829882]
AT4G37550	NA	AT4G37550	NCBI gene (formerly Entrezgene)	Acetamidase/Formamidase family protein [Source:NCBI gene (formerly Entrezgene);Acc:829910]
AT4G37800	XTH7	XTH7	NCBI gene (formerly Entrezgene)	xyloglucan endotransglucosylase/hydrolase 7 [Source:NCBI gene (formerly Entrezgene);Acc:829936]
AT4G38430	ATROPGEF1	ROPGEF1	NCBI gene (formerly Entrezgene)	rho guanyl-nucleotide exchange factor 1 [Source:NCBI gene (formerly Entrezgene);Acc:830000]
AT4G38860	NA	AT4G38860	NCBI gene (formerly Entrezgene)	SAUR-like auxin-responsive protein family [Source:NCBI gene (formerly Entrezgene);Acc:830041]
AT4G38950	NA	AT4G38950	NCBI gene (formerly Entrezgene)	ATP binding microtubule motor family protein [Source:NCBI gene (formerly Entrezgene);Acc:830050]
AT4G39040	NA	AT4G39040	NCBI gene (formerly Entrezgene)	RNA-binding CRS1 / YhbY (CRM) domain protein [Source:NCBI gene (formerly Entrezgene);Acc:830059]
AT4G39050	NA	AT4G39050	NCBI gene (formerly Entrezgene)	Kinesin motor family protein [Source:NCBI gene (formerly Entrezgene);Acc:830060]
AT4G39620	EMB2453	EMB2453	NCBI gene (formerly Entrezgene)	Tetratricopeptide repeat (TPR)-like superfamily protein [Source:NCBI gene (formerly Entrezgene);Acc:830116]
AT4G39900	NA	AT4G39900	NCBI gene (formerly Entrezgene)	adenine deaminase [Source:NCBI gene (formerly Entrezgene);Acc:830149]
AT5G01015	NA	AT5G01015	NCBI gene (formerly Entrezgene)	transmembrane protein [Source:NCBI gene (formerly Entrezgene);Acc:831731]
AT5G01590	NA	AT5G01590	NCBI gene (formerly Entrezgene)	histone-lysine N-methyltransferase ATXR3-like protein [Source:NCBI gene (formerly Entrezgene);Acc:830369]
AT5G01630	BRCA2B	BRCA2B	NCBI gene (formerly Entrezgene)	BRCA2-like B [Source:NCBI gene (formerly Entrezgene);Acc:831710]
AT5G02160	NA	AT5G02160	NCBI gene (formerly Entrezgene)	transmembrane protein [Source:NCBI gene (formerly Entrezgene);Acc:831910]
AT5G02450	NA	AT5G02450	NCBI gene (formerly Entrezgene)	Ribosomal protein L36e family protein [Source:NCBI gene (formerly Entrezgene);Acc:831907]
AT5G02540	NA	AT5G02540	NCBI gene (formerly Entrezgene)	NAD(P)-binding Rossmann-fold superfamily protein [Source:NCBI gene (formerly Entrezgene);Acc:831913]
AT5G02710	NA	AT5G02710	NCBI gene (formerly Entrezgene)	zinc/iron-chelating domain protein [Source:NCBI gene (formerly Entrezgene);Acc:831827]
AT5G02890	NA	AT5G02890	NCBI gene (formerly Entrezgene)	HXXXD-type acyl-transferase family protein [Source:NCBI gene (formerly Entrezgene);Acc:831751]
AT5G03670	NA	TRM28	NCBI gene (formerly Entrezgene)	histone-lysine N-methyltransferase SETD1B-like protein [Source:NCBI gene (formerly Entrezgene);Acc:831763]
AT5G03940	FFC	CPSRP54	NCBI gene (formerly Entrezgene)	chloroplast signal recognition particle 54 kDa subunit [Source:NCBI gene (formerly Entrezgene);Acc:830273]
AT5G04320	NA	AT5G04320	NCBI gene (formerly Entrezgene)	Shugoshin C terminus [Source:NCBI gene (formerly Entrezgene);Acc:830311]
AT5G04890	RTM2	RTM2	NCBI gene (formerly Entrezgene)	HSP20-like chaperones superfamily protein [Source:NCBI gene (formerly Entrezgene);Acc:830370]
AT5G05740	EGY2	EGY2	NCBI gene (formerly Entrezgene)	ethylene-dependent gravitropism-deficient and yellow-green-like 2 [Source:NCBI gene (formerly Entrezgene);Acc:830458]
AT5G05890	NA	AT5G05890	NCBI gene (formerly Entrezgene)	UDP-Glycosyltransferase superfamily protein [Source:NCBI gene (formerly Entrezgene);Acc:830474]
AT5G05940	ATROPGEF5	ROPGEF5	NCBI gene (formerly Entrezgene)	ROP guanine nucleotide exchange factor 5 [Source:NCBI gene (formerly Entrezgene);Acc:830479]
AT5G06290	2-Cys Prx B	2-Cys Prx B	NCBI gene (formerly Entrezgene)	2-cysteine peroxiredoxin B [Source:NCBI gene (formerly Entrezgene);Acc:830517]
AT5G06970	NA	AT5G06970	NCBI gene (formerly Entrezgene)	plant/protein (DUF810) [Source:NCBI gene (formerly Entrezgene);Acc:830588]
AT5G07590	NA	AT5G07590	NCBI gene (formerly Entrezgene)	Transducin/WD40 repeat-like superfamily protein [Source:NCBI gene (formerly Entrezgene);Acc:830652]
AT5G08050	NA	AT5G08050	NCBI gene (formerly Entrezgene)	wiskott-aldrich syndrome family protein, putative (DUF1118) [Source:NCBI gene (formerly Entrezgene);Acc:830699]
AT5G08280	HEMC	HEMC	NCBI gene (formerly Entrezgene)	hydroxymethylbilane synthase [Source:NCBI gene (formerly Entrezgene);Acc:830724]
AT5G08330	NA	TCP11	NCBI gene (formerly Entrezgene)	TCP family transcription factor [Source:NCBI gene (formerly Entrezgene);Acc:830730]
AT5G09650	AtPPa6	PPa6	NCBI gene (formerly Entrezgene)	pyrophosphorylase 6 [Source:NCBI gene (formerly Entrezgene);Acc:830824]
AT5G09760	NA	AT5G09760	NCBI gene (formerly Entrezgene)	Plant invertase/pectin methylesterase inhibitor superfamily [Source:NCBI gene (formerly Entrezgene);Acc:830836]
AT5G09995	NA	AT5G09995	NCBI gene (formerly Entrezgene)	transmembrane protein [Source:NCBI gene (formerly Entrezgene);Acc:830861]
AT5G10150	NA	AT5G10150	NCBI gene (formerly Entrezgene)	UPSTREAM OF FLC protein (DUF966) [Source:NCBI gene (formerly Entrezgene);Acc:830879]
AT5G10160	NA	AT5G10160	NCBI gene (formerly Entrezgene)	Thioesterase superfamily protein [Source:NCBI gene (formerly Entrezgene);Acc:830880]
AT5G10200	NA	AT5G10200	NCBI gene (formerly Entrezgene)	ARM-repeat/Tetratricopeptide repeat (TPR)-like protein [Source:NCBI gene (formerly Entrezgene);Acc:830884]
AT5G10460	NA	AT5G10460	NCBI gene (formerly Entrezgene)	Haloacid dehalogenase-like hydrolase (HAD) superfamily protein [Source:NCBI gene (formerly Entrezgene);Acc:830910]
AT5G10540	NA	AT5G10540	NCBI gene (formerly Entrezgene)	Zincin-like metalloproteases family protein [Source:NCBI gene (formerly Entrezgene);Acc:830919]
AT5G10620	NA	AT5G10620	NCBI gene (formerly Entrezgene)	methyltransferase [Source:NCBI gene (formerly Entrezgene);Acc:830927]
AT5G10690	NA	AT5G10690	NCBI gene (formerly Entrezgene)	pentatricopeptide (PPR) repeat-containing protein / CBS domain-containing protein [Source:NCBI gene (formerly Entrezgene);Acc:830933]
AT5G10900	NA	AT5G10900	NCBI gene (formerly Entrezgene)	Calcineurin-like metallo-phosphoesterase superfamily protein [Source:NCBI gene (formerly Entrezgene);Acc:830957]
AT5G11450	NA	PPD5	NCBI gene (formerly Entrezgene)	PsbP domain protein (Mog1/PsbP/DUF1795-like photosystem II reaction center PsbP family protein) [Source:NCBI gene (formerly Entrezgene);Acc:831016]
AT5G11480	NA	AT5G11480	NCBI gene (formerly Entrezgene)	P-loop containing nucleoside triphosphate hydrolases superfamily protein [Source:NCBI gene (formerly Entrezgene);Acc:831019]
AT5G12940	NA	AT5G12940	NCBI gene (formerly Entrezgene)	Leucine-rich repeat (LRR) family protein [Source:NCBI gene (formerly Entrezgene);Acc:831134]
AT5G13120	CYP20-2	Pnsl5	NCBI gene (formerly Entrezgene)	cyclophilin 20-2 [Source:NCBI gene (formerly Entrezgene);Acc:831151]
AT5G13140	NA	AT5G13140	NCBI gene (formerly Entrezgene)	Pollen Ole e 1 allergen and extensin family protein [Source:NCBI gene (formerly Entrezgene);Acc:831153]
AT5G13260	NA	AT5G13260	NCBI gene (formerly Entrezgene)	myosin [Source:NCBI gene (formerly Entrezgene);Acc:831167]
AT5G13460	IQD11	IQD11	NCBI gene (formerly Entrezgene)	IQ-domain 11 [Source:NCBI gene (formerly Entrezgene);Acc:831188]
AT5G13510	NA	EMB3136	NCBI gene (formerly Entrezgene)	Ribosomal protein L10 family protein [Source:NCBI gene (formerly Entrezgene);Acc:831195]
AT5G13630	GUN5	GUN5	NCBI gene (formerly Entrezgene)	magnesium-chelatase subunit chlH, chloroplast, putative / Mg-protoporphyrin IX chelatase, putative (CHLH) [Source:NCBI gene (formerly Entrezgene);Acc:831207]
AT5G13710	SMT1	SMT1	NCBI gene (formerly Entrezgene)	sterol methyltransferase 1 [Source:NCBI gene (formerly Entrezgene);Acc:831216]
AT5G13730	SIG4	SIG4	NCBI gene (formerly Entrezgene)	sigma factor 4 [Source:NCBI gene (formerly Entrezgene);Acc:831218]
AT5G13770	NA	AT5G13770	NCBI gene (formerly Entrezgene)	Pentatricopeptide repeat (PPR-like) superfamily protein [Source:NCBI gene (formerly Entrezgene);Acc:831222]
AT5G13980	NA	AT5G13980	NCBI gene (formerly Entrezgene)	Glycosyl hydrolase family 38 protein [Source:NCBI gene (formerly Entrezgene);Acc:831246]
AT5G14320	NA	EMB3137	NCBI gene (formerly Entrezgene)	Ribosomal protein S13/S18 family [Source:NCBI gene (formerly Entrezgene);Acc:831282]
AT5G14460	NA	AT5G14460	NCBI gene (formerly Entrezgene)	Pseudouridine synthase family protein [Source:NCBI gene (formerly Entrezgene);Acc:831297]
AT5G14610	NA	AT5G14610	NCBI gene (formerly Entrezgene)	DEAD box RNA helicase family protein [Source:NCBI gene (formerly Entrezgene);Acc:831313]
AT5G14790	NA	AT5G14790	NCBI gene (formerly Entrezgene)	ARM repeat superfamily protein [Source:NCBI gene (formerly Entrezgene);Acc:831331]
AT5G14910	NA	AT5G14910	NCBI gene (formerly Entrezgene)	Heavy metal transport/detoxification superfamily protein [Source:NCBI gene (formerly Entrezgene);Acc:831343]
AT5G15780	NA	AT5G15780	NCBI gene (formerly Entrezgene)	Pollen Ole e 1 allergen and extensin family protein [Source:NCBI gene (formerly Entrezgene);Acc:831434]
AT5G16030	NA	AT5G16030	NCBI gene (formerly Entrezgene)	mental retardation GTPase activating protein [Source:NCBI gene (formerly Entrezgene);Acc:831460]
AT5G16140	NA	AT5G16140	NCBI gene (formerly Entrezgene)	Peptidyl-tRNA hydrolase family protein [Source:NCBI gene (formerly Entrezgene);Acc:831471]
AT5G16390	CAC1	CAC1	NCBI gene (formerly Entrezgene)	chloroplastic acetylcoenzyme A carboxylase 1 [Source:NCBI gene (formerly Entrezgene);Acc:831500]
AT5G16440	IPP1	IPP1	NCBI gene (formerly Entrezgene)	isopentenyl diphosphate isomerase 1 [Source:NCBI gene (formerly Entrezgene);Acc:831505]
AT5G16590	LRR1	AT5G16590	NCBI gene (formerly Entrezgene)	Leucine-rich repeat protein kinase family protein [Source:NCBI gene (formerly Entrezgene);Acc:831521]
AT5G16715	EMB2247	EMB2247	NCBI gene (formerly Entrezgene)	protein EMBRYO DEFECTIVE 2247 [Source:NCBI gene (formerly Entrezgene);Acc:831533]
AT5G16870	NA	AT5G16870	NCBI gene (formerly Entrezgene)	Peptidyl-tRNA hydrolase II (PTH2) family protein [Source:NCBI gene (formerly Entrezgene);Acc:831550]
AT5G17230	PSY	PSY	NCBI gene (formerly Entrezgene)	PHYTOENE SYNTHASE [Source:NCBI gene (formerly Entrezgene);Acc:831587]
AT5G17310	UGP2	UGP2	NCBI gene (formerly Entrezgene)	UDP-glucose pyrophosphorylase 2 [Source:NCBI gene (formerly Entrezgene);Acc:831596]
AT5G17400	ER-ANT1	ER-ANT1	NCBI gene (formerly Entrezgene)	endoplasmic reticulum-adenine nucleotide transporter 1 [Source:NCBI gene (formerly Entrezgene);Acc:831606]
AT5G17870	PSRP6	PSRP6	NCBI gene (formerly Entrezgene)	plastid-specific 50S ribosomal protein 6 [Source:NCBI gene (formerly Entrezgene);Acc:831655]
AT5G18410	PIR	PIR121	NCBI gene (formerly Entrezgene)	transcription activator [Source:NCBI gene (formerly Entrezgene);Acc:831959]
AT5G18460	NA	AT5G18460	NCBI gene (formerly Entrezgene)	carboxyl-terminal peptidase (DUF239) [Source:NCBI gene (formerly Entrezgene);Acc:831964]
AT5G18660	PCB2	PCB2	NCBI gene (formerly Entrezgene)	NAD(P)-binding Rossmann-fold superfamily protein [Source:NCBI gene (formerly Entrezgene);Acc:831984]
AT5G18970	NA	AT5G18970	NCBI gene (formerly Entrezgene)	AWPM-19-like family protein [Source:NCBI gene (formerly Entrezgene);Acc:832015]
AT5G19760	NA	AT5G19760	NCBI gene (formerly Entrezgene)	Mitochondrial substrate carrier family protein [Source:NCBI gene (formerly Entrezgene);Acc:832096]
AT5G20060	NA	AT5G20060	NCBI gene (formerly Entrezgene)	alpha/beta-Hydrolases superfamily protein [Source:NCBI gene (formerly Entrezgene);Acc:832128]
AT5G20500	NA	AT5G20500	NCBI gene (formerly Entrezgene)	Glutaredoxin family protein [Source:NCBI gene (formerly Entrezgene);Acc:832172]
AT5G21222	NA	AT5G21222	NCBI gene (formerly Entrezgene)	protein kinase family protein [Source:NCBI gene (formerly Entrezgene);Acc:832244]
AT5G21920	YLMG2	YLMG2	NCBI gene (formerly Entrezgene)	YGGT family protein [Source:NCBI gene (formerly Entrezgene);Acc:832252]
AT5G21930	PAA2	PAA2	NCBI gene (formerly Entrezgene)	P-type ATPase of Arabidopsis 2 [Source:NCBI gene (formerly Entrezgene);Acc:832253]
AT5G22340	NA	AT5G22340	NCBI gene (formerly Entrezgene)	NF-kappa-B inhibitor-like protein [Source:NCBI gene (formerly Entrezgene);Acc:832294]
AT5G22640	emb1211	emb1211	NCBI gene (formerly Entrezgene)	MORN (Membrane Occupation and Recognition Nexus) repeat-containing protein [Source:NCBI gene (formerly Entrezgene);Acc:832327]
AT5G22800	EMB86	EMB1030	NCBI gene (formerly Entrezgene)	Alanyl-tRNA synthetase, class IIc [Source:NCBI gene (formerly Entrezgene);Acc:832343]
AT5G22830	ATMGT10	MGT10	NCBI gene (formerly Entrezgene)	magnesium (Mg) transporter 10 [Source:NCBI gene (formerly Entrezgene);Acc:832346]
AT5G22940	F8H	F8H	NCBI gene (formerly Entrezgene)	glucuronoxylan glucuronosyltransferase, putative [Source:NCBI gene (formerly Entrezgene);Acc:832358]
AT5G23420	HMGB6	HMGB6	NCBI gene (formerly Entrezgene)	high-mobility group box 6 [Source:NCBI gene (formerly Entrezgene);Acc:832408]
AT5G23670	LCB2	LCB2	NCBI gene (formerly Entrezgene)	long chain base2 [Source:NCBI gene (formerly Entrezgene);Acc:832432]
AT5G24165	NA	AT5G24165	NCBI gene (formerly Entrezgene)	NA
AT5G24314	PTAC7;PDE225	PTAC7	NCBI gene (formerly Entrezgene)	plastid transcriptionally active7 [Source:NCBI gene (formerly Entrezgene);Acc:832500]
AT5G24490	NA	AT5G24490	NCBI gene (formerly Entrezgene)	30S ribosomal protein [Source:NCBI gene (formerly Entrezgene);Acc:832520]
AT5G24990	NA	AT5G24990	NCBI gene (formerly Entrezgene)	enhanced disease resistance-like protein (DUF1336) [Source:NCBI gene (formerly Entrezgene);Acc:832569]
AT5G25370	PLDALPHA3	PLDALPHA3	NCBI gene (formerly Entrezgene)	phospholipase D alpha 3 [Source:NCBI gene (formerly Entrezgene);Acc:832609]
AT5G26000	TGG1	TGG1	NCBI gene (formerly Entrezgene)	thioglucoside glucohydrolase 1 [Source:NCBI gene (formerly Entrezgene);Acc:832669]
AT5G26160	NA	AT5G26160	NCBI gene (formerly Entrezgene)	light-independent protochlorophyllide reductase subunit [Source:NCBI gene (formerly Entrezgene);Acc:832685]
AT5G26670	NA	AT5G26670	NCBI gene (formerly Entrezgene)	Pectinacetylesterase family protein [Source:NCBI gene (formerly Entrezgene);Acc:832722]
AT5G26820	ATIREG3	IREG3	NCBI gene (formerly Entrezgene)	iron-regulated protein 3 [Source:NCBI gene (formerly Entrezgene);Acc:832740]
AT5G27390	NA	AT5G27390	NCBI gene (formerly Entrezgene)	tagatose-6-phosphate ketose/aldose isomerase, putative (Mog1/PsbP/DUF1795-like photosystem II reaction center PsbP family protein) [Source:NCBI gene (formerly Entrezgene);Acc:832798]
AT5G27450	MVK;MK	MK	NCBI gene (formerly Entrezgene)	mevalonate kinase [Source:NCBI gene (formerly Entrezgene);Acc:832804]
AT5G30510	RPS1	RPS1	NCBI gene (formerly Entrezgene)	ribosomal protein S1 [Source:NCBI gene (formerly Entrezgene);Acc:833138]
AT5G35360	CAC2	CAC2	NCBI gene (formerly Entrezgene)	acetyl Co-enzyme a carboxylase biotin carboxylase subunit [Source:NCBI gene (formerly Entrezgene);Acc:833497]
AT5G35740	NA	AT5G35740	NCBI gene (formerly Entrezgene)	Carbohydrate-binding X8 domain superfamily protein [Source:NCBI gene (formerly Entrezgene);Acc:833551]
AT5G35790	G6PD1	G6PD1	NCBI gene (formerly Entrezgene)	glucose-6-phosphate dehydrogenase 1 [Source:NCBI gene (formerly Entrezgene);Acc:833559]
AT5G37660	PDLP7	PDLP7	NCBI gene (formerly Entrezgene)	plasmodesmata-located protein 7 [Source:NCBI gene (formerly Entrezgene);Acc:833744]
AT5G38300	NA	AT5G38300	NCBI gene (formerly Entrezgene)	homeobox Hox-B3-like protein [Source:NCBI gene (formerly Entrezgene);Acc:833812]
AT5G38430	NA	RBCS1B	NCBI gene (formerly Entrezgene)	Ribulose bisphosphate carboxylase (small chain) family protein [Source:NCBI gene (formerly Entrezgene);Acc:833830]
AT5G38940	NA	AT5G38940	NCBI gene (formerly Entrezgene)	RmlC-like cupins superfamily protein [Source:NCBI gene (formerly Entrezgene);Acc:833886]
AT5G39530	NA	AT5G39530	NCBI gene (formerly Entrezgene)	NA
AT5G40740	NA	2023-08-06	NCBI gene (formerly Entrezgene)	HAUS augmin-like complex subunit [Source:NCBI gene (formerly Entrezgene);Acc:834074]
AT5G40950	RPL27	RPL27	NCBI gene (formerly Entrezgene)	ribosomal protein large subunit 27 [Source:NCBI gene (formerly Entrezgene);Acc:834097]
AT5G41060	NA	AT5G41060	NCBI gene (formerly Entrezgene)	DHHC-type zinc finger family protein [Source:NCBI gene (formerly Entrezgene);Acc:834108]
AT5G42070	NA	AT5G42070	NCBI gene (formerly Entrezgene)	NA
AT5G42240	scpl42	scpl42	NCBI gene (formerly Entrezgene)	serine carboxypeptidase-like 42 [Source:NCBI gene (formerly Entrezgene);Acc:834229]
AT5G42810	ATIPK1	IPK1	NCBI gene (formerly Entrezgene)	inositol-pentakisphosphate 2-kinase 1 [Source:NCBI gene (formerly Entrezgene);Acc:834292]
AT5G43050	NPQ6	NPQ6	NCBI gene (formerly Entrezgene)	YCF20-like protein (DUF565) [Source:NCBI gene (formerly Entrezgene);Acc:834320]
AT5G44340	TUB4	TUB4	NCBI gene (formerly Entrezgene)	tubulin beta chain 4 [Source:NCBI gene (formerly Entrezgene);Acc:834459]
AT5G44680	NA	AT5G44680	NCBI gene (formerly Entrezgene)	DNA glycosylase superfamily protein [Source:NCBI gene (formerly Entrezgene);Acc:834497]
AT5G45040	NA	CYTC6A	NCBI gene (formerly Entrezgene)	Cytochrome c [Source:NCBI gene (formerly Entrezgene);Acc:834535]
AT5G45290	NA	AT5G45290	NCBI gene (formerly Entrezgene)	RING/U-box superfamily protein [Source:NCBI gene (formerly Entrezgene);Acc:834565]
AT5G45390	CLPP4	CLPP4	NCBI gene (formerly Entrezgene)	CLP protease P4 [Source:NCBI gene (formerly Entrezgene);Acc:834575]
AT5G45490	NA	AT5G45490	NCBI gene (formerly Entrezgene)	P-loop containing nucleoside triphosphate hydrolases superfamily protein [Source:NCBI gene (formerly Entrezgene);Acc:834585]
AT5G45680	ATFKBP13	FKBP13	NCBI gene (formerly Entrezgene)	FK506-binding protein 13 [Source:NCBI gene (formerly Entrezgene);Acc:834607]
AT5G45930	CHLI2	CHLI2	NCBI gene (formerly Entrezgene)	magnesium chelatase i2 [Source:NCBI gene (formerly Entrezgene);Acc:834633]
AT5G45950	NA	AT5G45950	NCBI gene (formerly Entrezgene)	GDSL-like Lipase/Acylhydrolase superfamily protein [Source:NCBI gene (formerly Entrezgene);Acc:834635]
AT5G46110	APE2	APE2	NCBI gene (formerly Entrezgene)	Glucose-6-phosphate/phosphate translocator-like protein [Source:NCBI gene (formerly Entrezgene);Acc:834652]
AT5G46290	KASI	KASI	NCBI gene (formerly Entrezgene)	3-ketoacyl-acyl carrier protein synthase I [Source:NCBI gene (formerly Entrezgene);Acc:834671]
AT5G46420	NA	AT5G46420	NCBI gene (formerly Entrezgene)	16S rRNA processing protein RimM family [Source:NCBI gene (formerly Entrezgene);Acc:834685]
AT5G46730	NA	AT5G46730	NCBI gene (formerly Entrezgene)	glycine-rich protein [Source:NCBI gene (formerly Entrezgene);Acc:834716]
AT5G46830	ATNIG1	NIG1	NCBI gene (formerly Entrezgene)	calcium-binding transcription factor NIG1 [Source:NCBI gene (formerly Entrezgene);Acc:834727]
AT5G47190	NA	AT5G47190	NCBI gene (formerly Entrezgene)	Ribosomal protein L19 family protein [Source:NCBI gene (formerly Entrezgene);Acc:834765]
AT5G47380	NA	AT5G47380	NCBI gene (formerly Entrezgene)	electron transporter, putative (Protein of unknown function, DUF547) [Source:NCBI gene (formerly Entrezgene);Acc:834785]
AT5G47520	AtRABA5a	RABA5a	NCBI gene (formerly Entrezgene)	RAB GTPase homolog A5A [Source:NCBI gene (formerly Entrezgene);Acc:834802]
AT5G47540	NA	AT5G47540	NCBI gene (formerly Entrezgene)	Mo25 family protein [Source:NCBI gene (formerly Entrezgene);Acc:834804]
AT5G47700	NA	AT5G47700	NCBI gene (formerly Entrezgene)	60S acidic ribosomal protein family [Source:NCBI gene (formerly Entrezgene);Acc:834821]
AT5G47770	FPS1	FPS1	NCBI gene (formerly Entrezgene)	farnesyl diphosphate synthase 1 [Source:NCBI gene (formerly Entrezgene);Acc:834828]
AT5G48220	NA	AT5G48220	NCBI gene (formerly Entrezgene)	Aldolase-type TIM barrel family protein [Source:NCBI gene (formerly Entrezgene);Acc:834875]
AT5G48460	NA	AT5G48460	NCBI gene (formerly Entrezgene)	Actin binding Calponin homology (CH) domain-containing protein [Source:NCBI gene (formerly Entrezgene);Acc:834901]
AT5G48900	NA	AT5G48900	NCBI gene (formerly Entrezgene)	Pectin lyase-like superfamily protein [Source:NCBI gene (formerly Entrezgene);Acc:834948]
AT5G49030	OVA2	OVA2	NCBI gene (formerly Entrezgene)	tRNA synthetase class I (I, L, M and V) family protein [Source:NCBI gene (formerly Entrezgene);Acc:834962]
AT5G49555	NA	AT5G49555	NCBI gene (formerly Entrezgene)	FAD/NAD(P)-binding oxidoreductase family protein [Source:NCBI gene (formerly Entrezgene);Acc:835017]
AT5G51110	NA	AT5G51110	NCBI gene (formerly Entrezgene)	Transcriptional coactivator/pterin dehydratase [Source:NCBI gene (formerly Entrezgene);Acc:835185]
AT5G52100	crr1	CRR1	NCBI gene (formerly Entrezgene)	Dihydrodipicolinate reductase, bacterial/plant [Source:NCBI gene (formerly Entrezgene);Acc:835286]
AT5G52440	HCF106	HCF106	NCBI gene (formerly Entrezgene)	Bacterial sec-independent translocation protein mttA/Hcf106 [Source:NCBI gene (formerly Entrezgene);Acc:835320]
AT5G52540	NA	AT5G52540	NCBI gene (formerly Entrezgene)	keratin-associated protein, putative (DUF819) [Source:NCBI gene (formerly Entrezgene);Acc:835330]
AT5G52840	NA	AT5G52840	NCBI gene (formerly Entrezgene)	NADH-ubiquinone oxidoreductase-like protein [Source:NCBI gene (formerly Entrezgene);Acc:835361]
AT5G52960	NA	AT5G52960	NCBI gene (formerly Entrezgene)	tRNA dimethylallyltransferase [Source:NCBI gene (formerly Entrezgene);Acc:835373]
AT5G53170	FTSH11	FTSH11	NCBI gene (formerly Entrezgene)	FTSH protease 11 [Source:NCBI gene (formerly Entrezgene);Acc:835398]
AT5G53490	NA	AT5G53490	NCBI gene (formerly Entrezgene)	Tetratricopeptide repeat (TPR)-like superfamily protein [Source:NCBI gene (formerly Entrezgene);Acc:835431]
AT5G53860	emb2737;EMB64	emb2737	NCBI gene (formerly Entrezgene)	embryo defective 2737 [Source:NCBI gene (formerly Entrezgene);Acc:835467]
AT5G54200	NA	AT5G54200	NCBI gene (formerly Entrezgene)	Transducin/WD40 repeat-like superfamily protein [Source:NCBI gene (formerly Entrezgene);Acc:835508]
AT5G54270	LHCB3	LHCB3	NCBI gene (formerly Entrezgene)	light-harvesting chlorophyll B-binding protein 3 [Source:NCBI gene (formerly Entrezgene);Acc:835515]
AT5G54600	NA	RPL24	NCBI gene (formerly Entrezgene)	Translation protein SH3-like family protein [Source:NCBI gene (formerly Entrezgene);Acc:835549]
AT5G55480	SVL1	SVL1	NCBI gene (formerly Entrezgene)	SHV3-like 1 [Source:NCBI gene (formerly Entrezgene);Acc:835641]
AT5G55540	TRN1	TRN1	NCBI gene (formerly Entrezgene)	tornado 1 [Source:NCBI gene (formerly Entrezgene);Acc:835648]
AT5G56590	NA	AT5G56590	NCBI gene (formerly Entrezgene)	O-Glycosyl hydrolases family 17 protein [Source:NCBI gene (formerly Entrezgene);Acc:835760]
AT5G56720	NA	c-NAD-MDH3	NCBI gene (formerly Entrezgene)	Lactate/malate dehydrogenase family protein [Source:NCBI gene (formerly Entrezgene);Acc:835773]
AT5G56850	NA	AT5G56850	NCBI gene (formerly Entrezgene)	NA
AT5G57030	LUT2	LUT2	NCBI gene (formerly Entrezgene)	Lycopene beta/epsilon cyclase protein [Source:NCBI gene (formerly Entrezgene);Acc:835806]
AT5G57440	GS1	GS1	NCBI gene (formerly Entrezgene)	Haloacid dehalogenase-like hydrolase (HAD) superfamily protein [Source:NCBI gene (formerly Entrezgene);Acc:835849]
AT5G57700	NA	AT5G57700	NCBI gene (formerly Entrezgene)	BNR/Asp-box repeat family protein [Source:NCBI gene (formerly Entrezgene);Acc:835877]
AT5G57760	NA	AT5G57760	NCBI gene (formerly Entrezgene)	NA
AT5G57785	NA	AT5G57785	NCBI gene (formerly Entrezgene)	NA
AT5G58300	NA	AT5G58300	NCBI gene (formerly Entrezgene)	Leucine-rich repeat protein kinase family protein [Source:NCBI gene (formerly Entrezgene);Acc:835942]
AT5G59613	NA	AT5G59613	NCBI gene (formerly Entrezgene)	ATP synthase [Source:NCBI gene (formerly Entrezgene);Acc:836081]
AT5G59690	NA	AT5G59690	NCBI gene (formerly Entrezgene)	Histone superfamily protein [Source:NCBI gene (formerly Entrezgene);Acc:836090]
AT5G59970	NA	AT5G59970	NCBI gene (formerly Entrezgene)	Histone superfamily protein [Source:NCBI gene (formerly Entrezgene);Acc:836119]
AT5G61130	PDCB1	PDCB1	NCBI gene (formerly Entrezgene)	plasmodesmata callose-binding protein 1 [Source:NCBI gene (formerly Entrezgene);Acc:836234]
AT5G62410	SMC2	SMC2	NCBI gene (formerly Entrezgene)	structural maintenance of chromosomes 2 [Source:NCBI gene (formerly Entrezgene);Acc:836362]
AT5G63180	NA	AT5G63180	NCBI gene (formerly Entrezgene)	Pectin lyase-like superfamily protein [Source:NCBI gene (formerly Entrezgene);Acc:836439]
AT5G63310	NDPK2	NDPK2	NCBI gene (formerly Entrezgene)	nucleoside diphosphate kinase 2 [Source:NCBI gene (formerly Entrezgene);Acc:836451]
AT5G63700	NA	AT5G63700	NCBI gene (formerly Entrezgene)	zinc ion binding / DNA binding protein [Source:NCBI gene (formerly Entrezgene);Acc:836490]
AT5G63780	SHA1	SHA1	NCBI gene (formerly Entrezgene)	RING/FYVE/PHD zinc finger superfamily protein [Source:NCBI gene (formerly Entrezgene);Acc:836498]
AT5G64040	PSAN	PSAN	NCBI gene (formerly Entrezgene)	photosystem I reaction center subunit PSI-N, chloroplast, putative / PSI-N, putative (PSAN) [Source:NCBI gene (formerly Entrezgene);Acc:836525]
AT5G64460	NA	AT5G64460	NCBI gene (formerly Entrezgene)	Phosphoglycerate mutase family protein [Source:NCBI gene (formerly Entrezgene);Acc:836567]
AT5G64630	FAS2	FAS2	NCBI gene (formerly Entrezgene)	Transducin/WD40 repeat-like superfamily protein [Source:NCBI gene (formerly Entrezgene);Acc:836584]
AT5G64940	ATATH13	ATH13	NCBI gene (formerly Entrezgene)	ABC2 homolog 13 [Source:NCBI gene (formerly Entrezgene);Acc:836618]
AT5G65220	NA	AT5G65220	NCBI gene (formerly Entrezgene)	Ribosomal L29 family protein [Source:NCBI gene (formerly Entrezgene);Acc:836647]
AT5G65440	NA	AT5G65440	NCBI gene (formerly Entrezgene)	transmembrane protein [Source:NCBI gene (formerly Entrezgene);Acc:836669]
AT5G65810	NA	CGR3	NCBI gene (formerly Entrezgene)	transmembrane protein [Source:NCBI gene (formerly Entrezgene);Acc:836710]
AT5G66005	NA	AT5G66005	NCBI gene (formerly Entrezgene)	Expressed protein [Source:NCBI gene (formerly Entrezgene);Acc:2746218]
AT5G66410	PLP3b	PLP3b	NCBI gene (formerly Entrezgene)	thioredoxin domain PLP3B-like protein [Source:NCBI gene (formerly Entrezgene);Acc:836773]
AT5G66530	NA	AT5G66530	NCBI gene (formerly Entrezgene)	Galactose mutarotase-like superfamily protein [Source:NCBI gene (formerly Entrezgene);Acc:836785]
AT5G66550	NA	AT5G66550	NCBI gene (formerly Entrezgene)	Maf-like protein [Source:NCBI gene (formerly Entrezgene);Acc:836787]
AT5G66580	NA	AT5G66580	NCBI gene (formerly Entrezgene)	NA
AT5G67200	NA	AT5G67200	NCBI gene (formerly Entrezgene)	Leucine-rich repeat protein kinase family protein [Source:NCBI gene (formerly Entrezgene);Acc:836855]
AT5G67280	RLK	RLK	NCBI gene (formerly Entrezgene)	receptor-like kinase [Source:NCBI gene (formerly Entrezgene);Acc:836863]

## Sheet: 35S.Up&cr.Down GO 
gene ID	GO ID	GO name	GO ontology	GO evidence
AT1G01240	GO:0016020	membrane	CC	IEA
AT1G01240	GO:0003674	molecular_function	MF	ND
AT1G01355	GO:1903231	mRNA base-pairing post-transcriptional repressor activity	MF	IEA
AT1G01355	GO:0016787	hydrolase activity	MF	IEA
AT1G01355	GO:0010468	regulation of gene expression	BP	IEA
AT1G01355	GO:0005777	peroxisome	CC	IEA
AT1G01355	GO:0090305	nucleic acid phosphodiester bond hydrolysis	BP	IEA
AT1G01355	GO:0004519	endonuclease activity	MF	IEA
AT1G01355	GO:0003674	molecular_function	MF	ND
AT1G01355	GO:0035194	post-transcriptional gene silencing by RNA	BP	IEA
AT1G01500	GO:0016020	membrane	CC	IEA
AT1G01500	GO:0005575	cellular_component	CC	ND
AT1G01500	GO:0004617	phosphoglycerate dehydrogenase activity	MF	IBA
AT1G01550	GO:0009507	chloroplast	CC	IEA
AT1G01550	GO:0009536	plastid	CC	IEA
AT1G01550	GO:0048367	shoot system development	BP	IEA
AT1G01550	GO:0048364	root development	BP	IEA
AT1G01550	GO:0009793	embryo development ending in seed dormancy	BP	IGI
AT1G01550	GO:0048364	root development	BP	IMP
AT1G01550	GO:0048367	shoot system development	BP	IMP
AT1G01560	GO:0016740	transferase activity	MF	IEA
AT1G01560	GO:0000166	nucleotide binding	MF	IEA
AT1G01560	GO:0005524	ATP binding	MF	IEA
AT1G01560	GO:0016301	kinase activity	MF	IEA
AT1G01560	GO:0016310	phosphorylation	BP	IEA
AT1G01560	GO:0004672	protein kinase activity	MF	IEA
AT1G01560	GO:0006468	protein phosphorylation	BP	IEA
AT1G01560	GO:0005829	cytosol	CC	HDA
AT1G01560	GO:0004674	protein serine/threonine kinase activity	MF	IEA
AT1G01560	GO:0005515	protein binding	MF	IPI
AT1G01560	GO:0004707	MAP kinase activity	MF	IEA
AT1G01560	GO:0000165	MAPK cascade	BP	IEA
AT1G01560	GO:0005737	cytoplasm	CC	IBA
AT1G01560	GO:0005634	nucleus	CC	IBA
AT1G01560	GO:0004674	protein serine/threonine kinase activity	MF	IBA
AT1G01560	GO:0106310	protein serine kinase activity	MF	IEA
AT1G01560	GO:0009737	response to abscisic acid	BP	IEP
AT1G01560	GO:0035556	intracellular signal transduction	BP	IBA
AT1G01560	GO:0004707	MAP kinase activity	MF	IBA
AT1G01560	GO:0004707	MAP kinase activity	MF	ISS
AT1G02390	GO:0016740	transferase activity	MF	IEA
AT1G02390	GO:0016020	membrane	CC	IEA
AT1G02390	GO:0016746	acyltransferase activity	MF	IEA
AT1G02390	GO:0006629	lipid metabolic process	BP	IEA
AT1G02390	GO:0008654	phospholipid biosynthetic process	BP	IEA
AT1G02390	GO:0016024	CDP-diacylglycerol biosynthetic process	BP	IEA
AT1G02390	GO:0004366	glycerol-3-phosphate O-acyltransferase activity	MF	IEA
AT1G02390	GO:0102420	sn-1-glycerol-3-phosphate C16:0-DCA-CoA acyl transferase activity	MF	IEA
AT1G02390	GO:0016020	membrane	CC	IBA
AT1G02390	GO:0016791	phosphatase activity	MF	IBA
AT1G02390	GO:0090447	glycerol-3-phosphate 2-O-acyltransferase activity	MF	IBA
AT1G02390	GO:0010143	cutin biosynthetic process	BP	IBA
AT1G02460	GO:0016829	lyase activity	MF	IEA
AT1G02460	GO:0016787	hydrolase activity	MF	IEA
AT1G02460	GO:0005975	carbohydrate metabolic process	BP	IEA
AT1G02460	GO:0004650	polygalacturonase activity	MF	IEA
AT1G02460	GO:0016798	hydrolase activity, acting on glycosyl bonds	MF	IEA
AT1G02460	GO:0008152	metabolic process	BP	IEA
AT1G02470	NA	NA	NA	NA
AT1G02610	GO:0004842	ubiquitin-protein transferase activity	MF	IBA
AT1G02610	GO:0016020	membrane	CC	IEA
AT1G02610	GO:0008270	zinc ion binding	MF	IEA
AT1G02610	GO:0016020	membrane	CC	IBA
AT1G02610	GO:0016567	protein ubiquitination	BP	IBA
AT1G02660	GO:0016020	membrane	CC	IEA
AT1G02660	GO:0009507	chloroplast	CC	IEA
AT1G02660	GO:0009536	plastid	CC	IEA
AT1G02660	GO:0016787	hydrolase activity	MF	IEA
AT1G02660	GO:0006629	lipid metabolic process	BP	IEA
AT1G02660	GO:0031969	chloroplast membrane	CC	IEA
AT1G02660	GO:0016042	lipid catabolic process	BP	IEA
AT1G02660	GO:0009570	chloroplast stroma	CC	IEA
AT1G02660	GO:0008970	phospholipase A1 activity	MF	IEA
AT1G02660	GO:0009507	chloroplast	CC	IDA
AT1G02660	GO:0047714	galactolipase activity	MF	IDA
AT1G02660	GO:0047714	galactolipase activity	MF	IEA
AT1G02660	GO:0052739	phosphatidylserine 1-acylhydrolase activity	MF	IEA
AT1G02660	GO:0052740	1-acyl-2-lysophosphatidylserine acylhydrolase activity	MF	IEA
AT1G02660	GO:0102549	1-18:1-2-16:0-monogalactosyldiacylglycerol lipase activity	MF	IEA
AT1G02660	GO:0002213	defense response to insect	BP	IMP
AT1G02660	GO:0031349	positive regulation of defense response	BP	IMP
AT1G02740	GO:0006355	regulation of DNA-templated transcription	BP	IEA
AT1G02740	GO:0005634	nucleus	CC	IDA
AT1G02740	GO:0005634	nucleus	CC	IEA
AT1G02740	GO:0006325	chromatin organization	BP	IEA
AT1G02740	GO:0005515	protein binding	MF	IPI
AT1G02740	GO:0043621	protein self-association	MF	IPI
AT1G02740	GO:0016573	histone acetylation	BP	IBA
AT1G02740	GO:0035064	methylated histone binding	MF	IDA
AT1G02740	GO:0048510	regulation of timing of transition from vegetative to reproductive phase	BP	IMP
AT1G02740	GO:0048586	regulation of long-day photoperiodism, flowering	BP	IGI
AT1G02740	GO:1990188	euchromatin binding	MF	IDA
AT1G02740	GO:1990841	promoter-specific chromatin binding	MF	IPI
AT1G02740	GO:0043967	histone H4 acetylation	BP	IMP
AT1G02740	GO:0000123	histone acetyltransferase complex	CC	IBA
AT1G02850	GO:0016787	hydrolase activity	MF	IEA
AT1G02850	GO:0005975	carbohydrate metabolic process	BP	IEA
AT1G02850	GO:0004553	hydrolase activity, hydrolyzing O-glycosyl compounds	MF	IEA
AT1G02850	GO:0016798	hydrolase activity, acting on glycosyl bonds	MF	IEA
AT1G02850	GO:0008152	metabolic process	BP	IEA
AT1G02850	GO:0008422	beta-glucosidase activity	MF	IEA
AT1G02850	GO:0102483	scopolin beta-glucosidase activity	MF	IEA
AT1G02850	GO:0008422	beta-glucosidase activity	MF	IBA
AT1G03200	GO:0008150	biological_process	BP	ND
AT1G03200	GO:0005575	cellular_component	CC	ND
AT1G03370	GO:0046872	metal ion binding	MF	IEA
AT1G03370	GO:0016020	membrane	CC	IEA
AT1G03370	GO:0003674	molecular_function	MF	ND
AT1G03495	NA	NA	NA	NA
AT1G03550	GO:0005886	plasma membrane	CC	IEA
AT1G03550	GO:0016020	membrane	CC	IEA
AT1G03550	GO:0015031	protein transport	BP	IEA
AT1G03550	GO:0031410	cytoplasmic vesicle	CC	IEA
AT1G03550	GO:0030658	transport vesicle membrane	CC	IEA
AT1G03550	GO:0016021	integral component of membrane	CC	IEA
AT1G03550	GO:0110165	cellular anatomical entity	CC	IEA
AT1G03550	GO:0015031	protein transport	BP	IBA
AT1G03550	GO:0032588	trans-Golgi network membrane	CC	IBA
AT1G03550	GO:0055038	recycling endosome membrane	CC	IBA
AT1G03730	GO:0016020	membrane	CC	IEA
AT1G03740	GO:0016740	transferase activity	MF	IEA
AT1G03740	GO:0000166	nucleotide binding	MF	IEA
AT1G03740	GO:0005524	ATP binding	MF	IEA
AT1G03740	GO:0016301	kinase activity	MF	IEA
AT1G03740	GO:0016310	phosphorylation	BP	IEA
AT1G03740	GO:0004672	protein kinase activity	MF	IEA
AT1G03740	GO:0006468	protein phosphorylation	BP	IEA
AT1G03740	GO:0005634	nucleus	CC	IBA
AT1G03740	GO:0006468	protein phosphorylation	BP	IBA
AT1G03740	GO:0032968	positive regulation of transcription elongation by RNA polymerase II	BP	IBA
AT1G03740	GO:0004693	cyclin-dependent protein serine/threonine kinase activity	MF	IBA
AT1G03740	GO:0051726	regulation of cell cycle	BP	IEA
AT1G03740	GO:0008353	RNA polymerase II CTD heptapeptide repeat kinase activity	MF	IBA
AT1G03740	GO:0070816	phosphorylation of RNA polymerase II C-terminal domain	BP	IBA
AT1G03740	GO:0000307	cyclin-dependent protein kinase holoenzyme complex	CC	IBA
AT1G03740	GO:0005576	extracellular region	CC	HDA
AT1G03940	GO:0016740	transferase activity	MF	IEA
AT1G03940	GO:0016746	acyltransferase activity	MF	IEA
AT1G04070	GO:0016020	membrane	CC	IEA
AT1G04070	GO:0005739	mitochondrion	CC	IEA
AT1G04070	GO:0015031	protein transport	BP	IEA
AT1G04070	GO:0005741	mitochondrial outer membrane	CC	IEA
AT1G04070	GO:0071806	protein transmembrane transport	BP	IEA
AT1G04070	GO:0015450	protein-transporting ATPase activity	MF	ISS
AT1G04070	GO:0006626	protein targeting to mitochondrion	BP	ISS
AT1G04070	GO:0005742	mitochondrial outer membrane translocase complex	CC	ISS
AT1G04280	GO:0005524	ATP binding	MF	IEA
AT1G04280	GO:0016301	kinase activity	MF	IEA
AT1G04280	GO:0016740	transferase activity	MF	IEA
AT1G04280	GO:0016020	membrane	CC	IEA
AT1G04280	GO:0000166	nucleotide binding	MF	IEA
AT1G04280	GO:0005739	mitochondrion	CC	IEA
AT1G04280	GO:0016310	phosphorylation	BP	IEA
AT1G04280	GO:0005741	mitochondrial outer membrane	CC	IEA
AT1G04280	GO:0005516	calmodulin binding	MF	IEA
AT1G04280	GO:0003951	NAD+ kinase activity	MF	IEA
AT1G04280	GO:0005516	calmodulin binding	MF	IDA
AT1G04280	GO:0003951	NAD+ kinase activity	MF	IDA
AT1G04280	GO:0006741	NADP biosynthetic process	BP	IDA
AT1G04280	GO:0005741	mitochondrial outer membrane	CC	IDA
AT1G04400	GO:0046872	metal ion binding	MF	IEA
AT1G04400	GO:0000166	nucleotide binding	MF	IEA
AT1G04400	GO:0005524	ATP binding	MF	IDA
AT1G04400	GO:0005524	ATP binding	MF	IEA
AT1G04400	GO:0005634	nucleus	CC	IDA
AT1G04400	GO:0005634	nucleus	CC	IEA
AT1G04400	GO:0006952	defense response	BP	IEA
AT1G04400	GO:0005737	cytoplasm	CC	IDA
AT1G04400	GO:0005737	cytoplasm	CC	IEA
AT1G04400	GO:0005515	protein binding	MF	IPI
AT1G04400	GO:0009881	photoreceptor activity	MF	IEA
AT1G04400	GO:0050896	response to stimulus	BP	IEA
AT1G04400	GO:0009882	blue light photoreceptor activity	MF	IEA
AT1G04400	GO:0009785	blue light signaling pathway	BP	IEA
AT1G04400	GO:0006325	chromatin organization	BP	IEA
AT1G04400	GO:0005737	cytoplasm	CC	IBA
AT1G04400	GO:0005634	nucleus	CC	IBA
AT1G04400	GO:0042802	identical protein binding	MF	IPI
AT1G04400	GO:0003677	DNA binding	MF	IBA
AT1G04400	GO:1901371	regulation of leaf morphogenesis	BP	IMP
AT1G04400	GO:0009414	response to water deprivation	BP	IGI
AT1G04400	GO:0009416	response to light stimulus	BP	IMP
AT1G04400	GO:0042803	protein homodimerization activity	MF	IPI
AT1G04400	GO:0009909	regulation of flower development	BP	IDA
AT1G04400	GO:0009637	response to blue light	BP	IMP
AT1G04400	GO:0010075	regulation of meristem growth	BP	IGI
AT1G04400	GO:0010118	stomatal movement	BP	IGI
AT1G04400	GO:0009911	positive regulation of flower development	BP	IMP
AT1G04400	GO:0051607	defense response to virus	BP	IMP
AT1G04400	GO:0000325	plant-type vacuole	CC	HDA
AT1G04400	GO:0007623	circadian rhythm	BP	IEP
AT1G04400	GO:0048574	long-day photoperiodism, flowering	BP	IMP
AT1G04400	GO:0016604	nuclear body	CC	IDA
AT1G04400	GO:0016604	nuclear body	CC	IMP
AT1G04400	GO:0009637	response to blue light	BP	IDA
AT1G04400	GO:0009637	response to blue light	BP	IEP
AT1G04400	GO:0009416	response to light stimulus	BP	IEP
AT1G04400	GO:0009638	phototropism	BP	IMP
AT1G04400	GO:0006338	chromatin remodeling	BP	IMP
AT1G04400	GO:2000028	regulation of photoperiodism, flowering	BP	IDA
AT1G04400	GO:0009882	blue light photoreceptor activity	MF	ISS
AT1G04400	GO:0009646	response to absence of light	BP	IEP
AT1G04400	GO:0071949	FAD binding	MF	IBA
AT1G04400	GO:0032922	circadian regulation of gene expression	BP	IBA
AT1G04400	GO:0043153	entrainment of circadian clock by photoperiod	BP	IBA
AT1G04400	GO:0006325	chromatin organization	BP	IMP
AT1G04400	GO:0042752	regulation of circadian rhythm	BP	IMP
AT1G04400	GO:0071949	FAD binding	MF	IDA
AT1G04400	GO:0010244	response to low fluence blue light stimulus by blue low-fluence system	BP	IEP
AT1G04400	GO:0010244	response to low fluence blue light stimulus by blue low-fluence system	BP	IMP
AT1G04400	GO:0010617	circadian regulation of calcium ion oscillation	BP	IMP
AT1G04400	GO:0009785	blue light signaling pathway	BP	IGI
AT1G04400	GO:0016605	PML body	CC	IEA
AT1G04400	GO:0072387	flavin adenine dinucleotide metabolic process	BP	IMP
AT1G04400	GO:1902347	response to strigolactone	BP	IMP
AT1G04400	GO:2000379	positive regulation of reactive oxygen species metabolic process	BP	IDA
AT1G04400	GO:0003904	deoxyribodipyrimidine photo-lyase activity	MF	IBA
AT1G04400	GO:0006950	response to stress	BP	IEA
AT1G04400	GO:0006139	nucleobase-containing compound metabolic process	BP	IEA
AT1G04400	GO:0097159	organic cyclic compound binding	MF	IEA
AT1G04400	GO:1901363	heterocyclic compound binding	MF	IEA
AT1G04400	GO:0051716	cellular response to stimulus	BP	IEA
AT1G04570	GO:0016020	membrane	CC	IEA
AT1G04570	GO:0016021	integral component of membrane	CC	IEA
AT1G04570	GO:0009507	chloroplast	CC	IEA
AT1G04570	GO:0009536	plastid	CC	IEA
AT1G04570	GO:0031969	chloroplast membrane	CC	IEA
AT1G04570	GO:0003674	molecular_function	MF	ND
AT1G04570	GO:0005575	cellular_component	CC	ND
AT1G04970	GO:0005615	extracellular space	CC	IEA
AT1G04970	GO:0008289	lipid binding	MF	IEA
AT1G04970	GO:0010468	regulation of gene expression	BP	IMP
AT1G04970	GO:0000325	plant-type vacuole	CC	HDA
AT1G04970	GO:0001530	lipopolysaccharide binding	MF	IDA
AT1G04970	GO:1903409	reactive oxygen species biosynthetic process	BP	IMP
AT1G05060	GO:0008150	biological_process	BP	ND
AT1G05570	GO:0016757	glycosyltransferase activity	MF	IEA
AT1G05570	GO:0016740	transferase activity	MF	IEA
AT1G05570	GO:0071555	cell wall organization	BP	IEA
AT1G05570	GO:0005886	plasma membrane	CC	IEA
AT1G05570	GO:0016020	membrane	CC	IEA
AT1G05570	GO:0003843	1,3-beta-D-glucan synthase activity	MF	IEA
AT1G05570	GO:0006075	(1->3)-beta-D-glucan biosynthetic process	BP	IEA
AT1G05570	GO:0000148	1,3-beta-D-glucan synthase complex	CC	IEA
AT1G05570	GO:0005886	plasma membrane	CC	IBA
AT1G05570	GO:0008360	regulation of cell shape	BP	IEA
AT1G05570	GO:0009506	plasmodesma	CC	HDA
AT1G05570	GO:0009504	cell plate	CC	IDA
AT1G05570	GO:0046527	glucosyltransferase activity	MF	IBA
AT1G05575	GO:0005783	endoplasmic reticulum	CC	IDA
AT1G05575	GO:0009061	anaerobic respiration	BP	IEP
AT1G05575	GO:0009061	anaerobic respiration	BP	IMP
AT1G05783	NA	NA	NA	NA
AT1G06050	GO:0003674	molecular_function	MF	ND
AT1G06780	GO:0016757	glycosyltransferase activity	MF	IEA
AT1G06780	GO:0016740	transferase activity	MF	IEA
AT1G06780	GO:0071555	cell wall organization	BP	IEA
AT1G06780	GO:0016020	membrane	CC	IEA
AT1G06780	GO:0005794	Golgi apparatus	CC	IEA
AT1G06780	GO:0047262	polygalacturonate 4-alpha-galacturonosyltransferase activity	MF	IEA
AT1G06780	GO:0045489	pectin biosynthetic process	BP	IEA
AT1G06780	GO:0000139	Golgi membrane	CC	IEA
AT1G06780	GO:0005794	Golgi apparatus	CC	IDA
AT1G06780	GO:0047262	polygalacturonate 4-alpha-galacturonosyltransferase activity	MF	ISS
AT1G07000	GO:0000145	exocyst	CC	IEA
AT1G07000	GO:0005634	nucleus	CC	IDA
AT1G07000	GO:0005634	nucleus	CC	IEA
AT1G07000	GO:0006952	defense response	BP	IEA
AT1G07000	GO:0005829	cytosol	CC	IDA
AT1G07000	GO:0006887	exocytosis	BP	IEA
AT1G07000	GO:0005737	cytoplasm	CC	IDA
AT1G07000	GO:0005737	cytoplasm	CC	IEA
AT1G07000	GO:0015031	protein transport	BP	IEA
AT1G07000	GO:0042545	cell wall modification	BP	IMP
AT1G07000	GO:0031410	cytoplasmic vesicle	CC	IEA
AT1G07000	GO:0005515	protein binding	MF	IPI
AT1G07000	GO:0005546	phosphatidylinositol-4,5-bisphosphate binding	MF	IEA
AT1G07000	GO:0009617	response to bacterium	BP	TAS
AT1G07000	GO:0005886	plasma membrane	CC	HDA
AT1G07000	GO:0002238	response to molecule of fungal origin	BP	IMP
AT1G07000	GO:0009620	response to fungus	BP	TAS
AT1G07000	GO:0043621	protein self-association	MF	IDA
AT1G07000	GO:0090333	regulation of stomatal closure	BP	IMP
AT1G07000	GO:0002237	response to molecule of bacterial origin	BP	IEP
AT1G07000	GO:0002237	response to molecule of bacterial origin	BP	IMP
AT1G07000	GO:0006887	exocytosis	BP	IBA
AT1G07000	GO:0000145	exocyst	CC	IBA
AT1G07000	GO:1900426	positive regulation of defense response to bacterium	BP	IMP
AT1G07000	GO:1902290	positive regulation of defense response to oomycetes	BP	IMP
AT1G07000	GO:1900150	regulation of defense response to fungus	BP	IMP
AT1G07000	GO:0009414	response to water deprivation	BP	IMP
AT1G07000	GO:0070062	extracellular exosome	CC	IDA
AT1G07000	GO:0045335	phagocytic vesicle	CC	IEA
AT1G07135	GO:0071456	cellular response to hypoxia	BP	HEP
AT1G07530	GO:0005634	nucleus	CC	IEA
AT1G07530	GO:0005634	nucleus	CC	IDA
AT1G07530	GO:0005829	cytosol	CC	IDA
AT1G07530	GO:0005515	protein binding	MF	IPI
AT1G07530	GO:0005634	nucleus	CC	IBA
AT1G07530	GO:0006355	regulation of DNA-templated transcription	BP	IBA
AT1G07530	GO:0043565	sequence-specific DNA binding	MF	IBA
AT1G07530	GO:0003700	DNA-binding transcription factor activity	MF	ISS
AT1G07530	GO:0003700	DNA-binding transcription factor activity	MF	IBA
AT1G07530	GO:0006355	regulation of DNA-templated transcription	BP	TAS
AT1G07530	GO:0000976	transcription cis-regulatory region binding	MF	IPI
AT1G07530	GO:0045893	positive regulation of DNA-templated transcription	BP	IMP
AT1G07530	GO:0009410	response to xenobiotic stimulus	BP	IMP
AT1G07530	GO:0080183	response to photooxidative stress	BP	IMP
AT1G07620	GO:0003674	molecular_function	MF	ND
AT1G07620	NA	NA	NA	NA
AT1G07630	GO:0046872	metal ion binding	MF	IEA
AT1G07630	GO:0016787	hydrolase activity	MF	IEA
AT1G07630	GO:0005634	nucleus	CC	IEA
AT1G07630	GO:0004721	phosphoprotein phosphatase activity	MF	IEA
AT1G07630	GO:0004722	protein serine/threonine phosphatase activity	MF	IEA
AT1G07630	GO:0006470	protein dephosphorylation	BP	IEA
AT1G07630	GO:0048366	leaf development	BP	IMP
AT1G07630	GO:0006470	protein dephosphorylation	BP	IBA
AT1G07630	GO:0017018	myosin phosphatase activity	MF	IEA
AT1G07900	GO:0005739	mitochondrion	CC	HDA
AT1G08620	GO:0046872	metal ion binding	MF	IEA
AT1G08620	GO:0016491	oxidoreductase activity	MF	IEA
AT1G08620	GO:0005634	nucleus	CC	IDA
AT1G08620	GO:0005634	nucleus	CC	IEA
AT1G08620	GO:0006355	regulation of DNA-templated transcription	BP	IEA
AT1G08620	GO:0051213	dioxygenase activity	MF	IEA
AT1G08620	GO:0051321	meiotic cell cycle	BP	IEA
AT1G08620	GO:0006325	chromatin organization	BP	IEA
AT1G08620	GO:0005515	protein binding	MF	IPI
AT1G08620	GO:0005634	nucleus	CC	IBA
AT1G08620	GO:0006338	chromatin remodeling	BP	IBA
AT1G08620	GO:0032452	histone demethylase activity	MF	IBA
AT1G08620	GO:0034647	histone H3-tri/di/monomethyl-lysine-4 demethylase activity	MF	IBA
AT1G08620	GO:0010032	meiotic chromosome condensation	BP	IMP
AT1G08620	GO:0006338	chromatin remodeling	BP	IMP
AT1G08620	GO:0006355	regulation of DNA-templated transcription	BP	TAS
AT1G08620	GO:1900056	negative regulation of leaf senescence	BP	IMP
AT1G08620	GO:0045814	negative regulation of gene expression, epigenetic	BP	IDA
AT1G08620	GO:0045814	negative regulation of gene expression, epigenetic	BP	IMP
AT1G08620	GO:0099402	plant organ development	BP	IMP
AT1G08620	GO:0034647	histone H3-tri/di/monomethyl-lysine-4 demethylase activity	MF	IDA
AT1G08620	GO:0034647	histone H3-tri/di/monomethyl-lysine-4 demethylase activity	MF	IMP
AT1G08620	GO:0048589	developmental growth	BP	IMP
AT1G08620	GO:0034720	histone H3-K4 demethylation	BP	IDA
AT1G08620	GO:0034720	histone H3-K4 demethylation	BP	IMP
AT1G08620	GO:0010628	positive regulation of gene expression	BP	IMP
AT1G08620	GO:0032454	histone H3-methyl-lysine-9 demethylase activity	MF	IDA
AT1G08620	GO:0022414	reproductive process	BP	IEA
AT1G08620	GO:0048731	system development	BP	IEA
AT1G08620	GO:1903409	reactive oxygen species biosynthetic process	BP	IMP
AT1G08620	GO:1905821	positive regulation of chromosome condensation	BP	IMP
AT1G08620	GO:0032183	SUMO binding	MF	IPI
AT1G08620	GO:0033169	histone H3-K9 demethylation	BP	IDA
AT1G08620	GO:0032453	histone H3-methyl-lysine-4 demethylase activity	MF	IEA
AT1G08620	GO:0016570	histone modification	BP	IEA
AT1G09230	GO:0003676	nucleic acid binding	MF	IEA
AT1G09230	GO:0003723	RNA binding	MF	IEA
AT1G09230	GO:0005634	nucleus	CC	IEA
AT1G09230	GO:0005515	protein binding	MF	IEA
AT1G09230	GO:1990904	ribonucleoprotein complex	CC	IEA
AT1G09230	GO:0005634	nucleus	CC	IDA
AT1G09230	GO:0006397	mRNA processing	BP	IEA
AT1G09230	GO:0008380	RNA splicing	BP	IEA
AT1G09230	GO:0005681	spliceosomal complex	CC	IEA
AT1G09230	GO:0000398	mRNA splicing, via spliceosome	BP	IDA
AT1G09230	GO:0000398	mRNA splicing, via spliceosome	BP	IBA
AT1G09230	GO:0005689	U12-type spliceosomal complex	CC	IBA
AT1G09230	GO:0000398	mRNA splicing, via spliceosome	BP	IMP
AT1G09230	GO:0010229	inflorescence development	BP	IMP
AT1G09230	GO:0030626	U12 snRNA binding	MF	IBA
AT1G09230	GO:0030626	U12 snRNA binding	MF	IDA
AT1G09230	GO:0097157	pre-mRNA intronic binding	MF	IBA
AT1G09230	GO:0097157	pre-mRNA intronic binding	MF	IDA
AT1G09230	GO:0005689	U12-type spliceosomal complex	CC	NAS
AT1G09480	GO:0005575	cellular_component	CC	ND
AT1G09480	GO:0016616	oxidoreductase activity, acting on the CH-OH group of donors, NAD or NADP as acceptor	MF	IBA
AT1G09480	GO:0004022	alcohol dehydrogenase (NAD+) activity	MF	ISS
AT1G09480	NA	NA	NA	NA
AT1G09560	GO:0046872	metal ion binding	MF	IEA
AT1G09560	GO:0005576	extracellular region	CC	IEA
AT1G09560	GO:0005634	nucleus	CC	HDA
AT1G09560	GO:0048046	apoplast	CC	IEA
AT1G09560	GO:0030145	manganese ion binding	MF	IEA
AT1G09560	GO:0009506	plasmodesma	CC	IBA
AT1G09560	GO:2000280	regulation of root development	BP	IBA
AT1G09560	GO:0009506	plasmodesma	CC	IDA
AT1G09560	GO:0010497	plasmodesmata-mediated intercellular transport	BP	IMP
AT1G09560	GO:2000280	regulation of root development	BP	IMP
AT1G09560	GO:0010497	plasmodesmata-mediated intercellular transport	BP	IBA
AT1G09645	GO:0016020	membrane	CC	IEA
AT1G09645	GO:0008150	biological_process	BP	ND
AT1G10140	GO:0005575	cellular_component	CC	ND
AT1G10140	GO:0071456	cellular response to hypoxia	BP	HEP
AT1G10150	GO:0016020	membrane	CC	IEA
AT1G10150	GO:0030246	carbohydrate binding	MF	ISS
AT1G11210	GO:0016020	membrane	CC	IEA
AT1G11210	GO:0003674	molecular_function	MF	ND
AT1G11210	GO:0006979	response to oxidative stress	BP	IMP
AT1G12220	GO:0005886	plasma membrane	CC	IEA
AT1G12220	GO:0016020	membrane	CC	IEA
AT1G12220	GO:0000166	nucleotide binding	MF	IEA
AT1G12220	GO:0005524	ATP binding	MF	IEA
AT1G12220	GO:0043531	ADP binding	MF	IEA
AT1G12220	GO:0006952	defense response	BP	IEA
AT1G12220	GO:0005515	protein binding	MF	IPI
AT1G12220	GO:0042802	identical protein binding	MF	IPI
AT1G12220	GO:0009626	plant-type hypersensitive response	BP	IEA
AT1G12220	GO:0005515	protein binding	MF	IEA
AT1G12220	GO:0005886	plasma membrane	CC	IDA
AT1G12220	GO:0006952	defense response	BP	IMP
AT1G12220	GO:0006952	defense response	BP	TAS
AT1G12220	GO:0042742	defense response to bacterium	BP	IDA
AT1G12220	GO:0009626	plant-type hypersensitive response	BP	IMP
AT1G12220	GO:0008219	cell death	BP	IMP
AT1G12220	GO:0000166	nucleotide binding	MF	IMP
AT1G12220	GO:0038023	signaling receptor activity	MF	IMP
AT1G12290	GO:0000166	nucleotide binding	MF	IEA
AT1G12290	GO:0005524	ATP binding	MF	IEA
AT1G12290	GO:0043531	ADP binding	MF	IEA
AT1G12290	GO:0006952	defense response	BP	IEA
AT1G12290	GO:0005515	protein binding	MF	IEA
AT1G12290	GO:0005886	plasma membrane	CC	IDA
AT1G12290	GO:0010942	positive regulation of cell death	BP	IMP
AT1G12360	GO:0016020	membrane	CC	IEA
AT1G12360	GO:0005829	cytosol	CC	IDA
AT1G12360	GO:0005737	cytoplasm	CC	IEA
AT1G12360	GO:0015031	protein transport	BP	IEA
AT1G12360	GO:0005515	protein binding	MF	IPI
AT1G12360	GO:0016192	vesicle-mediated transport	BP	IEA
AT1G12360	GO:0007049	cell cycle	BP	IEA
AT1G12360	GO:0005856	cytoskeleton	CC	IEA
AT1G12360	GO:0051301	cell division	BP	IEA
AT1G12360	GO:0005886	plasma membrane	CC	IBA
AT1G12360	GO:0006886	intracellular protein transport	BP	IBA
AT1G12360	GO:0009524	phragmoplast	CC	IEA
AT1G12360	GO:0016192	vesicle-mediated transport	BP	IBA
AT1G12360	GO:0000911	cytokinesis by cell plate formation	BP	IMP
AT1G12360	GO:0000325	plant-type vacuole	CC	HDA
AT1G12360	GO:0006904	vesicle docking involved in exocytosis	BP	IBA
AT1G12360	GO:0019898	extrinsic component of membrane	CC	IDA
AT1G12360	GO:0019905	syntaxin binding	MF	IBA
AT1G12360	GO:0030141	secretory granule	CC	IBA
AT1G12450	GO:0016020	membrane	CC	IEA
AT1G12450	GO:0003674	molecular_function	MF	ND
AT1G12940	GO:0005886	plasma membrane	CC	IEA
AT1G12940	GO:0016020	membrane	CC	IEA
AT1G12940	GO:0022857	transmembrane transporter activity	MF	IEA
AT1G12940	GO:0055085	transmembrane transport	BP	IEA
AT1G12940	GO:0042128	nitrate assimilation	BP	IEA
AT1G12940	GO:0005886	plasma membrane	CC	IBA
AT1G12940	GO:0015112	nitrate transmembrane transporter activity	MF	IEA
AT1G12940	GO:0015706	nitrate transmembrane transport	BP	IEA
AT1G12940	GO:0009705	plant-type vacuole membrane	CC	IBA
AT1G12940	GO:0015112	nitrate transmembrane transporter activity	MF	IBA
AT1G12940	GO:0015706	nitrate transmembrane transport	BP	IBA
AT1G12940	GO:0071249	cellular response to nitrate	BP	IBA
AT1G12970	GO:0005515	protein binding	MF	IEA
AT1G12970	GO:0005575	cellular_component	CC	ND
AT1G12970	GO:0004674	protein serine/threonine kinase activity	MF	HDA
AT1G12970	GO:0046777	protein autophosphorylation	BP	HDA
AT1G12970	GO:0055046	microgametogenesis	BP	IGI
AT1G12990	GO:0016740	transferase activity	MF	IEA
AT1G12990	GO:0016020	membrane	CC	IEA
AT1G12990	GO:0003830	beta-1,4-mannosylglycoprotein 4-beta-N-acetylglucosaminyltransferase activity	MF	IEA
AT1G12990	GO:0006487	protein N-linked glycosylation	BP	IEA
AT1G12990	GO:0016757	glycosyltransferase activity	MF	IBA
AT1G12990	GO:0006044	N-acetylglucosamine metabolic process	BP	IBA
AT1G13210	GO:0046872	metal ion binding	MF	IEA
AT1G13210	GO:0016020	membrane	CC	IEA
AT1G13210	GO:0000287	magnesium ion binding	MF	IEA
AT1G13210	GO:0000166	nucleotide binding	MF	IEA
AT1G13210	GO:0005524	ATP binding	MF	IEA
AT1G13210	GO:0016887	ATP hydrolysis activity	MF	IEA
AT1G13210	GO:0015914	phospholipid transport	BP	IEA
AT1G13210	GO:0005886	plasma membrane	CC	IBA
AT1G13210	GO:0016021	integral component of membrane	CC	IEA
AT1G13210	GO:0140326	ATPase-coupled intramembrane lipid transporter activity	MF	IEA
AT1G13210	GO:0005215	transporter activity	MF	IEA
AT1G13210	GO:1901703	protein localization involved in auxin polar transport	BP	IGI
AT1G13210	GO:0140326	ATPase-coupled intramembrane lipid transporter activity	MF	IBA
AT1G13210	GO:0045332	phospholipid translocation	BP	IBA
AT1G13260	GO:0006355	regulation of DNA-templated transcription	BP	IEA
AT1G13260	GO:0003677	DNA binding	MF	IEA
AT1G13260	GO:0005634	nucleus	CC	IEA
AT1G13260	GO:0003700	DNA-binding transcription factor activity	MF	IEA
AT1G13260	GO:0005634	nucleus	CC	HDA
AT1G13260	GO:0009873	ethylene-activated signaling pathway	BP	IEA
AT1G13260	GO:0003700	DNA-binding transcription factor activity	MF	ISS
AT1G13260	GO:0000976	transcription cis-regulatory region binding	MF	IPI
AT1G13260	GO:0003677	DNA binding	MF	IDA
AT1G13260	GO:0048527	lateral root development	BP	IMP
AT1G13260	GO:0009910	negative regulation of flower development	BP	IMP
AT1G13260	GO:0071456	cellular response to hypoxia	BP	HEP
AT1G13260	GO:0045892	negative regulation of DNA-templated transcription	BP	IDA
AT1G13260	GO:0048366	leaf development	BP	IMP
AT1G13260	GO:0009741	response to brassinosteroid	BP	IEP
AT1G13520	GO:0005575	cellular_component	CC	ND
AT1G13830	NA	NA	NA	NA
AT1G14200	GO:0005737	cytoplasm	CC	IBA
AT1G14200	GO:0061630	ubiquitin protein ligase activity	MF	IBA
AT1G14200	GO:0016567	protein ubiquitination	BP	IBA
AT1G14200	GO:0071456	cellular response to hypoxia	BP	HEP
AT1G14200	GO:0098542	defense response to other organism	BP	IEP
AT1G14370	GO:0016740	transferase activity	MF	IEA
AT1G14370	GO:0005886	plasma membrane	CC	IEA
AT1G14370	GO:0016020	membrane	CC	IEA
AT1G14370	GO:0000166	nucleotide binding	MF	IEA
AT1G14370	GO:0005524	ATP binding	MF	IEA
AT1G14370	GO:0005634	nucleus	CC	IEA
AT1G14370	GO:0016301	kinase activity	MF	IEA
AT1G14370	GO:0016310	phosphorylation	BP	IEA
AT1G14370	GO:0004672	protein kinase activity	MF	IEA
AT1G14370	GO:0006468	protein phosphorylation	BP	IEA
AT1G14370	GO:0006952	defense response	BP	IEA
AT1G14370	GO:0004674	protein serine/threonine kinase activity	MF	IEA
AT1G14370	GO:0005515	protein binding	MF	IPI
AT1G14370	GO:0106310	protein serine kinase activity	MF	IEA
AT1G14370	GO:0005886	plasma membrane	CC	IDA
AT1G14370	GO:1900426	positive regulation of defense response to bacterium	BP	IMP
AT1G14370	GO:0030957	Tat protein binding	MF	IPI
AT1G14400	GO:0016740	transferase activity	MF	IEA
AT1G14400	GO:0000166	nucleotide binding	MF	IEA
AT1G14400	GO:0005524	ATP binding	MF	IEA
AT1G14400	GO:0005829	cytosol	CC	HDA
AT1G14400	GO:0016567	protein ubiquitination	BP	IEA
AT1G14400	GO:0043161	proteasome-mediated ubiquitin-dependent protein catabolic process	BP	IBA
AT1G14400	GO:0006281	DNA repair	BP	IBA
AT1G14400	GO:0061631	ubiquitin conjugating enzyme activity	MF	IEA
AT1G14400	GO:0010228	vegetative to reproductive phase transition of meristem	BP	IGI
AT1G14400	GO:0004842	ubiquitin-protein transferase activity	MF	IDA
AT1G14400	GO:0061631	ubiquitin conjugating enzyme activity	MF	IBA
AT1G14400	GO:0000209	protein polyubiquitination	BP	IBA
AT1G14400	GO:0006511	ubiquitin-dependent protein catabolic process	BP	IDA
AT1G14400	GO:0016574	histone ubiquitination	BP	IBA
AT1G14400	GO:0033523	histone H2B ubiquitination	BP	IGI
AT1G14870	GO:0016020	membrane	CC	IEA
AT1G14870	GO:0005886	plasma membrane	CC	IEA
AT1G14870	GO:0005886	plasma membrane	CC	HDA
AT1G14870	GO:0005886	plasma membrane	CC	IDA
AT1G14870	GO:0006979	response to oxidative stress	BP	IMP
AT1G15530	GO:0007178	transmembrane receptor protein serine/threonine kinase signaling pathway	BP	IEA
AT1G15530	GO:0016740	transferase activity	MF	IEA
AT1G15530	GO:0005886	plasma membrane	CC	IEA
AT1G15530	GO:0016020	membrane	CC	IEA
AT1G15530	GO:0000166	nucleotide binding	MF	IEA
AT1G15530	GO:0005524	ATP binding	MF	IEA
AT1G15530	GO:0016301	kinase activity	MF	IEA
AT1G15530	GO:0016310	phosphorylation	BP	IEA
AT1G15530	GO:0030246	carbohydrate binding	MF	IEA
AT1G15530	GO:0004672	protein kinase activity	MF	IEA
AT1G15530	GO:0006468	protein phosphorylation	BP	IEA
AT1G15530	GO:0006952	defense response	BP	IEA
AT1G15530	GO:0004674	protein serine/threonine kinase activity	MF	IEA
AT1G15530	GO:0050896	response to stimulus	BP	IEA
AT1G15530	GO:0005886	plasma membrane	CC	IBA
AT1G15530	GO:0106310	protein serine kinase activity	MF	IEA
AT1G15530	GO:0005886	plasma membrane	CC	HDA
AT1G15530	GO:0042742	defense response to bacterium	BP	IMP
AT1G15530	GO:0000325	plant-type vacuole	CC	HDA
AT1G15530	GO:0002229	defense response to oomycetes	BP	IMP
AT1G15530	GO:0004675	transmembrane receptor protein serine/threonine kinase activity	MF	IBA
AT1G15530	GO:0002229	defense response to oomycetes	BP	IBA
AT1G15530	GO:0042742	defense response to bacterium	BP	IBA
AT1G15780	GO:0006355	regulation of DNA-templated transcription	BP	IEA
AT1G15780	GO:0005634	nucleus	CC	IEA
AT1G15780	GO:0003713	transcription coactivator activity	MF	IEA
AT1G15780	GO:0003712	transcription coregulator activity	MF	IEA
AT1G15780	GO:0031490	chromatin DNA binding	MF	IEA
AT1G15780	GO:0045893	positive regulation of DNA-templated transcription	BP	IEA
AT1G15780	GO:0006351	DNA-templated transcription	BP	IEA
AT1G15780	GO:0005634	nucleus	CC	IDA
AT1G15780	GO:0005634	nucleus	CC	IPI
AT1G15780	GO:0005515	protein binding	MF	IPI
AT1G15780	GO:0031490	chromatin DNA binding	MF	IBA
AT1G15780	GO:0016592	mediator complex	CC	IDA
AT1G15780	GO:0045723	positive regulation of fatty acid biosynthetic process	BP	IMP
AT1G15780	GO:0009751	response to salicylic acid	BP	IMP
AT1G15780	GO:0031490	chromatin DNA binding	MF	IDA
AT1G15780	GO:0003713	transcription coactivator activity	MF	IDA
AT1G15890	GO:0000166	nucleotide binding	MF	IEA
AT1G15890	GO:0005524	ATP binding	MF	IEA
AT1G15890	GO:0043531	ADP binding	MF	IEA
AT1G15890	GO:0006952	defense response	BP	IEA
AT1G15890	GO:0005515	protein binding	MF	IEA
AT1G16110	GO:0030247	polysaccharide binding	MF	IEA
AT1G16110	GO:0016740	transferase activity	MF	IEA
AT1G16110	GO:0016020	membrane	CC	IEA
AT1G16110	GO:0000166	nucleotide binding	MF	IEA
AT1G16110	GO:0005524	ATP binding	MF	IEA
AT1G16110	GO:0016301	kinase activity	MF	IEA
AT1G16110	GO:0016310	phosphorylation	BP	IEA
AT1G16110	GO:0007166	cell surface receptor signaling pathway	BP	IEA
AT1G16110	GO:0004672	protein kinase activity	MF	IEA
AT1G16110	GO:0006468	protein phosphorylation	BP	IEA
AT1G16110	GO:0004674	protein serine/threonine kinase activity	MF	IEA
AT1G16110	GO:0005886	plasma membrane	CC	IBA
AT1G16110	GO:0016021	integral component of membrane	CC	IEA
AT1G16110	GO:0007166	cell surface receptor signaling pathway	BP	IBA
AT1G16110	GO:0106310	protein serine kinase activity	MF	IEA
AT1G16110	GO:0009505	plant-type cell wall	CC	IDA
AT1G16540	GO:0016740	transferase activity	MF	IEA
AT1G16540	GO:0003824	catalytic activity	MF	IEA
AT1G16540	GO:0016829	lyase activity	MF	IEA
AT1G16540	GO:0030170	pyridoxal phosphate binding	MF	IEA
AT1G16540	GO:0006777	Mo-molybdopterin cofactor biosynthetic process	BP	IEA
AT1G16540	GO:0030151	molybdenum ion binding	MF	IEA
AT1G16540	GO:0008265	Mo-molybdopterin cofactor sulfurase activity	MF	IEA
AT1G16540	GO:0102867	molybdenum cofactor sulfurtransferase activity	MF	IEA
AT1G16540	GO:0009409	response to cold	BP	IMP
AT1G16540	GO:0009651	response to salt stress	BP	IMP
AT1G16540	GO:0042742	defense response to bacterium	BP	IMP
AT1G16540	GO:0006970	response to osmotic stress	BP	IMP
AT1G16540	GO:0009749	response to glucose	BP	IMP
AT1G16540	GO:0010182	sugar mediated signaling pathway	BP	TAS
AT1G16540	GO:0005575	cellular_component	CC	ND
AT1G16540	GO:0045037	protein import into chloroplast stroma	BP	IMP
AT1G16540	GO:0009734	auxin-activated signaling pathway	BP	IMP
AT1G16540	GO:0009408	response to heat	BP	IMP
AT1G16540	GO:0010118	stomatal movement	BP	IMP
AT1G16540	GO:0009688	abscisic acid biosynthetic process	BP	IMP
AT1G16540	GO:0009000	selenocysteine lyase activity	MF	IDA
AT1G16540	GO:0008265	Mo-molybdopterin cofactor sulfurase activity	MF	IDA
AT1G16540	GO:0018315	molybdenum incorporation into molybdenum-molybdopterin complex	BP	IDA
AT1G16540	GO:1901564	organonitrogen compound metabolic process	BP	IEA
AT1G16540	GO:0032787	monocarboxylic acid metabolic process	BP	IEA
AT1G16670	GO:0016740	transferase activity	MF	IEA
AT1G16670	GO:0005886	plasma membrane	CC	IDA
AT1G16670	GO:0005886	plasma membrane	CC	IEA
AT1G16670	GO:0016020	membrane	CC	IEA
AT1G16670	GO:0000166	nucleotide binding	MF	IEA
AT1G16670	GO:0005524	ATP binding	MF	IEA
AT1G16670	GO:0016301	kinase activity	MF	IEA
AT1G16670	GO:0016310	phosphorylation	BP	IEA
AT1G16670	GO:0004672	protein kinase activity	MF	IEA
AT1G16670	GO:0006468	protein phosphorylation	BP	IEA
AT1G16670	GO:0005634	nucleus	CC	HDA
AT1G16670	GO:0004674	protein serine/threonine kinase activity	MF	IDA
AT1G16670	GO:0004674	protein serine/threonine kinase activity	MF	IEA
AT1G16670	GO:0005515	protein binding	MF	IPI
AT1G16670	GO:0004674	protein serine/threonine kinase activity	MF	IBA
AT1G16670	GO:0005886	plasma membrane	CC	IBA
AT1G16670	GO:0106310	protein serine kinase activity	MF	IEA
AT1G16670	GO:0009409	response to cold	BP	IMP
AT1G16670	GO:0002237	response to molecule of bacterial origin	BP	IEP
AT1G16670	GO:0004674	protein serine/threonine kinase activity	MF	HDA
AT1G16670	GO:0046777	protein autophosphorylation	BP	HDA
AT1G16670	GO:0009625	response to insect	BP	IEP
AT1G16670	GO:0050826	response to freezing	BP	IMP
AT1G17370	GO:0003729	mRNA binding	MF	IBA
AT1G17370	GO:0003676	nucleic acid binding	MF	IEA
AT1G17370	GO:0005634	nucleus	CC	IEA
AT1G17370	GO:0003723	RNA binding	MF	IEA
AT1G17370	GO:0005515	protein binding	MF	IPI
AT1G17370	GO:0006397	mRNA processing	BP	IEA
AT1G17370	GO:0003729	mRNA binding	MF	HDA
AT1G17370	GO:0003729	mRNA binding	MF	IDA
AT1G17440	GO:0005634	nucleus	CC	IEA
AT1G17440	GO:0046982	protein heterodimerization activity	MF	IEA
AT1G17440	GO:0003743	translation initiation factor activity	MF	IEA
AT1G17440	GO:0006413	translational initiation	BP	IEA
AT1G17440	GO:0005634	nucleus	CC	IDA
AT1G17440	GO:0006352	DNA-templated transcription initiation	BP	IEA
AT1G17440	GO:0006412	translation	BP	IEA
AT1G17440	GO:0005669	transcription factor TFIID complex	CC	IEA
AT1G17440	GO:0000124	SAGA complex	CC	IEA
AT1G17440	GO:0005515	protein binding	MF	IPI
AT1G17440	GO:0003677	DNA binding	MF	IBA
AT1G17440	GO:0046695	SLIK (SAGA-like) complex	CC	IEA
AT1G17440	GO:0009736	cytokinin-activated signaling pathway	BP	IMP
AT1G17440	GO:0010104	regulation of ethylene-activated signaling pathway	BP	IMP
AT1G17440	GO:0005669	transcription factor TFIID complex	CC	IBA
AT1G17440	GO:0051123	RNA polymerase II preinitiation complex assembly	BP	IBA
AT1G17440	GO:0009867	jasmonic acid mediated signaling pathway	BP	IMP
AT1G17440	GO:0017025	TBP-class protein binding	MF	IBA
AT1G17550	GO:0046872	metal ion binding	MF	IEA
AT1G17550	GO:0016787	hydrolase activity	MF	IEA
AT1G17550	GO:0005515	protein binding	MF	IPI
AT1G17550	GO:0004721	phosphoprotein phosphatase activity	MF	IEA
AT1G17550	GO:0043169	cation binding	MF	IEA
AT1G17550	GO:0004722	protein serine/threonine phosphatase activity	MF	IEA
AT1G17550	GO:0009738	abscisic acid-activated signaling pathway	BP	IEA
AT1G17550	GO:0005634	nucleus	CC	IBA
AT1G17550	GO:0004722	protein serine/threonine phosphatase activity	MF	IBA
AT1G17550	GO:0035970	peptidyl-threonine dephosphorylation	BP	IBA
AT1G17550	GO:0017018	myosin phosphatase activity	MF	IEA
AT1G17600	GO:0016020	membrane	CC	IEA
AT1G17600	GO:0043531	ADP binding	MF	IEA
AT1G17600	GO:0007165	signal transduction	BP	IEA
AT1G17600	GO:0005634	nucleus	CC	IDA
AT1G17600	GO:0006952	defense response	BP	IEA
AT1G17600	GO:0005515	protein binding	MF	IPI
AT1G17600	GO:0005737	cytoplasm	CC	IDA
AT1G17600	GO:0045088	regulation of innate immune response	BP	IGI
AT1G18390	GO:0005524	ATP binding	MF	IEA
AT1G18390	GO:0004672	protein kinase activity	MF	IEA
AT1G18390	GO:0006468	protein phosphorylation	BP	IEA
AT1G18390	GO:0030247	polysaccharide binding	MF	IEA
AT1G18470	GO:0016020	membrane	CC	IEA
AT1G18470	GO:0005783	endoplasmic reticulum	CC	IDA
AT1G18470	GO:0009789	positive regulation of abscisic acid-activated signaling pathway	BP	IMP
AT1G18570	GO:0003677	DNA binding	MF	IEA
AT1G18570	GO:0005634	nucleus	CC	IEA
AT1G18570	GO:0006355	regulation of DNA-templated transcription	BP	IEA
AT1G18570	GO:0003700	DNA-binding transcription factor activity	MF	ISS
AT1G18570	GO:0042742	defense response to bacterium	BP	IMP
AT1G18570	GO:0000976	transcription cis-regulatory region binding	MF	IPI
AT1G18570	GO:0009625	response to insect	BP	IEP
AT1G18570	GO:0009617	response to bacterium	BP	IMP
AT1G18570	GO:0009682	induced systemic resistance	BP	IMP
AT1G18570	GO:0052544	defense response by callose deposition in cell wall	BP	IMP
AT1G18570	GO:0009759	indole glucosinolate biosynthetic process	BP	IMP
AT1G18750	GO:0000981	DNA-binding transcription factor activity, RNA polymerase II-specific	MF	IEA
AT1G18750	GO:0003677	DNA binding	MF	IEA
AT1G18750	GO:0005634	nucleus	CC	IEA
AT1G18750	GO:0046983	protein dimerization activity	MF	IEA
AT1G18750	GO:0006351	DNA-templated transcription	BP	IEA
AT1G18750	GO:0006355	regulation of DNA-templated transcription	BP	IEA
AT1G18750	GO:0005515	protein binding	MF	IPI
AT1G18750	GO:0000987	cis-regulatory region sequence-specific DNA binding	MF	IEA
AT1G18750	GO:0045944	positive regulation of transcription by RNA polymerase II	BP	IEA
AT1G18750	GO:0000981	DNA-binding transcription factor activity, RNA polymerase II-specific	MF	IBA
AT1G18750	GO:0006357	regulation of transcription by RNA polymerase II	BP	IBA
AT1G18750	GO:0000978	RNA polymerase II cis-regulatory region sequence-specific DNA binding	MF	IBA
AT1G18750	GO:0003700	DNA-binding transcription factor activity	MF	ISS
AT1G18750	GO:0009555	pollen development	BP	IGI
AT1G18750	GO:0080092	regulation of pollen tube growth	BP	IMP
AT1G18750	GO:0010152	pollen maturation	BP	IMP
AT1G18750	NA	NA	NA	NA
AT1G18860	GO:0043565	sequence-specific DNA binding	MF	IEA
AT1G18860	GO:0006355	regulation of DNA-templated transcription	BP	IEA
AT1G18860	GO:0003677	DNA binding	MF	IEA
AT1G18860	GO:0005634	nucleus	CC	IEA
AT1G18860	GO:0006351	DNA-templated transcription	BP	IEA
AT1G18860	GO:0003700	DNA-binding transcription factor activity	MF	IEA
AT1G18890	GO:0016740	transferase activity	MF	IEA
AT1G18890	GO:0046872	metal ion binding	MF	IEA
AT1G18890	GO:0016020	membrane	CC	IEA
AT1G18890	GO:0000166	nucleotide binding	MF	IEA
AT1G18890	GO:0005524	ATP binding	MF	IEA
AT1G18890	GO:0016301	kinase activity	MF	IEA
AT1G18890	GO:0016310	phosphorylation	BP	IEA
AT1G18890	GO:0005509	calcium ion binding	MF	IEA
AT1G18890	GO:0004672	protein kinase activity	MF	IEA
AT1G18890	GO:0006468	protein phosphorylation	BP	IEA
AT1G18890	GO:0004674	protein serine/threonine kinase activity	MF	IEA
AT1G18890	GO:0005737	cytoplasm	CC	IBA
AT1G18890	GO:0005634	nucleus	CC	IBA
AT1G18890	GO:0005886	plasma membrane	CC	IBA
AT1G18890	GO:0018105	peptidyl-serine phosphorylation	BP	IBA
AT1G18890	GO:0005516	calmodulin binding	MF	IBA
AT1G18890	GO:0046777	protein autophosphorylation	BP	IBA
AT1G18890	GO:0106310	protein serine kinase activity	MF	IEA
AT1G18890	GO:0009738	abscisic acid-activated signaling pathway	BP	TAS
AT1G18890	GO:0035556	intracellular signal transduction	BP	IBA
AT1G18890	GO:0004674	protein serine/threonine kinase activity	MF	HDA
AT1G18890	GO:0004672	protein kinase activity	MF	TAS
AT1G18890	GO:0046777	protein autophosphorylation	BP	HDA
AT1G18890	GO:0004683	calmodulin-dependent protein kinase activity	MF	IBA
AT1G18890	GO:0009931	calcium-dependent protein serine/threonine kinase activity	MF	IBA
AT1G18900	GO:0005515	protein binding	MF	IEA
AT1G19020	GO:0005575	cellular_component	CC	ND
AT1G19020	GO:0009611	response to wounding	BP	IDA
AT1G19020	GO:0006979	response to oxidative stress	BP	IMP
AT1G19020	GO:0009617	response to bacterium	BP	IEP
AT1G19020	GO:0071456	cellular response to hypoxia	BP	HEP
AT1G19020	GO:0000302	response to reactive oxygen species	BP	IEP
AT1G19200	NA	NA	NA	NA
AT1G19200	GO:0046872	metal ion binding	MF	IEA
AT1G19200	GO:0019900	kinase binding	MF	IPI
AT1G19200	GO:0009744	response to sucrose	BP	IEP
AT1G19200	GO:0009749	response to glucose	BP	IEP
AT1G19200	GO:0071368	cellular response to cytokinin stimulus	BP	IEP
AT1G19200	GO:1905582	response to mannose	BP	IEP
AT1G19210	GO:0006355	regulation of DNA-templated transcription	BP	IEA
AT1G19210	GO:0003677	DNA binding	MF	IEA
AT1G19210	GO:0005634	nucleus	CC	IEA
AT1G19210	GO:0003700	DNA-binding transcription factor activity	MF	IEA
AT1G19210	GO:0009873	ethylene-activated signaling pathway	BP	IEA
AT1G19210	GO:0003700	DNA-binding transcription factor activity	MF	ISS
AT1G19210	GO:0000976	transcription cis-regulatory region binding	MF	IPI
AT1G19270	GO:0046872	metal ion binding	MF	IEA
AT1G19270	GO:0043130	ubiquitin binding	MF	IDA
AT1G19270	GO:0005515	protein binding	MF	IPI
AT1G19270	GO:0032875	regulation of DNA endoreduplication	BP	IGI
AT1G19270	GO:0048317	seed morphogenesis	BP	IMP
AT1G19270	GO:0008233	peptidase activity	MF	IDA
AT1G19270	GO:0043130	ubiquitin binding	MF	IBA
AT1G19270	GO:0032875	regulation of DNA endoreduplication	BP	IMP
AT1G19270	GO:1900057	positive regulation of leaf senescence	BP	IMP
AT1G19270	GO:0008285	negative regulation of cell population proliferation	BP	IMP
AT1G19270	GO:0046620	regulation of organ growth	BP	IMP
AT1G19270	GO:0046621	negative regulation of organ growth	BP	IMP
AT1G19270	GO:0048482	plant ovule morphogenesis	BP	IMP
AT1G19270	GO:0080113	regulation of seed growth	BP	IMP
AT1G20840	GO:0016020	membrane	CC	IEA
AT1G20840	GO:0022857	transmembrane transporter activity	MF	IEA
AT1G20840	GO:0055085	transmembrane transport	BP	IEA
AT1G20840	GO:0005634	nucleus	CC	HDA
AT1G20840	GO:0008643	carbohydrate transport	BP	IEA
AT1G20840	GO:0016020	membrane	CC	IBA
AT1G20840	GO:0022857	transmembrane transporter activity	MF	IBA
AT1G20840	GO:0016021	integral component of membrane	CC	IEA
AT1G20840	GO:0055085	transmembrane transport	BP	IBA
AT1G20840	GO:0009624	response to nematode	BP	HEP
AT1G20840	GO:0019900	kinase binding	MF	IPI
AT1G20840	GO:0009409	response to cold	BP	IEP
AT1G20840	GO:0000325	plant-type vacuole	CC	HDA
AT1G20840	GO:0009705	plant-type vacuole membrane	CC	IDA
AT1G20840	GO:0009744	response to sucrose	BP	IEP
AT1G20840	GO:0009749	response to glucose	BP	IEP
AT1G20840	GO:0009414	response to water deprivation	BP	IEP
AT1G20840	GO:1902074	response to salt	BP	IEP
AT1G20840	GO:0000325	plant-type vacuole	CC	IDA
AT1G20840	GO:0009750	response to fructose	BP	IEP
AT1G20980	GO:0003677	DNA binding	MF	IEA
AT1G20980	GO:0046872	metal ion binding	MF	IEA
AT1G20980	GO:0005634	nucleus	CC	IEA
AT1G20980	GO:0005634	nucleus	CC	IDA
AT1G20980	GO:0005737	cytoplasm	CC	IEA
AT1G20980	GO:0005515	protein binding	MF	IPI
AT1G20980	GO:0003700	DNA-binding transcription factor activity	MF	ISS
AT1G20980	GO:0006355	regulation of DNA-templated transcription	BP	IDA
AT1G20980	GO:0006355	regulation of DNA-templated transcription	BP	TAS
AT1G20980	GO:0003677	DNA binding	MF	IDA
AT1G20980	GO:0045893	positive regulation of DNA-templated transcription	BP	IDA
AT1G21000	NA	NA	NA	NA
AT1G21450	GO:0005634	nucleus	CC	IEA
AT1G21450	GO:0003700	DNA-binding transcription factor activity	MF	IEA
AT1G21450	GO:0006355	regulation of DNA-templated transcription	BP	IEA
AT1G21450	GO:0005634	nucleus	CC	IBA
AT1G21450	GO:0006355	regulation of DNA-templated transcription	BP	IBA
AT1G21450	GO:0043565	sequence-specific DNA binding	MF	IBA
AT1G21450	GO:0003700	DNA-binding transcription factor activity	MF	ISS
AT1G21450	GO:0003700	DNA-binding transcription factor activity	MF	IBA
AT1G21450	GO:0006355	regulation of DNA-templated transcription	BP	TAS
AT1G21450	GO:0000976	transcription cis-regulatory region binding	MF	IPI
AT1G21830	NA	NA	NA	NA
AT1G21910	GO:0006355	regulation of DNA-templated transcription	BP	IEA
AT1G21910	GO:0003677	DNA binding	MF	IEA
AT1G21910	GO:0005634	nucleus	CC	IEA
AT1G21910	GO:0006351	DNA-templated transcription	BP	IEA
AT1G21910	GO:0003700	DNA-binding transcription factor activity	MF	IEA
AT1G21910	GO:0005634	nucleus	CC	IDA
AT1G21910	GO:0009873	ethylene-activated signaling pathway	BP	IEA
AT1G21910	GO:0003700	DNA-binding transcription factor activity	MF	ISS
AT1G21910	GO:0000976	transcription cis-regulatory region binding	MF	IPI
AT1G21910	GO:0045893	positive regulation of DNA-templated transcription	BP	IDA
AT1G21910	GO:0009751	response to salicylic acid	BP	IEP
AT1G21910	GO:0009753	response to jasmonic acid	BP	IEP
AT1G21910	GO:0034605	cellular response to heat	BP	IEP
AT1G21910	GO:0071497	cellular response to freezing	BP	IEP
AT1G22280	GO:0006470	protein dephosphorylation	BP	IEA
AT1G22280	GO:0004722	protein serine/threonine phosphatase activity	MF	IEA
AT1G22280	GO:0046872	metal ion binding	MF	IEA
AT1G22280	GO:0016787	hydrolase activity	MF	IEA
AT1G22280	GO:0005634	nucleus	CC	IEA
AT1G22280	GO:0004721	phosphoprotein phosphatase activity	MF	IEA
AT1G22280	GO:0006470	protein dephosphorylation	BP	IBA
AT1G22280	GO:0017018	myosin phosphatase activity	MF	IEA
AT1G22280	GO:0005634	nucleus	CC	HDA
AT1G22280	GO:0005634	nucleus	CC	IDA
AT1G22280	GO:0009506	plasmodesma	CC	HDA
AT1G22280	GO:0005886	plasma membrane	CC	HDA
AT1G22280	GO:0004721	phosphoprotein phosphatase activity	MF	IDA
AT1G22280	GO:0006470	protein dephosphorylation	BP	IDA
AT1G22280	GO:0010161	red light signaling pathway	BP	IEP
AT1G22570	GO:0016020	membrane	CC	IEA
AT1G22570	GO:0022857	transmembrane transporter activity	MF	IEA
AT1G22570	GO:0006857	oligopeptide transport	BP	IEA
AT1G22570	GO:0055085	transmembrane transport	BP	IEA
AT1G22570	GO:0016020	membrane	CC	IBA
AT1G22570	GO:0022857	transmembrane transporter activity	MF	IBA
AT1G22570	GO:0042937	tripeptide transmembrane transporter activity	MF	IEA
AT1G22570	GO:0042938	dipeptide transport	BP	IEA
AT1G22570	GO:0055085	transmembrane transport	BP	IBA
AT1G22570	GO:0035442	dipeptide transmembrane transport	BP	IEA
AT1G22570	GO:0042939	tripeptide transport	BP	IEA
AT1G22570	GO:0071916	dipeptide transmembrane transporter activity	MF	IEA
AT1G22890	GO:0009651	response to salt stress	BP	IEP
AT1G22890	GO:0048046	apoplast	CC	IDA
AT1G22890	GO:0048046	apoplast	CC	ISS
AT1G22890	GO:0009617	response to bacterium	BP	IEP
AT1G22890	GO:0009723	response to ethylene	BP	IEP
AT1G22890	GO:0005886	plasma membrane	CC	IDA
AT1G22890	GO:0003674	molecular_function	MF	ND
AT1G22890	GO:0006952	defense response	BP	IDA
AT1G22890	GO:0009409	response to cold	BP	IEP
AT1G22890	GO:0009414	response to water deprivation	BP	IEP
AT1G22890	GO:0042742	defense response to bacterium	BP	IDA
AT1G22890	GO:0005783	endoplasmic reticulum	CC	RCA
AT1G22890	GO:0005576	extracellular region	CC	RCA
AT1G22890	GO:0009753	response to jasmonic acid	BP	IEP
AT1G22890	GO:0033612	receptor serine/threonine kinase binding	MF	ISS
AT1G22890	GO:0009751	response to salicylic acid	BP	IEP
AT1G22890	GO:0030275	LRR domain binding	MF	ISS
AT1G22930	NA	NA	NA	NA
AT1G22930	GO:0005634	nucleus	CC	HDA
AT1G22930	GO:0007165	signal transduction	BP	IBA
AT1G22930	GO:0009506	plasmodesma	CC	HDA
AT1G22930	GO:0003674	molecular_function	MF	ND
AT1G23040	GO:0016020	membrane	CC	IEA
AT1G23040	GO:0003674	molecular_function	MF	ND
AT1G23710	GO:0071456	cellular response to hypoxia	BP	HEP
AT1G23870	GO:0016757	glycosyltransferase activity	MF	IEA
AT1G23870	GO:0016740	transferase activity	MF	IEA
AT1G23870	GO:0003824	catalytic activity	MF	IEA
AT1G23870	GO:0005992	trehalose biosynthetic process	BP	IEA
AT1G23870	GO:0004805	trehalose-phosphatase activity	MF	IEA
AT1G23870	GO:0005992	trehalose biosynthetic process	BP	IBA
AT1G23870	GO:0005991	trehalose metabolic process	BP	IEA
AT1G23870	GO:0070413	trehalose metabolism in response to stress	BP	IBA
AT1G24140	GO:0046872	metal ion binding	MF	IEA
AT1G24140	GO:0005886	plasma membrane	CC	IEA
AT1G24140	GO:0016020	membrane	CC	IEA
AT1G24140	GO:0006508	proteolysis	BP	IEA
AT1G24140	GO:0016787	hydrolase activity	MF	IEA
AT1G24140	GO:0008233	peptidase activity	MF	IEA
AT1G24140	GO:0008270	zinc ion binding	MF	IEA
AT1G24140	GO:0004222	metalloendopeptidase activity	MF	IEA
AT1G24140	GO:0008237	metallopeptidase activity	MF	IEA
AT1G24140	GO:0031012	extracellular matrix	CC	IEA
AT1G24140	GO:0004222	metalloendopeptidase activity	MF	IDA
AT1G24140	GO:0050832	defense response to fungus	BP	IMP
AT1G24140	GO:0004222	metalloendopeptidase activity	MF	IBA
AT1G24140	GO:0030198	extracellular matrix organization	BP	IBA
AT1G24140	GO:0030574	collagen catabolic process	BP	IBA
AT1G24145	GO:0005575	cellular_component	CC	ND
AT1G24150	GO:0045010	actin nucleation	BP	IEA
AT1G24150	GO:0016020	membrane	CC	IEA
AT1G24150	GO:0003779	actin binding	MF	IEA
AT1G24150	GO:0030036	actin cytoskeleton organization	BP	IEA
AT1G24150	GO:0051015	actin filament binding	MF	IEA
AT1G24150	NA	NA	NA	NA
AT1G24490	GO:0032977	membrane insertase activity	MF	IEA
AT1G24490	GO:0016020	membrane	CC	IEA
AT1G24490	GO:0009507	chloroplast	CC	IEA
AT1G24490	GO:0009536	plastid	CC	IEA
AT1G24490	GO:0009535	chloroplast thylakoid membrane	CC	IEA
AT1G24490	GO:0009579	thylakoid	CC	IEA
AT1G24490	GO:0005515	protein binding	MF	IPI
AT1G24490	GO:0016021	integral component of membrane	CC	IEA
AT1G24490	GO:0032977	membrane insertase activity	MF	IBA
AT1G24490	GO:0051205	protein insertion into membrane	BP	IBA
AT1G24490	GO:0009507	chloroplast	CC	IDA
AT1G24490	GO:0009535	chloroplast thylakoid membrane	CC	IDA
AT1G24490	GO:0010027	thylakoid membrane organization	BP	IBA
AT1G24490	GO:0009579	thylakoid	CC	IDA
AT1G24490	GO:0009658	chloroplast organization	BP	IMP
AT1G24490	GO:0009535	chloroplast thylakoid membrane	CC	IBA
AT1G24490	GO:0072598	protein localization to chloroplast	BP	IBA
AT1G24490	GO:0072598	protein localization to chloroplast	BP	IGI
AT1G24490	GO:0090150	establishment of protein localization to membrane	BP	IEA
AT1G24530	GO:0005515	protein binding	MF	IEA
AT1G25141	GO:0008150	biological_process	BP	ND
AT1G25141	GO:0003674	molecular_function	MF	ND
AT1G25277	NA	NA	NA	NA
AT1G25370	NA	NA	NA	NA
AT1G25400	GO:0016020	membrane	CC	IEA
AT1G25500	GO:0005886	plasma membrane	CC	IEA
AT1G25500	GO:0016020	membrane	CC	IEA
AT1G25500	GO:0022857	transmembrane transporter activity	MF	IEA
AT1G25500	GO:0055085	transmembrane transport	BP	IEA
AT1G25500	GO:0016020	membrane	CC	IBA
AT1G25500	GO:0022857	transmembrane transporter activity	MF	IBA
AT1G25500	GO:0055085	transmembrane transport	BP	IBA
AT1G25520	GO:0016020	membrane	CC	IEA
AT1G25520	GO:0005794	Golgi apparatus	CC	IBA
AT1G25520	GO:0005783	endoplasmic reticulum	CC	IDA
AT1G25520	GO:0035618	root hair	CC	IDA
AT1G25520	GO:0005384	manganese ion transmembrane transporter activity	MF	IBA
AT1G25520	GO:0070588	calcium ion transmembrane transport	BP	IBA
AT1G25520	GO:0015085	calcium ion transmembrane transporter activity	MF	IBA
AT1G25520	GO:0046873	metal ion transmembrane transporter activity	MF	IBA
AT1G25520	GO:0032468	Golgi calcium ion homeostasis	BP	IBA
AT1G25520	GO:0032472	Golgi calcium ion transport	BP	IBA
AT1G25520	GO:0071421	manganese ion transmembrane transport	BP	IBA
AT1G25560	GO:0006355	regulation of DNA-templated transcription	BP	IEA
AT1G25560	GO:0003677	DNA binding	MF	IEA
AT1G25560	GO:0005634	nucleus	CC	IEA
AT1G25560	GO:0006351	DNA-templated transcription	BP	IEA
AT1G25560	GO:0003700	DNA-binding transcription factor activity	MF	IEA
AT1G25560	GO:0005515	protein binding	MF	IPI
AT1G25560	GO:0009873	ethylene-activated signaling pathway	BP	IEA
AT1G25560	GO:0003700	DNA-binding transcription factor activity	MF	ISS
AT1G25560	GO:0000976	transcription cis-regulatory region binding	MF	IPI
AT1G25560	GO:0071456	cellular response to hypoxia	BP	HEP
AT1G25560	GO:0048573	photoperiodism, flowering	BP	IMP
AT1G26800	GO:0016740	transferase activity	MF	IEA
AT1G26800	GO:0046872	metal ion binding	MF	IEA
AT1G26800	GO:0005829	cytosol	CC	IDA
AT1G26800	GO:0005737	cytoplasm	CC	IDA
AT1G26800	GO:0005737	cytoplasm	CC	IEA
AT1G26800	GO:0005737	cytoplasm	CC	IBA
AT1G26800	GO:0061630	ubiquitin protein ligase activity	MF	IBA
AT1G26800	GO:0061630	ubiquitin protein ligase activity	MF	IDA
AT1G26800	GO:0016567	protein ubiquitination	BP	IBA
AT1G26800	GO:0071456	cellular response to hypoxia	BP	HEP
AT1G26800	GO:0051865	protein autoubiquitination	BP	IDA
AT1G26800	GO:0051787	misfolded protein binding	MF	IDA
AT1G26800	GO:0000209	protein polyubiquitination	BP	IMP
AT1G26800	GO:0061635	regulation of protein complex stability	BP	IMP
AT1G26800	GO:0071218	cellular response to misfolded protein	BP	IDA
AT1G26800	GO:0071629	cytoplasm protein quality control by the ubiquitin-proteasome system	BP	IMP
AT1G27100	GO:0000325	plant-type vacuole	CC	HDA
AT1G27290	GO:0016020	membrane	CC	IEA
AT1G27580	NA	NA	NA	NA
AT1G27730	GO:0046872	metal ion binding	MF	IEA
AT1G27730	GO:0005634	nucleus	CC	IEA
AT1G27730	GO:0003700	DNA-binding transcription factor activity	MF	IEA
AT1G27730	GO:0005634	nucleus	CC	IDA
AT1G27730	GO:0006355	regulation of DNA-templated transcription	BP	IEA
AT1G27730	GO:0003700	DNA-binding transcription factor activity	MF	ISS
AT1G27730	GO:0009409	response to cold	BP	IEP
AT1G27730	GO:0009414	response to water deprivation	BP	IEP
AT1G27730	GO:0009414	response to water deprivation	BP	IMP
AT1G27730	GO:0009651	response to salt stress	BP	IEP
AT1G27730	GO:0000976	transcription cis-regulatory region binding	MF	IPI
AT1G27730	GO:0015979	photosynthesis	BP	IMP
AT1G27730	GO:0009644	response to high light intensity	BP	IEP
AT1G27730	GO:0009611	response to wounding	BP	IEP
AT1G27730	GO:0010200	response to chitin	BP	IEP
AT1G27730	GO:0043565	sequence-specific DNA binding	MF	IDA
AT1G27730	GO:0006979	response to oxidative stress	BP	IMP
AT1G27730	GO:0071456	cellular response to hypoxia	BP	HEP
AT1G27730	GO:0045892	negative regulation of DNA-templated transcription	BP	IDA
AT1G27730	GO:0009737	response to abscisic acid	BP	IEP
AT1G27730	GO:0010117	photoprotection	BP	IMP
AT1G27730	GO:0035264	multicellular organism growth	BP	IMP
AT1G27760	GO:0005634	nucleus	CC	IDA
AT1G27760	GO:0005737	cytoplasm	CC	IDA
AT1G27760	GO:0009651	response to salt stress	BP	IMP
AT1G27760	NA	NA	NA	NA
AT1G28230	GO:1904823	purine nucleobase transmembrane transport	BP	IEA
AT1G28230	GO:0015860	purine nucleoside transmembrane transport	BP	IEA
AT1G28230	GO:0005886	plasma membrane	CC	IEA
AT1G28230	GO:0016020	membrane	CC	IEA
AT1G28230	GO:0016021	integral component of membrane	CC	IEA
AT1G28230	GO:0015211	purine nucleoside transmembrane transporter activity	MF	IEA
AT1G28230	GO:0005345	purine nucleobase transmembrane transporter activity	MF	IDA
AT1G28230	GO:0006863	purine nucleobase transport	BP	IDA
AT1G28230	GO:0010184	cytokinin transport	BP	IDA
AT1G28230	GO:0015211	purine nucleoside transmembrane transporter activity	MF	IDA
AT1G28230	GO:0005345	purine nucleobase transmembrane transporter activity	MF	IEA
AT1G28380	GO:0006952	defense response	BP	IEA
AT1G28380	GO:0005634	nucleus	CC	HDA
AT1G28380	GO:2000031	regulation of salicylic acid mediated signaling pathway	BP	IEA
AT1G28380	GO:0009626	plant-type hypersensitive response	BP	IEA
AT1G28380	GO:0012501	programmed cell death	BP	IEA
AT1G28380	GO:0002376	immune system process	BP	IEA
AT1G28380	GO:0045087	innate immune response	BP	IEA
AT1G28380	GO:0009651	response to salt stress	BP	TAS
AT1G28380	GO:0009626	plant-type hypersensitive response	BP	IMP
AT1G28380	GO:0052542	defense response by callose deposition	BP	IMP
AT1G28380	GO:0006955	immune response	BP	IMP
AT1G28380	GO:0010337	regulation of salicylic acid metabolic process	BP	IMP
AT1G28380	GO:0009626	plant-type hypersensitive response	BP	IBA
AT1G28380	GO:0008219	cell death	BP	IMP
AT1G28570	GO:0016788	hydrolase activity, acting on ester bonds	MF	IEA
AT1G28570	GO:0016787	hydrolase activity	MF	IEA
AT1G28570	GO:0005576	extracellular region	CC	IEA
AT1G28570	GO:0006629	lipid metabolic process	BP	IEA
AT1G28570	GO:0016042	lipid catabolic process	BP	IEA
AT1G28600	GO:0016787	hydrolase activity	MF	IEA
AT1G28600	GO:0005576	extracellular region	CC	IEA
AT1G28600	GO:0016788	hydrolase activity, acting on ester bonds	MF	IEA
AT1G28600	GO:0006629	lipid metabolic process	BP	IEA
AT1G28600	GO:0016042	lipid catabolic process	BP	IEA
AT1G29290	GO:0006995	cellular response to nitrogen starvation	BP	IEA
AT1G29290	GO:0006970	response to osmotic stress	BP	IEA
AT1G29290	GO:0016020	membrane	CC	IEA
AT1G29290	GO:0005576	extracellular region	CC	IEA
AT1G29290	GO:0006970	response to osmotic stress	BP	IEP
AT1G29290	GO:0048046	apoplast	CC	IEA
AT1G29290	GO:0048046	apoplast	CC	ISS
AT1G29290	GO:0005179	hormone activity	MF	IEA
AT1G29290	GO:0005179	hormone activity	MF	ISS
AT1G29290	GO:0007165	signal transduction	BP	IEA
AT1G29290	GO:1902025	nitrate import	BP	ISS
AT1G29290	GO:2000280	regulation of root development	BP	ISS
AT1G29290	GO:0010037	response to carbon dioxide	BP	IEP
AT1G29340	GO:0016740	transferase activity	MF	IEA
AT1G29340	GO:0004842	ubiquitin-protein transferase activity	MF	IEA
AT1G29340	GO:0016567	protein ubiquitination	BP	IEA
AT1G29340	GO:0005737	cytoplasm	CC	IBA
AT1G29340	GO:0005634	nucleus	CC	IBA
AT1G29340	GO:0005515	protein binding	MF	IEA
AT1G29340	GO:0004842	ubiquitin-protein transferase activity	MF	IDA
AT1G29340	GO:0016567	protein ubiquitination	BP	IDA
AT1G29340	GO:0098542	defense response to other organism	BP	IMP
AT1G29690	GO:0006952	defense response	BP	IEA
AT1G29690	GO:2000031	regulation of salicylic acid mediated signaling pathway	BP	IEA
AT1G29690	GO:0009626	plant-type hypersensitive response	BP	IEA
AT1G29690	GO:0009626	plant-type hypersensitive response	BP	IMP
AT1G29690	GO:0012501	programmed cell death	BP	IEA
AT1G29690	GO:0002376	immune system process	BP	IEA
AT1G29690	GO:0045087	innate immune response	BP	IEA
AT1G29690	GO:0008219	cell death	BP	IMP
AT1G29690	GO:0006955	immune response	BP	IMP
AT1G29690	GO:0009626	plant-type hypersensitive response	BP	IBA
AT1G29690	GO:0010337	regulation of salicylic acid metabolic process	BP	IMP
AT1G29970	GO:0016020	membrane	CC	IEA
AT1G29970	GO:0005840	ribosome	CC	IEA
AT1G29970	GO:1990904	ribonucleoprotein complex	CC	IEA
AT1G29970	GO:0003735	structural constituent of ribosome	MF	IEA
AT1G29970	GO:0006412	translation	BP	IEA
AT1G29970	GO:0005634	nucleus	CC	HDA
AT1G29970	GO:0003729	mRNA binding	MF	IDA
AT1G30220	GO:0005886	plasma membrane	CC	IEA
AT1G30220	GO:0016020	membrane	CC	IEA
AT1G30220	GO:0022857	transmembrane transporter activity	MF	IEA
AT1G30220	GO:0055085	transmembrane transport	BP	IEA
AT1G30220	GO:0016020	membrane	CC	IBA
AT1G30220	GO:0022857	transmembrane transporter activity	MF	IBA
AT1G30220	GO:0015293	symporter activity	MF	IEA
AT1G30220	GO:0016021	integral component of membrane	CC	IEA
AT1G30220	GO:0005886	plasma membrane	CC	IDA
AT1G30220	GO:0055085	transmembrane transport	BP	IBA
AT1G30220	GO:0090406	pollen tube	CC	TAS
AT1G30220	GO:0005366	myo-inositol:proton symporter activity	MF	IBA
AT1G30220	GO:0005366	myo-inositol:proton symporter activity	MF	IDA
AT1G30220	GO:0005366	myo-inositol:proton symporter activity	MF	IMP
AT1G30220	GO:0015798	myo-inositol transport	BP	IDA
AT1G30220	GO:0023052	signaling	BP	TAS
AT1G30220	GO:0015798	myo-inositol transport	BP	IBA
AT1G30400	GO:0042908	xenobiotic transport	BP	IEA
AT1G30400	GO:0016020	membrane	CC	IEA
AT1G30400	GO:0000166	nucleotide binding	MF	IEA
AT1G30400	GO:0005524	ATP binding	MF	IEA
AT1G30400	GO:0055085	transmembrane transport	BP	IEA
AT1G30400	GO:0005515	protein binding	MF	IPI
AT1G30400	GO:0005516	calmodulin binding	MF	IEA
AT1G30400	GO:0005773	vacuole	CC	IEA
AT1G30400	GO:0005774	vacuolar membrane	CC	IEA
AT1G30400	GO:0016020	membrane	CC	IBA
AT1G30400	GO:0016021	integral component of membrane	CC	IEA
AT1G30400	GO:0140359	ABC-type transporter activity	MF	IEA
AT1G30400	GO:0009506	plasmodesma	CC	HDA
AT1G30400	GO:0005773	vacuole	CC	HDA
AT1G30400	GO:0055085	transmembrane transport	BP	IBA
AT1G30400	GO:0005774	vacuolar membrane	CC	HDA
AT1G30400	GO:0000325	plant-type vacuole	CC	HDA
AT1G30400	GO:0042626	ATPase-coupled transmembrane transporter activity	MF	ISS
AT1G30400	GO:0042626	ATPase-coupled transmembrane transporter activity	MF	IBA
AT1G30400	GO:0046685	response to arsenic-containing substance	BP	IMP
AT1G30400	GO:0008559	ABC-type xenobiotic transporter activity	MF	IEA
AT1G30400	GO:1902417	(+)-abscisic acid D-glucopyranosyl ester transmembrane transporter activity	MF	IDA
AT1G30400	GO:1902418	(+)-abscisic acid D-glucopyranosyl ester transmembrane transport	BP	IDA
AT1G30400	GO:0015700	arsenite transport	BP	IDA
AT1G30400	GO:0015446	ATPase-coupled arsenite transmembrane transporter activity	MF	IDA
AT1G30400	GO:0044604	ABC-type phytochelatin transporter activity	MF	IDA
AT1G30400	GO:0061687	detoxification of inorganic compound	BP	IEA
AT1G30400	GO:0071722	detoxification of arsenic-containing substance	BP	IEA
AT1G30400	GO:0071994	phytochelatin transmembrane transport	BP	IEA
AT1G30475	NA	NA	NA	NA
AT1G30475	GO:0009658	chloroplast organization	BP	IBA
AT1G30475	GO:0009507	chloroplast	CC	IBA
AT1G30475	GO:0003674	molecular_function	MF	ND
AT1G30475	GO:0010027	thylakoid membrane organization	BP	IBA
AT1G30755	GO:0045927	positive regulation of growth	BP	IEA
AT1G30755	GO:0003746	translation elongation factor activity	MF	IEA
AT1G30755	GO:0006414	translational elongation	BP	IEA
AT1G30755	GO:0005634	nucleus	CC	IDA
AT1G30755	GO:0005634	nucleus	CC	IEA
AT1G30755	GO:0006412	translation	BP	IEA
AT1G30755	GO:0043434	response to peptide hormone	BP	IMP
AT1G30755	GO:0045927	positive regulation of growth	BP	IMP
AT1G30810	GO:0046872	metal ion binding	MF	IEA
AT1G30810	GO:0016491	oxidoreductase activity	MF	IEA
AT1G30810	GO:0005634	nucleus	CC	IEA
AT1G30810	GO:0006355	regulation of DNA-templated transcription	BP	IEA
AT1G30810	GO:0051213	dioxygenase activity	MF	IEA
AT1G30810	GO:0006325	chromatin organization	BP	IEA
AT1G30810	GO:0005634	nucleus	CC	IBA
AT1G30810	GO:0006338	chromatin remodeling	BP	IBA
AT1G30810	GO:0032452	histone demethylase activity	MF	IBA
AT1G30810	GO:0034647	histone H3-tri/di/monomethyl-lysine-4 demethylase activity	MF	IBA
AT1G30810	GO:0006355	regulation of DNA-templated transcription	BP	TAS
AT1G30810	GO:0000976	transcription cis-regulatory region binding	MF	IPI
AT1G30810	GO:0032453	histone H3-methyl-lysine-4 demethylase activity	MF	IDA
AT1G30810	GO:0048573	photoperiodism, flowering	BP	IMP
AT1G30810	GO:0022414	reproductive process	BP	IEA
AT1G30810	GO:0048731	system development	BP	IEA
AT1G30810	GO:0032453	histone H3-methyl-lysine-4 demethylase activity	MF	IEA
AT1G30810	GO:0016570	histone modification	BP	IEA
AT1G30970	GO:0003677	DNA binding	MF	IEA
AT1G30970	GO:0046872	metal ion binding	MF	IEA
AT1G30970	NA	NA	NA	NA
AT1G30970	GO:0005634	nucleus	CC	IDA
AT1G30970	GO:0005634	nucleus	CC	IEA
AT1G30970	GO:0005515	protein binding	MF	IPI
AT1G30970	GO:0009908	flower development	BP	IEA
AT1G30970	GO:0030154	cell differentiation	BP	IEA
AT1G30970	GO:0005634	nucleus	CC	IBA
AT1G30970	GO:0006355	regulation of DNA-templated transcription	BP	IBA
AT1G30970	GO:0003677	DNA binding	MF	IBA
AT1G30970	GO:0003700	DNA-binding transcription factor activity	MF	ISS
AT1G30970	GO:0006355	regulation of DNA-templated transcription	BP	IMP
AT1G30970	GO:0006355	regulation of DNA-templated transcription	BP	TAS
AT1G30970	GO:0000976	transcription cis-regulatory region binding	MF	IPI
AT1G30970	GO:0003677	DNA binding	MF	IDA
AT1G30970	GO:0042803	protein homodimerization activity	MF	IPI
AT1G30970	GO:0046982	protein heterodimerization activity	MF	IPI
AT1G30970	GO:0009910	negative regulation of flower development	BP	IGI
AT1G30970	GO:0051568	histone H3-K4 methylation	BP	IDA
AT1G31130	GO:0016020	membrane	CC	IEA
AT1G31130	GO:0003674	molecular_function	MF	ND
AT1G31130	GO:0005768	endosome	CC	HDA
AT1G31130	GO:0005794	Golgi apparatus	CC	HDA
AT1G31130	GO:0005802	trans-Golgi network	CC	HDA
AT1G31820	GO:0005886	plasma membrane	CC	IEA
AT1G31820	GO:0016020	membrane	CC	IEA
AT1G31820	GO:0022857	transmembrane transporter activity	MF	IEA
AT1G31820	GO:0055085	transmembrane transport	BP	IEA
AT1G31820	GO:0015293	symporter activity	MF	IEA
AT1G31820	GO:0015203	polyamine transmembrane transporter activity	MF	IDA
AT1G31820	GO:0015203	polyamine transmembrane transporter activity	MF	IGI
AT1G31820	GO:0015846	polyamine transport	BP	IDA
AT1G31820	GO:1902047	polyamine transmembrane transport	BP	IEA
AT1G31820	GO:0015203	polyamine transmembrane transporter activity	MF	IEA
AT1G32170	GO:0016740	transferase activity	MF	IEA
AT1G32170	GO:0071555	cell wall organization	BP	IEA
AT1G32170	GO:0016787	hydrolase activity	MF	IEA
AT1G32170	GO:0005975	carbohydrate metabolic process	BP	IEA
AT1G32170	GO:0016798	hydrolase activity, acting on glycosyl bonds	MF	IEA
AT1G32170	GO:0008152	metabolic process	BP	IEA
AT1G32170	GO:0005576	extracellular region	CC	IEA
AT1G32170	GO:0004553	hydrolase activity, hydrolyzing O-glycosyl compounds	MF	IEA
AT1G32170	GO:0048046	apoplast	CC	IEA
AT1G32170	GO:0016762	xyloglucan:xyloglucosyl transferase activity	MF	IEA
AT1G32170	GO:0006073	cellular glucan metabolic process	BP	IEA
AT1G32170	GO:0010411	xyloglucan metabolic process	BP	IEA
AT1G32170	GO:0042546	cell wall biogenesis	BP	IEA
AT1G32170	GO:0005618	cell wall	CC	IEA
AT1G32170	GO:0030247	polysaccharide binding	MF	ISS
AT1G32350	GO:0046872	metal ion binding	MF	IEA
AT1G32350	GO:0016020	membrane	CC	IEA
AT1G32350	GO:0016491	oxidoreductase activity	MF	IEA
AT1G32350	GO:0070469	respirasome	CC	IEA
AT1G32350	GO:0009916	alternative oxidase activity	MF	IEA
AT1G32350	GO:0102721	ubiquinol:oxygen oxidoreductase activity	MF	IEA
AT1G32350	GO:0043229	intracellular organelle	CC	IEA
AT1G32350	GO:0106292	superoxide-generating NADPH oxidase activity	MF	IEA
AT1G32350	GO:0106292	superoxide-generating NADPH oxidase activity	MF	IDA
AT1G32350	GO:0005739	mitochondrion	CC	IEA
AT1G32350	GO:0005743	mitochondrial inner membrane	CC	IEA
AT1G32350	GO:0005739	mitochondrion	CC	IBA
AT1G32350	GO:0005739	mitochondrion	CC	IDA
AT1G32350	GO:0009916	alternative oxidase activity	MF	IBA
AT1G32350	GO:0010230	alternative respiration	BP	IBA
AT1G32530	GO:0046872	metal ion binding	MF	IEA
AT1G32530	GO:0005515	protein binding	MF	IPI
AT1G33030	GO:0016740	transferase activity	MF	IEA
AT1G33030	GO:0046983	protein dimerization activity	MF	IEA
AT1G33030	GO:0008168	methyltransferase activity	MF	IEA
AT1G33030	GO:0032259	methylation	BP	IEA
AT1G33030	GO:0008171	O-methyltransferase activity	MF	IEA
AT1G33030	GO:0008757	S-adenosylmethionine-dependent methyltransferase activity	MF	IBA
AT1G33030	GO:0032259	methylation	BP	IBA
AT1G33030	GO:0008171	O-methyltransferase activity	MF	IBA
AT1G33030	GO:0019438	aromatic compound biosynthetic process	BP	IBA
AT1G33050	GO:0005515	protein binding	MF	IPI
AT1G33050	NA	NA	NA	NA
AT1G33102	GO:0003674	molecular_function	MF	ND
AT1G33110	GO:0016020	membrane	CC	IEA
AT1G33110	GO:0055085	transmembrane transport	BP	IEA
AT1G33110	GO:0005634	nucleus	CC	HDA
AT1G33110	GO:0015297	antiporter activity	MF	IEA
AT1G33110	GO:0016020	membrane	CC	IBA
AT1G33110	GO:0022857	transmembrane transporter activity	MF	IBA
AT1G33110	GO:0042910	xenobiotic transmembrane transporter activity	MF	IEA
AT1G33110	GO:1990961	xenobiotic detoxification by transmembrane export across the plasma membrane	BP	IEA
AT1G33980	GO:0003676	nucleic acid binding	MF	IEA
AT1G33980	GO:0000184	nuclear-transcribed mRNA catabolic process, nonsense-mediated decay	BP	IEA
AT1G33980	GO:0003729	mRNA binding	MF	IBA
AT1G33980	GO:0005730	nucleolus	CC	IDA
AT1G33980	GO:0005730	nucleolus	CC	IEA
AT1G33980	GO:0005634	nucleus	CC	IEA
AT1G33980	GO:0003723	RNA binding	MF	IEA
AT1G33980	GO:0006952	defense response	BP	IEA
AT1G33980	GO:0005634	nucleus	CC	HDA
AT1G33980	GO:0005737	cytoplasm	CC	IEA
AT1G33980	GO:0051028	mRNA transport	BP	IEA
AT1G33980	GO:0005737	cytoplasm	CC	IBA
AT1G33980	GO:0005730	nucleolus	CC	IBA
AT1G33980	GO:0000184	nuclear-transcribed mRNA catabolic process, nonsense-mediated decay	BP	IMP
AT1G33980	GO:0003729	mRNA binding	MF	HDA
AT1G33980	GO:0009611	response to wounding	BP	IMP
AT1G33980	GO:0042742	defense response to bacterium	BP	IMP
AT1G33980	GO:0000184	nuclear-transcribed mRNA catabolic process, nonsense-mediated decay	BP	IBA
AT1G33980	GO:0009863	salicylic acid mediated signaling pathway	BP	IMP
AT1G33980	GO:0009867	jasmonic acid mediated signaling pathway	BP	IMP
AT1G33980	GO:0048571	long-day photoperiodism	BP	IMP
AT1G33980	GO:0045727	positive regulation of translation	BP	IBA
AT1G34060	GO:0016740	transferase activity	MF	IEA
AT1G34060	GO:0016020	membrane	CC	IEA
AT1G34060	GO:0003824	catalytic activity	MF	IEA
AT1G34060	GO:0016846	carbon-sulfur lyase activity	MF	IEA
AT1G34060	GO:0008483	transaminase activity	MF	IEA
AT1G34060	GO:0006520	cellular amino acid metabolic process	BP	IBA
AT1G34060	GO:0008483	transaminase activity	MF	IBA
AT1G34180	GO:0006355	regulation of DNA-templated transcription	BP	IEA
AT1G34180	GO:0003677	DNA binding	MF	IEA
AT1G34180	GO:0016020	membrane	CC	IEA
AT1G34180	GO:0005634	nucleus	CC	IEA
AT1G34180	GO:0005515	protein binding	MF	IPI
AT1G34180	GO:0045893	positive regulation of DNA-templated transcription	BP	IMP
AT1G34180	GO:0003700	DNA-binding transcription factor activity	MF	ISS
AT1G34180	GO:0000976	transcription cis-regulatory region binding	MF	IPI
AT1G34180	GO:1900057	positive regulation of leaf senescence	BP	IMP
AT1G34260	GO:0016740	transferase activity	MF	IEA
AT1G34260	GO:0000166	nucleotide binding	MF	IEA
AT1G34260	GO:0005524	ATP binding	MF	IEA
AT1G34260	GO:0016301	kinase activity	MF	IEA
AT1G34260	GO:0016310	phosphorylation	BP	IEA
AT1G34260	GO:0016307	phosphatidylinositol phosphate kinase activity	MF	IEA
AT1G34260	GO:0046488	phosphatidylinositol metabolic process	BP	IEA
AT1G34260	GO:0046854	phosphatidylinositol phosphate biosynthetic process	BP	IEA
AT1G34260	GO:0000285	1-phosphatidylinositol-3-phosphate 5-kinase activity	MF	IEA
AT1G34260	GO:0071704	organic substance metabolic process	BP	IEA
AT1G34260	GO:0044238	primary metabolic process	BP	IEA
AT1G34260	GO:0010008	endosome membrane	CC	IBA
AT1G34260	GO:0046854	phosphatidylinositol phosphate biosynthetic process	BP	IBA
AT1G34260	GO:0000285	1-phosphatidylinositol-3-phosphate 5-kinase activity	MF	IBA
AT1G34300	GO:0016740	transferase activity	MF	IEA
AT1G34300	GO:0005886	plasma membrane	CC	IEA
AT1G34300	GO:0016020	membrane	CC	IEA
AT1G34300	GO:0000166	nucleotide binding	MF	IEA
AT1G34300	GO:0005524	ATP binding	MF	IEA
AT1G34300	GO:0016301	kinase activity	MF	IEA
AT1G34300	GO:0016310	phosphorylation	BP	IEA
AT1G34300	GO:0004672	protein kinase activity	MF	IEA
AT1G34300	GO:0006468	protein phosphorylation	BP	IEA
AT1G34300	GO:0004674	protein serine/threonine kinase activity	MF	IEA
AT1G34300	GO:0004674	protein serine/threonine kinase activity	MF	ISS
AT1G34300	GO:0030246	carbohydrate binding	MF	IEA
AT1G34300	GO:0048544	recognition of pollen	BP	IEA
AT1G34300	GO:0005516	calmodulin binding	MF	ISS
AT1G34300	GO:0106310	protein serine kinase activity	MF	IEA
AT1G34300	GO:0005886	plasma membrane	CC	HDA
AT1G34300	GO:0031625	ubiquitin protein ligase binding	MF	IEA
AT1G35140	GO:0005576	extracellular region	CC	IEA
AT1G35140	GO:0048046	apoplast	CC	IEA
AT1G35140	GO:0005615	extracellular space	CC	IEA
AT1G35140	GO:0005794	Golgi apparatus	CC	HDA
AT1G35140	GO:0001666	response to hypoxia	BP	IEP
AT1G35140	GO:0071456	cellular response to hypoxia	BP	HEP
AT1G35140	GO:0009505	plant-type cell wall	CC	HDA
AT1G35210	GO:0010224	response to UV-B	BP	IEP
AT1G35350	GO:0005886	plasma membrane	CC	IEA
AT1G35350	GO:0016020	membrane	CC	IEA
AT1G35350	GO:0006817	phosphate ion transport	BP	IEA
AT1G35350	GO:0005737	cytoplasm	CC	IBA
AT1G35350	GO:0005886	plasma membrane	CC	IBA
AT1G35350	GO:0005794	Golgi apparatus	CC	IBA
AT1G35350	GO:0016021	integral component of membrane	CC	IEA
AT1G35350	GO:0005802	trans-Golgi network	CC	IBA
AT1G35350	GO:0000822	inositol hexakisphosphate binding	MF	IBA
AT1G35350	GO:0035435	phosphate ion transmembrane transport	BP	IEA
AT1G35350	GO:0015114	phosphate ion transmembrane transporter activity	MF	IBA
AT1G35350	GO:0006817	phosphate ion transport	BP	IBA
AT1G35350	GO:0016036	cellular response to phosphate starvation	BP	IBA
AT1G42990	GO:0006355	regulation of DNA-templated transcription	BP	IEA
AT1G42990	GO:0016020	membrane	CC	IEA
AT1G42990	GO:0003677	DNA binding	MF	IEA
AT1G42990	GO:0005634	nucleus	CC	IEA
AT1G42990	GO:0005783	endoplasmic reticulum	CC	IEA
AT1G42990	GO:0005789	endoplasmic reticulum membrane	CC	IEA
AT1G42990	GO:0003700	DNA-binding transcription factor activity	MF	IEA
AT1G42990	GO:0005634	nucleus	CC	IDA
AT1G42990	GO:0003700	DNA-binding transcription factor activity	MF	IDA
AT1G42990	GO:0003700	DNA-binding transcription factor activity	MF	ISS
AT1G42990	GO:0002376	immune system process	BP	IEA
AT1G42990	GO:0043565	sequence-specific DNA binding	MF	IPI
AT1G42990	GO:0005789	endoplasmic reticulum membrane	CC	IDA
AT1G42990	GO:0030968	endoplasmic reticulum unfolded protein response	BP	IEP
AT1G42990	GO:0030968	endoplasmic reticulum unfolded protein response	BP	IMP
AT1G43700	GO:0006355	regulation of DNA-templated transcription	BP	IEA
AT1G43700	GO:0003677	DNA binding	MF	IEA
AT1G43700	GO:0005634	nucleus	CC	IEA
AT1G43700	GO:0005634	nucleus	CC	IMP
AT1G43700	GO:0006952	defense response	BP	IEA
AT1G43700	GO:0003700	DNA-binding transcription factor activity	MF	IEA
AT1G43700	GO:0005634	nucleus	CC	IDA
AT1G43700	GO:0005829	cytosol	CC	IDA
AT1G43700	GO:0005737	cytoplasm	CC	IEA
AT1G43700	GO:0005515	protein binding	MF	IPI
AT1G43700	GO:0005634	nucleus	CC	IBA
AT1G43700	GO:0003700	DNA-binding transcription factor activity	MF	IDA
AT1G43700	GO:0003700	DNA-binding transcription factor activity	MF	ISS
AT1G43700	GO:0003700	DNA-binding transcription factor activity	MF	IBA
AT1G43700	GO:0000976	transcription cis-regulatory region binding	MF	IPI
AT1G43700	GO:0006970	response to osmotic stress	BP	IMP
AT1G43700	GO:0043565	sequence-specific DNA binding	MF	IDA
AT1G43700	GO:0043621	protein self-association	MF	IPI
AT1G43700	GO:0003682	chromatin binding	MF	IDA
AT1G43700	GO:0009294	DNA-mediated transformation	BP	IDA
AT1G43700	GO:0003676	nucleic acid binding	MF	IDA
AT1G43700	GO:0007231	osmosensory signaling pathway	BP	IMP
AT1G43700	GO:0009652	thigmotropism	BP	IMP
AT1G43700	GO:0009970	cellular response to sulfate starvation	BP	IMP
AT1G43700	GO:0051170	import into nucleus	BP	IDA
AT1G43700	GO:0051019	mitogen-activated protein kinase binding	MF	IPI
AT1G43700	GO:0008272	sulfate transport	BP	IMP
AT1G43700	GO:0045596	negative regulation of cell differentiation	BP	IDA
AT1G44770	GO:0003746	translation elongation factor activity	MF	IEA
AT1G44770	GO:0006414	translational elongation	BP	IEA
AT1G44770	GO:0003674	molecular_function	MF	ND
AT1G44770	GO:0005575	cellular_component	CC	ND
AT1G45150	GO:0008150	biological_process	BP	ND
AT1G45150	GO:0003674	molecular_function	MF	ND
AT1G48000	GO:0043565	sequence-specific DNA binding	MF	IEA
AT1G48000	GO:0006355	regulation of DNA-templated transcription	BP	IEA
AT1G48000	GO:0005634	nucleus	CC	IEA
AT1G48000	GO:0003700	DNA-binding transcription factor activity	MF	IEA
AT1G48000	GO:0005634	nucleus	CC	IBA
AT1G48000	GO:0006355	regulation of DNA-templated transcription	BP	IBA
AT1G48000	GO:0043565	sequence-specific DNA binding	MF	IBA
AT1G48000	GO:0003700	DNA-binding transcription factor activity	MF	ISS
AT1G48000	GO:0000976	transcription cis-regulatory region binding	MF	IPI
AT1G48000	GO:0009737	response to abscisic acid	BP	IEP
AT1G48430	GO:0016740	transferase activity	MF	IEA
AT1G48430	GO:0000166	nucleotide binding	MF	IEA
AT1G48430	GO:0005524	ATP binding	MF	IEA
AT1G48430	GO:0016301	kinase activity	MF	IEA
AT1G48430	GO:0016310	phosphorylation	BP	IEA
AT1G48430	GO:0004371	glycerone kinase activity	MF	IEA
AT1G48430	GO:0006071	glycerol metabolic process	BP	IEA
AT1G48430	GO:0005829	cytosol	CC	IBA
AT1G48430	GO:0004371	glycerone kinase activity	MF	IBA
AT1G48430	GO:0019563	glycerol catabolic process	BP	IBA
AT1G48490	GO:0016740	transferase activity	MF	IEA
AT1G48490	GO:0046872	metal ion binding	MF	IEA
AT1G48490	GO:0000166	nucleotide binding	MF	IEA
AT1G48490	GO:0005524	ATP binding	MF	IEA
AT1G48490	GO:0016301	kinase activity	MF	IEA
AT1G48490	GO:0016310	phosphorylation	BP	IEA
AT1G48490	GO:0004672	protein kinase activity	MF	IEA
AT1G48490	GO:0006468	protein phosphorylation	BP	IEA
AT1G48490	GO:0004674	protein serine/threonine kinase activity	MF	IEA
AT1G48490	GO:0004674	protein serine/threonine kinase activity	MF	IBA
AT1G48490	GO:0018105	peptidyl-serine phosphorylation	BP	IBA
AT1G48490	GO:0106310	protein serine kinase activity	MF	IEA
AT1G48490	GO:0005515	protein binding	MF	IPI
AT1G48490	GO:0016301	kinase activity	MF	ISS
AT1G48490	GO:0035556	intracellular signal transduction	BP	IBA
AT1G48490	GO:0035618	root hair	CC	IDA
AT1G49360	GO:0005515	protein binding	MF	IEA
AT1G50570	NA	NA	NA	NA
AT1G51660	GO:0004713	protein tyrosine kinase activity	MF	IEA
AT1G51660	GO:0018108	peptidyl-tyrosine phosphorylation	BP	IEA
AT1G51660	GO:0016740	transferase activity	MF	IEA
AT1G51660	GO:0009507	chloroplast	CC	IEA
AT1G51660	GO:0009536	plastid	CC	IEA
AT1G51660	GO:0000166	nucleotide binding	MF	IEA
AT1G51660	GO:0005524	ATP binding	MF	IEA
AT1G51660	GO:0005634	nucleus	CC	IEA
AT1G51660	GO:0016301	kinase activity	MF	IEA
AT1G51660	GO:0016310	phosphorylation	BP	IEA
AT1G51660	GO:0004672	protein kinase activity	MF	IEA
AT1G51660	GO:0006468	protein phosphorylation	BP	IEA
AT1G51660	GO:0006952	defense response	BP	IEA
AT1G51660	GO:0005634	nucleus	CC	HDA
AT1G51660	GO:0004674	protein serine/threonine kinase activity	MF	IEA
AT1G51660	GO:0005737	cytoplasm	CC	IEA
AT1G51660	GO:0005515	protein binding	MF	IPI
AT1G51660	GO:0000165	MAPK cascade	BP	IEA
AT1G51660	GO:0009570	chloroplast stroma	CC	IDA
AT1G51660	GO:0009570	chloroplast stroma	CC	IEA
AT1G51660	GO:0005737	cytoplasm	CC	IBA
AT1G51660	GO:0004674	protein serine/threonine kinase activity	MF	IBA
AT1G51660	GO:0009626	plant-type hypersensitive response	BP	IEA
AT1G51660	GO:0106310	protein serine kinase activity	MF	IEA
AT1G51660	GO:0005737	cytoplasm	CC	HDA
AT1G51660	GO:0009875	pollen-pistil interaction	BP	IGI
AT1G51660	GO:0098542	defense response to other organism	BP	IMP
AT1G51660	GO:0010227	floral organ abscission	BP	IMP
AT1G51660	GO:0004708	MAP kinase kinase activity	MF	IEA
AT1G51660	GO:0010229	inflorescence development	BP	IGI
AT1G52000	GO:0030246	carbohydrate binding	MF	IEA
AT1G52000	GO:0005634	nucleus	CC	HDA
AT1G53100	GO:0016757	glycosyltransferase activity	MF	IEA
AT1G53100	GO:0016740	transferase activity	MF	IEA
AT1G53100	GO:0016020	membrane	CC	IEA
AT1G53100	GO:0015020	glucuronosyltransferase activity	MF	IEA
AT1G53100	GO:0008150	biological_process	BP	ND
AT1G53430	GO:0016020	membrane	CC	IEA
AT1G53430	GO:0005524	ATP binding	MF	IEA
AT1G53430	GO:0016301	kinase activity	MF	IEA
AT1G53430	GO:0016310	phosphorylation	BP	IEA
AT1G53430	GO:0004672	protein kinase activity	MF	IEA
AT1G53430	GO:0006468	protein phosphorylation	BP	IEA
AT1G53430	GO:0004674	protein serine/threonine kinase activity	MF	IEA
AT1G53430	GO:0005515	protein binding	MF	IEA
AT1G53430	GO:0016740	transferase activity	MF	IEA
AT1G53430	GO:0000166	nucleotide binding	MF	IEA
AT1G53430	GO:0005515	protein binding	MF	IPI
AT1G53430	GO:0004674	protein serine/threonine kinase activity	MF	IBA
AT1G53430	GO:0005886	plasma membrane	CC	IBA
AT1G53430	GO:0106310	protein serine kinase activity	MF	IEA
AT1G53780	GO:1901800	positive regulation of proteasomal protein catabolic process	BP	IEA
AT1G53780	GO:0000166	nucleotide binding	MF	IEA
AT1G53780	GO:0005524	ATP binding	MF	IEA
AT1G53780	GO:0016853	isomerase activity	MF	IEA
AT1G53780	GO:0005737	cytoplasm	CC	IEA
AT1G53780	GO:0016887	ATP hydrolysis activity	MF	IEA
AT1G53780	GO:0000502	proteasome complex	CC	IEA
AT1G53780	GO:0030163	protein catabolic process	BP	IEA
AT1G53780	GO:0003755	peptidyl-prolyl cis-trans isomerase activity	MF	IEA
AT1G53780	GO:0036402	proteasome-activating activity	MF	IEA
AT1G53780	GO:0000413	protein peptidyl-prolyl isomerization	BP	IEA
AT1G53910	GO:0006355	regulation of DNA-templated transcription	BP	IEA
AT1G53910	GO:0003677	DNA binding	MF	IEA
AT1G53910	GO:0005886	plasma membrane	CC	IEA
AT1G53910	GO:0016020	membrane	CC	IEA
AT1G53910	GO:0005634	nucleus	CC	IEA
AT1G53910	GO:0006351	DNA-templated transcription	BP	IEA
AT1G53910	GO:0003700	DNA-binding transcription factor activity	MF	IEA
AT1G53910	GO:0005634	nucleus	CC	IDA
AT1G53910	GO:0005515	protein binding	MF	IPI
AT1G53910	GO:0009873	ethylene-activated signaling pathway	BP	IEA
AT1G53910	GO:0003700	DNA-binding transcription factor activity	MF	ISS
AT1G53910	GO:0005886	plasma membrane	CC	IDA
AT1G53910	GO:0000976	transcription cis-regulatory region binding	MF	IPI
AT1G53910	GO:0001666	response to hypoxia	BP	IMP
AT1G53910	GO:2000280	regulation of root development	BP	IMP
AT1G53910	GO:0070483	detection of hypoxia	BP	IEP
AT1G54090	GO:0000145	exocyst	CC	IEA
AT1G54090	GO:0005634	nucleus	CC	IDA
AT1G54090	GO:0005829	cytosol	CC	IDA
AT1G54090	GO:0006887	exocytosis	BP	IEA
AT1G54090	GO:0015031	protein transport	BP	IEA
AT1G54090	GO:0005546	phosphatidylinositol-4,5-bisphosphate binding	MF	IEA
AT1G54090	GO:0006887	exocytosis	BP	IBA
AT1G54090	GO:0000145	exocyst	CC	IBA
AT1G54100	GO:0016491	oxidoreductase activity	MF	IEA
AT1G54100	GO:0016620	oxidoreductase activity, acting on the aldehyde or oxo group of donors, NAD or NADP as acceptor	MF	IEA
AT1G54100	GO:0004029	aldehyde dehydrogenase (NAD+) activity	MF	IEA
AT1G54100	GO:0009651	response to salt stress	BP	IEP
AT1G54100	GO:0009737	response to abscisic acid	BP	IEP
AT1G54100	GO:0009269	response to desiccation	BP	IEP
AT1G54100	GO:0004029	aldehyde dehydrogenase (NAD+) activity	MF	ISS
AT1G54100	GO:0043878	glyceraldehyde-3-phosphate dehydrogenase (NAD+) (non-phosphorylating) activity	MF	IEA
AT1G54100	GO:0006081	cellular aldehyde metabolic process	BP	ISS
AT1G54130	GO:0016740	transferase activity	MF	IEA
AT1G54130	GO:0009507	chloroplast	CC	IEA
AT1G54130	GO:0009536	plastid	CC	IEA
AT1G54130	GO:0000166	nucleotide binding	MF	IEA
AT1G54130	GO:0005524	ATP binding	MF	IEA
AT1G54130	GO:0016301	kinase activity	MF	IEA
AT1G54130	GO:0016310	phosphorylation	BP	IEA
AT1G54130	GO:0005525	GTP binding	MF	IEA
AT1G54130	GO:0015969	guanosine tetraphosphate metabolic process	BP	IEA
AT1G54130	GO:0009507	chloroplast	CC	IBA
AT1G54130	GO:0008728	GTP diphosphokinase activity	MF	IEA
AT1G54130	GO:0015979	photosynthesis	BP	IDA
AT1G54130	GO:0009507	chloroplast	CC	IDA
AT1G54130	GO:0010150	leaf senescence	BP	IMP
AT1G54130	GO:0008728	GTP diphosphokinase activity	MF	IGI
AT1G54130	GO:0008728	GTP diphosphokinase activity	MF	IMP
AT1G54130	GO:0015970	guanosine tetraphosphate biosynthetic process	BP	IGI
AT1G54130	GO:0015970	guanosine tetraphosphate biosynthetic process	BP	IMP
AT1G54210	GO:0005737	cytoplasm	CC	IEA
AT1G54210	GO:0015031	protein transport	BP	IEA
AT1G54210	GO:0006914	autophagy	BP	IEA
AT1G54210	GO:0000045	autophagosome assembly	BP	IEA
AT1G54210	GO:0006914	autophagy	BP	IGI
AT1G54210	GO:0000045	autophagosome assembly	BP	IBA
AT1G54210	GO:0000422	autophagy of mitochondrion	BP	IBA
AT1G54210	GO:0044804	autophagy of nucleus	BP	IBA
AT1G54210	GO:0034045	phagophore assembly site membrane	CC	IBA
AT1G54210	GO:0006501	C-terminal protein lipidation	BP	IBA
AT1G54210	GO:0034274	Atg12-Atg5-Atg16 complex	CC	IBA
AT1G54575	GO:0003674	molecular_function	MF	ND
AT1G54575	NA	NA	NA	NA
AT1G55110	GO:0046872	metal ion binding	MF	IEA
AT1G55110	GO:0003677	DNA binding	MF	IEA
AT1G55110	GO:0005634	nucleus	CC	IEA
AT1G55110	GO:0005634	nucleus	CC	IBA
AT1G55110	GO:0003700	DNA-binding transcription factor activity	MF	ISS
AT1G55110	GO:0003700	DNA-binding transcription factor activity	MF	IBA
AT1G55110	GO:0006355	regulation of DNA-templated transcription	BP	TAS
AT1G55110	GO:0010468	regulation of gene expression	BP	IEA
AT1G55265	GO:0003674	molecular_function	MF	ND
AT1G55265	GO:0099503	secretory vesicle	CC	HDA
AT1G55265	GO:0000325	plant-type vacuole	CC	HDA
AT1G55730	GO:0016020	membrane	CC	IEA
AT1G55730	GO:0055085	transmembrane transport	BP	IEA
AT1G55730	GO:0008324	cation transmembrane transporter activity	MF	IEA
AT1G55730	GO:0006812	cation transport	BP	IEA
AT1G55730	GO:0006811	ion transport	BP	IEA
AT1G55730	GO:0006816	calcium ion transport	BP	IEA
AT1G55730	GO:0015369	calcium:proton antiporter activity	MF	IEA
AT1G55730	GO:0015297	antiporter activity	MF	IEA
AT1G55730	GO:0070588	calcium ion transmembrane transport	BP	IEA
AT1G55730	GO:0005773	vacuole	CC	IEA
AT1G55730	GO:0005774	vacuolar membrane	CC	IEA
AT1G55730	GO:0016021	integral component of membrane	CC	IEA
AT1G55730	GO:0006874	cellular calcium ion homeostasis	BP	IBA
AT1G55730	GO:0070588	calcium ion transmembrane transport	BP	IBA
AT1G55730	GO:0009705	plant-type vacuole membrane	CC	IBA
AT1G55730	GO:0015369	calcium:proton antiporter activity	MF	IBA
AT1G56010	GO:0003677	DNA binding	MF	IEA
AT1G56010	GO:0006355	regulation of DNA-templated transcription	BP	IEA
AT1G56010	GO:0005634	nucleus	CC	IEA
AT1G56010	GO:0003700	DNA-binding transcription factor activity	MF	ISS
AT1G56010	GO:0003700	DNA-binding transcription factor activity	MF	TAS
AT1G56010	GO:0048527	lateral root development	BP	TAS
AT1G56010	GO:0009734	auxin-activated signaling pathway	BP	TAS
AT1G56140	GO:0016740	transferase activity	MF	IEA
AT1G56140	GO:0016020	membrane	CC	IEA
AT1G56140	GO:0000166	nucleotide binding	MF	IEA
AT1G56140	GO:0005524	ATP binding	MF	IEA
AT1G56140	GO:0016301	kinase activity	MF	IEA
AT1G56140	GO:0016310	phosphorylation	BP	IEA
AT1G56140	GO:0004672	protein kinase activity	MF	IEA
AT1G56140	GO:0006468	protein phosphorylation	BP	IEA
AT1G56140	GO:0004674	protein serine/threonine kinase activity	MF	IEA
AT1G56140	GO:0004674	protein serine/threonine kinase activity	MF	IBA
AT1G56140	GO:0005886	plasma membrane	CC	IBA
AT1G56140	GO:0005515	protein binding	MF	IEA
AT1G56140	GO:0106310	protein serine kinase activity	MF	IEA
AT1G56140	GO:0005886	plasma membrane	CC	HDA
AT1G56145	GO:0016020	membrane	CC	IEA
AT1G56145	GO:0005524	ATP binding	MF	IEA
AT1G56145	GO:0016301	kinase activity	MF	IEA
AT1G56145	GO:0016310	phosphorylation	BP	IEA
AT1G56145	GO:0004672	protein kinase activity	MF	IEA
AT1G56145	GO:0006468	protein phosphorylation	BP	IEA
AT1G56145	GO:0005634	nucleus	CC	HDA
AT1G56145	GO:0004674	protein serine/threonine kinase activity	MF	IEA
AT1G56145	GO:0004674	protein serine/threonine kinase activity	MF	IBA
AT1G56145	GO:0005886	plasma membrane	CC	IBA
AT1G56145	GO:0009506	plasmodesma	CC	HDA
AT1G56145	GO:0005886	plasma membrane	CC	HDA
AT1G56280	NA	NA	NA	NA
AT1G56460	GO:0006338	chromatin remodeling	BP	IEA
AT1G56460	GO:0031011	Ino80 complex	CC	IEA
AT1G56460	GO:0031011	Ino80 complex	CC	IBA
AT1G56460	GO:0003674	molecular_function	MF	ND
AT1G56650	GO:0003677	DNA binding	MF	IEA
AT1G56650	GO:0005634	nucleus	CC	IEA
AT1G56650	GO:0005515	protein binding	MF	IPI
AT1G56650	GO:0006355	regulation of DNA-templated transcription	BP	IEA
AT1G56650	GO:0003700	DNA-binding transcription factor activity	MF	ISS
AT1G56650	GO:0003700	DNA-binding transcription factor activity	MF	TAS
AT1G56650	GO:0009733	response to auxin	BP	IEP
AT1G56650	GO:0009723	response to ethylene	BP	IEP
AT1G56650	GO:0009718	anthocyanin-containing compound biosynthetic process	BP	IMP
AT1G56650	GO:0009867	jasmonic acid mediated signaling pathway	BP	IMP
AT1G56650	GO:0002239	response to oomycetes	BP	IEP
AT1G56650	GO:0031540	regulation of anthocyanin biosynthetic process	BP	IMP
AT1G56650	GO:0009745	sucrose mediated signaling	BP	IMP
AT1G56650	GO:0019430	removal of superoxide radicals	BP	IMP
AT1G56650	GO:0031542	positive regulation of anthocyanin biosynthetic process	BP	IMP
AT1G57590	GO:0016787	hydrolase activity	MF	IEA
AT1G57590	GO:0071555	cell wall organization	BP	IEA
AT1G57590	GO:0005576	extracellular region	CC	IEA
AT1G57590	GO:0052793	pectin acetylesterase activity	MF	IBA
AT1G57590	GO:0071555	cell wall organization	BP	IBA
AT1G57590	GO:0009505	plant-type cell wall	CC	IBA
AT1G58235	NA	NA	NA	NA
AT1G58420	GO:0006952	defense response	BP	IEP
AT1G59590	GO:0016020	membrane	CC	IEA
AT1G59620	NA	NA	NA	NA
AT1G59620	GO:0043531	ADP binding	MF	IEA
AT1G59620	GO:0006952	defense response	BP	IEA
AT1G59910	GO:0045010	actin nucleation	BP	IEA
AT1G59910	GO:0003779	actin binding	MF	IEA
AT1G59910	GO:0030036	actin cytoskeleton organization	BP	IEA
AT1G59910	GO:0051015	actin filament binding	MF	IEA
AT1G59910	GO:0003779	actin binding	MF	ISS
AT1G60730	NA	NA	NA	NA
AT1G60730	GO:0016491	oxidoreductase activity	MF	IEA
AT1G60730	GO:0005634	nucleus	CC	HDA
AT1G60730	GO:0005737	cytoplasm	CC	IBA
AT1G60730	GO:0004033	aldo-keto reductase (NADP) activity	MF	IBA
AT1G60900	GO:0003676	nucleic acid binding	MF	IEA
AT1G60900	GO:0005634	nucleus	CC	IDA
AT1G60900	GO:0005634	nucleus	CC	IEA
AT1G60900	GO:0003723	RNA binding	MF	IEA
AT1G60900	GO:0006397	mRNA processing	BP	IEA
AT1G60900	GO:0005634	nucleus	CC	IPI
AT1G60900	GO:0008380	RNA splicing	BP	IEA
AT1G60900	GO:0005681	spliceosomal complex	CC	IEA
AT1G60900	GO:0005515	protein binding	MF	IPI
AT1G60900	GO:0071004	U2-type prespliceosome	CC	IBA
AT1G60900	GO:0016607	nuclear speck	CC	IBA
AT1G60900	GO:0016607	nuclear speck	CC	IDA
AT1G60900	GO:0009737	response to abscisic acid	BP	IDA
AT1G60900	GO:0000243	commitment complex	CC	IBA
AT1G60900	GO:0008187	poly-pyrimidine tract binding	MF	IBA
AT1G60900	GO:0030628	pre-mRNA 3'-splice site binding	MF	IBA
AT1G60900	GO:0089701	U2AF complex	CC	IBA
AT1G60900	GO:0000398	mRNA splicing, via spliceosome	BP	IMP
AT1G61800	GO:0016020	membrane	CC	IEA
AT1G61800	GO:0009507	chloroplast	CC	IEA
AT1G61800	GO:0009536	plastid	CC	IEA
AT1G61800	GO:0022857	transmembrane transporter activity	MF	IEA
AT1G61800	GO:0055085	transmembrane transport	BP	IEA
AT1G61800	GO:0008643	carbohydrate transport	BP	IEA
AT1G61800	GO:0031969	chloroplast membrane	CC	IEA
AT1G61800	GO:0005794	Golgi apparatus	CC	IBA
AT1G61800	GO:0016021	integral component of membrane	CC	IEA
AT1G61800	GO:0009744	response to sucrose	BP	IEP
AT1G61800	GO:0009749	response to glucose	BP	IEP
AT1G61800	GO:0015979	photosynthesis	BP	IMP
AT1G61800	GO:0009507	chloroplast	CC	IDA
AT1G61800	GO:0009624	response to nematode	BP	IEP
AT1G61800	GO:0015297	antiporter activity	MF	IBA
AT1G61800	GO:0000325	plant-type vacuole	CC	HDA
AT1G61800	GO:0010109	regulation of photosynthesis	BP	IMP
AT1G61800	GO:0015120	phosphoglycerate transmembrane transporter activity	MF	IBA
AT1G61800	GO:0071917	triose-phosphate transmembrane transporter activity	MF	IBA
AT1G61800	GO:0015120	phosphoglycerate transmembrane transporter activity	MF	IDA
AT1G61800	GO:0015120	phosphoglycerate transmembrane transporter activity	MF	IEA
AT1G61800	GO:0015713	phosphoglycerate transmembrane transport	BP	IDA
AT1G61800	GO:0015714	phosphoenolpyruvate transport	BP	IDA
AT1G61800	GO:0005315	inorganic phosphate transmembrane transporter activity	MF	IDA
AT1G61800	GO:0015152	glucose-6-phosphate transmembrane transporter activity	MF	IDA
AT1G61800	GO:0071917	triose-phosphate transmembrane transporter activity	MF	IDA
AT1G61800	GO:0009643	photosynthetic acclimation	BP	IMP
AT1G61800	GO:0015760	glucose-6-phosphate transport	BP	IDA
AT1G61800	GO:0035436	triose phosphate transmembrane transport	BP	IDA
AT1G61800	GO:0015605	organophosphate ester transmembrane transporter activity	MF	IEA
AT1G61800	GO:0015713	phosphoglycerate transmembrane transport	BP	IEA
AT1G61800	GO:0015748	organophosphate ester transport	BP	IEA
AT1G62422	GO:0003674	molecular_function	MF	ND
AT1G62422	GO:0005575	cellular_component	CC	ND
AT1G62810	GO:0046872	metal ion binding	MF	IEA
AT1G62810	GO:0016491	oxidoreductase activity	MF	IEA
AT1G62810	GO:0005576	extracellular region	CC	IEA
AT1G62810	GO:0009737	response to abscisic acid	BP	IEP
AT1G62810	GO:0005507	copper ion binding	MF	IEA
AT1G62810	GO:0048046	apoplast	CC	IEA
AT1G62810	GO:0048038	quinone binding	MF	IEA
AT1G62810	GO:0008131	primary amine oxidase activity	MF	IEA
AT1G62810	GO:0009308	amine metabolic process	BP	IEA
AT1G62810	GO:0009738	abscisic acid-activated signaling pathway	BP	IEA
AT1G62810	GO:0005615	extracellular space	CC	IDA
AT1G62810	GO:0052593	tryptamine:oxygen oxidoreductase (deaminating) activity	MF	IEA
AT1G62810	GO:0052594	aminoacetone:oxygen oxidoreductase(deaminating) activity	MF	IEA
AT1G62810	GO:0052595	aliphatic amine oxidase activity	MF	IDA
AT1G62810	GO:0052595	aliphatic amine oxidase activity	MF	IEA
AT1G62810	GO:0052596	phenethylamine:oxygen oxidoreductase (deaminating) activity	MF	IEA
AT1G62810	GO:0009733	response to auxin	BP	IEP
AT1G62810	GO:0009738	abscisic acid-activated signaling pathway	BP	IMP
AT1G62810	GO:0009611	response to wounding	BP	IEP
AT1G62810	GO:0009753	response to jasmonic acid	BP	IEA
AT1G62810	GO:0009753	response to jasmonic acid	BP	IEP
AT1G62810	GO:0002237	response to molecule of bacterial origin	BP	IEP
AT1G62810	GO:0009751	response to salicylic acid	BP	IEP
AT1G62810	GO:0005507	copper ion binding	MF	IBA
AT1G62810	GO:0008131	primary amine oxidase activity	MF	IBA
AT1G62810	GO:0009308	amine metabolic process	BP	IBA
AT1G62810	GO:0009414	response to water deprivation	BP	IEP
AT1G62810	GO:0006809	nitric oxide biosynthetic process	BP	IMP
AT1G62810	GO:1904585	response to putrescine	BP	IEP
AT1G62810	GO:0009447	putrescine catabolic process	BP	IEA
AT1G63010	GO:0016020	membrane	CC	IEA
AT1G63010	GO:0022857	transmembrane transporter activity	MF	IEA
AT1G63010	GO:0055085	transmembrane transport	BP	IEA
AT1G63010	GO:1905011	transmembrane phosphate ion transport from cytosol to vacuole	BP	IBA
AT1G63010	GO:0016020	membrane	CC	IBA
AT1G63010	GO:0009705	plant-type vacuole membrane	CC	IBA
AT1G63010	GO:0005634	nucleus	CC	HDA
AT1G63010	GO:0005773	vacuole	CC	HDA
AT1G63010	GO:0005794	Golgi apparatus	CC	HDA
AT1G63010	GO:0005774	vacuolar membrane	CC	HDA
AT1G63010	GO:0015114	phosphate ion transmembrane transporter activity	MF	IDA
AT1G63010	GO:0015114	phosphate ion transmembrane transporter activity	MF	IGI
AT1G63010	GO:0006817	phosphate ion transport	BP	IMP
AT1G63010	GO:0055062	phosphate ion homeostasis	BP	IDA
AT1G63010	GO:0055062	phosphate ion homeostasis	BP	IMP
AT1G63010	GO:1905011	transmembrane phosphate ion transport from cytosol to vacuole	BP	IDA
AT1G63010	GO:1905011	transmembrane phosphate ion transport from cytosol to vacuole	BP	IGI
AT1G63010	GO:0000325	plant-type vacuole	CC	HDA
AT1G63010	GO:0009705	plant-type vacuole membrane	CC	IDA
AT1G63350	GO:0000166	nucleotide binding	MF	IEA
AT1G63350	GO:0005524	ATP binding	MF	IEA
AT1G63350	GO:0043531	ADP binding	MF	IEA
AT1G63350	GO:0006952	defense response	BP	IEA
AT1G63350	GO:0005515	protein binding	MF	IEA
AT1G63350	GO:0005575	cellular_component	CC	ND
AT1G63370	GO:0004497	monooxygenase activity	MF	IEA
AT1G63370	GO:0016491	oxidoreductase activity	MF	IEA
AT1G63370	GO:0050660	flavin adenine dinucleotide binding	MF	IEA
AT1G63370	GO:0050661	NADP binding	MF	IEA
AT1G63370	GO:0004499	N,N-dimethylaniline monooxygenase activity	MF	IEA
AT1G63370	GO:0008150	biological_process	BP	ND
AT1G63840	GO:0016020	membrane	CC	IEA
AT1G63840	GO:0061630	ubiquitin protein ligase activity	MF	IBA
AT1G63840	GO:0016567	protein ubiquitination	BP	IBA
AT1G63840	GO:0009737	response to abscisic acid	BP	IEP
AT1G64065	GO:0016020	membrane	CC	IEA
AT1G64065	GO:0003674	molecular_function	MF	ND
AT1G64280	GO:0090575	RNA polymerase II transcription regulator complex	CC	IPI
AT1G64280	GO:0045893	positive regulation of DNA-templated transcription	BP	IDA
AT1G64280	GO:0009862	systemic acquired resistance, salicylic acid mediated signaling pathway	BP	IDA
AT1G64280	GO:0005634	nucleus	CC	NAS
AT1G64280	GO:0005634	nucleus	CC	IDA
AT1G64280	GO:0005634	nucleus	CC	IEA
AT1G64280	GO:0006952	defense response	BP	IEA
AT1G64280	GO:0005737	cytoplasm	CC	IEA
AT1G64280	GO:0005515	protein binding	MF	IPI
AT1G64280	GO:0016567	protein ubiquitination	BP	IEA
AT1G64280	GO:2000031	regulation of salicylic acid mediated signaling pathway	BP	IEA
AT1G64280	GO:0005737	cytoplasm	CC	IBA
AT1G64280	GO:0005634	nucleus	CC	IBA
AT1G64280	GO:0009626	plant-type hypersensitive response	BP	IEA
AT1G64280	GO:0009862	systemic acquired resistance, salicylic acid mediated signaling pathway	BP	IEA
AT1G64280	GO:2000022	regulation of jasmonic acid mediated signaling pathway	BP	IEA
AT1G64280	GO:0005515	protein binding	MF	IEA
AT1G64280	GO:0005737	cytoplasm	CC	IDA
AT1G64280	GO:0009611	response to wounding	BP	IMP
AT1G64280	GO:0009625	response to insect	BP	IMP
AT1G64280	GO:0050832	defense response to fungus	BP	IMP
AT1G64280	GO:0042742	defense response to bacterium	BP	IEA
AT1G64280	GO:2000031	regulation of salicylic acid mediated signaling pathway	BP	IMP
AT1G64280	GO:0001666	response to hypoxia	BP	IMP
AT1G64280	GO:0009617	response to bacterium	BP	IMP
AT1G64280	GO:0009617	response to bacterium	BP	TAS
AT1G64280	GO:0009408	response to heat	BP	IMP
AT1G64280	GO:0031348	negative regulation of defense response	BP	IMP
AT1G64280	GO:2000022	regulation of jasmonic acid mediated signaling pathway	BP	IMP
AT1G64280	GO:0009627	systemic acquired resistance	BP	IEP
AT1G64280	GO:0009627	systemic acquired resistance	BP	TAS
AT1G64280	GO:2000022	regulation of jasmonic acid mediated signaling pathway	BP	IBA
AT1G64280	GO:0009682	induced systemic resistance	BP	IMP
AT1G64280	GO:0009862	systemic acquired resistance, salicylic acid mediated signaling pathway	BP	TAS
AT1G64280	GO:0106167	extracellular ATP signaling	BP	IMP
AT1G64280	GO:0042742	defense response to bacterium	BP	IBA
AT1G64280	GO:0050832	defense response to fungus	BP	IBA
AT1G64280	GO:0009862	systemic acquired resistance, salicylic acid mediated signaling pathway	BP	IMP
AT1G64280	GO:0010112	regulation of systemic acquired resistance	BP	IMP
AT1G64280	GO:0050832	defense response to fungus	BP	IEA
AT1G64280	GO:0080027	response to herbivore	BP	IEA
AT1G64610	GO:0005515	protein binding	MF	IEA
AT1G64840	GO:0005515	protein binding	MF	IEA
AT1G64840	GO:0005515	protein binding	MF	IPI
AT1G64840	GO:0005737	cytoplasm	CC	IDA
AT1G64950	GO:0046872	metal ion binding	MF	IEA
AT1G64950	GO:0004497	monooxygenase activity	MF	IEA
AT1G64950	GO:0016491	oxidoreductase activity	MF	IEA
AT1G64950	GO:0005506	iron ion binding	MF	IEA
AT1G64950	GO:0016705	oxidoreductase activity, acting on paired donors, with incorporation or reduction of molecular oxygen	MF	IEA
AT1G64950	GO:0020037	heme binding	MF	IEA
AT1G64950	GO:0016020	membrane	CC	IBA
AT1G64950	GO:0005783	endoplasmic reticulum	CC	HDA
AT1G64950	GO:0016709	oxidoreductase activity, acting on paired donors, with incorporation or reduction of molecular oxygen, NAD(P)H as one donor, and incorporation of one atom of oxygen	MF	IBA
AT1G64970	GO:0016740	transferase activity	MF	IEA
AT1G64970	GO:0009507	chloroplast	CC	IEA
AT1G64970	GO:0009536	plastid	CC	IEA
AT1G64970	GO:0008168	methyltransferase activity	MF	IEA
AT1G64970	GO:0032259	methylation	BP	IEA
AT1G64970	GO:0005634	nucleus	CC	HDA
AT1G64970	GO:0008168	methyltransferase activity	MF	IBA
AT1G64970	GO:0009507	chloroplast	CC	ISS
AT1G64970	GO:0010189	vitamin E biosynthetic process	BP	IEA
AT1G64970	GO:0010189	vitamin E biosynthetic process	BP	IMP
AT1G64970	GO:0050342	tocopherol O-methyltransferase activity	MF	IEA
AT1G64970	GO:0050342	tocopherol O-methyltransferase activity	MF	IDA
AT1G64970	GO:0071704	organic substance metabolic process	BP	IEA
AT1G65250	GO:0000166	nucleotide binding	MF	IEA
AT1G65250	GO:0005524	ATP binding	MF	IEA
AT1G65250	GO:0007166	cell surface receptor signaling pathway	BP	IEA
AT1G65250	GO:0004672	protein kinase activity	MF	IEA
AT1G65250	GO:0006468	protein phosphorylation	BP	IEA
AT1G65250	GO:0005886	plasma membrane	CC	IBA
AT1G65250	GO:0007166	cell surface receptor signaling pathway	BP	IBA
AT1G65690	GO:0005886	plasma membrane	CC	IEA
AT1G65690	GO:0016020	membrane	CC	IEA
AT1G65690	GO:0005829	cytosol	CC	IDA
AT1G65690	GO:0005737	cytoplasm	CC	IEA
AT1G65690	GO:0005829	cytosol	CC	IEA
AT1G65690	GO:0009738	abscisic acid-activated signaling pathway	BP	IEA
AT1G65690	GO:0005886	plasma membrane	CC	IDA
AT1G65690	GO:0006970	response to osmotic stress	BP	IMP
AT1G65690	GO:0009737	response to abscisic acid	BP	IEP
AT1G65690	GO:0009737	response to abscisic acid	BP	IMP
AT1G65690	GO:1902074	response to salt	BP	IMP
AT1G65690	GO:0010116	positive regulation of abscisic acid biosynthetic process	BP	IMP
AT1G65790	GO:0005886	plasma membrane	CC	IEA
AT1G65790	GO:0016020	membrane	CC	IEA
AT1G65790	GO:0000166	nucleotide binding	MF	IEA
AT1G65790	GO:0005524	ATP binding	MF	IEA
AT1G65790	GO:0016301	kinase activity	MF	IEA
AT1G65790	GO:0016310	phosphorylation	BP	IEA
AT1G65790	GO:0004672	protein kinase activity	MF	IEA
AT1G65790	GO:0006468	protein phosphorylation	BP	IEA
AT1G65790	GO:0030246	carbohydrate binding	MF	IEA
AT1G65790	GO:0048544	recognition of pollen	BP	IEA
AT1G65790	GO:0004674	protein serine/threonine kinase activity	MF	IEA
AT1G65790	GO:0031625	ubiquitin protein ligase binding	MF	IEA
AT1G65790	GO:0016740	transferase activity	MF	IEA
AT1G65790	GO:0005634	nucleus	CC	IDA
AT1G65790	GO:0004674	protein serine/threonine kinase activity	MF	IDA
AT1G65790	GO:0009738	abscisic acid-activated signaling pathway	BP	IEA
AT1G65790	GO:0004674	protein serine/threonine kinase activity	MF	IBA
AT1G65790	GO:0005886	plasma membrane	CC	IBA
AT1G65790	GO:0006468	protein phosphorylation	BP	IBA
AT1G65790	GO:0106310	protein serine kinase activity	MF	IEA
AT1G65790	GO:0006468	protein phosphorylation	BP	IDA
AT1G65790	GO:0071215	cellular response to abscisic acid stimulus	BP	IMP
AT1G65790	GO:0004672	protein kinase activity	MF	IDA
AT1G65790	GO:0046777	protein autophosphorylation	BP	IDA
AT1G65790	GO:0031625	ubiquitin protein ligase binding	MF	IPI
AT1G65820	GO:0016740	transferase activity	MF	IEA
AT1G65820	GO:0016020	membrane	CC	IEA
AT1G65820	GO:0016021	integral component of membrane	CC	IEA
AT1G65820	GO:0098869	cellular oxidant detoxification	BP	IEA
AT1G65820	GO:0005634	nucleus	CC	HDA
AT1G65820	GO:0005783	endoplasmic reticulum	CC	IBA
AT1G65820	GO:0005773	vacuole	CC	HDA
AT1G65820	GO:0005783	endoplasmic reticulum	CC	HDA
AT1G65820	GO:0000137	Golgi cis cisterna	CC	HDA
AT1G65820	GO:0005794	Golgi apparatus	CC	HDA
AT1G65820	GO:0000325	plant-type vacuole	CC	HDA
AT1G65820	GO:0004364	glutathione transferase activity	MF	IBA
AT1G65820	GO:0004602	glutathione peroxidase activity	MF	IBA
AT1G65820	GO:0005635	nuclear envelope	CC	IBA
AT1G66090	GO:0043531	ADP binding	MF	IEA
AT1G66090	GO:0007165	signal transduction	BP	IEA
AT1G66090	GO:0006952	defense response	BP	IEA
AT1G66090	GO:0006952	defense response	BP	IEP
AT1G66090	GO:0071456	cellular response to hypoxia	BP	HEP
AT1G67650	GO:0048500	signal recognition particle	CC	IEA
AT1G67650	GO:0006614	SRP-dependent cotranslational protein targeting to membrane	BP	IEA
AT1G67650	GO:1990904	ribonucleoprotein complex	CC	IEA
AT1G67650	GO:0005737	cytoplasm	CC	IEA
AT1G67650	GO:0008312	7S RNA binding	MF	IEA
AT1G67650	GO:0005786	signal recognition particle, endoplasmic reticulum targeting	CC	IEA
AT1G67650	GO:0005515	protein binding	MF	IEA
AT1G67650	GO:0009506	plasmodesma	CC	HDA
AT1G67650	GO:0043022	ribosome binding	MF	IBA
AT1G67650	GO:0006614	SRP-dependent cotranslational protein targeting to membrane	BP	IBA
AT1G67650	GO:0005786	signal recognition particle, endoplasmic reticulum targeting	CC	IBA
AT1G67650	GO:0008312	7S RNA binding	MF	IBA
AT1G67920	NA	NA	NA	NA
AT1G68000	GO:0016740	transferase activity	MF	IEA
AT1G68000	GO:0046872	metal ion binding	MF	IEA
AT1G68000	GO:0016020	membrane	CC	IEA
AT1G68000	GO:0006629	lipid metabolic process	BP	IEA
AT1G68000	GO:0008654	phospholipid biosynthetic process	BP	IEA
AT1G68000	GO:0003881	CDP-diacylglycerol-inositol 3-phosphatidyltransferase activity	MF	IEA
AT1G68000	GO:0016780	phosphotransferase activity, for other substituted phosphate groups	MF	IEA
AT1G68000	GO:0005794	Golgi apparatus	CC	IBA
AT1G68000	GO:0005783	endoplasmic reticulum	CC	IDA
AT1G68000	GO:0016020	membrane	CC	IDA
AT1G68000	GO:0005794	Golgi apparatus	CC	IDA
AT1G68000	GO:0008654	phospholipid biosynthetic process	BP	IDA
AT1G68000	GO:0003881	CDP-diacylglycerol-inositol 3-phosphatidyltransferase activity	MF	IBA
AT1G68000	GO:0006661	phosphatidylinositol biosynthetic process	BP	IBA
AT1G68000	GO:0003881	CDP-diacylglycerol-inositol 3-phosphatidyltransferase activity	MF	IDA
AT1G68520	GO:0046872	metal ion binding	MF	IEA
AT1G68520	GO:0005634	nucleus	CC	IEA
AT1G68520	GO:0008270	zinc ion binding	MF	IEA
AT1G68520	GO:0005634	nucleus	CC	IBA
AT1G68520	GO:0006355	regulation of DNA-templated transcription	BP	IBA
AT1G68520	GO:0005515	protein binding	MF	IEA
AT1G68520	GO:0003700	DNA-binding transcription factor activity	MF	ISS
AT1G68520	GO:0006355	regulation of DNA-templated transcription	BP	TAS
AT1G68520	GO:0000976	transcription cis-regulatory region binding	MF	IPI
AT1G68690	GO:0004714	transmembrane receptor protein tyrosine kinase activity	MF	IEA
AT1G68690	GO:0018108	peptidyl-tyrosine phosphorylation	BP	IEA
AT1G68690	GO:0016740	transferase activity	MF	IEA
AT1G68690	GO:0016020	membrane	CC	IEA
AT1G68690	GO:0000166	nucleotide binding	MF	IEA
AT1G68690	GO:0005524	ATP binding	MF	IEA
AT1G68690	GO:0016301	kinase activity	MF	IEA
AT1G68690	GO:0016310	phosphorylation	BP	IEA
AT1G68690	GO:0004672	protein kinase activity	MF	IEA
AT1G68690	GO:0006468	protein phosphorylation	BP	IEA
AT1G68690	GO:0005886	plasma membrane	CC	IEA
AT1G68690	GO:0004674	protein serine/threonine kinase activity	MF	IEA
AT1G68690	GO:0005886	plasma membrane	CC	IBA
AT1G68690	GO:0006468	protein phosphorylation	BP	IBA
AT1G68690	GO:0019901	protein kinase binding	MF	IPI
AT1G68690	GO:0106310	protein serine kinase activity	MF	IEA
AT1G68690	GO:0071456	cellular response to hypoxia	BP	HEP
AT1G69270	GO:0016740	transferase activity	MF	IEA
AT1G69270	GO:0005886	plasma membrane	CC	IEA
AT1G69270	GO:0016020	membrane	CC	IEA
AT1G69270	GO:0000166	nucleotide binding	MF	IEA
AT1G69270	GO:0005524	ATP binding	MF	IEA
AT1G69270	GO:0016301	kinase activity	MF	IEA
AT1G69270	GO:0016310	phosphorylation	BP	IEA
AT1G69270	GO:0004672	protein kinase activity	MF	IEA
AT1G69270	GO:0006468	protein phosphorylation	BP	IEA
AT1G69270	GO:0009651	response to salt stress	BP	IEP
AT1G69270	GO:0009737	response to abscisic acid	BP	IEP
AT1G69270	GO:0004674	protein serine/threonine kinase activity	MF	IEA
AT1G69270	GO:0005515	protein binding	MF	IPI
AT1G69270	GO:0009738	abscisic acid-activated signaling pathway	BP	IEA
AT1G69270	GO:0042802	identical protein binding	MF	IPI
AT1G69270	GO:0106310	protein serine kinase activity	MF	IEA
AT1G69270	GO:0005886	plasma membrane	CC	IDA
AT1G69270	GO:0009738	abscisic acid-activated signaling pathway	BP	IMP
AT1G69270	GO:0005777	peroxisome	CC	HDA
AT1G69270	GO:0009409	response to cold	BP	IEP
[truncated: 7,401 more rows]

## Sheet:  35S.Down&cr.Up GO
gene ID	GO ID	GO name	GO ontology	GO evidence
AT1G01620	GO:0005886	plasma membrane	CC	IEA
AT1G01620	GO:0016020	membrane	CC	IEA
AT1G01620	GO:0055085	transmembrane transport	BP	IEA
AT1G01620	GO:0005515	protein binding	MF	IPI
AT1G01620	GO:0015267	channel activity	MF	IEA
AT1G01620	GO:0005886	plasma membrane	CC	IBA
AT1G01620	GO:0005886	plasma membrane	CC	HDA
AT1G01620	GO:0005886	plasma membrane	CC	IDA
AT1G01620	GO:0009414	response to water deprivation	BP	IEP
AT1G01620	GO:0005576	extracellular region	CC	HDA
AT1G01620	GO:0015250	water channel activity	MF	IDA
AT1G01620	GO:0006833	water transport	BP	IDA
AT1G01620	GO:0015250	water channel activity	MF	IBA
AT1G01620	GO:0009414	response to water deprivation	BP	IBA
AT1G01970	GO:0005515	protein binding	MF	IEA
AT1G02640	GO:0016787	hydrolase activity	MF	IEA
AT1G02640	GO:0005975	carbohydrate metabolic process	BP	IEA
AT1G02640	GO:0016798	hydrolase activity, acting on glycosyl bonds	MF	IEA
AT1G02640	GO:0008152	metabolic process	BP	IEA
AT1G02640	GO:0005576	extracellular region	CC	IEA
AT1G02640	GO:0004553	hydrolase activity, hydrolyzing O-glycosyl compounds	MF	IEA
AT1G02640	GO:0045493	xylan catabolic process	BP	IEA
AT1G02640	GO:0009044	xylan 1,4-beta-xylosidase activity	MF	IEA
AT1G02640	GO:0009044	xylan 1,4-beta-xylosidase activity	MF	IBA
AT1G02640	GO:0046556	alpha-L-arabinofuranosidase activity	MF	IBA
AT1G02640	GO:0031222	arabinan catabolic process	BP	IBA
AT1G02640	GO:0045493	xylan catabolic process	BP	IBA
AT1G03600	GO:0010206	photosystem II repair	BP	IEA
AT1G03600	GO:0016020	membrane	CC	IEA
AT1G03600	GO:0009507	chloroplast	CC	IEA
AT1G03600	GO:0009536	plastid	CC	IEA
AT1G03600	GO:0009535	chloroplast thylakoid membrane	CC	IEA
AT1G03600	GO:0009579	thylakoid	CC	IEA
AT1G03600	GO:0009523	photosystem II	CC	IEA
AT1G03600	GO:0010207	photosystem II assembly	BP	IEA
AT1G03600	GO:0009507	chloroplast	CC	HDA
AT1G03600	GO:0009534	chloroplast thylakoid	CC	HDA
AT1G03600	GO:0009535	chloroplast thylakoid membrane	CC	HDA
AT1G03600	GO:0005576	extracellular region	CC	HDA
AT1G03600	GO:0009579	thylakoid	CC	HDA
AT1G03600	GO:0010206	photosystem II repair	BP	IMP
AT1G03600	GO:0009543	chloroplast thylakoid lumen	CC	IDA
AT1G03600	GO:0009543	chloroplast thylakoid lumen	CC	IBA
AT1G03600	GO:0010207	photosystem II assembly	BP	IBA
AT1G03600	GO:0071484	cellular response to light intensity	BP	IMP
AT1G03630	GO:0016020	membrane	CC	IEA
AT1G03630	GO:0016491	oxidoreductase activity	MF	IEA
AT1G03630	GO:0015979	photosynthesis	BP	IEA
AT1G03630	GO:0009507	chloroplast	CC	IEA
AT1G03630	GO:0009536	plastid	CC	IEA
AT1G03630	GO:0031969	chloroplast membrane	CC	IEA
AT1G03630	GO:0015995	chlorophyll biosynthetic process	BP	IEA
AT1G03630	GO:0016630	protochlorophyllide reductase activity	MF	IEA
AT1G03630	GO:0009941	chloroplast envelope	CC	HDA
AT1G03630	GO:0009507	chloroplast	CC	HDA
AT1G03630	GO:0009507	chloroplast	CC	NAS
AT1G03630	GO:0009534	chloroplast thylakoid	CC	HDA
AT1G03630	GO:0009535	chloroplast thylakoid membrane	CC	HDA
AT1G03630	GO:0005576	extracellular region	CC	HDA
AT1G03630	GO:0003959	NADPH dehydrogenase activity	MF	IDA
AT1G04250	GO:0006355	regulation of DNA-templated transcription	BP	IEA
AT1G04250	GO:0005634	nucleus	CC	IEA
AT1G04250	GO:0009734	auxin-activated signaling pathway	BP	IEA
AT1G04250	GO:0005634	nucleus	CC	IDA
AT1G04250	GO:0005515	protein binding	MF	IPI
AT1G04250	GO:0042802	identical protein binding	MF	IPI
AT1G04250	GO:0005515	protein binding	MF	IEA
AT1G04250	GO:0003700	DNA-binding transcription factor activity	MF	ISS
AT1G04250	GO:0009733	response to auxin	BP	IEP
AT1G04250	GO:0009733	response to auxin	BP	IMP
AT1G04250	GO:0009733	response to auxin	BP	TAS
AT1G04250	GO:0009734	auxin-activated signaling pathway	BP	TAS
AT1G04250	GO:1900057	positive regulation of leaf senescence	BP	IMP
AT1G04420	GO:0009941	chloroplast envelope	CC	HDA
AT1G04420	GO:0009507	chloroplast	CC	HDA
AT1G04420	GO:0009570	chloroplast stroma	CC	HDA
AT1G04420	GO:0005576	extracellular region	CC	HDA
[truncated: 9,377 more rows]

## Sheet: class1&DAP-seq intersection
gene ID
[truncated: 12 more rows]
