# Supplementary material for: Overexpression of SLIM1 transcription factor accelerates vegetative development in Arabidopsis thaliana
Source: Front Plant Sci. 2024 Mar 20;15:1327152. doi: 10.3389/fpls.2024.1327152 (PMC10988502; doi:10.3389/fpls.2024.1327152)
Supplement: Supplementary file 8 [file Table_3.xlsx]

## Sheet: legend
goi	genes of interest	class1 genes belonging to 1 of 6 gene sets	3 directionality classes: OXup & KOdown, OXdown & KOup, or either directionality	2 timepoints: 37DAS or 44DAS
term	GO term or KEGG pathway
DE	differentially expresssed relative to Col-0 at same timepoint	padj < 0.05
up	upregulated relative to Col-0 at same timepoint	log2FC > 0
down	downregulated relative to Col-0 at same timepoint	in contrast with Col-0 at same timepoint, log2FC < 0
35S::SLIM1 UP & slim1-cr DOWN	class1: positively regulated by SLIM1	two sets of criteria must both be met: 1) must be DE in 35S::SLIM1 #17 & DE in 35S::SLIM1 #25 & DE in slim1-cr AND 2) must be up in 35S::SLIM1 #17 & up in 35S::SLIM1 #25 & down slim1-cr
35S::SLIM1 DOWN & slim1-cr UP	class1: negatively regulated by SLIM1	two sets of criteria must both be met: 1) must be DE in 35S::SLIM1 #17 & DE in 35S::SLIM1 #25 & DE in slim1-cr AND 2) must be down in 35S::SLIM1 #17 & down in 35S::SLIM1 #25 & up slim1-cr
goi direction	positively or negatively regulated by SLIM1
goi size	genes of interest annotated to at least 1 term in the term ontology
effective universe size	number of genes annotated to the term ontology with RNA-seq Wald test results
term size	number of genes annotated to the term with RNA-seq Wald test results
goi in term	genes of interest that annotated to the term
p-value	Fisher's exact test
goi IDs in term	IDs for all goi that annotated to term

## Sheet: Fig 6
timepoint	goi direction	term ontology	goi size	effective universe size	term description	term ID	term size	goi in term	p-value	FDR	q-value	goi IDs in term
37DAS	either direction	KEGG pathway	74	4630	Plant-pathogen interaction	KEGG:ath04626	172	20	8.6513e-13	3.63355e-11	3.27839e-11	AT1G12220/AT1G18890/AT2G30250/AT2G38470/AT2G41100/AT2G41410/AT3G01830/AT3G03000/AT3G17700/AT3G20410/AT3G22930/AT3G25070/AT3G25600/AT3G45640/AT4G01010/AT4G23570/AT4G26090/AT4G35310/AT4G39090/AT5G42380
37DAS	either direction	KEGG pathway	74	4630	Ribosome	KEGG:ath03010	307	1	0.994017	0.994017	0.896857	AT1G29970
37DAS	35S::SLIM1 UP & slim1-cr DOWN	KEGG pathway	70	4630	Plant-pathogen interaction	KEGG:ath04626	172	20	2.7038e-13	1.08152e-11	9.67675e-12	AT1G12220/AT1G18890/AT2G30250/AT2G38470/AT2G41100/AT2G41410/AT3G01830/AT3G03000/AT3G17700/AT3G20410/AT3G22930/AT3G25070/AT3G25600/AT3G45640/AT4G01010/AT4G23570/AT4G26090/AT4G35310/AT4G39090/AT5G42380
37DAS	35S::SLIM1 UP & slim1-cr DOWN	KEGG pathway	70	4630	Ribosome	KEGG:ath03010	307	1	0.992092	0.992092	0.887662	AT1G29970
37DAS	either direction	GO Biological Process	375	16746	cellular response to hypoxia	GO:0071456	232	48	1.23503e-32	5.63176e-30	4.55013e-30	AT1G07135/AT1G10140/AT1G13260/AT1G14200/AT1G19020/AT1G23710/AT1G25560/AT1G26800/AT1G27730/AT1G35140/AT1G66090/AT1G68690/AT1G69890/AT1G72900/AT1G73500/AT1G74940/AT2G18670/AT2G26560/AT2G32200/AT2G36220/AT2G40000/AT2G41100/AT2G46500/AT2G47730/AT3G04640/AT3G13310/AT3G46090/AT4G12720/AT4G13395/AT4G23570/AT4G24570/AT4G27280/AT4G27470/AT4G30280/AT4G34150/AT5G04340/AT5G06320/AT5G13190/AT5G19240/AT5G25250…
37DAS	either direction	GO Biological Process	375	16746	defense response to bacterium	GO:0042742	318	33	2.16456e-13	4.93519e-11	3.98734e-11	AT1G12220/AT1G15530/AT1G18570/AT1G22890/AT1G64280/AT1G79380/AT1G80840/AT2G22300/AT2G32800/AT2G38470/AT2G40000/AT2G43120/AT3G05200/AT3G10930/AT3G25070/AT3G50950/AT3G59700/AT4G04960/AT4G12720/AT4G23220/AT4G26090/AT4G26120/AT4G34390/AT4G39090/AT5G04720/AT5G05300/AT5G06320/AT5G22540/AT5G24210/AT5G26920/AT5G27420/AT5G45110/AT5G48380
37DAS	either direction	GO Biological Process	375	16746	plant-type hypersensitive response	GO:0009626	76	13	1.23558e-08	1.87808e-06	1.51738e-06	AT1G12220/AT1G28380/AT1G29690/AT1G64280/AT2G26560/AT3G25070/AT3G45640/AT3G50470/AT3G50930/AT4G12720/AT4G26090/AT5G14930/AT5G26920
37DAS	either direction	GO Biological Process	375	16746	positive regulation of leaf senescence	GO:1900057	18	6	1.79106e-06	0.000204181	0.000164966	AT1G19270/AT1G34180/AT3G04060/AT3G19290/AT5G14930/AT5G39610
37DAS	either direction	GO Biological Process	375	16746	signal transduction	GO:0007165	334	22	6.80212e-06	0.000620353	0.000501209	AT1G17600/AT1G22930/AT1G29290/AT1G66090/AT1G72900/AT1G72930/AT2G14080/AT2G20142/AT2G32140/AT3G04220/AT3G20410/AT3G27560/AT3G44400/AT3G46930/AT4G14370/AT4G34390/AT5G26751/AT5G41740/AT5G41750/AT5G58120/AT5G58650/AT5G61530
37DAS	either direction	GO Biological Process	375	16746	response to wounding	GO:0009611	199	16	1.09289e-05	0.000830598	0.000671074	AT1G19020/AT1G27730/AT1G64280/AT1G73500/AT1G79380/AT1G80840/AT2G32800/AT3G14050/AT3G45640/AT3G61060/AT3G61190/AT4G02380/AT5G06320/AT5G08790/AT5G59820/AT5G67480
37DAS	either direction	GO Biological Process	375	16746	response to salt stress	GO:0009651	350	22	1.41958e-05	0.000924753	0.000747146	AT1G22890/AT1G27730/AT1G28380/AT1G69270/AT1G73500/AT2G15390/AT2G30250/AT2G38470/AT2G46500/AT3G10930/AT3G12360/AT3G19290/AT3G21780/AT3G60140/AT4G12720/AT4G39090/AT5G05300/AT5G22270/AT5G26751/AT5G39610/AT5G67480/AT5G46830
37DAS	either direction	GO Biological Process	375	16746	exocytosis	GO:0006887	41	7	3.11342e-05	0.00177465	0.00143381	AT1G07000/AT1G54090/AT3G11820/AT3G14090/AT3G52400/AT4G02350/AT5G03540
37DAS	either direction	GO Biological Process	375	16746	cellular glucan metabolic process	GO:0006073	29	6	3.72043e-05	0.00188502	0.00152298	AT1G32170/AT2G01850/AT4G25810/AT4G30280/AT5G57550/AT5G57560
37DAS	either direction	GO Biological Process	375	16746	defense response to other organism	GO:0098542	61	8	6.13139e-05	0.00279592	0.00225893	AT1G14200/AT1G29340/AT3G05200/AT3G49530/AT4G26090/AT5G04720/AT5G06320/AT5G27420
37DAS	either direction	GO Biological Process	375	16746	response to bacterium	GO:0009617	129	11	0.000154057	0.00628202	0.0050755	AT1G07000/AT1G18570/AT1G19020/AT1G22890/AT1G64280/AT2G32800/AT3G45640/AT3G50930/AT4G34390/AT5G06320/AT5G26920
37DAS	either direction	GO Biological Process	375	16746	cell wall biogenesis	GO:0042546	53	7	0.000169525	0.00628202	0.0050755	AT1G32170/AT2G01850/AT2G15390/AT4G25810/AT4G30280/AT5G57550/AT5G57560
37DAS	either direction	GO Biological Process	375	16746	response to oxidative stress	GO:0006979	254	16	0.000204256	0.00628202	0.0050755	AT1G14870/AT1G19020/AT1G27730/AT2G24550/AT2G40000/AT3G28340/AT3G45640/AT3G46090/AT4G02380/AT4G11850/AT4G12720/AT4G17070/AT4G20830/AT5G21940/AT5G39610/AT5G59820
37DAS	either direction	GO Biological Process	375	16746	response to molecule of bacterial origin	GO:0002237	39	6	0.000211572	0.00628202	0.0050755	AT1G07000/AT1G16670/AT1G80840/AT3G25070/AT3G50930/AT5G26920
37DAS	either direction	GO Biological Process	375	16746	protein autophosphorylation	GO:0046777	157	12	0.000220422	0.00628202	0.0050755	AT1G12970/AT1G16670/AT1G18890/AT1G70520/AT1G73500/AT2G01450/AT2G31800/AT2G46500/AT3G20410/AT3G59700/AT4G08920/AT4G35310
37DAS	either direction	GO Biological Process	375	16746	steroid metabolic process	GO:0008202	36	1	0.557887	0.673006	0.543749	AT2G34500
37DAS	either direction	GO Biological Process	375	16746	photosynthesis	GO:0015979	133	3	0.575308	0.688557	0.556313	AT1G27730/AT1G54130/AT4G15530
37DAS	either direction	GO Biological Process	375	16746	steroid biosynthetic process	GO:0006694	40	1	0.596261	0.706221	0.570585	AT2G34500
37DAS	either direction	GO Biological Process	375	16746	sterol biosynthetic process	GO:0016126	42	1	0.614184	0.719968	0.581692	AT2G34500
37DAS	either direction	GO Biological Process	375	16746	thylakoid membrane organization	GO:0010027	48	1	0.663328	0.75809	0.612492	AT2G30440
37DAS	either direction	GO Biological Process	375	16746	chloroplast organization	GO:0009658	181	1	0.983783	0.993222	0.802465	AT5G58650
37DAS	either direction	GO Biological Process	375	16746	translation	GO:0006412	474	3	0.998615	0.998615	0.806822	AT1G29970/AT1G30755/AT3G12915
37DAS	35S::SLIM1 UP & slim1-cr DOWN	GO Biological Process	358	16746	cellular response to hypoxia	GO:0071456	232	48	1.3744e-33	6.17105e-31	5.02018e-31	AT1G07135/AT1G10140/AT1G13260/AT1G14200/AT1G19020/AT1G23710/AT1G25560/AT1G26800/AT1G27730/AT1G35140/AT1G66090/AT1G68690/AT1G69890/AT1G72900/AT1G73500/AT1G74940/AT2G18670/AT2G26560/AT2G32200/AT2G36220/AT2G40000/AT2G41100/AT2G46500/AT2G47730/AT3G04640/AT3G13310/AT3G46090/AT4G12720/AT4G13395/AT4G23570/AT4G24570/AT4G27280/AT4G27470/AT4G30280/AT4G34150/AT5G04340/AT5G06320/AT5G13190/AT5G19240/AT5G25250…
37DAS	35S::SLIM1 UP & slim1-cr DOWN	GO Biological Process	358	16746	defense response to bacterium	GO:0042742	318	33	5.81457e-14	1.30537e-11	1.06192e-11	AT1G12220/AT1G15530/AT1G18570/AT1G22890/AT1G64280/AT1G79380/AT1G80840/AT2G22300/AT2G32800/AT2G38470/AT2G40000/AT2G43120/AT3G05200/AT3G10930/AT3G25070/AT3G50950/AT3G59700/AT4G04960/AT4G12720/AT4G23220/AT4G26090/AT4G26120/AT4G34390/AT4G39090/AT5G04720/AT5G05300/AT5G06320/AT5G22540/AT5G24210/AT5G26920/AT5G27420/AT5G45110/AT5G48380
37DAS	35S::SLIM1 UP & slim1-cr DOWN	GO Biological Process	358	16746	plant-type hypersensitive response	GO:0009626	76	13	7.10793e-09	1.06382e-06	8.65422e-07	AT1G12220/AT1G28380/AT1G29690/AT1G64280/AT2G26560/AT3G25070/AT3G45640/AT3G50470/AT3G50930/AT4G12720/AT4G26090/AT5G14930/AT5G26920
37DAS	35S::SLIM1 UP & slim1-cr DOWN	GO Biological Process	358	16746	positive regulation of leaf senescence	GO:1900057	18	6	1.3677e-06	0.000153524	0.000124893	AT1G19270/AT1G34180/AT3G04060/AT3G19290/AT5G14930/AT5G39610
37DAS	35S::SLIM1 UP & slim1-cr DOWN	GO Biological Process	358	16746	signal transduction	GO:0007165	334	22	3.2329e-06	0.000290315	0.000236172	AT1G17600/AT1G22930/AT1G29290/AT1G66090/AT1G72900/AT1G72930/AT2G14080/AT2G20142/AT2G32140/AT3G04220/AT3G20410/AT3G27560/AT3G44400/AT3G46930/AT4G14370/AT4G34390/AT5G26751/AT5G41740/AT5G41750/AT5G58120/AT5G58650/AT5G61530
37DAS	35S::SLIM1 UP & slim1-cr DOWN	GO Biological Process	358	16746	response to wounding	GO:0009611	199	16	6.11103e-06	0.000457309	0.000372023	AT1G19020/AT1G27730/AT1G64280/AT1G73500/AT1G79380/AT1G80840/AT2G32800/AT3G14050/AT3G45640/AT3G61060/AT3G61190/AT4G02380/AT5G06320/AT5G08790/AT5G59820/AT5G67480
37DAS	35S::SLIM1 UP & slim1-cr DOWN	GO Biological Process	358	16746	response to salt stress	GO:0009651	350	21	2.22963e-05	0.00129846	0.0010563	AT1G22890/AT1G27730/AT1G28380/AT1G69270/AT1G73500/AT2G15390/AT2G30250/AT2G38470/AT2G46500/AT3G10930/AT3G12360/AT3G19290/AT3G21780/AT3G60140/AT4G12720/AT4G39090/AT5G05300/AT5G22270/AT5G26751/AT5G39610/AT5G67480
37DAS	35S::SLIM1 UP & slim1-cr DOWN	GO Biological Process	358	16746	exocytosis	GO:0006887	41	7	2.31351e-05	0.00129846	0.0010563	AT1G07000/AT1G54090/AT3G11820/AT3G14090/AT3G52400/AT4G02350/AT5G03540
37DAS	35S::SLIM1 UP & slim1-cr DOWN	GO Biological Process	358	16746	cellular glucan metabolic process	GO:0006073	29	6	2.86849e-05	0.00143106	0.00116417	AT1G32170/AT2G01850/AT4G25810/AT4G30280/AT5G57550/AT5G57560
37DAS	35S::SLIM1 UP & slim1-cr DOWN	GO Biological Process	358	16746	defense response to other organism	GO:0098542	61	8	4.42313e-05	0.00198598	0.00161561	AT1G14200/AT1G29340/AT3G05200/AT3G49530/AT4G26090/AT5G04720/AT5G06320/AT5G27420
37DAS	35S::SLIM1 UP & slim1-cr DOWN	GO Biological Process	358	16746	response to bacterium	GO:0009617	129	11	0.000102528	0.00418499	0.00340451	AT1G07000/AT1G18570/AT1G19020/AT1G22890/AT1G64280/AT2G32800/AT3G45640/AT3G50930/AT4G34390/AT5G06320/AT5G26920
37DAS	35S::SLIM1 UP & slim1-cr DOWN	GO Biological Process	358	16746	response to oxidative stress	GO:0006979	254	16	0.000120305	0.00439717	0.00357712	AT1G14870/AT1G19020/AT1G27730/AT2G24550/AT2G40000/AT3G28340/AT3G45640/AT3G46090/AT4G02380/AT4G11850/AT4G12720/AT4G17070/AT4G20830/AT5G21940/AT5G39610/AT5G59820
37DAS	35S::SLIM1 UP & slim1-cr DOWN	GO Biological Process	358	16746	cell wall biogenesis	GO:0042546	53	7	0.000127312	0.00439717	0.00357712	AT1G32170/AT2G01850/AT2G15390/AT4G25810/AT4G30280/AT5G57550/AT5G57560
37DAS	35S::SLIM1 UP & slim1-cr DOWN	GO Biological Process	358	16746	protein autophosphorylation	GO:0046777	157	12	0.000143536	0.00460342	0.0037449	AT1G12970/AT1G16670/AT1G18890/AT1G70520/AT1G73500/AT2G01450/AT2G31800/AT2G46500/AT3G20410/AT3G59700/AT4G08920/AT4G35310
37DAS	35S::SLIM1 UP & slim1-cr DOWN	GO Biological Process	358	16746	response to molecule of bacterial origin	GO:0002237	39	6	0.000164545	0.00492538	0.00400681	AT1G07000/AT1G16670/AT1G80840/AT3G25070/AT3G50930/AT5G26920
37DAS	35S::SLIM1 UP & slim1-cr DOWN	GO Biological Process	358	16746	steroid metabolic process	GO:0008202	36	1	0.541037	0.658335	0.535558	AT2G34500
37DAS	35S::SLIM1 UP & slim1-cr DOWN	GO Biological Process	358	16746	photosynthesis	GO:0015979	133	3	0.543731	0.659825	0.53677	AT1G27730/AT1G54130/AT4G15530
37DAS	35S::SLIM1 UP & slim1-cr DOWN	GO Biological Process	358	16746	steroid biosynthetic process	GO:0006694	40	1	0.579126	0.691563	0.562589	AT2G34500
37DAS	35S::SLIM1 UP & slim1-cr DOWN	GO Biological Process	358	16746	sterol biosynthetic process	GO:0016126	42	1	0.596971	0.705369	0.57382	AT2G34500
37DAS	35S::SLIM1 UP & slim1-cr DOWN	GO Biological Process	358	16746	thylakoid membrane organization	GO:0010027	48	1	0.646106	0.738172	0.600505	AT2G30440
37DAS	35S::SLIM1 UP & slim1-cr DOWN	GO Biological Process	358	16746	chloroplast organization	GO:0009658	181	1	0.980412	0.991927	0.806936	AT5G58650
37DAS	35S::SLIM1 UP & slim1-cr DOWN	GO Biological Process	358	16746	translation	GO:0006412	474	2	0.999642	0.999642	0.813213	AT1G29970/AT1G30755
37DAS	35S::SLIM1 DOWN & slim1-cr UP	GO Biological Process	17	16746	response to salt stress	GO:0009651	350	1	0.301799	0.354475	0.214833	AT5G46830
37DAS	35S::SLIM1 DOWN & slim1-cr UP	GO Biological Process	17	16746	translation	GO:0006412	474	1	0.386373	0.386373	0.234165	AT3G12915
37DAS	either direction	GO Molecular Function	402	17695	ADP binding	GO:0043531	152	18	1.13075e-08	2.32934e-06	2.10676e-06	AT1G12220/AT1G15890/AT1G17600/AT1G59620/AT1G63350/AT1G66090/AT1G72900/AT2G14080/AT3G04220/AT3G25510/AT3G44400/AT3G50950/AT4G14370/AT4G26090/AT5G04720/AT5G41740/AT5G41750/AT5G58120
37DAS	either direction	GO Molecular Function	402	17695	ubiquitin protein ligase activity	GO:0061630	202	16	1.59008e-05	0.00142414	0.00128806	AT1G14200/AT1G26800/AT1G78420/AT1G79380/AT2G35930/AT3G02840/AT3G11840/AT3G13430/AT3G16720/AT3G47160/AT4G27470/AT5G24870/AT5G56340/AT5G58787/AT5G65920/AT5G66070
37DAS	either direction	GO Molecular Function	402	17695	xyloglucan:xyloglucosyl transferase activity	GO:0016762	26	6	2.07399e-05	0.00142414	0.00128806	AT1G32170/AT2G01850/AT4G25810/AT4G30280/AT5G57550/AT5G57560
37DAS	either direction	GO Molecular Function	402	17695	ubiquitin-protein transferase activity	GO:0004842	255	17	7.84002e-05	0.00403761	0.0036518	AT1G02610/AT1G14400/AT1G29340/AT1G79380/AT2G35930/AT3G05200/AT3G11840/AT3G16720/AT3G47550/AT3G47820/AT4G23450/AT4G27470/AT5G27420/AT5G57035/AT5G61560/AT5G65200/AT5G65920
37DAS	either direction	GO Molecular Function	402	17695	polysaccharide binding	GO:0030247	67	8	0.000133809	0.00551295	0.00498616	AT1G16110/AT1G18390/AT1G32170/AT2G01850/AT4G25810/AT4G30280/AT5G57550/AT5G57560
37DAS	either direction	GO Molecular Function	402	17695	peptidyl-prolyl cis-trans isomerase activity	GO:0003755	59	1	0.742849	0.889691	0.804677	AT4G17070
37DAS	either direction	GO Molecular Function	402	17695	transmembrane transporter activity	GO:0022857	313	5	0.842368	0.943086	0.85297	AT1G20840/AT1G22570/AT2G03530/AT4G24570/AT4G36790
37DAS	either direction	GO Molecular Function	402	17695	antiporter activity	GO:0015297	139	1	0.959519	0.987852	0.893458	AT4G24570
37DAS	either direction	GO Molecular Function	402	17695	isomerase activity	GO:0016853	231	2	0.969216	0.987852	0.893458	AT3G47800/AT4G17070
37DAS	either direction	GO Molecular Function	402	17695	ligase activity	GO:0016874	204	1	0.991044	0.998545	0.903129	AT5G16370
37DAS	either direction	GO Molecular Function	402	17695	structural constituent of ribosome	GO:0003735	360	1	0.999766	0.999766	0.904234	AT1G29970
37DAS	35S::SLIM1 UP & slim1-cr DOWN	GO Molecular Function	380	17695	ADP binding	GO:0043531	152	18	4.71181e-09	9.47074e-07	8.63005e-07	AT1G12220/AT1G15890/AT1G17600/AT1G59620/AT1G63350/AT1G66090/AT1G72900/AT2G14080/AT3G04220/AT3G25510/AT3G44400/AT3G50950/AT4G14370/AT4G26090/AT5G04720/AT5G41740/AT5G41750/AT5G58120
37DAS	35S::SLIM1 UP & slim1-cr DOWN	GO Molecular Function	380	17695	ubiquitin protein ligase activity	GO:0061630	202	16	7.9077e-06	0.000794723	0.000724178	AT1G14200/AT1G26800/AT1G78420/AT1G79380/AT2G35930/AT3G02840/AT3G11840/AT3G13430/AT3G16720/AT3G47160/AT4G27470/AT5G24870/AT5G56340/AT5G58787/AT5G65920/AT5G66070
37DAS	35S::SLIM1 UP & slim1-cr DOWN	GO Molecular Function	380	17695	xyloglucan:xyloglucosyl transferase activity	GO:0016762	26	6	1.50859e-05	0.00101075	0.000921032	AT1G32170/AT2G01850/AT4G25810/AT4G30280/AT5G57550/AT5G57560
37DAS	35S::SLIM1 UP & slim1-cr DOWN	GO Molecular Function	380	17695	ubiquitin-protein transferase activity	GO:0004842	255	17	3.91133e-05	0.00196544	0.00179098	AT1G02610/AT1G14400/AT1G29340/AT1G79380/AT2G35930/AT3G05200/AT3G11840/AT3G16720/AT3G47550/AT3G47820/AT4G23450/AT4G27470/AT5G27420/AT5G57035/AT5G61560/AT5G65200/AT5G65920
37DAS	35S::SLIM1 UP & slim1-cr DOWN	GO Molecular Function	380	17695	polysaccharide binding	GO:0030247	67	8	9.07071e-05	0.00364643	0.00332274	AT1G16110/AT1G18390/AT1G32170/AT2G01850/AT4G25810/AT4G30280/AT5G57550/AT5G57560
37DAS	35S::SLIM1 UP & slim1-cr DOWN	GO Molecular Function	380	17695	peptidyl-prolyl cis-trans isomerase activity	GO:0003755	59	1	0.722783	0.880481	0.802324	AT4G17070
37DAS	35S::SLIM1 UP & slim1-cr DOWN	GO Molecular Function	380	17695	transmembrane transporter activity	GO:0022857	313	5	0.805564	0.928016	0.845639	AT1G20840/AT1G22570/AT2G03530/AT4G24570/AT4G36790
37DAS	35S::SLIM1 UP & slim1-cr DOWN	GO Molecular Function	380	17695	antiporter activity	GO:0015297	139	1	0.95166	0.988505	0.900758	AT4G24570
37DAS	35S::SLIM1 UP & slim1-cr DOWN	GO Molecular Function	380	17695	isomerase activity	GO:0016853	231	2	0.960582	0.989813	0.901951	AT3G47800/AT4G17070
37DAS	35S::SLIM1 UP & slim1-cr DOWN	GO Molecular Function	380	17695	ligase activity	GO:0016874	204	1	0.988374	0.996037	0.907622	AT5G16370
37DAS	35S::SLIM1 UP & slim1-cr DOWN	GO Molecular Function	380	17695	structural constituent of ribosome	GO:0003735	360	1	0.999628	0.999628	0.910894	AT1G29970
37DAS	either direction	GO Cellular Component	375	16858	cell wall	GO:0005618	27	6	2.31959e-05	0.00155412	0.001465	AT1G32170/AT2G01850/AT4G25810/AT4G30280/AT5G57550/AT5G57560
37DAS	either direction	GO Cellular Component	375	16858	apoplast	GO:0048046	394	16	0.0155235	0.208015	0.196086	AT1G09560/AT1G22890/AT1G29290/AT1G32170/AT1G35140/AT1G72150/AT2G01850/AT4G08950/AT4G15800/AT4G20830/AT4G25810/AT4G30280/AT5G57550/AT5G57560/AT2G36530/AT5G38940
37DAS	either direction	GO Cellular Component	375	16858	stromule	GO:0010319	36	1	0.555453	0.877741	0.827407	AT2G47730
37DAS	either direction	GO Cellular Component	375	16858	chloroplast membrane	GO:0031969	160	1	0.973126	0.998002	0.940772	AT1G02660
37DAS	either direction	GO Cellular Component	375	16858	thylakoid	GO:0009579	355	3	0.986538	0.998002	0.940772	AT2G30440/AT2G47730/AT3G17700
37DAS	either direction	GO Cellular Component	375	16858	chloroplast thylakoid	GO:0009534	213	1	0.991952	0.998002	0.940772	AT2G30440
37DAS	either direction	GO Cellular Component	375	16858	ribosome	GO:0005840	389	3	0.992731	0.998002	0.940772	AT1G29970/AT5G15260/AT3G12915
37DAS	either direction	GO Cellular Component	375	16858	chloroplast thylakoid membrane	GO:0009535	373	2	0.998002	0.998002	0.940772	AT2G30440/AT3G17700
37DAS	35S::SLIM1 UP & slim1-cr DOWN	GO Cellular Component	355	16858	cell wall	GO:0005618	27	6	1.70209e-05	0.00112338	0.001075	AT1G32170/AT2G01850/AT4G25810/AT4G30280/AT5G57550/AT5G57560
37DAS	35S::SLIM1 UP & slim1-cr DOWN	GO Cellular Component	355	16858	apoplast	GO:0048046	394	14	0.0401464	0.441611	0.422594	AT1G09560/AT1G22890/AT1G29290/AT1G32170/AT1G35140/AT1G72150/AT2G01850/AT4G08950/AT4G15800/AT4G20830/AT4G25810/AT4G30280/AT5G57550/AT5G57560
37DAS	35S::SLIM1 UP & slim1-cr DOWN	GO Cellular Component	355	16858	stromule	GO:0010319	36	1	0.535595	0.867371	0.83002	AT2G47730
37DAS	35S::SLIM1 UP & slim1-cr DOWN	GO Cellular Component	355	16858	chloroplast membrane	GO:0031969	160	1	0.967341	0.997798	0.954831	AT1G02660
37DAS	35S::SLIM1 UP & slim1-cr DOWN	GO Cellular Component	355	16858	thylakoid	GO:0009579	355	3	0.981149	0.997798	0.954831	AT2G30440/AT2G47730/AT3G17700
37DAS	35S::SLIM1 UP & slim1-cr DOWN	GO Cellular Component	355	16858	chloroplast thylakoid	GO:0009534	213	1	0.989563	0.997798	0.954831	AT2G30440
37DAS	35S::SLIM1 UP & slim1-cr DOWN	GO Cellular Component	355	16858	chloroplast thylakoid membrane	GO:0009535	373	2	0.996998	0.997798	0.954831	AT2G30440/AT3G17700
37DAS	35S::SLIM1 UP & slim1-cr DOWN	GO Cellular Component	355	16858	ribosome	GO:0005840	389	2	0.997798	0.997798	0.954831	AT1G29970/AT5G15260
37DAS	35S::SLIM1 DOWN & slim1-cr UP	GO Cellular Component	20	16858	apoplast	GO:0048046	394	2	0.0785158	0.172735	0.132237	AT2G36530/AT5G38940
37DAS	35S::SLIM1 DOWN & slim1-cr UP	GO Cellular Component	20	16858	ribosome	GO:0005840	389	1	0.37323	0.383057	0.29325	AT3G12915
44DAS	either direction	KEGG pathway	351	4630	Porphyrin metabolism	KEGG:ath00860	52	20	3.07853e-10	3.44795e-08	3.11093e-08	AT2G44520/AT4G11910/AT1G03630/AT1G08520/AT1G44000/AT1G44446/AT1G74470/AT2G40490/AT3G14930/AT3G48730/AT3G51820/AT3G56940/AT4G01690/AT4G18480/AT4G25080/AT4G27440/AT5G08280/AT5G13630/AT5G18660/AT5G45930
44DAS	either direction	KEGG pathway	351	4630	Aminoacyl-tRNA biosynthesis	KEGG:ath00970	52	15	3.90703e-06	0.000218794	0.000197408	AT1G11870/AT1G48520/AT2G25840/AT2G31170/AT3G02660/AT3G25660/AT3G48110/AT3G58140/AT3G62120/AT4G04350/AT4G17300/AT4G32915/AT5G16715/AT5G22800/AT5G49030
44DAS	either direction	KEGG pathway	351	4630	Photosynthesis	KEGG:ath00195	45	13	1.7155e-05	0.000640452	0.000577851	AT1G03600/AT1G10960/AT1G30380/AT1G32550/AT1G44575/AT1G52230/AT1G60950/AT4G02770/AT4G09650/AT4G21280/AT4G28660/AT5G45040/AT5G64040
44DAS	either direction	KEGG pathway	351	4630	Ribosome	KEGG:ath03010	307	41	0.000187479	0.00524941	0.00473631	AT1G05190/AT1G07320/AT1G29070/AT1G32990/AT1G35680/AT1G48350/AT1G64510/AT1G74970/AT1G75350/AT1G78630/AT1G79850/AT2G18400/AT2G24090/AT2G27720/AT2G33450/AT2G33800/AT2G34520/AT2G36620/AT2G40010/AT2G43030/AT3G02080/AT3G13120/AT3G15190/AT3G25920/AT3G27830/AT3G44890/AT3G54210/AT3G63490/AT4G00810/AT4G01310/AT4G17560/AT4G34620/AT5G02450/AT5G13510/AT5G14320/AT5G30510/AT5G40950/AT5G47190/AT5G47700/AT5G54600…
44DAS	either direction	KEGG pathway	351	4630	Plant-pathogen interaction	KEGG:ath04626	172	15	0.322772	0.935895	0.844417	AT1G51660/AT2G17290/AT2G46430/AT3G17700/AT3G57530/AT4G01010/AT4G08500/AT4G16190/AT5G45260/AT5G47910/AT5G52640/AT1G12310/AT1G25450/AT2G24610/AT4G20360
44DAS	35S::SLIM1 UP & slim1-cr DOWN	KEGG pathway	101	4630	Plant-pathogen interaction	KEGG:ath04626	172	11	0.00117182	0.100776	0.0962123	AT1G51660/AT2G17290/AT2G46430/AT3G17700/AT3G57530/AT4G01010/AT4G08500/AT4G16190/AT5G45260/AT5G47910/AT5G52640
44DAS	35S::SLIM1 UP & slim1-cr DOWN	KEGG pathway	101	4630	Porphyrin metabolism	KEGG:ath00860	52	2	0.314286	0.601784	0.574531	AT2G44520/AT4G11910
44DAS	35S::SLIM1 DOWN & slim1-cr UP	KEGG pathway	250	4630	Porphyrin metabolism	KEGG:ath00860	52	18	6.80827e-11	6.6721e-09	5.73328e-09	AT1G03630/AT1G08520/AT1G44000/AT1G44446/AT1G74470/AT2G40490/AT3G14930/AT3G48730/AT3G51820/AT3G56940/AT4G01690/AT4G18480/AT4G25080/AT4G27440/AT5G08280/AT5G13630/AT5G18660/AT5G45930
44DAS	35S::SLIM1 DOWN & slim1-cr UP	KEGG pathway	250	4630	Ribosome	KEGG:ath03010	307	41	2.78055e-08	1.36247e-06	1.17076e-06	AT1G05190/AT1G07320/AT1G29070/AT1G32990/AT1G35680/AT1G48350/AT1G64510/AT1G74970/AT1G75350/AT1G78630/AT1G79850/AT2G18400/AT2G24090/AT2G27720/AT2G33450/AT2G33800/AT2G34520/AT2G36620/AT2G40010/AT2G43030/AT3G02080/AT3G13120/AT3G15190/AT3G25920/AT3G27830/AT3G44890/AT3G54210/AT3G63490/AT4G00810/AT4G01310/AT4G17560/AT4G34620/AT5G02450/AT5G13510/AT5G14320/AT5G30510/AT5G40950/AT5G47190/AT5G47700/AT5G54600…
44DAS	35S::SLIM1 DOWN & slim1-cr UP	KEGG pathway	250	4630	Aminoacyl-tRNA biosynthesis	KEGG:ath00970	52	15	4.72844e-08	1.54463e-06	1.32728e-06	AT1G11870/AT1G48520/AT2G25840/AT2G31170/AT3G02660/AT3G25660/AT3G48110/AT3G58140/AT3G62120/AT4G04350/AT4G17300/AT4G32915/AT5G16715/AT5G22800/AT5G49030
44DAS	35S::SLIM1 DOWN & slim1-cr UP	KEGG pathway	250	4630	Photosynthesis	KEGG:ath00195	45	13	3.76348e-07	9.22052e-06	7.92311e-06	AT1G03600/AT1G10960/AT1G30380/AT1G32550/AT1G44575/AT1G52230/AT1G60950/AT4G02770/AT4G09650/AT4G21280/AT4G28660/AT5G45040/AT5G64040
44DAS	35S::SLIM1 DOWN & slim1-cr UP	KEGG pathway	250	4630	Plant-pathogen interaction	KEGG:ath04626	172	4	0.986055	0.999981	0.859275	AT1G12310/AT1G25450/AT2G24610/AT4G20360
44DAS	either direction	GO Biological Process	1024	16746	chlorophyll biosynthetic process	GO:0015995	42	22	2.54899e-16	1.79635e-13	1.66358e-13	AT1G03630/AT1G08520/AT1G10670/AT1G44446/AT1G74470/AT2G40490/AT3G14110/AT3G14930/AT3G48730/AT3G51820/AT3G56940/AT4G01690/AT4G15560/AT4G18480/AT4G25080/AT4G27430/AT4G27440/AT5G08280/AT5G13630/AT5G16440/AT5G18660/AT5G45930
44DAS	either direction	GO Biological Process	1024	16746	photosynthesis	GO:0015979	133	38	3.92646e-16	1.79635e-13	1.66358e-13	AT1G61800/AT1G03630/AT1G08520/AT1G15820/AT1G29910/AT1G30380/AT1G44575/AT1G52230/AT1G67090/AT1G74470/AT1G76450/AT1G77090/AT2G20890/AT2G26550/AT2G28605/AT3G08940/AT3G21055/AT3G27690/AT3G54050/AT3G56940/AT4G02770/AT4G09650/AT4G15510/AT4G17600/AT4G18480/AT4G21280/AT4G27440/AT4G28660/AT4G34190/AT5G11450/AT5G13630/AT5G16440/AT5G27390/AT5G38430/AT5G45040/AT5G45930/AT5G54270/AT5G64040
44DAS	either direction	GO Biological Process	1024	16746	translation	GO:0006412	474	60	6.24122e-08	1.90357e-05	1.76287e-05	AT1G17440/AT4G11160/AT5G47880/AT1G05190/AT1G07320/AT1G11870/AT1G29070/AT1G32990/AT1G35680/AT1G48350/AT1G48520/AT1G64510/AT1G74970/AT1G75350/AT1G78630/AT1G79850/AT2G18400/AT2G24090/AT2G25840/AT2G31170/AT2G33450/AT2G33800/AT2G34520/AT2G43030/AT3G02080/AT3G02660/AT3G08740/AT3G13120/AT3G15190/AT3G25660/AT3G25920/AT3G27160/AT3G27830/AT3G44890/AT3G48110/AT3G54210/AT3G58140/AT3G62120/AT3G62910/AT3G63490…
44DAS	either direction	GO Biological Process	1024	16746	thylakoid membrane organization	GO:0010027	48	14	6.36038e-07	0.000145494	0.00013474	AT1G24490/AT1G30475/AT1G35680/AT1G44575/AT1G56190/AT2G07050/AT2G20890/AT3G26900/AT3G62910/AT4G20130/AT5G08050/AT5G22830/AT5G24314/AT5G53860
44DAS	either direction	GO Biological Process	1024	16746	reductive pentose-phosphate cycle	GO:0019253	20	9	1.04943e-06	0.000192046	0.000177851	AT1G12900/AT1G42970/AT1G56190/AT1G67090/AT2G21170/AT3G04790/AT3G54050/AT3G55800/AT5G38430
44DAS	either direction	GO Biological Process	1024	16746	plastid translation	GO:0032544	21	9	1.73688e-06	0.000264875	0.000245297	AT1G79850/AT2G33800/AT2G38140/AT2G39140/AT3G56910/AT3G62910/AT4G31850/AT5G10900/AT5G54600
44DAS	either direction	GO Biological Process	1024	16746	chloroplast organization	GO:0009658	181	28	5.18655e-06	0.000677956	0.000627846	AT1G24490/AT1G30475/AT5G59220/AT1G08540/AT1G11870/AT1G35680/AT1G44000/AT2G21170/AT2G25870/AT2G34620/AT2G36000/AT2G47940/AT3G19180/AT3G19570/AT3G26900/AT3G52750/AT3G56940/AT3G62910/AT4G01800/AT4G13670/AT4G20130/AT4G20360/AT4G23940/AT5G08050/AT5G13770/AT5G22640/AT5G24314/AT5G45390
44DAS	either direction	GO Biological Process	1024	16746	chloroplast rRNA processing	GO:1901259	22	8	2.81241e-05	0.00321669	0.00297893	AT1G06190/AT1G12800/AT2G25870/AT2G33800/AT2G37220/AT3G28460/AT3G52150/AT4G24770
44DAS	either direction	GO Biological Process	1024	16746	steroid metabolic process	GO:0008202	36	9	0.000242014	0.0221443	0.0205075	AT1G10030/AT1G47290/AT2G26260/AT2G38700/AT3G19820/AT4G17190/AT5G13710/AT5G27450/AT5G47770
44DAS	either direction	GO Biological Process	1024	16746	tRNA aminoacylation for protein translation	GO:0006418	38	9	0.000375276	0.030384	0.0281381	AT1G11870/AT2G25840/AT2G31170/AT3G02660/AT3G62120/AT4G04350/AT4G17300/AT5G16715/AT5G49030
44DAS	either direction	GO Biological Process	1024	16746	regulation of DNA-templated transcription initiation	GO:2000142	7	4	0.000419053	0.030384	0.0281381	AT1G08540/AT1G64860/AT2G36990/AT5G13730
44DAS	either direction	GO Biological Process	1024	16746	chloroplast fission	GO:0010020	24	7	0.000431685	0.030384	0.0281381	AT2G21280/AT3G19180/AT3G29185/AT3G52750/AT4G23940/AT5G21920/AT5G46290
44DAS	either direction	GO Biological Process	1024	16746	gluconeogenesis	GO:0006094	25	7	0.000568182	0.0371348	0.03439	AT1G22170/AT1G56190/AT2G21170/AT2G21330/AT3G54050/AT3G55800/AT4G24620
44DAS	either direction	GO Biological Process	1024	16746	photosystem II repair	GO:0010206	13	5	0.000720537	0.0439528	0.040704	AT1G03600/AT1G75690/AT2G47940/AT4G02530/AT4G18370
44DAS	either direction	GO Biological Process	1024	16746	sterol biosynthetic process	GO:0016126	42	9	0.000823633	0.0443308	0.0410541	AT1G10030/AT1G47290/AT2G17370/AT2G26260/AT2G38700/AT4G17190/AT5G13710/AT5G27450/AT5G47770
44DAS	either direction	GO Biological Process	1024	16746	protoporphyrinogen IX biosynthetic process	GO:0006782	14	5	0.00106468	0.0541212	0.0501209	AT2G40490/AT3G14930/AT3G48730/AT4G01690/AT5G08280
44DAS	either direction	GO Biological Process	1024	16746	steroid biosynthetic process	GO:0006694	40	8	0.00253528	0.0828495	0.0767257	AT1G10030/AT1G47290/AT2G26260/AT2G38700/AT4G17190/AT5G13710/AT5G27450/AT5G47770
44DAS	either direction	GO Biological Process	1024	16746	response to salt stress	GO:0009651	350	28	0.0882691	0.540491	0.500541	AT1G16540/AT1G27760/AT1G54100/AT1G69310/AT2G35510/AT2G38340/AT2G47190/AT3G05360/AT3G49210/AT3G51960/AT3G57530/AT3G57540/AT3G62260/AT4G08500/AT4G21670/AT5G13180/AT5G24090/AT5G27600/AT5G46180/AT1G05850/AT1G15690/AT1G31690/AT1G53300/AT3G06370/AT3G52150/AT3G62030/AT5G25370/AT5G51110
44DAS	either direction	GO Biological Process	1024	16746	cellular glucan metabolic process	GO:0006073	29	4	0.0980569	0.553549	0.512634	AT1G11545/AT2G06850/AT3G23730/AT4G37800
44DAS	either direction	GO Biological Process	1024	16746	response to wounding	GO:0009611	199	16	0.159929	0.696505	0.645023	AT1G33980/AT1G62810/AT1G74020/AT2G30020/AT2G33150/AT2G39260/AT3G17800/AT4G08500/AT4G21670/AT4G32940/AT5G24090/AT5G47910/AT5G53750/AT1G31690/AT1G51400/AT4G34190
44DAS	either direction	GO Biological Process	1024	16746	cell wall biogenesis	GO:0042546	53	4	0.408282	0.761928	0.705611	AT1G11545/AT2G06850/AT3G23730/AT4G37800
44DAS	either direction	GO Biological Process	1024	16746	response to molecule of bacterial origin	GO:0002237	39	3	0.429572	0.761928	0.705611	AT1G62810/AT3G05360/AT3G10490
44DAS	either direction	GO Biological Process	1024	16746	defense response to other organism	GO:0098542	61	4	0.517155	0.796701	0.737813	AT1G51660/AT3G46530/AT5G06960/AT3G54920
44DAS	either direction	GO Biological Process	1024	16746	cellular response to hypoxia	GO:0071456	232	13	0.667751	0.854535	0.791373	AT2G36580/AT3G52800/AT4G26270/AT4G29780/AT5G04340/AT5G05410/AT5G42050/AT5G47910/AT5G54470/AT5G63130/AT5G64260/AT5G66650/AT3G43190
44DAS	either direction	GO Biological Process	1024	16746	positive regulation of leaf senescence	GO:1900057	18	1	0.679017	0.856966	0.793624	AT1G04250
44DAS	either direction	GO Biological Process	1024	16746	plant-type hypersensitive response	GO:0009626	76	4	0.690878	0.861562	0.797881	AT1G51660/AT2G20310/AT3G46530/AT5G46180
44DAS	either direction	GO Biological Process	1024	16746	protein autophosphorylation	GO:0046777	157	8	0.751124	0.882257	0.817046	AT1G65790/AT2G11520/AT2G17290/AT3G57530/AT4G03260/AT4G08500/AT5G59700/AT1G49580
44DAS	either direction	GO Biological Process	1024	16746	defense response to bacterium	GO:0042742	318	15	0.881851	0.953775	0.883277	AT1G16540/AT1G33980/AT1G77920/AT2G20310/AT2G39050/AT2G39260/AT3G09830/AT3G44670/AT3G54640/AT4G02410/AT4G31500/AT5G46180/AT5G52640/AT5G65600/AT5G42810
44DAS	either direction	GO Biological Process	1024	16746	response to bacterium	GO:0009617	129	5	0.901952	0.962995	0.891816	AT2G28400/AT3G09830/AT3G12580/AT4G11220/AT2G15280
44DAS	either direction	GO Biological Process	1024	16746	response to oxidative stress	GO:0006979	254	7	0.995758	0.999522	0.925643	AT1G11210/AT2G35510/AT2G24150/AT3G47860/AT3G62030/AT4G09010/AT5G64940
44DAS	either direction	GO Biological Process	1024	16746	signal transduction	GO:0007165	334	10	0.99708	0.999522	0.925643	AT1G72840/AT2G20900/AT3G44670/AT3G46920/AT3G46930/AT4G16960/AT5G07920/AT5G45260/AT3G02870/AT3G62030
44DAS	35S::SLIM1 UP & slim1-cr DOWN	GO Biological Process	380	16746	response to salt stress	GO:0009651	350	19	0.000427304	0.0743509	0.0679188	AT1G16540/AT1G27760/AT1G54100/AT1G69310/AT2G35510/AT2G38340/AT2G47190/AT3G05360/AT3G49210/AT3G51960/AT3G57530/AT3G57540/AT3G62260/AT4G08500/AT4G21670/AT5G13180/AT5G24090/AT5G27600/AT5G46180
44DAS	35S::SLIM1 UP & slim1-cr DOWN	GO Biological Process	380	16746	response to wounding	GO:0009611	199	13	0.000636901	0.0831155	0.0759253	AT1G33980/AT1G62810/AT1G74020/AT2G30020/AT2G33150/AT2G39260/AT3G17800/AT4G08500/AT4G21670/AT4G32940/AT5G24090/AT5G47910/AT5G53750
44DAS	35S::SLIM1 UP & slim1-cr DOWN	GO Biological Process	380	16746	cellular response to hypoxia	GO:0071456	232	12	0.00688199	0.17275	0.157806	AT2G36580/AT3G52800/AT4G26270/AT4G29780/AT5G04340/AT5G05410/AT5G42050/AT5G47910/AT5G54470/AT5G63130/AT5G64260/AT5G66650
44DAS	35S::SLIM1 UP & slim1-cr DOWN	GO Biological Process	380	16746	defense response to bacterium	GO:0042742	318	14	0.0141834	0.205659	0.187868	AT1G16540/AT1G33980/AT1G77920/AT2G20310/AT2G39050/AT2G39260/AT3G09830/AT3G44670/AT3G54640/AT4G02410/AT4G31500/AT5G46180/AT5G52640/AT5G65600
44DAS	35S::SLIM1 UP & slim1-cr DOWN	GO Biological Process	380	16746	response to molecule of bacterial origin	GO:0002237	39	3	0.0581131	0.383988	0.35077	AT1G62810/AT3G05360/AT3G10490
44DAS	35S::SLIM1 UP & slim1-cr DOWN	GO Biological Process	380	16746	protein autophosphorylation	GO:0046777	157	7	0.0670543	0.414622	0.378754	AT1G65790/AT2G11520/AT2G17290/AT3G57530/AT4G03260/AT4G08500/AT5G59700
44DAS	35S::SLIM1 UP & slim1-cr DOWN	GO Biological Process	380	16746	plant-type hypersensitive response	GO:0009626	76	4	0.0942097	0.414622	0.378754	AT1G51660/AT2G20310/AT3G46530/AT5G46180
44DAS	35S::SLIM1 UP & slim1-cr DOWN	GO Biological Process	380	16746	defense response to other organism	GO:0098542	61	3	0.160699	0.423114	0.38651	AT1G51660/AT3G46530/AT5G06960
44DAS	35S::SLIM1 UP & slim1-cr DOWN	GO Biological Process	380	16746	thylakoid membrane organization	GO:0010027	48	2	0.297418	0.494433	0.45166	AT1G24490/AT1G30475
44DAS	35S::SLIM1 UP & slim1-cr DOWN	GO Biological Process	380	16746	response to bacterium	GO:0009617	129	4	0.336195	0.507877	0.463941	AT2G28400/AT3G09830/AT3G12580/AT4G11220
44DAS	35S::SLIM1 UP & slim1-cr DOWN	GO Biological Process	380	16746	signal transduction	GO:0007165	334	8	0.488713	0.613241	0.560189	AT1G72840/AT2G20900/AT3G44670/AT3G46920/AT3G46930/AT4G16960/AT5G07920/AT5G45260
44DAS	35S::SLIM1 UP & slim1-cr DOWN	GO Biological Process	380	16746	chloroplast organization	GO:0009658	181	3	0.78212	0.843204	0.770259	AT1G24490/AT1G30475/AT5G59220
44DAS	35S::SLIM1 UP & slim1-cr DOWN	GO Biological Process	380	16746	photosynthesis	GO:0015979	133	1	0.953348	0.968186	0.884429	AT1G61800
44DAS	35S::SLIM1 UP & slim1-cr DOWN	GO Biological Process	380	16746	response to oxidative stress	GO:0006979	254	2	0.980369	0.98794	0.902474	AT1G11210/AT2G35510
44DAS	35S::SLIM1 UP & slim1-cr DOWN	GO Biological Process	380	16746	translation	GO:0006412	474	3	0.998774	0.998774	0.912371	AT1G17440/AT4G11160/AT5G47880
44DAS	35S::SLIM1 DOWN & slim1-cr UP	GO Biological Process	644	16746	photosynthesis	GO:0015979	133	37	5.45831e-22	3.72803e-19	3.34968e-19	AT1G03630/AT1G08520/AT1G15820/AT1G29910/AT1G30380/AT1G44575/AT1G52230/AT1G67090/AT1G74470/AT1G76450/AT1G77090/AT2G20890/AT2G26550/AT2G28605/AT3G08940/AT3G21055/AT3G27690/AT3G54050/AT3G56940/AT4G02770/AT4G09650/AT4G15510/AT4G17600/AT4G18480/AT4G21280/AT4G27440/AT4G28660/AT4G34190/AT5G11450/AT5G13630/AT5G16440/AT5G27390/AT5G38430/AT5G45040/AT5G45930/AT5G54270/AT5G64040
44DAS	35S::SLIM1 DOWN & slim1-cr UP	GO Biological Process	644	16746	chlorophyll biosynthetic process	GO:0015995	42	22	1.30045e-20	4.44105e-18	3.99034e-18	AT1G03630/AT1G08520/AT1G10670/AT1G44446/AT1G74470/AT2G40490/AT3G14110/AT3G14930/AT3G48730/AT3G51820/AT3G56940/AT4G01690/AT4G15560/AT4G18480/AT4G25080/AT4G27430/AT4G27440/AT5G08280/AT5G13630/AT5G16440/AT5G18660/AT5G45930
44DAS	35S::SLIM1 DOWN & slim1-cr UP	GO Biological Process	644	16746	translation	GO:0006412	474	57	1.69788e-14	3.86552e-12	3.47322e-12	AT1G05190/AT1G07320/AT1G11870/AT1G29070/AT1G32990/AT1G35680/AT1G48350/AT1G48520/AT1G64510/AT1G74970/AT1G75350/AT1G78630/AT1G79850/AT2G18400/AT2G24090/AT2G25840/AT2G31170/AT2G33450/AT2G33800/AT2G34520/AT2G43030/AT3G02080/AT3G02660/AT3G08740/AT3G13120/AT3G15190/AT3G25660/AT3G25920/AT3G27160/AT3G27830/AT3G44890/AT3G48110/AT3G54210/AT3G58140/AT3G62120/AT3G62910/AT3G63490/AT4G01310/AT4G04350/AT4G17300…
44DAS	35S::SLIM1 DOWN & slim1-cr UP	GO Biological Process	644	16746	reductive pentose-phosphate cycle	GO:0019253	20	9	1.99901e-08	3.41331e-06	3.06691e-06	AT1G12900/AT1G42970/AT1G56190/AT1G67090/AT2G21170/AT3G04790/AT3G54050/AT3G55800/AT5G38430
44DAS	35S::SLIM1 DOWN & slim1-cr UP	GO Biological Process	644	16746	chloroplast organization	GO:0009658	181	25	2.94774e-08	3.84669e-06	3.4563e-06	AT1G08540/AT1G11870/AT1G35680/AT1G44000/AT2G21170/AT2G25870/AT2G34620/AT2G36000/AT2G47940/AT3G19180/AT3G19570/AT3G26900/AT3G52750/AT3G56940/AT3G62910/AT4G01800/AT4G13670/AT4G20130/AT4G20360/AT4G23940/AT5G08050/AT5G13770/AT5G22640/AT5G24314/AT5G45390
44DAS	35S::SLIM1 DOWN & slim1-cr UP	GO Biological Process	644	16746	plastid translation	GO:0032544	21	9	3.37923e-08	3.84669e-06	3.4563e-06	AT1G79850/AT2G33800/AT2G38140/AT2G39140/AT3G56910/AT3G62910/AT4G31850/AT5G10900/AT5G54600
44DAS	35S::SLIM1 DOWN & slim1-cr UP	GO Biological Process	644	16746	thylakoid membrane organization	GO:0010027	48	12	1.84749e-07	1.80262e-05	1.61968e-05	AT1G35680/AT1G44575/AT1G56190/AT2G07050/AT2G20890/AT3G26900/AT3G62910/AT4G20130/AT5G08050/AT5G22830/AT5G24314/AT5G53860
44DAS	35S::SLIM1 DOWN & slim1-cr UP	GO Biological Process	644	16746	chloroplast rRNA processing	GO:1901259	22	8	9.07911e-07	7.75129e-05	6.96463e-05	AT1G06190/AT1G12800/AT2G25870/AT2G33800/AT2G37220/AT3G28460/AT3G52150/AT4G24770
44DAS	35S::SLIM1 DOWN & slim1-cr UP	GO Biological Process	644	16746	steroid metabolic process	GO:0008202	36	9	6.44832e-06	0.000489356	0.000439693	AT1G10030/AT1G47290/AT2G26260/AT2G38700/AT3G19820/AT4G17190/AT5G13710/AT5G27450/AT5G47770
44DAS	35S::SLIM1 DOWN & slim1-cr UP	GO Biological Process	644	16746	tRNA aminoacylation for protein translation	GO:0006418	38	9	1.04227e-05	0.000711867	0.000639622	AT1G11870/AT2G25840/AT2G31170/AT3G02660/AT3G62120/AT4G04350/AT4G17300/AT5G16715/AT5G49030
44DAS	35S::SLIM1 DOWN & slim1-cr UP	GO Biological Process	644	16746	chloroplast fission	GO:0010020	24	7	2.35169e-05	0.00141416	0.00127064	AT2G21280/AT3G19180/AT3G29185/AT3G52750/AT4G23940/AT5G21920/AT5G46290
44DAS	35S::SLIM1 DOWN & slim1-cr UP	GO Biological Process	644	16746	sterol biosynthetic process	GO:0016126	42	9	2.48462e-05	0.00141416	0.00127064	AT1G10030/AT1G47290/AT2G17370/AT2G26260/AT2G38700/AT4G17190/AT5G13710/AT5G27450/AT5G47770
44DAS	35S::SLIM1 DOWN & slim1-cr UP	GO Biological Process	644	16746	gluconeogenesis	GO:0006094	25	7	3.15844e-05	0.00165939	0.00149099	AT1G22170/AT1G56190/AT2G21170/AT2G21330/AT3G54050/AT3G55800/AT4G24620
44DAS	35S::SLIM1 DOWN & slim1-cr UP	GO Biological Process	644	16746	regulation of DNA-templated transcription initiation	GO:2000142	7	4	6.91281e-05	0.00337247	0.0030302	AT1G08540/AT1G64860/AT2G36990/AT5G13730
44DAS	35S::SLIM1 DOWN & slim1-cr UP	GO Biological Process	644	16746	photosystem II repair	GO:0010206	13	5	8.24145e-05	0.00375261	0.00337176	AT1G03600/AT1G75690/AT2G47940/AT4G02530/AT4G18370
44DAS	35S::SLIM1 DOWN & slim1-cr UP	GO Biological Process	644	16746	steroid biosynthetic process	GO:0006694	40	8	0.000118333	0.004988	0.00448178	AT1G10030/AT1G47290/AT2G26260/AT2G38700/AT4G17190/AT5G13710/AT5G27450/AT5G47770
44DAS	35S::SLIM1 DOWN & slim1-cr UP	GO Biological Process	644	16746	protoporphyrinogen IX biosynthetic process	GO:0006782	14	5	0.000124152	0.004988	0.00448178	AT2G40490/AT3G14930/AT3G48730/AT4G01690/AT5G08280
44DAS	35S::SLIM1 DOWN & slim1-cr UP	GO Biological Process	644	16746	cellular glucan metabolic process	GO:0006073	29	4	0.0239858	0.212757	0.191165	AT1G11545/AT2G06850/AT3G23730/AT4G37800
44DAS	35S::SLIM1 DOWN & slim1-cr UP	GO Biological Process	644	16746	cell wall biogenesis	GO:0042546	53	4	0.146021	0.59427	0.533959	AT1G11545/AT2G06850/AT3G23730/AT4G37800
44DAS	35S::SLIM1 DOWN & slim1-cr UP	GO Biological Process	644	16746	positive regulation of leaf senescence	GO:1900057	18	1	0.50651	0.758654	0.68166	AT1G04250
44DAS	35S::SLIM1 DOWN & slim1-cr UP	GO Biological Process	644	16746	defense response to other organism	GO:0098542	61	1	0.908969	0.971558	0.872957	AT3G54920
44DAS	35S::SLIM1 DOWN & slim1-cr UP	GO Biological Process	644	16746	response to salt stress	GO:0009651	350	9	0.925645	0.983228	0.883442	AT1G05850/AT1G15690/AT1G31690/AT1G53300/AT3G06370/AT3G52150/AT3G62030/AT5G25370/AT5G51110
44DAS	35S::SLIM1 DOWN & slim1-cr UP	GO Biological Process	644	16746	response to oxidative stress	GO:0006979	254	5	0.969342	0.999997	0.89851	AT2G24150/AT3G47860/AT3G62030/AT4G09010/AT5G64940
44DAS	35S::SLIM1 DOWN & slim1-cr UP	GO Biological Process	644	16746	response to wounding	GO:0009611	199	3	0.983922	0.999997	0.89851	AT1G31690/AT1G51400/AT4G34190
44DAS	35S::SLIM1 DOWN & slim1-cr UP	GO Biological Process	644	16746	response to bacterium	GO:0009617	129	1	0.993772	0.999997	0.89851	AT2G15280
44DAS	35S::SLIM1 DOWN & slim1-cr UP	GO Biological Process	644	16746	protein autophosphorylation	GO:0046777	157	1	0.997943	0.999997	0.89851	AT1G49580
44DAS	35S::SLIM1 DOWN & slim1-cr UP	GO Biological Process	644	16746	cellular response to hypoxia	GO:0071456	232	1	0.999895	0.999997	0.89851	AT3G43190
44DAS	35S::SLIM1 DOWN & slim1-cr UP	GO Biological Process	644	16746	signal transduction	GO:0007165	334	2	0.999974	0.999997	0.89851	AT3G02870/AT3G62030
44DAS	35S::SLIM1 DOWN & slim1-cr UP	GO Biological Process	644	16746	defense response to bacterium	GO:0042742	318	1	0.999997	0.999997	0.89851	AT5G42810
44DAS	either direction	GO Molecular Function	1095	17695	rRNA binding	GO:0019843	92	27	4.87948e-12	2.35679e-09	2.17779e-09	AT1G05190/AT1G06190/AT1G07320/AT1G12800/AT1G29070/AT1G32990/AT1G35680/AT1G48350/AT1G64510/AT1G74970/AT1G75350/AT1G79850/AT2G18400/AT2G33800/AT2G43030/AT3G15190/AT3G44890/AT3G52150/AT3G54210/AT3G63490/AT4G01310/AT4G17560/AT5G13510/AT5G14320/AT5G17870/AT5G47190/AT5G54600
44DAS	either direction	GO Molecular Function	1095	17695	isomerase activity	GO:0016853	231	36	2.74342e-07	6.62535e-05	6.12215e-05	AT1G53780/AT2G02390/AT3G06860/AT4G08960/AT4G10960/AT1G20810/AT1G22170/AT1G60550/AT1G73655/AT1G75690/AT1G80350/AT2G07050/AT2G21170/AT2G32000/AT2G39140/AT2G43560/AT3G01480/AT3G04790/AT3G12345/AT3G15520/AT3G48730/AT3G51230/AT3G53580/AT3G60370/AT3G62030/AT4G02850/AT4G13670/AT4G19830/AT4G24620/AT4G26555/AT5G13120/AT5G16440/AT5G27390/AT5G45680/AT5G57030/AT5G66530
44DAS	either direction	GO Molecular Function	1095	17695	structural constituent of ribosome	GO:0003735	360	44	1.21922e-05	0.00196295	0.00181386	AT1G05190/AT1G07320/AT1G29070/AT1G32990/AT1G35680/AT1G48350/AT1G64510/AT1G74970/AT1G75350/AT1G78630/AT1G79850/AT2G18400/AT2G24090/AT2G27720/AT2G33450/AT2G33800/AT2G34520/AT2G36620/AT2G40010/AT2G43030/AT3G02080/AT3G13120/AT3G14290/AT3G15190/AT3G25920/AT3G27160/AT3G27830/AT3G44890/AT3G54210/AT3G63490/AT4G00810/AT4G01310/AT4G17560/AT4G34620/AT5G02450/AT5G13510/AT5G14320/AT5G17870/AT5G30510/AT5G40950…
44DAS	either direction	GO Molecular Function	1095	17695	aminoacyl-tRNA ligase activity	GO:0004812	48	12	2.58718e-05	0.00312402	0.00288675	AT1G11870/AT2G25840/AT2G31170/AT3G02660/AT3G48110/AT3G58140/AT3G62120/AT4G04350/AT4G17300/AT5G16715/AT5G22800/AT5G49030
44DAS	either direction	GO Molecular Function	1095	17695	peptidyl-prolyl cis-trans isomerase activity	GO:0003755	59	13	5.10036e-05	0.00492695	0.00455274	AT1G53780/AT4G08960/AT1G20810/AT1G73655/AT2G43560/AT3G01480/AT3G15520/AT3G60370/AT3G62030/AT4G19830/AT4G26555/AT5G13120/AT5G45680
44DAS	either direction	GO Molecular Function	1095	17695	magnesium chelatase activity	GO:0016851	5	4	6.93452e-05	0.00558229	0.00515831	AT1G08520/AT4G18480/AT5G13630/AT5G45930
44DAS	either direction	GO Molecular Function	1095	17695	protein domain specific binding	GO:0019904	64	13	0.00012413	0.00769333	0.00710902	AT1G15820/AT1G44575/AT1G51400/AT1G55490/AT2G44650/AT2G47450/AT4G02770/AT4G27440/AT4G34620/AT5G03940/AT5G38430/AT5G54270/AT5G64040
44DAS	either direction	GO Molecular Function	1095	17695	antiporter activity	GO:0015297	139	21	0.000127426	0.00769333	0.00710902	AT1G33110/AT1G55730/AT1G61800/AT1G73700/AT1G79610/AT3G14070/AT3G26590/AT4G21903/AT4G23010/AT4G23030/AT4G28390/AT5G09470/AT5G17860/AT5G52450/AT1G15180/AT1G21070/AT1G33080/AT2G38330/AT3G06370/AT5G17400/AT5G46110
44DAS	either direction	GO Molecular Function	1095	17695	ligase activity	GO:0016874	204	27	0.000153506	0.0077961	0.00720398	AT3G16910/AT4G19010/AT5G04090/AT5G27600/AT5G37600/AT1G08520/AT1G11870/AT1G30520/AT1G48520/AT1G77590/AT2G25840/AT2G31170/AT3G02660/AT3G25660/AT3G48110/AT3G58140/AT3G62120/AT4G04350/AT4G17300/AT4G18480/AT4G32915/AT5G13630/AT5G16715/AT5G22800/AT5G35360/AT5G45930/AT5G49030
44DAS	either direction	GO Molecular Function	1095	17695	chlorophyll binding	GO:0016168	27	8	0.00016141	0.0077961	0.00720398	AT1G15820/AT1G29910/AT1G44575/AT3G08940/AT3G27690/AT4G17600/AT4G34190/AT5G54270
44DAS	either direction	GO Molecular Function	1095	17695	sigma factor activity	GO:0016987	6	4	0.000197794	0.0079612	0.00735654	AT1G08540/AT1G64860/AT2G36990/AT5G13730
44DAS	either direction	GO Molecular Function	1095	17695	transmembrane transporter activity	GO:0022857	313	29	0.0196345	0.316116	0.292106	AT1G12940/AT1G25500/AT1G30220/AT1G31820/AT1G33110/AT1G61800/AT1G63010/AT1G69870/AT1G73700/AT1G74810/AT2G32830/AT3G26590/AT3G45650/AT4G21120/AT4G21903/AT4G23010/AT4G23030/AT5G09470/AT5G40240/AT5G45380/AT5G52450/AT1G15180/AT1G16390/AT1G21070/AT1G33080/AT2G37450/AT5G19760/AT5G26820/AT5G46110
44DAS	either direction	GO Molecular Function	1095	17695	xyloglucan:xyloglucosyl transferase activity	GO:0016762	26	4	0.0736413	0.488821	0.451694	AT1G11545/AT2G06850/AT3G23730/AT4G37800
44DAS	either direction	GO Molecular Function	1095	17695	polysaccharide binding	GO:0030247	67	7	0.119345	0.56405	0.52121	AT5G38240/AT1G05850/AT1G11545/AT2G06850/AT3G23730/AT4G37800/AT5G61130
44DAS	either direction	GO Molecular Function	1095	17695	ADP binding	GO:0043531	152	9	0.60291	0.774482	0.71566	AT1G12290/AT1G72840/AT3G44670/AT3G46530/AT3G46730/AT4G16960/AT5G45260/AT1G56190/AT5G45490
44DAS	either direction	GO Molecular Function	1095	17695	ubiquitin-protein transferase activity	GO:0004842	255	11	0.922957	0.958684	0.885871	AT2G44578/AT3G08690/AT3G60966/AT4G23450/AT5G53300/AT5G63760/AT1G59560/AT1G66050/AT1G71020/AT3G06140/AT4G21070
44DAS	either direction	GO Molecular Function	1095	17695	ubiquitin protein ligase activity	GO:0061630	202	5	0.995763	0.999309	0.923411	AT1G63840/AT1G78420/AT5G63760/AT1G66050/AT3G06140
44DAS	35S::SLIM1 UP & slim1-cr DOWN	GO Molecular Function	416	17695	antiporter activity	GO:0015297	139	14	5.14078e-06	0.00154738	0.00135284	AT1G33110/AT1G55730/AT1G61800/AT1G73700/AT1G79610/AT3G14070/AT3G26590/AT4G21903/AT4G23010/AT4G23030/AT4G28390/AT5G09470/AT5G17860/AT5G52450
44DAS	35S::SLIM1 UP & slim1-cr DOWN	GO Molecular Function	416	17695	transmembrane transporter activity	GO:0022857	313	21	1.75539e-05	0.00264186	0.00230972	AT1G12940/AT1G25500/AT1G30220/AT1G31820/AT1G33110/AT1G61800/AT1G63010/AT1G69870/AT1G73700/AT1G74810/AT2G32830/AT3G26590/AT3G45650/AT4G21120/AT4G21903/AT4G23010/AT4G23030/AT5G09470/AT5G40240/AT5G45380/AT5G52450
44DAS	35S::SLIM1 UP & slim1-cr DOWN	GO Molecular Function	416	17695	ADP binding	GO:0043531	152	7	0.0679126	0.340695	0.297862	AT1G12290/AT1G72840/AT3G44670/AT3G46530/AT3G46730/AT4G16960/AT5G45260
44DAS	35S::SLIM1 UP & slim1-cr DOWN	GO Molecular Function	416	17695	peptidyl-prolyl cis-trans isomerase activity	GO:0003755	59	2	0.405496	0.522171	0.456523	AT1G53780/AT4G08960
44DAS	35S::SLIM1 UP & slim1-cr DOWN	GO Molecular Function	416	17695	ligase activity	GO:0016874	204	5	0.525552	0.632192	0.552712	AT3G16910/AT4G19010/AT5G04090/AT5G27600/AT5G37600
44DAS	35S::SLIM1 UP & slim1-cr DOWN	GO Molecular Function	416	17695	ubiquitin-protein transferase activity	GO:0004842	255	6	0.556556	0.659541	0.576623	AT2G44578/AT3G08690/AT3G60966/AT4G23450/AT5G53300/AT5G63760
44DAS	35S::SLIM1 UP & slim1-cr DOWN	GO Molecular Function	416	17695	isomerase activity	GO:0016853	231	5	0.635769	0.724873	0.633741	AT1G53780/AT2G02390/AT3G06860/AT4G08960/AT4G10960
44DAS	35S::SLIM1 UP & slim1-cr DOWN	GO Molecular Function	416	17695	polysaccharide binding	GO:0030247	67	1	0.797489	0.860373	0.752206	AT5G38240
44DAS	35S::SLIM1 UP & slim1-cr DOWN	GO Molecular Function	416	17695	ubiquitin protein ligase activity	GO:0061630	202	3	0.857245	0.89284	0.780591	AT1G63840/AT1G78420/AT5G63760
44DAS	35S::SLIM1 DOWN & slim1-cr UP	GO Molecular Function	679	17695	rRNA binding	GO:0019843	92	27	4.65703e-17	1.63927e-14	1.48044e-14	AT1G05190/AT1G06190/AT1G07320/AT1G12800/AT1G29070/AT1G32990/AT1G35680/AT1G48350/AT1G64510/AT1G74970/AT1G75350/AT1G79850/AT2G18400/AT2G33800/AT2G43030/AT3G15190/AT3G44890/AT3G52150/AT3G54210/AT3G63490/AT4G01310/AT4G17560/AT5G13510/AT5G14320/AT5G17870/AT5G47190/AT5G54600
44DAS	35S::SLIM1 DOWN & slim1-cr UP	GO Molecular Function	679	17695	structural constituent of ribosome	GO:0003735	360	44	1.0549e-11	1.85662e-09	1.67673e-09	AT1G05190/AT1G07320/AT1G29070/AT1G32990/AT1G35680/AT1G48350/AT1G64510/AT1G74970/AT1G75350/AT1G78630/AT1G79850/AT2G18400/AT2G24090/AT2G27720/AT2G33450/AT2G33800/AT2G34520/AT2G36620/AT2G40010/AT2G43030/AT3G02080/AT3G13120/AT3G14290/AT3G15190/AT3G25920/AT3G27160/AT3G27830/AT3G44890/AT3G54210/AT3G63490/AT4G00810/AT4G01310/AT4G17560/AT4G34620/AT5G02450/AT5G13510/AT5G14320/AT5G17870/AT5G30510/AT5G40950…
44DAS	35S::SLIM1 DOWN & slim1-cr UP	GO Molecular Function	679	17695	isomerase activity	GO:0016853	231	31	1.28399e-09	1.50655e-07	1.36058e-07	AT1G20810/AT1G22170/AT1G60550/AT1G73655/AT1G75690/AT1G80350/AT2G07050/AT2G21170/AT2G32000/AT2G39140/AT2G43560/AT3G01480/AT3G04790/AT3G12345/AT3G15520/AT3G48730/AT3G51230/AT3G53580/AT3G60370/AT3G62030/AT4G02850/AT4G13670/AT4G19830/AT4G24620/AT4G26555/AT5G13120/AT5G16440/AT5G27390/AT5G45680/AT5G57030/AT5G66530
44DAS	35S::SLIM1 DOWN & slim1-cr UP	GO Molecular Function	679	17695	aminoacyl-tRNA ligase activity	GO:0004812	48	12	1.81167e-07	1.59427e-05	1.4398e-05	AT1G11870/AT2G25840/AT2G31170/AT3G02660/AT3G48110/AT3G58140/AT3G62120/AT4G04350/AT4G17300/AT5G16715/AT5G22800/AT5G49030
44DAS	35S::SLIM1 DOWN & slim1-cr UP	GO Molecular Function	679	17695	protein domain specific binding	GO:0019904	64	13	7.53158e-07	5.30224e-05	4.7885e-05	AT1G15820/AT1G44575/AT1G51400/AT1G55490/AT2G44650/AT2G47450/AT4G02770/AT4G27440/AT4G34620/AT5G03940/AT5G38430/AT5G54270/AT5G64040
44DAS	35S::SLIM1 DOWN & slim1-cr UP	GO Molecular Function	679	17695	chlorophyll binding	GO:0016168	27	8	5.23852e-06	0.000307327	0.00027755	AT1G15820/AT1G29910/AT1G44575/AT3G08940/AT3G27690/AT4G17600/AT4G34190/AT5G54270
44DAS	35S::SLIM1 DOWN & slim1-cr UP	GO Molecular Function	679	17695	magnesium chelatase activity	GO:0016851	5	4	1.04205e-05	0.000499675	0.000451261	AT1G08520/AT4G18480/AT5G13630/AT5G45930
44DAS	35S::SLIM1 DOWN & slim1-cr UP	GO Molecular Function	679	17695	ligase activity	GO:0016874	204	22	1.26548e-05	0.000499675	0.000451261	AT1G08520/AT1G11870/AT1G30520/AT1G48520/AT1G77590/AT2G25840/AT2G31170/AT3G02660/AT3G25660/AT3G48110/AT3G58140/AT3G62120/AT4G04350/AT4G17300/AT4G18480/AT4G32915/AT5G13630/AT5G16715/AT5G22800/AT5G35360/AT5G45930/AT5G49030
44DAS	35S::SLIM1 DOWN & slim1-cr UP	GO Molecular Function	679	17695	peptidyl-prolyl cis-trans isomerase activity	GO:0003755	59	11	1.27758e-05	0.000499675	0.000451261	AT1G20810/AT1G73655/AT2G43560/AT3G01480/AT3G15520/AT3G60370/AT3G62030/AT4G19830/AT4G26555/AT5G13120/AT5G45680
44DAS	35S::SLIM1 DOWN & slim1-cr UP	GO Molecular Function	679	17695	sigma factor activity	GO:0016987	6	4	3.03084e-05	0.00106685	0.000963487	AT1G08540/AT1G64860/AT2G36990/AT5G13730
44DAS	35S::SLIM1 DOWN & slim1-cr UP	GO Molecular Function	679	17695	xyloglucan:xyloglucosyl transferase activity	GO:0016762	26	4	0.0164069	0.232763	0.210211	AT1G11545/AT2G06850/AT3G23730/AT4G37800
44DAS	35S::SLIM1 DOWN & slim1-cr UP	GO Molecular Function	679	17695	polysaccharide binding	GO:0030247	67	6	0.043225	0.311545	0.281359	AT1G05850/AT1G11545/AT2G06850/AT3G23730/AT4G37800/AT5G61130
44DAS	35S::SLIM1 DOWN & slim1-cr UP	GO Molecular Function	679	17695	antiporter activity	GO:0015297	139	7	0.285576	0.649088	0.586198	AT1G15180/AT1G21070/AT1G33080/AT2G38330/AT3G06370/AT5G17400/AT5G46110
44DAS	35S::SLIM1 DOWN & slim1-cr UP	GO Molecular Function	679	17695	transmembrane transporter activity	GO:0022857	313	8	0.917056	0.995663	0.899193	AT1G15180/AT1G16390/AT1G21070/AT1G33080/AT2G37450/AT5G19760/AT5G26820/AT5G46110
44DAS	35S::SLIM1 DOWN & slim1-cr UP	GO Molecular Function	679	17695	ubiquitin-protein transferase activity	GO:0004842	255	5	0.969634	0.999873	0.902995	AT1G59560/AT1G66050/AT1G71020/AT3G06140/AT4G21070
44DAS	35S::SLIM1 DOWN & slim1-cr UP	GO Molecular Function	679	17695	ADP binding	GO:0043531	152	2	0.981878	0.999873	0.902995	AT1G56190/AT5G45490
44DAS	35S::SLIM1 DOWN & slim1-cr UP	GO Molecular Function	679	17695	ubiquitin protein ligase activity	GO:0061630	202	2	0.996771	0.999873	0.902995	AT1G66050/AT3G06140
44DAS	either direction	GO Cellular Component	1094	16858	thylakoid	GO:0009579	355	107	1.69418e-43	3.49001e-41	3.10302e-41	AT1G24490/AT3G17700/AT3G57680/AT4G11910/AT4G11960/AT4G22240/AT4G22260/AT5G13800/AT1G03600/AT1G07320/AT1G07820/AT1G15820/AT1G20810/AT1G29910/AT1G30380/AT1G44000/AT1G44446/AT1G44575/AT1G49380/AT1G52230/AT1G55370/AT1G56190/AT1G59840/AT1G64150/AT1G64510/AT1G67090/AT1G67700/AT1G73655/AT1G75690/AT1G76450/AT1G77090/AT1G78630/AT2G05990/AT2G21170/AT2G21330/AT2G28605/AT2G33800/AT2G37220/AT2G37660/AT2G43560…
44DAS	either direction	GO Cellular Component	1094	16858	chloroplast thylakoid membrane	GO:0009535	373	101	1.49235e-36	1.53712e-34	1.36668e-34	AT1G24490/AT3G14440/AT3G17700/AT4G11910/AT4G11960/AT4G22240/AT4G22260/AT5G13800/AT1G03600/AT1G03630/AT1G07320/AT1G14345/AT1G15820/AT1G29910/AT1G30380/AT1G42970/AT1G44446/AT1G44575/AT1G49380/AT1G51400/AT1G52230/AT1G55370/AT1G59840/AT1G64150/AT1G64510/AT1G67090/AT1G67700/AT1G72640/AT1G74470/AT1G75690/AT1G76450/AT1G78915/AT1G80030/AT2G10940/AT2G17972/AT2G20890/AT2G21530/AT2G24020/AT2G33800/AT2G37220…
44DAS	either direction	GO Cellular Component	1094	16858	chloroplast thylakoid	GO:0009534	213	69	1.92039e-30	1.31867e-28	1.17245e-28	AT4G22240/AT1G03600/AT1G03630/AT1G08520/AT1G11860/AT1G14345/AT1G15820/AT1G29910/AT1G30380/AT1G44000/AT1G44575/AT1G52230/AT1G64150/AT1G67700/AT1G74470/AT1G75690/AT1G77090/AT1G79850/AT2G20890/AT2G21330/AT2G22230/AT2G33800/AT2G37220/AT2G38540/AT2G42220/AT2G43560/AT3G01480/AT3G08920/AT3G08940/AT3G14110/AT3G15520/AT3G16000/AT3G18890/AT3G26060/AT3G27160/AT3G45980/AT3G51820/AT3G52750/AT3G56940/AT3G57560…
44DAS	either direction	GO Cellular Component	1094	16858	chloroplast thylakoid lumen	GO:0009543	51	24	1.03044e-15	5.30675e-14	4.71832e-14	AT3G57680/AT1G03600/AT1G20810/AT1G73655/AT1G76450/AT1G77090/AT2G28605/AT2G43560/AT3G01480/AT3G15520/AT3G26060/AT3G47860/AT3G60370/AT4G02530/AT4G09010/AT4G15510/AT4G18370/AT4G19830/AT4G24930/AT4G26555/AT5G11450/AT5G45040/AT5G45680/AT5G53490
44DAS	either direction	GO Cellular Component	1094	16858	thylakoid lumen	GO:0031977	51	23	1.30611e-14	5.38115e-13	4.78447e-13	AT4G22240/AT1G20810/AT1G67090/AT1G76450/AT1G77090/AT2G21330/AT2G43560/AT3G01480/AT3G15520/AT3G47860/AT3G60370/AT3G62030/AT4G02530/AT4G09010/AT4G15510/AT4G18370/AT4G21280/AT4G24930/AT4G26555/AT5G11450/AT5G13120/AT5G45680/AT5G53490
44DAS	either direction	GO Cellular Component	1094	16858	photosystem II	GO:0009523	62	18	4.36638e-08	1.49912e-06	1.33289e-06	AT1G03600/AT1G15820/AT1G29910/AT1G44575/AT1G76450/AT1G77090/AT2G28605/AT3G08940/AT3G21055/AT3G27690/AT4G15510/AT4G17600/AT4G21280/AT4G28660/AT4G34190/AT5G11450/AT5G27390/AT5G54270
44DAS	either direction	GO Cellular Component	1094	16858	chloroplast membrane	GO:0031969	160	28	1.3577e-06	3.99552e-05	3.55248e-05	AT1G04570/AT1G61800/AT1G80300/AT2G18950/AT4G03320/AT1G03630/AT1G04940/AT1G25290/AT1G30520/AT1G42970/AT1G44446/AT1G60600/AT1G64150/AT1G67090/AT1G68890/AT1G74470/AT2G38330/AT3G14110/AT3G51820/AT4G25080/AT4G27030/AT5G05740/AT5G13630/AT5G17230/AT5G22830/AT5G46110/AT5G57030/AT5G64940
44DAS	either direction	GO Cellular Component	1094	16858	ribosome	GO:0005840	389	48	1.33436e-05	0.000343597	0.000305497	AT1G05190/AT1G07320/AT1G29070/AT1G32990/AT1G35680/AT1G48350/AT1G64510/AT1G74970/AT1G75350/AT1G78630/AT1G79850/AT2G18400/AT2G24090/AT2G27720/AT2G33450/AT2G33800/AT2G34520/AT2G36620/AT2G38140/AT2G40010/AT2G43030/AT3G02080/AT3G13120/AT3G15190/AT3G25920/AT3G27160/AT3G27830/AT3G44890/AT3G52150/AT3G54210/AT3G56910/AT3G63490/AT4G00810/AT4G01310/AT4G17560/AT4G34620/AT5G02450/AT5G13510/AT5G14320/AT5G17870…
44DAS	either direction	GO Cellular Component	1094	16858	photosystem II oxygen evolving complex	GO:0009654	22	8	4.31692e-05	0.000988096	0.000878532	AT1G76450/AT1G77090/AT2G28605/AT4G15510/AT4G21280/AT4G28660/AT5G11450/AT5G27390
44DAS	either direction	GO Cellular Component	1094	16858	plastid large ribosomal subunit	GO:0000311	5	4	8.36591e-05	0.00172338	0.00153228	AT1G07320/AT3G25920/AT3G27830/AT3G44890
44DAS	either direction	GO Cellular Component	1094	16858	photosystem I	GO:0009522	35	9	0.000299613	0.00561093	0.00498877	AT1G15820/AT1G29910/AT1G30380/AT1G52230/AT3G08940/AT3G27690/AT4G02770/AT5G54270/AT5G64040
44DAS	either direction	GO Cellular Component	1094	16858	plastid inner membrane	GO:0009528	60	12	0.000402955	0.0069174	0.00615037	AT4G03320/AT1G04940/AT2G20890/AT2G21280/AT3G18890/AT3G19180/AT3G26570/AT3G56940/AT3G63410/AT4G23940/AT5G01590/AT5G22640
44DAS	either direction	GO Cellular Component	1094	16858	apoplast	GO:0048046	394	43	0.000573475	0.00908737	0.00807973	AT1G62810/AT3G09440/AT5G11670/AT5G64260/AT1G05850/AT1G09750/AT1G11545/AT1G11860/AT1G12900/AT1G29910/AT1G41830/AT1G42970/AT1G55490/AT1G67090/AT1G67830/AT1G70370/AT2G06850/AT2G10940/AT2G21170/AT2G21330/AT2G28470/AT2G37660/AT2G38540/AT2G43750/AT2G45470/AT3G10080/AT3G11630/AT3G16370/AT3G23730/AT3G52840/AT3G54050/AT3G55800/AT3G62030/AT4G12970/AT4G20360/AT4G37800/AT5G06290/AT5G08280/AT5G10540/AT5G13980…
44DAS	either direction	GO Cellular Component	1094	16858	chloroplast inner membrane	GO:0009706	90	15	0.000640076	0.00941826	0.00837392	AT4G03320/AT1G04940/AT1G25290/AT1G44446/AT2G21280/AT3G18890/AT3G19180/AT3G26570/AT3G56940/AT3G61870/AT3G63410/AT4G23940/AT5G01590/AT5G13630/AT5G22640
44DAS	either direction	GO Cellular Component	1094	16858	stromule	GO:0010319	36	8	0.00181332	0.0249029	0.0221416	AT1G42970/AT1G55490/AT2G20890/AT2G37220/AT3G11630/AT3G54050/AT4G09650/AT5G06290
44DAS	either direction	GO Cellular Component	1094	16858	plastid-encoded plastid RNA polymerase complex	GO:0000427	10	4	0.00269902	0.0347499	0.0308967	AT3G12930/AT4G13670/AT4G20130/AT5G24314
44DAS	either direction	GO Cellular Component	1094	16858	chloroplast nucleoid	GO:0042644	46	8	0.00881267	0.0864481	0.0768624	AT3G09210/AT3G12930/AT3G27830/AT4G13670/AT4G20130/AT4G20360/AT5G24314/AT5G65220
44DAS	either direction	GO Cellular Component	1094	16858	cell wall	GO:0005618	27	4	0.094343	0.441697	0.39272	AT1G11545/AT2G06850/AT3G23730/AT4G37800
44DAS	35S::SLIM1 UP & slim1-cr DOWN	GO Cellular Component	391	16858	chloroplast membrane	GO:0031969	160	5	0.313943	0.612271	0.605603	AT1G04570/AT1G61800/AT1G80300/AT2G18950/AT4G03320
44DAS	35S::SLIM1 UP & slim1-cr DOWN	GO Cellular Component	391	16858	thylakoid	GO:0009579	355	8	0.582892	0.777953	0.769482	AT1G24490/AT3G17700/AT3G57680/AT4G11910/AT4G11960/AT4G22240/AT4G22260/AT5G13800
44DAS	35S::SLIM1 UP & slim1-cr DOWN	GO Cellular Component	391	16858	chloroplast thylakoid membrane	GO:0009535	373	8	0.638476	0.805036	0.796269	AT1G24490/AT3G14440/AT3G17700/AT4G11910/AT4G11960/AT4G22240/AT4G22260/AT5G13800
44DAS	35S::SLIM1 UP & slim1-cr DOWN	GO Cellular Component	391	16858	chloroplast thylakoid lumen	GO:0009543	51	1	0.698388	0.843885	0.834696	AT3G57680
44DAS	35S::SLIM1 UP & slim1-cr DOWN	GO Cellular Component	391	16858	thylakoid lumen	GO:0031977	51	1	0.698388	0.843885	0.834696	AT4G22240
44DAS	35S::SLIM1 UP & slim1-cr DOWN	GO Cellular Component	391	16858	plastid inner membrane	GO:0009528	60	1	0.755983	0.870225	0.860748	AT4G03320
44DAS	35S::SLIM1 UP & slim1-cr DOWN	GO Cellular Component	391	16858	chloroplast inner membrane	GO:0009706	90	1	0.87969	0.96268	0.952197	AT4G03320
44DAS	35S::SLIM1 UP & slim1-cr DOWN	GO Cellular Component	391	16858	apoplast	GO:0048046	394	4	0.98266	0.999052	0.988173	AT1G62810/AT3G09440/AT5G11670/AT5G64260
44DAS	35S::SLIM1 UP & slim1-cr DOWN	GO Cellular Component	391	16858	chloroplast thylakoid	GO:0009534	213	1	0.993465	0.999052	0.988173	AT4G22240
44DAS	35S::SLIM1 DOWN & slim1-cr UP	GO Cellular Component	703	16858	thylakoid	GO:0009579	355	99	1.70371e-54	2.45334e-52	1.84718e-52	AT1G03600/AT1G07320/AT1G07820/AT1G15820/AT1G20810/AT1G29910/AT1G30380/AT1G44000/AT1G44446/AT1G44575/AT1G49380/AT1G52230/AT1G55370/AT1G56190/AT1G59840/AT1G64150/AT1G64510/AT1G67090/AT1G67700/AT1G73655/AT1G75690/AT1G76450/AT1G77090/AT1G78630/AT2G05990/AT2G21170/AT2G21330/AT2G28605/AT2G33800/AT2G37220/AT2G37660/AT2G43560/AT2G45770/AT2G47940/AT3G01480/AT3G04790/AT3G08940/AT3G11630/AT3G14110/AT3G15520…
44DAS	35S::SLIM1 DOWN & slim1-cr UP	GO Cellular Component	703	16858	chloroplast thylakoid membrane	GO:0009535	373	93	1.50313e-46	1.08226e-44	8.14857e-45	AT1G03600/AT1G03630/AT1G07320/AT1G14345/AT1G15820/AT1G29910/AT1G30380/AT1G42970/AT1G44446/AT1G44575/AT1G49380/AT1G51400/AT1G52230/AT1G55370/AT1G59840/AT1G64150/AT1G64510/AT1G67090/AT1G67700/AT1G72640/AT1G74470/AT1G75690/AT1G76450/AT1G78915/AT1G80030/AT2G10940/AT2G17972/AT2G20890/AT2G21530/AT2G24020/AT2G33800/AT2G37220/AT2G42220/AT2G45770/AT2G47450/AT2G47940/AT3G01480/AT3G04790/AT3G08940/AT3G12345…
44DAS	35S::SLIM1 DOWN & slim1-cr UP	GO Cellular Component	703	16858	chloroplast thylakoid	GO:0009534	213	68	1.19378e-41	5.73014e-40	4.31436e-40	AT1G03600/AT1G03630/AT1G08520/AT1G11860/AT1G14345/AT1G15820/AT1G29910/AT1G30380/AT1G44000/AT1G44575/AT1G52230/AT1G64150/AT1G67700/AT1G74470/AT1G75690/AT1G77090/AT1G79850/AT2G20890/AT2G21330/AT2G22230/AT2G33800/AT2G37220/AT2G38540/AT2G42220/AT2G43560/AT3G01480/AT3G08920/AT3G08940/AT3G14110/AT3G15520/AT3G16000/AT3G18890/AT3G26060/AT3G27160/AT3G45980/AT3G51820/AT3G52750/AT3G56940/AT3G57560/AT3G59780…
44DAS	35S::SLIM1 DOWN & slim1-cr UP	GO Cellular Component	703	16858	chloroplast thylakoid lumen	GO:0009543	51	23	8.43351e-19	3.03606e-17	2.28593e-17	AT1G03600/AT1G20810/AT1G73655/AT1G76450/AT1G77090/AT2G28605/AT2G43560/AT3G01480/AT3G15520/AT3G26060/AT3G47860/AT3G60370/AT4G02530/AT4G09010/AT4G15510/AT4G18370/AT4G19830/AT4G24930/AT4G26555/AT5G11450/AT5G45040/AT5G45680/AT5G53490
44DAS	35S::SLIM1 DOWN & slim1-cr UP	GO Cellular Component	703	16858	thylakoid lumen	GO:0031977	51	22	1.59068e-17	4.58117e-16	3.44927e-16	AT1G20810/AT1G67090/AT1G76450/AT1G77090/AT2G21330/AT2G43560/AT3G01480/AT3G15520/AT3G47860/AT3G60370/AT3G62030/AT4G02530/AT4G09010/AT4G15510/AT4G18370/AT4G21280/AT4G24930/AT4G26555/AT5G11450/AT5G13120/AT5G45680/AT5G53490
44DAS	35S::SLIM1 DOWN & slim1-cr UP	GO Cellular Component	703	16858	ribosome	GO:0005840	389	48	1.55364e-11	3.72873e-10	2.80745e-10	AT1G05190/AT1G07320/AT1G29070/AT1G32990/AT1G35680/AT1G48350/AT1G64510/AT1G74970/AT1G75350/AT1G78630/AT1G79850/AT2G18400/AT2G24090/AT2G27720/AT2G33450/AT2G33800/AT2G34520/AT2G36620/AT2G38140/AT2G40010/AT2G43030/AT3G02080/AT3G13120/AT3G15190/AT3G25920/AT3G27160/AT3G27830/AT3G44890/AT3G52150/AT3G54210/AT3G56910/AT3G63490/AT4G00810/AT4G01310/AT4G17560/AT4G34620/AT5G02450/AT5G13510/AT5G14320/AT5G17870…
44DAS	35S::SLIM1 DOWN & slim1-cr UP	GO Cellular Component	703	16858	photosystem II	GO:0009523	62	18	3.87557e-11	7.9726e-10	6.00276e-10	AT1G03600/AT1G15820/AT1G29910/AT1G44575/AT1G76450/AT1G77090/AT2G28605/AT3G08940/AT3G21055/AT3G27690/AT4G15510/AT4G17600/AT4G21280/AT4G28660/AT4G34190/AT5G11450/AT5G27390/AT5G54270
44DAS	35S::SLIM1 DOWN & slim1-cr UP	GO Cellular Component	703	16858	chloroplast membrane	GO:0031969	160	23	2.12818e-07	3.83073e-06	2.88425e-06	AT1G03630/AT1G04940/AT1G25290/AT1G30520/AT1G42970/AT1G44446/AT1G60600/AT1G64150/AT1G67090/AT1G68890/AT1G74470/AT2G38330/AT3G14110/AT3G51820/AT4G25080/AT4G27030/AT5G05740/AT5G13630/AT5G17230/AT5G22830/AT5G46110/AT5G57030/AT5G64940
44DAS	35S::SLIM1 DOWN & slim1-cr UP	GO Cellular Component	703	16858	apoplast	GO:0048046	394	39	5.36342e-07	8.58148e-06	6.4612e-06	AT1G05850/AT1G09750/AT1G11545/AT1G11860/AT1G12900/AT1G29910/AT1G41830/AT1G42970/AT1G55490/AT1G67090/AT1G67830/AT1G70370/AT2G06850/AT2G10940/AT2G21170/AT2G21330/AT2G28470/AT2G37660/AT2G38540/AT2G43750/AT2G45470/AT3G10080/AT3G11630/AT3G16370/AT3G23730/AT3G52840/AT3G54050/AT3G55800/AT3G62030/AT4G12970/AT4G20360/AT4G37800/AT5G06290/AT5G08280/AT5G10540/AT5G13980/AT5G26000/AT5G38430/AT5G66530
44DAS	35S::SLIM1 DOWN & slim1-cr UP	GO Cellular Component	703	16858	photosystem II oxygen evolving complex	GO:0009654	22	8	1.67086e-06	2.40604e-05	1.81157e-05	AT1G76450/AT1G77090/AT2G28605/AT4G15510/AT4G21280/AT4G28660/AT5G11450/AT5G27390
44DAS	35S::SLIM1 DOWN & slim1-cr UP	GO Cellular Component	703	16858	photosystem I	GO:0009522	35	9	9.64217e-06	0.000126225	9.50376e-05	AT1G15820/AT1G29910/AT1G30380/AT1G52230/AT3G08940/AT3G27690/AT4G02770/AT5G54270/AT5G64040
44DAS	35S::SLIM1 DOWN & slim1-cr UP	GO Cellular Component	703	16858	plastid large ribosomal subunit	GO:0000311	5	4	1.44996e-05	0.000173995	0.000131005	AT1G07320/AT3G25920/AT3G27830/AT3G44890
44DAS	35S::SLIM1 DOWN & slim1-cr UP	GO Cellular Component	703	16858	chloroplast inner membrane	GO:0009706	90	14	2.02416e-05	0.000224214	0.000168816	AT1G04940/AT1G25290/AT1G44446/AT2G21280/AT3G18890/AT3G19180/AT3G26570/AT3G56940/AT3G61870/AT3G63410/AT4G23940/AT5G01590/AT5G13630/AT5G22640
44DAS	35S::SLIM1 DOWN & slim1-cr UP	GO Cellular Component	703	16858	plastid inner membrane	GO:0009528	60	11	3.25055e-05	0.000334343	0.000251735	AT1G04940/AT2G20890/AT2G21280/AT3G18890/AT3G19180/AT3G26570/AT3G56940/AT3G63410/AT4G23940/AT5G01590/AT5G22640
44DAS	35S::SLIM1 DOWN & slim1-cr UP	GO Cellular Component	703	16858	stromule	GO:0010319	36	8	9.41945e-05	0.000904267	0.000680844	AT1G42970/AT1G55490/AT2G20890/AT2G37220/AT3G11630/AT3G54050/AT4G09650/AT5G06290
44DAS	35S::SLIM1 DOWN & slim1-cr UP	GO Cellular Component	703	16858	plastid-encoded plastid RNA polymerase complex	GO:0000427	10	4	0.000514809	0.00463328	0.00348851	AT3G12930/AT4G13670/AT4G20130/AT5G24314
44DAS	35S::SLIM1 DOWN & slim1-cr UP	GO Cellular Component	703	16858	chloroplast nucleoid	GO:0042644	46	8	0.000562348	0.00476342	0.00358649	AT3G09210/AT3G12930/AT3G27830/AT4G13670/AT4G20130/AT4G20360/AT5G24314/AT5G65220
44DAS	35S::SLIM1 DOWN & slim1-cr UP	GO Cellular Component	703	16858	cell wall	GO:0005618	27	4	0.024534	0.110403	0.0831252	AT1G11545/AT2G06850/AT3G23730/AT4G37800
