# Supplementary material for: Overexpression of SLIM1 transcription factor accelerates vegetative development in Arabidopsis thaliana
Source: Front Plant Sci. 2024 Mar 20;15:1327152. doi: 10.3389/fpls.2024.1327152 (PMC10988502; doi:10.3389/fpls.2024.1327152)
Supplement: Supplementary file 9 [file Table_4.xlsx]

## Sheet: ATH gene prom with SLIM1 EBM
motif name	motif ID	motif consensus sequence	gene ID	# of hits per gene	promoter search window	start	end	match
SLIM1 enriched binding motif (EBM)	M0680_1.02	[A/C/G/T]AATG[T/A]A[C/T]CT[A/C/G/T]	AT1G01380	1	-1000 bp to TSS	215	205	CAGATTCATTC
SLIM1 enriched binding motif (EBM)	M0680_1.02	[A/C/G/T]AATG[T/A]A[C/T]CT[A/C/G/T]	AT1G04260	1	-1000 bp to TSS	702	692	CAGATTCATTC
SLIM1 enriched binding motif (EBM)	M0680_1.02	[A/C/G/T]AATG[T/A]A[C/T]CT[A/C/G/T]	AT1G05837	1	-1000 bp to TSS	598	588	CAGATTCATTC
SLIM1 enriched binding motif (EBM)	M0680_1.02	[A/C/G/T]AATG[T/A]A[C/T]CT[A/C/G/T]	AT1G06460	1	-1000 bp to TSS	547	557	GAATGAATCTG
SLIM1 enriched binding motif (EBM)	M0680_1.02	[A/C/G/T]AATG[T/A]A[C/T]CT[A/C/G/T]	AT1G07703	1	-1000 bp to TSS	544	554	GAATGTACCTG
SLIM1 enriched binding motif (EBM)	M0680_1.02	[A/C/G/T]AATG[T/A]A[C/T]CT[A/C/G/T]	AT1G08453	1	-1000 bp to TSS	812	802	CAGGTTCATTC
SLIM1 enriched binding motif (EBM)	M0680_1.02	[A/C/G/T]AATG[T/A]A[C/T]CT[A/C/G/T]	AT1G12030	1	-1000 bp to TSS	736	746	GAATGTATCTG
SLIM1 enriched binding motif (EBM)	M0680_1.02	[A/C/G/T]AATG[T/A]A[C/T]CT[A/C/G/T]	AT1G12660	1	-1000 bp to TSS	662	652	CAGGTACATTC
SLIM1 enriched binding motif (EBM)	M0680_1.02	[A/C/G/T]AATG[T/A]A[C/T]CT[A/C/G/T]	AT1G15870	1	-1000 bp to TSS	935	925	CAGATTCATTC
SLIM1 enriched binding motif (EBM)	M0680_1.02	[A/C/G/T]AATG[T/A]A[C/T]CT[A/C/G/T]	AT1G21240	1	-1000 bp to TSS	243	253	GAATGAATCTG
SLIM1 enriched binding motif (EBM)	M0680_1.02	[A/C/G/T]AATG[T/A]A[C/T]CT[A/C/G/T]	AT1G21590	1	-1000 bp to TSS	930	940	GAATGTATCTG
SLIM1 enriched binding motif (EBM)	M0680_1.02	[A/C/G/T]AATG[T/A]A[C/T]CT[A/C/G/T]	AT1G21650	1	-1000 bp to TSS	105	115	GAATGAATCTG
SLIM1 enriched binding motif (EBM)	M0680_1.02	[A/C/G/T]AATG[T/A]A[C/T]CT[A/C/G/T]	AT1G21651	1	-1000 bp to TSS	91	101	GAATGAATCTG
SLIM1 enriched binding motif (EBM)	M0680_1.02	[A/C/G/T]AATG[T/A]A[C/T]CT[A/C/G/T]	AT1G21660	1	-1000 bp to TSS	506	496	CAGATTCATTC
SLIM1 enriched binding motif (EBM)	M0680_1.02	[A/C/G/T]AATG[T/A]A[C/T]CT[A/C/G/T]	AT1G22080	1	-1000 bp to TSS	679	669	CAGATTCATTC
SLIM1 enriched binding motif (EBM)	M0680_1.02	[A/C/G/T]AATG[T/A]A[C/T]CT[A/C/G/T]	AT1G30290	1	-1000 bp to TSS	552	562	GAATGTACCTG
SLIM1 enriched binding motif (EBM)	M0680_1.02	[A/C/G/T]AATG[T/A]A[C/T]CT[A/C/G/T]	AT1G45234	1	-1000 bp to TSS	70	60	CAGGTACATTC
SLIM1 enriched binding motif (EBM)	M0680_1.02	[A/C/G/T]AATG[T/A]A[C/T]CT[A/C/G/T]	AT1G53060	1	-1000 bp to TSS	241	231	CAGGTTCATTC
SLIM1 enriched binding motif (EBM)	M0680_1.02	[A/C/G/T]AATG[T/A]A[C/T]CT[A/C/G/T]	AT1G56320	1	-1000 bp to TSS	69	79	GAATGTATCTG
SLIM1 enriched binding motif (EBM)	M0680_1.02	[A/C/G/T]AATG[T/A]A[C/T]CT[A/C/G/T]	AT1G62020	1	-1000 bp to TSS	295	305	GAATGAACCTG
SLIM1 enriched binding motif (EBM)	M0680_1.02	[A/C/G/T]AATG[T/A]A[C/T]CT[A/C/G/T]	AT1G68670	1	-1000 bp to TSS	111	121	GAATGAATCTG
SLIM1 enriched binding motif (EBM)	M0680_1.02	[A/C/G/T]AATG[T/A]A[C/T]CT[A/C/G/T]	AT1G73640	1	-1000 bp to TSS	528	518	CAGATTCATTC
SLIM1 enriched binding motif (EBM)	M0680_1.02	[A/C/G/T]AATG[T/A]A[C/T]CT[A/C/G/T]	AT1G79210	1	-1000 bp to TSS	476	466	CAGATTCATTC
SLIM1 enriched binding motif (EBM)	M0680_1.02	[A/C/G/T]AATG[T/A]A[C/T]CT[A/C/G/T]	AT2G07205	1	-1000 bp to TSS	29	19	CAGATTCATTC
SLIM1 enriched binding motif (EBM)	M0680_1.02	[A/C/G/T]AATG[T/A]A[C/T]CT[A/C/G/T]	AT2G08615	1	-1000 bp to TSS	818	808	CAGATACATTC
SLIM1 enriched binding motif (EBM)	M0680_1.02	[A/C/G/T]AATG[T/A]A[C/T]CT[A/C/G/T]	AT2G08625	1	-1000 bp to TSS	607	597	CAGATACATTC
SLIM1 enriched binding motif (EBM)	M0680_1.02	[A/C/G/T]AATG[T/A]A[C/T]CT[A/C/G/T]	AT2G13450	1	-1000 bp to TSS	277	267	CAGGTACATTC
SLIM1 enriched binding motif (EBM)	M0680_1.02	[A/C/G/T]AATG[T/A]A[C/T]CT[A/C/G/T]	AT2G20585	1	-1000 bp to TSS	619	609	CAGATACATTC
SLIM1 enriched binding motif (EBM)	M0680_1.02	[A/C/G/T]AATG[T/A]A[C/T]CT[A/C/G/T]	AT2G24370	1	-1000 bp to TSS	132	142	GAATGAATCTG
SLIM1 enriched binding motif (EBM)	M0680_1.02	[A/C/G/T]AATG[T/A]A[C/T]CT[A/C/G/T]	AT2G25490	1	-1000 bp to TSS	39	29	CAGATACATTC
SLIM1 enriched binding motif (EBM)	M0680_1.02	[A/C/G/T]AATG[T/A]A[C/T]CT[A/C/G/T]	AT2G31380	1	-1000 bp to TSS	125	115	CAGATTCATTC
SLIM1 enriched binding motif (EBM)	M0680_1.02	[A/C/G/T]AATG[T/A]A[C/T]CT[A/C/G/T]	AT2G33780	1	-1000 bp to TSS	504	514	GAATGTATCTG
SLIM1 enriched binding motif (EBM)	M0680_1.02	[A/C/G/T]AATG[T/A]A[C/T]CT[A/C/G/T]	AT2G34280	1	-1000 bp to TSS	433	443	GAATGTATCTG
SLIM1 enriched binding motif (EBM)	M0680_1.02	[A/C/G/T]AATG[T/A]A[C/T]CT[A/C/G/T]	AT2G36400	1	-1000 bp to TSS	626	616	CAGATTCATTC
SLIM1 enriched binding motif (EBM)	M0680_1.02	[A/C/G/T]AATG[T/A]A[C/T]CT[A/C/G/T]	AT2G36500	1	-1000 bp to TSS	240	230	CAGATTCATTC
SLIM1 enriched binding motif (EBM)	M0680_1.02	[A/C/G/T]AATG[T/A]A[C/T]CT[A/C/G/T]	AT2G39010	1	-1000 bp to TSS	324	314	CAGATACATTC
SLIM1 enriched binding motif (EBM)	M0680_1.02	[A/C/G/T]AATG[T/A]A[C/T]CT[A/C/G/T]	AT2G41451	1	-1000 bp to TSS	726	736	GAATGAATCTG
SLIM1 enriched binding motif (EBM)	M0680_1.02	[A/C/G/T]AATG[T/A]A[C/T]CT[A/C/G/T]	AT3G01920	1	-1000 bp to TSS	373	383	GAATGAACCTG
SLIM1 enriched binding motif (EBM)	M0680_1.02	[A/C/G/T]AATG[T/A]A[C/T]CT[A/C/G/T]	AT3G02415	1	-1000 bp to TSS	160	170	GAATGAATCTG
SLIM1 enriched binding motif (EBM)	M0680_1.02	[A/C/G/T]AATG[T/A]A[C/T]CT[A/C/G/T]	AT3G11150	1	-1000 bp to TSS	332	322	CAGATACATTC
SLIM1 enriched binding motif (EBM)	M0680_1.02	[A/C/G/T]AATG[T/A]A[C/T]CT[A/C/G/T]	AT3G11710	1	-1000 bp to TSS	111	121	GAATGAATCTG
SLIM1 enriched binding motif (EBM)	M0680_1.02	[A/C/G/T]AATG[T/A]A[C/T]CT[A/C/G/T]	AT3G17400	1	-1000 bp to TSS	160	150	CAGATTCATTC
SLIM1 enriched binding motif (EBM)	M0680_1.02	[A/C/G/T]AATG[T/A]A[C/T]CT[A/C/G/T]	AT3G18180	1	-1000 bp to TSS	64	74	GAATGAATCTG
SLIM1 enriched binding motif (EBM)	M0680_1.02	[A/C/G/T]AATG[T/A]A[C/T]CT[A/C/G/T]	AT3G18380	1	-1000 bp to TSS	72	62	CAGATACATTC
SLIM1 enriched binding motif (EBM)	M0680_1.02	[A/C/G/T]AATG[T/A]A[C/T]CT[A/C/G/T]	AT3G25221	1	-1000 bp to TSS	34	44	GAATGAATCTG
SLIM1 enriched binding motif (EBM)	M0680_1.02	[A/C/G/T]AATG[T/A]A[C/T]CT[A/C/G/T]	AT3G27230	1	-1000 bp to TSS	7	17	GAATGAACCTG
SLIM1 enriched binding motif (EBM)	M0680_1.02	[A/C/G/T]AATG[T/A]A[C/T]CT[A/C/G/T]	AT3G27600	1	-1000 bp to TSS	163	153	CAGATACATTC
SLIM1 enriched binding motif (EBM)	M0680_1.02	[A/C/G/T]AATG[T/A]A[C/T]CT[A/C/G/T]	AT3G42640	1	-1000 bp to TSS	340	350	GAATGAATCTG
SLIM1 enriched binding motif (EBM)	M0680_1.02	[A/C/G/T]AATG[T/A]A[C/T]CT[A/C/G/T]	AT3G45470	1	-1000 bp to TSS	793	803	GAATGAATCTG
SLIM1 enriched binding motif (EBM)	M0680_1.02	[A/C/G/T]AATG[T/A]A[C/T]CT[A/C/G/T]	AT3G48440	1	-1000 bp to TSS	644	654	GAATGAATCTG
SLIM1 enriched binding motif (EBM)	M0680_1.02	[A/C/G/T]AATG[T/A]A[C/T]CT[A/C/G/T]	AT4G02130	1	-1000 bp to TSS	455	465	GAATGTATCTG
SLIM1 enriched binding motif (EBM)	M0680_1.02	[A/C/G/T]AATG[T/A]A[C/T]CT[A/C/G/T]	AT4G02430	1	-1000 bp to TSS	127	117	CAGATTCATTC
SLIM1 enriched binding motif (EBM)	M0680_1.02	[A/C/G/T]AATG[T/A]A[C/T]CT[A/C/G/T]	AT4G04055	1	-1000 bp to TSS	852	862	GAATGTATCTG
SLIM1 enriched binding motif (EBM)	M0680_1.02	[A/C/G/T]AATG[T/A]A[C/T]CT[A/C/G/T]	AT4G04960	1	-1000 bp to TSS	23	13	CAGATTCATTC
SLIM1 enriched binding motif (EBM)	M0680_1.02	[A/C/G/T]AATG[T/A]A[C/T]CT[A/C/G/T]	AT4G05135	1	-1000 bp to TSS	306	296	CAGGTTCATTC
SLIM1 enriched binding motif (EBM)	M0680_1.02	[A/C/G/T]AATG[T/A]A[C/T]CT[A/C/G/T]	AT4G05270	1	-1000 bp to TSS	768	758	CAGATACATTC
SLIM1 enriched binding motif (EBM)	M0680_1.02	[A/C/G/T]AATG[T/A]A[C/T]CT[A/C/G/T]	AT4G05695	1	-1000 bp to TSS	435	425	CAGATTCATTC
SLIM1 enriched binding motif (EBM)	M0680_1.02	[A/C/G/T]AATG[T/A]A[C/T]CT[A/C/G/T]	AT4G07195	1	-1000 bp to TSS	554	564	GAATGAATCTG
SLIM1 enriched binding motif (EBM)	M0680_1.02	[A/C/G/T]AATG[T/A]A[C/T]CT[A/C/G/T]	AT4G16510	1	-1000 bp to TSS	175	165	CAGATACATTC
SLIM1 enriched binding motif (EBM)	M0680_1.02	[A/C/G/T]AATG[T/A]A[C/T]CT[A/C/G/T]	AT4G24530	1	-1000 bp to TSS	58	68	GAATGAATCTG
SLIM1 enriched binding motif (EBM)	M0680_1.02	[A/C/G/T]AATG[T/A]A[C/T]CT[A/C/G/T]	AT4G34480	1	-1000 bp to TSS	166	156	CAGATTCATTC
SLIM1 enriched binding motif (EBM)	M0680_1.02	[A/C/G/T]AATG[T/A]A[C/T]CT[A/C/G/T]	AT5G05365	1	-1000 bp to TSS	409	419	GAATGAATCTG
SLIM1 enriched binding motif (EBM)	M0680_1.02	[A/C/G/T]AATG[T/A]A[C/T]CT[A/C/G/T]	AT5G05985	1	-1000 bp to TSS	582	592	GAATGAATCTG
SLIM1 enriched binding motif (EBM)	M0680_1.02	[A/C/G/T]AATG[T/A]A[C/T]CT[A/C/G/T]	AT5G05987	1	-1000 bp to TSS	501	511	GAATGAATCTG
SLIM1 enriched binding motif (EBM)	M0680_1.02	[A/C/G/T]AATG[T/A]A[C/T]CT[A/C/G/T]	AT5G08695	1	-1000 bp to TSS	313	303	CAGATTCATTC
SLIM1 enriched binding motif (EBM)	M0680_1.02	[A/C/G/T]AATG[T/A]A[C/T]CT[A/C/G/T]	AT5G10260	1	-1000 bp to TSS	155	165	GAATGTATCTG
SLIM1 enriched binding motif (EBM)	M0680_1.02	[A/C/G/T]AATG[T/A]A[C/T]CT[A/C/G/T]	AT5G11550	1	-1000 bp to TSS	306	296	CAGGTTCATTC
SLIM1 enriched binding motif (EBM)	M0680_1.02	[A/C/G/T]AATG[T/A]A[C/T]CT[A/C/G/T]	AT5G13070	1	-1000 bp to TSS	94	84	CAGATACATTC
SLIM1 enriched binding motif (EBM)	M0680_1.02	[A/C/G/T]AATG[T/A]A[C/T]CT[A/C/G/T]	AT5G14515	1	-1000 bp to TSS	910	920	GAATGAATCTG
SLIM1 enriched binding motif (EBM)	M0680_1.02	[A/C/G/T]AATG[T/A]A[C/T]CT[A/C/G/T]	AT5G18636	1	-1000 bp to TSS	188	178	CAGGTACATTC
SLIM1 enriched binding motif (EBM)	M0680_1.02	[A/C/G/T]AATG[T/A]A[C/T]CT[A/C/G/T]	AT5G19025	1	-1000 bp to TSS	644	634	CAGGTTCATTC
SLIM1 enriched binding motif (EBM)	M0680_1.02	[A/C/G/T]AATG[T/A]A[C/T]CT[A/C/G/T]	AT5G19410	1	-1000 bp to TSS	686	676	CAGATTCATTC
SLIM1 enriched binding motif (EBM)	M0680_1.02	[A/C/G/T]AATG[T/A]A[C/T]CT[A/C/G/T]	AT5G25200	1	-1000 bp to TSS	31	21	CAGGTACATTC
SLIM1 enriched binding motif (EBM)	M0680_1.02	[A/C/G/T]AATG[T/A]A[C/T]CT[A/C/G/T]	AT5G38000	1	-1000 bp to TSS	745	735	CAGATACATTC
SLIM1 enriched binding motif (EBM)	M0680_1.02	[A/C/G/T]AATG[T/A]A[C/T]CT[A/C/G/T]	AT1G04250	1	-1000 bp to TSS	369	358	TGTCTAGATACA
SLIM1 enriched binding motif (EBM)	M0680_1.02	[A/C/G/T]AATG[T/A]A[C/T]CT[A/C/G/T]	AT1G04253	1	-1000 bp to TSS	552	563	TGTATCTAGACA
SLIM1 enriched binding motif (EBM)	M0680_1.02	[A/C/G/T]AATG[T/A]A[C/T]CT[A/C/G/T]	AT1G08920	1	-1000 bp to TSS	622	633	TGTATCTAGACA
SLIM1 enriched binding motif (EBM)	M0680_1.02	[A/C/G/T]AATG[T/A]A[C/T]CT[A/C/G/T]	AT1G18860	1	-1000 bp to TSS	191	202	TGTATCTAGACA
SLIM1 enriched binding motif (EBM)	M0680_1.02	[A/C/G/T]AATG[T/A]A[C/T]CT[A/C/G/T]	AT1G54095	1	-1000 bp to TSS	480	469	TGTCTAGATACA
SLIM1 enriched binding motif (EBM)	M0680_1.02	[A/C/G/T]AATG[T/A]A[C/T]CT[A/C/G/T]	AT2G39210	1	-1000 bp to TSS	837	826	TGTCTAGATACA
SLIM1 enriched binding motif (EBM)	M0680_1.02	[A/C/G/T]AATG[T/A]A[C/T]CT[A/C/G/T]	AT2G41860	1	-1000 bp to TSS	777	766	TGTCTAGATACA
SLIM1 enriched binding motif (EBM)	M0680_1.02	[A/C/G/T]AATG[T/A]A[C/T]CT[A/C/G/T]	AT3G19870	1	-1000 bp to TSS	577	566	TGTCTAGATACA
SLIM1 enriched binding motif (EBM)	M0680_1.02	[A/C/G/T]AATG[T/A]A[C/T]CT[A/C/G/T]	AT3G14990	1	-1000 bp to TSS	762	773	AGAACCAGGACG
SLIM1 enriched binding motif (EBM)	M0680_1.02	[A/C/G/T]AATG[T/A]A[C/T]CT[A/C/G/T]	AT1G05410	2	-1000 bp to TSS	80	87	ATGTACCT
SLIM1 enriched binding motif (EBM)	M0680_1.02	[A/C/G/T]AATG[T/A]A[C/T]CT[A/C/G/T]	AT1G05410	2	-1000 bp to TSS	511	504	AGGTACAT
SLIM1 enriched binding motif (EBM)	M0680_1.02	[A/C/G/T]AATG[T/A]A[C/T]CT[A/C/G/T]	AT1G05713	2	-1000 bp to TSS	588	581	AGGTACAT
SLIM1 enriched binding motif (EBM)	M0680_1.02	[A/C/G/T]AATG[T/A]A[C/T]CT[A/C/G/T]	AT1G05713	2	-1000 bp to TSS	657	650	AGGTACAT
SLIM1 enriched binding motif (EBM)	M0680_1.02	[A/C/G/T]AATG[T/A]A[C/T]CT[A/C/G/T]	AT1G18230	2	-1000 bp to TSS	106	99	AGGTACAT
SLIM1 enriched binding motif (EBM)	M0680_1.02	[A/C/G/T]AATG[T/A]A[C/T]CT[A/C/G/T]	AT1G18230	2	-1000 bp to TSS	536	529	AGGTACAT
SLIM1 enriched binding motif (EBM)	M0680_1.02	[A/C/G/T]AATG[T/A]A[C/T]CT[A/C/G/T]	AT1G66630	2	-1000 bp to TSS	276	283	ATGTACCT
SLIM1 enriched binding motif (EBM)	M0680_1.02	[A/C/G/T]AATG[T/A]A[C/T]CT[A/C/G/T]	AT1G66630	2	-1000 bp to TSS	824	831	ATGTACCT
SLIM1 enriched binding motif (EBM)	M0680_1.02	[A/C/G/T]AATG[T/A]A[C/T]CT[A/C/G/T]	AT1G77320	2	-1000 bp to TSS	669	662	AGGTACAT
SLIM1 enriched binding motif (EBM)	M0680_1.02	[A/C/G/T]AATG[T/A]A[C/T]CT[A/C/G/T]	AT1G77320	2	-1000 bp to TSS	705	698	AGGTACAT
SLIM1 enriched binding motif (EBM)	M0680_1.02	[A/C/G/T]AATG[T/A]A[C/T]CT[A/C/G/T]	AT2G22990	2	-1000 bp to TSS	262	255	AGGTACAT
SLIM1 enriched binding motif (EBM)	M0680_1.02	[A/C/G/T]AATG[T/A]A[C/T]CT[A/C/G/T]	AT2G22990	2	-1000 bp to TSS	409	402	AGGTACAT
SLIM1 enriched binding motif (EBM)	M0680_1.02	[A/C/G/T]AATG[T/A]A[C/T]CT[A/C/G/T]	AT2G27145	2	-1000 bp to TSS	943	936	AGGTACAT
SLIM1 enriched binding motif (EBM)	M0680_1.02	[A/C/G/T]AATG[T/A]A[C/T]CT[A/C/G/T]	AT2G27145	2	-1000 bp to TSS	973	966	AGGTACAT
SLIM1 enriched binding motif (EBM)	M0680_1.02	[A/C/G/T]AATG[T/A]A[C/T]CT[A/C/G/T]	AT2G27150	2	-1000 bp to TSS	66	73	ATGTACCT
SLIM1 enriched binding motif (EBM)	M0680_1.02	[A/C/G/T]AATG[T/A]A[C/T]CT[A/C/G/T]	AT2G27150	2	-1000 bp to TSS	96	103	ATGTACCT
SLIM1 enriched binding motif (EBM)	M0680_1.02	[A/C/G/T]AATG[T/A]A[C/T]CT[A/C/G/T]	AT2G32380	2	-1000 bp to TSS	413	406	AGGTACAT
SLIM1 enriched binding motif (EBM)	M0680_1.02	[A/C/G/T]AATG[T/A]A[C/T]CT[A/C/G/T]	AT2G32380	2	-1000 bp to TSS	551	558	ATGTACCT
SLIM1 enriched binding motif (EBM)	M0680_1.02	[A/C/G/T]AATG[T/A]A[C/T]CT[A/C/G/T]	AT3G04225	2	-1000 bp to TSS	414	407	AGGTACAT
SLIM1 enriched binding motif (EBM)	M0680_1.02	[A/C/G/T]AATG[T/A]A[C/T]CT[A/C/G/T]	AT3G04225	2	-1000 bp to TSS	440	433	AGGTACAT
SLIM1 enriched binding motif (EBM)	M0680_1.02	[A/C/G/T]AATG[T/A]A[C/T]CT[A/C/G/T]	AT3G29034	2	-1000 bp to TSS	405	398	AGGTACAT
SLIM1 enriched binding motif (EBM)	M0680_1.02	[A/C/G/T]AATG[T/A]A[C/T]CT[A/C/G/T]	AT3G29034	2	-1000 bp to TSS	433	426	AGGTACAT
SLIM1 enriched binding motif (EBM)	M0680_1.02	[A/C/G/T]AATG[T/A]A[C/T]CT[A/C/G/T]	AT3G57420	2	-1000 bp to TSS	475	482	ATGTACCT
SLIM1 enriched binding motif (EBM)	M0680_1.02	[A/C/G/T]AATG[T/A]A[C/T]CT[A/C/G/T]	AT3G57420	2	-1000 bp to TSS	953	960	ATGTACCT
SLIM1 enriched binding motif (EBM)	M0680_1.02	[A/C/G/T]AATG[T/A]A[C/T]CT[A/C/G/T]	AT5G04115	2	-1000 bp to TSS	240	233	AGGTACAT
SLIM1 enriched binding motif (EBM)	M0680_1.02	[A/C/G/T]AATG[T/A]A[C/T]CT[A/C/G/T]	AT5G04115	2	-1000 bp to TSS	267	260	AGGTACAT
SLIM1 enriched binding motif (EBM)	M0680_1.02	[A/C/G/T]AATG[T/A]A[C/T]CT[A/C/G/T]	AT5G04605	2	-1000 bp to TSS	128	135	ATGTACCT
SLIM1 enriched binding motif (EBM)	M0680_1.02	[A/C/G/T]AATG[T/A]A[C/T]CT[A/C/G/T]	AT5G04605	2	-1000 bp to TSS	159	152	AGGTACAT
SLIM1 enriched binding motif (EBM)	M0680_1.02	[A/C/G/T]AATG[T/A]A[C/T]CT[A/C/G/T]	AT5G28740	2	-1000 bp to TSS	5	12	ATGTACCT
SLIM1 enriched binding motif (EBM)	M0680_1.02	[A/C/G/T]AATG[T/A]A[C/T]CT[A/C/G/T]	AT5G28740	2	-1000 bp to TSS	194	201	ATGTACCT
SLIM1 enriched binding motif (EBM)	M0680_1.02	[A/C/G/T]AATG[T/A]A[C/T]CT[A/C/G/T]	AT5G63145	2	-1000 bp to TSS	35	28	AGGTACAT
SLIM1 enriched binding motif (EBM)	M0680_1.02	[A/C/G/T]AATG[T/A]A[C/T]CT[A/C/G/T]	AT5G63145	2	-1000 bp to TSS	243	236	AGGTACAT
SLIM1 enriched binding motif (EBM)	M0680_1.02	[A/C/G/T]AATG[T/A]A[C/T]CT[A/C/G/T]	AT5G66045	2	-1000 bp to TSS	86	79	AGGTACAT
SLIM1 enriched binding motif (EBM)	M0680_1.02	[A/C/G/T]AATG[T/A]A[C/T]CT[A/C/G/T]	AT5G66045	2	-1000 bp to TSS	445	452	ATGTACCT
SLIM1 enriched binding motif (EBM)	M0680_1.02	[A/C/G/T]AATG[T/A]A[C/T]CT[A/C/G/T]	AT1G01070	1	-1000 bp to TSS	764	771	ATGTACCT
SLIM1 enriched binding motif (EBM)	M0680_1.02	[A/C/G/T]AATG[T/A]A[C/T]CT[A/C/G/T]	AT1G01230	1	-1000 bp to TSS	442	449	ATGTACCT
SLIM1 enriched binding motif (EBM)	M0680_1.02	[A/C/G/T]AATG[T/A]A[C/T]CT[A/C/G/T]	AT1G01370	1	-1000 bp to TSS	936	929	AGGTACAT
SLIM1 enriched binding motif (EBM)	M0680_1.02	[A/C/G/T]AATG[T/A]A[C/T]CT[A/C/G/T]	AT1G01560	1	-1000 bp to TSS	87	94	ATGTACCT
SLIM1 enriched binding motif (EBM)	M0680_1.02	[A/C/G/T]AATG[T/A]A[C/T]CT[A/C/G/T]	AT1G02205	1	-1000 bp to TSS	111	104	AGGTACAT
SLIM1 enriched binding motif (EBM)	M0680_1.02	[A/C/G/T]AATG[T/A]A[C/T]CT[A/C/G/T]	AT1G02850	1	-1000 bp to TSS	127	120	AGGTACAT
SLIM1 enriched binding motif (EBM)	M0680_1.02	[A/C/G/T]AATG[T/A]A[C/T]CT[A/C/G/T]	AT1G02980	1	-1000 bp to TSS	780	773	AGGTACAT
SLIM1 enriched binding motif (EBM)	M0680_1.02	[A/C/G/T]AATG[T/A]A[C/T]CT[A/C/G/T]	AT1G03000	1	-1000 bp to TSS	405	412	ATGTACCT
SLIM1 enriched binding motif (EBM)	M0680_1.02	[A/C/G/T]AATG[T/A]A[C/T]CT[A/C/G/T]	AT1G03260	1	-1000 bp to TSS	660	653	AGGTACAT
SLIM1 enriched binding motif (EBM)	M0680_1.02	[A/C/G/T]AATG[T/A]A[C/T]CT[A/C/G/T]	AT1G03270	1	-1000 bp to TSS	718	725	ATGTACCT
SLIM1 enriched binding motif (EBM)	M0680_1.02	[A/C/G/T]AATG[T/A]A[C/T]CT[A/C/G/T]	AT1G03640	1	-1000 bp to TSS	606	613	ATGTACCT
SLIM1 enriched binding motif (EBM)	M0680_1.02	[A/C/G/T]AATG[T/A]A[C/T]CT[A/C/G/T]	AT1G03940	1	-1000 bp to TSS	374	367	AGGTACAT
SLIM1 enriched binding motif (EBM)	M0680_1.02	[A/C/G/T]AATG[T/A]A[C/T]CT[A/C/G/T]	AT1G04070	1	-1000 bp to TSS	698	705	ATGTACCT
SLIM1 enriched binding motif (EBM)	M0680_1.02	[A/C/G/T]AATG[T/A]A[C/T]CT[A/C/G/T]	AT1G04177	1	-1000 bp to TSS	150	143	AGGTACAT
SLIM1 enriched binding motif (EBM)	M0680_1.02	[A/C/G/T]AATG[T/A]A[C/T]CT[A/C/G/T]	AT1G04300	1	-1000 bp to TSS	947	940	AGGTACAT
SLIM1 enriched binding motif (EBM)	M0680_1.02	[A/C/G/T]AATG[T/A]A[C/T]CT[A/C/G/T]	AT1G04657	1	-1000 bp to TSS	389	382	AGGTACAT
SLIM1 enriched binding motif (EBM)	M0680_1.02	[A/C/G/T]AATG[T/A]A[C/T]CT[A/C/G/T]	AT1G04667	1	-1000 bp to TSS	927	934	ATGTACCT
SLIM1 enriched binding motif (EBM)	M0680_1.02	[A/C/G/T]AATG[T/A]A[C/T]CT[A/C/G/T]	AT1G04690	1	-1000 bp to TSS	670	663	AGGTACAT
SLIM1 enriched binding motif (EBM)	M0680_1.02	[A/C/G/T]AATG[T/A]A[C/T]CT[A/C/G/T]	AT1G04717	1	-1000 bp to TSS	314	307	AGGTACAT
SLIM1 enriched binding motif (EBM)	M0680_1.02	[A/C/G/T]AATG[T/A]A[C/T]CT[A/C/G/T]	AT1G04837	1	-1000 bp to TSS	906	899	AGGTACAT
SLIM1 enriched binding motif (EBM)	M0680_1.02	[A/C/G/T]AATG[T/A]A[C/T]CT[A/C/G/T]	AT1G04857	1	-1000 bp to TSS	833	840	ATGTACCT
SLIM1 enriched binding motif (EBM)	M0680_1.02	[A/C/G/T]AATG[T/A]A[C/T]CT[A/C/G/T]	AT1G04930	1	-1000 bp to TSS	15	8	AGGTACAT
SLIM1 enriched binding motif (EBM)	M0680_1.02	[A/C/G/T]AATG[T/A]A[C/T]CT[A/C/G/T]	AT1G04990	1	-1000 bp to TSS	968	961	AGGTACAT
SLIM1 enriched binding motif (EBM)	M0680_1.02	[A/C/G/T]AATG[T/A]A[C/T]CT[A/C/G/T]	AT1G05160	1	-1000 bp to TSS	674	667	AGGTACAT
SLIM1 enriched binding motif (EBM)	M0680_1.02	[A/C/G/T]AATG[T/A]A[C/T]CT[A/C/G/T]	AT1G05173	1	-1000 bp to TSS	989	996	ATGTACCT
SLIM1 enriched binding motif (EBM)	M0680_1.02	[A/C/G/T]AATG[T/A]A[C/T]CT[A/C/G/T]	AT1G05533	1	-1000 bp to TSS	964	957	AGGTACAT
SLIM1 enriched binding motif (EBM)	M0680_1.02	[A/C/G/T]AATG[T/A]A[C/T]CT[A/C/G/T]	AT1G05727	1	-1000 bp to TSS	131	138	ATGTACCT
SLIM1 enriched binding motif (EBM)	M0680_1.02	[A/C/G/T]AATG[T/A]A[C/T]CT[A/C/G/T]	AT1G06023	1	-1000 bp to TSS	803	810	ATGTACCT
SLIM1 enriched binding motif (EBM)	M0680_1.02	[A/C/G/T]AATG[T/A]A[C/T]CT[A/C/G/T]	AT1G06083	1	-1000 bp to TSS	163	156	AGGTACAT
SLIM1 enriched binding motif (EBM)	M0680_1.02	[A/C/G/T]AATG[T/A]A[C/T]CT[A/C/G/T]	AT1G06103	1	-1000 bp to TSS	751	744	AGGTACAT
SLIM1 enriched binding motif (EBM)	M0680_1.02	[A/C/G/T]AATG[T/A]A[C/T]CT[A/C/G/T]	AT1G06190	1	-1000 bp to TSS	26	19	AGGTACAT
SLIM1 enriched binding motif (EBM)	M0680_1.02	[A/C/G/T]AATG[T/A]A[C/T]CT[A/C/G/T]	AT1G06637	1	-1000 bp to TSS	351	358	ATGTACCT
SLIM1 enriched binding motif (EBM)	M0680_1.02	[A/C/G/T]AATG[T/A]A[C/T]CT[A/C/G/T]	AT1G06890	1	-1000 bp to TSS	294	287	AGGTACAT
SLIM1 enriched binding motif (EBM)	M0680_1.02	[A/C/G/T]AATG[T/A]A[C/T]CT[A/C/G/T]	AT1G06913	1	-1000 bp to TSS	484	477	AGGTACAT
SLIM1 enriched binding motif (EBM)	M0680_1.02	[A/C/G/T]AATG[T/A]A[C/T]CT[A/C/G/T]	AT1G07023	1	-1000 bp to TSS	914	907	AGGTACAT
SLIM1 enriched binding motif (EBM)	M0680_1.02	[A/C/G/T]AATG[T/A]A[C/T]CT[A/C/G/T]	AT1G07110	1	-1000 bp to TSS	166	159	AGGTACAT
SLIM1 enriched binding motif (EBM)	M0680_1.02	[A/C/G/T]AATG[T/A]A[C/T]CT[A/C/G/T]	AT1G07137	1	-1000 bp to TSS	745	738	AGGTACAT
SLIM1 enriched binding motif (EBM)	M0680_1.02	[A/C/G/T]AATG[T/A]A[C/T]CT[A/C/G/T]	AT1G07323	1	-1000 bp to TSS	604	611	ATGTACCT
SLIM1 enriched binding motif (EBM)	M0680_1.02	[A/C/G/T]AATG[T/A]A[C/T]CT[A/C/G/T]	AT1G07360	1	-1000 bp to TSS	51	58	ATGTACCT
SLIM1 enriched binding motif (EBM)	M0680_1.02	[A/C/G/T]AATG[T/A]A[C/T]CT[A/C/G/T]	AT1G07560	1	-1000 bp to TSS	20	13	AGGTACAT
SLIM1 enriched binding motif (EBM)	M0680_1.02	[A/C/G/T]AATG[T/A]A[C/T]CT[A/C/G/T]	AT1G07615	1	-1000 bp to TSS	848	855	ATGTACCT
SLIM1 enriched binding motif (EBM)	M0680_1.02	[A/C/G/T]AATG[T/A]A[C/T]CT[A/C/G/T]	AT1G07683	1	-1000 bp to TSS	361	354	AGGTACAT
SLIM1 enriched binding motif (EBM)	M0680_1.02	[A/C/G/T]AATG[T/A]A[C/T]CT[A/C/G/T]	AT1G07700	1	-1000 bp to TSS	44	37	AGGTACAT
SLIM1 enriched binding motif (EBM)	M0680_1.02	[A/C/G/T]AATG[T/A]A[C/T]CT[A/C/G/T]	AT1G07703	1	-1000 bp to TSS	546	553	ATGTACCT
SLIM1 enriched binding motif (EBM)	M0680_1.02	[A/C/G/T]AATG[T/A]A[C/T]CT[A/C/G/T]	AT1G07737	1	-1000 bp to TSS	697	690	AGGTACAT
SLIM1 enriched binding motif (EBM)	M0680_1.02	[A/C/G/T]AATG[T/A]A[C/T]CT[A/C/G/T]	AT1G07823	1	-1000 bp to TSS	356	349	AGGTACAT
SLIM1 enriched binding motif (EBM)	M0680_1.02	[A/C/G/T]AATG[T/A]A[C/T]CT[A/C/G/T]	AT1G07860	1	-1000 bp to TSS	588	581	AGGTACAT
SLIM1 enriched binding motif (EBM)	M0680_1.02	[A/C/G/T]AATG[T/A]A[C/T]CT[A/C/G/T]	AT1G07893	1	-1000 bp to TSS	886	879	AGGTACAT
SLIM1 enriched binding motif (EBM)	M0680_1.02	[A/C/G/T]AATG[T/A]A[C/T]CT[A/C/G/T]	AT1G08040	1	-1000 bp to TSS	819	826	ATGTACCT
SLIM1 enriched binding motif (EBM)	M0680_1.02	[A/C/G/T]AATG[T/A]A[C/T]CT[A/C/G/T]	AT1G08283	1	-1000 bp to TSS	571	564	AGGTACAT
SLIM1 enriched binding motif (EBM)	M0680_1.02	[A/C/G/T]AATG[T/A]A[C/T]CT[A/C/G/T]	AT1G08287	1	-1000 bp to TSS	102	109	ATGTACCT
SLIM1 enriched binding motif (EBM)	M0680_1.02	[A/C/G/T]AATG[T/A]A[C/T]CT[A/C/G/T]	AT1G08433	1	-1000 bp to TSS	956	963	ATGTACCT
SLIM1 enriched binding motif (EBM)	M0680_1.02	[A/C/G/T]AATG[T/A]A[C/T]CT[A/C/G/T]	AT1G08450	1	-1000 bp to TSS	182	189	ATGTACCT
SLIM1 enriched binding motif (EBM)	M0680_1.02	[A/C/G/T]AATG[T/A]A[C/T]CT[A/C/G/T]	AT1G08510	1	-1000 bp to TSS	778	785	ATGTACCT
SLIM1 enriched binding motif (EBM)	M0680_1.02	[A/C/G/T]AATG[T/A]A[C/T]CT[A/C/G/T]	AT1G08533	1	-1000 bp to TSS	106	99	AGGTACAT
SLIM1 enriched binding motif (EBM)	M0680_1.02	[A/C/G/T]AATG[T/A]A[C/T]CT[A/C/G/T]	AT1G08750	1	-1000 bp to TSS	98	105	ATGTACCT
SLIM1 enriched binding motif (EBM)	M0680_1.02	[A/C/G/T]AATG[T/A]A[C/T]CT[A/C/G/T]	AT1G08787	1	-1000 bp to TSS	82	75	AGGTACAT
SLIM1 enriched binding motif (EBM)	M0680_1.02	[A/C/G/T]AATG[T/A]A[C/T]CT[A/C/G/T]	AT1G08793	1	-1000 bp to TSS	542	535	AGGTACAT
SLIM1 enriched binding motif (EBM)	M0680_1.02	[A/C/G/T]AATG[T/A]A[C/T]CT[A/C/G/T]	AT1G08820	1	-1000 bp to TSS	968	961	AGGTACAT
SLIM1 enriched binding motif (EBM)	M0680_1.02	[A/C/G/T]AATG[T/A]A[C/T]CT[A/C/G/T]	AT1G08855	1	-1000 bp to TSS	57	50	AGGTACAT
SLIM1 enriched binding motif (EBM)	M0680_1.02	[A/C/G/T]AATG[T/A]A[C/T]CT[A/C/G/T]	AT1G09047	1	-1000 bp to TSS	772	779	ATGTACCT
SLIM1 enriched binding motif (EBM)	M0680_1.02	[A/C/G/T]AATG[T/A]A[C/T]CT[A/C/G/T]	AT1G09133	1	-1000 bp to TSS	424	417	AGGTACAT
SLIM1 enriched binding motif (EBM)	M0680_1.02	[A/C/G/T]AATG[T/A]A[C/T]CT[A/C/G/T]	AT1G09287	1	-1000 bp to TSS	91	98	ATGTACCT
SLIM1 enriched binding motif (EBM)	M0680_1.02	[A/C/G/T]AATG[T/A]A[C/T]CT[A/C/G/T]	AT1G09367	1	-1000 bp to TSS	723	730	ATGTACCT
SLIM1 enriched binding motif (EBM)	M0680_1.02	[A/C/G/T]AATG[T/A]A[C/T]CT[A/C/G/T]	AT1G09475	1	-1000 bp to TSS	796	803	ATGTACCT
SLIM1 enriched binding motif (EBM)	M0680_1.02	[A/C/G/T]AATG[T/A]A[C/T]CT[A/C/G/T]	AT1G09487	1	-1000 bp to TSS	491	484	AGGTACAT
SLIM1 enriched binding motif (EBM)	M0680_1.02	[A/C/G/T]AATG[T/A]A[C/T]CT[A/C/G/T]	AT1G09603	1	-1000 bp to TSS	222	229	ATGTACCT
SLIM1 enriched binding motif (EBM)	M0680_1.02	[A/C/G/T]AATG[T/A]A[C/T]CT[A/C/G/T]	AT1G09665	1	-1000 bp to TSS	895	902	ATGTACCT
SLIM1 enriched binding motif (EBM)	M0680_1.02	[A/C/G/T]AATG[T/A]A[C/T]CT[A/C/G/T]	AT1G09807	1	-1000 bp to TSS	229	236	ATGTACCT
SLIM1 enriched binding motif (EBM)	M0680_1.02	[A/C/G/T]AATG[T/A]A[C/T]CT[A/C/G/T]	AT1G09827	1	-1000 bp to TSS	21	28	ATGTACCT
SLIM1 enriched binding motif (EBM)	M0680_1.02	[A/C/G/T]AATG[T/A]A[C/T]CT[A/C/G/T]	AT1G09910	1	-1000 bp to TSS	432	425	AGGTACAT
SLIM1 enriched binding motif (EBM)	M0680_1.02	[A/C/G/T]AATG[T/A]A[C/T]CT[A/C/G/T]	AT1G10140	1	-1000 bp to TSS	131	138	ATGTACCT
SLIM1 enriched binding motif (EBM)	M0680_1.02	[A/C/G/T]AATG[T/A]A[C/T]CT[A/C/G/T]	AT1G10920	1	-1000 bp to TSS	827	834	ATGTACCT
SLIM1 enriched binding motif (EBM)	M0680_1.02	[A/C/G/T]AATG[T/A]A[C/T]CT[A/C/G/T]	AT1G11185	1	-1000 bp to TSS	508	515	ATGTACCT
SLIM1 enriched binding motif (EBM)	M0680_1.02	[A/C/G/T]AATG[T/A]A[C/T]CT[A/C/G/T]	AT1G11410	1	-1000 bp to TSS	520	513	AGGTACAT
SLIM1 enriched binding motif (EBM)	M0680_1.02	[A/C/G/T]AATG[T/A]A[C/T]CT[A/C/G/T]	AT1G11590	1	-1000 bp to TSS	561	554	AGGTACAT
SLIM1 enriched binding motif (EBM)	M0680_1.02	[A/C/G/T]AATG[T/A]A[C/T]CT[A/C/G/T]	AT1G12150	1	-1000 bp to TSS	251	244	AGGTACAT
SLIM1 enriched binding motif (EBM)	M0680_1.02	[A/C/G/T]AATG[T/A]A[C/T]CT[A/C/G/T]	AT1G12660	1	-1000 bp to TSS	660	653	AGGTACAT
SLIM1 enriched binding motif (EBM)	M0680_1.02	[A/C/G/T]AATG[T/A]A[C/T]CT[A/C/G/T]	AT1G12669	1	-1000 bp to TSS	117	110	AGGTACAT
SLIM1 enriched binding motif (EBM)	M0680_1.02	[A/C/G/T]AATG[T/A]A[C/T]CT[A/C/G/T]	AT1G12900	1	-1000 bp to TSS	13	6	AGGTACAT
SLIM1 enriched binding motif (EBM)	M0680_1.02	[A/C/G/T]AATG[T/A]A[C/T]CT[A/C/G/T]	AT1G12980	1	-1000 bp to TSS	962	969	ATGTACCT
SLIM1 enriched binding motif (EBM)	M0680_1.02	[A/C/G/T]AATG[T/A]A[C/T]CT[A/C/G/T]	AT1G13110	1	-1000 bp to TSS	687	680	AGGTACAT
SLIM1 enriched binding motif (EBM)	M0680_1.02	[A/C/G/T]AATG[T/A]A[C/T]CT[A/C/G/T]	AT1G13270	1	-1000 bp to TSS	385	392	ATGTACCT
SLIM1 enriched binding motif (EBM)	M0680_1.02	[A/C/G/T]AATG[T/A]A[C/T]CT[A/C/G/T]	AT1G13470	1	-1000 bp to TSS	865	858	AGGTACAT
SLIM1 enriched binding motif (EBM)	M0680_1.02	[A/C/G/T]AATG[T/A]A[C/T]CT[A/C/G/T]	AT1G13490	1	-1000 bp to TSS	765	772	ATGTACCT
SLIM1 enriched binding motif (EBM)	M0680_1.02	[A/C/G/T]AATG[T/A]A[C/T]CT[A/C/G/T]	AT1G13805	1	-1000 bp to TSS	131	124	AGGTACAT
SLIM1 enriched binding motif (EBM)	M0680_1.02	[A/C/G/T]AATG[T/A]A[C/T]CT[A/C/G/T]	AT1G13920	1	-1000 bp to TSS	646	639	AGGTACAT
SLIM1 enriched binding motif (EBM)	M0680_1.02	[A/C/G/T]AATG[T/A]A[C/T]CT[A/C/G/T]	AT1G13960	1	-1000 bp to TSS	756	763	ATGTACCT
SLIM1 enriched binding motif (EBM)	M0680_1.02	[A/C/G/T]AATG[T/A]A[C/T]CT[A/C/G/T]	AT1G14030	1	-1000 bp to TSS	207	214	ATGTACCT
SLIM1 enriched binding motif (EBM)	M0680_1.02	[A/C/G/T]AATG[T/A]A[C/T]CT[A/C/G/T]	AT1G14170	1	-1000 bp to TSS	966	959	AGGTACAT
SLIM1 enriched binding motif (EBM)	M0680_1.02	[A/C/G/T]AATG[T/A]A[C/T]CT[A/C/G/T]	AT1G14410	1	-1000 bp to TSS	920	913	AGGTACAT
SLIM1 enriched binding motif (EBM)	M0680_1.02	[A/C/G/T]AATG[T/A]A[C/T]CT[A/C/G/T]	AT1G14710	1	-1000 bp to TSS	61	54	AGGTACAT
SLIM1 enriched binding motif (EBM)	M0680_1.02	[A/C/G/T]AATG[T/A]A[C/T]CT[A/C/G/T]	AT1G15630	1	-1000 bp to TSS	955	962	ATGTACCT
SLIM1 enriched binding motif (EBM)	M0680_1.02	[A/C/G/T]AATG[T/A]A[C/T]CT[A/C/G/T]	AT1G16710	1	-1000 bp to TSS	204	197	AGGTACAT
SLIM1 enriched binding motif (EBM)	M0680_1.02	[A/C/G/T]AATG[T/A]A[C/T]CT[A/C/G/T]	AT1G17100	1	-1000 bp to TSS	671	664	AGGTACAT
SLIM1 enriched binding motif (EBM)	M0680_1.02	[A/C/G/T]AATG[T/A]A[C/T]CT[A/C/G/T]	AT1G17570	1	-1000 bp to TSS	779	786	ATGTACCT
SLIM1 enriched binding motif (EBM)	M0680_1.02	[A/C/G/T]AATG[T/A]A[C/T]CT[A/C/G/T]	AT1G17580	1	-1000 bp to TSS	286	293	ATGTACCT
SLIM1 enriched binding motif (EBM)	M0680_1.02	[A/C/G/T]AATG[T/A]A[C/T]CT[A/C/G/T]	AT1G17660	1	-1000 bp to TSS	975	982	ATGTACCT
SLIM1 enriched binding motif (EBM)	M0680_1.02	[A/C/G/T]AATG[T/A]A[C/T]CT[A/C/G/T]	AT1G17680	1	-1000 bp to TSS	724	731	ATGTACCT
SLIM1 enriched binding motif (EBM)	M0680_1.02	[A/C/G/T]AATG[T/A]A[C/T]CT[A/C/G/T]	AT1G18040	1	-1000 bp to TSS	326	333	ATGTACCT
SLIM1 enriched binding motif (EBM)	M0680_1.02	[A/C/G/T]AATG[T/A]A[C/T]CT[A/C/G/T]	AT1G18170	1	-1000 bp to TSS	344	337	AGGTACAT
SLIM1 enriched binding motif (EBM)	M0680_1.02	[A/C/G/T]AATG[T/A]A[C/T]CT[A/C/G/T]	AT1G18340	1	-1000 bp to TSS	122	129	ATGTACCT
SLIM1 enriched binding motif (EBM)	M0680_1.02	[A/C/G/T]AATG[T/A]A[C/T]CT[A/C/G/T]	AT1G18350	1	-1000 bp to TSS	175	168	AGGTACAT
SLIM1 enriched binding motif (EBM)	M0680_1.02	[A/C/G/T]AATG[T/A]A[C/T]CT[A/C/G/T]	AT1G19140	1	-1000 bp to TSS	519	526	ATGTACCT
SLIM1 enriched binding motif (EBM)	M0680_1.02	[A/C/G/T]AATG[T/A]A[C/T]CT[A/C/G/T]	AT1G19240	1	-1000 bp to TSS	226	219	AGGTACAT
SLIM1 enriched binding motif (EBM)	M0680_1.02	[A/C/G/T]AATG[T/A]A[C/T]CT[A/C/G/T]	AT1G19680	1	-1000 bp to TSS	219	226	ATGTACCT
SLIM1 enriched binding motif (EBM)	M0680_1.02	[A/C/G/T]AATG[T/A]A[C/T]CT[A/C/G/T]	AT1G20080	1	-1000 bp to TSS	299	292	AGGTACAT
SLIM1 enriched binding motif (EBM)	M0680_1.02	[A/C/G/T]AATG[T/A]A[C/T]CT[A/C/G/T]	AT1G21730	1	-1000 bp to TSS	483	490	ATGTACCT
SLIM1 enriched binding motif (EBM)	M0680_1.02	[A/C/G/T]AATG[T/A]A[C/T]CT[A/C/G/T]	AT1G22090	1	-1000 bp to TSS	519	526	ATGTACCT
SLIM1 enriched binding motif (EBM)	M0680_1.02	[A/C/G/T]AATG[T/A]A[C/T]CT[A/C/G/T]	AT1G22340	1	-1000 bp to TSS	386	379	AGGTACAT
SLIM1 enriched binding motif (EBM)	M0680_1.02	[A/C/G/T]AATG[T/A]A[C/T]CT[A/C/G/T]	AT1G22610	1	-1000 bp to TSS	301	308	ATGTACCT
SLIM1 enriched binding motif (EBM)	M0680_1.02	[A/C/G/T]AATG[T/A]A[C/T]CT[A/C/G/T]	AT1G23050	1	-1000 bp to TSS	233	240	ATGTACCT
SLIM1 enriched binding motif (EBM)	M0680_1.02	[A/C/G/T]AATG[T/A]A[C/T]CT[A/C/G/T]	AT1G23160	1	-1000 bp to TSS	517	524	ATGTACCT
SLIM1 enriched binding motif (EBM)	M0680_1.02	[A/C/G/T]AATG[T/A]A[C/T]CT[A/C/G/T]	AT1G23320	1	-1000 bp to TSS	230	223	AGGTACAT
SLIM1 enriched binding motif (EBM)	M0680_1.02	[A/C/G/T]AATG[T/A]A[C/T]CT[A/C/G/T]	AT1G23340	1	-1000 bp to TSS	718	725	ATGTACCT
SLIM1 enriched binding motif (EBM)	M0680_1.02	[A/C/G/T]AATG[T/A]A[C/T]CT[A/C/G/T]	AT1G23510	1	-1000 bp to TSS	857	864	ATGTACCT
SLIM1 enriched binding motif (EBM)	M0680_1.02	[A/C/G/T]AATG[T/A]A[C/T]CT[A/C/G/T]	AT1G24010	1	-1000 bp to TSS	494	487	AGGTACAT
SLIM1 enriched binding motif (EBM)	M0680_1.02	[A/C/G/T]AATG[T/A]A[C/T]CT[A/C/G/T]	AT1G24460	1	-1000 bp to TSS	168	161	AGGTACAT
SLIM1 enriched binding motif (EBM)	M0680_1.02	[A/C/G/T]AATG[T/A]A[C/T]CT[A/C/G/T]	AT1G26800	1	-1000 bp to TSS	595	588	AGGTACAT
SLIM1 enriched binding motif (EBM)	M0680_1.02	[A/C/G/T]AATG[T/A]A[C/T]CT[A/C/G/T]	AT1G27435	1	-1000 bp to TSS	766	759	AGGTACAT
SLIM1 enriched binding motif (EBM)	M0680_1.02	[A/C/G/T]AATG[T/A]A[C/T]CT[A/C/G/T]	AT1G27760	1	-1000 bp to TSS	651	644	AGGTACAT
SLIM1 enriched binding motif (EBM)	M0680_1.02	[A/C/G/T]AATG[T/A]A[C/T]CT[A/C/G/T]	AT1G28040	1	-1000 bp to TSS	852	859	ATGTACCT
SLIM1 enriched binding motif (EBM)	M0680_1.02	[A/C/G/T]AATG[T/A]A[C/T]CT[A/C/G/T]	AT1G29050	1	-1000 bp to TSS	401	408	ATGTACCT
SLIM1 enriched binding motif (EBM)	M0680_1.02	[A/C/G/T]AATG[T/A]A[C/T]CT[A/C/G/T]	AT1G29260	1	-1000 bp to TSS	369	376	ATGTACCT
SLIM1 enriched binding motif (EBM)	M0680_1.02	[A/C/G/T]AATG[T/A]A[C/T]CT[A/C/G/T]	AT1G29265	1	-1000 bp to TSS	133	140	ATGTACCT
SLIM1 enriched binding motif (EBM)	M0680_1.02	[A/C/G/T]AATG[T/A]A[C/T]CT[A/C/G/T]	AT1G29280	1	-1000 bp to TSS	603	610	ATGTACCT
SLIM1 enriched binding motif (EBM)	M0680_1.02	[A/C/G/T]AATG[T/A]A[C/T]CT[A/C/G/T]	AT1G29590	1	-1000 bp to TSS	665	672	ATGTACCT
SLIM1 enriched binding motif (EBM)	M0680_1.02	[A/C/G/T]AATG[T/A]A[C/T]CT[A/C/G/T]	AT1G30290	1	-1000 bp to TSS	554	561	ATGTACCT
SLIM1 enriched binding motif (EBM)	M0680_1.02	[A/C/G/T]AATG[T/A]A[C/T]CT[A/C/G/T]	AT1G30784	1	-1000 bp to TSS	228	235	ATGTACCT
SLIM1 enriched binding motif (EBM)	M0680_1.02	[A/C/G/T]AATG[T/A]A[C/T]CT[A/C/G/T]	AT1G32750	1	-1000 bp to TSS	11	4	AGGTACAT
SLIM1 enriched binding motif (EBM)	M0680_1.02	[A/C/G/T]AATG[T/A]A[C/T]CT[A/C/G/T]	AT1G32760	1	-1000 bp to TSS	676	683	ATGTACCT
SLIM1 enriched binding motif (EBM)	M0680_1.02	[A/C/G/T]AATG[T/A]A[C/T]CT[A/C/G/T]	AT1G34540	1	-1000 bp to TSS	162	155	AGGTACAT
SLIM1 enriched binding motif (EBM)	M0680_1.02	[A/C/G/T]AATG[T/A]A[C/T]CT[A/C/G/T]	AT1G34780	1	-1000 bp to TSS	451	444	AGGTACAT
SLIM1 enriched binding motif (EBM)	M0680_1.02	[A/C/G/T]AATG[T/A]A[C/T]CT[A/C/G/T]	AT1G34844	1	-1000 bp to TSS	901	908	ATGTACCT
SLIM1 enriched binding motif (EBM)	M0680_1.02	[A/C/G/T]AATG[T/A]A[C/T]CT[A/C/G/T]	AT1G35290	1	-1000 bp to TSS	787	794	ATGTACCT
SLIM1 enriched binding motif (EBM)	M0680_1.02	[A/C/G/T]AATG[T/A]A[C/T]CT[A/C/G/T]	AT1G35310	1	-1000 bp to TSS	631	638	ATGTACCT
SLIM1 enriched binding motif (EBM)	M0680_1.02	[A/C/G/T]AATG[T/A]A[C/T]CT[A/C/G/T]	AT1G35350	1	-1000 bp to TSS	162	155	AGGTACAT
SLIM1 enriched binding motif (EBM)	M0680_1.02	[A/C/G/T]AATG[T/A]A[C/T]CT[A/C/G/T]	AT1G44740	1	-1000 bp to TSS	69	76	ATGTACCT
SLIM1 enriched binding motif (EBM)	M0680_1.02	[A/C/G/T]AATG[T/A]A[C/T]CT[A/C/G/T]	AT1G45231	1	-1000 bp to TSS	768	761	AGGTACAT
SLIM1 enriched binding motif (EBM)	M0680_1.02	[A/C/G/T]AATG[T/A]A[C/T]CT[A/C/G/T]	AT1G45234	1	-1000 bp to TSS	68	61	AGGTACAT
SLIM1 enriched binding motif (EBM)	M0680_1.02	[A/C/G/T]AATG[T/A]A[C/T]CT[A/C/G/T]	AT1G47400	1	-1000 bp to TSS	600	593	AGGTACAT
SLIM1 enriched binding motif (EBM)	M0680_1.02	[A/C/G/T]AATG[T/A]A[C/T]CT[A/C/G/T]	AT1G47990	1	-1000 bp to TSS	520	527	ATGTACCT
SLIM1 enriched binding motif (EBM)	M0680_1.02	[A/C/G/T]AATG[T/A]A[C/T]CT[A/C/G/T]	AT1G48970	1	-1000 bp to TSS	479	486	ATGTACCT
SLIM1 enriched binding motif (EBM)	M0680_1.02	[A/C/G/T]AATG[T/A]A[C/T]CT[A/C/G/T]	AT1G49060	1	-1000 bp to TSS	120	127	ATGTACCT
SLIM1 enriched binding motif (EBM)	M0680_1.02	[A/C/G/T]AATG[T/A]A[C/T]CT[A/C/G/T]	AT1G49225	1	-1000 bp to TSS	97	104	ATGTACCT
SLIM1 enriched binding motif (EBM)	M0680_1.02	[A/C/G/T]AATG[T/A]A[C/T]CT[A/C/G/T]	AT1G49260	1	-1000 bp to TSS	354	347	AGGTACAT
SLIM1 enriched binding motif (EBM)	M0680_1.02	[A/C/G/T]AATG[T/A]A[C/T]CT[A/C/G/T]	AT1G49790	1	-1000 bp to TSS	953	960	ATGTACCT
SLIM1 enriched binding motif (EBM)	M0680_1.02	[A/C/G/T]AATG[T/A]A[C/T]CT[A/C/G/T]	AT1G49800	1	-1000 bp to TSS	406	413	ATGTACCT
SLIM1 enriched binding motif (EBM)	M0680_1.02	[A/C/G/T]AATG[T/A]A[C/T]CT[A/C/G/T]	AT1G49870	1	-1000 bp to TSS	768	775	ATGTACCT
SLIM1 enriched binding motif (EBM)	M0680_1.02	[A/C/G/T]AATG[T/A]A[C/T]CT[A/C/G/T]	AT1G49930	1	-1000 bp to TSS	412	419	ATGTACCT
SLIM1 enriched binding motif (EBM)	M0680_1.02	[A/C/G/T]AATG[T/A]A[C/T]CT[A/C/G/T]	AT1G50620	1	-1000 bp to TSS	122	115	AGGTACAT
SLIM1 enriched binding motif (EBM)	M0680_1.02	[A/C/G/T]AATG[T/A]A[C/T]CT[A/C/G/T]	AT1G50732	1	-1000 bp to TSS	504	497	AGGTACAT
SLIM1 enriched binding motif (EBM)	M0680_1.02	[A/C/G/T]AATG[T/A]A[C/T]CT[A/C/G/T]	AT1G50750	1	-1000 bp to TSS	21	28	ATGTACCT
SLIM1 enriched binding motif (EBM)	M0680_1.02	[A/C/G/T]AATG[T/A]A[C/T]CT[A/C/G/T]	AT1G51140	1	-1000 bp to TSS	319	312	AGGTACAT
SLIM1 enriched binding motif (EBM)	M0680_1.02	[A/C/G/T]AATG[T/A]A[C/T]CT[A/C/G/T]	AT1G51402	1	-1000 bp to TSS	643	636	AGGTACAT
SLIM1 enriched binding motif (EBM)	M0680_1.02	[A/C/G/T]AATG[T/A]A[C/T]CT[A/C/G/T]	AT1G51805	1	-1000 bp to TSS	595	588	AGGTACAT
SLIM1 enriched binding motif (EBM)	M0680_1.02	[A/C/G/T]AATG[T/A]A[C/T]CT[A/C/G/T]	AT1G51990	1	-1000 bp to TSS	208	215	ATGTACCT
SLIM1 enriched binding motif (EBM)	M0680_1.02	[A/C/G/T]AATG[T/A]A[C/T]CT[A/C/G/T]	AT1G52600	1	-1000 bp to TSS	136	143	ATGTACCT
SLIM1 enriched binding motif (EBM)	M0680_1.02	[A/C/G/T]AATG[T/A]A[C/T]CT[A/C/G/T]	AT1G52690	1	-1000 bp to TSS	176	183	ATGTACCT
SLIM1 enriched binding motif (EBM)	M0680_1.02	[A/C/G/T]AATG[T/A]A[C/T]CT[A/C/G/T]	AT1G52820	1	-1000 bp to TSS	569	576	ATGTACCT
SLIM1 enriched binding motif (EBM)	M0680_1.02	[A/C/G/T]AATG[T/A]A[C/T]CT[A/C/G/T]	AT1G52827	1	-1000 bp to TSS	133	140	ATGTACCT
SLIM1 enriched binding motif (EBM)	M0680_1.02	[A/C/G/T]AATG[T/A]A[C/T]CT[A/C/G/T]	AT1G52830	1	-1000 bp to TSS	571	578	ATGTACCT
SLIM1 enriched binding motif (EBM)	M0680_1.02	[A/C/G/T]AATG[T/A]A[C/T]CT[A/C/G/T]	AT1G53163	1	-1000 bp to TSS	785	792	ATGTACCT
SLIM1 enriched binding motif (EBM)	M0680_1.02	[A/C/G/T]AATG[T/A]A[C/T]CT[A/C/G/T]	AT1G54150	1	-1000 bp to TSS	453	446	AGGTACAT
SLIM1 enriched binding motif (EBM)	M0680_1.02	[A/C/G/T]AATG[T/A]A[C/T]CT[A/C/G/T]	AT1G54670	1	-1000 bp to TSS	542	535	AGGTACAT
SLIM1 enriched binding motif (EBM)	M0680_1.02	[A/C/G/T]AATG[T/A]A[C/T]CT[A/C/G/T]	AT1G55010	1	-1000 bp to TSS	455	462	ATGTACCT
SLIM1 enriched binding motif (EBM)	M0680_1.02	[A/C/G/T]AATG[T/A]A[C/T]CT[A/C/G/T]	AT1G55290	1	-1000 bp to TSS	173	166	AGGTACAT
SLIM1 enriched binding motif (EBM)	M0680_1.02	[A/C/G/T]AATG[T/A]A[C/T]CT[A/C/G/T]	AT1G55480	1	-1000 bp to TSS	176	169	AGGTACAT
SLIM1 enriched binding motif (EBM)	M0680_1.02	[A/C/G/T]AATG[T/A]A[C/T]CT[A/C/G/T]	AT1G55947	1	-1000 bp to TSS	378	371	AGGTACAT
SLIM1 enriched binding motif (EBM)	M0680_1.02	[A/C/G/T]AATG[T/A]A[C/T]CT[A/C/G/T]	AT1G56080	1	-1000 bp to TSS	259	252	AGGTACAT
SLIM1 enriched binding motif (EBM)	M0680_1.02	[A/C/G/T]AATG[T/A]A[C/T]CT[A/C/G/T]	AT1G56120	1	-1000 bp to TSS	237	244	ATGTACCT
SLIM1 enriched binding motif (EBM)	M0680_1.02	[A/C/G/T]AATG[T/A]A[C/T]CT[A/C/G/T]	AT1G56165	1	-1000 bp to TSS	233	226	AGGTACAT
SLIM1 enriched binding motif (EBM)	M0680_1.02	[A/C/G/T]AATG[T/A]A[C/T]CT[A/C/G/T]	AT1G56180	1	-1000 bp to TSS	369	362	AGGTACAT
SLIM1 enriched binding motif (EBM)	M0680_1.02	[A/C/G/T]AATG[T/A]A[C/T]CT[A/C/G/T]	AT1G56430	1	-1000 bp to TSS	116	109	AGGTACAT
SLIM1 enriched binding motif (EBM)	M0680_1.02	[A/C/G/T]AATG[T/A]A[C/T]CT[A/C/G/T]	AT1G56680	1	-1000 bp to TSS	423	416	AGGTACAT
SLIM1 enriched binding motif (EBM)	M0680_1.02	[A/C/G/T]AATG[T/A]A[C/T]CT[A/C/G/T]	AT1G58230	1	-1000 bp to TSS	662	669	ATGTACCT
SLIM1 enriched binding motif (EBM)	M0680_1.02	[A/C/G/T]AATG[T/A]A[C/T]CT[A/C/G/T]	AT1G58290	1	-1000 bp to TSS	295	288	AGGTACAT
SLIM1 enriched binding motif (EBM)	M0680_1.02	[A/C/G/T]AATG[T/A]A[C/T]CT[A/C/G/T]	AT1G58400	1	-1000 bp to TSS	482	475	AGGTACAT
SLIM1 enriched binding motif (EBM)	M0680_1.02	[A/C/G/T]AATG[T/A]A[C/T]CT[A/C/G/T]	AT1G59910	1	-1000 bp to TSS	59	52	AGGTACAT
SLIM1 enriched binding motif (EBM)	M0680_1.02	[A/C/G/T]AATG[T/A]A[C/T]CT[A/C/G/T]	AT1G60430	1	-1000 bp to TSS	884	891	ATGTACCT
SLIM1 enriched binding motif (EBM)	M0680_1.02	[A/C/G/T]AATG[T/A]A[C/T]CT[A/C/G/T]	AT1G61060	1	-1000 bp to TSS	414	421	ATGTACCT
SLIM1 enriched binding motif (EBM)	M0680_1.02	[A/C/G/T]AATG[T/A]A[C/T]CT[A/C/G/T]	AT1G61700	1	-1000 bp to TSS	127	120	AGGTACAT
SLIM1 enriched binding motif (EBM)	M0680_1.02	[A/C/G/T]AATG[T/A]A[C/T]CT[A/C/G/T]	AT1G61820	1	-1000 bp to TSS	30	23	AGGTACAT
SLIM1 enriched binding motif (EBM)	M0680_1.02	[A/C/G/T]AATG[T/A]A[C/T]CT[A/C/G/T]	AT1G61990	1	-1000 bp to TSS	33	26	AGGTACAT
SLIM1 enriched binding motif (EBM)	M0680_1.02	[A/C/G/T]AATG[T/A]A[C/T]CT[A/C/G/T]	AT1G62560	1	-1000 bp to TSS	274	267	AGGTACAT
SLIM1 enriched binding motif (EBM)	M0680_1.02	[A/C/G/T]AATG[T/A]A[C/T]CT[A/C/G/T]	AT1G63105	1	-1000 bp to TSS	559	552	AGGTACAT
SLIM1 enriched binding motif (EBM)	M0680_1.02	[A/C/G/T]AATG[T/A]A[C/T]CT[A/C/G/T]	AT1G63110	1	-1000 bp to TSS	12	5	AGGTACAT
SLIM1 enriched binding motif (EBM)	M0680_1.02	[A/C/G/T]AATG[T/A]A[C/T]CT[A/C/G/T]	AT1G63210	1	-1000 bp to TSS	566	559	AGGTACAT
SLIM1 enriched binding motif (EBM)	M0680_1.02	[A/C/G/T]AATG[T/A]A[C/T]CT[A/C/G/T]	AT1G64960	1	-1000 bp to TSS	502	495	AGGTACAT
SLIM1 enriched binding motif (EBM)	M0680_1.02	[A/C/G/T]AATG[T/A]A[C/T]CT[A/C/G/T]	AT1G65220	1	-1000 bp to TSS	741	748	ATGTACCT
SLIM1 enriched binding motif (EBM)	M0680_1.02	[A/C/G/T]AATG[T/A]A[C/T]CT[A/C/G/T]	AT1G65520	1	-1000 bp to TSS	437	444	ATGTACCT
SLIM1 enriched binding motif (EBM)	M0680_1.02	[A/C/G/T]AATG[T/A]A[C/T]CT[A/C/G/T]	AT1G65690	1	-1000 bp to TSS	638	645	ATGTACCT
SLIM1 enriched binding motif (EBM)	M0680_1.02	[A/C/G/T]AATG[T/A]A[C/T]CT[A/C/G/T]	AT1G66110	1	-1000 bp to TSS	582	589	ATGTACCT
SLIM1 enriched binding motif (EBM)	M0680_1.02	[A/C/G/T]AATG[T/A]A[C/T]CT[A/C/G/T]	AT1G66390	1	-1000 bp to TSS	121	114	AGGTACAT
SLIM1 enriched binding motif (EBM)	M0680_1.02	[A/C/G/T]AATG[T/A]A[C/T]CT[A/C/G/T]	AT1G66640	1	-1000 bp to TSS	454	447	AGGTACAT
SLIM1 enriched binding motif (EBM)	M0680_1.02	[A/C/G/T]AATG[T/A]A[C/T]CT[A/C/G/T]	AT1G66940	1	-1000 bp to TSS	643	650	ATGTACCT
SLIM1 enriched binding motif (EBM)	M0680_1.02	[A/C/G/T]AATG[T/A]A[C/T]CT[A/C/G/T]	AT1G67470	1	-1000 bp to TSS	207	200	AGGTACAT
SLIM1 enriched binding motif (EBM)	M0680_1.02	[A/C/G/T]AATG[T/A]A[C/T]CT[A/C/G/T]	AT1G67540	1	-1000 bp to TSS	118	125	ATGTACCT
SLIM1 enriched binding motif (EBM)	M0680_1.02	[A/C/G/T]AATG[T/A]A[C/T]CT[A/C/G/T]	AT1G67580	1	-1000 bp to TSS	342	335	AGGTACAT
SLIM1 enriched binding motif (EBM)	M0680_1.02	[A/C/G/T]AATG[T/A]A[C/T]CT[A/C/G/T]	AT1G68585	1	-1000 bp to TSS	75	68	AGGTACAT
SLIM1 enriched binding motif (EBM)	M0680_1.02	[A/C/G/T]AATG[T/A]A[C/T]CT[A/C/G/T]	AT1G69240	1	-1000 bp to TSS	213	206	AGGTACAT
SLIM1 enriched binding motif (EBM)	M0680_1.02	[A/C/G/T]AATG[T/A]A[C/T]CT[A/C/G/T]	AT1G69510	1	-1000 bp to TSS	228	235	ATGTACCT
SLIM1 enriched binding motif (EBM)	M0680_1.02	[A/C/G/T]AATG[T/A]A[C/T]CT[A/C/G/T]	AT1G69523	1	-1000 bp to TSS	785	778	AGGTACAT
SLIM1 enriched binding motif (EBM)	M0680_1.02	[A/C/G/T]AATG[T/A]A[C/T]CT[A/C/G/T]	AT1G69860	1	-1000 bp to TSS	16	23	ATGTACCT
SLIM1 enriched binding motif (EBM)	M0680_1.02	[A/C/G/T]AATG[T/A]A[C/T]CT[A/C/G/T]	AT1G71000	1	-1000 bp to TSS	90	83	AGGTACAT
SLIM1 enriched binding motif (EBM)	M0680_1.02	[A/C/G/T]AATG[T/A]A[C/T]CT[A/C/G/T]	AT1G71430	1	-1000 bp to TSS	81	88	ATGTACCT
SLIM1 enriched binding motif (EBM)	M0680_1.02	[A/C/G/T]AATG[T/A]A[C/T]CT[A/C/G/T]	AT1G71460	1	-1000 bp to TSS	418	425	ATGTACCT
SLIM1 enriched binding motif (EBM)	M0680_1.02	[A/C/G/T]AATG[T/A]A[C/T]CT[A/C/G/T]	AT1G71480	1	-1000 bp to TSS	79	72	AGGTACAT
SLIM1 enriched binding motif (EBM)	M0680_1.02	[A/C/G/T]AATG[T/A]A[C/T]CT[A/C/G/T]	AT1G71990	1	-1000 bp to TSS	530	523	AGGTACAT
SLIM1 enriched binding motif (EBM)	M0680_1.02	[A/C/G/T]AATG[T/A]A[C/T]CT[A/C/G/T]	AT1G72670	1	-1000 bp to TSS	785	792	ATGTACCT
SLIM1 enriched binding motif (EBM)	M0680_1.02	[A/C/G/T]AATG[T/A]A[C/T]CT[A/C/G/T]	AT1G73040	1	-1000 bp to TSS	364	357	AGGTACAT
SLIM1 enriched binding motif (EBM)	M0680_1.02	[A/C/G/T]AATG[T/A]A[C/T]CT[A/C/G/T]	AT1G73110	1	-1000 bp to TSS	828	835	ATGTACCT
SLIM1 enriched binding motif (EBM)	M0680_1.02	[A/C/G/T]AATG[T/A]A[C/T]CT[A/C/G/T]	AT1G73170	1	-1000 bp to TSS	670	677	ATGTACCT
SLIM1 enriched binding motif (EBM)	M0680_1.02	[A/C/G/T]AATG[T/A]A[C/T]CT[A/C/G/T]	AT1G73177	1	-1000 bp to TSS	512	519	ATGTACCT
SLIM1 enriched binding motif (EBM)	M0680_1.02	[A/C/G/T]AATG[T/A]A[C/T]CT[A/C/G/T]	AT1G73370	1	-1000 bp to TSS	438	445	ATGTACCT
SLIM1 enriched binding motif (EBM)	M0680_1.02	[A/C/G/T]AATG[T/A]A[C/T]CT[A/C/G/T]	AT1G73650	1	-1000 bp to TSS	79	72	AGGTACAT
SLIM1 enriched binding motif (EBM)	M0680_1.02	[A/C/G/T]AATG[T/A]A[C/T]CT[A/C/G/T]	AT1G73820	1	-1000 bp to TSS	225	232	ATGTACCT
SLIM1 enriched binding motif (EBM)	M0680_1.02	[A/C/G/T]AATG[T/A]A[C/T]CT[A/C/G/T]	AT1G74000	1	-1000 bp to TSS	537	530	AGGTACAT
SLIM1 enriched binding motif (EBM)	M0680_1.02	[A/C/G/T]AATG[T/A]A[C/T]CT[A/C/G/T]	AT1G74380	1	-1000 bp to TSS	287	280	AGGTACAT
SLIM1 enriched binding motif (EBM)	M0680_1.02	[A/C/G/T]AATG[T/A]A[C/T]CT[A/C/G/T]	AT1G74420	1	-1000 bp to TSS	337	330	AGGTACAT
SLIM1 enriched binding motif (EBM)	M0680_1.02	[A/C/G/T]AATG[T/A]A[C/T]CT[A/C/G/T]	AT1G74500	1	-1000 bp to TSS	244	237	AGGTACAT
SLIM1 enriched binding motif (EBM)	M0680_1.02	[A/C/G/T]AATG[T/A]A[C/T]CT[A/C/G/T]	AT1G74940	1	-1000 bp to TSS	737	730	AGGTACAT
SLIM1 enriched binding motif (EBM)	M0680_1.02	[A/C/G/T]AATG[T/A]A[C/T]CT[A/C/G/T]	AT1G74950	1	-1000 bp to TSS	64	71	ATGTACCT
SLIM1 enriched binding motif (EBM)	M0680_1.02	[A/C/G/T]AATG[T/A]A[C/T]CT[A/C/G/T]	AT1G75310	1	-1000 bp to TSS	624	617	AGGTACAT
SLIM1 enriched binding motif (EBM)	M0680_1.02	[A/C/G/T]AATG[T/A]A[C/T]CT[A/C/G/T]	AT1G75717	1	-1000 bp to TSS	121	128	ATGTACCT
SLIM1 enriched binding motif (EBM)	M0680_1.02	[A/C/G/T]AATG[T/A]A[C/T]CT[A/C/G/T]	AT1G75780	1	-1000 bp to TSS	574	567	AGGTACAT
SLIM1 enriched binding motif (EBM)	M0680_1.02	[A/C/G/T]AATG[T/A]A[C/T]CT[A/C/G/T]	AT1G77810	1	-1000 bp to TSS	562	555	AGGTACAT
SLIM1 enriched binding motif (EBM)	M0680_1.02	[A/C/G/T]AATG[T/A]A[C/T]CT[A/C/G/T]	AT1G77950	1	-1000 bp to TSS	969	976	ATGTACCT
SLIM1 enriched binding motif (EBM)	M0680_1.02	[A/C/G/T]AATG[T/A]A[C/T]CT[A/C/G/T]	AT1G78010	1	-1000 bp to TSS	216	209	AGGTACAT
SLIM1 enriched binding motif (EBM)	M0680_1.02	[A/C/G/T]AATG[T/A]A[C/T]CT[A/C/G/T]	AT1G78200	1	-1000 bp to TSS	399	406	ATGTACCT
SLIM1 enriched binding motif (EBM)	M0680_1.02	[A/C/G/T]AATG[T/A]A[C/T]CT[A/C/G/T]	AT1G78260	1	-1000 bp to TSS	856	863	ATGTACCT
SLIM1 enriched binding motif (EBM)	M0680_1.02	[A/C/G/T]AATG[T/A]A[C/T]CT[A/C/G/T]	AT1G78310	1	-1000 bp to TSS	989	982	AGGTACAT
SLIM1 enriched binding motif (EBM)	M0680_1.02	[A/C/G/T]AATG[T/A]A[C/T]CT[A/C/G/T]	AT1G78450	1	-1000 bp to TSS	100	93	AGGTACAT
SLIM1 enriched binding motif (EBM)	M0680_1.02	[A/C/G/T]AATG[T/A]A[C/T]CT[A/C/G/T]	AT1G78530	1	-1000 bp to TSS	450	443	AGGTACAT
SLIM1 enriched binding motif (EBM)	M0680_1.02	[A/C/G/T]AATG[T/A]A[C/T]CT[A/C/G/T]	AT1G78690	1	-1000 bp to TSS	606	613	ATGTACCT
SLIM1 enriched binding motif (EBM)	M0680_1.02	[A/C/G/T]AATG[T/A]A[C/T]CT[A/C/G/T]	AT1G78770	1	-1000 bp to TSS	660	653	AGGTACAT
SLIM1 enriched binding motif (EBM)	M0680_1.02	[A/C/G/T]AATG[T/A]A[C/T]CT[A/C/G/T]	AT1G78880	1	-1000 bp to TSS	525	518	AGGTACAT
SLIM1 enriched binding motif (EBM)	M0680_1.02	[A/C/G/T]AATG[T/A]A[C/T]CT[A/C/G/T]	AT1G78980	1	-1000 bp to TSS	286	279	AGGTACAT
SLIM1 enriched binding motif (EBM)	M0680_1.02	[A/C/G/T]AATG[T/A]A[C/T]CT[A/C/G/T]	AT1G78995	1	-1000 bp to TSS	81	88	ATGTACCT
SLIM1 enriched binding motif (EBM)	M0680_1.02	[A/C/G/T]AATG[T/A]A[C/T]CT[A/C/G/T]	AT1G79050	1	-1000 bp to TSS	285	278	AGGTACAT
SLIM1 enriched binding motif (EBM)	M0680_1.02	[A/C/G/T]AATG[T/A]A[C/T]CT[A/C/G/T]	AT1G79060	1	-1000 bp to TSS	168	175	ATGTACCT
SLIM1 enriched binding motif (EBM)	M0680_1.02	[A/C/G/T]AATG[T/A]A[C/T]CT[A/C/G/T]	AT1G79470	1	-1000 bp to TSS	807	814	ATGTACCT
SLIM1 enriched binding motif (EBM)	M0680_1.02	[A/C/G/T]AATG[T/A]A[C/T]CT[A/C/G/T]	AT1G80060	1	-1000 bp to TSS	46	53	ATGTACCT
SLIM1 enriched binding motif (EBM)	M0680_1.02	[A/C/G/T]AATG[T/A]A[C/T]CT[A/C/G/T]	AT1G80745	1	-1000 bp to TSS	258	251	AGGTACAT
SLIM1 enriched binding motif (EBM)	M0680_1.02	[A/C/G/T]AATG[T/A]A[C/T]CT[A/C/G/T]	AT1G81001	1	-1000 bp to TSS	83	90	ATGTACCT
SLIM1 enriched binding motif (EBM)	M0680_1.02	[A/C/G/T]AATG[T/A]A[C/T]CT[A/C/G/T]	AT2G00660	1	-1000 bp to TSS	625	632	ATGTACCT
SLIM1 enriched binding motif (EBM)	M0680_1.02	[A/C/G/T]AATG[T/A]A[C/T]CT[A/C/G/T]	AT2G00760	1	-1000 bp to TSS	688	681	AGGTACAT
SLIM1 enriched binding motif (EBM)	M0680_1.02	[A/C/G/T]AATG[T/A]A[C/T]CT[A/C/G/T]	AT2G00830	1	-1000 bp to TSS	376	369	AGGTACAT
SLIM1 enriched binding motif (EBM)	M0680_1.02	[A/C/G/T]AATG[T/A]A[C/T]CT[A/C/G/T]	AT2G01960	1	-1000 bp to TSS	849	842	AGGTACAT
SLIM1 enriched binding motif (EBM)	M0680_1.02	[A/C/G/T]AATG[T/A]A[C/T]CT[A/C/G/T]	AT2G02835	1	-1000 bp to TSS	10	3	AGGTACAT
SLIM1 enriched binding motif (EBM)	M0680_1.02	[A/C/G/T]AATG[T/A]A[C/T]CT[A/C/G/T]	AT2G03510	1	-1000 bp to TSS	677	684	ATGTACCT
SLIM1 enriched binding motif (EBM)	M0680_1.02	[A/C/G/T]AATG[T/A]A[C/T]CT[A/C/G/T]	AT2G03667	1	-1000 bp to TSS	83	76	AGGTACAT
SLIM1 enriched binding motif (EBM)	M0680_1.02	[A/C/G/T]AATG[T/A]A[C/T]CT[A/C/G/T]	AT2G04450	1	-1000 bp to TSS	217	210	AGGTACAT
SLIM1 enriched binding motif (EBM)	M0680_1.02	[A/C/G/T]AATG[T/A]A[C/T]CT[A/C/G/T]	AT2G05165	1	-1000 bp to TSS	125	118	AGGTACAT
SLIM1 enriched binding motif (EBM)	M0680_1.02	[A/C/G/T]AATG[T/A]A[C/T]CT[A/C/G/T]	AT2G05495	1	-1000 bp to TSS	30	23	AGGTACAT
SLIM1 enriched binding motif (EBM)	M0680_1.02	[A/C/G/T]AATG[T/A]A[C/T]CT[A/C/G/T]	AT2G06565	1	-1000 bp to TSS	526	533	ATGTACCT
SLIM1 enriched binding motif (EBM)	M0680_1.02	[A/C/G/T]AATG[T/A]A[C/T]CT[A/C/G/T]	AT2G06990	1	-1000 bp to TSS	664	657	AGGTACAT
SLIM1 enriched binding motif (EBM)	M0680_1.02	[A/C/G/T]AATG[T/A]A[C/T]CT[A/C/G/T]	AT2G07020	1	-1000 bp to TSS	115	122	ATGTACCT
SLIM1 enriched binding motif (EBM)	M0680_1.02	[A/C/G/T]AATG[T/A]A[C/T]CT[A/C/G/T]	AT2G07085	1	-1000 bp to TSS	394	387	AGGTACAT
SLIM1 enriched binding motif (EBM)	M0680_1.02	[A/C/G/T]AATG[T/A]A[C/T]CT[A/C/G/T]	AT2G07180	1	-1000 bp to TSS	255	248	AGGTACAT
SLIM1 enriched binding motif (EBM)	M0680_1.02	[A/C/G/T]AATG[T/A]A[C/T]CT[A/C/G/T]	AT2G07290	1	-1000 bp to TSS	373	366	AGGTACAT
SLIM1 enriched binding motif (EBM)	M0680_1.02	[A/C/G/T]AATG[T/A]A[C/T]CT[A/C/G/T]	AT2G07656	1	-1000 bp to TSS	624	617	AGGTACAT
SLIM1 enriched binding motif (EBM)	M0680_1.02	[A/C/G/T]AATG[T/A]A[C/T]CT[A/C/G/T]	AT2G07673	1	-1000 bp to TSS	159	166	ATGTACCT
SLIM1 enriched binding motif (EBM)	M0680_1.02	[A/C/G/T]AATG[T/A]A[C/T]CT[A/C/G/T]	AT2G07731	1	-1000 bp to TSS	941	948	ATGTACCT
SLIM1 enriched binding motif (EBM)	M0680_1.02	[A/C/G/T]AATG[T/A]A[C/T]CT[A/C/G/T]	AT2G07820	1	-1000 bp to TSS	576	583	ATGTACCT
SLIM1 enriched binding motif (EBM)	M0680_1.02	[A/C/G/T]AATG[T/A]A[C/T]CT[A/C/G/T]	AT2G07855	1	-1000 bp to TSS	687	694	ATGTACCT
SLIM1 enriched binding motif (EBM)	M0680_1.02	[A/C/G/T]AATG[T/A]A[C/T]CT[A/C/G/T]	AT2G08650	1	-1000 bp to TSS	962	969	ATGTACCT
SLIM1 enriched binding motif (EBM)	M0680_1.02	[A/C/G/T]AATG[T/A]A[C/T]CT[A/C/G/T]	AT2G08745	1	-1000 bp to TSS	119	126	ATGTACCT
SLIM1 enriched binding motif (EBM)	M0680_1.02	[A/C/G/T]AATG[T/A]A[C/T]CT[A/C/G/T]	AT2G09345	1	-1000 bp to TSS	576	569	AGGTACAT
SLIM1 enriched binding motif (EBM)	M0680_1.02	[A/C/G/T]AATG[T/A]A[C/T]CT[A/C/G/T]	AT2G09355	1	-1000 bp to TSS	343	350	ATGTACCT
SLIM1 enriched binding motif (EBM)	M0680_1.02	[A/C/G/T]AATG[T/A]A[C/T]CT[A/C/G/T]	AT2G09505	1	-1000 bp to TSS	75	68	AGGTACAT
SLIM1 enriched binding motif (EBM)	M0680_1.02	[A/C/G/T]AATG[T/A]A[C/T]CT[A/C/G/T]	AT2G09510	1	-1000 bp to TSS	580	587	ATGTACCT
SLIM1 enriched binding motif (EBM)	M0680_1.02	[A/C/G/T]AATG[T/A]A[C/T]CT[A/C/G/T]	AT2G10965	1	-1000 bp to TSS	987	980	AGGTACAT
SLIM1 enriched binding motif (EBM)	M0680_1.02	[A/C/G/T]AATG[T/A]A[C/T]CT[A/C/G/T]	AT2G11015	1	-1000 bp to TSS	511	518	ATGTACCT
SLIM1 enriched binding motif (EBM)	M0680_1.02	[A/C/G/T]AATG[T/A]A[C/T]CT[A/C/G/T]	AT2G12935	1	-1000 bp to TSS	810	817	ATGTACCT
SLIM1 enriched binding motif (EBM)	M0680_1.02	[A/C/G/T]AATG[T/A]A[C/T]CT[A/C/G/T]	AT2G13450	1	-1000 bp to TSS	275	268	AGGTACAT
SLIM1 enriched binding motif (EBM)	M0680_1.02	[A/C/G/T]AATG[T/A]A[C/T]CT[A/C/G/T]	AT2G13905	1	-1000 bp to TSS	812	805	AGGTACAT
SLIM1 enriched binding motif (EBM)	M0680_1.02	[A/C/G/T]AATG[T/A]A[C/T]CT[A/C/G/T]	AT2G14700	1	-1000 bp to TSS	376	369	AGGTACAT
SLIM1 enriched binding motif (EBM)	M0680_1.02	[A/C/G/T]AATG[T/A]A[C/T]CT[A/C/G/T]	AT2G14830	1	-1000 bp to TSS	310	303	AGGTACAT
SLIM1 enriched binding motif (EBM)	M0680_1.02	[A/C/G/T]AATG[T/A]A[C/T]CT[A/C/G/T]	AT2G14850	1	-1000 bp to TSS	535	542	ATGTACCT
SLIM1 enriched binding motif (EBM)	M0680_1.02	[A/C/G/T]AATG[T/A]A[C/T]CT[A/C/G/T]	AT2G16090	1	-1000 bp to TSS	708	701	AGGTACAT
SLIM1 enriched binding motif (EBM)	M0680_1.02	[A/C/G/T]AATG[T/A]A[C/T]CT[A/C/G/T]	AT2G16110	1	-1000 bp to TSS	395	402	ATGTACCT
SLIM1 enriched binding motif (EBM)	M0680_1.02	[A/C/G/T]AATG[T/A]A[C/T]CT[A/C/G/T]	AT2G16600	1	-1000 bp to TSS	358	351	AGGTACAT
SLIM1 enriched binding motif (EBM)	M0680_1.02	[A/C/G/T]AATG[T/A]A[C/T]CT[A/C/G/T]	AT2G17850	1	-1000 bp to TSS	714	721	ATGTACCT
SLIM1 enriched binding motif (EBM)	M0680_1.02	[A/C/G/T]AATG[T/A]A[C/T]CT[A/C/G/T]	AT2G17920	1	-1000 bp to TSS	473	466	AGGTACAT
SLIM1 enriched binding motif (EBM)	M0680_1.02	[A/C/G/T]AATG[T/A]A[C/T]CT[A/C/G/T]	AT2G18780	1	-1000 bp to TSS	529	536	ATGTACCT
SLIM1 enriched binding motif (EBM)	M0680_1.02	[A/C/G/T]AATG[T/A]A[C/T]CT[A/C/G/T]	AT2G19290	1	-1000 bp to TSS	648	655	ATGTACCT
SLIM1 enriched binding motif (EBM)	M0680_1.02	[A/C/G/T]AATG[T/A]A[C/T]CT[A/C/G/T]	AT2G19470	1	-1000 bp to TSS	384	391	ATGTACCT
SLIM1 enriched binding motif (EBM)	M0680_1.02	[A/C/G/T]AATG[T/A]A[C/T]CT[A/C/G/T]	AT2G19600	1	-1000 bp to TSS	858	851	AGGTACAT
SLIM1 enriched binding motif (EBM)	M0680_1.02	[A/C/G/T]AATG[T/A]A[C/T]CT[A/C/G/T]	AT2G19750	1	-1000 bp to TSS	86	79	AGGTACAT
SLIM1 enriched binding motif (EBM)	M0680_1.02	[A/C/G/T]AATG[T/A]A[C/T]CT[A/C/G/T]	AT2G20080	1	-1000 bp to TSS	370	363	AGGTACAT
SLIM1 enriched binding motif (EBM)	M0680_1.02	[A/C/G/T]AATG[T/A]A[C/T]CT[A/C/G/T]	AT2G21200	1	-1000 bp to TSS	952	945	AGGTACAT
SLIM1 enriched binding motif (EBM)	M0680_1.02	[A/C/G/T]AATG[T/A]A[C/T]CT[A/C/G/T]	AT2G21630	1	-1000 bp to TSS	554	547	AGGTACAT
SLIM1 enriched binding motif (EBM)	M0680_1.02	[A/C/G/T]AATG[T/A]A[C/T]CT[A/C/G/T]	AT2G22730	1	-1000 bp to TSS	495	488	AGGTACAT
SLIM1 enriched binding motif (EBM)	M0680_1.02	[A/C/G/T]AATG[T/A]A[C/T]CT[A/C/G/T]	AT2G23420	1	-1000 bp to TSS	242	249	ATGTACCT
SLIM1 enriched binding motif (EBM)	M0680_1.02	[A/C/G/T]AATG[T/A]A[C/T]CT[A/C/G/T]	AT2G24430	1	-1000 bp to TSS	550	557	ATGTACCT
SLIM1 enriched binding motif (EBM)	M0680_1.02	[A/C/G/T]AATG[T/A]A[C/T]CT[A/C/G/T]	AT2G24540	1	-1000 bp to TSS	186	179	AGGTACAT
SLIM1 enriched binding motif (EBM)	M0680_1.02	[A/C/G/T]AATG[T/A]A[C/T]CT[A/C/G/T]	AT2G25090	1	-1000 bp to TSS	200	207	ATGTACCT
SLIM1 enriched binding motif (EBM)	M0680_1.02	[A/C/G/T]AATG[T/A]A[C/T]CT[A/C/G/T]	AT2G25850	1	-1000 bp to TSS	168	161	AGGTACAT
SLIM1 enriched binding motif (EBM)	M0680_1.02	[A/C/G/T]AATG[T/A]A[C/T]CT[A/C/G/T]	AT2G26090	1	-1000 bp to TSS	170	177	ATGTACCT
SLIM1 enriched binding motif (EBM)	M0680_1.02	[A/C/G/T]AATG[T/A]A[C/T]CT[A/C/G/T]	AT2G26100	1	-1000 bp to TSS	270	277	ATGTACCT
SLIM1 enriched binding motif (EBM)	M0680_1.02	[A/C/G/T]AATG[T/A]A[C/T]CT[A/C/G/T]	AT2G26860	1	-1000 bp to TSS	847	840	AGGTACAT
SLIM1 enriched binding motif (EBM)	M0680_1.02	[A/C/G/T]AATG[T/A]A[C/T]CT[A/C/G/T]	AT2G27210	1	-1000 bp to TSS	572	565	AGGTACAT
SLIM1 enriched binding motif (EBM)	M0680_1.02	[A/C/G/T]AATG[T/A]A[C/T]CT[A/C/G/T]	AT2G27860	1	-1000 bp to TSS	520	513	AGGTACAT
SLIM1 enriched binding motif (EBM)	M0680_1.02	[A/C/G/T]AATG[T/A]A[C/T]CT[A/C/G/T]	AT2G28105	1	-1000 bp to TSS	613	620	ATGTACCT
SLIM1 enriched binding motif (EBM)	M0680_1.02	[A/C/G/T]AATG[T/A]A[C/T]CT[A/C/G/T]	AT2G28280	1	-1000 bp to TSS	192	199	ATGTACCT
SLIM1 enriched binding motif (EBM)	M0680_1.02	[A/C/G/T]AATG[T/A]A[C/T]CT[A/C/G/T]	AT2G29110	1	-1000 bp to TSS	771	778	ATGTACCT
SLIM1 enriched binding motif (EBM)	M0680_1.02	[A/C/G/T]AATG[T/A]A[C/T]CT[A/C/G/T]	AT2G29830	1	-1000 bp to TSS	503	510	ATGTACCT
SLIM1 enriched binding motif (EBM)	M0680_1.02	[A/C/G/T]AATG[T/A]A[C/T]CT[A/C/G/T]	AT2G30570	1	-1000 bp to TSS	699	706	ATGTACCT
SLIM1 enriched binding motif (EBM)	M0680_1.02	[A/C/G/T]AATG[T/A]A[C/T]CT[A/C/G/T]	AT2G30920	1	-1000 bp to TSS	922	915	AGGTACAT
SLIM1 enriched binding motif (EBM)	M0680_1.02	[A/C/G/T]AATG[T/A]A[C/T]CT[A/C/G/T]	AT2G30925	1	-1000 bp to TSS	151	158	ATGTACCT
SLIM1 enriched binding motif (EBM)	M0680_1.02	[A/C/G/T]AATG[T/A]A[C/T]CT[A/C/G/T]	AT2G32350	1	-1000 bp to TSS	98	91	AGGTACAT
SLIM1 enriched binding motif (EBM)	M0680_1.02	[A/C/G/T]AATG[T/A]A[C/T]CT[A/C/G/T]	AT2G32470	1	-1000 bp to TSS	801	808	ATGTACCT
SLIM1 enriched binding motif (EBM)	M0680_1.02	[A/C/G/T]AATG[T/A]A[C/T]CT[A/C/G/T]	AT2G32670	1	-1000 bp to TSS	555	562	ATGTACCT
SLIM1 enriched binding motif (EBM)	M0680_1.02	[A/C/G/T]AATG[T/A]A[C/T]CT[A/C/G/T]	AT2G32960	1	-1000 bp to TSS	44	51	ATGTACCT
SLIM1 enriched binding motif (EBM)	M0680_1.02	[A/C/G/T]AATG[T/A]A[C/T]CT[A/C/G/T]	AT2G33255	1	-1000 bp to TSS	569	562	AGGTACAT
SLIM1 enriched binding motif (EBM)	M0680_1.02	[A/C/G/T]AATG[T/A]A[C/T]CT[A/C/G/T]	AT2G33385	1	-1000 bp to TSS	882	875	AGGTACAT
SLIM1 enriched binding motif (EBM)	M0680_1.02	[A/C/G/T]AATG[T/A]A[C/T]CT[A/C/G/T]	AT2G33390	1	-1000 bp to TSS	29	36	ATGTACCT
SLIM1 enriched binding motif (EBM)	M0680_1.02	[A/C/G/T]AATG[T/A]A[C/T]CT[A/C/G/T]	AT2G33610	1	-1000 bp to TSS	138	131	AGGTACAT
SLIM1 enriched binding motif (EBM)	M0680_1.02	[A/C/G/T]AATG[T/A]A[C/T]CT[A/C/G/T]	AT2G33655	1	-1000 bp to TSS	462	469	ATGTACCT
SLIM1 enriched binding motif (EBM)	M0680_1.02	[A/C/G/T]AATG[T/A]A[C/T]CT[A/C/G/T]	AT2G33750	1	-1000 bp to TSS	235	242	ATGTACCT
SLIM1 enriched binding motif (EBM)	M0680_1.02	[A/C/G/T]AATG[T/A]A[C/T]CT[A/C/G/T]	AT2G34910	1	-1000 bp to TSS	905	912	ATGTACCT
SLIM1 enriched binding motif (EBM)	M0680_1.02	[A/C/G/T]AATG[T/A]A[C/T]CT[A/C/G/T]	AT2G35130	1	-1000 bp to TSS	889	896	ATGTACCT
SLIM1 enriched binding motif (EBM)	M0680_1.02	[A/C/G/T]AATG[T/A]A[C/T]CT[A/C/G/T]	AT2G35490	1	-1000 bp to TSS	153	160	ATGTACCT
SLIM1 enriched binding motif (EBM)	M0680_1.02	[A/C/G/T]AATG[T/A]A[C/T]CT[A/C/G/T]	AT2G35580	1	-1000 bp to TSS	423	430	ATGTACCT
SLIM1 enriched binding motif (EBM)	M0680_1.02	[A/C/G/T]AATG[T/A]A[C/T]CT[A/C/G/T]	AT2G35585	1	-1000 bp to TSS	496	489	AGGTACAT
SLIM1 enriched binding motif (EBM)	M0680_1.02	[A/C/G/T]AATG[T/A]A[C/T]CT[A/C/G/T]	AT2G36130	1	-1000 bp to TSS	804	797	AGGTACAT
SLIM1 enriched binding motif (EBM)	M0680_1.02	[A/C/G/T]AATG[T/A]A[C/T]CT[A/C/G/T]	AT2G36460	1	-1000 bp to TSS	631	638	ATGTACCT
SLIM1 enriched binding motif (EBM)	M0680_1.02	[A/C/G/T]AATG[T/A]A[C/T]CT[A/C/G/T]	AT2G36480	1	-1000 bp to TSS	379	372	AGGTACAT
SLIM1 enriched binding motif (EBM)	M0680_1.02	[A/C/G/T]AATG[T/A]A[C/T]CT[A/C/G/T]	AT2G37435	1	-1000 bp to TSS	25	32	ATGTACCT
SLIM1 enriched binding motif (EBM)	M0680_1.02	[A/C/G/T]AATG[T/A]A[C/T]CT[A/C/G/T]	AT2G38280	1	-1000 bp to TSS	487	494	ATGTACCT
SLIM1 enriched binding motif (EBM)	M0680_1.02	[A/C/G/T]AATG[T/A]A[C/T]CT[A/C/G/T]	AT2G38290	1	-1000 bp to TSS	685	692	ATGTACCT
SLIM1 enriched binding motif (EBM)	M0680_1.02	[A/C/G/T]AATG[T/A]A[C/T]CT[A/C/G/T]	AT2G38830	1	-1000 bp to TSS	422	415	AGGTACAT
SLIM1 enriched binding motif (EBM)	M0680_1.02	[A/C/G/T]AATG[T/A]A[C/T]CT[A/C/G/T]	AT2G39140	1	-1000 bp to TSS	161	168	ATGTACCT
SLIM1 enriched binding motif (EBM)	M0680_1.02	[A/C/G/T]AATG[T/A]A[C/T]CT[A/C/G/T]	AT2G39530	1	-1000 bp to TSS	325	332	ATGTACCT
SLIM1 enriched binding motif (EBM)	M0680_1.02	[A/C/G/T]AATG[T/A]A[C/T]CT[A/C/G/T]	AT2G39540	1	-1000 bp to TSS	413	406	AGGTACAT
SLIM1 enriched binding motif (EBM)	M0680_1.02	[A/C/G/T]AATG[T/A]A[C/T]CT[A/C/G/T]	AT2G40490	1	-1000 bp to TSS	544	537	AGGTACAT
SLIM1 enriched binding motif (EBM)	M0680_1.02	[A/C/G/T]AATG[T/A]A[C/T]CT[A/C/G/T]	AT2G40890	1	-1000 bp to TSS	598	591	AGGTACAT
SLIM1 enriched binding motif (EBM)	M0680_1.02	[A/C/G/T]AATG[T/A]A[C/T]CT[A/C/G/T]	AT2G41178	1	-1000 bp to TSS	505	498	AGGTACAT
SLIM1 enriched binding motif (EBM)	M0680_1.02	[A/C/G/T]AATG[T/A]A[C/T]CT[A/C/G/T]	AT2G41230	1	-1000 bp to TSS	104	111	ATGTACCT
SLIM1 enriched binding motif (EBM)	M0680_1.02	[A/C/G/T]AATG[T/A]A[C/T]CT[A/C/G/T]	AT2G41490	1	-1000 bp to TSS	344	337	AGGTACAT
SLIM1 enriched binding motif (EBM)	M0680_1.02	[A/C/G/T]AATG[T/A]A[C/T]CT[A/C/G/T]	AT2G41620	1	-1000 bp to TSS	170	163	AGGTACAT
SLIM1 enriched binding motif (EBM)	M0680_1.02	[A/C/G/T]AATG[T/A]A[C/T]CT[A/C/G/T]	AT2G41720	1	-1000 bp to TSS	543	550	ATGTACCT
SLIM1 enriched binding motif (EBM)	M0680_1.02	[A/C/G/T]AATG[T/A]A[C/T]CT[A/C/G/T]	AT2G42395	1	-1000 bp to TSS	872	865	AGGTACAT
SLIM1 enriched binding motif (EBM)	M0680_1.02	[A/C/G/T]AATG[T/A]A[C/T]CT[A/C/G/T]	AT2G43137	1	-1000 bp to TSS	667	660	AGGTACAT
SLIM1 enriched binding motif (EBM)	M0680_1.02	[A/C/G/T]AATG[T/A]A[C/T]CT[A/C/G/T]	AT2G43138	1	-1000 bp to TSS	510	503	AGGTACAT
SLIM1 enriched binding motif (EBM)	M0680_1.02	[A/C/G/T]AATG[T/A]A[C/T]CT[A/C/G/T]	AT2G43139	1	-1000 bp to TSS	349	342	AGGTACAT
SLIM1 enriched binding motif (EBM)	M0680_1.02	[A/C/G/T]AATG[T/A]A[C/T]CT[A/C/G/T]	AT2G43141	1	-1000 bp to TSS	185	178	AGGTACAT
SLIM1 enriched binding motif (EBM)	M0680_1.02	[A/C/G/T]AATG[T/A]A[C/T]CT[A/C/G/T]	AT2G43860	1	-1000 bp to TSS	935	942	ATGTACCT
SLIM1 enriched binding motif (EBM)	M0680_1.02	[A/C/G/T]AATG[T/A]A[C/T]CT[A/C/G/T]	AT2G43945	1	-1000 bp to TSS	878	871	AGGTACAT
SLIM1 enriched binding motif (EBM)	M0680_1.02	[A/C/G/T]AATG[T/A]A[C/T]CT[A/C/G/T]	AT2G44745	1	-1000 bp to TSS	234	241	ATGTACCT
SLIM1 enriched binding motif (EBM)	M0680_1.02	[A/C/G/T]AATG[T/A]A[C/T]CT[A/C/G/T]	AT2G46510	1	-1000 bp to TSS	688	681	AGGTACAT
SLIM1 enriched binding motif (EBM)	M0680_1.02	[A/C/G/T]AATG[T/A]A[C/T]CT[A/C/G/T]	AT2G46580	1	-1000 bp to TSS	140	133	AGGTACAT
SLIM1 enriched binding motif (EBM)	M0680_1.02	[A/C/G/T]AATG[T/A]A[C/T]CT[A/C/G/T]	AT2G47250	1	-1000 bp to TSS	269	262	AGGTACAT
SLIM1 enriched binding motif (EBM)	M0680_1.02	[A/C/G/T]AATG[T/A]A[C/T]CT[A/C/G/T]	AT2G47480	1	-1000 bp to TSS	677	670	AGGTACAT
SLIM1 enriched binding motif (EBM)	M0680_1.02	[A/C/G/T]AATG[T/A]A[C/T]CT[A/C/G/T]	AT2G47485	1	-1000 bp to TSS	226	233	ATGTACCT
SLIM1 enriched binding motif (EBM)	M0680_1.02	[A/C/G/T]AATG[T/A]A[C/T]CT[A/C/G/T]	AT2G47650	1	-1000 bp to TSS	535	528	AGGTACAT
SLIM1 enriched binding motif (EBM)	M0680_1.02	[A/C/G/T]AATG[T/A]A[C/T]CT[A/C/G/T]	AT2G47710	1	-1000 bp to TSS	371	378	ATGTACCT
SLIM1 enriched binding motif (EBM)	M0680_1.02	[A/C/G/T]AATG[T/A]A[C/T]CT[A/C/G/T]	AT3G00760	1	-1000 bp to TSS	446	453	ATGTACCT
SLIM1 enriched binding motif (EBM)	M0680_1.02	[A/C/G/T]AATG[T/A]A[C/T]CT[A/C/G/T]	AT3G00800	1	-1000 bp to TSS	128	135	ATGTACCT
SLIM1 enriched binding motif (EBM)	M0680_1.02	[A/C/G/T]AATG[T/A]A[C/T]CT[A/C/G/T]	AT3G01185	1	-1000 bp to TSS	241	248	ATGTACCT
SLIM1 enriched binding motif (EBM)	M0680_1.02	[A/C/G/T]AATG[T/A]A[C/T]CT[A/C/G/T]	AT3G01385	1	-1000 bp to TSS	963	956	AGGTACAT
SLIM1 enriched binding motif (EBM)	M0680_1.02	[A/C/G/T]AATG[T/A]A[C/T]CT[A/C/G/T]	AT3G01625	1	-1000 bp to TSS	680	687	ATGTACCT
SLIM1 enriched binding motif (EBM)	M0680_1.02	[A/C/G/T]AATG[T/A]A[C/T]CT[A/C/G/T]	AT3G02130	1	-1000 bp to TSS	865	872	ATGTACCT
SLIM1 enriched binding motif (EBM)	M0680_1.02	[A/C/G/T]AATG[T/A]A[C/T]CT[A/C/G/T]	AT3G02180	1	-1000 bp to TSS	233	240	ATGTACCT
SLIM1 enriched binding motif (EBM)	M0680_1.02	[A/C/G/T]AATG[T/A]A[C/T]CT[A/C/G/T]	AT3G02220	1	-1000 bp to TSS	246	253	ATGTACCT
SLIM1 enriched binding motif (EBM)	M0680_1.02	[A/C/G/T]AATG[T/A]A[C/T]CT[A/C/G/T]	AT3G02230	1	-1000 bp to TSS	109	102	AGGTACAT
SLIM1 enriched binding motif (EBM)	M0680_1.02	[A/C/G/T]AATG[T/A]A[C/T]CT[A/C/G/T]	AT3G02510	1	-1000 bp to TSS	578	585	ATGTACCT
SLIM1 enriched binding motif (EBM)	M0680_1.02	[A/C/G/T]AATG[T/A]A[C/T]CT[A/C/G/T]	AT3G02945	1	-1000 bp to TSS	667	660	AGGTACAT
SLIM1 enriched binding motif (EBM)	M0680_1.02	[A/C/G/T]AATG[T/A]A[C/T]CT[A/C/G/T]	AT3G03310	1	-1000 bp to TSS	273	280	ATGTACCT
SLIM1 enriched binding motif (EBM)	M0680_1.02	[A/C/G/T]AATG[T/A]A[C/T]CT[A/C/G/T]	AT3G03320	1	-1000 bp to TSS	868	861	AGGTACAT
SLIM1 enriched binding motif (EBM)	M0680_1.02	[A/C/G/T]AATG[T/A]A[C/T]CT[A/C/G/T]	AT3G03490	1	-1000 bp to TSS	168	175	ATGTACCT
SLIM1 enriched binding motif (EBM)	M0680_1.02	[A/C/G/T]AATG[T/A]A[C/T]CT[A/C/G/T]	AT3G03755	1	-1000 bp to TSS	609	616	ATGTACCT
SLIM1 enriched binding motif (EBM)	M0680_1.02	[A/C/G/T]AATG[T/A]A[C/T]CT[A/C/G/T]	AT3G03925	1	-1000 bp to TSS	238	231	AGGTACAT
SLIM1 enriched binding motif (EBM)	M0680_1.02	[A/C/G/T]AATG[T/A]A[C/T]CT[A/C/G/T]	AT3G04030	1	-1000 bp to TSS	674	681	ATGTACCT
SLIM1 enriched binding motif (EBM)	M0680_1.02	[A/C/G/T]AATG[T/A]A[C/T]CT[A/C/G/T]	AT3G04150	1	-1000 bp to TSS	288	295	ATGTACCT
SLIM1 enriched binding motif (EBM)	M0680_1.02	[A/C/G/T]AATG[T/A]A[C/T]CT[A/C/G/T]	AT3G04184	1	-1000 bp to TSS	707	700	AGGTACAT
SLIM1 enriched binding motif (EBM)	M0680_1.02	[A/C/G/T]AATG[T/A]A[C/T]CT[A/C/G/T]	AT3G04200	1	-1000 bp to TSS	466	459	AGGTACAT
SLIM1 enriched binding motif (EBM)	M0680_1.02	[A/C/G/T]AATG[T/A]A[C/T]CT[A/C/G/T]	AT3G04340	1	-1000 bp to TSS	335	342	ATGTACCT
SLIM1 enriched binding motif (EBM)	M0680_1.02	[A/C/G/T]AATG[T/A]A[C/T]CT[A/C/G/T]	AT3G04430	1	-1000 bp to TSS	136	143	ATGTACCT
SLIM1 enriched binding motif (EBM)	M0680_1.02	[A/C/G/T]AATG[T/A]A[C/T]CT[A/C/G/T]	AT3G04440	1	-1000 bp to TSS	347	340	AGGTACAT
SLIM1 enriched binding motif (EBM)	M0680_1.02	[A/C/G/T]AATG[T/A]A[C/T]CT[A/C/G/T]	AT3G04735	1	-1000 bp to TSS	871	864	AGGTACAT
SLIM1 enriched binding motif (EBM)	M0680_1.02	[A/C/G/T]AATG[T/A]A[C/T]CT[A/C/G/T]	AT3G04740	1	-1000 bp to TSS	86	93	ATGTACCT
SLIM1 enriched binding motif (EBM)	M0680_1.02	[A/C/G/T]AATG[T/A]A[C/T]CT[A/C/G/T]	AT3G04945	1	-1000 bp to TSS	225	232	ATGTACCT
SLIM1 enriched binding motif (EBM)	M0680_1.02	[A/C/G/T]AATG[T/A]A[C/T]CT[A/C/G/T]	AT3G05152	1	-1000 bp to TSS	288	281	AGGTACAT
SLIM1 enriched binding motif (EBM)	M0680_1.02	[A/C/G/T]AATG[T/A]A[C/T]CT[A/C/G/T]	AT3G05350	1	-1000 bp to TSS	348	341	AGGTACAT
SLIM1 enriched binding motif (EBM)	M0680_1.02	[A/C/G/T]AATG[T/A]A[C/T]CT[A/C/G/T]	AT3G05780	1	-1000 bp to TSS	20	27	ATGTACCT
SLIM1 enriched binding motif (EBM)	M0680_1.02	[A/C/G/T]AATG[T/A]A[C/T]CT[A/C/G/T]	AT3G05835	1	-1000 bp to TSS	297	290	AGGTACAT
SLIM1 enriched binding motif (EBM)	M0680_1.02	[A/C/G/T]AATG[T/A]A[C/T]CT[A/C/G/T]	AT3G06630	1	-1000 bp to TSS	58	51	AGGTACAT
SLIM1 enriched binding motif (EBM)	M0680_1.02	[A/C/G/T]AATG[T/A]A[C/T]CT[A/C/G/T]	AT3G06975	1	-1000 bp to TSS	262	269	ATGTACCT
SLIM1 enriched binding motif (EBM)	M0680_1.02	[A/C/G/T]AATG[T/A]A[C/T]CT[A/C/G/T]	AT3G07085	1	-1000 bp to TSS	807	814	ATGTACCT
SLIM1 enriched binding motif (EBM)	M0680_1.02	[A/C/G/T]AATG[T/A]A[C/T]CT[A/C/G/T]	AT3G07225	1	-1000 bp to TSS	594	587	AGGTACAT
SLIM1 enriched binding motif (EBM)	M0680_1.02	[A/C/G/T]AATG[T/A]A[C/T]CT[A/C/G/T]	AT3G07273	1	-1000 bp to TSS	313	320	ATGTACCT
SLIM1 enriched binding motif (EBM)	M0680_1.02	[A/C/G/T]AATG[T/A]A[C/T]CT[A/C/G/T]	AT3G07325	1	-1000 bp to TSS	772	779	ATGTACCT
SLIM1 enriched binding motif (EBM)	M0680_1.02	[A/C/G/T]AATG[T/A]A[C/T]CT[A/C/G/T]	AT3G07365	1	-1000 bp to TSS	45	38	AGGTACAT
SLIM1 enriched binding motif (EBM)	M0680_1.02	[A/C/G/T]AATG[T/A]A[C/T]CT[A/C/G/T]	AT3G07375	1	-1000 bp to TSS	368	375	ATGTACCT
SLIM1 enriched binding motif (EBM)	M0680_1.02	[A/C/G/T]AATG[T/A]A[C/T]CT[A/C/G/T]	AT3G07395	1	-1000 bp to TSS	206	213	ATGTACCT
SLIM1 enriched binding motif (EBM)	M0680_1.02	[A/C/G/T]AATG[T/A]A[C/T]CT[A/C/G/T]	AT3G07805	1	-1000 bp to TSS	598	591	AGGTACAT
SLIM1 enriched binding motif (EBM)	M0680_1.02	[A/C/G/T]AATG[T/A]A[C/T]CT[A/C/G/T]	AT3G07890	1	-1000 bp to TSS	639	646	ATGTACCT
SLIM1 enriched binding motif (EBM)	M0680_1.02	[A/C/G/T]AATG[T/A]A[C/T]CT[A/C/G/T]	AT3G07900	1	-1000 bp to TSS	207	200	AGGTACAT
SLIM1 enriched binding motif (EBM)	M0680_1.02	[A/C/G/T]AATG[T/A]A[C/T]CT[A/C/G/T]	AT3G07905	1	-1000 bp to TSS	373	380	ATGTACCT
SLIM1 enriched binding motif (EBM)	M0680_1.02	[A/C/G/T]AATG[T/A]A[C/T]CT[A/C/G/T]	AT3G08125	1	-1000 bp to TSS	265	258	AGGTACAT
SLIM1 enriched binding motif (EBM)	M0680_1.02	[A/C/G/T]AATG[T/A]A[C/T]CT[A/C/G/T]	AT3G08170	1	-1000 bp to TSS	808	815	ATGTACCT
SLIM1 enriched binding motif (EBM)	M0680_1.02	[A/C/G/T]AATG[T/A]A[C/T]CT[A/C/G/T]	AT3G08200	1	-1000 bp to TSS	45	52	ATGTACCT
SLIM1 enriched binding motif (EBM)	M0680_1.02	[A/C/G/T]AATG[T/A]A[C/T]CT[A/C/G/T]	AT3G08645	1	-1000 bp to TSS	334	327	AGGTACAT
SLIM1 enriched binding motif (EBM)	M0680_1.02	[A/C/G/T]AATG[T/A]A[C/T]CT[A/C/G/T]	AT3G08775	1	-1000 bp to TSS	993	1000	ATGTACCT
SLIM1 enriched binding motif (EBM)	M0680_1.02	[A/C/G/T]AATG[T/A]A[C/T]CT[A/C/G/T]	AT3G08795	1	-1000 bp to TSS	463	456	AGGTACAT
SLIM1 enriched binding motif (EBM)	M0680_1.02	[A/C/G/T]AATG[T/A]A[C/T]CT[A/C/G/T]	AT3G09045	1	-1000 bp to TSS	394	387	AGGTACAT
SLIM1 enriched binding motif (EBM)	M0680_1.02	[A/C/G/T]AATG[T/A]A[C/T]CT[A/C/G/T]	AT3G09065	1	-1000 bp to TSS	182	189	ATGTACCT
SLIM1 enriched binding motif (EBM)	M0680_1.02	[A/C/G/T]AATG[T/A]A[C/T]CT[A/C/G/T]	AT3G09340	1	-1000 bp to TSS	738	745	ATGTACCT
SLIM1 enriched binding motif (EBM)	M0680_1.02	[A/C/G/T]AATG[T/A]A[C/T]CT[A/C/G/T]	AT3G09350	1	-1000 bp to TSS	894	887	AGGTACAT
SLIM1 enriched binding motif (EBM)	M0680_1.02	[A/C/G/T]AATG[T/A]A[C/T]CT[A/C/G/T]	AT3G09670	1	-1000 bp to TSS	763	770	ATGTACCT
SLIM1 enriched binding motif (EBM)	M0680_1.02	[A/C/G/T]AATG[T/A]A[C/T]CT[A/C/G/T]	AT3G09810	1	-1000 bp to TSS	435	442	ATGTACCT
SLIM1 enriched binding motif (EBM)	M0680_1.02	[A/C/G/T]AATG[T/A]A[C/T]CT[A/C/G/T]	AT3G11673	1	-1000 bp to TSS	704	711	ATGTACCT
SLIM1 enriched binding motif (EBM)	M0680_1.02	[A/C/G/T]AATG[T/A]A[C/T]CT[A/C/G/T]	AT3G12100	1	-1000 bp to TSS	139	146	ATGTACCT
SLIM1 enriched binding motif (EBM)	M0680_1.02	[A/C/G/T]AATG[T/A]A[C/T]CT[A/C/G/T]	AT3G12130	1	-1000 bp to TSS	461	454	AGGTACAT
SLIM1 enriched binding motif (EBM)	M0680_1.02	[A/C/G/T]AATG[T/A]A[C/T]CT[A/C/G/T]	AT3G12200	1	-1000 bp to TSS	502	495	AGGTACAT
SLIM1 enriched binding motif (EBM)	M0680_1.02	[A/C/G/T]AATG[T/A]A[C/T]CT[A/C/G/T]	AT3G12520	1	-1000 bp to TSS	161	154	AGGTACAT
SLIM1 enriched binding motif (EBM)	M0680_1.02	[A/C/G/T]AATG[T/A]A[C/T]CT[A/C/G/T]	AT3G12760	1	-1000 bp to TSS	520	527	ATGTACCT
SLIM1 enriched binding motif (EBM)	M0680_1.02	[A/C/G/T]AATG[T/A]A[C/T]CT[A/C/G/T]	AT3G13160	1	-1000 bp to TSS	8	1	AGGTACAT
SLIM1 enriched binding motif (EBM)	M0680_1.02	[A/C/G/T]AATG[T/A]A[C/T]CT[A/C/G/T]	AT3G14460	1	-1000 bp to TSS	234	227	AGGTACAT
SLIM1 enriched binding motif (EBM)	M0680_1.02	[A/C/G/T]AATG[T/A]A[C/T]CT[A/C/G/T]	AT3G14470	1	-1000 bp to TSS	754	761	ATGTACCT
SLIM1 enriched binding motif (EBM)	M0680_1.02	[A/C/G/T]AATG[T/A]A[C/T]CT[A/C/G/T]	AT3G15470	1	-1000 bp to TSS	564	571	ATGTACCT
SLIM1 enriched binding motif (EBM)	M0680_1.02	[A/C/G/T]AATG[T/A]A[C/T]CT[A/C/G/T]	AT3G16510	1	-1000 bp to TSS	350	357	ATGTACCT
SLIM1 enriched binding motif (EBM)	M0680_1.02	[A/C/G/T]AATG[T/A]A[C/T]CT[A/C/G/T]	AT3G17120	1	-1000 bp to TSS	269	262	AGGTACAT
SLIM1 enriched binding motif (EBM)	M0680_1.02	[A/C/G/T]AATG[T/A]A[C/T]CT[A/C/G/T]	AT3G17261	1	-1000 bp to TSS	245	252	ATGTACCT
SLIM1 enriched binding motif (EBM)	M0680_1.02	[A/C/G/T]AATG[T/A]A[C/T]CT[A/C/G/T]	AT3G17715	1	-1000 bp to TSS	703	696	AGGTACAT
SLIM1 enriched binding motif (EBM)	M0680_1.02	[A/C/G/T]AATG[T/A]A[C/T]CT[A/C/G/T]	AT3G17717	1	-1000 bp to TSS	214	207	AGGTACAT
SLIM1 enriched binding motif (EBM)	M0680_1.02	[A/C/G/T]AATG[T/A]A[C/T]CT[A/C/G/T]	AT3G18810	1	-1000 bp to TSS	931	924	AGGTACAT
SLIM1 enriched binding motif (EBM)	M0680_1.02	[A/C/G/T]AATG[T/A]A[C/T]CT[A/C/G/T]	AT3G18820	1	-1000 bp to TSS	777	784	ATGTACCT
SLIM1 enriched binding motif (EBM)	M0680_1.02	[A/C/G/T]AATG[T/A]A[C/T]CT[A/C/G/T]	AT3G19070	1	-1000 bp to TSS	304	311	ATGTACCT
SLIM1 enriched binding motif (EBM)	M0680_1.02	[A/C/G/T]AATG[T/A]A[C/T]CT[A/C/G/T]	AT3G19100	1	-1000 bp to TSS	729	722	AGGTACAT
SLIM1 enriched binding motif (EBM)	M0680_1.02	[A/C/G/T]AATG[T/A]A[C/T]CT[A/C/G/T]	AT3G19140	1	-1000 bp to TSS	207	200	AGGTACAT
SLIM1 enriched binding motif (EBM)	M0680_1.02	[A/C/G/T]AATG[T/A]A[C/T]CT[A/C/G/T]	AT3G19820	1	-1000 bp to TSS	274	267	AGGTACAT
SLIM1 enriched binding motif (EBM)	M0680_1.02	[A/C/G/T]AATG[T/A]A[C/T]CT[A/C/G/T]	AT3G20050	1	-1000 bp to TSS	37	30	AGGTACAT
SLIM1 enriched binding motif (EBM)	M0680_1.02	[A/C/G/T]AATG[T/A]A[C/T]CT[A/C/G/T]	AT3G21160	1	-1000 bp to TSS	150	157	ATGTACCT
SLIM1 enriched binding motif (EBM)	M0680_1.02	[A/C/G/T]AATG[T/A]A[C/T]CT[A/C/G/T]	AT3G21170	1	-1000 bp to TSS	419	412	AGGTACAT
SLIM1 enriched binding motif (EBM)	M0680_1.02	[A/C/G/T]AATG[T/A]A[C/T]CT[A/C/G/T]	AT3G21351	1	-1000 bp to TSS	515	508	AGGTACAT
SLIM1 enriched binding motif (EBM)	M0680_1.02	[A/C/G/T]AATG[T/A]A[C/T]CT[A/C/G/T]	AT3G21371	1	-1000 bp to TSS	715	722	ATGTACCT
SLIM1 enriched binding motif (EBM)	M0680_1.02	[A/C/G/T]AATG[T/A]A[C/T]CT[A/C/G/T]	AT3G21380	1	-1000 bp to TSS	238	245	ATGTACCT
SLIM1 enriched binding motif (EBM)	M0680_1.02	[A/C/G/T]AATG[T/A]A[C/T]CT[A/C/G/T]	AT3G22240	1	-1000 bp to TSS	439	446	ATGTACCT
SLIM1 enriched binding motif (EBM)	M0680_1.02	[A/C/G/T]AATG[T/A]A[C/T]CT[A/C/G/T]	AT3G22337	1	-1000 bp to TSS	471	464	AGGTACAT
SLIM1 enriched binding motif (EBM)	M0680_1.02	[A/C/G/T]AATG[T/A]A[C/T]CT[A/C/G/T]	AT3G24290	1	-1000 bp to TSS	427	420	AGGTACAT
SLIM1 enriched binding motif (EBM)	M0680_1.02	[A/C/G/T]AATG[T/A]A[C/T]CT[A/C/G/T]	AT3G24315	1	-1000 bp to TSS	271	264	AGGTACAT
SLIM1 enriched binding motif (EBM)	M0680_1.02	[A/C/G/T]AATG[T/A]A[C/T]CT[A/C/G/T]	AT3G24570	1	-1000 bp to TSS	569	576	ATGTACCT
SLIM1 enriched binding motif (EBM)	M0680_1.02	[A/C/G/T]AATG[T/A]A[C/T]CT[A/C/G/T]	AT3G24580	1	-1000 bp to TSS	947	940	AGGTACAT
SLIM1 enriched binding motif (EBM)	M0680_1.02	[A/C/G/T]AATG[T/A]A[C/T]CT[A/C/G/T]	AT3G24790	1	-1000 bp to TSS	406	399	AGGTACAT
SLIM1 enriched binding motif (EBM)	M0680_1.02	[A/C/G/T]AATG[T/A]A[C/T]CT[A/C/G/T]	AT3G25400	1	-1000 bp to TSS	959	966	ATGTACCT
SLIM1 enriched binding motif (EBM)	M0680_1.02	[A/C/G/T]AATG[T/A]A[C/T]CT[A/C/G/T]	AT3G25680	1	-1000 bp to TSS	303	310	ATGTACCT
SLIM1 enriched binding motif (EBM)	M0680_1.02	[A/C/G/T]AATG[T/A]A[C/T]CT[A/C/G/T]	AT3G26020	1	-1000 bp to TSS	152	159	ATGTACCT
SLIM1 enriched binding motif (EBM)	M0680_1.02	[A/C/G/T]AATG[T/A]A[C/T]CT[A/C/G/T]	AT3G26040	1	-1000 bp to TSS	155	148	AGGTACAT
SLIM1 enriched binding motif (EBM)	M0680_1.02	[A/C/G/T]AATG[T/A]A[C/T]CT[A/C/G/T]	AT3G26650	1	-1000 bp to TSS	585	592	ATGTACCT
SLIM1 enriched binding motif (EBM)	M0680_1.02	[A/C/G/T]AATG[T/A]A[C/T]CT[A/C/G/T]	AT3G27809	1	-1000 bp to TSS	434	441	ATGTACCT
SLIM1 enriched binding motif (EBM)	M0680_1.02	[A/C/G/T]AATG[T/A]A[C/T]CT[A/C/G/T]	AT3G27920	1	-1000 bp to TSS	932	925	AGGTACAT
SLIM1 enriched binding motif (EBM)	M0680_1.02	[A/C/G/T]AATG[T/A]A[C/T]CT[A/C/G/T]	AT3G28243	1	-1000 bp to TSS	295	302	ATGTACCT
SLIM1 enriched binding motif (EBM)	M0680_1.02	[A/C/G/T]AATG[T/A]A[C/T]CT[A/C/G/T]	AT3G28250	1	-1000 bp to TSS	885	878	AGGTACAT
SLIM1 enriched binding motif (EBM)	M0680_1.02	[A/C/G/T]AATG[T/A]A[C/T]CT[A/C/G/T]	AT3G28715	1	-1000 bp to TSS	609	602	AGGTACAT
SLIM1 enriched binding motif (EBM)	M0680_1.02	[A/C/G/T]AATG[T/A]A[C/T]CT[A/C/G/T]	AT3G28830	1	-1000 bp to TSS	617	624	ATGTACCT
SLIM1 enriched binding motif (EBM)	M0680_1.02	[A/C/G/T]AATG[T/A]A[C/T]CT[A/C/G/T]	AT3G29095	1	-1000 bp to TSS	518	511	AGGTACAT
SLIM1 enriched binding motif (EBM)	M0680_1.02	[A/C/G/T]AATG[T/A]A[C/T]CT[A/C/G/T]	AT3G29380	1	-1000 bp to TSS	682	689	ATGTACCT
SLIM1 enriched binding motif (EBM)	M0680_1.02	[A/C/G/T]AATG[T/A]A[C/T]CT[A/C/G/T]	AT3G30290	1	-1000 bp to TSS	584	577	AGGTACAT
SLIM1 enriched binding motif (EBM)	M0680_1.02	[A/C/G/T]AATG[T/A]A[C/T]CT[A/C/G/T]	AT3G30740	1	-1000 bp to TSS	411	418	ATGTACCT
SLIM1 enriched binding motif (EBM)	M0680_1.02	[A/C/G/T]AATG[T/A]A[C/T]CT[A/C/G/T]	AT3G36659	1	-1000 bp to TSS	662	655	AGGTACAT
SLIM1 enriched binding motif (EBM)	M0680_1.02	[A/C/G/T]AATG[T/A]A[C/T]CT[A/C/G/T]	AT3G42660	1	-1000 bp to TSS	399	392	AGGTACAT
SLIM1 enriched binding motif (EBM)	M0680_1.02	[A/C/G/T]AATG[T/A]A[C/T]CT[A/C/G/T]	AT3G43826	1	-1000 bp to TSS	690	683	AGGTACAT
SLIM1 enriched binding motif (EBM)	M0680_1.02	[A/C/G/T]AATG[T/A]A[C/T]CT[A/C/G/T]	AT3G44150	1	-1000 bp to TSS	698	705	ATGTACCT
SLIM1 enriched binding motif (EBM)	M0680_1.02	[A/C/G/T]AATG[T/A]A[C/T]CT[A/C/G/T]	AT3G44980	1	-1000 bp to TSS	717	724	ATGTACCT
SLIM1 enriched binding motif (EBM)	M0680_1.02	[A/C/G/T]AATG[T/A]A[C/T]CT[A/C/G/T]	AT3G45090	1	-1000 bp to TSS	674	667	AGGTACAT
SLIM1 enriched binding motif (EBM)	M0680_1.02	[A/C/G/T]AATG[T/A]A[C/T]CT[A/C/G/T]	AT3G45310	1	-1000 bp to TSS	806	813	ATGTACCT
SLIM1 enriched binding motif (EBM)	M0680_1.02	[A/C/G/T]AATG[T/A]A[C/T]CT[A/C/G/T]	AT3G45320	1	-1000 bp to TSS	131	124	AGGTACAT
SLIM1 enriched binding motif (EBM)	M0680_1.02	[A/C/G/T]AATG[T/A]A[C/T]CT[A/C/G/T]	AT3G45460	1	-1000 bp to TSS	345	338	AGGTACAT
SLIM1 enriched binding motif (EBM)	M0680_1.02	[A/C/G/T]AATG[T/A]A[C/T]CT[A/C/G/T]	AT3G45890	1	-1000 bp to TSS	188	181	AGGTACAT
SLIM1 enriched binding motif (EBM)	M0680_1.02	[A/C/G/T]AATG[T/A]A[C/T]CT[A/C/G/T]	AT3G46090	1	-1000 bp to TSS	116	109	AGGTACAT
SLIM1 enriched binding motif (EBM)	M0680_1.02	[A/C/G/T]AATG[T/A]A[C/T]CT[A/C/G/T]	AT3G46130	1	-1000 bp to TSS	316	323	ATGTACCT
SLIM1 enriched binding motif (EBM)	M0680_1.02	[A/C/G/T]AATG[T/A]A[C/T]CT[A/C/G/T]	AT3G46280	1	-1000 bp to TSS	204	211	ATGTACCT
SLIM1 enriched binding motif (EBM)	M0680_1.02	[A/C/G/T]AATG[T/A]A[C/T]CT[A/C/G/T]	AT3G46310	1	-1000 bp to TSS	575	568	AGGTACAT
SLIM1 enriched binding motif (EBM)	M0680_1.02	[A/C/G/T]AATG[T/A]A[C/T]CT[A/C/G/T]	AT3G48475	1	-1000 bp to TSS	961	968	ATGTACCT
SLIM1 enriched binding motif (EBM)	M0680_1.02	[A/C/G/T]AATG[T/A]A[C/T]CT[A/C/G/T]	AT3G50760	1	-1000 bp to TSS	474	481	ATGTACCT
SLIM1 enriched binding motif (EBM)	M0680_1.02	[A/C/G/T]AATG[T/A]A[C/T]CT[A/C/G/T]	AT3G50810	1	-1000 bp to TSS	745	738	AGGTACAT
SLIM1 enriched binding motif (EBM)	M0680_1.02	[A/C/G/T]AATG[T/A]A[C/T]CT[A/C/G/T]	AT3G51400	1	-1000 bp to TSS	807	800	AGGTACAT
SLIM1 enriched binding motif (EBM)	M0680_1.02	[A/C/G/T]AATG[T/A]A[C/T]CT[A/C/G/T]	AT3G51620	1	-1000 bp to TSS	838	831	AGGTACAT
SLIM1 enriched binding motif (EBM)	M0680_1.02	[A/C/G/T]AATG[T/A]A[C/T]CT[A/C/G/T]	AT3G53680	1	-1000 bp to TSS	482	489	ATGTACCT
SLIM1 enriched binding motif (EBM)	M0680_1.02	[A/C/G/T]AATG[T/A]A[C/T]CT[A/C/G/T]	AT3G53780	1	-1000 bp to TSS	728	721	AGGTACAT
SLIM1 enriched binding motif (EBM)	M0680_1.02	[A/C/G/T]AATG[T/A]A[C/T]CT[A/C/G/T]	AT3G53820	1	-1000 bp to TSS	537	530	AGGTACAT
SLIM1 enriched binding motif (EBM)	M0680_1.02	[A/C/G/T]AATG[T/A]A[C/T]CT[A/C/G/T]	AT3G53890	1	-1000 bp to TSS	472	465	AGGTACAT
SLIM1 enriched binding motif (EBM)	M0680_1.02	[A/C/G/T]AATG[T/A]A[C/T]CT[A/C/G/T]	AT3G54065	1	-1000 bp to TSS	439	446	ATGTACCT
SLIM1 enriched binding motif (EBM)	M0680_1.02	[A/C/G/T]AATG[T/A]A[C/T]CT[A/C/G/T]	AT3G54310	1	-1000 bp to TSS	320	327	ATGTACCT
SLIM1 enriched binding motif (EBM)	M0680_1.02	[A/C/G/T]AATG[T/A]A[C/T]CT[A/C/G/T]	AT3G54320	1	-1000 bp to TSS	138	131	AGGTACAT
SLIM1 enriched binding motif (EBM)	M0680_1.02	[A/C/G/T]AATG[T/A]A[C/T]CT[A/C/G/T]	AT3G54340	1	-1000 bp to TSS	73	80	ATGTACCT
SLIM1 enriched binding motif (EBM)	M0680_1.02	[A/C/G/T]AATG[T/A]A[C/T]CT[A/C/G/T]	AT3G54410	1	-1000 bp to TSS	968	975	ATGTACCT
SLIM1 enriched binding motif (EBM)	M0680_1.02	[A/C/G/T]AATG[T/A]A[C/T]CT[A/C/G/T]	AT3G54520	1	-1000 bp to TSS	36	43	ATGTACCT
SLIM1 enriched binding motif (EBM)	M0680_1.02	[A/C/G/T]AATG[T/A]A[C/T]CT[A/C/G/T]	AT3G54660	1	-1000 bp to TSS	693	686	AGGTACAT
SLIM1 enriched binding motif (EBM)	M0680_1.02	[A/C/G/T]AATG[T/A]A[C/T]CT[A/C/G/T]	AT3G55380	1	-1000 bp to TSS	112	105	AGGTACAT
SLIM1 enriched binding motif (EBM)	M0680_1.02	[A/C/G/T]AATG[T/A]A[C/T]CT[A/C/G/T]	AT3G56340	1	-1000 bp to TSS	424	431	ATGTACCT
SLIM1 enriched binding motif (EBM)	M0680_1.02	[A/C/G/T]AATG[T/A]A[C/T]CT[A/C/G/T]	AT3G56850	1	-1000 bp to TSS	204	211	ATGTACCT
SLIM1 enriched binding motif (EBM)	M0680_1.02	[A/C/G/T]AATG[T/A]A[C/T]CT[A/C/G/T]	AT3G57220	1	-1000 bp to TSS	38	45	ATGTACCT
SLIM1 enriched binding motif (EBM)	M0680_1.02	[A/C/G/T]AATG[T/A]A[C/T]CT[A/C/G/T]	AT3G58230	1	-1000 bp to TSS	275	282	ATGTACCT
SLIM1 enriched binding motif (EBM)	M0680_1.02	[A/C/G/T]AATG[T/A]A[C/T]CT[A/C/G/T]	AT3G59050	1	-1000 bp to TSS	87	80	AGGTACAT
SLIM1 enriched binding motif (EBM)	M0680_1.02	[A/C/G/T]AATG[T/A]A[C/T]CT[A/C/G/T]	AT3G59090	1	-1000 bp to TSS	740	747	ATGTACCT
SLIM1 enriched binding motif (EBM)	M0680_1.02	[A/C/G/T]AATG[T/A]A[C/T]CT[A/C/G/T]	AT3G59140	1	-1000 bp to TSS	310	303	AGGTACAT
SLIM1 enriched binding motif (EBM)	M0680_1.02	[A/C/G/T]AATG[T/A]A[C/T]CT[A/C/G/T]	AT3G60290	1	-1000 bp to TSS	752	759	ATGTACCT
SLIM1 enriched binding motif (EBM)	M0680_1.02	[A/C/G/T]AATG[T/A]A[C/T]CT[A/C/G/T]	AT3G61185	1	-1000 bp to TSS	25	32	ATGTACCT
SLIM1 enriched binding motif (EBM)	M0680_1.02	[A/C/G/T]AATG[T/A]A[C/T]CT[A/C/G/T]	AT3G61300	1	-1000 bp to TSS	794	801	ATGTACCT
SLIM1 enriched binding motif (EBM)	M0680_1.02	[A/C/G/T]AATG[T/A]A[C/T]CT[A/C/G/T]	AT3G61470	1	-1000 bp to TSS	828	821	AGGTACAT
SLIM1 enriched binding motif (EBM)	M0680_1.02	[A/C/G/T]AATG[T/A]A[C/T]CT[A/C/G/T]	AT3G62080	1	-1000 bp to TSS	794	787	AGGTACAT
SLIM1 enriched binding motif (EBM)	M0680_1.02	[A/C/G/T]AATG[T/A]A[C/T]CT[A/C/G/T]	AT3G62090	1	-1000 bp to TSS	337	330	AGGTACAT
SLIM1 enriched binding motif (EBM)	M0680_1.02	[A/C/G/T]AATG[T/A]A[C/T]CT[A/C/G/T]	AT3G62300	1	-1000 bp to TSS	377	370	AGGTACAT
SLIM1 enriched binding motif (EBM)	M0680_1.02	[A/C/G/T]AATG[T/A]A[C/T]CT[A/C/G/T]	AT3G63370	1	-1000 bp to TSS	566	573	ATGTACCT
SLIM1 enriched binding motif (EBM)	M0680_1.02	[A/C/G/T]AATG[T/A]A[C/T]CT[A/C/G/T]	AT3G63445	1	-1000 bp to TSS	96	89	AGGTACAT
SLIM1 enriched binding motif (EBM)	M0680_1.02	[A/C/G/T]AATG[T/A]A[C/T]CT[A/C/G/T]	AT3G66658	1	-1000 bp to TSS	569	576	ATGTACCT
SLIM1 enriched binding motif (EBM)	M0680_1.02	[A/C/G/T]AATG[T/A]A[C/T]CT[A/C/G/T]	AT4G00300	1	-1000 bp to TSS	486	479	AGGTACAT
SLIM1 enriched binding motif (EBM)	M0680_1.02	[A/C/G/T]AATG[T/A]A[C/T]CT[A/C/G/T]	AT4G00820	1	-1000 bp to TSS	927	920	AGGTACAT
SLIM1 enriched binding motif (EBM)	M0680_1.02	[A/C/G/T]AATG[T/A]A[C/T]CT[A/C/G/T]	AT4G00880	1	-1000 bp to TSS	813	806	AGGTACAT
SLIM1 enriched binding motif (EBM)	M0680_1.02	[A/C/G/T]AATG[T/A]A[C/T]CT[A/C/G/T]	AT4G00891	1	-1000 bp to TSS	373	380	ATGTACCT
SLIM1 enriched binding motif (EBM)	M0680_1.02	[A/C/G/T]AATG[T/A]A[C/T]CT[A/C/G/T]	AT4G00930	1	-1000 bp to TSS	609	602	AGGTACAT
SLIM1 enriched binding motif (EBM)	M0680_1.02	[A/C/G/T]AATG[T/A]A[C/T]CT[A/C/G/T]	AT4G01245	1	-1000 bp to TSS	860	853	AGGTACAT
SLIM1 enriched binding motif (EBM)	M0680_1.02	[A/C/G/T]AATG[T/A]A[C/T]CT[A/C/G/T]	AT4G01790	1	-1000 bp to TSS	336	329	AGGTACAT
SLIM1 enriched binding motif (EBM)	M0680_1.02	[A/C/G/T]AATG[T/A]A[C/T]CT[A/C/G/T]	AT4G01910	1	-1000 bp to TSS	761	754	AGGTACAT
SLIM1 enriched binding motif (EBM)	M0680_1.02	[A/C/G/T]AATG[T/A]A[C/T]CT[A/C/G/T]	AT4G01915	1	-1000 bp to TSS	882	889	ATGTACCT
SLIM1 enriched binding motif (EBM)	M0680_1.02	[A/C/G/T]AATG[T/A]A[C/T]CT[A/C/G/T]	AT4G02000	1	-1000 bp to TSS	449	442	AGGTACAT
SLIM1 enriched binding motif (EBM)	M0680_1.02	[A/C/G/T]AATG[T/A]A[C/T]CT[A/C/G/T]	AT4G02180	1	-1000 bp to TSS	817	810	AGGTACAT
SLIM1 enriched binding motif (EBM)	M0680_1.02	[A/C/G/T]AATG[T/A]A[C/T]CT[A/C/G/T]	AT4G03115	1	-1000 bp to TSS	164	171	ATGTACCT
SLIM1 enriched binding motif (EBM)	M0680_1.02	[A/C/G/T]AATG[T/A]A[C/T]CT[A/C/G/T]	AT4G03685	1	-1000 bp to TSS	23	30	ATGTACCT
SLIM1 enriched binding motif (EBM)	M0680_1.02	[A/C/G/T]AATG[T/A]A[C/T]CT[A/C/G/T]	AT4G03765	1	-1000 bp to TSS	949	942	AGGTACAT
SLIM1 enriched binding motif (EBM)	M0680_1.02	[A/C/G/T]AATG[T/A]A[C/T]CT[A/C/G/T]	AT4G04350	1	-1000 bp to TSS	198	191	AGGTACAT
SLIM1 enriched binding motif (EBM)	M0680_1.02	[A/C/G/T]AATG[T/A]A[C/T]CT[A/C/G/T]	AT4G05190	1	-1000 bp to TSS	277	270	AGGTACAT
SLIM1 enriched binding motif (EBM)	M0680_1.02	[A/C/G/T]AATG[T/A]A[C/T]CT[A/C/G/T]	AT4G05685	1	-1000 bp to TSS	202	195	AGGTACAT
SLIM1 enriched binding motif (EBM)	M0680_1.02	[A/C/G/T]AATG[T/A]A[C/T]CT[A/C/G/T]	AT4G05690	1	-1000 bp to TSS	15	22	ATGTACCT
SLIM1 enriched binding motif (EBM)	M0680_1.02	[A/C/G/T]AATG[T/A]A[C/T]CT[A/C/G/T]	AT4G05965	1	-1000 bp to TSS	941	934	AGGTACAT
SLIM1 enriched binding motif (EBM)	M0680_1.02	[A/C/G/T]AATG[T/A]A[C/T]CT[A/C/G/T]	AT4G06490	1	-1000 bp to TSS	507	514	ATGTACCT
SLIM1 enriched binding motif (EBM)	M0680_1.02	[A/C/G/T]AATG[T/A]A[C/T]CT[A/C/G/T]	AT4G06685	1	-1000 bp to TSS	639	646	ATGTACCT
SLIM1 enriched binding motif (EBM)	M0680_1.02	[A/C/G/T]AATG[T/A]A[C/T]CT[A/C/G/T]	AT4G07185	1	-1000 bp to TSS	632	625	AGGTACAT
SLIM1 enriched binding motif (EBM)	M0680_1.02	[A/C/G/T]AATG[T/A]A[C/T]CT[A/C/G/T]	AT4G07735	1	-1000 bp to TSS	660	667	ATGTACCT
SLIM1 enriched binding motif (EBM)	M0680_1.02	[A/C/G/T]AATG[T/A]A[C/T]CT[A/C/G/T]	AT4G07895	1	-1000 bp to TSS	154	161	ATGTACCT
SLIM1 enriched binding motif (EBM)	M0680_1.02	[A/C/G/T]AATG[T/A]A[C/T]CT[A/C/G/T]	AT4G08835	1	-1000 bp to TSS	218	211	AGGTACAT
SLIM1 enriched binding motif (EBM)	M0680_1.02	[A/C/G/T]AATG[T/A]A[C/T]CT[A/C/G/T]	AT4G08867	1	-1000 bp to TSS	786	793	ATGTACCT
SLIM1 enriched binding motif (EBM)	M0680_1.02	[A/C/G/T]AATG[T/A]A[C/T]CT[A/C/G/T]	AT4G08869	1	-1000 bp to TSS	997	990	AGGTACAT
SLIM1 enriched binding motif (EBM)	M0680_1.02	[A/C/G/T]AATG[T/A]A[C/T]CT[A/C/G/T]	AT4G08874	1	-1000 bp to TSS	765	758	AGGTACAT
SLIM1 enriched binding motif (EBM)	M0680_1.02	[A/C/G/T]AATG[T/A]A[C/T]CT[A/C/G/T]	AT4G09153	1	-1000 bp to TSS	336	343	ATGTACCT
SLIM1 enriched binding motif (EBM)	M0680_1.02	[A/C/G/T]AATG[T/A]A[C/T]CT[A/C/G/T]	AT4G09335	1	-1000 bp to TSS	477	470	AGGTACAT
SLIM1 enriched binding motif (EBM)	M0680_1.02	[A/C/G/T]AATG[T/A]A[C/T]CT[A/C/G/T]	AT4G09610	1	-1000 bp to TSS	179	186	ATGTACCT
SLIM1 enriched binding motif (EBM)	M0680_1.02	[A/C/G/T]AATG[T/A]A[C/T]CT[A/C/G/T]	AT4G09925	1	-1000 bp to TSS	175	168	AGGTACAT
SLIM1 enriched binding motif (EBM)	M0680_1.02	[A/C/G/T]AATG[T/A]A[C/T]CT[A/C/G/T]	AT4G10570	1	-1000 bp to TSS	38	45	ATGTACCT
SLIM1 enriched binding motif (EBM)	M0680_1.02	[A/C/G/T]AATG[T/A]A[C/T]CT[A/C/G/T]	AT4G10600	1	-1000 bp to TSS	574	567	AGGTACAT
SLIM1 enriched binding motif (EBM)	M0680_1.02	[A/C/G/T]AATG[T/A]A[C/T]CT[A/C/G/T]	AT4G10613	1	-1000 bp to TSS	177	170	AGGTACAT
SLIM1 enriched binding motif (EBM)	M0680_1.02	[A/C/G/T]AATG[T/A]A[C/T]CT[A/C/G/T]	AT4G10710	1	-1000 bp to TSS	545	552	ATGTACCT
SLIM1 enriched binding motif (EBM)	M0680_1.02	[A/C/G/T]AATG[T/A]A[C/T]CT[A/C/G/T]	AT4G10720	1	-1000 bp to TSS	17	10	AGGTACAT
SLIM1 enriched binding motif (EBM)	M0680_1.02	[A/C/G/T]AATG[T/A]A[C/T]CT[A/C/G/T]	AT4G11000	1	-1000 bp to TSS	811	818	ATGTACCT
SLIM1 enriched binding motif (EBM)	M0680_1.02	[A/C/G/T]AATG[T/A]A[C/T]CT[A/C/G/T]	AT4G12130	1	-1000 bp to TSS	506	513	ATGTACCT
SLIM1 enriched binding motif (EBM)	M0680_1.02	[A/C/G/T]AATG[T/A]A[C/T]CT[A/C/G/T]	AT4G13250	1	-1000 bp to TSS	866	859	AGGTACAT
SLIM1 enriched binding motif (EBM)	M0680_1.02	[A/C/G/T]AATG[T/A]A[C/T]CT[A/C/G/T]	AT4G13690	1	-1000 bp to TSS	954	947	AGGTACAT
SLIM1 enriched binding motif (EBM)	M0680_1.02	[A/C/G/T]AATG[T/A]A[C/T]CT[A/C/G/T]	AT4G13985	1	-1000 bp to TSS	919	912	AGGTACAT
SLIM1 enriched binding motif (EBM)	M0680_1.02	[A/C/G/T]AATG[T/A]A[C/T]CT[A/C/G/T]	AT4G14100	1	-1000 bp to TSS	406	413	ATGTACCT
SLIM1 enriched binding motif (EBM)	M0680_1.02	[A/C/G/T]AATG[T/A]A[C/T]CT[A/C/G/T]	AT4G14342	1	-1000 bp to TSS	753	760	ATGTACCT
SLIM1 enriched binding motif (EBM)	M0680_1.02	[A/C/G/T]AATG[T/A]A[C/T]CT[A/C/G/T]	AT4G14455	1	-1000 bp to TSS	104	111	ATGTACCT
SLIM1 enriched binding motif (EBM)	M0680_1.02	[A/C/G/T]AATG[T/A]A[C/T]CT[A/C/G/T]	AT4G14675	1	-1000 bp to TSS	816	809	AGGTACAT
SLIM1 enriched binding motif (EBM)	M0680_1.02	[A/C/G/T]AATG[T/A]A[C/T]CT[A/C/G/T]	AT4G14790	1	-1000 bp to TSS	366	373	ATGTACCT
SLIM1 enriched binding motif (EBM)	M0680_1.02	[A/C/G/T]AATG[T/A]A[C/T]CT[A/C/G/T]	AT4G15248	1	-1000 bp to TSS	489	482	AGGTACAT
SLIM1 enriched binding motif (EBM)	M0680_1.02	[A/C/G/T]AATG[T/A]A[C/T]CT[A/C/G/T]	AT4G15320	1	-1000 bp to TSS	808	815	ATGTACCT
SLIM1 enriched binding motif (EBM)	M0680_1.02	[A/C/G/T]AATG[T/A]A[C/T]CT[A/C/G/T]	AT4G16555	1	-1000 bp to TSS	687	694	ATGTACCT
SLIM1 enriched binding motif (EBM)	M0680_1.02	[A/C/G/T]AATG[T/A]A[C/T]CT[A/C/G/T]	AT4G17240	1	-1000 bp to TSS	78	71	AGGTACAT
SLIM1 enriched binding motif (EBM)	M0680_1.02	[A/C/G/T]AATG[T/A]A[C/T]CT[A/C/G/T]	AT4G17500	1	-1000 bp to TSS	353	346	AGGTACAT
SLIM1 enriched binding motif (EBM)	M0680_1.02	[A/C/G/T]AATG[T/A]A[C/T]CT[A/C/G/T]	AT4G17585	1	-1000 bp to TSS	473	480	ATGTACCT
SLIM1 enriched binding motif (EBM)	M0680_1.02	[A/C/G/T]AATG[T/A]A[C/T]CT[A/C/G/T]	AT4G17590	1	-1000 bp to TSS	138	145	ATGTACCT
SLIM1 enriched binding motif (EBM)	M0680_1.02	[A/C/G/T]AATG[T/A]A[C/T]CT[A/C/G/T]	AT4G17600	1	-1000 bp to TSS	831	824	AGGTACAT
SLIM1 enriched binding motif (EBM)	M0680_1.02	[A/C/G/T]AATG[T/A]A[C/T]CT[A/C/G/T]	AT4G17660	1	-1000 bp to TSS	74	67	AGGTACAT
SLIM1 enriched binding motif (EBM)	M0680_1.02	[A/C/G/T]AATG[T/A]A[C/T]CT[A/C/G/T]	AT4G17680	1	-1000 bp to TSS	123	130	ATGTACCT
SLIM1 enriched binding motif (EBM)	M0680_1.02	[A/C/G/T]AATG[T/A]A[C/T]CT[A/C/G/T]	AT4G17690	1	-1000 bp to TSS	211	204	AGGTACAT
SLIM1 enriched binding motif (EBM)	M0680_1.02	[A/C/G/T]AATG[T/A]A[C/T]CT[A/C/G/T]	AT4G17970	1	-1000 bp to TSS	165	172	ATGTACCT
SLIM1 enriched binding motif (EBM)	M0680_1.02	[A/C/G/T]AATG[T/A]A[C/T]CT[A/C/G/T]	AT4G18040	1	-1000 bp to TSS	336	329	AGGTACAT
SLIM1 enriched binding motif (EBM)	M0680_1.02	[A/C/G/T]AATG[T/A]A[C/T]CT[A/C/G/T]	AT4G18580	1	-1000 bp to TSS	479	486	ATGTACCT
SLIM1 enriched binding motif (EBM)	M0680_1.02	[A/C/G/T]AATG[T/A]A[C/T]CT[A/C/G/T]	AT4G18593	1	-1000 bp to TSS	127	120	AGGTACAT
SLIM1 enriched binding motif (EBM)	M0680_1.02	[A/C/G/T]AATG[T/A]A[C/T]CT[A/C/G/T]	AT4G18860	1	-1000 bp to TSS	753	746	AGGTACAT
SLIM1 enriched binding motif (EBM)	M0680_1.02	[A/C/G/T]AATG[T/A]A[C/T]CT[A/C/G/T]	AT4G19090	1	-1000 bp to TSS	441	434	AGGTACAT
SLIM1 enriched binding motif (EBM)	M0680_1.02	[A/C/G/T]AATG[T/A]A[C/T]CT[A/C/G/T]	AT4G19540	1	-1000 bp to TSS	524	517	AGGTACAT
SLIM1 enriched binding motif (EBM)	M0680_1.02	[A/C/G/T]AATG[T/A]A[C/T]CT[A/C/G/T]	AT4G20130	1	-1000 bp to TSS	117	110	AGGTACAT
SLIM1 enriched binding motif (EBM)	M0680_1.02	[A/C/G/T]AATG[T/A]A[C/T]CT[A/C/G/T]	AT4G20360	1	-1000 bp to TSS	578	571	AGGTACAT
SLIM1 enriched binding motif (EBM)	M0680_1.02	[A/C/G/T]AATG[T/A]A[C/T]CT[A/C/G/T]	AT4G21320	1	-1000 bp to TSS	322	329	ATGTACCT
SLIM1 enriched binding motif (EBM)	M0680_1.02	[A/C/G/T]AATG[T/A]A[C/T]CT[A/C/G/T]	AT4G21510	1	-1000 bp to TSS	710	703	AGGTACAT
SLIM1 enriched binding motif (EBM)	M0680_1.02	[A/C/G/T]AATG[T/A]A[C/T]CT[A/C/G/T]	AT4G21540	1	-1000 bp to TSS	345	352	ATGTACCT
SLIM1 enriched binding motif (EBM)	M0680_1.02	[A/C/G/T]AATG[T/A]A[C/T]CT[A/C/G/T]	AT4G22010	1	-1000 bp to TSS	105	112	ATGTACCT
SLIM1 enriched binding motif (EBM)	M0680_1.02	[A/C/G/T]AATG[T/A]A[C/T]CT[A/C/G/T]	AT4G22214	1	-1000 bp to TSS	345	352	ATGTACCT
SLIM1 enriched binding motif (EBM)	M0680_1.02	[A/C/G/T]AATG[T/A]A[C/T]CT[A/C/G/T]	AT4G22430	1	-1000 bp to TSS	527	534	ATGTACCT
SLIM1 enriched binding motif (EBM)	M0680_1.02	[A/C/G/T]AATG[T/A]A[C/T]CT[A/C/G/T]	AT4G23000	1	-1000 bp to TSS	358	351	AGGTACAT
SLIM1 enriched binding motif (EBM)	M0680_1.02	[A/C/G/T]AATG[T/A]A[C/T]CT[A/C/G/T]	AT4G23340	1	-1000 bp to TSS	279	272	AGGTACAT
SLIM1 enriched binding motif (EBM)	M0680_1.02	[A/C/G/T]AATG[T/A]A[C/T]CT[A/C/G/T]	AT4G24060	1	-1000 bp to TSS	828	835	ATGTACCT
SLIM1 enriched binding motif (EBM)	M0680_1.02	[A/C/G/T]AATG[T/A]A[C/T]CT[A/C/G/T]	AT4G24175	1	-1000 bp to TSS	436	443	ATGTACCT
SLIM1 enriched binding motif (EBM)	M0680_1.02	[A/C/G/T]AATG[T/A]A[C/T]CT[A/C/G/T]	AT4G25100	1	-1000 bp to TSS	861	854	AGGTACAT
SLIM1 enriched binding motif (EBM)	M0680_1.02	[A/C/G/T]AATG[T/A]A[C/T]CT[A/C/G/T]	AT4G25530	1	-1000 bp to TSS	450	443	AGGTACAT
SLIM1 enriched binding motif (EBM)	M0680_1.02	[A/C/G/T]AATG[T/A]A[C/T]CT[A/C/G/T]	AT4G27852	1	-1000 bp to TSS	38	45	ATGTACCT
SLIM1 enriched binding motif (EBM)	M0680_1.02	[A/C/G/T]AATG[T/A]A[C/T]CT[A/C/G/T]	AT4G27990	1	-1000 bp to TSS	100	107	ATGTACCT
SLIM1 enriched binding motif (EBM)	M0680_1.02	[A/C/G/T]AATG[T/A]A[C/T]CT[A/C/G/T]	AT4G28110	1	-1000 bp to TSS	905	898	AGGTACAT
SLIM1 enriched binding motif (EBM)	M0680_1.02	[A/C/G/T]AATG[T/A]A[C/T]CT[A/C/G/T]	AT4G28230	1	-1000 bp to TSS	300	307	ATGTACCT
SLIM1 enriched binding motif (EBM)	M0680_1.02	[A/C/G/T]AATG[T/A]A[C/T]CT[A/C/G/T]	AT4G28980	1	-1000 bp to TSS	183	190	ATGTACCT
SLIM1 enriched binding motif (EBM)	M0680_1.02	[A/C/G/T]AATG[T/A]A[C/T]CT[A/C/G/T]	AT4G29510	1	-1000 bp to TSS	100	93	AGGTACAT
SLIM1 enriched binding motif (EBM)	M0680_1.02	[A/C/G/T]AATG[T/A]A[C/T]CT[A/C/G/T]	AT4G29690	1	-1000 bp to TSS	134	141	ATGTACCT
SLIM1 enriched binding motif (EBM)	M0680_1.02	[A/C/G/T]AATG[T/A]A[C/T]CT[A/C/G/T]	AT4G29800	1	-1000 bp to TSS	674	667	AGGTACAT
SLIM1 enriched binding motif (EBM)	M0680_1.02	[A/C/G/T]AATG[T/A]A[C/T]CT[A/C/G/T]	AT4G30560	1	-1000 bp to TSS	291	298	ATGTACCT
SLIM1 enriched binding motif (EBM)	M0680_1.02	[A/C/G/T]AATG[T/A]A[C/T]CT[A/C/G/T]	AT4G30630	1	-1000 bp to TSS	311	318	ATGTACCT
SLIM1 enriched binding motif (EBM)	M0680_1.02	[A/C/G/T]AATG[T/A]A[C/T]CT[A/C/G/T]	AT4G30870	1	-1000 bp to TSS	655	662	ATGTACCT
SLIM1 enriched binding motif (EBM)	M0680_1.02	[A/C/G/T]AATG[T/A]A[C/T]CT[A/C/G/T]	AT4G31030	1	-1000 bp to TSS	188	195	ATGTACCT
SLIM1 enriched binding motif (EBM)	M0680_1.02	[A/C/G/T]AATG[T/A]A[C/T]CT[A/C/G/T]	AT4G31350	1	-1000 bp to TSS	467	460	AGGTACAT
SLIM1 enriched binding motif (EBM)	M0680_1.02	[A/C/G/T]AATG[T/A]A[C/T]CT[A/C/G/T]	AT4G32640	1	-1000 bp to TSS	210	203	AGGTACAT
SLIM1 enriched binding motif (EBM)	M0680_1.02	[A/C/G/T]AATG[T/A]A[C/T]CT[A/C/G/T]	AT4G32710	1	-1000 bp to TSS	25	18	AGGTACAT
SLIM1 enriched binding motif (EBM)	M0680_1.02	[A/C/G/T]AATG[T/A]A[C/T]CT[A/C/G/T]	AT4G32800	1	-1000 bp to TSS	329	322	AGGTACAT
SLIM1 enriched binding motif (EBM)	M0680_1.02	[A/C/G/T]AATG[T/A]A[C/T]CT[A/C/G/T]	AT4G32950	1	-1000 bp to TSS	91	98	ATGTACCT
SLIM1 enriched binding motif (EBM)	M0680_1.02	[A/C/G/T]AATG[T/A]A[C/T]CT[A/C/G/T]	AT4G33380	1	-1000 bp to TSS	515	508	AGGTACAT
SLIM1 enriched binding motif (EBM)	M0680_1.02	[A/C/G/T]AATG[T/A]A[C/T]CT[A/C/G/T]	AT4G34410	1	-1000 bp to TSS	33	40	ATGTACCT
SLIM1 enriched binding motif (EBM)	M0680_1.02	[A/C/G/T]AATG[T/A]A[C/T]CT[A/C/G/T]	AT4G34440	1	-1000 bp to TSS	338	331	AGGTACAT
SLIM1 enriched binding motif (EBM)	M0680_1.02	[A/C/G/T]AATG[T/A]A[C/T]CT[A/C/G/T]	AT4G34740	1	-1000 bp to TSS	82	75	AGGTACAT
SLIM1 enriched binding motif (EBM)	M0680_1.02	[A/C/G/T]AATG[T/A]A[C/T]CT[A/C/G/T]	AT4G34850	1	-1000 bp to TSS	266	273	ATGTACCT
SLIM1 enriched binding motif (EBM)	M0680_1.02	[A/C/G/T]AATG[T/A]A[C/T]CT[A/C/G/T]	AT4G35220	1	-1000 bp to TSS	437	430	AGGTACAT
SLIM1 enriched binding motif (EBM)	M0680_1.02	[A/C/G/T]AATG[T/A]A[C/T]CT[A/C/G/T]	AT4G35390	1	-1000 bp to TSS	927	934	ATGTACCT
SLIM1 enriched binding motif (EBM)	M0680_1.02	[A/C/G/T]AATG[T/A]A[C/T]CT[A/C/G/T]	AT4G35420	1	-1000 bp to TSS	207	214	ATGTACCT
SLIM1 enriched binding motif (EBM)	M0680_1.02	[A/C/G/T]AATG[T/A]A[C/T]CT[A/C/G/T]	AT4G35530	1	-1000 bp to TSS	643	650	ATGTACCT
SLIM1 enriched binding motif (EBM)	M0680_1.02	[A/C/G/T]AATG[T/A]A[C/T]CT[A/C/G/T]	AT4G37140	1	-1000 bp to TSS	109	102	AGGTACAT
SLIM1 enriched binding motif (EBM)	M0680_1.02	[A/C/G/T]AATG[T/A]A[C/T]CT[A/C/G/T]	AT4G37450	1	-1000 bp to TSS	671	678	ATGTACCT
SLIM1 enriched binding motif (EBM)	M0680_1.02	[A/C/G/T]AATG[T/A]A[C/T]CT[A/C/G/T]	AT4G38170	1	-1000 bp to TSS	412	419	ATGTACCT
SLIM1 enriched binding motif (EBM)	M0680_1.02	[A/C/G/T]AATG[T/A]A[C/T]CT[A/C/G/T]	AT4G38215	1	-1000 bp to TSS	294	301	ATGTACCT
SLIM1 enriched binding motif (EBM)	M0680_1.02	[A/C/G/T]AATG[T/A]A[C/T]CT[A/C/G/T]	AT4G38225	1	-1000 bp to TSS	551	544	AGGTACAT
SLIM1 enriched binding motif (EBM)	M0680_1.02	[A/C/G/T]AATG[T/A]A[C/T]CT[A/C/G/T]	AT4G38440	1	-1000 bp to TSS	127	120	AGGTACAT
SLIM1 enriched binding motif (EBM)	M0680_1.02	[A/C/G/T]AATG[T/A]A[C/T]CT[A/C/G/T]	AT4G39500	1	-1000 bp to TSS	899	906	ATGTACCT
SLIM1 enriched binding motif (EBM)	M0680_1.02	[A/C/G/T]AATG[T/A]A[C/T]CT[A/C/G/T]	AT4G39672	1	-1000 bp to TSS	524	517	AGGTACAT
SLIM1 enriched binding motif (EBM)	M0680_1.02	[A/C/G/T]AATG[T/A]A[C/T]CT[A/C/G/T]	AT4G39680	1	-1000 bp to TSS	204	197	AGGTACAT
SLIM1 enriched binding motif (EBM)	M0680_1.02	[A/C/G/T]AATG[T/A]A[C/T]CT[A/C/G/T]	AT5G00370	1	-1000 bp to TSS	243	236	AGGTACAT
SLIM1 enriched binding motif (EBM)	M0680_1.02	[A/C/G/T]AATG[T/A]A[C/T]CT[A/C/G/T]	AT5G00520	1	-1000 bp to TSS	50	43	AGGTACAT
SLIM1 enriched binding motif (EBM)	M0680_1.02	[A/C/G/T]AATG[T/A]A[C/T]CT[A/C/G/T]	AT5G00715	1	-1000 bp to TSS	223	230	ATGTACCT
SLIM1 enriched binding motif (EBM)	M0680_1.02	[A/C/G/T]AATG[T/A]A[C/T]CT[A/C/G/T]	AT5G00880	1	-1000 bp to TSS	304	311	ATGTACCT
SLIM1 enriched binding motif (EBM)	M0680_1.02	[A/C/G/T]AATG[T/A]A[C/T]CT[A/C/G/T]	AT5G01295	1	-1000 bp to TSS	179	172	AGGTACAT
SLIM1 enriched binding motif (EBM)	M0680_1.02	[A/C/G/T]AATG[T/A]A[C/T]CT[A/C/G/T]	AT5G01315	1	-1000 bp to TSS	96	103	ATGTACCT
SLIM1 enriched binding motif (EBM)	M0680_1.02	[A/C/G/T]AATG[T/A]A[C/T]CT[A/C/G/T]	AT5G01345	1	-1000 bp to TSS	176	183	ATGTACCT
SLIM1 enriched binding motif (EBM)	M0680_1.02	[A/C/G/T]AATG[T/A]A[C/T]CT[A/C/G/T]	AT5G01925	1	-1000 bp to TSS	607	614	ATGTACCT
SLIM1 enriched binding motif (EBM)	M0680_1.02	[A/C/G/T]AATG[T/A]A[C/T]CT[A/C/G/T]	AT5G01960	1	-1000 bp to TSS	17	10	AGGTACAT
SLIM1 enriched binding motif (EBM)	M0680_1.02	[A/C/G/T]AATG[T/A]A[C/T]CT[A/C/G/T]	AT5G02385	1	-1000 bp to TSS	813	806	AGGTACAT
SLIM1 enriched binding motif (EBM)	M0680_1.02	[A/C/G/T]AATG[T/A]A[C/T]CT[A/C/G/T]	AT5G02425	1	-1000 bp to TSS	135	142	ATGTACCT
SLIM1 enriched binding motif (EBM)	M0680_1.02	[A/C/G/T]AATG[T/A]A[C/T]CT[A/C/G/T]	AT5G02685	1	-1000 bp to TSS	592	599	ATGTACCT
SLIM1 enriched binding motif (EBM)	M0680_1.02	[A/C/G/T]AATG[T/A]A[C/T]CT[A/C/G/T]	AT5G03210	1	-1000 bp to TSS	458	451	AGGTACAT
SLIM1 enriched binding motif (EBM)	M0680_1.02	[A/C/G/T]AATG[T/A]A[C/T]CT[A/C/G/T]	AT5G03645	1	-1000 bp to TSS	809	816	ATGTACCT
SLIM1 enriched binding motif (EBM)	M0680_1.02	[A/C/G/T]AATG[T/A]A[C/T]CT[A/C/G/T]	AT5G03680	1	-1000 bp to TSS	307	300	AGGTACAT
SLIM1 enriched binding motif (EBM)	M0680_1.02	[A/C/G/T]AATG[T/A]A[C/T]CT[A/C/G/T]	AT5G03720	1	-1000 bp to TSS	483	476	AGGTACAT
SLIM1 enriched binding motif (EBM)	M0680_1.02	[A/C/G/T]AATG[T/A]A[C/T]CT[A/C/G/T]	AT5G03835	1	-1000 bp to TSS	771	778	ATGTACCT
SLIM1 enriched binding motif (EBM)	M0680_1.02	[A/C/G/T]AATG[T/A]A[C/T]CT[A/C/G/T]	AT5G04200	1	-1000 bp to TSS	99	92	AGGTACAT
SLIM1 enriched binding motif (EBM)	M0680_1.02	[A/C/G/T]AATG[T/A]A[C/T]CT[A/C/G/T]	AT5G04445	1	-1000 bp to TSS	699	692	AGGTACAT
SLIM1 enriched binding motif (EBM)	M0680_1.02	[A/C/G/T]AATG[T/A]A[C/T]CT[A/C/G/T]	AT5G05095	1	-1000 bp to TSS	817	824	ATGTACCT
SLIM1 enriched binding motif (EBM)	M0680_1.02	[A/C/G/T]AATG[T/A]A[C/T]CT[A/C/G/T]	AT5G05235	1	-1000 bp to TSS	547	540	AGGTACAT
SLIM1 enriched binding motif (EBM)	M0680_1.02	[A/C/G/T]AATG[T/A]A[C/T]CT[A/C/G/T]	AT5G05445	1	-1000 bp to TSS	745	738	AGGTACAT
SLIM1 enriched binding motif (EBM)	M0680_1.02	[A/C/G/T]AATG[T/A]A[C/T]CT[A/C/G/T]	AT5G05670	1	-1000 bp to TSS	111	104	AGGTACAT
SLIM1 enriched binding motif (EBM)	M0680_1.02	[A/C/G/T]AATG[T/A]A[C/T]CT[A/C/G/T]	AT5G05775	1	-1000 bp to TSS	959	952	AGGTACAT
SLIM1 enriched binding motif (EBM)	M0680_1.02	[A/C/G/T]AATG[T/A]A[C/T]CT[A/C/G/T]	AT5G06220	1	-1000 bp to TSS	876	869	AGGTACAT
SLIM1 enriched binding motif (EBM)	M0680_1.02	[A/C/G/T]AATG[T/A]A[C/T]CT[A/C/G/T]	AT5G06335	1	-1000 bp to TSS	963	956	AGGTACAT
SLIM1 enriched binding motif (EBM)	M0680_1.02	[A/C/G/T]AATG[T/A]A[C/T]CT[A/C/G/T]	AT5G06450	1	-1000 bp to TSS	688	695	ATGTACCT
SLIM1 enriched binding motif (EBM)	M0680_1.02	[A/C/G/T]AATG[T/A]A[C/T]CT[A/C/G/T]	AT5G06460	1	-1000 bp to TSS	641	634	AGGTACAT
SLIM1 enriched binding motif (EBM)	M0680_1.02	[A/C/G/T]AATG[T/A]A[C/T]CT[A/C/G/T]	AT5G06620	1	-1000 bp to TSS	426	419	AGGTACAT
SLIM1 enriched binding motif (EBM)	M0680_1.02	[A/C/G/T]AATG[T/A]A[C/T]CT[A/C/G/T]	AT5G06955	1	-1000 bp to TSS	274	267	AGGTACAT
SLIM1 enriched binding motif (EBM)	M0680_1.02	[A/C/G/T]AATG[T/A]A[C/T]CT[A/C/G/T]	AT5G07010	1	-1000 bp to TSS	54	47	AGGTACAT
SLIM1 enriched binding motif (EBM)	M0680_1.02	[A/C/G/T]AATG[T/A]A[C/T]CT[A/C/G/T]	AT5G07365	1	-1000 bp to TSS	402	409	ATGTACCT
SLIM1 enriched binding motif (EBM)	M0680_1.02	[A/C/G/T]AATG[T/A]A[C/T]CT[A/C/G/T]	AT5G07375	1	-1000 bp to TSS	700	707	ATGTACCT
SLIM1 enriched binding motif (EBM)	M0680_1.02	[A/C/G/T]AATG[T/A]A[C/T]CT[A/C/G/T]	AT5G07385	1	-1000 bp to TSS	831	824	AGGTACAT
SLIM1 enriched binding motif (EBM)	M0680_1.02	[A/C/G/T]AATG[T/A]A[C/T]CT[A/C/G/T]	AT5G07571	1	-1000 bp to TSS	690	697	ATGTACCT
SLIM1 enriched binding motif (EBM)	M0680_1.02	[A/C/G/T]AATG[T/A]A[C/T]CT[A/C/G/T]	AT5G07775	1	-1000 bp to TSS	246	239	AGGTACAT
SLIM1 enriched binding motif (EBM)	M0680_1.02	[A/C/G/T]AATG[T/A]A[C/T]CT[A/C/G/T]	AT5G08655	1	-1000 bp to TSS	925	918	AGGTACAT
SLIM1 enriched binding motif (EBM)	M0680_1.02	[A/C/G/T]AATG[T/A]A[C/T]CT[A/C/G/T]	AT5G09500	1	-1000 bp to TSS	929	936	ATGTACCT
SLIM1 enriched binding motif (EBM)	M0680_1.02	[A/C/G/T]AATG[T/A]A[C/T]CT[A/C/G/T]	AT5G09535	1	-1000 bp to TSS	149	142	AGGTACAT
SLIM1 enriched binding motif (EBM)	M0680_1.02	[A/C/G/T]AATG[T/A]A[C/T]CT[A/C/G/T]	AT5G09545	1	-1000 bp to TSS	924	931	ATGTACCT
SLIM1 enriched binding motif (EBM)	M0680_1.02	[A/C/G/T]AATG[T/A]A[C/T]CT[A/C/G/T]	AT5G09565	1	-1000 bp to TSS	192	199	ATGTACCT
SLIM1 enriched binding motif (EBM)	M0680_1.02	[A/C/G/T]AATG[T/A]A[C/T]CT[A/C/G/T]	AT5G10250	1	-1000 bp to TSS	123	116	AGGTACAT
SLIM1 enriched binding motif (EBM)	M0680_1.02	[A/C/G/T]AATG[T/A]A[C/T]CT[A/C/G/T]	AT5G10470	1	-1000 bp to TSS	342	335	AGGTACAT
SLIM1 enriched binding motif (EBM)	M0680_1.02	[A/C/G/T]AATG[T/A]A[C/T]CT[A/C/G/T]	AT5G10740	1	-1000 bp to TSS	879	872	AGGTACAT
SLIM1 enriched binding motif (EBM)	M0680_1.02	[A/C/G/T]AATG[T/A]A[C/T]CT[A/C/G/T]	AT5G10900	1	-1000 bp to TSS	34	41	ATGTACCT
SLIM1 enriched binding motif (EBM)	M0680_1.02	[A/C/G/T]AATG[T/A]A[C/T]CT[A/C/G/T]	AT5G11010	1	-1000 bp to TSS	905	898	AGGTACAT
SLIM1 enriched binding motif (EBM)	M0680_1.02	[A/C/G/T]AATG[T/A]A[C/T]CT[A/C/G/T]	AT5G11880	1	-1000 bp to TSS	446	439	AGGTACAT
SLIM1 enriched binding motif (EBM)	M0680_1.02	[A/C/G/T]AATG[T/A]A[C/T]CT[A/C/G/T]	AT5G11890	1	-1000 bp to TSS	284	291	ATGTACCT
SLIM1 enriched binding motif (EBM)	M0680_1.02	[A/C/G/T]AATG[T/A]A[C/T]CT[A/C/G/T]	AT5G12230	1	-1000 bp to TSS	402	409	ATGTACCT
SLIM1 enriched binding motif (EBM)	M0680_1.02	[A/C/G/T]AATG[T/A]A[C/T]CT[A/C/G/T]	AT5G12235	1	-1000 bp to TSS	264	257	AGGTACAT
SLIM1 enriched binding motif (EBM)	M0680_1.02	[A/C/G/T]AATG[T/A]A[C/T]CT[A/C/G/T]	AT5G12330	1	-1000 bp to TSS	810	817	ATGTACCT
SLIM1 enriched binding motif (EBM)	M0680_1.02	[A/C/G/T]AATG[T/A]A[C/T]CT[A/C/G/T]	AT5G12390	1	-1000 bp to TSS	97	90	AGGTACAT
SLIM1 enriched binding motif (EBM)	M0680_1.02	[A/C/G/T]AATG[T/A]A[C/T]CT[A/C/G/T]	AT5G12400	1	-1000 bp to TSS	615	622	ATGTACCT
SLIM1 enriched binding motif (EBM)	M0680_1.02	[A/C/G/T]AATG[T/A]A[C/T]CT[A/C/G/T]	AT5G13090	1	-1000 bp to TSS	169	162	AGGTACAT
SLIM1 enriched binding motif (EBM)	M0680_1.02	[A/C/G/T]AATG[T/A]A[C/T]CT[A/C/G/T]	AT5G13100	1	-1000 bp to TSS	62	69	ATGTACCT
SLIM1 enriched binding motif (EBM)	M0680_1.02	[A/C/G/T]AATG[T/A]A[C/T]CT[A/C/G/T]	AT5G13970	1	-1000 bp to TSS	169	176	ATGTACCT
SLIM1 enriched binding motif (EBM)	M0680_1.02	[A/C/G/T]AATG[T/A]A[C/T]CT[A/C/G/T]	AT5G14160	1	-1000 bp to TSS	255	262	ATGTACCT
SLIM1 enriched binding motif (EBM)	M0680_1.02	[A/C/G/T]AATG[T/A]A[C/T]CT[A/C/G/T]	AT5G14360	1	-1000 bp to TSS	429	422	AGGTACAT
SLIM1 enriched binding motif (EBM)	M0680_1.02	[A/C/G/T]AATG[T/A]A[C/T]CT[A/C/G/T]	AT5G14460	1	-1000 bp to TSS	166	159	AGGTACAT
SLIM1 enriched binding motif (EBM)	M0680_1.02	[A/C/G/T]AATG[T/A]A[C/T]CT[A/C/G/T]	AT5G14660	1	-1000 bp to TSS	32	39	ATGTACCT
SLIM1 enriched binding motif (EBM)	M0680_1.02	[A/C/G/T]AATG[T/A]A[C/T]CT[A/C/G/T]	AT5G14900	1	-1000 bp to TSS	468	475	ATGTACCT
SLIM1 enriched binding motif (EBM)	M0680_1.02	[A/C/G/T]AATG[T/A]A[C/T]CT[A/C/G/T]	AT5G15400	1	-1000 bp to TSS	535	528	AGGTACAT
SLIM1 enriched binding motif (EBM)	M0680_1.02	[A/C/G/T]AATG[T/A]A[C/T]CT[A/C/G/T]	AT5G15480	1	-1000 bp to TSS	455	462	ATGTACCT
SLIM1 enriched binding motif (EBM)	M0680_1.02	[A/C/G/T]AATG[T/A]A[C/T]CT[A/C/G/T]	AT5G15745	1	-1000 bp to TSS	146	139	AGGTACAT
SLIM1 enriched binding motif (EBM)	M0680_1.02	[A/C/G/T]AATG[T/A]A[C/T]CT[A/C/G/T]	AT5G16900	1	-1000 bp to TSS	219	226	ATGTACCT
SLIM1 enriched binding motif (EBM)	M0680_1.02	[A/C/G/T]AATG[T/A]A[C/T]CT[A/C/G/T]	AT5G17270	1	-1000 bp to TSS	747	740	AGGTACAT
SLIM1 enriched binding motif (EBM)	M0680_1.02	[A/C/G/T]AATG[T/A]A[C/T]CT[A/C/G/T]	AT5G17310	1	-1000 bp to TSS	517	524	ATGTACCT
SLIM1 enriched binding motif (EBM)	M0680_1.02	[A/C/G/T]AATG[T/A]A[C/T]CT[A/C/G/T]	AT5G17470	1	-1000 bp to TSS	386	393	ATGTACCT
SLIM1 enriched binding motif (EBM)	M0680_1.02	[A/C/G/T]AATG[T/A]A[C/T]CT[A/C/G/T]	AT5G17480	1	-1000 bp to TSS	422	415	AGGTACAT
SLIM1 enriched binding motif (EBM)	M0680_1.02	[A/C/G/T]AATG[T/A]A[C/T]CT[A/C/G/T]	AT5G17750	1	-1000 bp to TSS	663	656	AGGTACAT
SLIM1 enriched binding motif (EBM)	M0680_1.02	[A/C/G/T]AATG[T/A]A[C/T]CT[A/C/G/T]	AT5G18140	1	-1000 bp to TSS	951	944	AGGTACAT
SLIM1 enriched binding motif (EBM)	M0680_1.02	[A/C/G/T]AATG[T/A]A[C/T]CT[A/C/G/T]	AT5G18610	1	-1000 bp to TSS	295	302	ATGTACCT
SLIM1 enriched binding motif (EBM)	M0680_1.02	[A/C/G/T]AATG[T/A]A[C/T]CT[A/C/G/T]	AT5G18636	1	-1000 bp to TSS	186	179	AGGTACAT
SLIM1 enriched binding motif (EBM)	M0680_1.02	[A/C/G/T]AATG[T/A]A[C/T]CT[A/C/G/T]	AT5G18680	1	-1000 bp to TSS	949	956	ATGTACCT
SLIM1 enriched binding motif (EBM)	M0680_1.02	[A/C/G/T]AATG[T/A]A[C/T]CT[A/C/G/T]	AT5G18850	1	-1000 bp to TSS	552	545	AGGTACAT
SLIM1 enriched binding motif (EBM)	M0680_1.02	[A/C/G/T]AATG[T/A]A[C/T]CT[A/C/G/T]	AT5G18860	1	-1000 bp to TSS	851	844	AGGTACAT
SLIM1 enriched binding motif (EBM)	M0680_1.02	[A/C/G/T]AATG[T/A]A[C/T]CT[A/C/G/T]	AT5G19530	1	-1000 bp to TSS	869	876	ATGTACCT
SLIM1 enriched binding motif (EBM)	M0680_1.02	[A/C/G/T]AATG[T/A]A[C/T]CT[A/C/G/T]	AT5G19960	1	-1000 bp to TSS	538	545	ATGTACCT
SLIM1 enriched binding motif (EBM)	M0680_1.02	[A/C/G/T]AATG[T/A]A[C/T]CT[A/C/G/T]	AT5G20320	1	-1000 bp to TSS	123	116	AGGTACAT
SLIM1 enriched binding motif (EBM)	M0680_1.02	[A/C/G/T]AATG[T/A]A[C/T]CT[A/C/G/T]	AT5G20950	1	-1000 bp to TSS	601	608	ATGTACCT
SLIM1 enriched binding motif (EBM)	M0680_1.02	[A/C/G/T]AATG[T/A]A[C/T]CT[A/C/G/T]	AT5G21430	1	-1000 bp to TSS	238	231	AGGTACAT
SLIM1 enriched binding motif (EBM)	M0680_1.02	[A/C/G/T]AATG[T/A]A[C/T]CT[A/C/G/T]	AT5G22420	1	-1000 bp to TSS	180	173	AGGTACAT
SLIM1 enriched binding motif (EBM)	M0680_1.02	[A/C/G/T]AATG[T/A]A[C/T]CT[A/C/G/T]	AT5G24410	1	-1000 bp to TSS	668	661	AGGTACAT
SLIM1 enriched binding motif (EBM)	M0680_1.02	[A/C/G/T]AATG[T/A]A[C/T]CT[A/C/G/T]	AT5G24580	1	-1000 bp to TSS	988	981	AGGTACAT
SLIM1 enriched binding motif (EBM)	M0680_1.02	[A/C/G/T]AATG[T/A]A[C/T]CT[A/C/G/T]	AT5G25200	1	-1000 bp to TSS	29	22	AGGTACAT
SLIM1 enriched binding motif (EBM)	M0680_1.02	[A/C/G/T]AATG[T/A]A[C/T]CT[A/C/G/T]	AT5G25470	1	-1000 bp to TSS	126	133	ATGTACCT
SLIM1 enriched binding motif (EBM)	M0680_1.02	[A/C/G/T]AATG[T/A]A[C/T]CT[A/C/G/T]	AT5G25530	1	-1000 bp to TSS	259	266	ATGTACCT
SLIM1 enriched binding motif (EBM)	M0680_1.02	[A/C/G/T]AATG[T/A]A[C/T]CT[A/C/G/T]	AT5G25780	1	-1000 bp to TSS	160	153	AGGTACAT
SLIM1 enriched binding motif (EBM)	M0680_1.02	[A/C/G/T]AATG[T/A]A[C/T]CT[A/C/G/T]	AT5G25880	1	-1000 bp to TSS	753	746	AGGTACAT
SLIM1 enriched binding motif (EBM)	M0680_1.02	[A/C/G/T]AATG[T/A]A[C/T]CT[A/C/G/T]	AT5G26260	1	-1000 bp to TSS	110	103	AGGTACAT
SLIM1 enriched binding motif (EBM)	M0680_1.02	[A/C/G/T]AATG[T/A]A[C/T]CT[A/C/G/T]	AT5G27247	1	-1000 bp to TSS	426	433	ATGTACCT
SLIM1 enriched binding motif (EBM)	M0680_1.02	[A/C/G/T]AATG[T/A]A[C/T]CT[A/C/G/T]	AT5G27765	1	-1000 bp to TSS	14	21	ATGTACCT
SLIM1 enriched binding motif (EBM)	M0680_1.02	[A/C/G/T]AATG[T/A]A[C/T]CT[A/C/G/T]	AT5G28010	1	-1000 bp to TSS	179	186	ATGTACCT
SLIM1 enriched binding motif (EBM)	M0680_1.02	[A/C/G/T]AATG[T/A]A[C/T]CT[A/C/G/T]	AT5G28080	1	-1000 bp to TSS	677	670	AGGTACAT
SLIM1 enriched binding motif (EBM)	M0680_1.02	[A/C/G/T]AATG[T/A]A[C/T]CT[A/C/G/T]	AT5G28510	1	-1000 bp to TSS	255	262	ATGTACCT
SLIM1 enriched binding motif (EBM)	M0680_1.02	[A/C/G/T]AATG[T/A]A[C/T]CT[A/C/G/T]	AT5G28625	1	-1000 bp to TSS	867	874	ATGTACCT
SLIM1 enriched binding motif (EBM)	M0680_1.02	[A/C/G/T]AATG[T/A]A[C/T]CT[A/C/G/T]	AT5G33406	1	-1000 bp to TSS	602	595	AGGTACAT
SLIM1 enriched binding motif (EBM)	M0680_1.02	[A/C/G/T]AATG[T/A]A[C/T]CT[A/C/G/T]	AT5G35330	1	-1000 bp to TSS	401	408	ATGTACCT
SLIM1 enriched binding motif (EBM)	M0680_1.02	[A/C/G/T]AATG[T/A]A[C/T]CT[A/C/G/T]	AT5G35670	1	-1000 bp to TSS	266	273	ATGTACCT
SLIM1 enriched binding motif (EBM)	M0680_1.02	[A/C/G/T]AATG[T/A]A[C/T]CT[A/C/G/T]	AT5G37800	1	-1000 bp to TSS	454	447	AGGTACAT
SLIM1 enriched binding motif (EBM)	M0680_1.02	[A/C/G/T]AATG[T/A]A[C/T]CT[A/C/G/T]	AT5G37830	1	-1000 bp to TSS	210	217	ATGTACCT
SLIM1 enriched binding motif (EBM)	M0680_1.02	[A/C/G/T]AATG[T/A]A[C/T]CT[A/C/G/T]	AT5G38380	1	-1000 bp to TSS	393	400	ATGTACCT
SLIM1 enriched binding motif (EBM)	M0680_1.02	[A/C/G/T]AATG[T/A]A[C/T]CT[A/C/G/T]	AT5G39520	1	-1000 bp to TSS	720	713	AGGTACAT
SLIM1 enriched binding motif (EBM)	M0680_1.02	[A/C/G/T]AATG[T/A]A[C/T]CT[A/C/G/T]	AT5G39980	1	-1000 bp to TSS	139	132	AGGTACAT
SLIM1 enriched binding motif (EBM)	M0680_1.02	[A/C/G/T]AATG[T/A]A[C/T]CT[A/C/G/T]	AT5G39990	1	-1000 bp to TSS	682	689	ATGTACCT
SLIM1 enriched binding motif (EBM)	M0680_1.02	[A/C/G/T]AATG[T/A]A[C/T]CT[A/C/G/T]	AT5G40100	1	-1000 bp to TSS	101	108	ATGTACCT
SLIM1 enriched binding motif (EBM)	M0680_1.02	[A/C/G/T]AATG[T/A]A[C/T]CT[A/C/G/T]	AT5G41050	1	-1000 bp to TSS	379	386	ATGTACCT
SLIM1 enriched binding motif (EBM)	M0680_1.02	[A/C/G/T]AATG[T/A]A[C/T]CT[A/C/G/T]	AT5G41060	1	-1000 bp to TSS	928	921	AGGTACAT
SLIM1 enriched binding motif (EBM)	M0680_1.02	[A/C/G/T]AATG[T/A]A[C/T]CT[A/C/G/T]	AT5G41860	1	-1000 bp to TSS	367	374	ATGTACCT
SLIM1 enriched binding motif (EBM)	M0680_1.02	[A/C/G/T]AATG[T/A]A[C/T]CT[A/C/G/T]	AT5G42510	1	-1000 bp to TSS	713	706	AGGTACAT
SLIM1 enriched binding motif (EBM)	M0680_1.02	[A/C/G/T]AATG[T/A]A[C/T]CT[A/C/G/T]	AT5G42765	1	-1000 bp to TSS	867	860	AGGTACAT
SLIM1 enriched binding motif (EBM)	M0680_1.02	[A/C/G/T]AATG[T/A]A[C/T]CT[A/C/G/T]	AT5G42770	1	-1000 bp to TSS	828	835	ATGTACCT
SLIM1 enriched binding motif (EBM)	M0680_1.02	[A/C/G/T]AATG[T/A]A[C/T]CT[A/C/G/T]	AT5G42780	1	-1000 bp to TSS	644	637	AGGTACAT
SLIM1 enriched binding motif (EBM)	M0680_1.02	[A/C/G/T]AATG[T/A]A[C/T]CT[A/C/G/T]	AT5G43000	1	-1000 bp to TSS	507	514	ATGTACCT
SLIM1 enriched binding motif (EBM)	M0680_1.02	[A/C/G/T]AATG[T/A]A[C/T]CT[A/C/G/T]	AT5G43070	1	-1000 bp to TSS	208	201	AGGTACAT
SLIM1 enriched binding motif (EBM)	M0680_1.02	[A/C/G/T]AATG[T/A]A[C/T]CT[A/C/G/T]	AT5G43500	1	-1000 bp to TSS	172	165	AGGTACAT
SLIM1 enriched binding motif (EBM)	M0680_1.02	[A/C/G/T]AATG[T/A]A[C/T]CT[A/C/G/T]	AT5G43530	1	-1000 bp to TSS	28	21	AGGTACAT
SLIM1 enriched binding motif (EBM)	M0680_1.02	[A/C/G/T]AATG[T/A]A[C/T]CT[A/C/G/T]	AT5G43690	1	-1000 bp to TSS	888	895	ATGTACCT
SLIM1 enriched binding motif (EBM)	M0680_1.02	[A/C/G/T]AATG[T/A]A[C/T]CT[A/C/G/T]	AT5G44350	1	-1000 bp to TSS	16	23	ATGTACCT
SLIM1 enriched binding motif (EBM)	M0680_1.02	[A/C/G/T]AATG[T/A]A[C/T]CT[A/C/G/T]	AT5G44562	1	-1000 bp to TSS	58	65	ATGTACCT
SLIM1 enriched binding motif (EBM)	M0680_1.02	[A/C/G/T]AATG[T/A]A[C/T]CT[A/C/G/T]	AT5G44600	1	-1000 bp to TSS	554	547	AGGTACAT
SLIM1 enriched binding motif (EBM)	M0680_1.02	[A/C/G/T]AATG[T/A]A[C/T]CT[A/C/G/T]	AT5G44760	1	-1000 bp to TSS	65	58	AGGTACAT
SLIM1 enriched binding motif (EBM)	M0680_1.02	[A/C/G/T]AATG[T/A]A[C/T]CT[A/C/G/T]	AT5G46530	1	-1000 bp to TSS	695	688	AGGTACAT
SLIM1 enriched binding motif (EBM)	M0680_1.02	[A/C/G/T]AATG[T/A]A[C/T]CT[A/C/G/T]	AT5G46930	1	-1000 bp to TSS	66	73	ATGTACCT
SLIM1 enriched binding motif (EBM)	M0680_1.02	[A/C/G/T]AATG[T/A]A[C/T]CT[A/C/G/T]	AT5G47160	1	-1000 bp to TSS	433	426	AGGTACAT
SLIM1 enriched binding motif (EBM)	M0680_1.02	[A/C/G/T]AATG[T/A]A[C/T]CT[A/C/G/T]	AT5G48010	1	-1000 bp to TSS	361	368	ATGTACCT
SLIM1 enriched binding motif (EBM)	M0680_1.02	[A/C/G/T]AATG[T/A]A[C/T]CT[A/C/G/T]	AT5G48620	1	-1000 bp to TSS	250	257	ATGTACCT
SLIM1 enriched binding motif (EBM)	M0680_1.02	[A/C/G/T]AATG[T/A]A[C/T]CT[A/C/G/T]	AT5G48740	1	-1000 bp to TSS	266	259	AGGTACAT
SLIM1 enriched binding motif (EBM)	M0680_1.02	[A/C/G/T]AATG[T/A]A[C/T]CT[A/C/G/T]	AT5G48990	1	-1000 bp to TSS	526	533	ATGTACCT
SLIM1 enriched binding motif (EBM)	M0680_1.02	[A/C/G/T]AATG[T/A]A[C/T]CT[A/C/G/T]	AT5G49301	1	-1000 bp to TSS	187	194	ATGTACCT
SLIM1 enriched binding motif (EBM)	M0680_1.02	[A/C/G/T]AATG[T/A]A[C/T]CT[A/C/G/T]	AT5G49320	1	-1000 bp to TSS	252	245	AGGTACAT
SLIM1 enriched binding motif (EBM)	M0680_1.02	[A/C/G/T]AATG[T/A]A[C/T]CT[A/C/G/T]	AT5G49950	1	-1000 bp to TSS	184	177	AGGTACAT
SLIM1 enriched binding motif (EBM)	M0680_1.02	[A/C/G/T]AATG[T/A]A[C/T]CT[A/C/G/T]	AT5G50090	1	-1000 bp to TSS	364	357	AGGTACAT
SLIM1 enriched binding motif (EBM)	M0680_1.02	[A/C/G/T]AATG[T/A]A[C/T]CT[A/C/G/T]	AT5G50180	1	-1000 bp to TSS	647	654	ATGTACCT
SLIM1 enriched binding motif (EBM)	M0680_1.02	[A/C/G/T]AATG[T/A]A[C/T]CT[A/C/G/T]	AT5G50280	1	-1000 bp to TSS	622	615	AGGTACAT
SLIM1 enriched binding motif (EBM)	M0680_1.02	[A/C/G/T]AATG[T/A]A[C/T]CT[A/C/G/T]	AT5G50910	1	-1000 bp to TSS	278	285	ATGTACCT
SLIM1 enriched binding motif (EBM)	M0680_1.02	[A/C/G/T]AATG[T/A]A[C/T]CT[A/C/G/T]	AT5G51130	1	-1000 bp to TSS	337	344	ATGTACCT
SLIM1 enriched binding motif (EBM)	M0680_1.02	[A/C/G/T]AATG[T/A]A[C/T]CT[A/C/G/T]	AT5G51280	1	-1000 bp to TSS	202	195	AGGTACAT
SLIM1 enriched binding motif (EBM)	M0680_1.02	[A/C/G/T]AATG[T/A]A[C/T]CT[A/C/G/T]	AT5G51940	1	-1000 bp to TSS	105	98	AGGTACAT
SLIM1 enriched binding motif (EBM)	M0680_1.02	[A/C/G/T]AATG[T/A]A[C/T]CT[A/C/G/T]	AT5G52080	1	-1000 bp to TSS	250	243	AGGTACAT
SLIM1 enriched binding motif (EBM)	M0680_1.02	[A/C/G/T]AATG[T/A]A[C/T]CT[A/C/G/T]	AT5G52180	1	-1000 bp to TSS	598	605	ATGTACCT
SLIM1 enriched binding motif (EBM)	M0680_1.02	[A/C/G/T]AATG[T/A]A[C/T]CT[A/C/G/T]	AT5G52430	1	-1000 bp to TSS	691	684	AGGTACAT
SLIM1 enriched binding motif (EBM)	M0680_1.02	[A/C/G/T]AATG[T/A]A[C/T]CT[A/C/G/T]	AT5G52600	1	-1000 bp to TSS	347	340	AGGTACAT
SLIM1 enriched binding motif (EBM)	M0680_1.02	[A/C/G/T]AATG[T/A]A[C/T]CT[A/C/G/T]	AT5G52790	1	-1000 bp to TSS	680	673	AGGTACAT
SLIM1 enriched binding motif (EBM)	M0680_1.02	[A/C/G/T]AATG[T/A]A[C/T]CT[A/C/G/T]	AT5G52800	1	-1000 bp to TSS	394	401	ATGTACCT
SLIM1 enriched binding motif (EBM)	M0680_1.02	[A/C/G/T]AATG[T/A]A[C/T]CT[A/C/G/T]	AT5G52965	1	-1000 bp to TSS	329	322	AGGTACAT
SLIM1 enriched binding motif (EBM)	M0680_1.02	[A/C/G/T]AATG[T/A]A[C/T]CT[A/C/G/T]	AT5G53850	1	-1000 bp to TSS	924	931	ATGTACCT
SLIM1 enriched binding motif (EBM)	M0680_1.02	[A/C/G/T]AATG[T/A]A[C/T]CT[A/C/G/T]	AT5G54075	1	-1000 bp to TSS	594	601	ATGTACCT
SLIM1 enriched binding motif (EBM)	M0680_1.02	[A/C/G/T]AATG[T/A]A[C/T]CT[A/C/G/T]	AT5G54340	1	-1000 bp to TSS	45	52	ATGTACCT
SLIM1 enriched binding motif (EBM)	M0680_1.02	[A/C/G/T]AATG[T/A]A[C/T]CT[A/C/G/T]	AT5G54380	1	-1000 bp to TSS	125	132	ATGTACCT
SLIM1 enriched binding motif (EBM)	M0680_1.02	[A/C/G/T]AATG[T/A]A[C/T]CT[A/C/G/T]	AT5G54400	1	-1000 bp to TSS	605	598	AGGTACAT
SLIM1 enriched binding motif (EBM)	M0680_1.02	[A/C/G/T]AATG[T/A]A[C/T]CT[A/C/G/T]	AT5G54740	1	-1000 bp to TSS	124	117	AGGTACAT
SLIM1 enriched binding motif (EBM)	M0680_1.02	[A/C/G/T]AATG[T/A]A[C/T]CT[A/C/G/T]	AT5G55710	1	-1000 bp to TSS	529	536	ATGTACCT
SLIM1 enriched binding motif (EBM)	M0680_1.02	[A/C/G/T]AATG[T/A]A[C/T]CT[A/C/G/T]	AT5G56140	1	-1000 bp to TSS	661	668	ATGTACCT
SLIM1 enriched binding motif (EBM)	M0680_1.02	[A/C/G/T]AATG[T/A]A[C/T]CT[A/C/G/T]	AT5G56350	1	-1000 bp to TSS	661	654	AGGTACAT
SLIM1 enriched binding motif (EBM)	M0680_1.02	[A/C/G/T]AATG[T/A]A[C/T]CT[A/C/G/T]	AT5G56410	1	-1000 bp to TSS	79	72	AGGTACAT
SLIM1 enriched binding motif (EBM)	M0680_1.02	[A/C/G/T]AATG[T/A]A[C/T]CT[A/C/G/T]	AT5G56690	1	-1000 bp to TSS	622	629	ATGTACCT
SLIM1 enriched binding motif (EBM)	M0680_1.02	[A/C/G/T]AATG[T/A]A[C/T]CT[A/C/G/T]	AT5G57260	1	-1000 bp to TSS	117	110	AGGTACAT
SLIM1 enriched binding motif (EBM)	M0680_1.02	[A/C/G/T]AATG[T/A]A[C/T]CT[A/C/G/T]	AT5G58040	1	-1000 bp to TSS	154	161	ATGTACCT
SLIM1 enriched binding motif (EBM)	M0680_1.02	[A/C/G/T]AATG[T/A]A[C/T]CT[A/C/G/T]	AT5G59000	1	-1000 bp to TSS	246	239	AGGTACAT
SLIM1 enriched binding motif (EBM)	M0680_1.02	[A/C/G/T]AATG[T/A]A[C/T]CT[A/C/G/T]	AT5G59410	1	-1000 bp to TSS	916	909	AGGTACAT
SLIM1 enriched binding motif (EBM)	M0680_1.02	[A/C/G/T]AATG[T/A]A[C/T]CT[A/C/G/T]	AT5G59420	1	-1000 bp to TSS	507	514	ATGTACCT
SLIM1 enriched binding motif (EBM)	M0680_1.02	[A/C/G/T]AATG[T/A]A[C/T]CT[A/C/G/T]	AT5G59430	1	-1000 bp to TSS	52	45	AGGTACAT
SLIM1 enriched binding motif (EBM)	M0680_1.02	[A/C/G/T]AATG[T/A]A[C/T]CT[A/C/G/T]	AT5G59480	1	-1000 bp to TSS	349	356	ATGTACCT
SLIM1 enriched binding motif (EBM)	M0680_1.02	[A/C/G/T]AATG[T/A]A[C/T]CT[A/C/G/T]	AT5G59505	1	-1000 bp to TSS	785	792	ATGTACCT
SLIM1 enriched binding motif (EBM)	M0680_1.02	[A/C/G/T]AATG[T/A]A[C/T]CT[A/C/G/T]	AT5G60430	1	-1000 bp to TSS	91	98	ATGTACCT
SLIM1 enriched binding motif (EBM)	M0680_1.02	[A/C/G/T]AATG[T/A]A[C/T]CT[A/C/G/T]	AT5G60940	1	-1000 bp to TSS	107	114	ATGTACCT
SLIM1 enriched binding motif (EBM)	M0680_1.02	[A/C/G/T]AATG[T/A]A[C/T]CT[A/C/G/T]	AT5G60990	1	-1000 bp to TSS	250	243	AGGTACAT
SLIM1 enriched binding motif (EBM)	M0680_1.02	[A/C/G/T]AATG[T/A]A[C/T]CT[A/C/G/T]	AT5G61070	1	-1000 bp to TSS	536	529	AGGTACAT
SLIM1 enriched binding motif (EBM)	M0680_1.02	[A/C/G/T]AATG[T/A]A[C/T]CT[A/C/G/T]	AT5G61420	1	-1000 bp to TSS	128	121	AGGTACAT
SLIM1 enriched binding motif (EBM)	M0680_1.02	[A/C/G/T]AATG[T/A]A[C/T]CT[A/C/G/T]	AT5G61500	1	-1000 bp to TSS	865	872	ATGTACCT
SLIM1 enriched binding motif (EBM)	M0680_1.02	[A/C/G/T]AATG[T/A]A[C/T]CT[A/C/G/T]	AT5G62600	1	-1000 bp to TSS	92	85	AGGTACAT
SLIM1 enriched binding motif (EBM)	M0680_1.02	[A/C/G/T]AATG[T/A]A[C/T]CT[A/C/G/T]	AT5G63150	1	-1000 bp to TSS	154	147	AGGTACAT
SLIM1 enriched binding motif (EBM)	M0680_1.02	[A/C/G/T]AATG[T/A]A[C/T]CT[A/C/G/T]	AT5G64860	1	-1000 bp to TSS	422	429	ATGTACCT
SLIM1 enriched binding motif (EBM)	M0680_1.02	[A/C/G/T]AATG[T/A]A[C/T]CT[A/C/G/T]	AT5G64905	1	-1000 bp to TSS	894	901	ATGTACCT
SLIM1 enriched binding motif (EBM)	M0680_1.02	[A/C/G/T]AATG[T/A]A[C/T]CT[A/C/G/T]	AT5G65613	1	-1000 bp to TSS	735	728	AGGTACAT
SLIM1 enriched binding motif (EBM)	M0680_1.02	[A/C/G/T]AATG[T/A]A[C/T]CT[A/C/G/T]	AT5G65620	1	-1000 bp to TSS	423	430	ATGTACCT
SLIM1 enriched binding motif (EBM)	M0680_1.02	[A/C/G/T]AATG[T/A]A[C/T]CT[A/C/G/T]	AT5G65730	1	-1000 bp to TSS	739	746	ATGTACCT
SLIM1 enriched binding motif (EBM)	M0680_1.02	[A/C/G/T]AATG[T/A]A[C/T]CT[A/C/G/T]	AT5G65970	1	-1000 bp to TSS	851	844	AGGTACAT
SLIM1 enriched binding motif (EBM)	M0680_1.02	[A/C/G/T]AATG[T/A]A[C/T]CT[A/C/G/T]	AT5G66053	1	-1000 bp to TSS	660	667	ATGTACCT
SLIM1 enriched binding motif (EBM)	M0680_1.02	[A/C/G/T]AATG[T/A]A[C/T]CT[A/C/G/T]	AT5G66070	1	-1000 bp to TSS	37	44	ATGTACCT
SLIM1 enriched binding motif (EBM)	M0680_1.02	[A/C/G/T]AATG[T/A]A[C/T]CT[A/C/G/T]	AT5G66170	1	-1000 bp to TSS	165	158	AGGTACAT
SLIM1 enriched binding motif (EBM)	M0680_1.02	[A/C/G/T]AATG[T/A]A[C/T]CT[A/C/G/T]	AT5G66250	1	-1000 bp to TSS	532	525	AGGTACAT
SLIM1 enriched binding motif (EBM)	M0680_1.02	[A/C/G/T]AATG[T/A]A[C/T]CT[A/C/G/T]	AT5G66290	1	-1000 bp to TSS	377	384	ATGTACCT
SLIM1 enriched binding motif (EBM)	M0680_1.02	[A/C/G/T]AATG[T/A]A[C/T]CT[A/C/G/T]	AT5G66370	1	-1000 bp to TSS	98	105	ATGTACCT
SLIM1 enriched binding motif (EBM)	M0680_1.02	[A/C/G/T]AATG[T/A]A[C/T]CT[A/C/G/T]	ATCG00470	1	-1000 bp to TSS	490	497	ATGTACCT
SLIM1 enriched binding motif (EBM)	M0680_1.02	[A/C/G/T]AATG[T/A]A[C/T]CT[A/C/G/T]	AT1G72810	3	-1000 bp to TSS	638	631	AGATTCAT
SLIM1 enriched binding motif (EBM)	M0680_1.02	[A/C/G/T]AATG[T/A]A[C/T]CT[A/C/G/T]	AT1G72810	3	-1000 bp to TSS	830	823	AGATTCAT
SLIM1 enriched binding motif (EBM)	M0680_1.02	[A/C/G/T]AATG[T/A]A[C/T]CT[A/C/G/T]	AT1G72810	3	-1000 bp to TSS	847	840	AGATTCAT
SLIM1 enriched binding motif (EBM)	M0680_1.02	[A/C/G/T]AATG[T/A]A[C/T]CT[A/C/G/T]	AT4G01160	3	-1000 bp to TSS	179	172	AGATTCAT
SLIM1 enriched binding motif (EBM)	M0680_1.02	[A/C/G/T]AATG[T/A]A[C/T]CT[A/C/G/T]	AT4G01160	3	-1000 bp to TSS	349	342	AGATTCAT
SLIM1 enriched binding motif (EBM)	M0680_1.02	[A/C/G/T]AATG[T/A]A[C/T]CT[A/C/G/T]	AT4G01160	3	-1000 bp to TSS	658	651	AGATTCAT
SLIM1 enriched binding motif (EBM)	M0680_1.02	[A/C/G/T]AATG[T/A]A[C/T]CT[A/C/G/T]	AT5G23235	3	-1000 bp to TSS	73	66	AGATTCAT
SLIM1 enriched binding motif (EBM)	M0680_1.02	[A/C/G/T]AATG[T/A]A[C/T]CT[A/C/G/T]	AT5G23235	3	-1000 bp to TSS	613	620	ATGAATCT
SLIM1 enriched binding motif (EBM)	M0680_1.02	[A/C/G/T]AATG[T/A]A[C/T]CT[A/C/G/T]	AT5G23235	3	-1000 bp to TSS	847	854	ATGAATCT
SLIM1 enriched binding motif (EBM)	M0680_1.02	[A/C/G/T]AATG[T/A]A[C/T]CT[A/C/G/T]	AT5G45450	3	-1000 bp to TSS	725	718	AGATTCAT
SLIM1 enriched binding motif (EBM)	M0680_1.02	[A/C/G/T]AATG[T/A]A[C/T]CT[A/C/G/T]	AT5G45450	3	-1000 bp to TSS	779	772	AGATTCAT
SLIM1 enriched binding motif (EBM)	M0680_1.02	[A/C/G/T]AATG[T/A]A[C/T]CT[A/C/G/T]	AT5G45450	3	-1000 bp to TSS	954	947	AGATTCAT
SLIM1 enriched binding motif (EBM)	M0680_1.02	[A/C/G/T]AATG[T/A]A[C/T]CT[A/C/G/T]	AT1G04023	2	-1000 bp to TSS	376	383	ATGAATCT
SLIM1 enriched binding motif (EBM)	M0680_1.02	[A/C/G/T]AATG[T/A]A[C/T]CT[A/C/G/T]	AT1G04023	2	-1000 bp to TSS	498	491	AGATTCAT
SLIM1 enriched binding motif (EBM)	M0680_1.02	[A/C/G/T]AATG[T/A]A[C/T]CT[A/C/G/T]	AT1G04260	2	-1000 bp to TSS	263	256	AGATTCAT
SLIM1 enriched binding motif (EBM)	M0680_1.02	[A/C/G/T]AATG[T/A]A[C/T]CT[A/C/G/T]	AT1G04260	2	-1000 bp to TSS	700	693	AGATTCAT
SLIM1 enriched binding motif (EBM)	M0680_1.02	[A/C/G/T]AATG[T/A]A[C/T]CT[A/C/G/T]	AT1G04520	2	-1000 bp to TSS	139	132	AGATTCAT
SLIM1 enriched binding motif (EBM)	M0680_1.02	[A/C/G/T]AATG[T/A]A[C/T]CT[A/C/G/T]	AT1G04520	2	-1000 bp to TSS	499	506	ATGAATCT
SLIM1 enriched binding motif (EBM)	M0680_1.02	[A/C/G/T]AATG[T/A]A[C/T]CT[A/C/G/T]	AT1G05005	2	-1000 bp to TSS	142	149	ATGAATCT
SLIM1 enriched binding motif (EBM)	M0680_1.02	[A/C/G/T]AATG[T/A]A[C/T]CT[A/C/G/T]	AT1G05005	2	-1000 bp to TSS	282	275	AGATTCAT
SLIM1 enriched binding motif (EBM)	M0680_1.02	[A/C/G/T]AATG[T/A]A[C/T]CT[A/C/G/T]	AT1G05133	2	-1000 bp to TSS	61	68	ATGAATCT
SLIM1 enriched binding motif (EBM)	M0680_1.02	[A/C/G/T]AATG[T/A]A[C/T]CT[A/C/G/T]	AT1G05133	2	-1000 bp to TSS	62	55	AGATTCAT
SLIM1 enriched binding motif (EBM)	M0680_1.02	[A/C/G/T]AATG[T/A]A[C/T]CT[A/C/G/T]	AT1G05477	2	-1000 bp to TSS	339	332	AGATTCAT
SLIM1 enriched binding motif (EBM)	M0680_1.02	[A/C/G/T]AATG[T/A]A[C/T]CT[A/C/G/T]	AT1G05477	2	-1000 bp to TSS	775	768	AGATTCAT
SLIM1 enriched binding motif (EBM)	M0680_1.02	[A/C/G/T]AATG[T/A]A[C/T]CT[A/C/G/T]	AT1G05940	2	-1000 bp to TSS	100	93	AGATTCAT
SLIM1 enriched binding motif (EBM)	M0680_1.02	[A/C/G/T]AATG[T/A]A[C/T]CT[A/C/G/T]	AT1G05940	2	-1000 bp to TSS	793	800	ATGAATCT
SLIM1 enriched binding motif (EBM)	M0680_1.02	[A/C/G/T]AATG[T/A]A[C/T]CT[A/C/G/T]	AT1G07693	2	-1000 bp to TSS	310	303	AGATTCAT
SLIM1 enriched binding motif (EBM)	M0680_1.02	[A/C/G/T]AATG[T/A]A[C/T]CT[A/C/G/T]	AT1G07693	2	-1000 bp to TSS	481	488	ATGAATCT
SLIM1 enriched binding motif (EBM)	M0680_1.02	[A/C/G/T]AATG[T/A]A[C/T]CT[A/C/G/T]	AT1G07697	2	-1000 bp to TSS	615	608	AGATTCAT
SLIM1 enriched binding motif (EBM)	M0680_1.02	[A/C/G/T]AATG[T/A]A[C/T]CT[A/C/G/T]	AT1G07697	2	-1000 bp to TSS	786	793	ATGAATCT
SLIM1 enriched binding motif (EBM)	M0680_1.02	[A/C/G/T]AATG[T/A]A[C/T]CT[A/C/G/T]	AT1G08933	2	-1000 bp to TSS	265	272	ATGAATCT
SLIM1 enriched binding motif (EBM)	M0680_1.02	[A/C/G/T]AATG[T/A]A[C/T]CT[A/C/G/T]	AT1G08933	2	-1000 bp to TSS	899	892	AGATTCAT
SLIM1 enriched binding motif (EBM)	M0680_1.02	[A/C/G/T]AATG[T/A]A[C/T]CT[A/C/G/T]	AT1G09083	2	-1000 bp to TSS	20	13	AGATTCAT
SLIM1 enriched binding motif (EBM)	M0680_1.02	[A/C/G/T]AATG[T/A]A[C/T]CT[A/C/G/T]	AT1G09083	2	-1000 bp to TSS	881	874	AGATTCAT
SLIM1 enriched binding motif (EBM)	M0680_1.02	[A/C/G/T]AATG[T/A]A[C/T]CT[A/C/G/T]	AT1G09187	2	-1000 bp to TSS	24	31	ATGAATCT
SLIM1 enriched binding motif (EBM)	M0680_1.02	[A/C/G/T]AATG[T/A]A[C/T]CT[A/C/G/T]	AT1G09187	2	-1000 bp to TSS	58	51	AGATTCAT
SLIM1 enriched binding motif (EBM)	M0680_1.02	[A/C/G/T]AATG[T/A]A[C/T]CT[A/C/G/T]	AT1G12670	2	-1000 bp to TSS	802	795	AGATTCAT
SLIM1 enriched binding motif (EBM)	M0680_1.02	[A/C/G/T]AATG[T/A]A[C/T]CT[A/C/G/T]	AT1G12670	2	-1000 bp to TSS	837	830	AGATTCAT
SLIM1 enriched binding motif (EBM)	M0680_1.02	[A/C/G/T]AATG[T/A]A[C/T]CT[A/C/G/T]	AT1G17130	2	-1000 bp to TSS	483	490	ATGAATCT
SLIM1 enriched binding motif (EBM)	M0680_1.02	[A/C/G/T]AATG[T/A]A[C/T]CT[A/C/G/T]	AT1G17130	2	-1000 bp to TSS	535	528	AGATTCAT
SLIM1 enriched binding motif (EBM)	M0680_1.02	[A/C/G/T]AATG[T/A]A[C/T]CT[A/C/G/T]	AT1G18470	2	-1000 bp to TSS	160	153	AGATTCAT
SLIM1 enriched binding motif (EBM)	M0680_1.02	[A/C/G/T]AATG[T/A]A[C/T]CT[A/C/G/T]	AT1G18470	2	-1000 bp to TSS	202	195	AGATTCAT
SLIM1 enriched binding motif (EBM)	M0680_1.02	[A/C/G/T]AATG[T/A]A[C/T]CT[A/C/G/T]	AT1G18480	2	-1000 bp to TSS	558	565	ATGAATCT
SLIM1 enriched binding motif (EBM)	M0680_1.02	[A/C/G/T]AATG[T/A]A[C/T]CT[A/C/G/T]	AT1G18480	2	-1000 bp to TSS	600	607	ATGAATCT
SLIM1 enriched binding motif (EBM)	M0680_1.02	[A/C/G/T]AATG[T/A]A[C/T]CT[A/C/G/T]	AT1G18610	2	-1000 bp to TSS	358	365	ATGAATCT
SLIM1 enriched binding motif (EBM)	M0680_1.02	[A/C/G/T]AATG[T/A]A[C/T]CT[A/C/G/T]	AT1G18610	2	-1000 bp to TSS	575	582	ATGAATCT
SLIM1 enriched binding motif (EBM)	M0680_1.02	[A/C/G/T]AATG[T/A]A[C/T]CT[A/C/G/T]	AT1G23220	2	-1000 bp to TSS	403	396	AGATTCAT
SLIM1 enriched binding motif (EBM)	M0680_1.02	[A/C/G/T]AATG[T/A]A[C/T]CT[A/C/G/T]	AT1G23220	2	-1000 bp to TSS	518	511	AGATTCAT
SLIM1 enriched binding motif (EBM)	M0680_1.02	[A/C/G/T]AATG[T/A]A[C/T]CT[A/C/G/T]	AT1G23460	2	-1000 bp to TSS	490	497	ATGAATCT
SLIM1 enriched binding motif (EBM)	M0680_1.02	[A/C/G/T]AATG[T/A]A[C/T]CT[A/C/G/T]	AT1G23460	2	-1000 bp to TSS	793	800	ATGAATCT
SLIM1 enriched binding motif (EBM)	M0680_1.02	[A/C/G/T]AATG[T/A]A[C/T]CT[A/C/G/T]	AT1G27550	2	-1000 bp to TSS	333	326	AGATTCAT
SLIM1 enriched binding motif (EBM)	M0680_1.02	[A/C/G/T]AATG[T/A]A[C/T]CT[A/C/G/T]	AT1G27550	2	-1000 bp to TSS	477	484	ATGAATCT
SLIM1 enriched binding motif (EBM)	M0680_1.02	[A/C/G/T]AATG[T/A]A[C/T]CT[A/C/G/T]	AT1G27555	2	-1000 bp to TSS	458	451	AGATTCAT
SLIM1 enriched binding motif (EBM)	M0680_1.02	[A/C/G/T]AATG[T/A]A[C/T]CT[A/C/G/T]	AT1G27555	2	-1000 bp to TSS	602	609	ATGAATCT
SLIM1 enriched binding motif (EBM)	M0680_1.02	[A/C/G/T]AATG[T/A]A[C/T]CT[A/C/G/T]	AT1G28780	2	-1000 bp to TSS	371	364	AGATTCAT
SLIM1 enriched binding motif (EBM)	M0680_1.02	[A/C/G/T]AATG[T/A]A[C/T]CT[A/C/G/T]	AT1G28780	2	-1000 bp to TSS	821	814	AGATTCAT
SLIM1 enriched binding motif (EBM)	M0680_1.02	[A/C/G/T]AATG[T/A]A[C/T]CT[A/C/G/T]	AT1G29510	2	-1000 bp to TSS	448	455	ATGAATCT
SLIM1 enriched binding motif (EBM)	M0680_1.02	[A/C/G/T]AATG[T/A]A[C/T]CT[A/C/G/T]	AT1G29510	2	-1000 bp to TSS	487	494	ATGAATCT
SLIM1 enriched binding motif (EBM)	M0680_1.02	[A/C/G/T]AATG[T/A]A[C/T]CT[A/C/G/T]	AT1G43710	2	-1000 bp to TSS	571	564	AGATTCAT
SLIM1 enriched binding motif (EBM)	M0680_1.02	[A/C/G/T]AATG[T/A]A[C/T]CT[A/C/G/T]	AT1G43710	2	-1000 bp to TSS	853	860	ATGAATCT
SLIM1 enriched binding motif (EBM)	M0680_1.02	[A/C/G/T]AATG[T/A]A[C/T]CT[A/C/G/T]	AT1G47740	2	-1000 bp to TSS	331	324	AGATTCAT
SLIM1 enriched binding motif (EBM)	M0680_1.02	[A/C/G/T]AATG[T/A]A[C/T]CT[A/C/G/T]	AT1G47740	2	-1000 bp to TSS	597	590	AGATTCAT
SLIM1 enriched binding motif (EBM)	M0680_1.02	[A/C/G/T]AATG[T/A]A[C/T]CT[A/C/G/T]	AT1G51060	2	-1000 bp to TSS	50	43	AGATTCAT
SLIM1 enriched binding motif (EBM)	M0680_1.02	[A/C/G/T]AATG[T/A]A[C/T]CT[A/C/G/T]	AT1G51060	2	-1000 bp to TSS	505	498	AGATTCAT
SLIM1 enriched binding motif (EBM)	M0680_1.02	[A/C/G/T]AATG[T/A]A[C/T]CT[A/C/G/T]	AT1G52827	2	-1000 bp to TSS	815	822	ATGAATCT
SLIM1 enriched binding motif (EBM)	M0680_1.02	[A/C/G/T]AATG[T/A]A[C/T]CT[A/C/G/T]	AT1G52827	2	-1000 bp to TSS	852	859	ATGAATCT
SLIM1 enriched binding motif (EBM)	M0680_1.02	[A/C/G/T]AATG[T/A]A[C/T]CT[A/C/G/T]	AT1G56045	2	-1000 bp to TSS	90	97	ATGAATCT
SLIM1 enriched binding motif (EBM)	M0680_1.02	[A/C/G/T]AATG[T/A]A[C/T]CT[A/C/G/T]	AT1G56045	2	-1000 bp to TSS	225	218	AGATTCAT
SLIM1 enriched binding motif (EBM)	M0680_1.02	[A/C/G/T]AATG[T/A]A[C/T]CT[A/C/G/T]	AT1G56345	2	-1000 bp to TSS	55	48	AGATTCAT
SLIM1 enriched binding motif (EBM)	M0680_1.02	[A/C/G/T]AATG[T/A]A[C/T]CT[A/C/G/T]	AT1G56345	2	-1000 bp to TSS	639	646	ATGAATCT
SLIM1 enriched binding motif (EBM)	M0680_1.02	[A/C/G/T]AATG[T/A]A[C/T]CT[A/C/G/T]	AT1G59885	2	-1000 bp to TSS	316	309	AGATTCAT
SLIM1 enriched binding motif (EBM)	M0680_1.02	[A/C/G/T]AATG[T/A]A[C/T]CT[A/C/G/T]	AT1G59885	2	-1000 bp to TSS	599	606	ATGAATCT
SLIM1 enriched binding motif (EBM)	M0680_1.02	[A/C/G/T]AATG[T/A]A[C/T]CT[A/C/G/T]	AT1G61250	2	-1000 bp to TSS	43	50	ATGAATCT
SLIM1 enriched binding motif (EBM)	M0680_1.02	[A/C/G/T]AATG[T/A]A[C/T]CT[A/C/G/T]	AT1G61250	2	-1000 bp to TSS	992	999	ATGAATCT
SLIM1 enriched binding motif (EBM)	M0680_1.02	[A/C/G/T]AATG[T/A]A[C/T]CT[A/C/G/T]	AT1G62000	2	-1000 bp to TSS	417	424	ATGAATCT
SLIM1 enriched binding motif (EBM)	M0680_1.02	[A/C/G/T]AATG[T/A]A[C/T]CT[A/C/G/T]	AT1G62000	2	-1000 bp to TSS	649	642	AGATTCAT
SLIM1 enriched binding motif (EBM)	M0680_1.02	[A/C/G/T]AATG[T/A]A[C/T]CT[A/C/G/T]	AT1G62080	2	-1000 bp to TSS	343	350	ATGAATCT
SLIM1 enriched binding motif (EBM)	M0680_1.02	[A/C/G/T]AATG[T/A]A[C/T]CT[A/C/G/T]	AT1G62080	2	-1000 bp to TSS	576	569	AGATTCAT
SLIM1 enriched binding motif (EBM)	M0680_1.02	[A/C/G/T]AATG[T/A]A[C/T]CT[A/C/G/T]	AT1G66070	2	-1000 bp to TSS	184	191	ATGAATCT
SLIM1 enriched binding motif (EBM)	M0680_1.02	[A/C/G/T]AATG[T/A]A[C/T]CT[A/C/G/T]	AT1G66070	2	-1000 bp to TSS	536	543	ATGAATCT
SLIM1 enriched binding motif (EBM)	M0680_1.02	[A/C/G/T]AATG[T/A]A[C/T]CT[A/C/G/T]	AT1G67300	2	-1000 bp to TSS	332	339	ATGAATCT
SLIM1 enriched binding motif (EBM)	M0680_1.02	[A/C/G/T]AATG[T/A]A[C/T]CT[A/C/G/T]	AT1G67300	2	-1000 bp to TSS	823	830	ATGAATCT
SLIM1 enriched binding motif (EBM)	M0680_1.02	[A/C/G/T]AATG[T/A]A[C/T]CT[A/C/G/T]	AT1G68300	2	-1000 bp to TSS	122	115	AGATTCAT
SLIM1 enriched binding motif (EBM)	M0680_1.02	[A/C/G/T]AATG[T/A]A[C/T]CT[A/C/G/T]	AT1G68300	2	-1000 bp to TSS	205	198	AGATTCAT
SLIM1 enriched binding motif (EBM)	M0680_1.02	[A/C/G/T]AATG[T/A]A[C/T]CT[A/C/G/T]	AT1G73600	2	-1000 bp to TSS	239	232	AGATTCAT
SLIM1 enriched binding motif (EBM)	M0680_1.02	[A/C/G/T]AATG[T/A]A[C/T]CT[A/C/G/T]	AT1G73600	2	-1000 bp to TSS	576	569	AGATTCAT
SLIM1 enriched binding motif (EBM)	M0680_1.02	[A/C/G/T]AATG[T/A]A[C/T]CT[A/C/G/T]	AT1G75394	2	-1000 bp to TSS	264	271	ATGAATCT
SLIM1 enriched binding motif (EBM)	M0680_1.02	[A/C/G/T]AATG[T/A]A[C/T]CT[A/C/G/T]	AT1G75394	2	-1000 bp to TSS	442	449	ATGAATCT
SLIM1 enriched binding motif (EBM)	M0680_1.02	[A/C/G/T]AATG[T/A]A[C/T]CT[A/C/G/T]	AT2G01170	2	-1000 bp to TSS	642	649	ATGAATCT
SLIM1 enriched binding motif (EBM)	M0680_1.02	[A/C/G/T]AATG[T/A]A[C/T]CT[A/C/G/T]	AT2G01170	2	-1000 bp to TSS	675	682	ATGAATCT
SLIM1 enriched binding motif (EBM)	M0680_1.02	[A/C/G/T]AATG[T/A]A[C/T]CT[A/C/G/T]	AT2G02040	2	-1000 bp to TSS	201	208	ATGAATCT
SLIM1 enriched binding motif (EBM)	M0680_1.02	[A/C/G/T]AATG[T/A]A[C/T]CT[A/C/G/T]	AT2G02040	2	-1000 bp to TSS	335	342	ATGAATCT
SLIM1 enriched binding motif (EBM)	M0680_1.02	[A/C/G/T]AATG[T/A]A[C/T]CT[A/C/G/T]	AT2G02520	2	-1000 bp to TSS	92	99	ATGAATCT
SLIM1 enriched binding motif (EBM)	M0680_1.02	[A/C/G/T]AATG[T/A]A[C/T]CT[A/C/G/T]	AT2G02520	2	-1000 bp to TSS	113	120	ATGAATCT
SLIM1 enriched binding motif (EBM)	M0680_1.02	[A/C/G/T]AATG[T/A]A[C/T]CT[A/C/G/T]	AT2G02795	2	-1000 bp to TSS	621	628	ATGAATCT
SLIM1 enriched binding motif (EBM)	M0680_1.02	[A/C/G/T]AATG[T/A]A[C/T]CT[A/C/G/T]	AT2G02795	2	-1000 bp to TSS	655	662	ATGAATCT
SLIM1 enriched binding motif (EBM)	M0680_1.02	[A/C/G/T]AATG[T/A]A[C/T]CT[A/C/G/T]	AT2G03730	2	-1000 bp to TSS	838	845	ATGAATCT
SLIM1 enriched binding motif (EBM)	M0680_1.02	[A/C/G/T]AATG[T/A]A[C/T]CT[A/C/G/T]	AT2G03730	2	-1000 bp to TSS	906	913	ATGAATCT
SLIM1 enriched binding motif (EBM)	M0680_1.02	[A/C/G/T]AATG[T/A]A[C/T]CT[A/C/G/T]	AT2G04225	2	-1000 bp to TSS	662	669	ATGAATCT
SLIM1 enriched binding motif (EBM)	M0680_1.02	[A/C/G/T]AATG[T/A]A[C/T]CT[A/C/G/T]	AT2G04225	2	-1000 bp to TSS	683	690	ATGAATCT
SLIM1 enriched binding motif (EBM)	M0680_1.02	[A/C/G/T]AATG[T/A]A[C/T]CT[A/C/G/T]	AT2G07661	2	-1000 bp to TSS	195	202	ATGAATCT
SLIM1 enriched binding motif (EBM)	M0680_1.02	[A/C/G/T]AATG[T/A]A[C/T]CT[A/C/G/T]	AT2G07661	2	-1000 bp to TSS	426	419	AGATTCAT
SLIM1 enriched binding motif (EBM)	M0680_1.02	[A/C/G/T]AATG[T/A]A[C/T]CT[A/C/G/T]	AT2G08435	2	-1000 bp to TSS	325	332	ATGAATCT
SLIM1 enriched binding motif (EBM)	M0680_1.02	[A/C/G/T]AATG[T/A]A[C/T]CT[A/C/G/T]	AT2G08435	2	-1000 bp to TSS	857	850	AGATTCAT
SLIM1 enriched binding motif (EBM)	M0680_1.02	[A/C/G/T]AATG[T/A]A[C/T]CT[A/C/G/T]	AT2G08690	2	-1000 bp to TSS	403	410	ATGAATCT
SLIM1 enriched binding motif (EBM)	M0680_1.02	[A/C/G/T]AATG[T/A]A[C/T]CT[A/C/G/T]	AT2G08690	2	-1000 bp to TSS	456	463	ATGAATCT
SLIM1 enriched binding motif (EBM)	M0680_1.02	[A/C/G/T]AATG[T/A]A[C/T]CT[A/C/G/T]	AT2G13547	2	-1000 bp to TSS	176	169	AGATTCAT
SLIM1 enriched binding motif (EBM)	M0680_1.02	[A/C/G/T]AATG[T/A]A[C/T]CT[A/C/G/T]	AT2G13547	2	-1000 bp to TSS	815	822	ATGAATCT
SLIM1 enriched binding motif (EBM)	M0680_1.02	[A/C/G/T]AATG[T/A]A[C/T]CT[A/C/G/T]	AT2G18860	2	-1000 bp to TSS	166	173	ATGAATCT
SLIM1 enriched binding motif (EBM)	M0680_1.02	[A/C/G/T]AATG[T/A]A[C/T]CT[A/C/G/T]	AT2G18860	2	-1000 bp to TSS	952	945	AGATTCAT
SLIM1 enriched binding motif (EBM)	M0680_1.02	[A/C/G/T]AATG[T/A]A[C/T]CT[A/C/G/T]	AT2G19780	2	-1000 bp to TSS	387	380	AGATTCAT
SLIM1 enriched binding motif (EBM)	M0680_1.02	[A/C/G/T]AATG[T/A]A[C/T]CT[A/C/G/T]	AT2G19780	2	-1000 bp to TSS	534	527	AGATTCAT
SLIM1 enriched binding motif (EBM)	M0680_1.02	[A/C/G/T]AATG[T/A]A[C/T]CT[A/C/G/T]	AT2G20890	2	-1000 bp to TSS	619	626	ATGAATCT
SLIM1 enriched binding motif (EBM)	M0680_1.02	[A/C/G/T]AATG[T/A]A[C/T]CT[A/C/G/T]	AT2G20890	2	-1000 bp to TSS	844	851	ATGAATCT
SLIM1 enriched binding motif (EBM)	M0680_1.02	[A/C/G/T]AATG[T/A]A[C/T]CT[A/C/G/T]	AT2G21080	2	-1000 bp to TSS	253	260	ATGAATCT
SLIM1 enriched binding motif (EBM)	M0680_1.02	[A/C/G/T]AATG[T/A]A[C/T]CT[A/C/G/T]	AT2G21080	2	-1000 bp to TSS	500	507	ATGAATCT
SLIM1 enriched binding motif (EBM)	M0680_1.02	[A/C/G/T]AATG[T/A]A[C/T]CT[A/C/G/T]	AT2G21490	2	-1000 bp to TSS	104	97	AGATTCAT
SLIM1 enriched binding motif (EBM)	M0680_1.02	[A/C/G/T]AATG[T/A]A[C/T]CT[A/C/G/T]	AT2G21490	2	-1000 bp to TSS	185	192	ATGAATCT
SLIM1 enriched binding motif (EBM)	M0680_1.02	[A/C/G/T]AATG[T/A]A[C/T]CT[A/C/G/T]	AT2G23945	2	-1000 bp to TSS	506	499	AGATTCAT
SLIM1 enriched binding motif (EBM)	M0680_1.02	[A/C/G/T]AATG[T/A]A[C/T]CT[A/C/G/T]	AT2G23945	2	-1000 bp to TSS	779	772	AGATTCAT
SLIM1 enriched binding motif (EBM)	M0680_1.02	[A/C/G/T]AATG[T/A]A[C/T]CT[A/C/G/T]	AT2G25300	2	-1000 bp to TSS	579	572	AGATTCAT
SLIM1 enriched binding motif (EBM)	M0680_1.02	[A/C/G/T]AATG[T/A]A[C/T]CT[A/C/G/T]	AT2G25300	2	-1000 bp to TSS	671	664	AGATTCAT
SLIM1 enriched binding motif (EBM)	M0680_1.02	[A/C/G/T]AATG[T/A]A[C/T]CT[A/C/G/T]	AT2G25530	2	-1000 bp to TSS	135	142	ATGAATCT
SLIM1 enriched binding motif (EBM)	M0680_1.02	[A/C/G/T]AATG[T/A]A[C/T]CT[A/C/G/T]	AT2G25530	2	-1000 bp to TSS	198	205	ATGAATCT
SLIM1 enriched binding motif (EBM)	M0680_1.02	[A/C/G/T]AATG[T/A]A[C/T]CT[A/C/G/T]	AT2G27300	2	-1000 bp to TSS	489	482	AGATTCAT
SLIM1 enriched binding motif (EBM)	M0680_1.02	[A/C/G/T]AATG[T/A]A[C/T]CT[A/C/G/T]	AT2G27300	2	-1000 bp to TSS	517	510	AGATTCAT
SLIM1 enriched binding motif (EBM)	M0680_1.02	[A/C/G/T]AATG[T/A]A[C/T]CT[A/C/G/T]	AT2G27950	2	-1000 bp to TSS	613	620	ATGAATCT
SLIM1 enriched binding motif (EBM)	M0680_1.02	[A/C/G/T]AATG[T/A]A[C/T]CT[A/C/G/T]	AT2G27950	2	-1000 bp to TSS	727	720	AGATTCAT
SLIM1 enriched binding motif (EBM)	M0680_1.02	[A/C/G/T]AATG[T/A]A[C/T]CT[A/C/G/T]	AT2G29360	2	-1000 bp to TSS	375	368	AGATTCAT
SLIM1 enriched binding motif (EBM)	M0680_1.02	[A/C/G/T]AATG[T/A]A[C/T]CT[A/C/G/T]	AT2G29360	2	-1000 bp to TSS	838	845	ATGAATCT
SLIM1 enriched binding motif (EBM)	M0680_1.02	[A/C/G/T]AATG[T/A]A[C/T]CT[A/C/G/T]	AT2G29530	2	-1000 bp to TSS	258	265	ATGAATCT
SLIM1 enriched binding motif (EBM)	M0680_1.02	[A/C/G/T]AATG[T/A]A[C/T]CT[A/C/G/T]	AT2G29530	2	-1000 bp to TSS	401	394	AGATTCAT
SLIM1 enriched binding motif (EBM)	M0680_1.02	[A/C/G/T]AATG[T/A]A[C/T]CT[A/C/G/T]	AT2G32315	2	-1000 bp to TSS	205	212	ATGAATCT
SLIM1 enriched binding motif (EBM)	M0680_1.02	[A/C/G/T]AATG[T/A]A[C/T]CT[A/C/G/T]	AT2G32315	2	-1000 bp to TSS	576	569	AGATTCAT
SLIM1 enriched binding motif (EBM)	M0680_1.02	[A/C/G/T]AATG[T/A]A[C/T]CT[A/C/G/T]	AT2G33580	2	-1000 bp to TSS	554	547	AGATTCAT
SLIM1 enriched binding motif (EBM)	M0680_1.02	[A/C/G/T]AATG[T/A]A[C/T]CT[A/C/G/T]	AT2G33580	2	-1000 bp to TSS	863	870	ATGAATCT
SLIM1 enriched binding motif (EBM)	M0680_1.02	[A/C/G/T]AATG[T/A]A[C/T]CT[A/C/G/T]	AT2G33707	2	-1000 bp to TSS	122	115	AGATTCAT
SLIM1 enriched binding motif (EBM)	M0680_1.02	[A/C/G/T]AATG[T/A]A[C/T]CT[A/C/G/T]	AT2G33707	2	-1000 bp to TSS	669	662	AGATTCAT
SLIM1 enriched binding motif (EBM)	M0680_1.02	[A/C/G/T]AATG[T/A]A[C/T]CT[A/C/G/T]	AT2G34660	2	-1000 bp to TSS	633	640	ATGAATCT
SLIM1 enriched binding motif (EBM)	M0680_1.02	[A/C/G/T]AATG[T/A]A[C/T]CT[A/C/G/T]	AT2G34660	2	-1000 bp to TSS	690	683	AGATTCAT
SLIM1 enriched binding motif (EBM)	M0680_1.02	[A/C/G/T]AATG[T/A]A[C/T]CT[A/C/G/T]	AT2G35382	2	-1000 bp to TSS	836	843	ATGAATCT
SLIM1 enriched binding motif (EBM)	M0680_1.02	[A/C/G/T]AATG[T/A]A[C/T]CT[A/C/G/T]	AT2G35382	2	-1000 bp to TSS	918	911	AGATTCAT
SLIM1 enriched binding motif (EBM)	M0680_1.02	[A/C/G/T]AATG[T/A]A[C/T]CT[A/C/G/T]	AT2G35410	2	-1000 bp to TSS	169	162	AGATTCAT
SLIM1 enriched binding motif (EBM)	M0680_1.02	[A/C/G/T]AATG[T/A]A[C/T]CT[A/C/G/T]	AT2G35410	2	-1000 bp to TSS	859	852	AGATTCAT
SLIM1 enriched binding motif (EBM)	M0680_1.02	[A/C/G/T]AATG[T/A]A[C/T]CT[A/C/G/T]	AT2G37090	2	-1000 bp to TSS	837	844	ATGAATCT
SLIM1 enriched binding motif (EBM)	M0680_1.02	[A/C/G/T]AATG[T/A]A[C/T]CT[A/C/G/T]	AT2G37090	2	-1000 bp to TSS	864	857	AGATTCAT
SLIM1 enriched binding motif (EBM)	M0680_1.02	[A/C/G/T]AATG[T/A]A[C/T]CT[A/C/G/T]	AT2G39860	2	-1000 bp to TSS	133	140	ATGAATCT
SLIM1 enriched binding motif (EBM)	M0680_1.02	[A/C/G/T]AATG[T/A]A[C/T]CT[A/C/G/T]	AT2G39860	2	-1000 bp to TSS	713	720	ATGAATCT
SLIM1 enriched binding motif (EBM)	M0680_1.02	[A/C/G/T]AATG[T/A]A[C/T]CT[A/C/G/T]	AT2G41417	2	-1000 bp to TSS	638	631	AGATTCAT
SLIM1 enriched binding motif (EBM)	M0680_1.02	[A/C/G/T]AATG[T/A]A[C/T]CT[A/C/G/T]	AT2G41417	2	-1000 bp to TSS	798	791	AGATTCAT
SLIM1 enriched binding motif (EBM)	M0680_1.02	[A/C/G/T]AATG[T/A]A[C/T]CT[A/C/G/T]	AT2G44840	2	-1000 bp to TSS	225	232	ATGAATCT
SLIM1 enriched binding motif (EBM)	M0680_1.02	[A/C/G/T]AATG[T/A]A[C/T]CT[A/C/G/T]	AT2G44840	2	-1000 bp to TSS	476	483	ATGAATCT
SLIM1 enriched binding motif (EBM)	M0680_1.02	[A/C/G/T]AATG[T/A]A[C/T]CT[A/C/G/T]	AT2G46494	2	-1000 bp to TSS	437	444	ATGAATCT
SLIM1 enriched binding motif (EBM)	M0680_1.02	[A/C/G/T]AATG[T/A]A[C/T]CT[A/C/G/T]	AT2G46494	2	-1000 bp to TSS	624	617	AGATTCAT
SLIM1 enriched binding motif (EBM)	M0680_1.02	[A/C/G/T]AATG[T/A]A[C/T]CT[A/C/G/T]	AT3G02640	2	-1000 bp to TSS	120	127	ATGAATCT
SLIM1 enriched binding motif (EBM)	M0680_1.02	[A/C/G/T]AATG[T/A]A[C/T]CT[A/C/G/T]	AT3G02640	2	-1000 bp to TSS	354	361	ATGAATCT
SLIM1 enriched binding motif (EBM)	M0680_1.02	[A/C/G/T]AATG[T/A]A[C/T]CT[A/C/G/T]	AT3G03570	2	-1000 bp to TSS	207	200	AGATTCAT
SLIM1 enriched binding motif (EBM)	M0680_1.02	[A/C/G/T]AATG[T/A]A[C/T]CT[A/C/G/T]	AT3G03570	2	-1000 bp to TSS	279	286	ATGAATCT
SLIM1 enriched binding motif (EBM)	M0680_1.02	[A/C/G/T]AATG[T/A]A[C/T]CT[A/C/G/T]	AT3G03610	2	-1000 bp to TSS	475	468	AGATTCAT
SLIM1 enriched binding motif (EBM)	M0680_1.02	[A/C/G/T]AATG[T/A]A[C/T]CT[A/C/G/T]	AT3G03610	2	-1000 bp to TSS	866	873	ATGAATCT
SLIM1 enriched binding motif (EBM)	M0680_1.02	[A/C/G/T]AATG[T/A]A[C/T]CT[A/C/G/T]	AT3G04200	2	-1000 bp to TSS	279	286	ATGAATCT
SLIM1 enriched binding motif (EBM)	M0680_1.02	[A/C/G/T]AATG[T/A]A[C/T]CT[A/C/G/T]	AT3G04200	2	-1000 bp to TSS	947	954	ATGAATCT
SLIM1 enriched binding motif (EBM)	M0680_1.02	[A/C/G/T]AATG[T/A]A[C/T]CT[A/C/G/T]	AT3G04715	2	-1000 bp to TSS	28	35	ATGAATCT
SLIM1 enriched binding motif (EBM)	M0680_1.02	[A/C/G/T]AATG[T/A]A[C/T]CT[A/C/G/T]	AT3G04715	2	-1000 bp to TSS	250	257	ATGAATCT
SLIM1 enriched binding motif (EBM)	M0680_1.02	[A/C/G/T]AATG[T/A]A[C/T]CT[A/C/G/T]	AT3G07915	2	-1000 bp to TSS	179	186	ATGAATCT
SLIM1 enriched binding motif (EBM)	M0680_1.02	[A/C/G/T]AATG[T/A]A[C/T]CT[A/C/G/T]	AT3G07915	2	-1000 bp to TSS	762	769	ATGAATCT
SLIM1 enriched binding motif (EBM)	M0680_1.02	[A/C/G/T]AATG[T/A]A[C/T]CT[A/C/G/T]	AT3G12915	2	-1000 bp to TSS	366	359	AGATTCAT
SLIM1 enriched binding motif (EBM)	M0680_1.02	[A/C/G/T]AATG[T/A]A[C/T]CT[A/C/G/T]	AT3G12915	2	-1000 bp to TSS	412	419	ATGAATCT
SLIM1 enriched binding motif (EBM)	M0680_1.02	[A/C/G/T]AATG[T/A]A[C/T]CT[A/C/G/T]	AT3G13080	2	-1000 bp to TSS	162	169	ATGAATCT
SLIM1 enriched binding motif (EBM)	M0680_1.02	[A/C/G/T]AATG[T/A]A[C/T]CT[A/C/G/T]	AT3G13080	2	-1000 bp to TSS	534	527	AGATTCAT
SLIM1 enriched binding motif (EBM)	M0680_1.02	[A/C/G/T]AATG[T/A]A[C/T]CT[A/C/G/T]	AT3G14600	2	-1000 bp to TSS	330	323	AGATTCAT
SLIM1 enriched binding motif (EBM)	M0680_1.02	[A/C/G/T]AATG[T/A]A[C/T]CT[A/C/G/T]	AT3G14600	2	-1000 bp to TSS	819	826	ATGAATCT
SLIM1 enriched binding motif (EBM)	M0680_1.02	[A/C/G/T]AATG[T/A]A[C/T]CT[A/C/G/T]	AT3G16140	2	-1000 bp to TSS	267	260	AGATTCAT
SLIM1 enriched binding motif (EBM)	M0680_1.02	[A/C/G/T]AATG[T/A]A[C/T]CT[A/C/G/T]	AT3G16140	2	-1000 bp to TSS	274	281	ATGAATCT
SLIM1 enriched binding motif (EBM)	M0680_1.02	[A/C/G/T]AATG[T/A]A[C/T]CT[A/C/G/T]	AT3G17380	2	-1000 bp to TSS	80	73	AGATTCAT
SLIM1 enriched binding motif (EBM)	M0680_1.02	[A/C/G/T]AATG[T/A]A[C/T]CT[A/C/G/T]	AT3G17380	2	-1000 bp to TSS	972	965	AGATTCAT
SLIM1 enriched binding motif (EBM)	M0680_1.02	[A/C/G/T]AATG[T/A]A[C/T]CT[A/C/G/T]	AT3G18010	2	-1000 bp to TSS	653	660	ATGAATCT
SLIM1 enriched binding motif (EBM)	M0680_1.02	[A/C/G/T]AATG[T/A]A[C/T]CT[A/C/G/T]	AT3G18010	2	-1000 bp to TSS	680	687	ATGAATCT
SLIM1 enriched binding motif (EBM)	M0680_1.02	[A/C/G/T]AATG[T/A]A[C/T]CT[A/C/G/T]	AT3G18518	2	-1000 bp to TSS	703	710	ATGAATCT
SLIM1 enriched binding motif (EBM)	M0680_1.02	[A/C/G/T]AATG[T/A]A[C/T]CT[A/C/G/T]	AT3G18518	2	-1000 bp to TSS	893	900	ATGAATCT
SLIM1 enriched binding motif (EBM)	M0680_1.02	[A/C/G/T]AATG[T/A]A[C/T]CT[A/C/G/T]	AT3G19470	2	-1000 bp to TSS	749	742	AGATTCAT
SLIM1 enriched binding motif (EBM)	M0680_1.02	[A/C/G/T]AATG[T/A]A[C/T]CT[A/C/G/T]	AT3G19470	2	-1000 bp to TSS	825	832	ATGAATCT
SLIM1 enriched binding motif (EBM)	M0680_1.02	[A/C/G/T]AATG[T/A]A[C/T]CT[A/C/G/T]	AT3G20083	2	-1000 bp to TSS	460	453	AGATTCAT
SLIM1 enriched binding motif (EBM)	M0680_1.02	[A/C/G/T]AATG[T/A]A[C/T]CT[A/C/G/T]	AT3G20083	2	-1000 bp to TSS	936	929	AGATTCAT
SLIM1 enriched binding motif (EBM)	M0680_1.02	[A/C/G/T]AATG[T/A]A[C/T]CT[A/C/G/T]	AT3G20978	2	-1000 bp to TSS	642	635	AGATTCAT
SLIM1 enriched binding motif (EBM)	M0680_1.02	[A/C/G/T]AATG[T/A]A[C/T]CT[A/C/G/T]	AT3G20978	2	-1000 bp to TSS	689	696	ATGAATCT
SLIM1 enriched binding motif (EBM)	M0680_1.02	[A/C/G/T]AATG[T/A]A[C/T]CT[A/C/G/T]	AT3G20980	2	-1000 bp to TSS	689	682	AGATTCAT
SLIM1 enriched binding motif (EBM)	M0680_1.02	[A/C/G/T]AATG[T/A]A[C/T]CT[A/C/G/T]	AT3G20980	2	-1000 bp to TSS	736	743	ATGAATCT
SLIM1 enriched binding motif (EBM)	M0680_1.02	[A/C/G/T]AATG[T/A]A[C/T]CT[A/C/G/T]	AT3G22110	2	-1000 bp to TSS	833	840	ATGAATCT
SLIM1 enriched binding motif (EBM)	M0680_1.02	[A/C/G/T]AATG[T/A]A[C/T]CT[A/C/G/T]	AT3G22110	2	-1000 bp to TSS	861	868	ATGAATCT
SLIM1 enriched binding motif (EBM)	M0680_1.02	[A/C/G/T]AATG[T/A]A[C/T]CT[A/C/G/T]	AT3G22121	2	-1000 bp to TSS	447	440	AGATTCAT
SLIM1 enriched binding motif (EBM)	M0680_1.02	[A/C/G/T]AATG[T/A]A[C/T]CT[A/C/G/T]	AT3G22121	2	-1000 bp to TSS	475	468	AGATTCAT
SLIM1 enriched binding motif (EBM)	M0680_1.02	[A/C/G/T]AATG[T/A]A[C/T]CT[A/C/G/T]	AT3G23150	2	-1000 bp to TSS	357	350	AGATTCAT
SLIM1 enriched binding motif (EBM)	M0680_1.02	[A/C/G/T]AATG[T/A]A[C/T]CT[A/C/G/T]	AT3G23150	2	-1000 bp to TSS	688	681	AGATTCAT
SLIM1 enriched binding motif (EBM)	M0680_1.02	[A/C/G/T]AATG[T/A]A[C/T]CT[A/C/G/T]	AT3G27580	2	-1000 bp to TSS	63	56	AGATTCAT
SLIM1 enriched binding motif (EBM)	M0680_1.02	[A/C/G/T]AATG[T/A]A[C/T]CT[A/C/G/T]	AT3G27580	2	-1000 bp to TSS	994	987	AGATTCAT
SLIM1 enriched binding motif (EBM)	M0680_1.02	[A/C/G/T]AATG[T/A]A[C/T]CT[A/C/G/T]	AT3G29644	2	-1000 bp to TSS	163	156	AGATTCAT
SLIM1 enriched binding motif (EBM)	M0680_1.02	[A/C/G/T]AATG[T/A]A[C/T]CT[A/C/G/T]	AT3G29644	2	-1000 bp to TSS	576	583	ATGAATCT
SLIM1 enriched binding motif (EBM)	M0680_1.02	[A/C/G/T]AATG[T/A]A[C/T]CT[A/C/G/T]	AT3G43840	2	-1000 bp to TSS	707	700	AGATTCAT
SLIM1 enriched binding motif (EBM)	M0680_1.02	[A/C/G/T]AATG[T/A]A[C/T]CT[A/C/G/T]	AT3G43840	2	-1000 bp to TSS	891	898	ATGAATCT
SLIM1 enriched binding motif (EBM)	M0680_1.02	[A/C/G/T]AATG[T/A]A[C/T]CT[A/C/G/T]	AT3G43910	2	-1000 bp to TSS	13	20	ATGAATCT
SLIM1 enriched binding motif (EBM)	M0680_1.02	[A/C/G/T]AATG[T/A]A[C/T]CT[A/C/G/T]	AT3G43910	2	-1000 bp to TSS	735	742	ATGAATCT
SLIM1 enriched binding motif (EBM)	M0680_1.02	[A/C/G/T]AATG[T/A]A[C/T]CT[A/C/G/T]	AT3G43920	2	-1000 bp to TSS	67	74	ATGAATCT
SLIM1 enriched binding motif (EBM)	M0680_1.02	[A/C/G/T]AATG[T/A]A[C/T]CT[A/C/G/T]	AT3G43920	2	-1000 bp to TSS	850	857	ATGAATCT
SLIM1 enriched binding motif (EBM)	M0680_1.02	[A/C/G/T]AATG[T/A]A[C/T]CT[A/C/G/T]	AT3G45790	2	-1000 bp to TSS	239	246	ATGAATCT
SLIM1 enriched binding motif (EBM)	M0680_1.02	[A/C/G/T]AATG[T/A]A[C/T]CT[A/C/G/T]	AT3G45790	2	-1000 bp to TSS	734	727	AGATTCAT
SLIM1 enriched binding motif (EBM)	M0680_1.02	[A/C/G/T]AATG[T/A]A[C/T]CT[A/C/G/T]	AT3G48440	2	-1000 bp to TSS	646	653	ATGAATCT
SLIM1 enriched binding motif (EBM)	M0680_1.02	[A/C/G/T]AATG[T/A]A[C/T]CT[A/C/G/T]	AT3G48440	2	-1000 bp to TSS	933	926	AGATTCAT
SLIM1 enriched binding motif (EBM)	M0680_1.02	[A/C/G/T]AATG[T/A]A[C/T]CT[A/C/G/T]	AT3G49307	2	-1000 bp to TSS	274	281	ATGAATCT
SLIM1 enriched binding motif (EBM)	M0680_1.02	[A/C/G/T]AATG[T/A]A[C/T]CT[A/C/G/T]	AT3G49307	2	-1000 bp to TSS	354	361	ATGAATCT
SLIM1 enriched binding motif (EBM)	M0680_1.02	[A/C/G/T]AATG[T/A]A[C/T]CT[A/C/G/T]	AT3G52210	2	-1000 bp to TSS	131	138	ATGAATCT
SLIM1 enriched binding motif (EBM)	M0680_1.02	[A/C/G/T]AATG[T/A]A[C/T]CT[A/C/G/T]	AT3G52210	2	-1000 bp to TSS	867	874	ATGAATCT
SLIM1 enriched binding motif (EBM)	M0680_1.02	[A/C/G/T]AATG[T/A]A[C/T]CT[A/C/G/T]	AT3G52500	2	-1000 bp to TSS	428	421	AGATTCAT
SLIM1 enriched binding motif (EBM)	M0680_1.02	[A/C/G/T]AATG[T/A]A[C/T]CT[A/C/G/T]	AT3G52500	2	-1000 bp to TSS	552	559	ATGAATCT
SLIM1 enriched binding motif (EBM)	M0680_1.02	[A/C/G/T]AATG[T/A]A[C/T]CT[A/C/G/T]	AT3G55630	2	-1000 bp to TSS	10	3	AGATTCAT
SLIM1 enriched binding motif (EBM)	M0680_1.02	[A/C/G/T]AATG[T/A]A[C/T]CT[A/C/G/T]	AT3G55630	2	-1000 bp to TSS	144	151	ATGAATCT
SLIM1 enriched binding motif (EBM)	M0680_1.02	[A/C/G/T]AATG[T/A]A[C/T]CT[A/C/G/T]	AT3G56630	2	-1000 bp to TSS	154	161	ATGAATCT
SLIM1 enriched binding motif (EBM)	M0680_1.02	[A/C/G/T]AATG[T/A]A[C/T]CT[A/C/G/T]	AT3G56630	2	-1000 bp to TSS	276	269	AGATTCAT
SLIM1 enriched binding motif (EBM)	M0680_1.02	[A/C/G/T]AATG[T/A]A[C/T]CT[A/C/G/T]	AT3G58710	2	-1000 bp to TSS	129	122	AGATTCAT
SLIM1 enriched binding motif (EBM)	M0680_1.02	[A/C/G/T]AATG[T/A]A[C/T]CT[A/C/G/T]	AT3G58710	2	-1000 bp to TSS	163	156	AGATTCAT
SLIM1 enriched binding motif (EBM)	M0680_1.02	[A/C/G/T]AATG[T/A]A[C/T]CT[A/C/G/T]	AT3G60286	2	-1000 bp to TSS	135	142	ATGAATCT
SLIM1 enriched binding motif (EBM)	M0680_1.02	[A/C/G/T]AATG[T/A]A[C/T]CT[A/C/G/T]	AT3G60286	2	-1000 bp to TSS	334	341	ATGAATCT
SLIM1 enriched binding motif (EBM)	M0680_1.02	[A/C/G/T]AATG[T/A]A[C/T]CT[A/C/G/T]	AT3G60300	2	-1000 bp to TSS	249	242	AGATTCAT
SLIM1 enriched binding motif (EBM)	M0680_1.02	[A/C/G/T]AATG[T/A]A[C/T]CT[A/C/G/T]	AT3G60300	2	-1000 bp to TSS	448	441	AGATTCAT
SLIM1 enriched binding motif (EBM)	M0680_1.02	[A/C/G/T]AATG[T/A]A[C/T]CT[A/C/G/T]	AT3G61080	2	-1000 bp to TSS	107	100	AGATTCAT
SLIM1 enriched binding motif (EBM)	M0680_1.02	[A/C/G/T]AATG[T/A]A[C/T]CT[A/C/G/T]	AT3G61080	2	-1000 bp to TSS	140	147	ATGAATCT
SLIM1 enriched binding motif (EBM)	M0680_1.02	[A/C/G/T]AATG[T/A]A[C/T]CT[A/C/G/T]	AT3G62310	2	-1000 bp to TSS	540	547	ATGAATCT
SLIM1 enriched binding motif (EBM)	M0680_1.02	[A/C/G/T]AATG[T/A]A[C/T]CT[A/C/G/T]	AT3G62310	2	-1000 bp to TSS	659	666	ATGAATCT
SLIM1 enriched binding motif (EBM)	M0680_1.02	[A/C/G/T]AATG[T/A]A[C/T]CT[A/C/G/T]	AT4G00695	2	-1000 bp to TSS	282	289	ATGAATCT
SLIM1 enriched binding motif (EBM)	M0680_1.02	[A/C/G/T]AATG[T/A]A[C/T]CT[A/C/G/T]	AT4G00695	2	-1000 bp to TSS	910	917	ATGAATCT
SLIM1 enriched binding motif (EBM)	M0680_1.02	[A/C/G/T]AATG[T/A]A[C/T]CT[A/C/G/T]	AT4G02290	2	-1000 bp to TSS	312	305	AGATTCAT
SLIM1 enriched binding motif (EBM)	M0680_1.02	[A/C/G/T]AATG[T/A]A[C/T]CT[A/C/G/T]	AT4G02290	2	-1000 bp to TSS	787	794	ATGAATCT
SLIM1 enriched binding motif (EBM)	M0680_1.02	[A/C/G/T]AATG[T/A]A[C/T]CT[A/C/G/T]	AT4G02750	2	-1000 bp to TSS	112	105	AGATTCAT
SLIM1 enriched binding motif (EBM)	M0680_1.02	[A/C/G/T]AATG[T/A]A[C/T]CT[A/C/G/T]	AT4G02750	2	-1000 bp to TSS	130	123	AGATTCAT
SLIM1 enriched binding motif (EBM)	M0680_1.02	[A/C/G/T]AATG[T/A]A[C/T]CT[A/C/G/T]	AT4G08215	2	-1000 bp to TSS	447	454	ATGAATCT
SLIM1 enriched binding motif (EBM)	M0680_1.02	[A/C/G/T]AATG[T/A]A[C/T]CT[A/C/G/T]	AT4G08215	2	-1000 bp to TSS	563	570	ATGAATCT
SLIM1 enriched binding motif (EBM)	M0680_1.02	[A/C/G/T]AATG[T/A]A[C/T]CT[A/C/G/T]	AT4G09815	2	-1000 bp to TSS	735	742	ATGAATCT
SLIM1 enriched binding motif (EBM)	M0680_1.02	[A/C/G/T]AATG[T/A]A[C/T]CT[A/C/G/T]	AT4G09815	2	-1000 bp to TSS	815	822	ATGAATCT
SLIM1 enriched binding motif (EBM)	M0680_1.02	[A/C/G/T]AATG[T/A]A[C/T]CT[A/C/G/T]	AT4G11810	2	-1000 bp to TSS	76	69	AGATTCAT
SLIM1 enriched binding motif (EBM)	M0680_1.02	[A/C/G/T]AATG[T/A]A[C/T]CT[A/C/G/T]	AT4G11810	2	-1000 bp to TSS	938	945	ATGAATCT
SLIM1 enriched binding motif (EBM)	M0680_1.02	[A/C/G/T]AATG[T/A]A[C/T]CT[A/C/G/T]	AT4G14358	2	-1000 bp to TSS	320	327	ATGAATCT
SLIM1 enriched binding motif (EBM)	M0680_1.02	[A/C/G/T]AATG[T/A]A[C/T]CT[A/C/G/T]	AT4G14358	2	-1000 bp to TSS	924	917	AGATTCAT
SLIM1 enriched binding motif (EBM)	M0680_1.02	[A/C/G/T]AATG[T/A]A[C/T]CT[A/C/G/T]	AT4G14420	2	-1000 bp to TSS	688	695	ATGAATCT
SLIM1 enriched binding motif (EBM)	M0680_1.02	[A/C/G/T]AATG[T/A]A[C/T]CT[A/C/G/T]	AT4G14420	2	-1000 bp to TSS	750	743	AGATTCAT
SLIM1 enriched binding motif (EBM)	M0680_1.02	[A/C/G/T]AATG[T/A]A[C/T]CT[A/C/G/T]	AT4G18390	2	-1000 bp to TSS	13	6	AGATTCAT
SLIM1 enriched binding motif (EBM)	M0680_1.02	[A/C/G/T]AATG[T/A]A[C/T]CT[A/C/G/T]	AT4G18390	2	-1000 bp to TSS	424	431	ATGAATCT
SLIM1 enriched binding motif (EBM)	M0680_1.02	[A/C/G/T]AATG[T/A]A[C/T]CT[A/C/G/T]	AT4G26240	2	-1000 bp to TSS	629	636	ATGAATCT
SLIM1 enriched binding motif (EBM)	M0680_1.02	[A/C/G/T]AATG[T/A]A[C/T]CT[A/C/G/T]	AT4G26240	2	-1000 bp to TSS	720	727	ATGAATCT
SLIM1 enriched binding motif (EBM)	M0680_1.02	[A/C/G/T]AATG[T/A]A[C/T]CT[A/C/G/T]	AT4G26250	2	-1000 bp to TSS	698	691	AGATTCAT
SLIM1 enriched binding motif (EBM)	M0680_1.02	[A/C/G/T]AATG[T/A]A[C/T]CT[A/C/G/T]	AT4G26250	2	-1000 bp to TSS	789	782	AGATTCAT
SLIM1 enriched binding motif (EBM)	M0680_1.02	[A/C/G/T]AATG[T/A]A[C/T]CT[A/C/G/T]	AT4G27050	2	-1000 bp to TSS	45	52	ATGAATCT
SLIM1 enriched binding motif (EBM)	M0680_1.02	[A/C/G/T]AATG[T/A]A[C/T]CT[A/C/G/T]	AT4G27050	2	-1000 bp to TSS	433	426	AGATTCAT
SLIM1 enriched binding motif (EBM)	M0680_1.02	[A/C/G/T]AATG[T/A]A[C/T]CT[A/C/G/T]	AT4G27052	2	-1000 bp to TSS	550	557	ATGAATCT
SLIM1 enriched binding motif (EBM)	M0680_1.02	[A/C/G/T]AATG[T/A]A[C/T]CT[A/C/G/T]	AT4G27052	2	-1000 bp to TSS	938	931	AGATTCAT
SLIM1 enriched binding motif (EBM)	M0680_1.02	[A/C/G/T]AATG[T/A]A[C/T]CT[A/C/G/T]	AT4G29200	2	-1000 bp to TSS	760	753	AGATTCAT
SLIM1 enriched binding motif (EBM)	M0680_1.02	[A/C/G/T]AATG[T/A]A[C/T]CT[A/C/G/T]	AT4G29200	2	-1000 bp to TSS	791	784	AGATTCAT
SLIM1 enriched binding motif (EBM)	M0680_1.02	[A/C/G/T]AATG[T/A]A[C/T]CT[A/C/G/T]	AT4G29210	2	-1000 bp to TSS	489	496	ATGAATCT
SLIM1 enriched binding motif (EBM)	M0680_1.02	[A/C/G/T]AATG[T/A]A[C/T]CT[A/C/G/T]	AT4G29210	2	-1000 bp to TSS	520	527	ATGAATCT
SLIM1 enriched binding motif (EBM)	M0680_1.02	[A/C/G/T]AATG[T/A]A[C/T]CT[A/C/G/T]	AT4G29760	2	-1000 bp to TSS	171	178	ATGAATCT
SLIM1 enriched binding motif (EBM)	M0680_1.02	[A/C/G/T]AATG[T/A]A[C/T]CT[A/C/G/T]	AT4G29760	2	-1000 bp to TSS	287	294	ATGAATCT
SLIM1 enriched binding motif (EBM)	M0680_1.02	[A/C/G/T]AATG[T/A]A[C/T]CT[A/C/G/T]	AT4G31075	2	-1000 bp to TSS	64	71	ATGAATCT
SLIM1 enriched binding motif (EBM)	M0680_1.02	[A/C/G/T]AATG[T/A]A[C/T]CT[A/C/G/T]	AT4G31075	2	-1000 bp to TSS	775	782	ATGAATCT
SLIM1 enriched binding motif (EBM)	M0680_1.02	[A/C/G/T]AATG[T/A]A[C/T]CT[A/C/G/T]	AT4G32342	2	-1000 bp to TSS	308	301	AGATTCAT
SLIM1 enriched binding motif (EBM)	M0680_1.02	[A/C/G/T]AATG[T/A]A[C/T]CT[A/C/G/T]	AT4G32342	2	-1000 bp to TSS	577	570	AGATTCAT
SLIM1 enriched binding motif (EBM)	M0680_1.02	[A/C/G/T]AATG[T/A]A[C/T]CT[A/C/G/T]	AT4G32350	2	-1000 bp to TSS	446	453	ATGAATCT
SLIM1 enriched binding motif (EBM)	M0680_1.02	[A/C/G/T]AATG[T/A]A[C/T]CT[A/C/G/T]	AT4G32350	2	-1000 bp to TSS	715	722	ATGAATCT
SLIM1 enriched binding motif (EBM)	M0680_1.02	[A/C/G/T]AATG[T/A]A[C/T]CT[A/C/G/T]	AT4G35785	2	-1000 bp to TSS	403	396	AGATTCAT
SLIM1 enriched binding motif (EBM)	M0680_1.02	[A/C/G/T]AATG[T/A]A[C/T]CT[A/C/G/T]	AT4G35785	2	-1000 bp to TSS	920	913	AGATTCAT
SLIM1 enriched binding motif (EBM)	M0680_1.02	[A/C/G/T]AATG[T/A]A[C/T]CT[A/C/G/T]	AT4G38020	2	-1000 bp to TSS	441	448	ATGAATCT
SLIM1 enriched binding motif (EBM)	M0680_1.02	[A/C/G/T]AATG[T/A]A[C/T]CT[A/C/G/T]	AT4G38020	2	-1000 bp to TSS	929	922	AGATTCAT
SLIM1 enriched binding motif (EBM)	M0680_1.02	[A/C/G/T]AATG[T/A]A[C/T]CT[A/C/G/T]	AT5G01435	2	-1000 bp to TSS	836	829	AGATTCAT
SLIM1 enriched binding motif (EBM)	M0680_1.02	[A/C/G/T]AATG[T/A]A[C/T]CT[A/C/G/T]	AT5G01435	2	-1000 bp to TSS	918	911	AGATTCAT
SLIM1 enriched binding motif (EBM)	M0680_1.02	[A/C/G/T]AATG[T/A]A[C/T]CT[A/C/G/T]	AT5G06260	2	-1000 bp to TSS	124	131	ATGAATCT
SLIM1 enriched binding motif (EBM)	M0680_1.02	[A/C/G/T]AATG[T/A]A[C/T]CT[A/C/G/T]	AT5G06260	2	-1000 bp to TSS	913	920	ATGAATCT
SLIM1 enriched binding motif (EBM)	M0680_1.02	[A/C/G/T]AATG[T/A]A[C/T]CT[A/C/G/T]	AT5G06720	2	-1000 bp to TSS	80	73	AGATTCAT
SLIM1 enriched binding motif (EBM)	M0680_1.02	[A/C/G/T]AATG[T/A]A[C/T]CT[A/C/G/T]	AT5G06720	2	-1000 bp to TSS	245	238	AGATTCAT
SLIM1 enriched binding motif (EBM)	M0680_1.02	[A/C/G/T]AATG[T/A]A[C/T]CT[A/C/G/T]	AT5G07152	2	-1000 bp to TSS	104	97	AGATTCAT
SLIM1 enriched binding motif (EBM)	M0680_1.02	[A/C/G/T]AATG[T/A]A[C/T]CT[A/C/G/T]	AT5G07152	2	-1000 bp to TSS	864	871	ATGAATCT
SLIM1 enriched binding motif (EBM)	M0680_1.02	[A/C/G/T]AATG[T/A]A[C/T]CT[A/C/G/T]	AT5G07625	2	-1000 bp to TSS	679	686	ATGAATCT
SLIM1 enriched binding motif (EBM)	M0680_1.02	[A/C/G/T]AATG[T/A]A[C/T]CT[A/C/G/T]	AT5G07625	2	-1000 bp to TSS	832	839	ATGAATCT
SLIM1 enriched binding motif (EBM)	M0680_1.02	[A/C/G/T]AATG[T/A]A[C/T]CT[A/C/G/T]	AT5G08445	2	-1000 bp to TSS	562	569	ATGAATCT
SLIM1 enriched binding motif (EBM)	M0680_1.02	[A/C/G/T]AATG[T/A]A[C/T]CT[A/C/G/T]	AT5G08445	2	-1000 bp to TSS	788	795	ATGAATCT
SLIM1 enriched binding motif (EBM)	M0680_1.02	[A/C/G/T]AATG[T/A]A[C/T]CT[A/C/G/T]	AT5G09225	2	-1000 bp to TSS	692	699	ATGAATCT
SLIM1 enriched binding motif (EBM)	M0680_1.02	[A/C/G/T]AATG[T/A]A[C/T]CT[A/C/G/T]	AT5G09225	2	-1000 bp to TSS	739	746	ATGAATCT
SLIM1 enriched binding motif (EBM)	M0680_1.02	[A/C/G/T]AATG[T/A]A[C/T]CT[A/C/G/T]	AT5G09400	2	-1000 bp to TSS	229	236	ATGAATCT
SLIM1 enriched binding motif (EBM)	M0680_1.02	[A/C/G/T]AATG[T/A]A[C/T]CT[A/C/G/T]	AT5G09400	2	-1000 bp to TSS	330	337	ATGAATCT
SLIM1 enriched binding motif (EBM)	M0680_1.02	[A/C/G/T]AATG[T/A]A[C/T]CT[A/C/G/T]	AT5G12210	2	-1000 bp to TSS	50	43	AGATTCAT
SLIM1 enriched binding motif (EBM)	M0680_1.02	[A/C/G/T]AATG[T/A]A[C/T]CT[A/C/G/T]	AT5G12210	2	-1000 bp to TSS	92	85	AGATTCAT
SLIM1 enriched binding motif (EBM)	M0680_1.02	[A/C/G/T]AATG[T/A]A[C/T]CT[A/C/G/T]	AT5G13845	2	-1000 bp to TSS	116	123	ATGAATCT
SLIM1 enriched binding motif (EBM)	M0680_1.02	[A/C/G/T]AATG[T/A]A[C/T]CT[A/C/G/T]	AT5G13845	2	-1000 bp to TSS	511	518	ATGAATCT
SLIM1 enriched binding motif (EBM)	M0680_1.02	[A/C/G/T]AATG[T/A]A[C/T]CT[A/C/G/T]	AT5G16700	2	-1000 bp to TSS	191	198	ATGAATCT
SLIM1 enriched binding motif (EBM)	M0680_1.02	[A/C/G/T]AATG[T/A]A[C/T]CT[A/C/G/T]	AT5G16700	2	-1000 bp to TSS	299	306	ATGAATCT
SLIM1 enriched binding motif (EBM)	M0680_1.02	[A/C/G/T]AATG[T/A]A[C/T]CT[A/C/G/T]	AT5G17000	2	-1000 bp to TSS	506	513	ATGAATCT
SLIM1 enriched binding motif (EBM)	M0680_1.02	[A/C/G/T]AATG[T/A]A[C/T]CT[A/C/G/T]	AT5G17000	2	-1000 bp to TSS	531	538	ATGAATCT
SLIM1 enriched binding motif (EBM)	M0680_1.02	[A/C/G/T]AATG[T/A]A[C/T]CT[A/C/G/T]	AT5G17260	2	-1000 bp to TSS	153	160	ATGAATCT
SLIM1 enriched binding motif (EBM)	M0680_1.02	[A/C/G/T]AATG[T/A]A[C/T]CT[A/C/G/T]	AT5G17260	2	-1000 bp to TSS	810	817	ATGAATCT
SLIM1 enriched binding motif (EBM)	M0680_1.02	[A/C/G/T]AATG[T/A]A[C/T]CT[A/C/G/T]	AT5G19210	2	-1000 bp to TSS	64	57	AGATTCAT
SLIM1 enriched binding motif (EBM)	M0680_1.02	[A/C/G/T]AATG[T/A]A[C/T]CT[A/C/G/T]	AT5G19210	2	-1000 bp to TSS	510	503	AGATTCAT
SLIM1 enriched binding motif (EBM)	M0680_1.02	[A/C/G/T]AATG[T/A]A[C/T]CT[A/C/G/T]	AT5G19470	2	-1000 bp to TSS	892	899	ATGAATCT
SLIM1 enriched binding motif (EBM)	M0680_1.02	[A/C/G/T]AATG[T/A]A[C/T]CT[A/C/G/T]	AT5G19470	2	-1000 bp to TSS	900	907	ATGAATCT
SLIM1 enriched binding motif (EBM)	M0680_1.02	[A/C/G/T]AATG[T/A]A[C/T]CT[A/C/G/T]	AT5G19800	2	-1000 bp to TSS	60	67	ATGAATCT
SLIM1 enriched binding motif (EBM)	M0680_1.02	[A/C/G/T]AATG[T/A]A[C/T]CT[A/C/G/T]	AT5G19800	2	-1000 bp to TSS	525	532	ATGAATCT
SLIM1 enriched binding motif (EBM)	M0680_1.02	[A/C/G/T]AATG[T/A]A[C/T]CT[A/C/G/T]	AT5G20060	2	-1000 bp to TSS	840	847	ATGAATCT
SLIM1 enriched binding motif (EBM)	M0680_1.02	[A/C/G/T]AATG[T/A]A[C/T]CT[A/C/G/T]	AT5G20060	2	-1000 bp to TSS	908	915	ATGAATCT
SLIM1 enriched binding motif (EBM)	M0680_1.02	[A/C/G/T]AATG[T/A]A[C/T]CT[A/C/G/T]	AT5G22370	2	-1000 bp to TSS	253	260	ATGAATCT
SLIM1 enriched binding motif (EBM)	M0680_1.02	[A/C/G/T]AATG[T/A]A[C/T]CT[A/C/G/T]	AT5G22370	2	-1000 bp to TSS	264	271	ATGAATCT
SLIM1 enriched binding motif (EBM)	M0680_1.02	[A/C/G/T]AATG[T/A]A[C/T]CT[A/C/G/T]	AT5G22460	2	-1000 bp to TSS	791	784	AGATTCAT
SLIM1 enriched binding motif (EBM)	M0680_1.02	[A/C/G/T]AATG[T/A]A[C/T]CT[A/C/G/T]	AT5G22460	2	-1000 bp to TSS	852	859	ATGAATCT
SLIM1 enriched binding motif (EBM)	M0680_1.02	[A/C/G/T]AATG[T/A]A[C/T]CT[A/C/G/T]	AT5G23230	2	-1000 bp to TSS	762	755	AGATTCAT
SLIM1 enriched binding motif (EBM)	M0680_1.02	[A/C/G/T]AATG[T/A]A[C/T]CT[A/C/G/T]	AT5G23230	2	-1000 bp to TSS	996	989	AGATTCAT
SLIM1 enriched binding motif (EBM)	M0680_1.02	[A/C/G/T]AATG[T/A]A[C/T]CT[A/C/G/T]	AT5G24655	2	-1000 bp to TSS	658	651	AGATTCAT
SLIM1 enriched binding motif (EBM)	M0680_1.02	[A/C/G/T]AATG[T/A]A[C/T]CT[A/C/G/T]	AT5G24655	2	-1000 bp to TSS	864	857	AGATTCAT
SLIM1 enriched binding motif (EBM)	M0680_1.02	[A/C/G/T]AATG[T/A]A[C/T]CT[A/C/G/T]	AT5G27940	2	-1000 bp to TSS	132	125	AGATTCAT
SLIM1 enriched binding motif (EBM)	M0680_1.02	[A/C/G/T]AATG[T/A]A[C/T]CT[A/C/G/T]	AT5G27940	2	-1000 bp to TSS	823	830	ATGAATCT
SLIM1 enriched binding motif (EBM)	M0680_1.02	[A/C/G/T]AATG[T/A]A[C/T]CT[A/C/G/T]	AT5G28640	2	-1000 bp to TSS	575	582	ATGAATCT
SLIM1 enriched binding motif (EBM)	M0680_1.02	[A/C/G/T]AATG[T/A]A[C/T]CT[A/C/G/T]	AT5G28640	2	-1000 bp to TSS	764	771	ATGAATCT
SLIM1 enriched binding motif (EBM)	M0680_1.02	[A/C/G/T]AATG[T/A]A[C/T]CT[A/C/G/T]	AT5G32460	2	-1000 bp to TSS	369	362	AGATTCAT
SLIM1 enriched binding motif (EBM)	M0680_1.02	[A/C/G/T]AATG[T/A]A[C/T]CT[A/C/G/T]	AT5G32460	2	-1000 bp to TSS	395	388	AGATTCAT
SLIM1 enriched binding motif (EBM)	M0680_1.02	[A/C/G/T]AATG[T/A]A[C/T]CT[A/C/G/T]	AT5G37072	2	-1000 bp to TSS	640	647	ATGAATCT
SLIM1 enriched binding motif (EBM)	M0680_1.02	[A/C/G/T]AATG[T/A]A[C/T]CT[A/C/G/T]	AT5G37072	2	-1000 bp to TSS	780	787	ATGAATCT
SLIM1 enriched binding motif (EBM)	M0680_1.02	[A/C/G/T]AATG[T/A]A[C/T]CT[A/C/G/T]	AT5G38710	2	-1000 bp to TSS	544	551	ATGAATCT
SLIM1 enriched binding motif (EBM)	M0680_1.02	[A/C/G/T]AATG[T/A]A[C/T]CT[A/C/G/T]	AT5G38710	2	-1000 bp to TSS	587	580	AGATTCAT
SLIM1 enriched binding motif (EBM)	M0680_1.02	[A/C/G/T]AATG[T/A]A[C/T]CT[A/C/G/T]	AT5G40700	2	-1000 bp to TSS	588	581	AGATTCAT
SLIM1 enriched binding motif (EBM)	M0680_1.02	[A/C/G/T]AATG[T/A]A[C/T]CT[A/C/G/T]	AT5G40700	2	-1000 bp to TSS	665	658	AGATTCAT
SLIM1 enriched binding motif (EBM)	M0680_1.02	[A/C/G/T]AATG[T/A]A[C/T]CT[A/C/G/T]	AT5G40710	2	-1000 bp to TSS	19	26	ATGAATCT
SLIM1 enriched binding motif (EBM)	M0680_1.02	[A/C/G/T]AATG[T/A]A[C/T]CT[A/C/G/T]	AT5G40710	2	-1000 bp to TSS	96	103	ATGAATCT
SLIM1 enriched binding motif (EBM)	M0680_1.02	[A/C/G/T]AATG[T/A]A[C/T]CT[A/C/G/T]	AT5G42400	2	-1000 bp to TSS	559	566	ATGAATCT
SLIM1 enriched binding motif (EBM)	M0680_1.02	[A/C/G/T]AATG[T/A]A[C/T]CT[A/C/G/T]	AT5G42400	2	-1000 bp to TSS	655	662	ATGAATCT
SLIM1 enriched binding motif (EBM)	M0680_1.02	[A/C/G/T]AATG[T/A]A[C/T]CT[A/C/G/T]	AT5G44480	2	-1000 bp to TSS	275	268	AGATTCAT
SLIM1 enriched binding motif (EBM)	M0680_1.02	[A/C/G/T]AATG[T/A]A[C/T]CT[A/C/G/T]	AT5G44480	2	-1000 bp to TSS	817	810	AGATTCAT
SLIM1 enriched binding motif (EBM)	M0680_1.02	[A/C/G/T]AATG[T/A]A[C/T]CT[A/C/G/T]	AT5G44820	2	-1000 bp to TSS	570	577	ATGAATCT
SLIM1 enriched binding motif (EBM)	M0680_1.02	[A/C/G/T]AATG[T/A]A[C/T]CT[A/C/G/T]	AT5G44820	2	-1000 bp to TSS	813	806	AGATTCAT
SLIM1 enriched binding motif (EBM)	M0680_1.02	[A/C/G/T]AATG[T/A]A[C/T]CT[A/C/G/T]	AT5G45905	2	-1000 bp to TSS	32	39	ATGAATCT
SLIM1 enriched binding motif (EBM)	M0680_1.02	[A/C/G/T]AATG[T/A]A[C/T]CT[A/C/G/T]	AT5G45905	2	-1000 bp to TSS	548	555	ATGAATCT
SLIM1 enriched binding motif (EBM)	M0680_1.02	[A/C/G/T]AATG[T/A]A[C/T]CT[A/C/G/T]	AT5G52815	2	-1000 bp to TSS	368	375	ATGAATCT
SLIM1 enriched binding motif (EBM)	M0680_1.02	[A/C/G/T]AATG[T/A]A[C/T]CT[A/C/G/T]	AT5G52815	2	-1000 bp to TSS	778	785	ATGAATCT
SLIM1 enriched binding motif (EBM)	M0680_1.02	[A/C/G/T]AATG[T/A]A[C/T]CT[A/C/G/T]	AT5G52820	2	-1000 bp to TSS	200	207	ATGAATCT
SLIM1 enriched binding motif (EBM)	M0680_1.02	[A/C/G/T]AATG[T/A]A[C/T]CT[A/C/G/T]	AT5G52820	2	-1000 bp to TSS	610	617	ATGAATCT
SLIM1 enriched binding motif (EBM)	M0680_1.02	[A/C/G/T]AATG[T/A]A[C/T]CT[A/C/G/T]	AT5G53650	2	-1000 bp to TSS	126	133	ATGAATCT
SLIM1 enriched binding motif (EBM)	M0680_1.02	[A/C/G/T]AATG[T/A]A[C/T]CT[A/C/G/T]	AT5G53650	2	-1000 bp to TSS	454	447	AGATTCAT
SLIM1 enriched binding motif (EBM)	M0680_1.02	[A/C/G/T]AATG[T/A]A[C/T]CT[A/C/G/T]	AT5G58150	2	-1000 bp to TSS	219	226	ATGAATCT
SLIM1 enriched binding motif (EBM)	M0680_1.02	[A/C/G/T]AATG[T/A]A[C/T]CT[A/C/G/T]	AT5G58150	2	-1000 bp to TSS	580	587	ATGAATCT
SLIM1 enriched binding motif (EBM)	M0680_1.02	[A/C/G/T]AATG[T/A]A[C/T]CT[A/C/G/T]	AT5G58600	2	-1000 bp to TSS	318	325	ATGAATCT
SLIM1 enriched binding motif (EBM)	M0680_1.02	[A/C/G/T]AATG[T/A]A[C/T]CT[A/C/G/T]	AT5G58600	2	-1000 bp to TSS	801	794	AGATTCAT
SLIM1 enriched binding motif (EBM)	M0680_1.02	[A/C/G/T]AATG[T/A]A[C/T]CT[A/C/G/T]	AT5G64290	2	-1000 bp to TSS	695	688	AGATTCAT
SLIM1 enriched binding motif (EBM)	M0680_1.02	[A/C/G/T]AATG[T/A]A[C/T]CT[A/C/G/T]	AT5G64290	2	-1000 bp to TSS	795	802	ATGAATCT
SLIM1 enriched binding motif (EBM)	M0680_1.02	[A/C/G/T]AATG[T/A]A[C/T]CT[A/C/G/T]	AT5G64300	2	-1000 bp to TSS	100	93	AGATTCAT
SLIM1 enriched binding motif (EBM)	M0680_1.02	[A/C/G/T]AATG[T/A]A[C/T]CT[A/C/G/T]	AT5G64300	2	-1000 bp to TSS	200	207	ATGAATCT
SLIM1 enriched binding motif (EBM)	M0680_1.02	[A/C/G/T]AATG[T/A]A[C/T]CT[A/C/G/T]	AT5G65750	2	-1000 bp to TSS	837	844	ATGAATCT
SLIM1 enriched binding motif (EBM)	M0680_1.02	[A/C/G/T]AATG[T/A]A[C/T]CT[A/C/G/T]	AT5G65750	2	-1000 bp to TSS	928	935	ATGAATCT
SLIM1 enriched binding motif (EBM)	M0680_1.02	[A/C/G/T]AATG[T/A]A[C/T]CT[A/C/G/T]	ATCG00170	2	-1000 bp to TSS	324	331	ATGAATCT
SLIM1 enriched binding motif (EBM)	M0680_1.02	[A/C/G/T]AATG[T/A]A[C/T]CT[A/C/G/T]	ATCG00170	2	-1000 bp to TSS	646	653	ATGAATCT
SLIM1 enriched binding motif (EBM)	M0680_1.02	[A/C/G/T]AATG[T/A]A[C/T]CT[A/C/G/T]	AT1G01340	1	-1000 bp to TSS	839	846	ATGAATCT
SLIM1 enriched binding motif (EBM)	M0680_1.02	[A/C/G/T]AATG[T/A]A[C/T]CT[A/C/G/T]	AT1G01350	1	-1000 bp to TSS	997	990	AGATTCAT
SLIM1 enriched binding motif (EBM)	M0680_1.02	[A/C/G/T]AATG[T/A]A[C/T]CT[A/C/G/T]	AT1G01380	1	-1000 bp to TSS	213	206	AGATTCAT
SLIM1 enriched binding motif (EBM)	M0680_1.02	[A/C/G/T]AATG[T/A]A[C/T]CT[A/C/G/T]	AT1G01810	1	-1000 bp to TSS	284	291	ATGAATCT
SLIM1 enriched binding motif (EBM)	M0680_1.02	[A/C/G/T]AATG[T/A]A[C/T]CT[A/C/G/T]	AT1G02290	1	-1000 bp to TSS	458	465	ATGAATCT
SLIM1 enriched binding motif (EBM)	M0680_1.02	[A/C/G/T]AATG[T/A]A[C/T]CT[A/C/G/T]	AT1G02480	1	-1000 bp to TSS	651	658	ATGAATCT
SLIM1 enriched binding motif (EBM)	M0680_1.02	[A/C/G/T]AATG[T/A]A[C/T]CT[A/C/G/T]	AT1G02680	1	-1000 bp to TSS	440	433	AGATTCAT
SLIM1 enriched binding motif (EBM)	M0680_1.02	[A/C/G/T]AATG[T/A]A[C/T]CT[A/C/G/T]	AT1G02690	1	-1000 bp to TSS	853	846	AGATTCAT
SLIM1 enriched binding motif (EBM)	M0680_1.02	[A/C/G/T]AATG[T/A]A[C/T]CT[A/C/G/T]	AT1G02780	1	-1000 bp to TSS	362	369	ATGAATCT
SLIM1 enriched binding motif (EBM)	M0680_1.02	[A/C/G/T]AATG[T/A]A[C/T]CT[A/C/G/T]	AT1G02870	1	-1000 bp to TSS	823	830	ATGAATCT
SLIM1 enriched binding motif (EBM)	M0680_1.02	[A/C/G/T]AATG[T/A]A[C/T]CT[A/C/G/T]	AT1G02950	1	-1000 bp to TSS	13	6	AGATTCAT
SLIM1 enriched binding motif (EBM)	M0680_1.02	[A/C/G/T]AATG[T/A]A[C/T]CT[A/C/G/T]	AT1G03080	1	-1000 bp to TSS	310	317	ATGAATCT
SLIM1 enriched binding motif (EBM)	M0680_1.02	[A/C/G/T]AATG[T/A]A[C/T]CT[A/C/G/T]	AT1G03090	1	-1000 bp to TSS	454	447	AGATTCAT
SLIM1 enriched binding motif (EBM)	M0680_1.02	[A/C/G/T]AATG[T/A]A[C/T]CT[A/C/G/T]	AT1G03106	1	-1000 bp to TSS	224	217	AGATTCAT
SLIM1 enriched binding motif (EBM)	M0680_1.02	[A/C/G/T]AATG[T/A]A[C/T]CT[A/C/G/T]	AT1G03110	1	-1000 bp to TSS	180	173	AGATTCAT
SLIM1 enriched binding motif (EBM)	M0680_1.02	[A/C/G/T]AATG[T/A]A[C/T]CT[A/C/G/T]	AT1G03325	1	-1000 bp to TSS	118	125	ATGAATCT
SLIM1 enriched binding motif (EBM)	M0680_1.02	[A/C/G/T]AATG[T/A]A[C/T]CT[A/C/G/T]	AT1G03360	1	-1000 bp to TSS	357	350	AGATTCAT
SLIM1 enriched binding motif (EBM)	M0680_1.02	[A/C/G/T]AATG[T/A]A[C/T]CT[A/C/G/T]	AT1G03410	1	-1000 bp to TSS	776	783	ATGAATCT
SLIM1 enriched binding motif (EBM)	M0680_1.02	[A/C/G/T]AATG[T/A]A[C/T]CT[A/C/G/T]	AT1G03530	1	-1000 bp to TSS	818	811	AGATTCAT
SLIM1 enriched binding motif (EBM)	M0680_1.02	[A/C/G/T]AATG[T/A]A[C/T]CT[A/C/G/T]	AT1G03610	1	-1000 bp to TSS	614	621	ATGAATCT
SLIM1 enriched binding motif (EBM)	M0680_1.02	[A/C/G/T]AATG[T/A]A[C/T]CT[A/C/G/T]	AT1G03630	1	-1000 bp to TSS	930	923	AGATTCAT
SLIM1 enriched binding motif (EBM)	M0680_1.02	[A/C/G/T]AATG[T/A]A[C/T]CT[A/C/G/T]	AT1G03650	1	-1000 bp to TSS	669	676	ATGAATCT
SLIM1 enriched binding motif (EBM)	M0680_1.02	[A/C/G/T]AATG[T/A]A[C/T]CT[A/C/G/T]	AT1G03680	1	-1000 bp to TSS	366	359	AGATTCAT
SLIM1 enriched binding motif (EBM)	M0680_1.02	[A/C/G/T]AATG[T/A]A[C/T]CT[A/C/G/T]	AT1G03810	1	-1000 bp to TSS	572	579	ATGAATCT
SLIM1 enriched binding motif (EBM)	M0680_1.02	[A/C/G/T]AATG[T/A]A[C/T]CT[A/C/G/T]	AT1G03830	1	-1000 bp to TSS	582	575	AGATTCAT
SLIM1 enriched binding motif (EBM)	M0680_1.02	[A/C/G/T]AATG[T/A]A[C/T]CT[A/C/G/T]	AT1G03900	1	-1000 bp to TSS	222	215	AGATTCAT
SLIM1 enriched binding motif (EBM)	M0680_1.02	[A/C/G/T]AATG[T/A]A[C/T]CT[A/C/G/T]	AT1G04000	1	-1000 bp to TSS	636	629	AGATTCAT
SLIM1 enriched binding motif (EBM)	M0680_1.02	[A/C/G/T]AATG[T/A]A[C/T]CT[A/C/G/T]	AT1G04037	1	-1000 bp to TSS	265	258	AGATTCAT
SLIM1 enriched binding motif (EBM)	M0680_1.02	[A/C/G/T]AATG[T/A]A[C/T]CT[A/C/G/T]	AT1G04107	1	-1000 bp to TSS	674	681	ATGAATCT
SLIM1 enriched binding motif (EBM)	M0680_1.02	[A/C/G/T]AATG[T/A]A[C/T]CT[A/C/G/T]	AT1G04143	1	-1000 bp to TSS	875	882	ATGAATCT
SLIM1 enriched binding motif (EBM)	M0680_1.02	[A/C/G/T]AATG[T/A]A[C/T]CT[A/C/G/T]	AT1G04247	1	-1000 bp to TSS	689	696	ATGAATCT
SLIM1 enriched binding motif (EBM)	M0680_1.02	[A/C/G/T]AATG[T/A]A[C/T]CT[A/C/G/T]	AT1G04293	1	-1000 bp to TSS	855	848	AGATTCAT
SLIM1 enriched binding motif (EBM)	M0680_1.02	[A/C/G/T]AATG[T/A]A[C/T]CT[A/C/G/T]	AT1G04323	1	-1000 bp to TSS	868	875	ATGAATCT
SLIM1 enriched binding motif (EBM)	M0680_1.02	[A/C/G/T]AATG[T/A]A[C/T]CT[A/C/G/T]	AT1G04340	1	-1000 bp to TSS	598	591	AGATTCAT
SLIM1 enriched binding motif (EBM)	M0680_1.02	[A/C/G/T]AATG[T/A]A[C/T]CT[A/C/G/T]	AT1G04343	1	-1000 bp to TSS	91	98	ATGAATCT
SLIM1 enriched binding motif (EBM)	M0680_1.02	[A/C/G/T]AATG[T/A]A[C/T]CT[A/C/G/T]	AT1G04373	1	-1000 bp to TSS	209	216	ATGAATCT
SLIM1 enriched binding motif (EBM)	M0680_1.02	[A/C/G/T]AATG[T/A]A[C/T]CT[A/C/G/T]	AT1G04400	1	-1000 bp to TSS	655	648	AGATTCAT
SLIM1 enriched binding motif (EBM)	M0680_1.02	[A/C/G/T]AATG[T/A]A[C/T]CT[A/C/G/T]	AT1G04455	1	-1000 bp to TSS	346	339	AGATTCAT
SLIM1 enriched binding motif (EBM)	M0680_1.02	[A/C/G/T]AATG[T/A]A[C/T]CT[A/C/G/T]	AT1G04493	1	-1000 bp to TSS	59	66	ATGAATCT
SLIM1 enriched binding motif (EBM)	M0680_1.02	[A/C/G/T]AATG[T/A]A[C/T]CT[A/C/G/T]	AT1G04507	1	-1000 bp to TSS	417	424	ATGAATCT
SLIM1 enriched binding motif (EBM)	M0680_1.02	[A/C/G/T]AATG[T/A]A[C/T]CT[A/C/G/T]	AT1G04527	1	-1000 bp to TSS	783	790	ATGAATCT
SLIM1 enriched binding motif (EBM)	M0680_1.02	[A/C/G/T]AATG[T/A]A[C/T]CT[A/C/G/T]	AT1G04890	1	-1000 bp to TSS	395	388	AGATTCAT
SLIM1 enriched binding motif (EBM)	M0680_1.02	[A/C/G/T]AATG[T/A]A[C/T]CT[A/C/G/T]	AT1G04893	1	-1000 bp to TSS	293	286	AGATTCAT
SLIM1 enriched binding motif (EBM)	M0680_1.02	[A/C/G/T]AATG[T/A]A[C/T]CT[A/C/G/T]	AT1G04900	1	-1000 bp to TSS	365	372	ATGAATCT
SLIM1 enriched binding motif (EBM)	M0680_1.02	[A/C/G/T]AATG[T/A]A[C/T]CT[A/C/G/T]	AT1G04920	1	-1000 bp to TSS	246	239	AGATTCAT
SLIM1 enriched binding motif (EBM)	M0680_1.02	[A/C/G/T]AATG[T/A]A[C/T]CT[A/C/G/T]	AT1G04943	1	-1000 bp to TSS	162	155	AGATTCAT
SLIM1 enriched binding motif (EBM)	M0680_1.02	[A/C/G/T]AATG[T/A]A[C/T]CT[A/C/G/T]	AT1G04947	1	-1000 bp to TSS	312	319	ATGAATCT
SLIM1 enriched binding motif (EBM)	M0680_1.02	[A/C/G/T]AATG[T/A]A[C/T]CT[A/C/G/T]	AT1G05035	1	-1000 bp to TSS	783	790	ATGAATCT
SLIM1 enriched binding motif (EBM)	M0680_1.02	[A/C/G/T]AATG[T/A]A[C/T]CT[A/C/G/T]	AT1G05053	1	-1000 bp to TSS	906	899	AGATTCAT
SLIM1 enriched binding motif (EBM)	M0680_1.02	[A/C/G/T]AATG[T/A]A[C/T]CT[A/C/G/T]	AT1G05057	1	-1000 bp to TSS	166	159	AGATTCAT
SLIM1 enriched binding motif (EBM)	M0680_1.02	[A/C/G/T]AATG[T/A]A[C/T]CT[A/C/G/T]	AT1G05063	1	-1000 bp to TSS	165	158	AGATTCAT
SLIM1 enriched binding motif (EBM)	M0680_1.02	[A/C/G/T]AATG[T/A]A[C/T]CT[A/C/G/T]	AT1G05093	1	-1000 bp to TSS	172	165	AGATTCAT
SLIM1 enriched binding motif (EBM)	M0680_1.02	[A/C/G/T]AATG[T/A]A[C/T]CT[A/C/G/T]	AT1G05107	1	-1000 bp to TSS	269	262	AGATTCAT
SLIM1 enriched binding motif (EBM)	M0680_1.02	[A/C/G/T]AATG[T/A]A[C/T]CT[A/C/G/T]	AT1G05135	1	-1000 bp to TSS	444	437	AGATTCAT
SLIM1 enriched binding motif (EBM)	M0680_1.02	[A/C/G/T]AATG[T/A]A[C/T]CT[A/C/G/T]	AT1G05140	1	-1000 bp to TSS	734	741	ATGAATCT
SLIM1 enriched binding motif (EBM)	M0680_1.02	[A/C/G/T]AATG[T/A]A[C/T]CT[A/C/G/T]	AT1G05150	1	-1000 bp to TSS	289	282	AGATTCAT
SLIM1 enriched binding motif (EBM)	M0680_1.02	[A/C/G/T]AATG[T/A]A[C/T]CT[A/C/G/T]	AT1G05177	1	-1000 bp to TSS	85	92	ATGAATCT
SLIM1 enriched binding motif (EBM)	M0680_1.02	[A/C/G/T]AATG[T/A]A[C/T]CT[A/C/G/T]	AT1G05210	1	-1000 bp to TSS	522	515	AGATTCAT
SLIM1 enriched binding motif (EBM)	M0680_1.02	[A/C/G/T]AATG[T/A]A[C/T]CT[A/C/G/T]	AT1G05213	1	-1000 bp to TSS	701	694	AGATTCAT
SLIM1 enriched binding motif (EBM)	M0680_1.02	[A/C/G/T]AATG[T/A]A[C/T]CT[A/C/G/T]	AT1G05227	1	-1000 bp to TSS	211	204	AGATTCAT
SLIM1 enriched binding motif (EBM)	M0680_1.02	[A/C/G/T]AATG[T/A]A[C/T]CT[A/C/G/T]	AT1G05313	1	-1000 bp to TSS	36	29	AGATTCAT
SLIM1 enriched binding motif (EBM)	M0680_1.02	[A/C/G/T]AATG[T/A]A[C/T]CT[A/C/G/T]	AT1G05317	1	-1000 bp to TSS	152	159	ATGAATCT
SLIM1 enriched binding motif (EBM)	M0680_1.02	[A/C/G/T]AATG[T/A]A[C/T]CT[A/C/G/T]	AT1G05400	1	-1000 bp to TSS	575	582	ATGAATCT
SLIM1 enriched binding motif (EBM)	M0680_1.02	[A/C/G/T]AATG[T/A]A[C/T]CT[A/C/G/T]	AT1G05447	1	-1000 bp to TSS	816	809	AGATTCAT
SLIM1 enriched binding motif (EBM)	M0680_1.02	[A/C/G/T]AATG[T/A]A[C/T]CT[A/C/G/T]	AT1G05487	1	-1000 bp to TSS	217	210	AGATTCAT
SLIM1 enriched binding motif (EBM)	M0680_1.02	[A/C/G/T]AATG[T/A]A[C/T]CT[A/C/G/T]	AT1G05520	1	-1000 bp to TSS	655	648	AGATTCAT
SLIM1 enriched binding motif (EBM)	M0680_1.02	[A/C/G/T]AATG[T/A]A[C/T]CT[A/C/G/T]	AT1G05593	1	-1000 bp to TSS	492	485	AGATTCAT
SLIM1 enriched binding motif (EBM)	M0680_1.02	[A/C/G/T]AATG[T/A]A[C/T]CT[A/C/G/T]	AT1G05603	1	-1000 bp to TSS	748	755	ATGAATCT
SLIM1 enriched binding motif (EBM)	M0680_1.02	[A/C/G/T]AATG[T/A]A[C/T]CT[A/C/G/T]	AT1G05717	1	-1000 bp to TSS	477	484	ATGAATCT
SLIM1 enriched binding motif (EBM)	M0680_1.02	[A/C/G/T]AATG[T/A]A[C/T]CT[A/C/G/T]	AT1G05773	1	-1000 bp to TSS	234	241	ATGAATCT
SLIM1 enriched binding motif (EBM)	M0680_1.02	[A/C/G/T]AATG[T/A]A[C/T]CT[A/C/G/T]	AT1G05783	1	-1000 bp to TSS	831	838	ATGAATCT
SLIM1 enriched binding motif (EBM)	M0680_1.02	[A/C/G/T]AATG[T/A]A[C/T]CT[A/C/G/T]	AT1G05785	1	-1000 bp to TSS	718	711	AGATTCAT
SLIM1 enriched binding motif (EBM)	M0680_1.02	[A/C/G/T]AATG[T/A]A[C/T]CT[A/C/G/T]	AT1G05817	1	-1000 bp to TSS	662	655	AGATTCAT
SLIM1 enriched binding motif (EBM)	M0680_1.02	[A/C/G/T]AATG[T/A]A[C/T]CT[A/C/G/T]	AT1G05837	1	-1000 bp to TSS	596	589	AGATTCAT
SLIM1 enriched binding motif (EBM)	M0680_1.02	[A/C/G/T]AATG[T/A]A[C/T]CT[A/C/G/T]	AT1G05897	1	-1000 bp to TSS	270	277	ATGAATCT
SLIM1 enriched binding motif (EBM)	M0680_1.02	[A/C/G/T]AATG[T/A]A[C/T]CT[A/C/G/T]	AT1G05977	1	-1000 bp to TSS	440	447	ATGAATCT
SLIM1 enriched binding motif (EBM)	M0680_1.02	[A/C/G/T]AATG[T/A]A[C/T]CT[A/C/G/T]	AT1G06030	1	-1000 bp to TSS	56	63	ATGAATCT
SLIM1 enriched binding motif (EBM)	M0680_1.02	[A/C/G/T]AATG[T/A]A[C/T]CT[A/C/G/T]	AT1G06053	1	-1000 bp to TSS	770	763	AGATTCAT
SLIM1 enriched binding motif (EBM)	M0680_1.02	[A/C/G/T]AATG[T/A]A[C/T]CT[A/C/G/T]	AT1G06117	1	-1000 bp to TSS	364	357	AGATTCAT
SLIM1 enriched binding motif (EBM)	M0680_1.02	[A/C/G/T]AATG[T/A]A[C/T]CT[A/C/G/T]	AT1G06153	1	-1000 bp to TSS	296	303	ATGAATCT
SLIM1 enriched binding motif (EBM)	M0680_1.02	[A/C/G/T]AATG[T/A]A[C/T]CT[A/C/G/T]	AT1G06160	1	-1000 bp to TSS	64	57	AGATTCAT
SLIM1 enriched binding motif (EBM)	M0680_1.02	[A/C/G/T]AATG[T/A]A[C/T]CT[A/C/G/T]	AT1G06197	1	-1000 bp to TSS	823	830	ATGAATCT
SLIM1 enriched binding motif (EBM)	M0680_1.02	[A/C/G/T]AATG[T/A]A[C/T]CT[A/C/G/T]	AT1G06320	1	-1000 bp to TSS	794	801	ATGAATCT
SLIM1 enriched binding motif (EBM)	M0680_1.02	[A/C/G/T]AATG[T/A]A[C/T]CT[A/C/G/T]	AT1G06353	1	-1000 bp to TSS	535	528	AGATTCAT
SLIM1 enriched binding motif (EBM)	M0680_1.02	[A/C/G/T]AATG[T/A]A[C/T]CT[A/C/G/T]	AT1G06360	1	-1000 bp to TSS	679	672	AGATTCAT
SLIM1 enriched binding motif (EBM)	M0680_1.02	[A/C/G/T]AATG[T/A]A[C/T]CT[A/C/G/T]	AT1G06393	1	-1000 bp to TSS	265	258	AGATTCAT
SLIM1 enriched binding motif (EBM)	M0680_1.02	[A/C/G/T]AATG[T/A]A[C/T]CT[A/C/G/T]	AT1G06440	1	-1000 bp to TSS	272	279	ATGAATCT
SLIM1 enriched binding motif (EBM)	M0680_1.02	[A/C/G/T]AATG[T/A]A[C/T]CT[A/C/G/T]	AT1G06460	1	-1000 bp to TSS	549	556	ATGAATCT
SLIM1 enriched binding motif (EBM)	M0680_1.02	[A/C/G/T]AATG[T/A]A[C/T]CT[A/C/G/T]	AT1G06470	1	-1000 bp to TSS	750	743	AGATTCAT
SLIM1 enriched binding motif (EBM)	M0680_1.02	[A/C/G/T]AATG[T/A]A[C/T]CT[A/C/G/T]	AT1G06493	1	-1000 bp to TSS	301	308	ATGAATCT
SLIM1 enriched binding motif (EBM)	M0680_1.02	[A/C/G/T]AATG[T/A]A[C/T]CT[A/C/G/T]	AT1G06497	1	-1000 bp to TSS	406	399	AGATTCAT
SLIM1 enriched binding motif (EBM)	M0680_1.02	[A/C/G/T]AATG[T/A]A[C/T]CT[A/C/G/T]	AT1G06670	1	-1000 bp to TSS	678	685	ATGAATCT
SLIM1 enriched binding motif (EBM)	M0680_1.02	[A/C/G/T]AATG[T/A]A[C/T]CT[A/C/G/T]	AT1G06783	1	-1000 bp to TSS	638	645	ATGAATCT
SLIM1 enriched binding motif (EBM)	M0680_1.02	[A/C/G/T]AATG[T/A]A[C/T]CT[A/C/G/T]	AT1G06880	1	-1000 bp to TSS	854	861	ATGAATCT
SLIM1 enriched binding motif (EBM)	M0680_1.02	[A/C/G/T]AATG[T/A]A[C/T]CT[A/C/G/T]	AT1G06920	1	-1000 bp to TSS	37	44	ATGAATCT
SLIM1 enriched binding motif (EBM)	M0680_1.02	[A/C/G/T]AATG[T/A]A[C/T]CT[A/C/G/T]	AT1G06953	1	-1000 bp to TSS	499	506	ATGAATCT
SLIM1 enriched binding motif (EBM)	M0680_1.02	[A/C/G/T]AATG[T/A]A[C/T]CT[A/C/G/T]	AT1G06977	1	-1000 bp to TSS	628	635	ATGAATCT
SLIM1 enriched binding motif (EBM)	M0680_1.02	[A/C/G/T]AATG[T/A]A[C/T]CT[A/C/G/T]	AT1G06997	1	-1000 bp to TSS	393	386	AGATTCAT
SLIM1 enriched binding motif (EBM)	M0680_1.02	[A/C/G/T]AATG[T/A]A[C/T]CT[A/C/G/T]	AT1G07051	1	-1000 bp to TSS	199	192	AGATTCAT
SLIM1 enriched binding motif (EBM)	M0680_1.02	[A/C/G/T]AATG[T/A]A[C/T]CT[A/C/G/T]	AT1G07120	1	-1000 bp to TSS	126	133	ATGAATCT
SLIM1 enriched binding motif (EBM)	M0680_1.02	[A/C/G/T]AATG[T/A]A[C/T]CT[A/C/G/T]	AT1G07130	1	-1000 bp to TSS	727	720	AGATTCAT
SLIM1 enriched binding motif (EBM)	M0680_1.02	[A/C/G/T]AATG[T/A]A[C/T]CT[A/C/G/T]	AT1G07147	1	-1000 bp to TSS	299	306	ATGAATCT
SLIM1 enriched binding motif (EBM)	M0680_1.02	[A/C/G/T]AATG[T/A]A[C/T]CT[A/C/G/T]	AT1G07173	1	-1000 bp to TSS	507	500	AGATTCAT
SLIM1 enriched binding motif (EBM)	M0680_1.02	[A/C/G/T]AATG[T/A]A[C/T]CT[A/C/G/T]	AT1G07253	1	-1000 bp to TSS	299	292	AGATTCAT
SLIM1 enriched binding motif (EBM)	M0680_1.02	[A/C/G/T]AATG[T/A]A[C/T]CT[A/C/G/T]	AT1G07257	1	-1000 bp to TSS	897	904	ATGAATCT
SLIM1 enriched binding motif (EBM)	M0680_1.02	[A/C/G/T]AATG[T/A]A[C/T]CT[A/C/G/T]	AT1G07313	1	-1000 bp to TSS	297	304	ATGAATCT
SLIM1 enriched binding motif (EBM)	M0680_1.02	[A/C/G/T]AATG[T/A]A[C/T]CT[A/C/G/T]	AT1G07337	1	-1000 bp to TSS	426	433	ATGAATCT
SLIM1 enriched binding motif (EBM)	M0680_1.02	[A/C/G/T]AATG[T/A]A[C/T]CT[A/C/G/T]	AT1G07360	1	-1000 bp to TSS	513	506	AGATTCAT
SLIM1 enriched binding motif (EBM)	M0680_1.02	[A/C/G/T]AATG[T/A]A[C/T]CT[A/C/G/T]	AT1G07393	1	-1000 bp to TSS	238	245	ATGAATCT
SLIM1 enriched binding motif (EBM)	M0680_1.02	[A/C/G/T]AATG[T/A]A[C/T]CT[A/C/G/T]	AT1G07420	1	-1000 bp to TSS	565	558	AGATTCAT
SLIM1 enriched binding motif (EBM)	M0680_1.02	[A/C/G/T]AATG[T/A]A[C/T]CT[A/C/G/T]	AT1G07453	1	-1000 bp to TSS	100	107	ATGAATCT
SLIM1 enriched binding motif (EBM)	M0680_1.02	[A/C/G/T]AATG[T/A]A[C/T]CT[A/C/G/T]	AT1G07470	1	-1000 bp to TSS	322	329	ATGAATCT
SLIM1 enriched binding motif (EBM)	M0680_1.02	[A/C/G/T]AATG[T/A]A[C/T]CT[A/C/G/T]	AT1G07503	1	-1000 bp to TSS	784	777	AGATTCAT
SLIM1 enriched binding motif (EBM)	M0680_1.02	[A/C/G/T]AATG[T/A]A[C/T]CT[A/C/G/T]	AT1G07533	1	-1000 bp to TSS	718	725	ATGAATCT
SLIM1 enriched binding motif (EBM)	M0680_1.02	[A/C/G/T]AATG[T/A]A[C/T]CT[A/C/G/T]	AT1G07547	1	-1000 bp to TSS	380	373	AGATTCAT
SLIM1 enriched binding motif (EBM)	M0680_1.02	[A/C/G/T]AATG[T/A]A[C/T]CT[A/C/G/T]	AT1G07597	1	-1000 bp to TSS	642	649	ATGAATCT
SLIM1 enriched binding motif (EBM)	M0680_1.02	[A/C/G/T]AATG[T/A]A[C/T]CT[A/C/G/T]	AT1G07615	1	-1000 bp to TSS	667	674	ATGAATCT
SLIM1 enriched binding motif (EBM)	M0680_1.02	[A/C/G/T]AATG[T/A]A[C/T]CT[A/C/G/T]	AT1G07663	1	-1000 bp to TSS	231	224	AGATTCAT
SLIM1 enriched binding motif (EBM)	M0680_1.02	[A/C/G/T]AATG[T/A]A[C/T]CT[A/C/G/T]	AT1G07673	1	-1000 bp to TSS	776	769	AGATTCAT
SLIM1 enriched binding motif (EBM)	M0680_1.02	[A/C/G/T]AATG[T/A]A[C/T]CT[A/C/G/T]	AT1G07683	1	-1000 bp to TSS	536	543	ATGAATCT
SLIM1 enriched binding motif (EBM)	M0680_1.02	[A/C/G/T]AATG[T/A]A[C/T]CT[A/C/G/T]	AT1G07700	1	-1000 bp to TSS	868	861	AGATTCAT
SLIM1 enriched binding motif (EBM)	M0680_1.02	[A/C/G/T]AATG[T/A]A[C/T]CT[A/C/G/T]	AT1G07720	1	-1000 bp to TSS	720	727	ATGAATCT
SLIM1 enriched binding motif (EBM)	M0680_1.02	[A/C/G/T]AATG[T/A]A[C/T]CT[A/C/G/T]	AT1G07783	1	-1000 bp to TSS	324	331	ATGAATCT
SLIM1 enriched binding motif (EBM)	M0680_1.02	[A/C/G/T]AATG[T/A]A[C/T]CT[A/C/G/T]	AT1G07830	1	-1000 bp to TSS	30	37	ATGAATCT
SLIM1 enriched binding motif (EBM)	M0680_1.02	[A/C/G/T]AATG[T/A]A[C/T]CT[A/C/G/T]	AT1G07853	1	-1000 bp to TSS	118	111	AGATTCAT
SLIM1 enriched binding motif (EBM)	M0680_1.02	[A/C/G/T]AATG[T/A]A[C/T]CT[A/C/G/T]	AT1G07897	1	-1000 bp to TSS	642	649	ATGAATCT
SLIM1 enriched binding motif (EBM)	M0680_1.02	[A/C/G/T]AATG[T/A]A[C/T]CT[A/C/G/T]	AT1G07903	1	-1000 bp to TSS	421	428	ATGAATCT
SLIM1 enriched binding motif (EBM)	M0680_1.02	[A/C/G/T]AATG[T/A]A[C/T]CT[A/C/G/T]	AT1G07950	1	-1000 bp to TSS	894	887	AGATTCAT
SLIM1 enriched binding motif (EBM)	M0680_1.02	[A/C/G/T]AATG[T/A]A[C/T]CT[A/C/G/T]	AT1G08023	1	-1000 bp to TSS	955	948	AGATTCAT
SLIM1 enriched binding motif (EBM)	M0680_1.02	[A/C/G/T]AATG[T/A]A[C/T]CT[A/C/G/T]	AT1G08087	1	-1000 bp to TSS	790	797	ATGAATCT
SLIM1 enriched binding motif (EBM)	M0680_1.02	[A/C/G/T]AATG[T/A]A[C/T]CT[A/C/G/T]	AT1G08127	1	-1000 bp to TSS	709	702	AGATTCAT
SLIM1 enriched binding motif (EBM)	M0680_1.02	[A/C/G/T]AATG[T/A]A[C/T]CT[A/C/G/T]	AT1G08153	1	-1000 bp to TSS	675	682	ATGAATCT
SLIM1 enriched binding motif (EBM)	M0680_1.02	[A/C/G/T]AATG[T/A]A[C/T]CT[A/C/G/T]	AT1G08170	1	-1000 bp to TSS	375	368	AGATTCAT
SLIM1 enriched binding motif (EBM)	M0680_1.02	[A/C/G/T]AATG[T/A]A[C/T]CT[A/C/G/T]	AT1G08180	1	-1000 bp to TSS	933	940	ATGAATCT
SLIM1 enriched binding motif (EBM)	M0680_1.02	[A/C/G/T]AATG[T/A]A[C/T]CT[A/C/G/T]	AT1G08223	1	-1000 bp to TSS	108	115	ATGAATCT
SLIM1 enriched binding motif (EBM)	M0680_1.02	[A/C/G/T]AATG[T/A]A[C/T]CT[A/C/G/T]	AT1G08323	1	-1000 bp to TSS	253	260	ATGAATCT
SLIM1 enriched binding motif (EBM)	M0680_1.02	[A/C/G/T]AATG[T/A]A[C/T]CT[A/C/G/T]	AT1G08377	1	-1000 bp to TSS	487	494	ATGAATCT
SLIM1 enriched binding motif (EBM)	M0680_1.02	[A/C/G/T]AATG[T/A]A[C/T]CT[A/C/G/T]	AT1G08380	1	-1000 bp to TSS	41	48	ATGAATCT
SLIM1 enriched binding motif (EBM)	M0680_1.02	[A/C/G/T]AATG[T/A]A[C/T]CT[A/C/G/T]	AT1G08403	1	-1000 bp to TSS	155	148	AGATTCAT
SLIM1 enriched binding motif (EBM)	M0680_1.02	[A/C/G/T]AATG[T/A]A[C/T]CT[A/C/G/T]	AT1G08463	1	-1000 bp to TSS	856	863	ATGAATCT
SLIM1 enriched binding motif (EBM)	M0680_1.02	[A/C/G/T]AATG[T/A]A[C/T]CT[A/C/G/T]	AT1G08523	1	-1000 bp to TSS	568	561	AGATTCAT
SLIM1 enriched binding motif (EBM)	M0680_1.02	[A/C/G/T]AATG[T/A]A[C/T]CT[A/C/G/T]	AT1G08643	1	-1000 bp to TSS	402	395	AGATTCAT
SLIM1 enriched binding motif (EBM)	M0680_1.02	[A/C/G/T]AATG[T/A]A[C/T]CT[A/C/G/T]	AT1G08645	1	-1000 bp to TSS	368	375	ATGAATCT
SLIM1 enriched binding motif (EBM)	M0680_1.02	[A/C/G/T]AATG[T/A]A[C/T]CT[A/C/G/T]	AT1G08673	1	-1000 bp to TSS	791	784	AGATTCAT
SLIM1 enriched binding motif (EBM)	M0680_1.02	[A/C/G/T]AATG[T/A]A[C/T]CT[A/C/G/T]	AT1G08683	1	-1000 bp to TSS	127	134	ATGAATCT
SLIM1 enriched binding motif (EBM)	M0680_1.02	[A/C/G/T]AATG[T/A]A[C/T]CT[A/C/G/T]	AT1G08787	1	-1000 bp to TSS	437	444	ATGAATCT
SLIM1 enriched binding motif (EBM)	M0680_1.02	[A/C/G/T]AATG[T/A]A[C/T]CT[A/C/G/T]	AT1G08795	1	-1000 bp to TSS	51	58	ATGAATCT
SLIM1 enriched binding motif (EBM)	M0680_1.02	[A/C/G/T]AATG[T/A]A[C/T]CT[A/C/G/T]	AT1G08855	1	-1000 bp to TSS	183	176	AGATTCAT
SLIM1 enriched binding motif (EBM)	M0680_1.02	[A/C/G/T]AATG[T/A]A[C/T]CT[A/C/G/T]	AT1G08867	1	-1000 bp to TSS	598	591	AGATTCAT
SLIM1 enriched binding motif (EBM)	M0680_1.02	[A/C/G/T]AATG[T/A]A[C/T]CT[A/C/G/T]	AT1G08887	1	-1000 bp to TSS	632	625	AGATTCAT
SLIM1 enriched binding motif (EBM)	M0680_1.02	[A/C/G/T]AATG[T/A]A[C/T]CT[A/C/G/T]	AT1G08943	1	-1000 bp to TSS	576	569	AGATTCAT
SLIM1 enriched binding motif (EBM)	M0680_1.02	[A/C/G/T]AATG[T/A]A[C/T]CT[A/C/G/T]	AT1G09017	1	-1000 bp to TSS	83	90	ATGAATCT
SLIM1 enriched binding motif (EBM)	M0680_1.02	[A/C/G/T]AATG[T/A]A[C/T]CT[A/C/G/T]	AT1G09023	1	-1000 bp to TSS	261	268	ATGAATCT
SLIM1 enriched binding motif (EBM)	M0680_1.02	[A/C/G/T]AATG[T/A]A[C/T]CT[A/C/G/T]	AT1G09033	1	-1000 bp to TSS	523	516	AGATTCAT
SLIM1 enriched binding motif (EBM)	M0680_1.02	[A/C/G/T]AATG[T/A]A[C/T]CT[A/C/G/T]	AT1G09067	1	-1000 bp to TSS	232	225	AGATTCAT
SLIM1 enriched binding motif (EBM)	M0680_1.02	[A/C/G/T]AATG[T/A]A[C/T]CT[A/C/G/T]	AT1G09087	1	-1000 bp to TSS	575	568	AGATTCAT
SLIM1 enriched binding motif (EBM)	M0680_1.02	[A/C/G/T]AATG[T/A]A[C/T]CT[A/C/G/T]	AT1G09095	1	-1000 bp to TSS	74	67	AGATTCAT
SLIM1 enriched binding motif (EBM)	M0680_1.02	[A/C/G/T]AATG[T/A]A[C/T]CT[A/C/G/T]	AT1G09157	1	-1000 bp to TSS	138	145	ATGAATCT
SLIM1 enriched binding motif (EBM)	M0680_1.02	[A/C/G/T]AATG[T/A]A[C/T]CT[A/C/G/T]	AT1G09165	1	-1000 bp to TSS	755	748	AGATTCAT
SLIM1 enriched binding motif (EBM)	M0680_1.02	[A/C/G/T]AATG[T/A]A[C/T]CT[A/C/G/T]	AT1G09180	1	-1000 bp to TSS	149	142	AGATTCAT
SLIM1 enriched binding motif (EBM)	M0680_1.02	[A/C/G/T]AATG[T/A]A[C/T]CT[A/C/G/T]	AT1G09280	1	-1000 bp to TSS	227	220	AGATTCAT
SLIM1 enriched binding motif (EBM)	M0680_1.02	[A/C/G/T]AATG[T/A]A[C/T]CT[A/C/G/T]	AT1G09400	1	-1000 bp to TSS	853	860	ATGAATCT
SLIM1 enriched binding motif (EBM)	M0680_1.02	[A/C/G/T]AATG[T/A]A[C/T]CT[A/C/G/T]	AT1G09415	1	-1000 bp to TSS	250	243	AGATTCAT
SLIM1 enriched binding motif (EBM)	M0680_1.02	[A/C/G/T]AATG[T/A]A[C/T]CT[A/C/G/T]	AT1G09465	1	-1000 bp to TSS	263	256	AGATTCAT
SLIM1 enriched binding motif (EBM)	M0680_1.02	[A/C/G/T]AATG[T/A]A[C/T]CT[A/C/G/T]	AT1G09487	1	-1000 bp to TSS	479	472	AGATTCAT
SLIM1 enriched binding motif (EBM)	M0680_1.02	[A/C/G/T]AATG[T/A]A[C/T]CT[A/C/G/T]	AT1G09540	1	-1000 bp to TSS	478	485	ATGAATCT
SLIM1 enriched binding motif (EBM)	M0680_1.02	[A/C/G/T]AATG[T/A]A[C/T]CT[A/C/G/T]	AT1G09585	1	-1000 bp to TSS	362	369	ATGAATCT
SLIM1 enriched binding motif (EBM)	M0680_1.02	[A/C/G/T]AATG[T/A]A[C/T]CT[A/C/G/T]	AT1G09637	1	-1000 bp to TSS	660	653	AGATTCAT
SLIM1 enriched binding motif (EBM)	M0680_1.02	[A/C/G/T]AATG[T/A]A[C/T]CT[A/C/G/T]	AT1G09655	1	-1000 bp to TSS	216	209	AGATTCAT
SLIM1 enriched binding motif (EBM)	M0680_1.02	[A/C/G/T]AATG[T/A]A[C/T]CT[A/C/G/T]	AT1G09737	1	-1000 bp to TSS	65	58	AGATTCAT
SLIM1 enriched binding motif (EBM)	M0680_1.02	[A/C/G/T]AATG[T/A]A[C/T]CT[A/C/G/T]	AT1G09767	1	-1000 bp to TSS	136	129	AGATTCAT
SLIM1 enriched binding motif (EBM)	M0680_1.02	[A/C/G/T]AATG[T/A]A[C/T]CT[A/C/G/T]	AT1G09812	1	-1000 bp to TSS	865	858	AGATTCAT
SLIM1 enriched binding motif (EBM)	M0680_1.02	[A/C/G/T]AATG[T/A]A[C/T]CT[A/C/G/T]	AT1G09817	1	-1000 bp to TSS	432	425	AGATTCAT
SLIM1 enriched binding motif (EBM)	M0680_1.02	[A/C/G/T]AATG[T/A]A[C/T]CT[A/C/G/T]	AT1G09827	1	-1000 bp to TSS	299	306	ATGAATCT
SLIM1 enriched binding motif (EBM)	M0680_1.02	[A/C/G/T]AATG[T/A]A[C/T]CT[A/C/G/T]	AT1G09837	1	-1000 bp to TSS	204	211	ATGAATCT
SLIM1 enriched binding motif (EBM)	M0680_1.02	[A/C/G/T]AATG[T/A]A[C/T]CT[A/C/G/T]	AT1G09890	1	-1000 bp to TSS	484	491	ATGAATCT
SLIM1 enriched binding motif (EBM)	M0680_1.02	[A/C/G/T]AATG[T/A]A[C/T]CT[A/C/G/T]	AT1G09897	1	-1000 bp to TSS	588	581	AGATTCAT
SLIM1 enriched binding motif (EBM)	M0680_1.02	[A/C/G/T]AATG[T/A]A[C/T]CT[A/C/G/T]	AT1G09900	1	-1000 bp to TSS	988	981	AGATTCAT
SLIM1 enriched binding motif (EBM)	M0680_1.02	[A/C/G/T]AATG[T/A]A[C/T]CT[A/C/G/T]	AT1G09963	1	-1000 bp to TSS	858	851	AGATTCAT
SLIM1 enriched binding motif (EBM)	M0680_1.02	[A/C/G/T]AATG[T/A]A[C/T]CT[A/C/G/T]	AT1G10300	1	-1000 bp to TSS	534	541	ATGAATCT
SLIM1 enriched binding motif (EBM)	M0680_1.02	[A/C/G/T]AATG[T/A]A[C/T]CT[A/C/G/T]	AT1G10455	1	-1000 bp to TSS	93	100	ATGAATCT
SLIM1 enriched binding motif (EBM)	M0680_1.02	[A/C/G/T]AATG[T/A]A[C/T]CT[A/C/G/T]	AT1G10580	1	-1000 bp to TSS	399	406	ATGAATCT
SLIM1 enriched binding motif (EBM)	M0680_1.02	[A/C/G/T]AATG[T/A]A[C/T]CT[A/C/G/T]	AT1G10630	1	-1000 bp to TSS	381	374	AGATTCAT
SLIM1 enriched binding motif (EBM)	M0680_1.02	[A/C/G/T]AATG[T/A]A[C/T]CT[A/C/G/T]	AT1G10650	1	-1000 bp to TSS	793	800	ATGAATCT
SLIM1 enriched binding motif (EBM)	M0680_1.02	[A/C/G/T]AATG[T/A]A[C/T]CT[A/C/G/T]	AT1G10820	1	-1000 bp to TSS	715	722	ATGAATCT
SLIM1 enriched binding motif (EBM)	M0680_1.02	[A/C/G/T]AATG[T/A]A[C/T]CT[A/C/G/T]	AT1G10930	1	-1000 bp to TSS	899	892	AGATTCAT
SLIM1 enriched binding motif (EBM)	M0680_1.02	[A/C/G/T]AATG[T/A]A[C/T]CT[A/C/G/T]	AT1G11100	1	-1000 bp to TSS	280	287	ATGAATCT
SLIM1 enriched binding motif (EBM)	M0680_1.02	[A/C/G/T]AATG[T/A]A[C/T]CT[A/C/G/T]	AT1G11200	1	-1000 bp to TSS	124	131	ATGAATCT
SLIM1 enriched binding motif (EBM)	M0680_1.02	[A/C/G/T]AATG[T/A]A[C/T]CT[A/C/G/T]	AT1G11290	1	-1000 bp to TSS	984	977	AGATTCAT
SLIM1 enriched binding motif (EBM)	M0680_1.02	[A/C/G/T]AATG[T/A]A[C/T]CT[A/C/G/T]	AT1G11300	1	-1000 bp to TSS	863	870	ATGAATCT
SLIM1 enriched binding motif (EBM)	M0680_1.02	[A/C/G/T]AATG[T/A]A[C/T]CT[A/C/G/T]	AT1G11362	1	-1000 bp to TSS	740	733	AGATTCAT
SLIM1 enriched binding motif (EBM)	M0680_1.02	[A/C/G/T]AATG[T/A]A[C/T]CT[A/C/G/T]	AT1G11510	1	-1000 bp to TSS	127	134	ATGAATCT
SLIM1 enriched binding motif (EBM)	M0680_1.02	[A/C/G/T]AATG[T/A]A[C/T]CT[A/C/G/T]	AT1G11530	1	-1000 bp to TSS	408	401	AGATTCAT
SLIM1 enriched binding motif (EBM)	M0680_1.02	[A/C/G/T]AATG[T/A]A[C/T]CT[A/C/G/T]	AT1G11600	1	-1000 bp to TSS	403	396	AGATTCAT
SLIM1 enriched binding motif (EBM)	M0680_1.02	[A/C/G/T]AATG[T/A]A[C/T]CT[A/C/G/T]	AT1G11655	1	-1000 bp to TSS	106	113	ATGAATCT
SLIM1 enriched binding motif (EBM)	M0680_1.02	[A/C/G/T]AATG[T/A]A[C/T]CT[A/C/G/T]	AT1G11940	1	-1000 bp to TSS	701	694	AGATTCAT
SLIM1 enriched binding motif (EBM)	M0680_1.02	[A/C/G/T]AATG[T/A]A[C/T]CT[A/C/G/T]	AT1G12030	1	-1000 bp to TSS	328	321	AGATTCAT
SLIM1 enriched binding motif (EBM)	M0680_1.02	[A/C/G/T]AATG[T/A]A[C/T]CT[A/C/G/T]	AT1G12060	1	-1000 bp to TSS	321	314	AGATTCAT
SLIM1 enriched binding motif (EBM)	M0680_1.02	[A/C/G/T]AATG[T/A]A[C/T]CT[A/C/G/T]	AT1G12260	1	-1000 bp to TSS	23	30	ATGAATCT
SLIM1 enriched binding motif (EBM)	M0680_1.02	[A/C/G/T]AATG[T/A]A[C/T]CT[A/C/G/T]	AT1G12300	1	-1000 bp to TSS	765	772	ATGAATCT
SLIM1 enriched binding motif (EBM)	M0680_1.02	[A/C/G/T]AATG[T/A]A[C/T]CT[A/C/G/T]	AT1G12320	1	-1000 bp to TSS	860	853	AGATTCAT
SLIM1 enriched binding motif (EBM)	M0680_1.02	[A/C/G/T]AATG[T/A]A[C/T]CT[A/C/G/T]	AT1G12490	1	-1000 bp to TSS	603	610	ATGAATCT
SLIM1 enriched binding motif (EBM)	M0680_1.02	[A/C/G/T]AATG[T/A]A[C/T]CT[A/C/G/T]	AT1G12600	1	-1000 bp to TSS	19	26	ATGAATCT
SLIM1 enriched binding motif (EBM)	M0680_1.02	[A/C/G/T]AATG[T/A]A[C/T]CT[A/C/G/T]	AT1G12640	1	-1000 bp to TSS	498	505	ATGAATCT
SLIM1 enriched binding motif (EBM)	M0680_1.02	[A/C/G/T]AATG[T/A]A[C/T]CT[A/C/G/T]	AT1G12663	1	-1000 bp to TSS	839	846	ATGAATCT
SLIM1 enriched binding motif (EBM)	M0680_1.02	[A/C/G/T]AATG[T/A]A[C/T]CT[A/C/G/T]	AT1G12672	1	-1000 bp to TSS	732	725	AGATTCAT
SLIM1 enriched binding motif (EBM)	M0680_1.02	[A/C/G/T]AATG[T/A]A[C/T]CT[A/C/G/T]	AT1G12870	1	-1000 bp to TSS	79	86	ATGAATCT
SLIM1 enriched binding motif (EBM)	M0680_1.02	[A/C/G/T]AATG[T/A]A[C/T]CT[A/C/G/T]	AT1G12900	1	-1000 bp to TSS	462	469	ATGAATCT
SLIM1 enriched binding motif (EBM)	M0680_1.02	[A/C/G/T]AATG[T/A]A[C/T]CT[A/C/G/T]	AT1G12920	1	-1000 bp to TSS	781	774	AGATTCAT
SLIM1 enriched binding motif (EBM)	M0680_1.02	[A/C/G/T]AATG[T/A]A[C/T]CT[A/C/G/T]	AT1G12940	1	-1000 bp to TSS	346	353	ATGAATCT
SLIM1 enriched binding motif (EBM)	M0680_1.02	[A/C/G/T]AATG[T/A]A[C/T]CT[A/C/G/T]	AT1G13220	1	-1000 bp to TSS	554	547	AGATTCAT
SLIM1 enriched binding motif (EBM)	M0680_1.02	[A/C/G/T]AATG[T/A]A[C/T]CT[A/C/G/T]	AT1G13270	1	-1000 bp to TSS	88	81	AGATTCAT
SLIM1 enriched binding motif (EBM)	M0680_1.02	[A/C/G/T]AATG[T/A]A[C/T]CT[A/C/G/T]	AT1G13410	1	-1000 bp to TSS	113	120	ATGAATCT
SLIM1 enriched binding motif (EBM)	M0680_1.02	[A/C/G/T]AATG[T/A]A[C/T]CT[A/C/G/T]	AT1G13580	1	-1000 bp to TSS	330	323	AGATTCAT
SLIM1 enriched binding motif (EBM)	M0680_1.02	[A/C/G/T]AATG[T/A]A[C/T]CT[A/C/G/T]	AT1G13700	1	-1000 bp to TSS	181	174	AGATTCAT
SLIM1 enriched binding motif (EBM)	M0680_1.02	[A/C/G/T]AATG[T/A]A[C/T]CT[A/C/G/T]	AT1G13710	1	-1000 bp to TSS	408	415	ATGAATCT
SLIM1 enriched binding motif (EBM)	M0680_1.02	[A/C/G/T]AATG[T/A]A[C/T]CT[A/C/G/T]	AT1G13770	1	-1000 bp to TSS	223	230	ATGAATCT
SLIM1 enriched binding motif (EBM)	M0680_1.02	[A/C/G/T]AATG[T/A]A[C/T]CT[A/C/G/T]	AT1G13825	1	-1000 bp to TSS	971	978	ATGAATCT
SLIM1 enriched binding motif (EBM)	M0680_1.02	[A/C/G/T]AATG[T/A]A[C/T]CT[A/C/G/T]	AT1G13920	1	-1000 bp to TSS	803	796	AGATTCAT
SLIM1 enriched binding motif (EBM)	M0680_1.02	[A/C/G/T]AATG[T/A]A[C/T]CT[A/C/G/T]	AT1G13990	1	-1000 bp to TSS	21	14	AGATTCAT
SLIM1 enriched binding motif (EBM)	M0680_1.02	[A/C/G/T]AATG[T/A]A[C/T]CT[A/C/G/T]	AT1G14260	1	-1000 bp to TSS	458	465	ATGAATCT
SLIM1 enriched binding motif (EBM)	M0680_1.02	[A/C/G/T]AATG[T/A]A[C/T]CT[A/C/G/T]	AT1G14400	1	-1000 bp to TSS	461	468	ATGAATCT
SLIM1 enriched binding motif (EBM)	M0680_1.02	[A/C/G/T]AATG[T/A]A[C/T]CT[A/C/G/T]	AT1G14660	1	-1000 bp to TSS	551	558	ATGAATCT
SLIM1 enriched binding motif (EBM)	M0680_1.02	[A/C/G/T]AATG[T/A]A[C/T]CT[A/C/G/T]	AT1G14670	1	-1000 bp to TSS	485	478	AGATTCAT
SLIM1 enriched binding motif (EBM)	M0680_1.02	[A/C/G/T]AATG[T/A]A[C/T]CT[A/C/G/T]	AT1G14685	1	-1000 bp to TSS	288	295	ATGAATCT
SLIM1 enriched binding motif (EBM)	M0680_1.02	[A/C/G/T]AATG[T/A]A[C/T]CT[A/C/G/T]	AT1G14710	1	-1000 bp to TSS	737	730	AGATTCAT
SLIM1 enriched binding motif (EBM)	M0680_1.02	[A/C/G/T]AATG[T/A]A[C/T]CT[A/C/G/T]	AT1G14980	1	-1000 bp to TSS	266	273	ATGAATCT
SLIM1 enriched binding motif (EBM)	M0680_1.02	[A/C/G/T]AATG[T/A]A[C/T]CT[A/C/G/T]	AT1G15000	1	-1000 bp to TSS	211	204	AGATTCAT
SLIM1 enriched binding motif (EBM)	M0680_1.02	[A/C/G/T]AATG[T/A]A[C/T]CT[A/C/G/T]	AT1G15165	1	-1000 bp to TSS	659	666	ATGAATCT
SLIM1 enriched binding motif (EBM)	M0680_1.02	[A/C/G/T]AATG[T/A]A[C/T]CT[A/C/G/T]	AT1G15440	1	-1000 bp to TSS	245	252	ATGAATCT
SLIM1 enriched binding motif (EBM)	M0680_1.02	[A/C/G/T]AATG[T/A]A[C/T]CT[A/C/G/T]	AT1G15450	1	-1000 bp to TSS	405	412	ATGAATCT
SLIM1 enriched binding motif (EBM)	M0680_1.02	[A/C/G/T]AATG[T/A]A[C/T]CT[A/C/G/T]	AT1G15480	1	-1000 bp to TSS	761	754	AGATTCAT
SLIM1 enriched binding motif (EBM)	M0680_1.02	[A/C/G/T]AATG[T/A]A[C/T]CT[A/C/G/T]	AT1G15690	1	-1000 bp to TSS	884	891	ATGAATCT
SLIM1 enriched binding motif (EBM)	M0680_1.02	[A/C/G/T]AATG[T/A]A[C/T]CT[A/C/G/T]	AT1G15700	1	-1000 bp to TSS	714	721	ATGAATCT
SLIM1 enriched binding motif (EBM)	M0680_1.02	[A/C/G/T]AATG[T/A]A[C/T]CT[A/C/G/T]	AT1G15710	1	-1000 bp to TSS	976	969	AGATTCAT
SLIM1 enriched binding motif (EBM)	M0680_1.02	[A/C/G/T]AATG[T/A]A[C/T]CT[A/C/G/T]	AT1G15870	1	-1000 bp to TSS	933	926	AGATTCAT
SLIM1 enriched binding motif (EBM)	M0680_1.02	[A/C/G/T]AATG[T/A]A[C/T]CT[A/C/G/T]	AT1G16020	1	-1000 bp to TSS	586	579	AGATTCAT
SLIM1 enriched binding motif (EBM)	M0680_1.02	[A/C/G/T]AATG[T/A]A[C/T]CT[A/C/G/T]	AT1G16080	1	-1000 bp to TSS	610	617	ATGAATCT
SLIM1 enriched binding motif (EBM)	M0680_1.02	[A/C/G/T]AATG[T/A]A[C/T]CT[A/C/G/T]	AT1G16110	1	-1000 bp to TSS	796	789	AGATTCAT
SLIM1 enriched binding motif (EBM)	M0680_1.02	[A/C/G/T]AATG[T/A]A[C/T]CT[A/C/G/T]	AT1G16130	1	-1000 bp to TSS	45	52	ATGAATCT
SLIM1 enriched binding motif (EBM)	M0680_1.02	[A/C/G/T]AATG[T/A]A[C/T]CT[A/C/G/T]	AT1G16190	1	-1000 bp to TSS	589	596	ATGAATCT
SLIM1 enriched binding motif (EBM)	M0680_1.02	[A/C/G/T]AATG[T/A]A[C/T]CT[A/C/G/T]	AT1G16970	1	-1000 bp to TSS	564	557	AGATTCAT
SLIM1 enriched binding motif (EBM)	M0680_1.02	[A/C/G/T]AATG[T/A]A[C/T]CT[A/C/G/T]	AT1G16980	1	-1000 bp to TSS	49	56	ATGAATCT
SLIM1 enriched binding motif (EBM)	M0680_1.02	[A/C/G/T]AATG[T/A]A[C/T]CT[A/C/G/T]	AT1G17110	1	-1000 bp to TSS	657	650	AGATTCAT
SLIM1 enriched binding motif (EBM)	M0680_1.02	[A/C/G/T]AATG[T/A]A[C/T]CT[A/C/G/T]	AT1G17120	1	-1000 bp to TSS	419	426	ATGAATCT
SLIM1 enriched binding motif (EBM)	M0680_1.02	[A/C/G/T]AATG[T/A]A[C/T]CT[A/C/G/T]	AT1G17145	1	-1000 bp to TSS	115	108	AGATTCAT
SLIM1 enriched binding motif (EBM)	M0680_1.02	[A/C/G/T]AATG[T/A]A[C/T]CT[A/C/G/T]	AT1G17230	1	-1000 bp to TSS	32	25	AGATTCAT
SLIM1 enriched binding motif (EBM)	M0680_1.02	[A/C/G/T]AATG[T/A]A[C/T]CT[A/C/G/T]	AT1G17360	1	-1000 bp to TSS	391	384	AGATTCAT
SLIM1 enriched binding motif (EBM)	M0680_1.02	[A/C/G/T]AATG[T/A]A[C/T]CT[A/C/G/T]	AT1G17420	1	-1000 bp to TSS	274	281	ATGAATCT
SLIM1 enriched binding motif (EBM)	M0680_1.02	[A/C/G/T]AATG[T/A]A[C/T]CT[A/C/G/T]	AT1G17440	1	-1000 bp to TSS	520	513	AGATTCAT
SLIM1 enriched binding motif (EBM)	M0680_1.02	[A/C/G/T]AATG[T/A]A[C/T]CT[A/C/G/T]	AT1G17460	1	-1000 bp to TSS	563	556	AGATTCAT
SLIM1 enriched binding motif (EBM)	M0680_1.02	[A/C/G/T]AATG[T/A]A[C/T]CT[A/C/G/T]	AT1G17480	1	-1000 bp to TSS	168	161	AGATTCAT
SLIM1 enriched binding motif (EBM)	M0680_1.02	[A/C/G/T]AATG[T/A]A[C/T]CT[A/C/G/T]	AT1G17570	1	-1000 bp to TSS	863	870	ATGAATCT
SLIM1 enriched binding motif (EBM)	M0680_1.02	[A/C/G/T]AATG[T/A]A[C/T]CT[A/C/G/T]	AT1G17580	1	-1000 bp to TSS	370	377	ATGAATCT
SLIM1 enriched binding motif (EBM)	M0680_1.02	[A/C/G/T]AATG[T/A]A[C/T]CT[A/C/G/T]	AT1G17650	1	-1000 bp to TSS	566	573	ATGAATCT
SLIM1 enriched binding motif (EBM)	M0680_1.02	[A/C/G/T]AATG[T/A]A[C/T]CT[A/C/G/T]	AT1G17745	1	-1000 bp to TSS	907	914	ATGAATCT
SLIM1 enriched binding motif (EBM)	M0680_1.02	[A/C/G/T]AATG[T/A]A[C/T]CT[A/C/G/T]	AT1G17780	1	-1000 bp to TSS	896	889	AGATTCAT
SLIM1 enriched binding motif (EBM)	M0680_1.02	[A/C/G/T]AATG[T/A]A[C/T]CT[A/C/G/T]	AT1G18140	1	-1000 bp to TSS	532	525	AGATTCAT
SLIM1 enriched binding motif (EBM)	M0680_1.02	[A/C/G/T]AATG[T/A]A[C/T]CT[A/C/G/T]	AT1G18150	1	-1000 bp to TSS	753	746	AGATTCAT
SLIM1 enriched binding motif (EBM)	M0680_1.02	[A/C/G/T]AATG[T/A]A[C/T]CT[A/C/G/T]	AT1G18160	1	-1000 bp to TSS	460	467	ATGAATCT
SLIM1 enriched binding motif (EBM)	M0680_1.02	[A/C/G/T]AATG[T/A]A[C/T]CT[A/C/G/T]	AT1G18170	1	-1000 bp to TSS	567	574	ATGAATCT
SLIM1 enriched binding motif (EBM)	M0680_1.02	[A/C/G/T]AATG[T/A]A[C/T]CT[A/C/G/T]	AT1G18290	1	-1000 bp to TSS	840	847	ATGAATCT
SLIM1 enriched binding motif (EBM)	M0680_1.02	[A/C/G/T]AATG[T/A]A[C/T]CT[A/C/G/T]	AT1G18360	1	-1000 bp to TSS	257	264	ATGAATCT
SLIM1 enriched binding motif (EBM)	M0680_1.02	[A/C/G/T]AATG[T/A]A[C/T]CT[A/C/G/T]	AT1G18400	1	-1000 bp to TSS	409	402	AGATTCAT
SLIM1 enriched binding motif (EBM)	M0680_1.02	[A/C/G/T]AATG[T/A]A[C/T]CT[A/C/G/T]	AT1G18630	1	-1000 bp to TSS	868	875	ATGAATCT
SLIM1 enriched binding motif (EBM)	M0680_1.02	[A/C/G/T]AATG[T/A]A[C/T]CT[A/C/G/T]	AT1G18670	1	-1000 bp to TSS	24	17	AGATTCAT
SLIM1 enriched binding motif (EBM)	M0680_1.02	[A/C/G/T]AATG[T/A]A[C/T]CT[A/C/G/T]	AT1G18735	1	-1000 bp to TSS	155	148	AGATTCAT
SLIM1 enriched binding motif (EBM)	M0680_1.02	[A/C/G/T]AATG[T/A]A[C/T]CT[A/C/G/T]	AT1G18740	1	-1000 bp to TSS	325	332	ATGAATCT
SLIM1 enriched binding motif (EBM)	M0680_1.02	[A/C/G/T]AATG[T/A]A[C/T]CT[A/C/G/T]	AT1G18980	1	-1000 bp to TSS	335	342	ATGAATCT
SLIM1 enriched binding motif (EBM)	M0680_1.02	[A/C/G/T]AATG[T/A]A[C/T]CT[A/C/G/T]	AT1G19110	1	-1000 bp to TSS	193	200	ATGAATCT
SLIM1 enriched binding motif (EBM)	M0680_1.02	[A/C/G/T]AATG[T/A]A[C/T]CT[A/C/G/T]	AT1G19210	1	-1000 bp to TSS	600	607	ATGAATCT
SLIM1 enriched binding motif (EBM)	M0680_1.02	[A/C/G/T]AATG[T/A]A[C/T]CT[A/C/G/T]	AT1G19600	1	-1000 bp to TSS	883	876	AGATTCAT
SLIM1 enriched binding motif (EBM)	M0680_1.02	[A/C/G/T]AATG[T/A]A[C/T]CT[A/C/G/T]	AT1G19610	1	-1000 bp to TSS	800	793	AGATTCAT
SLIM1 enriched binding motif (EBM)	M0680_1.02	[A/C/G/T]AATG[T/A]A[C/T]CT[A/C/G/T]	AT1G19670	1	-1000 bp to TSS	49	56	ATGAATCT
SLIM1 enriched binding motif (EBM)	M0680_1.02	[A/C/G/T]AATG[T/A]A[C/T]CT[A/C/G/T]	AT1G19690	1	-1000 bp to TSS	339	346	ATGAATCT
SLIM1 enriched binding motif (EBM)	M0680_1.02	[A/C/G/T]AATG[T/A]A[C/T]CT[A/C/G/T]	AT1G19930	1	-1000 bp to TSS	637	644	ATGAATCT
SLIM1 enriched binding motif (EBM)	M0680_1.02	[A/C/G/T]AATG[T/A]A[C/T]CT[A/C/G/T]	AT1G20080	1	-1000 bp to TSS	348	355	ATGAATCT
SLIM1 enriched binding motif (EBM)	M0680_1.02	[A/C/G/T]AATG[T/A]A[C/T]CT[A/C/G/T]	AT1G20440	1	-1000 bp to TSS	213	220	ATGAATCT
SLIM1 enriched binding motif (EBM)	M0680_1.02	[A/C/G/T]AATG[T/A]A[C/T]CT[A/C/G/T]	AT1G20450	1	-1000 bp to TSS	1	8	ATGAATCT
SLIM1 enriched binding motif (EBM)	M0680_1.02	[A/C/G/T]AATG[T/A]A[C/T]CT[A/C/G/T]	AT1G20460	1	-1000 bp to TSS	666	659	AGATTCAT
SLIM1 enriched binding motif (EBM)	M0680_1.02	[A/C/G/T]AATG[T/A]A[C/T]CT[A/C/G/T]	AT1G20620	1	-1000 bp to TSS	200	193	AGATTCAT
SLIM1 enriched binding motif (EBM)	M0680_1.02	[A/C/G/T]AATG[T/A]A[C/T]CT[A/C/G/T]	AT1G20790	1	-1000 bp to TSS	182	189	ATGAATCT
SLIM1 enriched binding motif (EBM)	M0680_1.02	[A/C/G/T]AATG[T/A]A[C/T]CT[A/C/G/T]	AT1G21240	1	-1000 bp to TSS	245	252	ATGAATCT
SLIM1 enriched binding motif (EBM)	M0680_1.02	[A/C/G/T]AATG[T/A]A[C/T]CT[A/C/G/T]	AT1G21400	1	-1000 bp to TSS	678	685	ATGAATCT
SLIM1 enriched binding motif (EBM)	M0680_1.02	[A/C/G/T]AATG[T/A]A[C/T]CT[A/C/G/T]	AT1G21520	1	-1000 bp to TSS	216	209	AGATTCAT
SLIM1 enriched binding motif (EBM)	M0680_1.02	[A/C/G/T]AATG[T/A]A[C/T]CT[A/C/G/T]	AT1G21528	1	-1000 bp to TSS	908	901	AGATTCAT
SLIM1 enriched binding motif (EBM)	M0680_1.02	[A/C/G/T]AATG[T/A]A[C/T]CT[A/C/G/T]	AT1G21650	1	-1000 bp to TSS	107	114	ATGAATCT
SLIM1 enriched binding motif (EBM)	M0680_1.02	[A/C/G/T]AATG[T/A]A[C/T]CT[A/C/G/T]	AT1G21651	1	-1000 bp to TSS	93	100	ATGAATCT
SLIM1 enriched binding motif (EBM)	M0680_1.02	[A/C/G/T]AATG[T/A]A[C/T]CT[A/C/G/T]	AT1G21660	1	-1000 bp to TSS	504	497	AGATTCAT
SLIM1 enriched binding motif (EBM)	M0680_1.02	[A/C/G/T]AATG[T/A]A[C/T]CT[A/C/G/T]	AT1G21800	1	-1000 bp to TSS	781	774	AGATTCAT
SLIM1 enriched binding motif (EBM)	M0680_1.02	[A/C/G/T]AATG[T/A]A[C/T]CT[A/C/G/T]	AT1G21866	1	-1000 bp to TSS	337	344	ATGAATCT
SLIM1 enriched binding motif (EBM)	M0680_1.02	[A/C/G/T]AATG[T/A]A[C/T]CT[A/C/G/T]	AT1G21920	1	-1000 bp to TSS	61	54	AGATTCAT
SLIM1 enriched binding motif (EBM)	M0680_1.02	[A/C/G/T]AATG[T/A]A[C/T]CT[A/C/G/T]	AT1G21928	1	-1000 bp to TSS	280	273	AGATTCAT
SLIM1 enriched binding motif (EBM)	M0680_1.02	[A/C/G/T]AATG[T/A]A[C/T]CT[A/C/G/T]	AT1G22040	1	-1000 bp to TSS	120	113	AGATTCAT
SLIM1 enriched binding motif (EBM)	M0680_1.02	[A/C/G/T]AATG[T/A]A[C/T]CT[A/C/G/T]	AT1G22050	1	-1000 bp to TSS	250	243	AGATTCAT
SLIM1 enriched binding motif (EBM)	M0680_1.02	[A/C/G/T]AATG[T/A]A[C/T]CT[A/C/G/T]	AT1G22080	1	-1000 bp to TSS	677	670	AGATTCAT
SLIM1 enriched binding motif (EBM)	M0680_1.02	[A/C/G/T]AATG[T/A]A[C/T]CT[A/C/G/T]	AT1G22270	1	-1000 bp to TSS	267	274	ATGAATCT
SLIM1 enriched binding motif (EBM)	M0680_1.02	[A/C/G/T]AATG[T/A]A[C/T]CT[A/C/G/T]	AT1G22420	1	-1000 bp to TSS	46	39	AGATTCAT
SLIM1 enriched binding motif (EBM)	M0680_1.02	[A/C/G/T]AATG[T/A]A[C/T]CT[A/C/G/T]	AT1G22430	1	-1000 bp to TSS	397	404	ATGAATCT
SLIM1 enriched binding motif (EBM)	M0680_1.02	[A/C/G/T]AATG[T/A]A[C/T]CT[A/C/G/T]	AT1G22760	1	-1000 bp to TSS	873	866	AGATTCAT
SLIM1 enriched binding motif (EBM)	M0680_1.02	[A/C/G/T]AATG[T/A]A[C/T]CT[A/C/G/T]	AT1G22790	1	-1000 bp to TSS	24	31	ATGAATCT
SLIM1 enriched binding motif (EBM)	M0680_1.02	[A/C/G/T]AATG[T/A]A[C/T]CT[A/C/G/T]	AT1G23037	1	-1000 bp to TSS	1	8	ATGAATCT
SLIM1 enriched binding motif (EBM)	M0680_1.02	[A/C/G/T]AATG[T/A]A[C/T]CT[A/C/G/T]	AT1G23052	1	-1000 bp to TSS	60	53	AGATTCAT
SLIM1 enriched binding motif (EBM)	M0680_1.02	[A/C/G/T]AATG[T/A]A[C/T]CT[A/C/G/T]	AT1G23140	1	-1000 bp to TSS	871	878	ATGAATCT
SLIM1 enriched binding motif (EBM)	M0680_1.02	[A/C/G/T]AATG[T/A]A[C/T]CT[A/C/G/T]	AT1G23145	1	-1000 bp to TSS	499	492	AGATTCAT
SLIM1 enriched binding motif (EBM)	M0680_1.02	[A/C/G/T]AATG[T/A]A[C/T]CT[A/C/G/T]	AT1G23350	1	-1000 bp to TSS	36	43	ATGAATCT
SLIM1 enriched binding motif (EBM)	M0680_1.02	[A/C/G/T]AATG[T/A]A[C/T]CT[A/C/G/T]	AT1G23400	1	-1000 bp to TSS	325	332	ATGAATCT
SLIM1 enriched binding motif (EBM)	M0680_1.02	[A/C/G/T]AATG[T/A]A[C/T]CT[A/C/G/T]	AT1G23420	1	-1000 bp to TSS	256	249	AGATTCAT
SLIM1 enriched binding motif (EBM)	M0680_1.02	[A/C/G/T]AATG[T/A]A[C/T]CT[A/C/G/T]	AT1G23440	1	-1000 bp to TSS	160	167	ATGAATCT
SLIM1 enriched binding motif (EBM)	M0680_1.02	[A/C/G/T]AATG[T/A]A[C/T]CT[A/C/G/T]	AT1G23470	1	-1000 bp to TSS	405	412	ATGAATCT
SLIM1 enriched binding motif (EBM)	M0680_1.02	[A/C/G/T]AATG[T/A]A[C/T]CT[A/C/G/T]	AT1G23645	1	-1000 bp to TSS	960	953	AGATTCAT
SLIM1 enriched binding motif (EBM)	M0680_1.02	[A/C/G/T]AATG[T/A]A[C/T]CT[A/C/G/T]	AT1G23690	1	-1000 bp to TSS	775	782	ATGAATCT
SLIM1 enriched binding motif (EBM)	M0680_1.02	[A/C/G/T]AATG[T/A]A[C/T]CT[A/C/G/T]	AT1G23700	1	-1000 bp to TSS	164	157	AGATTCAT
SLIM1 enriched binding motif (EBM)	M0680_1.02	[A/C/G/T]AATG[T/A]A[C/T]CT[A/C/G/T]	AT1G23810	1	-1000 bp to TSS	823	830	ATGAATCT
SLIM1 enriched binding motif (EBM)	M0680_1.02	[A/C/G/T]AATG[T/A]A[C/T]CT[A/C/G/T]	AT1G23850	1	-1000 bp to TSS	601	608	ATGAATCT
SLIM1 enriched binding motif (EBM)	M0680_1.02	[A/C/G/T]AATG[T/A]A[C/T]CT[A/C/G/T]	AT1G24060	1	-1000 bp to TSS	852	859	ATGAATCT
SLIM1 enriched binding motif (EBM)	M0680_1.02	[A/C/G/T]AATG[T/A]A[C/T]CT[A/C/G/T]	AT1G24062	1	-1000 bp to TSS	135	128	AGATTCAT
SLIM1 enriched binding motif (EBM)	M0680_1.02	[A/C/G/T]AATG[T/A]A[C/T]CT[A/C/G/T]	AT1G24068	1	-1000 bp to TSS	972	965	AGATTCAT
SLIM1 enriched binding motif (EBM)	M0680_1.02	[A/C/G/T]AATG[T/A]A[C/T]CT[A/C/G/T]	AT1G24090	1	-1000 bp to TSS	250	257	ATGAATCT
SLIM1 enriched binding motif (EBM)	M0680_1.02	[A/C/G/T]AATG[T/A]A[C/T]CT[A/C/G/T]	AT1G24147	1	-1000 bp to TSS	607	614	ATGAATCT
SLIM1 enriched binding motif (EBM)	M0680_1.02	[A/C/G/T]AATG[T/A]A[C/T]CT[A/C/G/T]	AT1G24150	1	-1000 bp to TSS	179	172	AGATTCAT
SLIM1 enriched binding motif (EBM)	M0680_1.02	[A/C/G/T]AATG[T/A]A[C/T]CT[A/C/G/T]	AT1G24570	1	-1000 bp to TSS	93	100	ATGAATCT
SLIM1 enriched binding motif (EBM)	M0680_1.02	[A/C/G/T]AATG[T/A]A[C/T]CT[A/C/G/T]	AT1G24764	1	-1000 bp to TSS	404	397	AGATTCAT
SLIM1 enriched binding motif (EBM)	M0680_1.02	[A/C/G/T]AATG[T/A]A[C/T]CT[A/C/G/T]	AT1G24807	1	-1000 bp to TSS	2	9	ATGAATCT
SLIM1 enriched binding motif (EBM)	M0680_1.02	[A/C/G/T]AATG[T/A]A[C/T]CT[A/C/G/T]	AT1G24880	1	-1000 bp to TSS	320	327	ATGAATCT
SLIM1 enriched binding motif (EBM)	M0680_1.02	[A/C/G/T]AATG[T/A]A[C/T]CT[A/C/G/T]	AT1G24909	1	-1000 bp to TSS	2	9	ATGAATCT
SLIM1 enriched binding motif (EBM)	M0680_1.02	[A/C/G/T]AATG[T/A]A[C/T]CT[A/C/G/T]	AT1G25083	1	-1000 bp to TSS	2	9	ATGAATCT
SLIM1 enriched binding motif (EBM)	M0680_1.02	[A/C/G/T]AATG[T/A]A[C/T]CT[A/C/G/T]	AT1G25098	1	-1000 bp to TSS	434	441	ATGAATCT
SLIM1 enriched binding motif (EBM)	M0680_1.02	[A/C/G/T]AATG[T/A]A[C/T]CT[A/C/G/T]	AT1G25155	1	-1000 bp to TSS	2	9	ATGAATCT
SLIM1 enriched binding motif (EBM)	M0680_1.02	[A/C/G/T]AATG[T/A]A[C/T]CT[A/C/G/T]	AT1G25175	1	-1000 bp to TSS	524	531	ATGAATCT
SLIM1 enriched binding motif (EBM)	M0680_1.02	[A/C/G/T]AATG[T/A]A[C/T]CT[A/C/G/T]	AT1G25209	1	-1000 bp to TSS	392	385	AGATTCAT
SLIM1 enriched binding motif (EBM)	M0680_1.02	[A/C/G/T]AATG[T/A]A[C/T]CT[A/C/G/T]	AT1G25220	1	-1000 bp to TSS	614	621	ATGAATCT
SLIM1 enriched binding motif (EBM)	M0680_1.02	[A/C/G/T]AATG[T/A]A[C/T]CT[A/C/G/T]	AT1G25360	1	-1000 bp to TSS	107	100	AGATTCAT
SLIM1 enriched binding motif (EBM)	M0680_1.02	[A/C/G/T]AATG[T/A]A[C/T]CT[A/C/G/T]	AT1G25425	1	-1000 bp to TSS	709	702	AGATTCAT
SLIM1 enriched binding motif (EBM)	M0680_1.02	[A/C/G/T]AATG[T/A]A[C/T]CT[A/C/G/T]	AT1G26130	1	-1000 bp to TSS	207	200	AGATTCAT
SLIM1 enriched binding motif (EBM)	M0680_1.02	[A/C/G/T]AATG[T/A]A[C/T]CT[A/C/G/T]	AT1G26170	1	-1000 bp to TSS	880	873	AGATTCAT
SLIM1 enriched binding motif (EBM)	M0680_1.02	[A/C/G/T]AATG[T/A]A[C/T]CT[A/C/G/T]	AT1G26230	1	-1000 bp to TSS	501	494	AGATTCAT
SLIM1 enriched binding motif (EBM)	M0680_1.02	[A/C/G/T]AATG[T/A]A[C/T]CT[A/C/G/T]	AT1G26400	1	-1000 bp to TSS	364	357	AGATTCAT
SLIM1 enriched binding motif (EBM)	M0680_1.02	[A/C/G/T]AATG[T/A]A[C/T]CT[A/C/G/T]	AT1G26550	1	-1000 bp to TSS	473	480	ATGAATCT
SLIM1 enriched binding motif (EBM)	M0680_1.02	[A/C/G/T]AATG[T/A]A[C/T]CT[A/C/G/T]	AT1G26600	1	-1000 bp to TSS	439	432	AGATTCAT
SLIM1 enriched binding motif (EBM)	M0680_1.02	[A/C/G/T]AATG[T/A]A[C/T]CT[A/C/G/T]	AT1G26780	1	-1000 bp to TSS	279	272	AGATTCAT
SLIM1 enriched binding motif (EBM)	M0680_1.02	[A/C/G/T]AATG[T/A]A[C/T]CT[A/C/G/T]	AT1G26940	1	-1000 bp to TSS	216	223	ATGAATCT
SLIM1 enriched binding motif (EBM)	M0680_1.02	[A/C/G/T]AATG[T/A]A[C/T]CT[A/C/G/T]	AT1G27100	1	-1000 bp to TSS	731	738	ATGAATCT
SLIM1 enriched binding motif (EBM)	M0680_1.02	[A/C/G/T]AATG[T/A]A[C/T]CT[A/C/G/T]	AT1G27130	1	-1000 bp to TSS	134	127	AGATTCAT
SLIM1 enriched binding motif (EBM)	M0680_1.02	[A/C/G/T]AATG[T/A]A[C/T]CT[A/C/G/T]	AT1G27270	1	-1000 bp to TSS	819	826	ATGAATCT
SLIM1 enriched binding motif (EBM)	M0680_1.02	[A/C/G/T]AATG[T/A]A[C/T]CT[A/C/G/T]	AT1G27370	1	-1000 bp to TSS	433	426	AGATTCAT
SLIM1 enriched binding motif (EBM)	M0680_1.02	[A/C/G/T]AATG[T/A]A[C/T]CT[A/C/G/T]	AT1G27530	1	-1000 bp to TSS	465	458	AGATTCAT
SLIM1 enriched binding motif (EBM)	M0680_1.02	[A/C/G/T]AATG[T/A]A[C/T]CT[A/C/G/T]	AT1G27535	1	-1000 bp to TSS	842	849	ATGAATCT
SLIM1 enriched binding motif (EBM)	M0680_1.02	[A/C/G/T]AATG[T/A]A[C/T]CT[A/C/G/T]	AT1G27760	1	-1000 bp to TSS	4	11	ATGAATCT
SLIM1 enriched binding motif (EBM)	M0680_1.02	[A/C/G/T]AATG[T/A]A[C/T]CT[A/C/G/T]	AT1G28030	1	-1000 bp to TSS	261	268	ATGAATCT
SLIM1 enriched binding motif (EBM)	M0680_1.02	[A/C/G/T]AATG[T/A]A[C/T]CT[A/C/G/T]	AT1G28100	1	-1000 bp to TSS	259	266	ATGAATCT
SLIM1 enriched binding motif (EBM)	M0680_1.02	[A/C/G/T]AATG[T/A]A[C/T]CT[A/C/G/T]	AT1G28250	1	-1000 bp to TSS	794	787	AGATTCAT
SLIM1 enriched binding motif (EBM)	M0680_1.02	[A/C/G/T]AATG[T/A]A[C/T]CT[A/C/G/T]	AT1G28280	1	-1000 bp to TSS	194	187	AGATTCAT
SLIM1 enriched binding motif (EBM)	M0680_1.02	[A/C/G/T]AATG[T/A]A[C/T]CT[A/C/G/T]	AT1G28390	1	-1000 bp to TSS	904	911	ATGAATCT
SLIM1 enriched binding motif (EBM)	M0680_1.02	[A/C/G/T]AATG[T/A]A[C/T]CT[A/C/G/T]	AT1G28447	1	-1000 bp to TSS	967	974	ATGAATCT
SLIM1 enriched binding motif (EBM)	M0680_1.02	[A/C/G/T]AATG[T/A]A[C/T]CT[A/C/G/T]	AT1G28450	1	-1000 bp to TSS	167	174	ATGAATCT
SLIM1 enriched binding motif (EBM)	M0680_1.02	[A/C/G/T]AATG[T/A]A[C/T]CT[A/C/G/T]	AT1G28455	1	-1000 bp to TSS	946	953	ATGAATCT
SLIM1 enriched binding motif (EBM)	M0680_1.02	[A/C/G/T]AATG[T/A]A[C/T]CT[A/C/G/T]	AT1G28490	1	-1000 bp to TSS	786	793	ATGAATCT
SLIM1 enriched binding motif (EBM)	M0680_1.02	[A/C/G/T]AATG[T/A]A[C/T]CT[A/C/G/T]	AT1G28620	1	-1000 bp to TSS	589	582	AGATTCAT
SLIM1 enriched binding motif (EBM)	M0680_1.02	[A/C/G/T]AATG[T/A]A[C/T]CT[A/C/G/T]	AT1G28770	1	-1000 bp to TSS	847	840	AGATTCAT
SLIM1 enriched binding motif (EBM)	M0680_1.02	[A/C/G/T]AATG[T/A]A[C/T]CT[A/C/G/T]	AT1G28790	1	-1000 bp to TSS	313	306	AGATTCAT
SLIM1 enriched binding motif (EBM)	M0680_1.02	[A/C/G/T]AATG[T/A]A[C/T]CT[A/C/G/T]	AT1G28970	1	-1000 bp to TSS	615	608	AGATTCAT
SLIM1 enriched binding motif (EBM)	M0680_1.02	[A/C/G/T]AATG[T/A]A[C/T]CT[A/C/G/T]	AT1G29070	1	-1000 bp to TSS	119	126	ATGAATCT
SLIM1 enriched binding motif (EBM)	M0680_1.02	[A/C/G/T]AATG[T/A]A[C/T]CT[A/C/G/T]	AT1G29420	1	-1000 bp to TSS	551	558	ATGAATCT
SLIM1 enriched binding motif (EBM)	M0680_1.02	[A/C/G/T]AATG[T/A]A[C/T]CT[A/C/G/T]	AT1G29440	1	-1000 bp to TSS	383	390	ATGAATCT
SLIM1 enriched binding motif (EBM)	M0680_1.02	[A/C/G/T]AATG[T/A]A[C/T]CT[A/C/G/T]	AT1G29450	1	-1000 bp to TSS	902	895	AGATTCAT
SLIM1 enriched binding motif (EBM)	M0680_1.02	[A/C/G/T]AATG[T/A]A[C/T]CT[A/C/G/T]	AT1G29490	1	-1000 bp to TSS	797	790	AGATTCAT
SLIM1 enriched binding motif (EBM)	M0680_1.02	[A/C/G/T]AATG[T/A]A[C/T]CT[A/C/G/T]	AT1G29550	1	-1000 bp to TSS	826	819	AGATTCAT
SLIM1 enriched binding motif (EBM)	M0680_1.02	[A/C/G/T]AATG[T/A]A[C/T]CT[A/C/G/T]	AT1G29850	1	-1000 bp to TSS	716	709	AGATTCAT
SLIM1 enriched binding motif (EBM)	M0680_1.02	[A/C/G/T]AATG[T/A]A[C/T]CT[A/C/G/T]	AT1G29860	1	-1000 bp to TSS	644	651	ATGAATCT
SLIM1 enriched binding motif (EBM)	M0680_1.02	[A/C/G/T]AATG[T/A]A[C/T]CT[A/C/G/T]	AT1G29890	1	-1000 bp to TSS	134	141	ATGAATCT
SLIM1 enriched binding motif (EBM)	M0680_1.02	[A/C/G/T]AATG[T/A]A[C/T]CT[A/C/G/T]	AT1G29940	1	-1000 bp to TSS	70	63	AGATTCAT
SLIM1 enriched binding motif (EBM)	M0680_1.02	[A/C/G/T]AATG[T/A]A[C/T]CT[A/C/G/T]	AT1G30060	1	-1000 bp to TSS	741	734	AGATTCAT
SLIM1 enriched binding motif (EBM)	M0680_1.02	[A/C/G/T]AATG[T/A]A[C/T]CT[A/C/G/T]	AT1G30190	1	-1000 bp to TSS	962	969	ATGAATCT
SLIM1 enriched binding motif (EBM)	M0680_1.02	[A/C/G/T]AATG[T/A]A[C/T]CT[A/C/G/T]	AT1G30300	1	-1000 bp to TSS	359	352	AGATTCAT
SLIM1 enriched binding motif (EBM)	M0680_1.02	[A/C/G/T]AATG[T/A]A[C/T]CT[A/C/G/T]	AT1G30420	1	-1000 bp to TSS	612	605	AGATTCAT
SLIM1 enriched binding motif (EBM)	M0680_1.02	[A/C/G/T]AATG[T/A]A[C/T]CT[A/C/G/T]	AT1G30455	1	-1000 bp to TSS	11	4	AGATTCAT
SLIM1 enriched binding motif (EBM)	M0680_1.02	[A/C/G/T]AATG[T/A]A[C/T]CT[A/C/G/T]	AT1G30500	1	-1000 bp to TSS	718	711	AGATTCAT
SLIM1 enriched binding motif (EBM)	M0680_1.02	[A/C/G/T]AATG[T/A]A[C/T]CT[A/C/G/T]	AT1G30550	1	-1000 bp to TSS	563	556	AGATTCAT
SLIM1 enriched binding motif (EBM)	M0680_1.02	[A/C/G/T]AATG[T/A]A[C/T]CT[A/C/G/T]	AT1G30560	1	-1000 bp to TSS	705	712	ATGAATCT
SLIM1 enriched binding motif (EBM)	M0680_1.02	[A/C/G/T]AATG[T/A]A[C/T]CT[A/C/G/T]	AT1G30650	1	-1000 bp to TSS	798	805	ATGAATCT
SLIM1 enriched binding motif (EBM)	M0680_1.02	[A/C/G/T]AATG[T/A]A[C/T]CT[A/C/G/T]	AT1G30740	1	-1000 bp to TSS	229	222	AGATTCAT
SLIM1 enriched binding motif (EBM)	M0680_1.02	[A/C/G/T]AATG[T/A]A[C/T]CT[A/C/G/T]	AT1G30784	1	-1000 bp to TSS	179	186	ATGAATCT
SLIM1 enriched binding motif (EBM)	M0680_1.02	[A/C/G/T]AATG[T/A]A[C/T]CT[A/C/G/T]	AT1G30830	1	-1000 bp to TSS	609	616	ATGAATCT
SLIM1 enriched binding motif (EBM)	M0680_1.02	[A/C/G/T]AATG[T/A]A[C/T]CT[A/C/G/T]	AT1G30910	1	-1000 bp to TSS	503	510	ATGAATCT
SLIM1 enriched binding motif (EBM)	M0680_1.02	[A/C/G/T]AATG[T/A]A[C/T]CT[A/C/G/T]	AT1G30920	1	-1000 bp to TSS	438	445	ATGAATCT
SLIM1 enriched binding motif (EBM)	M0680_1.02	[A/C/G/T]AATG[T/A]A[C/T]CT[A/C/G/T]	AT1G30935	1	-1000 bp to TSS	586	593	ATGAATCT
SLIM1 enriched binding motif (EBM)	M0680_1.02	[A/C/G/T]AATG[T/A]A[C/T]CT[A/C/G/T]	AT1G31000	1	-1000 bp to TSS	241	248	ATGAATCT
SLIM1 enriched binding motif (EBM)	M0680_1.02	[A/C/G/T]AATG[T/A]A[C/T]CT[A/C/G/T]	AT1G31090	1	-1000 bp to TSS	757	750	AGATTCAT
SLIM1 enriched binding motif (EBM)	M0680_1.02	[A/C/G/T]AATG[T/A]A[C/T]CT[A/C/G/T]	AT1G31095	1	-1000 bp to TSS	978	971	AGATTCAT
SLIM1 enriched binding motif (EBM)	M0680_1.02	[A/C/G/T]AATG[T/A]A[C/T]CT[A/C/G/T]	AT1G31130	1	-1000 bp to TSS	830	823	AGATTCAT
SLIM1 enriched binding motif (EBM)	M0680_1.02	[A/C/G/T]AATG[T/A]A[C/T]CT[A/C/G/T]	AT1G31230	1	-1000 bp to TSS	864	871	ATGAATCT
SLIM1 enriched binding motif (EBM)	M0680_1.02	[A/C/G/T]AATG[T/A]A[C/T]CT[A/C/G/T]	AT1G31360	1	-1000 bp to TSS	847	840	AGATTCAT
SLIM1 enriched binding motif (EBM)	M0680_1.02	[A/C/G/T]AATG[T/A]A[C/T]CT[A/C/G/T]	AT1G31555	1	-1000 bp to TSS	114	107	AGATTCAT
SLIM1 enriched binding motif (EBM)	M0680_1.02	[A/C/G/T]AATG[T/A]A[C/T]CT[A/C/G/T]	AT1G31630	1	-1000 bp to TSS	519	512	AGATTCAT
SLIM1 enriched binding motif (EBM)	M0680_1.02	[A/C/G/T]AATG[T/A]A[C/T]CT[A/C/G/T]	AT1G31780	1	-1000 bp to TSS	349	342	AGATTCAT
SLIM1 enriched binding motif (EBM)	M0680_1.02	[A/C/G/T]AATG[T/A]A[C/T]CT[A/C/G/T]	AT1G31800	1	-1000 bp to TSS	621	614	AGATTCAT
SLIM1 enriched binding motif (EBM)	M0680_1.02	[A/C/G/T]AATG[T/A]A[C/T]CT[A/C/G/T]	AT1G31885	1	-1000 bp to TSS	183	190	ATGAATCT
SLIM1 enriched binding motif (EBM)	M0680_1.02	[A/C/G/T]AATG[T/A]A[C/T]CT[A/C/G/T]	AT1G31970	1	-1000 bp to TSS	769	762	AGATTCAT
SLIM1 enriched binding motif (EBM)	M0680_1.02	[A/C/G/T]AATG[T/A]A[C/T]CT[A/C/G/T]	AT1G32049	1	-1000 bp to TSS	156	149	AGATTCAT
SLIM1 enriched binding motif (EBM)	M0680_1.02	[A/C/G/T]AATG[T/A]A[C/T]CT[A/C/G/T]	AT1G32070	1	-1000 bp to TSS	214	207	AGATTCAT
SLIM1 enriched binding motif (EBM)	M0680_1.02	[A/C/G/T]AATG[T/A]A[C/T]CT[A/C/G/T]	AT1G32120	1	-1000 bp to TSS	136	143	ATGAATCT
SLIM1 enriched binding motif (EBM)	M0680_1.02	[A/C/G/T]AATG[T/A]A[C/T]CT[A/C/G/T]	AT1G32130	1	-1000 bp to TSS	645	638	AGATTCAT
SLIM1 enriched binding motif (EBM)	M0680_1.02	[A/C/G/T]AATG[T/A]A[C/T]CT[A/C/G/T]	AT1G32210	1	-1000 bp to TSS	119	126	ATGAATCT
SLIM1 enriched binding motif (EBM)	M0680_1.02	[A/C/G/T]AATG[T/A]A[C/T]CT[A/C/G/T]	AT1G32361	1	-1000 bp to TSS	131	138	ATGAATCT
SLIM1 enriched binding motif (EBM)	M0680_1.02	[A/C/G/T]AATG[T/A]A[C/T]CT[A/C/G/T]	AT1G32440	1	-1000 bp to TSS	661	654	AGATTCAT
SLIM1 enriched binding motif (EBM)	M0680_1.02	[A/C/G/T]AATG[T/A]A[C/T]CT[A/C/G/T]	AT1G32600	1	-1000 bp to TSS	571	564	AGATTCAT
SLIM1 enriched binding motif (EBM)	M0680_1.02	[A/C/G/T]AATG[T/A]A[C/T]CT[A/C/G/T]	AT1G33230	1	-1000 bp to TSS	924	931	ATGAATCT
SLIM1 enriched binding motif (EBM)	M0680_1.02	[A/C/G/T]AATG[T/A]A[C/T]CT[A/C/G/T]	AT1G33280	1	-1000 bp to TSS	588	581	AGATTCAT
SLIM1 enriched binding motif (EBM)	M0680_1.02	[A/C/G/T]AATG[T/A]A[C/T]CT[A/C/G/T]	AT1G33480	1	-1000 bp to TSS	987	994	ATGAATCT
SLIM1 enriched binding motif (EBM)	M0680_1.02	[A/C/G/T]AATG[T/A]A[C/T]CT[A/C/G/T]	AT1G33600	1	-1000 bp to TSS	792	799	ATGAATCT
SLIM1 enriched binding motif (EBM)	M0680_1.02	[A/C/G/T]AATG[T/A]A[C/T]CT[A/C/G/T]	AT1G33785	1	-1000 bp to TSS	181	188	ATGAATCT
SLIM1 enriched binding motif (EBM)	M0680_1.02	[A/C/G/T]AATG[T/A]A[C/T]CT[A/C/G/T]	AT1G33800	1	-1000 bp to TSS	543	550	ATGAATCT
SLIM1 enriched binding motif (EBM)	M0680_1.02	[A/C/G/T]AATG[T/A]A[C/T]CT[A/C/G/T]	AT1G34050	1	-1000 bp to TSS	415	408	AGATTCAT
SLIM1 enriched binding motif (EBM)	M0680_1.02	[A/C/G/T]AATG[T/A]A[C/T]CT[A/C/G/T]	AT1G34130	1	-1000 bp to TSS	219	226	ATGAATCT
SLIM1 enriched binding motif (EBM)	M0680_1.02	[A/C/G/T]AATG[T/A]A[C/T]CT[A/C/G/T]	AT1G34490	1	-1000 bp to TSS	642	649	ATGAATCT
SLIM1 enriched binding motif (EBM)	M0680_1.02	[A/C/G/T]AATG[T/A]A[C/T]CT[A/C/G/T]	AT1G35200	1	-1000 bp to TSS	612	619	ATGAATCT
SLIM1 enriched binding motif (EBM)	M0680_1.02	[A/C/G/T]AATG[T/A]A[C/T]CT[A/C/G/T]	AT1G35340	1	-1000 bp to TSS	261	268	ATGAATCT
SLIM1 enriched binding motif (EBM)	M0680_1.02	[A/C/G/T]AATG[T/A]A[C/T]CT[A/C/G/T]	AT1G35500	1	-1000 bp to TSS	651	644	AGATTCAT
SLIM1 enriched binding motif (EBM)	M0680_1.02	[A/C/G/T]AATG[T/A]A[C/T]CT[A/C/G/T]	AT1G35510	1	-1000 bp to TSS	302	295	AGATTCAT
SLIM1 enriched binding motif (EBM)	M0680_1.02	[A/C/G/T]AATG[T/A]A[C/T]CT[A/C/G/T]	AT1G35660	1	-1000 bp to TSS	768	775	ATGAATCT
SLIM1 enriched binding motif (EBM)	M0680_1.02	[A/C/G/T]AATG[T/A]A[C/T]CT[A/C/G/T]	AT1G35750	1	-1000 bp to TSS	556	549	AGATTCAT
SLIM1 enriched binding motif (EBM)	M0680_1.02	[A/C/G/T]AATG[T/A]A[C/T]CT[A/C/G/T]	AT1G36070	1	-1000 bp to TSS	168	175	ATGAATCT
SLIM1 enriched binding motif (EBM)	M0680_1.02	[A/C/G/T]AATG[T/A]A[C/T]CT[A/C/G/T]	AT1G36272	1	-1000 bp to TSS	206	199	AGATTCAT
SLIM1 enriched binding motif (EBM)	M0680_1.02	[A/C/G/T]AATG[T/A]A[C/T]CT[A/C/G/T]	AT1G36370	1	-1000 bp to TSS	884	891	ATGAATCT
SLIM1 enriched binding motif (EBM)	M0680_1.02	[A/C/G/T]AATG[T/A]A[C/T]CT[A/C/G/T]	AT1G36622	1	-1000 bp to TSS	969	962	AGATTCAT
SLIM1 enriched binding motif (EBM)	M0680_1.02	[A/C/G/T]AATG[T/A]A[C/T]CT[A/C/G/T]	AT1G36710	1	-1000 bp to TSS	985	978	AGATTCAT
SLIM1 enriched binding motif (EBM)	M0680_1.02	[A/C/G/T]AATG[T/A]A[C/T]CT[A/C/G/T]	AT1G36920	1	-1000 bp to TSS	521	528	ATGAATCT
SLIM1 enriched binding motif (EBM)	M0680_1.02	[A/C/G/T]AATG[T/A]A[C/T]CT[A/C/G/T]	AT1G40087	1	-1000 bp to TSS	797	790	AGATTCAT
SLIM1 enriched binding motif (EBM)	M0680_1.02	[A/C/G/T]AATG[T/A]A[C/T]CT[A/C/G/T]	AT1G43040	1	-1000 bp to TSS	650	657	ATGAATCT
SLIM1 enriched binding motif (EBM)	M0680_1.02	[A/C/G/T]AATG[T/A]A[C/T]CT[A/C/G/T]	AT1G43130	1	-1000 bp to TSS	542	535	AGATTCAT
SLIM1 enriched binding motif (EBM)	M0680_1.02	[A/C/G/T]AATG[T/A]A[C/T]CT[A/C/G/T]	AT1G43160	1	-1000 bp to TSS	417	424	ATGAATCT
SLIM1 enriched binding motif (EBM)	M0680_1.02	[A/C/G/T]AATG[T/A]A[C/T]CT[A/C/G/T]	AT1G43415	1	-1000 bp to TSS	561	568	ATGAATCT
SLIM1 enriched binding motif (EBM)	M0680_1.02	[A/C/G/T]AATG[T/A]A[C/T]CT[A/C/G/T]	AT1G43790	1	-1000 bp to TSS	890	897	ATGAATCT
SLIM1 enriched binding motif (EBM)	M0680_1.02	[A/C/G/T]AATG[T/A]A[C/T]CT[A/C/G/T]	AT1G44740	1	-1000 bp to TSS	543	550	ATGAATCT
SLIM1 enriched binding motif (EBM)	M0680_1.02	[A/C/G/T]AATG[T/A]A[C/T]CT[A/C/G/T]	AT1G45165	1	-1000 bp to TSS	51	58	ATGAATCT
SLIM1 enriched binding motif (EBM)	M0680_1.02	[A/C/G/T]AATG[T/A]A[C/T]CT[A/C/G/T]	AT1G45215	1	-1000 bp to TSS	233	226	AGATTCAT
SLIM1 enriched binding motif (EBM)	M0680_1.02	[A/C/G/T]AATG[T/A]A[C/T]CT[A/C/G/T]	AT1G45221	1	-1000 bp to TSS	233	226	AGATTCAT
SLIM1 enriched binding motif (EBM)	M0680_1.02	[A/C/G/T]AATG[T/A]A[C/T]CT[A/C/G/T]	AT1G45223	1	-1000 bp to TSS	233	226	AGATTCAT
SLIM1 enriched binding motif (EBM)	M0680_1.02	[A/C/G/T]AATG[T/A]A[C/T]CT[A/C/G/T]	AT1G45225	1	-1000 bp to TSS	225	218	AGATTCAT
SLIM1 enriched binding motif (EBM)	M0680_1.02	[A/C/G/T]AATG[T/A]A[C/T]CT[A/C/G/T]	AT1G45227	1	-1000 bp to TSS	215	208	AGATTCAT
SLIM1 enriched binding motif (EBM)	M0680_1.02	[A/C/G/T]AATG[T/A]A[C/T]CT[A/C/G/T]	AT1G45242	1	-1000 bp to TSS	881	874	AGATTCAT
SLIM1 enriched binding motif (EBM)	M0680_1.02	[A/C/G/T]AATG[T/A]A[C/T]CT[A/C/G/T]	AT1G45244	1	-1000 bp to TSS	440	433	AGATTCAT
SLIM1 enriched binding motif (EBM)	M0680_1.02	[A/C/G/T]AATG[T/A]A[C/T]CT[A/C/G/T]	AT1G45332	1	-1000 bp to TSS	217	210	AGATTCAT
SLIM1 enriched binding motif (EBM)	M0680_1.02	[A/C/G/T]AATG[T/A]A[C/T]CT[A/C/G/T]	AT1G47240	1	-1000 bp to TSS	724	731	ATGAATCT
SLIM1 enriched binding motif (EBM)	M0680_1.02	[A/C/G/T]AATG[T/A]A[C/T]CT[A/C/G/T]	AT1G47490	1	-1000 bp to TSS	94	87	AGATTCAT
SLIM1 enriched binding motif (EBM)	M0680_1.02	[A/C/G/T]AATG[T/A]A[C/T]CT[A/C/G/T]	AT1G47580	1	-1000 bp to TSS	145	138	AGATTCAT
SLIM1 enriched binding motif (EBM)	M0680_1.02	[A/C/G/T]AATG[T/A]A[C/T]CT[A/C/G/T]	AT1G47630	1	-1000 bp to TSS	839	832	AGATTCAT
SLIM1 enriched binding motif (EBM)	M0680_1.02	[A/C/G/T]AATG[T/A]A[C/T]CT[A/C/G/T]	AT1G47640	1	-1000 bp to TSS	179	172	AGATTCAT
SLIM1 enriched binding motif (EBM)	M0680_1.02	[A/C/G/T]AATG[T/A]A[C/T]CT[A/C/G/T]	AT1G47730	1	-1000 bp to TSS	266	273	ATGAATCT
SLIM1 enriched binding motif (EBM)	M0680_1.02	[A/C/G/T]AATG[T/A]A[C/T]CT[A/C/G/T]	AT1G47780	1	-1000 bp to TSS	382	389	ATGAATCT
SLIM1 enriched binding motif (EBM)	M0680_1.02	[A/C/G/T]AATG[T/A]A[C/T]CT[A/C/G/T]	AT1G48130	1	-1000 bp to TSS	305	298	AGATTCAT
SLIM1 enriched binding motif (EBM)	M0680_1.02	[A/C/G/T]AATG[T/A]A[C/T]CT[A/C/G/T]	AT1G48285	1	-1000 bp to TSS	28	35	ATGAATCT
SLIM1 enriched binding motif (EBM)	M0680_1.02	[A/C/G/T]AATG[T/A]A[C/T]CT[A/C/G/T]	AT1G48300	1	-1000 bp to TSS	863	856	AGATTCAT
SLIM1 enriched binding motif (EBM)	M0680_1.02	[A/C/G/T]AATG[T/A]A[C/T]CT[A/C/G/T]	AT1G48430	1	-1000 bp to TSS	345	338	AGATTCAT
SLIM1 enriched binding motif (EBM)	M0680_1.02	[A/C/G/T]AATG[T/A]A[C/T]CT[A/C/G/T]	AT1G48440	1	-1000 bp to TSS	171	164	AGATTCAT
SLIM1 enriched binding motif (EBM)	M0680_1.02	[A/C/G/T]AATG[T/A]A[C/T]CT[A/C/G/T]	AT1G48470	1	-1000 bp to TSS	830	837	ATGAATCT
SLIM1 enriched binding motif (EBM)	M0680_1.02	[A/C/G/T]AATG[T/A]A[C/T]CT[A/C/G/T]	AT1G48742	1	-1000 bp to TSS	127	120	AGATTCAT
SLIM1 enriched binding motif (EBM)	M0680_1.02	[A/C/G/T]AATG[T/A]A[C/T]CT[A/C/G/T]	AT1G48745	1	-1000 bp to TSS	906	899	AGATTCAT
SLIM1 enriched binding motif (EBM)	M0680_1.02	[A/C/G/T]AATG[T/A]A[C/T]CT[A/C/G/T]	AT1G48840	1	-1000 bp to TSS	554	561	ATGAATCT
SLIM1 enriched binding motif (EBM)	M0680_1.02	[A/C/G/T]AATG[T/A]A[C/T]CT[A/C/G/T]	AT1G49110	1	-1000 bp to TSS	710	717	ATGAATCT
SLIM1 enriched binding motif (EBM)	M0680_1.02	[A/C/G/T]AATG[T/A]A[C/T]CT[A/C/G/T]	AT1G49120	1	-1000 bp to TSS	844	851	ATGAATCT
SLIM1 enriched binding motif (EBM)	M0680_1.02	[A/C/G/T]AATG[T/A]A[C/T]CT[A/C/G/T]	AT1G49205	1	-1000 bp to TSS	293	300	ATGAATCT
SLIM1 enriched binding motif (EBM)	M0680_1.02	[A/C/G/T]AATG[T/A]A[C/T]CT[A/C/G/T]	AT1G49210	1	-1000 bp to TSS	186	179	AGATTCAT
SLIM1 enriched binding motif (EBM)	M0680_1.02	[A/C/G/T]AATG[T/A]A[C/T]CT[A/C/G/T]	AT1G49230	1	-1000 bp to TSS	69	62	AGATTCAT
SLIM1 enriched binding motif (EBM)	M0680_1.02	[A/C/G/T]AATG[T/A]A[C/T]CT[A/C/G/T]	AT1G49320	1	-1000 bp to TSS	655	648	AGATTCAT
SLIM1 enriched binding motif (EBM)	M0680_1.02	[A/C/G/T]AATG[T/A]A[C/T]CT[A/C/G/T]	AT1G49530	1	-1000 bp to TSS	920	913	AGATTCAT
SLIM1 enriched binding motif (EBM)	M0680_1.02	[A/C/G/T]AATG[T/A]A[C/T]CT[A/C/G/T]	AT1G49620	1	-1000 bp to TSS	96	103	ATGAATCT
SLIM1 enriched binding motif (EBM)	M0680_1.02	[A/C/G/T]AATG[T/A]A[C/T]CT[A/C/G/T]	AT1G49715	1	-1000 bp to TSS	812	805	AGATTCAT
SLIM1 enriched binding motif (EBM)	M0680_1.02	[A/C/G/T]AATG[T/A]A[C/T]CT[A/C/G/T]	AT1G49810	1	-1000 bp to TSS	2	9	ATGAATCT
SLIM1 enriched binding motif (EBM)	M0680_1.02	[A/C/G/T]AATG[T/A]A[C/T]CT[A/C/G/T]	AT1G49870	1	-1000 bp to TSS	514	507	AGATTCAT
SLIM1 enriched binding motif (EBM)	M0680_1.02	[A/C/G/T]AATG[T/A]A[C/T]CT[A/C/G/T]	AT1G50400	1	-1000 bp to TSS	153	146	AGATTCAT
SLIM1 enriched binding motif (EBM)	M0680_1.02	[A/C/G/T]AATG[T/A]A[C/T]CT[A/C/G/T]	AT1G50410	1	-1000 bp to TSS	242	235	AGATTCAT
SLIM1 enriched binding motif (EBM)	M0680_1.02	[A/C/G/T]AATG[T/A]A[C/T]CT[A/C/G/T]	AT1G50530	1	-1000 bp to TSS	408	415	ATGAATCT
SLIM1 enriched binding motif (EBM)	M0680_1.02	[A/C/G/T]AATG[T/A]A[C/T]CT[A/C/G/T]	AT1G50620	1	-1000 bp to TSS	292	299	ATGAATCT
SLIM1 enriched binding motif (EBM)	M0680_1.02	[A/C/G/T]AATG[T/A]A[C/T]CT[A/C/G/T]	AT1G50659	1	-1000 bp to TSS	368	361	AGATTCAT
SLIM1 enriched binding motif (EBM)	M0680_1.02	[A/C/G/T]AATG[T/A]A[C/T]CT[A/C/G/T]	AT1G50730	1	-1000 bp to TSS	601	608	ATGAATCT
SLIM1 enriched binding motif (EBM)	M0680_1.02	[A/C/G/T]AATG[T/A]A[C/T]CT[A/C/G/T]	AT1G50830	1	-1000 bp to TSS	796	803	ATGAATCT
SLIM1 enriched binding motif (EBM)	M0680_1.02	[A/C/G/T]AATG[T/A]A[C/T]CT[A/C/G/T]	AT1G50840	1	-1000 bp to TSS	188	181	AGATTCAT
SLIM1 enriched binding motif (EBM)	M0680_1.02	[A/C/G/T]AATG[T/A]A[C/T]CT[A/C/G/T]	AT1G51110	1	-1000 bp to TSS	879	872	AGATTCAT
SLIM1 enriched binding motif (EBM)	M0680_1.02	[A/C/G/T]AATG[T/A]A[C/T]CT[A/C/G/T]	AT1G51120	1	-1000 bp to TSS	811	804	AGATTCAT
SLIM1 enriched binding motif (EBM)	M0680_1.02	[A/C/G/T]AATG[T/A]A[C/T]CT[A/C/G/T]	AT1G51200	1	-1000 bp to TSS	181	174	AGATTCAT
SLIM1 enriched binding motif (EBM)	M0680_1.02	[A/C/G/T]AATG[T/A]A[C/T]CT[A/C/G/T]	AT1G51350	1	-1000 bp to TSS	483	476	AGATTCAT
SLIM1 enriched binding motif (EBM)	M0680_1.02	[A/C/G/T]AATG[T/A]A[C/T]CT[A/C/G/T]	AT1G51450	1	-1000 bp to TSS	178	185	ATGAATCT
SLIM1 enriched binding motif (EBM)	M0680_1.02	[A/C/G/T]AATG[T/A]A[C/T]CT[A/C/G/T]	AT1G51645	1	-1000 bp to TSS	298	305	ATGAATCT
SLIM1 enriched binding motif (EBM)	M0680_1.02	[A/C/G/T]AATG[T/A]A[C/T]CT[A/C/G/T]	AT1G51805	1	-1000 bp to TSS	732	725	AGATTCAT
SLIM1 enriched binding motif (EBM)	M0680_1.02	[A/C/G/T]AATG[T/A]A[C/T]CT[A/C/G/T]	AT1G51860	1	-1000 bp to TSS	291	284	AGATTCAT
SLIM1 enriched binding motif (EBM)	M0680_1.02	[A/C/G/T]AATG[T/A]A[C/T]CT[A/C/G/T]	AT1G51920	1	-1000 bp to TSS	775	782	ATGAATCT
SLIM1 enriched binding motif (EBM)	M0680_1.02	[A/C/G/T]AATG[T/A]A[C/T]CT[A/C/G/T]	AT1G51960	1	-1000 bp to TSS	921	914	AGATTCAT
SLIM1 enriched binding motif (EBM)	M0680_1.02	[A/C/G/T]AATG[T/A]A[C/T]CT[A/C/G/T]	AT1G51965	1	-1000 bp to TSS	987	980	AGATTCAT
SLIM1 enriched binding motif (EBM)	M0680_1.02	[A/C/G/T]AATG[T/A]A[C/T]CT[A/C/G/T]	AT1G51970	1	-1000 bp to TSS	142	135	AGATTCAT
SLIM1 enriched binding motif (EBM)	M0680_1.02	[A/C/G/T]AATG[T/A]A[C/T]CT[A/C/G/T]	AT1G52050	1	-1000 bp to TSS	406	413	ATGAATCT
SLIM1 enriched binding motif (EBM)	M0680_1.02	[A/C/G/T]AATG[T/A]A[C/T]CT[A/C/G/T]	AT1G52130	1	-1000 bp to TSS	607	600	AGATTCAT
SLIM1 enriched binding motif (EBM)	M0680_1.02	[A/C/G/T]AATG[T/A]A[C/T]CT[A/C/G/T]	AT1G52150	1	-1000 bp to TSS	439	446	ATGAATCT
SLIM1 enriched binding motif (EBM)	M0680_1.02	[A/C/G/T]AATG[T/A]A[C/T]CT[A/C/G/T]	AT1G52170	1	-1000 bp to TSS	395	402	ATGAATCT
SLIM1 enriched binding motif (EBM)	M0680_1.02	[A/C/G/T]AATG[T/A]A[C/T]CT[A/C/G/T]	AT1G52200	1	-1000 bp to TSS	858	865	ATGAATCT
SLIM1 enriched binding motif (EBM)	M0680_1.02	[A/C/G/T]AATG[T/A]A[C/T]CT[A/C/G/T]	AT1G52230	1	-1000 bp to TSS	619	626	ATGAATCT
SLIM1 enriched binding motif (EBM)	M0680_1.02	[A/C/G/T]AATG[T/A]A[C/T]CT[A/C/G/T]	AT1G52325	1	-1000 bp to TSS	663	670	ATGAATCT
SLIM1 enriched binding motif (EBM)	M0680_1.02	[A/C/G/T]AATG[T/A]A[C/T]CT[A/C/G/T]	AT1G52440	1	-1000 bp to TSS	554	547	AGATTCAT
SLIM1 enriched binding motif (EBM)	M0680_1.02	[A/C/G/T]AATG[T/A]A[C/T]CT[A/C/G/T]	AT1G52565	1	-1000 bp to TSS	162	155	AGATTCAT
SLIM1 enriched binding motif (EBM)	M0680_1.02	[A/C/G/T]AATG[T/A]A[C/T]CT[A/C/G/T]	AT1G52760	1	-1000 bp to TSS	679	686	ATGAATCT
SLIM1 enriched binding motif (EBM)	M0680_1.02	[A/C/G/T]AATG[T/A]A[C/T]CT[A/C/G/T]	AT1G52940	1	-1000 bp to TSS	442	435	AGATTCAT
SLIM1 enriched binding motif (EBM)	M0680_1.02	[A/C/G/T]AATG[T/A]A[C/T]CT[A/C/G/T]	AT1G53060	1	-1000 bp to TSS	423	416	AGATTCAT
SLIM1 enriched binding motif (EBM)	M0680_1.02	[A/C/G/T]AATG[T/A]A[C/T]CT[A/C/G/T]	AT1G53240	1	-1000 bp to TSS	271	278	ATGAATCT
SLIM1 enriched binding motif (EBM)	M0680_1.02	[A/C/G/T]AATG[T/A]A[C/T]CT[A/C/G/T]	AT1G53530	1	-1000 bp to TSS	24	17	AGATTCAT
SLIM1 enriched binding motif (EBM)	M0680_1.02	[A/C/G/T]AATG[T/A]A[C/T]CT[A/C/G/T]	AT1G53540	1	-1000 bp to TSS	705	698	AGATTCAT
SLIM1 enriched binding motif (EBM)	M0680_1.02	[A/C/G/T]AATG[T/A]A[C/T]CT[A/C/G/T]	AT1G53542	1	-1000 bp to TSS	430	437	ATGAATCT
SLIM1 enriched binding motif (EBM)	M0680_1.02	[A/C/G/T]AATG[T/A]A[C/T]CT[A/C/G/T]	AT1G53720	1	-1000 bp to TSS	562	569	ATGAATCT
SLIM1 enriched binding motif (EBM)	M0680_1.02	[A/C/G/T]AATG[T/A]A[C/T]CT[A/C/G/T]	AT1G53880	1	-1000 bp to TSS	210	203	AGATTCAT
SLIM1 enriched binding motif (EBM)	M0680_1.02	[A/C/G/T]AATG[T/A]A[C/T]CT[A/C/G/T]	AT1G53885	1	-1000 bp to TSS	590	583	AGATTCAT
SLIM1 enriched binding motif (EBM)	M0680_1.02	[A/C/G/T]AATG[T/A]A[C/T]CT[A/C/G/T]	AT1G53903	1	-1000 bp to TSS	590	583	AGATTCAT
SLIM1 enriched binding motif (EBM)	M0680_1.02	[A/C/G/T]AATG[T/A]A[C/T]CT[A/C/G/T]	AT1G53910	1	-1000 bp to TSS	693	686	AGATTCAT
SLIM1 enriched binding motif (EBM)	M0680_1.02	[A/C/G/T]AATG[T/A]A[C/T]CT[A/C/G/T]	AT1G53920	1	-1000 bp to TSS	568	575	ATGAATCT
SLIM1 enriched binding motif (EBM)	M0680_1.02	[A/C/G/T]AATG[T/A]A[C/T]CT[A/C/G/T]	AT1G53940	1	-1000 bp to TSS	283	276	AGATTCAT
SLIM1 enriched binding motif (EBM)	M0680_1.02	[A/C/G/T]AATG[T/A]A[C/T]CT[A/C/G/T]	AT1G54080	1	-1000 bp to TSS	363	370	ATGAATCT
SLIM1 enriched binding motif (EBM)	M0680_1.02	[A/C/G/T]AATG[T/A]A[C/T]CT[A/C/G/T]	AT1G54130	1	-1000 bp to TSS	671	664	AGATTCAT
SLIM1 enriched binding motif (EBM)	M0680_1.02	[A/C/G/T]AATG[T/A]A[C/T]CT[A/C/G/T]	AT1G54290	1	-1000 bp to TSS	559	566	ATGAATCT
SLIM1 enriched binding motif (EBM)	M0680_1.02	[A/C/G/T]AATG[T/A]A[C/T]CT[A/C/G/T]	AT1G54300	1	-1000 bp to TSS	773	766	AGATTCAT
SLIM1 enriched binding motif (EBM)	M0680_1.02	[A/C/G/T]AATG[T/A]A[C/T]CT[A/C/G/T]	AT1G54320	1	-1000 bp to TSS	98	105	ATGAATCT
SLIM1 enriched binding motif (EBM)	M0680_1.02	[A/C/G/T]AATG[T/A]A[C/T]CT[A/C/G/T]	AT1G54830	1	-1000 bp to TSS	897	904	ATGAATCT
SLIM1 enriched binding motif (EBM)	M0680_1.02	[A/C/G/T]AATG[T/A]A[C/T]CT[A/C/G/T]	AT1G54970	1	-1000 bp to TSS	170	163	AGATTCAT
SLIM1 enriched binding motif (EBM)	M0680_1.02	[A/C/G/T]AATG[T/A]A[C/T]CT[A/C/G/T]	AT1G55140	1	-1000 bp to TSS	426	419	AGATTCAT
SLIM1 enriched binding motif (EBM)	M0680_1.02	[A/C/G/T]AATG[T/A]A[C/T]CT[A/C/G/T]	AT1G55207	1	-1000 bp to TSS	206	199	AGATTCAT
SLIM1 enriched binding motif (EBM)	M0680_1.02	[A/C/G/T]AATG[T/A]A[C/T]CT[A/C/G/T]	AT1G55490	1	-1000 bp to TSS	434	427	AGATTCAT
SLIM1 enriched binding motif (EBM)	M0680_1.02	[A/C/G/T]AATG[T/A]A[C/T]CT[A/C/G/T]	AT1G55540	1	-1000 bp to TSS	253	260	ATGAATCT
SLIM1 enriched binding motif (EBM)	M0680_1.02	[A/C/G/T]AATG[T/A]A[C/T]CT[A/C/G/T]	AT1G55660	1	-1000 bp to TSS	585	592	ATGAATCT
SLIM1 enriched binding motif (EBM)	M0680_1.02	[A/C/G/T]AATG[T/A]A[C/T]CT[A/C/G/T]	AT1G55690	1	-1000 bp to TSS	54	61	ATGAATCT
SLIM1 enriched binding motif (EBM)	M0680_1.02	[A/C/G/T]AATG[T/A]A[C/T]CT[A/C/G/T]	AT1G55755	1	-1000 bp to TSS	249	242	AGATTCAT
SLIM1 enriched binding motif (EBM)	M0680_1.02	[A/C/G/T]AATG[T/A]A[C/T]CT[A/C/G/T]	AT1G55950	1	-1000 bp to TSS	197	190	AGATTCAT
SLIM1 enriched binding motif (EBM)	M0680_1.02	[A/C/G/T]AATG[T/A]A[C/T]CT[A/C/G/T]	AT1G56360	1	-1000 bp to TSS	560	567	ATGAATCT
SLIM1 enriched binding motif (EBM)	M0680_1.02	[A/C/G/T]AATG[T/A]A[C/T]CT[A/C/G/T]	AT1G56380	1	-1000 bp to TSS	957	950	AGATTCAT
SLIM1 enriched binding motif (EBM)	M0680_1.02	[A/C/G/T]AATG[T/A]A[C/T]CT[A/C/G/T]	AT1G56450	1	-1000 bp to TSS	776	769	AGATTCAT
SLIM1 enriched binding motif (EBM)	M0680_1.02	[A/C/G/T]AATG[T/A]A[C/T]CT[A/C/G/T]	AT1G57565	1	-1000 bp to TSS	186	193	ATGAATCT
SLIM1 enriched binding motif (EBM)	M0680_1.02	[A/C/G/T]AATG[T/A]A[C/T]CT[A/C/G/T]	AT1G57580	1	-1000 bp to TSS	614	621	ATGAATCT
SLIM1 enriched binding motif (EBM)	M0680_1.02	[A/C/G/T]AATG[T/A]A[C/T]CT[A/C/G/T]	AT1G58100	1	-1000 bp to TSS	574	581	ATGAATCT
SLIM1 enriched binding motif (EBM)	M0680_1.02	[A/C/G/T]AATG[T/A]A[C/T]CT[A/C/G/T]	AT1G59453	1	-1000 bp to TSS	719	712	AGATTCAT
SLIM1 enriched binding motif (EBM)	M0680_1.02	[A/C/G/T]AATG[T/A]A[C/T]CT[A/C/G/T]	AT1G59630	1	-1000 bp to TSS	836	829	AGATTCAT
SLIM1 enriched binding motif (EBM)	M0680_1.02	[A/C/G/T]AATG[T/A]A[C/T]CT[A/C/G/T]	AT1G59670	1	-1000 bp to TSS	806	813	ATGAATCT
SLIM1 enriched binding motif (EBM)	M0680_1.02	[A/C/G/T]AATG[T/A]A[C/T]CT[A/C/G/T]	AT1G59750	1	-1000 bp to TSS	557	550	AGATTCAT
SLIM1 enriched binding motif (EBM)	M0680_1.02	[A/C/G/T]AATG[T/A]A[C/T]CT[A/C/G/T]	AT1G59880	1	-1000 bp to TSS	61	68	ATGAATCT
SLIM1 enriched binding motif (EBM)	M0680_1.02	[A/C/G/T]AATG[T/A]A[C/T]CT[A/C/G/T]	AT1G60025	1	-1000 bp to TSS	747	754	ATGAATCT
SLIM1 enriched binding motif (EBM)	M0680_1.02	[A/C/G/T]AATG[T/A]A[C/T]CT[A/C/G/T]	AT1G60060	1	-1000 bp to TSS	553	560	ATGAATCT
SLIM1 enriched binding motif (EBM)	M0680_1.02	[A/C/G/T]AATG[T/A]A[C/T]CT[A/C/G/T]	AT1G60095	1	-1000 bp to TSS	827	820	AGATTCAT
SLIM1 enriched binding motif (EBM)	M0680_1.02	[A/C/G/T]AATG[T/A]A[C/T]CT[A/C/G/T]	AT1G60230	1	-1000 bp to TSS	800	807	ATGAATCT
SLIM1 enriched binding motif (EBM)	M0680_1.02	[A/C/G/T]AATG[T/A]A[C/T]CT[A/C/G/T]	AT1G60290	1	-1000 bp to TSS	272	265	AGATTCAT
SLIM1 enriched binding motif (EBM)	M0680_1.02	[A/C/G/T]AATG[T/A]A[C/T]CT[A/C/G/T]	AT1G60390	1	-1000 bp to TSS	362	355	AGATTCAT
SLIM1 enriched binding motif (EBM)	M0680_1.02	[A/C/G/T]AATG[T/A]A[C/T]CT[A/C/G/T]	AT1G60450	1	-1000 bp to TSS	359	366	ATGAATCT
SLIM1 enriched binding motif (EBM)	M0680_1.02	[A/C/G/T]AATG[T/A]A[C/T]CT[A/C/G/T]	AT1G60460	1	-1000 bp to TSS	588	581	AGATTCAT
SLIM1 enriched binding motif (EBM)	M0680_1.02	[A/C/G/T]AATG[T/A]A[C/T]CT[A/C/G/T]	AT1G60600	1	-1000 bp to TSS	21	28	ATGAATCT
SLIM1 enriched binding motif (EBM)	M0680_1.02	[A/C/G/T]AATG[T/A]A[C/T]CT[A/C/G/T]	AT1G60630	1	-1000 bp to TSS	502	495	AGATTCAT
SLIM1 enriched binding motif (EBM)	M0680_1.02	[A/C/G/T]AATG[T/A]A[C/T]CT[A/C/G/T]	AT1G60720	1	-1000 bp to TSS	767	774	ATGAATCT
SLIM1 enriched binding motif (EBM)	M0680_1.02	[A/C/G/T]AATG[T/A]A[C/T]CT[A/C/G/T]	AT1G60810	1	-1000 bp to TSS	190	183	AGATTCAT
SLIM1 enriched binding motif (EBM)	M0680_1.02	[A/C/G/T]AATG[T/A]A[C/T]CT[A/C/G/T]	AT1G60815	1	-1000 bp to TSS	320	327	ATGAATCT
SLIM1 enriched binding motif (EBM)	M0680_1.02	[A/C/G/T]AATG[T/A]A[C/T]CT[A/C/G/T]	AT1G60900	1	-1000 bp to TSS	104	111	ATGAATCT
SLIM1 enriched binding motif (EBM)	M0680_1.02	[A/C/G/T]AATG[T/A]A[C/T]CT[A/C/G/T]	AT1G61130	1	-1000 bp to TSS	228	221	AGATTCAT
SLIM1 enriched binding motif (EBM)	M0680_1.02	[A/C/G/T]AATG[T/A]A[C/T]CT[A/C/G/T]	AT1G61230	1	-1000 bp to TSS	185	178	AGATTCAT
SLIM1 enriched binding motif (EBM)	M0680_1.02	[A/C/G/T]AATG[T/A]A[C/T]CT[A/C/G/T]	AT1G61380	1	-1000 bp to TSS	148	141	AGATTCAT
SLIM1 enriched binding motif (EBM)	M0680_1.02	[A/C/G/T]AATG[T/A]A[C/T]CT[A/C/G/T]	AT1G61410	1	-1000 bp to TSS	153	146	AGATTCAT
SLIM1 enriched binding motif (EBM)	M0680_1.02	[A/C/G/T]AATG[T/A]A[C/T]CT[A/C/G/T]	AT1G61440	1	-1000 bp to TSS	69	62	AGATTCAT
SLIM1 enriched binding motif (EBM)	M0680_1.02	[A/C/G/T]AATG[T/A]A[C/T]CT[A/C/G/T]	AT1G61520	1	-1000 bp to TSS	330	337	ATGAATCT
SLIM1 enriched binding motif (EBM)	M0680_1.02	[A/C/G/T]AATG[T/A]A[C/T]CT[A/C/G/T]	AT1G61550	1	-1000 bp to TSS	118	111	AGATTCAT
SLIM1 enriched binding motif (EBM)	M0680_1.02	[A/C/G/T]AATG[T/A]A[C/T]CT[A/C/G/T]	AT1G61562	1	-1000 bp to TSS	704	711	ATGAATCT
SLIM1 enriched binding motif (EBM)	M0680_1.02	[A/C/G/T]AATG[T/A]A[C/T]CT[A/C/G/T]	AT1G61780	1	-1000 bp to TSS	319	312	AGATTCAT
SLIM1 enriched binding motif (EBM)	M0680_1.02	[A/C/G/T]AATG[T/A]A[C/T]CT[A/C/G/T]	AT1G61970	1	-1000 bp to TSS	256	263	ATGAATCT
SLIM1 enriched binding motif (EBM)	M0680_1.02	[A/C/G/T]AATG[T/A]A[C/T]CT[A/C/G/T]	AT1G62085	1	-1000 bp to TSS	912	919	ATGAATCT
SLIM1 enriched binding motif (EBM)	M0680_1.02	[A/C/G/T]AATG[T/A]A[C/T]CT[A/C/G/T]	AT1G62090	1	-1000 bp to TSS	78	85	ATGAATCT
SLIM1 enriched binding motif (EBM)	M0680_1.02	[A/C/G/T]AATG[T/A]A[C/T]CT[A/C/G/T]	AT1G62110	1	-1000 bp to TSS	610	603	AGATTCAT
SLIM1 enriched binding motif (EBM)	M0680_1.02	[A/C/G/T]AATG[T/A]A[C/T]CT[A/C/G/T]	AT1G62440	1	-1000 bp to TSS	250	257	ATGAATCT
SLIM1 enriched binding motif (EBM)	M0680_1.02	[A/C/G/T]AATG[T/A]A[C/T]CT[A/C/G/T]	AT1G62510	1	-1000 bp to TSS	590	583	AGATTCAT
SLIM1 enriched binding motif (EBM)	M0680_1.02	[A/C/G/T]AATG[T/A]A[C/T]CT[A/C/G/T]	AT1G62570	1	-1000 bp to TSS	892	899	ATGAATCT
SLIM1 enriched binding motif (EBM)	M0680_1.02	[A/C/G/T]AATG[T/A]A[C/T]CT[A/C/G/T]	AT1G62650	1	-1000 bp to TSS	930	923	AGATTCAT
SLIM1 enriched binding motif (EBM)	M0680_1.02	[A/C/G/T]AATG[T/A]A[C/T]CT[A/C/G/T]	AT1G62750	1	-1000 bp to TSS	124	117	AGATTCAT
SLIM1 enriched binding motif (EBM)	M0680_1.02	[A/C/G/T]AATG[T/A]A[C/T]CT[A/C/G/T]	AT1G62886	1	-1000 bp to TSS	525	532	ATGAATCT
SLIM1 enriched binding motif (EBM)	M0680_1.02	[A/C/G/T]AATG[T/A]A[C/T]CT[A/C/G/T]	AT1G62978	1	-1000 bp to TSS	554	547	AGATTCAT
SLIM1 enriched binding motif (EBM)	M0680_1.02	[A/C/G/T]AATG[T/A]A[C/T]CT[A/C/G/T]	AT1G63050	1	-1000 bp to TSS	718	711	AGATTCAT
SLIM1 enriched binding motif (EBM)	M0680_1.02	[A/C/G/T]AATG[T/A]A[C/T]CT[A/C/G/T]	AT1G63210	1	-1000 bp to TSS	658	651	AGATTCAT
SLIM1 enriched binding motif (EBM)	M0680_1.02	[A/C/G/T]AATG[T/A]A[C/T]CT[A/C/G/T]	AT1G63310	1	-1000 bp to TSS	78	85	ATGAATCT
SLIM1 enriched binding motif (EBM)	M0680_1.02	[A/C/G/T]AATG[T/A]A[C/T]CT[A/C/G/T]	AT1G63410	1	-1000 bp to TSS	869	876	ATGAATCT
SLIM1 enriched binding motif (EBM)	M0680_1.02	[A/C/G/T]AATG[T/A]A[C/T]CT[A/C/G/T]	AT1G63530	1	-1000 bp to TSS	192	199	ATGAATCT
SLIM1 enriched binding motif (EBM)	M0680_1.02	[A/C/G/T]AATG[T/A]A[C/T]CT[A/C/G/T]	AT1G63580	1	-1000 bp to TSS	659	652	AGATTCAT
SLIM1 enriched binding motif (EBM)	M0680_1.02	[A/C/G/T]AATG[T/A]A[C/T]CT[A/C/G/T]	AT1G63615	1	-1000 bp to TSS	321	328	ATGAATCT
SLIM1 enriched binding motif (EBM)	M0680_1.02	[A/C/G/T]AATG[T/A]A[C/T]CT[A/C/G/T]	AT1G63860	1	-1000 bp to TSS	462	469	ATGAATCT
SLIM1 enriched binding motif (EBM)	M0680_1.02	[A/C/G/T]AATG[T/A]A[C/T]CT[A/C/G/T]	AT1G63870	1	-1000 bp to TSS	334	341	ATGAATCT
SLIM1 enriched binding motif (EBM)	M0680_1.02	[A/C/G/T]AATG[T/A]A[C/T]CT[A/C/G/T]	AT1G63930	1	-1000 bp to TSS	334	341	ATGAATCT
SLIM1 enriched binding motif (EBM)	M0680_1.02	[A/C/G/T]AATG[T/A]A[C/T]CT[A/C/G/T]	AT1G63950	1	-1000 bp to TSS	198	205	ATGAATCT
SLIM1 enriched binding motif (EBM)	M0680_1.02	[A/C/G/T]AATG[T/A]A[C/T]CT[A/C/G/T]	AT1G63980	1	-1000 bp to TSS	663	656	AGATTCAT
SLIM1 enriched binding motif (EBM)	M0680_1.02	[A/C/G/T]AATG[T/A]A[C/T]CT[A/C/G/T]	AT1G64010	1	-1000 bp to TSS	232	239	ATGAATCT
SLIM1 enriched binding motif (EBM)	M0680_1.02	[A/C/G/T]AATG[T/A]A[C/T]CT[A/C/G/T]	AT1G64020	1	-1000 bp to TSS	682	689	ATGAATCT
SLIM1 enriched binding motif (EBM)	M0680_1.02	[A/C/G/T]AATG[T/A]A[C/T]CT[A/C/G/T]	AT1G64040	1	-1000 bp to TSS	499	506	ATGAATCT
SLIM1 enriched binding motif (EBM)	M0680_1.02	[A/C/G/T]AATG[T/A]A[C/T]CT[A/C/G/T]	AT1G64200	1	-1000 bp to TSS	671	664	AGATTCAT
SLIM1 enriched binding motif (EBM)	M0680_1.02	[A/C/G/T]AATG[T/A]A[C/T]CT[A/C/G/T]	AT1G64210	1	-1000 bp to TSS	743	750	ATGAATCT
SLIM1 enriched binding motif (EBM)	M0680_1.02	[A/C/G/T]AATG[T/A]A[C/T]CT[A/C/G/T]	AT1G64360	1	-1000 bp to TSS	942	949	ATGAATCT
SLIM1 enriched binding motif (EBM)	M0680_1.02	[A/C/G/T]AATG[T/A]A[C/T]CT[A/C/G/T]	AT1G64385	1	-1000 bp to TSS	491	484	AGATTCAT
SLIM1 enriched binding motif (EBM)	M0680_1.02	[A/C/G/T]AATG[T/A]A[C/T]CT[A/C/G/T]	AT1G64390	1	-1000 bp to TSS	671	664	AGATTCAT
SLIM1 enriched binding motif (EBM)	M0680_1.02	[A/C/G/T]AATG[T/A]A[C/T]CT[A/C/G/T]	AT1G64520	1	-1000 bp to TSS	4	11	ATGAATCT
SLIM1 enriched binding motif (EBM)	M0680_1.02	[A/C/G/T]AATG[T/A]A[C/T]CT[A/C/G/T]	AT1G64585	1	-1000 bp to TSS	357	350	AGATTCAT
SLIM1 enriched binding motif (EBM)	M0680_1.02	[A/C/G/T]AATG[T/A]A[C/T]CT[A/C/G/T]	AT1G64640	1	-1000 bp to TSS	433	426	AGATTCAT
SLIM1 enriched binding motif (EBM)	M0680_1.02	[A/C/G/T]AATG[T/A]A[C/T]CT[A/C/G/T]	AT1G64660	1	-1000 bp to TSS	414	421	ATGAATCT
SLIM1 enriched binding motif (EBM)	M0680_1.02	[A/C/G/T]AATG[T/A]A[C/T]CT[A/C/G/T]	AT1G64790	1	-1000 bp to TSS	816	809	AGATTCAT
SLIM1 enriched binding motif (EBM)	M0680_1.02	[A/C/G/T]AATG[T/A]A[C/T]CT[A/C/G/T]	AT1G64795	1	-1000 bp to TSS	493	500	ATGAATCT
SLIM1 enriched binding motif (EBM)	M0680_1.02	[A/C/G/T]AATG[T/A]A[C/T]CT[A/C/G/T]	AT1G65020	1	-1000 bp to TSS	785	792	ATGAATCT
SLIM1 enriched binding motif (EBM)	M0680_1.02	[A/C/G/T]AATG[T/A]A[C/T]CT[A/C/G/T]	AT1G65110	1	-1000 bp to TSS	638	631	AGATTCAT
SLIM1 enriched binding motif (EBM)	M0680_1.02	[A/C/G/T]AATG[T/A]A[C/T]CT[A/C/G/T]	AT1G65113	1	-1000 bp to TSS	673	680	ATGAATCT
SLIM1 enriched binding motif (EBM)	M0680_1.02	[A/C/G/T]AATG[T/A]A[C/T]CT[A/C/G/T]	AT1G65130	1	-1000 bp to TSS	335	328	AGATTCAT
SLIM1 enriched binding motif (EBM)	M0680_1.02	[A/C/G/T]AATG[T/A]A[C/T]CT[A/C/G/T]	AT1G65150	1	-1000 bp to TSS	264	257	AGATTCAT
SLIM1 enriched binding motif (EBM)	M0680_1.02	[A/C/G/T]AATG[T/A]A[C/T]CT[A/C/G/T]	AT1G65165	1	-1000 bp to TSS	591	598	ATGAATCT
SLIM1 enriched binding motif (EBM)	M0680_1.02	[A/C/G/T]AATG[T/A]A[C/T]CT[A/C/G/T]	AT1G65220	1	-1000 bp to TSS	871	864	AGATTCAT
SLIM1 enriched binding motif (EBM)	M0680_1.02	[A/C/G/T]AATG[T/A]A[C/T]CT[A/C/G/T]	AT1G65490	1	-1000 bp to TSS	983	990	ATGAATCT
SLIM1 enriched binding motif (EBM)	M0680_1.02	[A/C/G/T]AATG[T/A]A[C/T]CT[A/C/G/T]	AT1G65540	1	-1000 bp to TSS	482	489	ATGAATCT
SLIM1 enriched binding motif (EBM)	M0680_1.02	[A/C/G/T]AATG[T/A]A[C/T]CT[A/C/G/T]	AT1G65585	1	-1000 bp to TSS	471	464	AGATTCAT
SLIM1 enriched binding motif (EBM)	M0680_1.02	[A/C/G/T]AATG[T/A]A[C/T]CT[A/C/G/T]	AT1G65620	1	-1000 bp to TSS	446	439	AGATTCAT
SLIM1 enriched binding motif (EBM)	M0680_1.02	[A/C/G/T]AATG[T/A]A[C/T]CT[A/C/G/T]	AT1G65640	1	-1000 bp to TSS	771	764	AGATTCAT
SLIM1 enriched binding motif (EBM)	M0680_1.02	[A/C/G/T]AATG[T/A]A[C/T]CT[A/C/G/T]	AT1G65680	1	-1000 bp to TSS	411	418	ATGAATCT
SLIM1 enriched binding motif (EBM)	M0680_1.02	[A/C/G/T]AATG[T/A]A[C/T]CT[A/C/G/T]	AT1G65700	1	-1000 bp to TSS	539	546	ATGAATCT
SLIM1 enriched binding motif (EBM)	M0680_1.02	[A/C/G/T]AATG[T/A]A[C/T]CT[A/C/G/T]	AT1G65845	1	-1000 bp to TSS	526	533	ATGAATCT
SLIM1 enriched binding motif (EBM)	M0680_1.02	[A/C/G/T]AATG[T/A]A[C/T]CT[A/C/G/T]	AT1G65850	1	-1000 bp to TSS	721	714	AGATTCAT
SLIM1 enriched binding motif (EBM)	M0680_1.02	[A/C/G/T]AATG[T/A]A[C/T]CT[A/C/G/T]	AT1G65950	1	-1000 bp to TSS	23	16	AGATTCAT
SLIM1 enriched binding motif (EBM)	M0680_1.02	[A/C/G/T]AATG[T/A]A[C/T]CT[A/C/G/T]	AT1G66330	1	-1000 bp to TSS	683	690	ATGAATCT
SLIM1 enriched binding motif (EBM)	M0680_1.02	[A/C/G/T]AATG[T/A]A[C/T]CT[A/C/G/T]	AT1G66852	1	-1000 bp to TSS	258	251	AGATTCAT
SLIM1 enriched binding motif (EBM)	M0680_1.02	[A/C/G/T]AATG[T/A]A[C/T]CT[A/C/G/T]	AT1G66870	1	-1000 bp to TSS	170	177	ATGAATCT
SLIM1 enriched binding motif (EBM)	M0680_1.02	[A/C/G/T]AATG[T/A]A[C/T]CT[A/C/G/T]	AT1G66980	1	-1000 bp to TSS	526	533	ATGAATCT
SLIM1 enriched binding motif (EBM)	M0680_1.02	[A/C/G/T]AATG[T/A]A[C/T]CT[A/C/G/T]	AT1G66990	1	-1000 bp to TSS	217	224	ATGAATCT
SLIM1 enriched binding motif (EBM)	M0680_1.02	[A/C/G/T]AATG[T/A]A[C/T]CT[A/C/G/T]	AT1G67130	1	-1000 bp to TSS	522	529	ATGAATCT
SLIM1 enriched binding motif (EBM)	M0680_1.02	[A/C/G/T]AATG[T/A]A[C/T]CT[A/C/G/T]	AT1G67350	1	-1000 bp to TSS	580	573	AGATTCAT
SLIM1 enriched binding motif (EBM)	M0680_1.02	[A/C/G/T]AATG[T/A]A[C/T]CT[A/C/G/T]	AT1G67790	1	-1000 bp to TSS	495	488	AGATTCAT
SLIM1 enriched binding motif (EBM)	M0680_1.02	[A/C/G/T]AATG[T/A]A[C/T]CT[A/C/G/T]	AT1G68020	1	-1000 bp to TSS	35	42	ATGAATCT
SLIM1 enriched binding motif (EBM)	M0680_1.02	[A/C/G/T]AATG[T/A]A[C/T]CT[A/C/G/T]	AT1G68180	1	-1000 bp to TSS	81	74	AGATTCAT
SLIM1 enriched binding motif (EBM)	M0680_1.02	[A/C/G/T]AATG[T/A]A[C/T]CT[A/C/G/T]	AT1G68200	1	-1000 bp to TSS	497	490	AGATTCAT
SLIM1 enriched binding motif (EBM)	M0680_1.02	[A/C/G/T]AATG[T/A]A[C/T]CT[A/C/G/T]	AT1G68570	1	-1000 bp to TSS	198	205	ATGAATCT
SLIM1 enriched binding motif (EBM)	M0680_1.02	[A/C/G/T]AATG[T/A]A[C/T]CT[A/C/G/T]	AT1G68640	1	-1000 bp to TSS	839	832	AGATTCAT
SLIM1 enriched binding motif (EBM)	M0680_1.02	[A/C/G/T]AATG[T/A]A[C/T]CT[A/C/G/T]	AT1G68670	1	-1000 bp to TSS	113	120	ATGAATCT
SLIM1 enriched binding motif (EBM)	M0680_1.02	[A/C/G/T]AATG[T/A]A[C/T]CT[A/C/G/T]	AT1G68870	1	-1000 bp to TSS	384	377	AGATTCAT
SLIM1 enriched binding motif (EBM)	M0680_1.02	[A/C/G/T]AATG[T/A]A[C/T]CT[A/C/G/T]	AT1G68872	1	-1000 bp to TSS	325	318	AGATTCAT
SLIM1 enriched binding motif (EBM)	M0680_1.02	[A/C/G/T]AATG[T/A]A[C/T]CT[A/C/G/T]	AT1G68877	1	-1000 bp to TSS	88	95	ATGAATCT
SLIM1 enriched binding motif (EBM)	M0680_1.02	[A/C/G/T]AATG[T/A]A[C/T]CT[A/C/G/T]	AT1G68935	1	-1000 bp to TSS	61	68	ATGAATCT
SLIM1 enriched binding motif (EBM)	M0680_1.02	[A/C/G/T]AATG[T/A]A[C/T]CT[A/C/G/T]	AT1G68970	1	-1000 bp to TSS	802	809	ATGAATCT
SLIM1 enriched binding motif (EBM)	M0680_1.02	[A/C/G/T]AATG[T/A]A[C/T]CT[A/C/G/T]	AT1G68980	1	-1000 bp to TSS	394	387	AGATTCAT
SLIM1 enriched binding motif (EBM)	M0680_1.02	[A/C/G/T]AATG[T/A]A[C/T]CT[A/C/G/T]	AT1G69040	1	-1000 bp to TSS	555	562	ATGAATCT
SLIM1 enriched binding motif (EBM)	M0680_1.02	[A/C/G/T]AATG[T/A]A[C/T]CT[A/C/G/T]	AT1G69190	1	-1000 bp to TSS	959	952	AGATTCAT
SLIM1 enriched binding motif (EBM)	M0680_1.02	[A/C/G/T]AATG[T/A]A[C/T]CT[A/C/G/T]	AT1G69200	1	-1000 bp to TSS	37	44	ATGAATCT
SLIM1 enriched binding motif (EBM)	M0680_1.02	[A/C/G/T]AATG[T/A]A[C/T]CT[A/C/G/T]	AT1G69310	1	-1000 bp to TSS	312	319	ATGAATCT
SLIM1 enriched binding motif (EBM)	M0680_1.02	[A/C/G/T]AATG[T/A]A[C/T]CT[A/C/G/T]	AT1G69420	1	-1000 bp to TSS	208	201	AGATTCAT
SLIM1 enriched binding motif (EBM)	M0680_1.02	[A/C/G/T]AATG[T/A]A[C/T]CT[A/C/G/T]	AT1G69520	1	-1000 bp to TSS	244	251	ATGAATCT
SLIM1 enriched binding motif (EBM)	M0680_1.02	[A/C/G/T]AATG[T/A]A[C/T]CT[A/C/G/T]	AT1G69526	1	-1000 bp to TSS	896	889	AGATTCAT
SLIM1 enriched binding motif (EBM)	M0680_1.02	[A/C/G/T]AATG[T/A]A[C/T]CT[A/C/G/T]	AT1G69540	1	-1000 bp to TSS	62	55	AGATTCAT
SLIM1 enriched binding motif (EBM)	M0680_1.02	[A/C/G/T]AATG[T/A]A[C/T]CT[A/C/G/T]	AT1G69620	1	-1000 bp to TSS	542	535	AGATTCAT
SLIM1 enriched binding motif (EBM)	M0680_1.02	[A/C/G/T]AATG[T/A]A[C/T]CT[A/C/G/T]	AT1G69660	1	-1000 bp to TSS	945	938	AGATTCAT
SLIM1 enriched binding motif (EBM)	M0680_1.02	[A/C/G/T]AATG[T/A]A[C/T]CT[A/C/G/T]	AT1G69700	1	-1000 bp to TSS	29	36	ATGAATCT
SLIM1 enriched binding motif (EBM)	M0680_1.02	[A/C/G/T]AATG[T/A]A[C/T]CT[A/C/G/T]	AT1G69730	1	-1000 bp to TSS	178	185	ATGAATCT
SLIM1 enriched binding motif (EBM)	M0680_1.02	[A/C/G/T]AATG[T/A]A[C/T]CT[A/C/G/T]	AT1G69780	1	-1000 bp to TSS	807	814	ATGAATCT
SLIM1 enriched binding motif (EBM)	M0680_1.02	[A/C/G/T]AATG[T/A]A[C/T]CT[A/C/G/T]	AT1G69800	1	-1000 bp to TSS	58	51	AGATTCAT
SLIM1 enriched binding motif (EBM)	M0680_1.02	[A/C/G/T]AATG[T/A]A[C/T]CT[A/C/G/T]	AT1G70190	1	-1000 bp to TSS	794	801	ATGAATCT
SLIM1 enriched binding motif (EBM)	M0680_1.02	[A/C/G/T]AATG[T/A]A[C/T]CT[A/C/G/T]	AT1G70270	1	-1000 bp to TSS	837	830	AGATTCAT
SLIM1 enriched binding motif (EBM)	M0680_1.02	[A/C/G/T]AATG[T/A]A[C/T]CT[A/C/G/T]	AT1G70350	1	-1000 bp to TSS	636	629	AGATTCAT
SLIM1 enriched binding motif (EBM)	M0680_1.02	[A/C/G/T]AATG[T/A]A[C/T]CT[A/C/G/T]	AT1G70840	1	-1000 bp to TSS	336	343	ATGAATCT
SLIM1 enriched binding motif (EBM)	M0680_1.02	[A/C/G/T]AATG[T/A]A[C/T]CT[A/C/G/T]	AT1G70950	1	-1000 bp to TSS	557	550	AGATTCAT
SLIM1 enriched binding motif (EBM)	M0680_1.02	[A/C/G/T]AATG[T/A]A[C/T]CT[A/C/G/T]	AT1G71200	1	-1000 bp to TSS	686	693	ATGAATCT
SLIM1 enriched binding motif (EBM)	M0680_1.02	[A/C/G/T]AATG[T/A]A[C/T]CT[A/C/G/T]	AT1G71790	1	-1000 bp to TSS	682	689	ATGAATCT
SLIM1 enriched binding motif (EBM)	M0680_1.02	[A/C/G/T]AATG[T/A]A[C/T]CT[A/C/G/T]	AT1G71950	1	-1000 bp to TSS	526	519	AGATTCAT
SLIM1 enriched binding motif (EBM)	M0680_1.02	[A/C/G/T]AATG[T/A]A[C/T]CT[A/C/G/T]	AT1G72070	1	-1000 bp to TSS	595	602	ATGAATCT
SLIM1 enriched binding motif (EBM)	M0680_1.02	[A/C/G/T]AATG[T/A]A[C/T]CT[A/C/G/T]	AT1G72140	1	-1000 bp to TSS	740	747	ATGAATCT
SLIM1 enriched binding motif (EBM)	M0680_1.02	[A/C/G/T]AATG[T/A]A[C/T]CT[A/C/G/T]	AT1G72180	1	-1000 bp to TSS	633	640	ATGAATCT
SLIM1 enriched binding motif (EBM)	M0680_1.02	[A/C/G/T]AATG[T/A]A[C/T]CT[A/C/G/T]	AT1G72230	1	-1000 bp to TSS	131	138	ATGAATCT
SLIM1 enriched binding motif (EBM)	M0680_1.02	[A/C/G/T]AATG[T/A]A[C/T]CT[A/C/G/T]	AT1G72250	1	-1000 bp to TSS	674	681	ATGAATCT
SLIM1 enriched binding motif (EBM)	M0680_1.02	[A/C/G/T]AATG[T/A]A[C/T]CT[A/C/G/T]	AT1G72500	1	-1000 bp to TSS	539	532	AGATTCAT
SLIM1 enriched binding motif (EBM)	M0680_1.02	[A/C/G/T]AATG[T/A]A[C/T]CT[A/C/G/T]	AT1G72550	1	-1000 bp to TSS	349	342	AGATTCAT
SLIM1 enriched binding motif (EBM)	M0680_1.02	[A/C/G/T]AATG[T/A]A[C/T]CT[A/C/G/T]	AT1G72690	1	-1000 bp to TSS	629	636	ATGAATCT
SLIM1 enriched binding motif (EBM)	M0680_1.02	[A/C/G/T]AATG[T/A]A[C/T]CT[A/C/G/T]	AT1G72900	1	-1000 bp to TSS	546	539	AGATTCAT
SLIM1 enriched binding motif (EBM)	M0680_1.02	[A/C/G/T]AATG[T/A]A[C/T]CT[A/C/G/T]	AT1G72970	1	-1000 bp to TSS	238	245	ATGAATCT
SLIM1 enriched binding motif (EBM)	M0680_1.02	[A/C/G/T]AATG[T/A]A[C/T]CT[A/C/G/T]	AT1G72990	1	-1000 bp to TSS	396	389	AGATTCAT
SLIM1 enriched binding motif (EBM)	M0680_1.02	[A/C/G/T]AATG[T/A]A[C/T]CT[A/C/G/T]	AT1G73140	1	-1000 bp to TSS	486	493	ATGAATCT
SLIM1 enriched binding motif (EBM)	M0680_1.02	[A/C/G/T]AATG[T/A]A[C/T]CT[A/C/G/T]	AT1G73165	1	-1000 bp to TSS	493	486	AGATTCAT
SLIM1 enriched binding motif (EBM)	M0680_1.02	[A/C/G/T]AATG[T/A]A[C/T]CT[A/C/G/T]	AT1G73310	1	-1000 bp to TSS	422	429	ATGAATCT
SLIM1 enriched binding motif (EBM)	M0680_1.02	[A/C/G/T]AATG[T/A]A[C/T]CT[A/C/G/T]	AT1G73350	1	-1000 bp to TSS	132	125	AGATTCAT
SLIM1 enriched binding motif (EBM)	M0680_1.02	[A/C/G/T]AATG[T/A]A[C/T]CT[A/C/G/T]	AT1G73607	1	-1000 bp to TSS	741	734	AGATTCAT
SLIM1 enriched binding motif (EBM)	M0680_1.02	[A/C/G/T]AATG[T/A]A[C/T]CT[A/C/G/T]	AT1G73640	1	-1000 bp to TSS	526	519	AGATTCAT
SLIM1 enriched binding motif (EBM)	M0680_1.02	[A/C/G/T]AATG[T/A]A[C/T]CT[A/C/G/T]	AT1G73655	1	-1000 bp to TSS	726	719	AGATTCAT
SLIM1 enriched binding motif (EBM)	M0680_1.02	[A/C/G/T]AATG[T/A]A[C/T]CT[A/C/G/T]	AT1G73980	1	-1000 bp to TSS	983	990	ATGAATCT
SLIM1 enriched binding motif (EBM)	M0680_1.02	[A/C/G/T]AATG[T/A]A[C/T]CT[A/C/G/T]	AT1G73990	1	-1000 bp to TSS	791	784	AGATTCAT
SLIM1 enriched binding motif (EBM)	M0680_1.02	[A/C/G/T]AATG[T/A]A[C/T]CT[A/C/G/T]	AT1G74140	1	-1000 bp to TSS	45	38	AGATTCAT
SLIM1 enriched binding motif (EBM)	M0680_1.02	[A/C/G/T]AATG[T/A]A[C/T]CT[A/C/G/T]	AT1G74160	1	-1000 bp to TSS	751	744	AGATTCAT
SLIM1 enriched binding motif (EBM)	M0680_1.02	[A/C/G/T]AATG[T/A]A[C/T]CT[A/C/G/T]	AT1G74230	1	-1000 bp to TSS	205	198	AGATTCAT
SLIM1 enriched binding motif (EBM)	M0680_1.02	[A/C/G/T]AATG[T/A]A[C/T]CT[A/C/G/T]	AT1G74270	1	-1000 bp to TSS	765	772	ATGAATCT
SLIM1 enriched binding motif (EBM)	M0680_1.02	[A/C/G/T]AATG[T/A]A[C/T]CT[A/C/G/T]	AT1G74320	1	-1000 bp to TSS	611	604	AGATTCAT
SLIM1 enriched binding motif (EBM)	M0680_1.02	[A/C/G/T]AATG[T/A]A[C/T]CT[A/C/G/T]	AT1G74400	1	-1000 bp to TSS	131	124	AGATTCAT
SLIM1 enriched binding motif (EBM)	M0680_1.02	[A/C/G/T]AATG[T/A]A[C/T]CT[A/C/G/T]	AT1G74480	1	-1000 bp to TSS	869	862	AGATTCAT
SLIM1 enriched binding motif (EBM)	M0680_1.02	[A/C/G/T]AATG[T/A]A[C/T]CT[A/C/G/T]	AT1G74490	1	-1000 bp to TSS	747	740	AGATTCAT
SLIM1 enriched binding motif (EBM)	M0680_1.02	[A/C/G/T]AATG[T/A]A[C/T]CT[A/C/G/T]	AT1G74680	1	-1000 bp to TSS	684	691	ATGAATCT
SLIM1 enriched binding motif (EBM)	M0680_1.02	[A/C/G/T]AATG[T/A]A[C/T]CT[A/C/G/T]	AT1G74730	1	-1000 bp to TSS	659	652	AGATTCAT
SLIM1 enriched binding motif (EBM)	M0680_1.02	[A/C/G/T]AATG[T/A]A[C/T]CT[A/C/G/T]	AT1G74820	1	-1000 bp to TSS	443	450	ATGAATCT
SLIM1 enriched binding motif (EBM)	M0680_1.02	[A/C/G/T]AATG[T/A]A[C/T]CT[A/C/G/T]	AT1G74929	1	-1000 bp to TSS	301	294	AGATTCAT
SLIM1 enriched binding motif (EBM)	M0680_1.02	[A/C/G/T]AATG[T/A]A[C/T]CT[A/C/G/T]	AT1G74950	1	-1000 bp to TSS	662	655	AGATTCAT
SLIM1 enriched binding motif (EBM)	M0680_1.02	[A/C/G/T]AATG[T/A]A[C/T]CT[A/C/G/T]	AT1G74970	1	-1000 bp to TSS	498	505	ATGAATCT
SLIM1 enriched binding motif (EBM)	M0680_1.02	[A/C/G/T]AATG[T/A]A[C/T]CT[A/C/G/T]	AT1G75335	1	-1000 bp to TSS	452	459	ATGAATCT
SLIM1 enriched binding motif (EBM)	M0680_1.02	[A/C/G/T]AATG[T/A]A[C/T]CT[A/C/G/T]	AT1G75430	1	-1000 bp to TSS	955	962	ATGAATCT
SLIM1 enriched binding motif (EBM)	M0680_1.02	[A/C/G/T]AATG[T/A]A[C/T]CT[A/C/G/T]	AT1G75510	1	-1000 bp to TSS	178	171	AGATTCAT
SLIM1 enriched binding motif (EBM)	M0680_1.02	[A/C/G/T]AATG[T/A]A[C/T]CT[A/C/G/T]	AT1G75590	1	-1000 bp to TSS	629	622	AGATTCAT
SLIM1 enriched binding motif (EBM)	M0680_1.02	[A/C/G/T]AATG[T/A]A[C/T]CT[A/C/G/T]	AT1G75630	1	-1000 bp to TSS	696	703	ATGAATCT
SLIM1 enriched binding motif (EBM)	M0680_1.02	[A/C/G/T]AATG[T/A]A[C/T]CT[A/C/G/T]	AT1G75690	1	-1000 bp to TSS	470	463	AGATTCAT
SLIM1 enriched binding motif (EBM)	M0680_1.02	[A/C/G/T]AATG[T/A]A[C/T]CT[A/C/G/T]	AT1G75780	1	-1000 bp to TSS	799	792	AGATTCAT
SLIM1 enriched binding motif (EBM)	M0680_1.02	[A/C/G/T]AATG[T/A]A[C/T]CT[A/C/G/T]	AT1G75785	1	-1000 bp to TSS	796	789	AGATTCAT
SLIM1 enriched binding motif (EBM)	M0680_1.02	[A/C/G/T]AATG[T/A]A[C/T]CT[A/C/G/T]	AT1G75850	1	-1000 bp to TSS	624	617	AGATTCAT
SLIM1 enriched binding motif (EBM)	M0680_1.02	[A/C/G/T]AATG[T/A]A[C/T]CT[A/C/G/T]	AT1G75890	1	-1000 bp to TSS	149	156	ATGAATCT
SLIM1 enriched binding motif (EBM)	M0680_1.02	[A/C/G/T]AATG[T/A]A[C/T]CT[A/C/G/T]	AT1G76010	1	-1000 bp to TSS	729	736	ATGAATCT
SLIM1 enriched binding motif (EBM)	M0680_1.02	[A/C/G/T]AATG[T/A]A[C/T]CT[A/C/G/T]	AT1G76020	1	-1000 bp to TSS	325	318	AGATTCAT
SLIM1 enriched binding motif (EBM)	M0680_1.02	[A/C/G/T]AATG[T/A]A[C/T]CT[A/C/G/T]	AT1G76120	1	-1000 bp to TSS	579	572	AGATTCAT
SLIM1 enriched binding motif (EBM)	M0680_1.02	[A/C/G/T]AATG[T/A]A[C/T]CT[A/C/G/T]	AT1G76210	1	-1000 bp to TSS	86	93	ATGAATCT
SLIM1 enriched binding motif (EBM)	M0680_1.02	[A/C/G/T]AATG[T/A]A[C/T]CT[A/C/G/T]	AT1G76250	1	-1000 bp to TSS	156	149	AGATTCAT
SLIM1 enriched binding motif (EBM)	M0680_1.02	[A/C/G/T]AATG[T/A]A[C/T]CT[A/C/G/T]	AT1G76260	1	-1000 bp to TSS	878	885	ATGAATCT
SLIM1 enriched binding motif (EBM)	M0680_1.02	[A/C/G/T]AATG[T/A]A[C/T]CT[A/C/G/T]	AT1G76400	1	-1000 bp to TSS	667	674	ATGAATCT
SLIM1 enriched binding motif (EBM)	M0680_1.02	[A/C/G/T]AATG[T/A]A[C/T]CT[A/C/G/T]	AT1G76530	1	-1000 bp to TSS	1	8	ATGAATCT
SLIM1 enriched binding motif (EBM)	M0680_1.02	[A/C/G/T]AATG[T/A]A[C/T]CT[A/C/G/T]	AT1G76690	1	-1000 bp to TSS	80	73	AGATTCAT
SLIM1 enriched binding motif (EBM)	M0680_1.02	[A/C/G/T]AATG[T/A]A[C/T]CT[A/C/G/T]	AT1G76830	1	-1000 bp to TSS	493	500	ATGAATCT
SLIM1 enriched binding motif (EBM)	M0680_1.02	[A/C/G/T]AATG[T/A]A[C/T]CT[A/C/G/T]	AT1G76920	1	-1000 bp to TSS	977	984	ATGAATCT
SLIM1 enriched binding motif (EBM)	M0680_1.02	[A/C/G/T]AATG[T/A]A[C/T]CT[A/C/G/T]	AT1G77093	1	-1000 bp to TSS	24	31	ATGAATCT
SLIM1 enriched binding motif (EBM)	M0680_1.02	[A/C/G/T]AATG[T/A]A[C/T]CT[A/C/G/T]	AT1G77131	1	-1000 bp to TSS	196	203	ATGAATCT
SLIM1 enriched binding motif (EBM)	M0680_1.02	[A/C/G/T]AATG[T/A]A[C/T]CT[A/C/G/T]	AT1G77150	1	-1000 bp to TSS	437	430	AGATTCAT
SLIM1 enriched binding motif (EBM)	M0680_1.02	[A/C/G/T]AATG[T/A]A[C/T]CT[A/C/G/T]	AT1G77250	1	-1000 bp to TSS	697	690	AGATTCAT
SLIM1 enriched binding motif (EBM)	M0680_1.02	[A/C/G/T]AATG[T/A]A[C/T]CT[A/C/G/T]	AT1G77390	1	-1000 bp to TSS	238	231	AGATTCAT
SLIM1 enriched binding motif (EBM)	M0680_1.02	[A/C/G/T]AATG[T/A]A[C/T]CT[A/C/G/T]	AT1G77400	1	-1000 bp to TSS	474	481	ATGAATCT
[truncated: 8,135 more rows]

## Sheet: motif enrichment in class1 prom
motif ID	motif name	motif class	promoter search window	N of gene promoters with motif	N of gene promoters queried	p-value	Bonferroni adj p-value	Benjamini adj p-value	FDR	Genes
MA1232.1	AT4G28140	AP2/ERF domain	-1000 bp to TSS	267	1727	5.08198e-17	2.39361e-14	1.61165e-13	2.39361e-14	AT1G07530,AT1G10140,AT1G11210,AT1G23040,AT1G25370,AT1G25500,AT1G31130,AT1G35420,AT1G48480,AT1G53910,AT1G69640,AT1G78260,AT2G04780,AT2G27720,AT2G36050,AT2G41410,AT2G47450,AT3G04930,AT3G10490,AT3G11640,AT3G11820,AT3G13229,AT3G13700,AT3G16510,AT3G26510,AT3G52960,AT3G55470,AT3G55950,AT3G59940,AT3G63310,AT3G63410,AT4G11100,AT4G14870,AT4G15270,AT4G15490,AT4G18670,AT4G24570,AT4G28050,AT5G04890,AT5G13820…
MA1248.1	DREB26	AP2/ERF domain	-1000 bp to TSS	251	1727	1.17072e-12	5.51411e-10	1.85636e-09	2.75705e-10	AT1G06190,AT1G07530,AT1G10140,AT1G11210,AT1G23040,AT1G25370,AT1G25500,AT1G31130,AT1G33290,AT1G35420,AT1G48480,AT1G53910,AT1G69640,AT2G04780,AT2G17290,AT2G27720,AT2G40150,AT2G41410,AT2G47450,AT3G11640,AT3G11820,AT3G13229,AT3G13700,AT3G52960,AT3G55470,AT3G55950,AT3G59940,AT3G63310,AT3G63410,AT4G11100,AT4G13510,AT4G15270,AT4G15490,AT4G17810,AT4G18670,AT4G24570,AT4G28050,AT4G35310,AT5G04890,AT5G13820…
MA1034.1	Os05g0497200	AP2/ERF domain	-1000 bp to TSS	256	1727	5.28079e-11	2.48725e-08	4.56011e-08	6.77264e-09	AT1G10140,AT1G11210,AT1G23040,AT1G25370,AT1G35420,AT1G61170,AT1G71040,AT2G01450,AT2G28150,AT2G36000,AT2G36050,AT2G39710,AT2G44578,AT2G47450,AT3G02840,AT3G04930,AT3G05200,AT3G10490,AT3G11640,AT3G13700,AT3G16510,AT3G24929,AT3G47820,AT3G55470,AT3G59940,AT3G63410,AT4G11220,AT4G12070,AT4G13510,AT4G14870,AT4G24570,AT4G25390,AT4G28050,AT4G32020,AT5G04890,AT5G18970,AT5G21940,AT5G24090,AT5G24990,AT5G27420…
MA1263.1	AT1G36060	AP2/ERF domain	-1000 bp to TSS	288	1727	5.75171e-11	2.70906e-08	4.56011e-08	6.77264e-09	AT1G10140,AT1G11210,AT1G21910,AT1G23040,AT1G25370,AT1G25500,AT1G30520,AT1G33290,AT1G35420,AT1G48480,AT2G04780,AT2G17290,AT2G21500,AT2G37660,AT2G40150,AT2G41410,AT2G47450,AT3G04930,AT3G10490,AT3G11640,AT3G11820,AT3G13229,AT3G16510,AT3G47800,AT3G52960,AT3G55470,AT3G55950,AT3G57750,AT3G59940,AT3G63310,AT3G63410,AT4G11100,AT4G11850,AT4G12070,AT4G13510,AT4G14870,AT4G15270,AT4G15490,AT4G18670,AT4G22490…
MA1258.1	DREB2	AP2/ERF domain	-1000 bp to TSS	259	1727	2.38381e-10	1.12277e-07	1.51196e-07	2.24555e-08	AT1G10140,AT1G11210,AT1G23040,AT1G25370,AT1G33290,AT1G35420,AT1G48480,AT1G69640,AT1G73130,AT1G74790,AT1G78420,AT2G02170,AT2G02710,AT2G04780,AT2G27720,AT2G36000,AT2G41410,AT2G43030,AT3G09830,AT3G11640,AT3G13229,AT3G16510,AT3G52960,AT3G55470,AT3G55950,AT3G59940,AT3G63310,AT3G63410,AT4G11100,AT4G12070,AT4G13510,AT4G17810,AT4G18580,AT4G18670,AT4G24570,AT4G25390,AT4G27430,AT5G04890,AT5G13820,AT5G24990…
MA1244.1	ABR1	AP2/ERF domain	-1000 bp to TSS	199	1727	1.40661e-09	6.62515e-07	7.43467e-07	1.10419e-07	AT1G10140,AT1G11210,AT1G25370,AT1G48480,AT1G53910,AT2G17787,AT2G36050,AT2G41410,AT2G44578,AT2G47450,AT3G02840,AT3G04930,AT3G10490,AT3G11640,AT3G13700,AT3G16510,AT3G26710,AT3G47820,AT3G52960,AT3G55950,AT3G59940,AT3G63310,AT3G63410,AT4G14870,AT4G17810,AT4G18670,AT4G22360,AT4G24570,AT4G28050,AT5G04890,AT5G18970,AT5G21940,AT5G23850,AT5G24990,AT5G38300,AT5G45110,AT5G47220,AT5G62150,AT5G62280,AT1G04250…
MA1233.1	AT1G71450	AP2/ERF domain	-1000 bp to TSS	154	1727	7.71599e-09	3.63423e-06	3.05135e-06	4.53184e-07	AT1G07530,AT1G10140,AT1G11210,AT1G23040,AT1G25370,AT1G35420,AT1G48480,AT1G53910,AT1G78260,AT2G27720,AT2G36050,AT2G41170,AT2G41410,AT2G44578,AT2G47450,AT3G11640,AT3G13700,AT3G16510,AT3G26510,AT3G52960,AT3G55950,AT3G59940,AT3G63310,AT4G14870,AT4G18670,AT4G24570,AT5G04890,AT5G13820,AT5G21940,AT5G22640,AT5G23850,AT5G24990,AT5G38300,AT5G47220,AT5G65220,AT1G04250,AT1G08280,AT1G15830,AT1G27730,AT1G32350…
MA1227.1	AT1G12630	AP2/ERF domain	-1000 bp to TSS	226	1727	8.46659e-09	3.98776e-06	3.05135e-06	4.53184e-07	AT1G10140,AT1G11210,AT1G18570,AT1G23040,AT1G25370,AT1G31130,AT1G35420,AT1G48480,AT1G53910,AT1G67920,AT2G04780,AT2G17290,AT2G36050,AT2G41410,AT2G42870,AT2G44578,AT2G47450,AT3G03820,AT3G08760,AT3G10490,AT3G11640,AT3G13700,AT3G16510,AT3G26510,AT3G47800,AT3G51230,AT3G55470,AT3G55950,AT3G59940,AT3G63310,AT3G63410,AT4G12070,AT4G14870,AT4G15490,AT4G18670,AT4G24570,AT4G35310,AT5G21940,AT5G23850,AT5G24990…
MA0976.1	CRF4	AP2/ERF domain	-1000 bp to TSS	260	1727	9.80091e-09	4.61623e-06	3.05135e-06	4.53184e-07	AT1G10140,AT1G11210,AT1G23040,AT1G25370,AT1G35420,AT1G53910,AT1G71040,AT2G17787,AT2G28150,AT2G36000,AT2G36050,AT2G41410,AT2G44578,AT2G47450,AT3G02840,AT3G04930,AT3G05200,AT3G10490,AT3G11640,AT3G13700,AT3G16510,AT3G47820,AT3G55470,AT3G59940,AT3G63310,AT3G63410,AT4G11100,AT4G11220,AT4G13510,AT4G14870,AT4G18670,AT4G24570,AT4G25390,AT4G28050,AT4G28660,AT4G32020,AT5G04890,AT5G10780,AT5G18970,AT5G23850…
MA1049.1	ERF094	AP2/ERF domain	-1000 bp to TSS	273	1727	1.0021e-08	4.71987e-06	3.05135e-06	4.53184e-07	AT1G06190,AT1G10140,AT1G11210,AT1G23040,AT1G25370,AT1G61170,AT1G64150,AT1G71040,AT1G74790,AT2G01450,AT2G28150,AT2G36000,AT2G36050,AT2G47450,AT3G02840,AT3G03820,AT3G05200,AT3G08860,AT3G10490,AT3G11640,AT3G13700,AT3G16510,AT3G47820,AT3G59940,AT3G63310,AT3G63410,AT4G11220,AT4G13510,AT4G14870,AT4G17810,AT4G17900,AT4G18670,AT4G24570,AT4G25390,AT4G28390,AT4G32020,AT5G04890,AT5G10780,AT5G18970,AT5G24090…
MA1239.1	ERF104	AP2/ERF domain	-1000 bp to TSS	163	1727	1.05839e-08	4.98503e-06	3.05135e-06	4.53184e-07	AT1G01355,AT1G07530,AT1G10140,AT1G11210,AT1G23040,AT1G25370,AT1G35420,AT1G48480,AT1G53910,AT2G27720,AT2G36050,AT2G41170,AT2G41410,AT2G44578,AT2G47450,AT3G02840,AT3G10490,AT3G11640,AT3G13700,AT3G16510,AT3G26510,AT3G52960,AT3G55950,AT3G63310,AT3G63410,AT4G14870,AT4G18670,AT4G24570,AT4G32020,AT5G04890,AT5G21940,AT5G23850,AT5G24990,AT5G38300,AT5G47220,AT5G62280,AT5G65220,AT1G04250,AT1G15830,AT1G27090…
MA1256.1	RAP212	AP2/ERF domain	-1000 bp to TSS	224	1727	1.83948e-08	8.66394e-06	4.8596e-06	7.21744e-07	AT1G10140,AT1G11210,AT1G23040,AT1G25370,AT1G48480,AT1G53910,AT1G71040,AT1G77640,AT2G17787,AT2G36050,AT2G41410,AT2G44578,AT2G47450,AT3G04930,AT3G05200,AT3G10490,AT3G11640,AT3G13700,AT3G16510,AT3G26710,AT3G47820,AT3G52960,AT3G55950,AT3G59940,AT3G63310,AT3G63410,AT4G11100,AT4G14870,AT4G17810,AT4G18670,AT4G22360,AT4G24570,AT4G25390,AT4G28050,AT5G04890,AT5G18970,AT5G21940,AT5G23850,AT5G24990,AT5G38300…
MA1221.1	RAP26	AP2/ERF domain	-1000 bp to TSS	207	1727	1.99515e-08	9.39716e-06	4.8596e-06	7.21744e-07	AT1G10140,AT1G11210,AT1G23040,AT1G25370,AT1G35420,AT1G53910,AT1G71040,AT2G30440,AT2G36050,AT2G41170,AT2G41410,AT2G44578,AT3G02840,AT3G05200,AT3G10490,AT3G11640,AT3G13700,AT3G16510,AT3G26710,AT3G47820,AT3G52960,AT3G55470,AT3G55950,AT3G59940,AT3G63310,AT3G63410,AT4G11220,AT4G14870,AT4G17810,AT4G18670,AT4G24570,AT4G28050,AT5G21940,AT5G22640,AT5G23850,AT5G24090,AT5G24990,AT5G38300,AT5G47220,AT5G55560…
MA1001.1	ERF11	AP2/ERF domain	-1000 bp to TSS	242	1727	2.21579e-08	1.04364e-05	4.8596e-06	7.21744e-07	AT1G10140,AT1G11210,AT1G23040,AT1G25370,AT1G35420,AT1G53910,AT1G71040,AT2G17787,AT2G36000,AT2G36050,AT2G41410,AT2G47450,AT3G02840,AT3G04930,AT3G05200,AT3G10490,AT3G11640,AT3G13700,AT3G16510,AT3G47820,AT3G52960,AT3G59940,AT3G63310,AT3G63410,AT4G11100,AT4G11220,AT4G13510,AT4G14870,AT4G18670,AT4G22360,AT4G24570,AT4G25390,AT4G28660,AT5G10780,AT5G23850,AT5G24090,AT5G24990,AT5G38300,AT5G46080,AT5G47220…
MA1000.2	ERF105	AP2/ERF domain	-1000 bp to TSS	193	1727	2.29855e-08	1.08262e-05	4.8596e-06	7.21744e-07	AT1G10140,AT1G11210,AT1G23040,AT1G25370,AT1G35420,AT1G48480,AT1G53910,AT1G71040,AT2G36000,AT2G36050,AT2G41410,AT2G44578,AT2G47450,AT3G02840,AT3G05200,AT3G10490,AT3G11640,AT3G13700,AT3G16510,AT3G47820,AT3G52960,AT3G55950,AT3G59940,AT3G63310,AT3G63410,AT4G11220,AT4G14870,AT4G18670,AT4G24570,AT4G25390,AT4G32020,AT5G04890,AT5G18970,AT5G21940,AT5G23850,AT5G24090,AT5G24990,AT5G38300,AT5G45110,AT5G46080…
MA0992.1	ERF4	AP2/ERF domain	-1000 bp to TSS	228	1727	2.99659e-08	1.41139e-05	5.93944e-06	8.8212e-07	AT1G10140,AT1G11210,AT1G23040,AT1G25370,AT1G53910,AT1G71040,AT2G17787,AT2G28150,AT2G36000,AT2G36050,AT2G41410,AT2G44578,AT3G02840,AT3G04930,AT3G05200,AT3G10490,AT3G11640,AT3G13700,AT3G16510,AT3G47820,AT3G52960,AT3G55470,AT3G59940,AT3G63310,AT3G63410,AT4G11220,AT4G13510,AT4G14870,AT4G17810,AT4G18670,AT4G22360,AT4G24570,AT4G25390,AT4G28050,AT4G28660,AT4G32020,AT5G04890,AT5G24090,AT5G24990,AT5G38300…
MA0994.1	ERF8	AP2/ERF domain	-1000 bp to TSS	232	1727	6.56025e-08	3.08988e-05	1.2238e-05	1.81758e-06	AT1G10140,AT1G11210,AT1G25370,AT1G35420,AT1G48480,AT1G61170,AT1G71040,AT1G72930,AT2G01450,AT2G28150,AT2G36000,AT2G36050,AT2G47450,AT3G02840,AT3G04930,AT3G05200,AT3G08860,AT3G10490,AT3G11640,AT3G13229,AT3G13700,AT3G16510,AT3G47820,AT3G59940,AT3G63310,AT3G63410,AT4G11220,AT4G13510,AT4G14870,AT4G18670,AT4G24570,AT4G25390,AT4G32020,AT5G04890,AT5G18970,AT5G21940,AT5G23850,AT5G24090,AT5G24990,AT5G38300…
MA1240.1	ERF10	AP2/ERF domain	-1000 bp to TSS	181	1727	7.33809e-08	3.45624e-05	1.29285e-05	1.92013e-06	AT1G01355,AT1G07530,AT1G10140,AT1G11210,AT1G23040,AT1G25370,AT1G35420,AT1G53910,AT2G27720,AT2G36050,AT2G41170,AT2G41410,AT2G44578,AT2G47450,AT3G02840,AT3G05200,AT3G11640,AT3G13700,AT3G16510,AT3G26510,AT3G26710,AT3G47820,AT3G52960,AT3G55950,AT3G63310,AT3G63410,AT4G14870,AT4G18670,AT4G24570,AT4G32020,AT5G04890,AT5G21940,AT5G22640,AT5G23850,AT5G24090,AT5G24990,AT5G38300,AT5G47220,AT5G65220,AT1G04250…
MA1237.1	AT4G16750	AP2/ERF domain	-1000 bp to TSS	208	1727	8.03532e-08	3.78464e-05	1.34118e-05	1.99191e-06	AT1G06190,AT1G10140,AT1G11210,AT1G18570,AT1G23040,AT1G25370,AT1G31130,AT1G35420,AT1G48480,AT1G53910,AT1G67920,AT2G04780,AT2G17290,AT2G40150,AT2G41410,AT2G42870,AT3G11640,AT3G13229,AT3G13700,AT3G16510,AT3G47800,AT3G51230,AT3G52960,AT3G55470,AT3G55950,AT3G59940,AT3G63310,AT3G63410,AT4G12070,AT4G14870,AT4G15490,AT4G18670,AT4G24570,AT4G35310,AT5G23850,AT5G24090,AT5G24990,AT5G38300,AT5G46080,AT5G58650…
MA1216.1	RAP21	AP2/ERF domain	-1000 bp to TSS	226	1727	9.63643e-08	4.53876e-05	1.528e-05	2.26938e-06	AT1G10140,AT1G11210,AT1G23040,AT1G25370,AT1G33290,AT1G35420,AT1G48480,AT1G53910,AT2G04780,AT2G17290,AT2G40150,AT2G47450,AT3G10490,AT3G11640,AT3G11820,AT3G13229,AT3G16510,AT3G51230,AT3G52960,AT3G55470,AT3G55950,AT3G59940,AT3G63310,AT3G63410,AT4G11100,AT4G11850,AT4G12070,AT4G13510,AT4G14870,AT4G17810,AT4G18670,AT4G24570,AT4G28050,AT4G35310,AT5G21940,AT5G24990,AT5G38300,AT5G60790,AT5G62280,AT5G65200…
MA1262.1	ERF2	AP2/ERF domain	-1000 bp to TSS	161	1727	1.687e-07	7.94576e-05	2.52338e-05	3.74771e-06	AT1G01355,AT1G07530,AT1G10140,AT1G11210,AT1G23040,AT1G25370,AT1G35420,AT1G48480,AT1G53910,AT2G27720,AT2G36050,AT2G41170,AT2G41410,AT2G44578,AT2G47450,AT3G02840,AT3G05200,AT3G10490,AT3G11640,AT3G13700,AT3G16510,AT3G26510,AT3G52960,AT3G55950,AT3G63310,AT3G63410,AT4G14870,AT4G18670,AT4G24570,AT5G04890,AT5G21940,AT5G22640,AT5G23850,AT5G24990,AT5G38300,AT5G47220,AT5G65220,AT1G04250,AT1G08280,AT1G15830…
MA1264.1	ESE1	AP2/ERF domain	-1000 bp to TSS	187	1727	1.75052e-07	8.24496e-05	2.52338e-05	3.74771e-06	AT1G07530,AT1G10140,AT1G11210,AT1G23040,AT1G25370,AT1G35420,AT1G53910,AT1G71040,AT2G36000,AT2G36050,AT2G41410,AT2G44578,AT2G47450,AT3G02840,AT3G05200,AT3G10490,AT3G11640,AT3G13700,AT3G16510,AT3G47820,AT3G52960,AT3G55950,AT3G63310,AT3G63410,AT4G11220,AT4G14870,AT4G18670,AT4G24570,AT4G28050,AT4G32020,AT5G04890,AT5G21940,AT5G23850,AT5G24990,AT5G38300,AT5G47220,AT5G65200,AT5G65220,AT1G04250,AT1G15830…
MA1265.1	AT4G31060	AP2/ERF domain	-1000 bp to TSS	230	1727	1.86538e-07	8.78592e-05	2.57204e-05	3.81997e-06	AT1G10140,AT1G11210,AT1G23040,AT1G25370,AT1G35420,AT1G48480,AT1G53910,AT1G56010,AT2G04780,AT2G40270,AT2G41410,AT2G43030,AT3G03820,AT3G11640,AT3G11820,AT3G13229,AT3G13700,AT3G16510,AT3G18960,AT3G47800,AT3G51230,AT3G52960,AT3G55950,AT3G57750,AT3G59940,AT3G63310,AT3G63410,AT4G11100,AT4G11220,AT4G12070,AT4G15270,AT4G17810,AT4G18670,AT4G24570,AT4G28050,AT5G23850,AT5G24990,AT5G38300,AT5G46080,AT5G47220…
MA1247.1	AT1G28160	AP2/ERF domain	-1000 bp to TSS	183	1727	1.97426e-07	9.29874e-05	2.59512e-05	3.85425e-06	AT1G10140,AT1G11210,AT1G23040,AT1G25370,AT1G35420,AT1G53910,AT1G71040,AT2G36050,AT2G41170,AT2G41410,AT2G44578,AT3G02840,AT3G05200,AT3G10490,AT3G11640,AT3G13700,AT3G16510,AT3G26710,AT3G47820,AT3G52960,AT3G55950,AT3G59940,AT3G63310,AT3G63410,AT4G11220,AT4G14870,AT4G18670,AT4G24570,AT4G28050,AT5G18970,AT5G21940,AT5G23850,AT5G24090,AT5G24990,AT5G38300,AT5G45110,AT5G47220,AT5G65220,AT1G04250,AT1G08280…
MA0979.1	ERF008	AP2/ERF domain	-1000 bp to TSS	219	1727	2.04578e-07	9.63563e-05	2.59512e-05	3.85425e-06	AT1G10140,AT1G11210,AT1G25370,AT1G25500,AT1G35420,AT1G48480,AT1G71040,AT2G21500,AT2G28150,AT2G36000,AT2G36050,AT2G41170,AT3G02840,AT3G04930,AT3G05200,AT3G10490,AT3G11640,AT3G13229,AT3G13700,AT3G16510,AT3G18960,AT3G47820,AT3G57750,AT3G59940,AT3G63310,AT3G63410,AT4G11220,AT4G12070,AT4G13510,AT4G14870,AT4G15490,AT4G17810,AT4G18670,AT4G24570,AT4G25390,AT4G32020,AT5G04890,AT5G09995,AT5G23850,AT5G24090…
MA1251.1	DEAR5	AP2/ERF domain	-1000 bp to TSS	254	1727	2.19212e-07	0.000103249	2.67381e-05	3.97112e-06	AT1G10140,AT1G11210,AT1G25370,AT1G25500,AT1G30520,AT1G33290,AT1G35420,AT1G48480,AT1G53910,AT1G67920,AT1G73130,AT2G04780,AT2G17290,AT2G37660,AT2G40150,AT2G42870,AT2G47450,AT3G03820,AT3G11820,AT3G13229,AT3G16510,AT3G26510,AT3G47800,AT3G51230,AT3G55470,AT3G55950,AT3G59940,AT3G63310,AT3G63410,AT4G11220,AT4G11850,AT4G12070,AT4G13510,AT4G15270,AT4G15490,AT4G17300,AT4G18670,AT4G22490,AT4G24570,AT4G28050…
MA0993.1	ERF7	AP2/ERF domain	-1000 bp to TSS	246	1727	3.29767e-07	0.00015532	3.79073e-05	5.62996e-06	AT1G06190,AT1G10140,AT1G11210,AT1G23040,AT1G25370,AT1G35420,AT1G71040,AT1G72930,AT2G01450,AT2G28150,AT2G36000,AT2G36050,AT2G47450,AT3G02840,AT3G04930,AT3G05200,AT3G08860,AT3G10490,AT3G11640,AT3G13229,AT3G13700,AT3G16510,AT3G47820,AT3G59940,AT3G63310,AT3G63410,AT4G11220,AT4G13510,AT4G14870,AT4G17900,AT4G18670,AT4G24570,AT4G25390,AT4G32020,AT5G04890,AT5G18970,AT5G21940,AT5G23850,AT5G24090,AT5G24990…
MA1004.1	ERF13_MA1004.1	AP2/ERF domain	-1000 bp to TSS	258	1727	3.3469e-07	0.000157639	3.79073e-05	5.62996e-06	AT1G06190,AT1G10140,AT1G11210,AT1G23040,AT1G25370,AT1G61170,AT1G71040,AT1G72930,AT2G01450,AT2G28150,AT2G36000,AT2G36050,AT2G41170,AT2G47450,AT3G02840,AT3G04930,AT3G05200,AT3G08860,AT3G10490,AT3G11640,AT3G13229,AT3G13700,AT3G16510,AT3G47820,AT3G59940,AT3G63310,AT3G63410,AT4G11220,AT4G13510,AT4G14870,AT4G17900,AT4G18670,AT4G24570,AT4G25390,AT4G28390,AT4G32020,AT5G04890,AT5G10780,AT5G18970,AT5G21940…
MA0975.1	CRF2	AP2/ERF domain	-1000 bp to TSS	254	1727	3.64294e-07	0.000171583	3.98376e-05	5.91664e-06	AT1G10140,AT1G11210,AT1G18390,AT1G23040,AT1G25370,AT1G53910,AT1G71040,AT1G72640,AT2G17787,AT2G28150,AT2G36000,AT2G36050,AT2G41170,AT2G41410,AT2G42870,AT2G44578,AT2G47450,AT3G02840,AT3G04930,AT3G05200,AT3G10490,AT3G11640,AT3G13700,AT3G16510,AT3G47820,AT3G52960,AT3G59940,AT3G63410,AT4G11220,AT4G13510,AT4G14870,AT4G18670,AT4G22360,AT4G24570,AT4G25390,AT4G28050,AT4G32020,AT5G04890,AT5G10780,AT5G18970…
MA1053.1	ERF109	AP2/ERF domain	-1000 bp to TSS	233	1727	4.15393e-07	0.00019565	4.39113e-05	6.52167e-06	AT1G07630,AT1G10140,AT1G11210,AT1G25370,AT1G35420,AT1G53910,AT1G71040,AT1G74470,AT2G17787,AT2G36050,AT2G41410,AT2G42870,AT2G44578,AT2G47450,AT3G02840,AT3G04930,AT3G05200,AT3G10490,AT3G11640,AT3G13700,AT3G16510,AT3G47820,AT3G52960,AT3G55470,AT3G63410,AT4G11100,AT4G11220,AT4G18670,AT4G22360,AT4G24570,AT4G25390,AT4G28050,AT4G28660,AT5G10780,AT5G23850,AT5G24090,AT5G24990,AT5G38300,AT5G42070,AT5G47220…
MA1005.1	ERF3	AP2/ERF domain	-1000 bp to TSS	259	1727	4.99221e-07	0.000235133	5.10705e-05	7.58495e-06	AT1G10140,AT1G11210,AT1G23040,AT1G25370,AT1G35420,AT1G61170,AT1G71040,AT1G72930,AT2G01450,AT2G28150,AT2G36000,AT2G36050,AT2G47450,AT3G02840,AT3G04930,AT3G05200,AT3G08860,AT3G10490,AT3G11640,AT3G13229,AT3G13700,AT3G16510,AT3G47820,AT3G55470,AT3G59940,AT3G63310,AT3G63410,AT4G11220,AT4G13510,AT4G14870,AT4G17900,AT4G18670,AT4G24570,AT4G25390,AT4G28050,AT4G32020,AT5G04890,AT5G18970,AT5G21940,AT5G23850…
MA1231.1	ERF15	AP2/ERF domain	-1000 bp to TSS	165	1727	5.55113e-07	0.000261458	5.50135e-05	8.17057e-06	AT1G01355,AT1G10140,AT1G11210,AT1G23040,AT1G25370,AT1G48480,AT1G53910,AT2G36000,AT2G36050,AT2G41170,AT2G41410,AT2G44578,AT3G02840,AT3G05200,AT3G10490,AT3G11640,AT3G13700,AT3G16510,AT3G47820,AT3G52960,AT3G55950,AT3G59940,AT3G63310,AT3G63410,AT4G11220,AT4G14870,AT4G18670,AT4G24570,AT4G32020,AT5G21940,AT5G23850,AT5G24090,AT5G24990,AT5G38300,AT5G46080,AT5G54470,AT5G62280,AT5G65200,AT5G65220,AT1G04250…
MA0995.1	ERF039	AP2/ERF domain	-1000 bp to TSS	226	1727	5.73537e-07	0.000270136	5.5117e-05	8.18593e-06	AT1G10140,AT1G11210,AT1G25370,AT1G53910,AT1G71040,AT2G04780,AT2G36050,AT2G40150,AT3G02840,AT3G03820,AT3G05200,AT3G10490,AT3G11640,AT3G13700,AT3G16510,AT3G47820,AT3G51230,AT3G59940,AT3G63310,AT3G63410,AT4G11220,AT4G11850,AT4G12070,AT4G15490,AT4G18670,AT4G24570,AT4G28050,AT5G04930,AT5G09995,AT5G23850,AT5G24090,AT5G38300,AT5G46080,AT5G58650,AT5G60790,AT5G62280,AT5G64940,AT5G65200,AT5G65220,AT1G04250…
MA1225.1	ERF5	AP2/ERF domain	-1000 bp to TSS	172	1727	6.56701e-07	0.000309306	5.98986e-05	8.89609e-06	AT1G07530,AT1G10140,AT1G11210,AT1G23040,AT1G25370,AT1G35420,AT1G53910,AT1G76955,AT2G27720,AT2G36050,AT2G41410,AT2G44578,AT2G47450,AT3G02840,AT3G05200,AT3G10490,AT3G11640,AT3G16510,AT3G47820,AT3G52960,AT3G55470,AT3G55950,AT3G59940,AT3G63310,AT3G63410,AT4G12070,AT4G14870,AT4G18670,AT4G24570,AT4G28050,AT5G21940,AT5G22640,AT5G23850,AT5G24990,AT5G38300,AT5G65220,AT1G04250,AT1G15830,AT1G27730,AT1G32350…
MA1220.1	TINY	AP2/ERF domain	-1000 bp to TSS	245	1727	6.61068e-07	0.000311363	5.98986e-05	8.89609e-06	AT1G10140,AT1G11210,AT1G18570,AT1G25370,AT1G31130,AT1G33290,AT1G35420,AT1G48480,AT1G53910,AT1G67920,AT2G04780,AT2G17290,AT2G40150,AT2G40270,AT3G10490,AT3G11820,AT3G13229,AT3G13700,AT3G16510,AT3G47800,AT3G51230,AT3G55950,AT3G57750,AT3G59940,AT3G63310,AT3G63410,AT4G11850,AT4G12070,AT4G15490,AT4G18670,AT4G24570,AT4G28050,AT4G35310,AT4G39050,AT5G04930,AT5G23850,AT5G24990,AT5G38300,AT5G46080,AT5G58650…
MA1259.1	AT1G01250	AP2/ERF domain	-1000 bp to TSS	246	1727	7.63961e-07	0.000359826	6.72988e-05	9.99516e-06	AT1G06190,AT1G10140,AT1G11210,AT1G23040,AT1G25370,AT1G31130,AT1G35420,AT1G48480,AT1G53910,AT1G56010,AT2G04780,AT2G17290,AT2G40150,AT2G40270,AT2G41410,AT2G42870,AT3G03820,AT3G08860,AT3G10490,AT3G11640,AT3G11820,AT3G13229,AT3G16510,AT3G47800,AT3G51230,AT3G55950,AT3G57750,AT3G59940,AT3G63310,AT3G63410,AT4G11220,AT4G11850,AT4G12070,AT4G15490,AT4G17300,AT4G17810,AT4G18580,AT4G18670,AT4G24570,AT4G28050…
MA0999.1	ERF098	AP2/ERF domain	-1000 bp to TSS	246	1727	8.21924e-07	0.000387126	7.04479e-05	1.04629e-05	AT1G10140,AT1G11210,AT1G23040,AT1G25370,AT1G53910,AT1G71040,AT2G17787,AT2G28150,AT2G36000,AT2G36050,AT2G41410,AT2G47450,AT3G02840,AT3G04930,AT3G05200,AT3G10490,AT3G11640,AT3G13700,AT3G16510,AT3G24929,AT3G47820,AT3G59940,AT3G63310,AT3G63410,AT4G11220,AT4G13510,AT4G14870,AT4G17810,AT4G18670,AT4G24570,AT4G25390,AT4G28660,AT4G32020,AT5G04890,AT5G10780,AT5G23850,AT5G24090,AT5G24990,AT5G38300,AT5G46080…
MA1234.1	AT1G19210	AP2/ERF domain	-1000 bp to TSS	284	1727	1.12949e-06	0.000531992	9.42625e-05	1.39998e-05	AT1G01500,AT1G10140,AT1G11210,AT1G21910,AT1G23040,AT1G25370,AT1G30520,AT1G33290,AT1G35420,AT1G56010,AT1G61170,AT1G67920,AT1G71790,AT1G76955,AT2G04780,AT2G21500,AT2G27720,AT2G36000,AT2G37660,AT2G41170,AT2G41410,AT2G47450,AT3G04930,AT3G11640,AT3G11820,AT3G13229,AT3G13700,AT3G16510,AT3G18960,AT3G47800,AT3G55470,AT3G55950,AT3G57750,AT3G59940,AT3G63310,AT3G63410,AT4G13510,AT4G14870,AT4G15270,AT4G15490…
MA1257.1	ERF9	AP2/ERF domain	-1000 bp to TSS	169	1727	1.20814e-06	0.000569036	9.82409e-05	1.45907e-05	AT1G07530,AT1G10140,AT1G11210,AT1G23040,AT1G25370,AT1G48480,AT1G53910,AT1G77640,AT2G17787,AT2G27720,AT2G36050,AT2G41410,AT2G47450,AT3G02840,AT3G04930,AT3G11640,AT3G13700,AT3G16510,AT3G26710,AT3G47820,AT3G52960,AT3G55950,AT3G59940,AT3G63310,AT3G63410,AT4G14870,AT4G17810,AT4G18670,AT4G22360,AT4G24570,AT5G04890,AT5G18970,AT5G21940,AT5G23850,AT5G24990,AT5G38300,AT5G47220,AT1G04250,AT1G07900,AT1G15830…
MA1245.1	AT2G33710	AP2/ERF domain	-1000 bp to TSS	193	1727	1.40531e-06	0.0006619	0.000109002	1.61889e-05	AT1G10140,AT1G11210,AT1G23040,AT1G25370,AT1G35420,AT1G53910,AT1G71040,AT1G76955,AT2G30440,AT2G36050,AT2G41410,AT2G44578,AT3G02840,AT3G05200,AT3G10490,AT3G11640,AT3G13700,AT3G16510,AT3G26710,AT3G47820,AT3G52960,AT3G55470,AT3G55950,AT3G59940,AT3G63310,AT3G63410,AT4G11220,AT4G14870,AT4G18670,AT4G24570,AT4G28050,AT5G21940,AT5G22640,AT5G23850,AT5G24990,AT5G38300,AT5G47220,AT5G55560,AT5G65200,AT5G65220…
MA1236.1	ESE3	AP2/ERF domain	-1000 bp to TSS	149	1727	1.40922e-06	0.000663745	0.000109002	1.61889e-05	AT1G07530,AT1G10140,AT1G11210,AT1G23040,AT1G25370,AT1G35420,AT1G74790,AT2G27720,AT2G36050,AT2G41410,AT2G44578,AT2G47450,AT3G02840,AT3G11640,AT3G13700,AT3G16510,AT3G52960,AT3G55950,AT3G59940,AT3G63310,AT3G63410,AT4G14870,AT4G17810,AT4G18670,AT4G24570,AT5G04890,AT5G23850,AT5G24990,AT5G38300,AT5G47220,AT5G54470,AT1G04250,AT1G09560,AT1G15830,AT1G32350,AT1G47655,AT1G59910,AT1G66190,AT2G17705,AT2G21280…
MA1238.1	ERF38	AP2/ERF domain	-1000 bp to TSS	213	1727	1.57093e-06	0.000739907	0.000118617	1.76168e-05	AT1G06190,AT1G10140,AT1G11210,AT1G18570,AT1G25370,AT1G35420,AT1G48480,AT1G53910,AT1G67920,AT2G04780,AT2G17290,AT2G40150,AT2G41410,AT2G42870,AT3G03820,AT3G10490,AT3G11640,AT3G13229,AT3G16510,AT3G47800,AT3G51230,AT3G55470,AT3G55950,AT3G59940,AT3G63310,AT3G63410,AT4G12070,AT4G14870,AT4G15270,AT4G15490,AT4G18580,AT4G18670,AT4G24570,AT4G28050,AT4G35310,AT5G24090,AT5G24990,AT5G38300,AT5G58650,AT5G60790…
MA1222.1	AT1G44830	AP2/ERF domain	-1000 bp to TSS	177	1727	1.76465e-06	0.00083115	0.000130145	1.93291e-05	AT1G01355,AT1G06190,AT1G07530,AT1G10140,AT1G11210,AT1G23040,AT1G25370,AT1G35420,AT1G48480,AT1G53910,AT1G69640,AT1G78260,AT2G04780,AT2G36000,AT2G41410,AT2G47450,AT3G10490,AT3G11640,AT3G11820,AT3G16510,AT3G47800,AT3G51960,AT3G52960,AT3G55950,AT3G59940,AT3G63310,AT3G63410,AT4G03320,AT4G12070,AT4G14870,AT4G18670,AT4G24570,AT5G22640,AT5G23850,AT5G24990,AT5G33290,AT5G38300,AT5G60790,AT5G63180,AT5G65200…
MA1254.1	ERF13_MA1254.1	AP2/ERF domain	-1000 bp to TSS	213	1727	1.97541e-06	0.000930418	0.000142378	2.11459e-05	AT1G10140,AT1G11210,AT1G25370,AT1G53910,AT1G71040,AT1G72930,AT2G02170,AT2G28150,AT2G36000,AT2G36050,AT2G41410,AT2G47450,AT3G02840,AT3G05200,AT3G10490,AT3G11640,AT3G13700,AT3G16510,AT3G47820,AT3G52960,AT3G55950,AT3G59940,AT3G63410,AT4G11220,AT4G12070,AT4G14870,AT4G18670,AT4G24570,AT4G25390,AT4G28390,AT4G32020,AT5G04890,AT5G10780,AT5G18970,AT5G23850,AT5G24090,AT5G24990,AT5G38300,AT5G45110,AT5G46080…
MA0997.1	ERF069	AP2/ERF domain	-1000 bp to TSS	223	1727	2.04372e-06	0.000962591	0.000144028	2.13909e-05	AT1G10140,AT1G11210,AT1G18390,AT1G23040,AT1G25370,AT1G35420,AT1G53910,AT1G71040,AT1G72640,AT2G36000,AT2G36050,AT2G41170,AT2G42870,AT2G44578,AT2G47450,AT3G02840,AT3G04930,AT3G05200,AT3G10490,AT3G11640,AT3G13700,AT3G16510,AT3G47820,AT3G52960,AT3G59940,AT3G63310,AT3G63410,AT4G11220,AT4G13510,AT4G14870,AT4G18670,AT4G22360,AT4G24570,AT4G25390,AT4G28050,AT4G28660,AT5G18970,AT5G23850,AT5G24090,AT5G24990…
MA1376.1	DEAR3	AP2/ERF domain	-1000 bp to TSS	262	1727	2.97762e-06	0.00140246	0.000205282	3.04883e-05	AT1G10140,AT1G11210,AT1G18570,AT1G23040,AT1G25370,AT1G25500,AT1G30520,AT1G33290,AT1G35420,AT1G48480,AT1G53910,AT1G71040,AT1G73130,AT2G04780,AT2G17290,AT2G21500,AT2G36000,AT2G37660,AT2G40150,AT2G42870,AT2G47450,AT3G03820,AT3G04930,AT3G11820,AT3G13229,AT3G16510,AT3G26510,AT3G47800,AT3G51230,AT3G55470,AT3G55950,AT3G59940,AT3G63410,AT4G11220,AT4G11850,AT4G12070,AT4G13510,AT4G15270,AT4G15490,AT4G18670…
MA1228.1	AT4G18450	AP2/ERF domain	-1000 bp to TSS	177	1727	3.44716e-06	0.00162361	0.000232596	3.4545e-05	AT1G01355,AT1G10140,AT1G11210,AT1G23040,AT1G25370,AT1G35420,AT1G53910,AT1G71040,AT2G36050,AT2G41170,AT2G41410,AT2G44578,AT2G47450,AT3G02840,AT3G05200,AT3G10490,AT3G11640,AT3G13700,AT3G16510,AT3G47820,AT3G52960,AT3G55950,AT3G63310,AT3G63410,AT4G11220,AT4G14870,AT4G18670,AT4G24570,AT5G04890,AT5G21940,AT5G22640,AT5G23850,AT5G24090,AT5G24990,AT5G38300,AT5G46080,AT5G47220,AT5G62280,AT5G65200,AT5G65220…
MA1252.1	PUCHI	AP2/ERF domain	-1000 bp to TSS	176	1727	3.95101e-06	0.00186092	0.000261039	3.87692e-05	AT1G10140,AT1G11210,AT1G23040,AT1G25370,AT1G35420,AT1G53910,AT1G71040,AT1G76955,AT2G36050,AT2G41170,AT2G41410,AT2G44578,AT3G02840,AT3G05200,AT3G10490,AT3G11640,AT3G13700,AT3G16510,AT3G26710,AT3G47820,AT3G52960,AT3G55950,AT3G63310,AT3G63410,AT4G11220,AT4G12070,AT4G14870,AT4G18670,AT4G24570,AT4G28050,AT5G18970,AT5G21940,AT5G23850,AT5G24990,AT5G38300,AT5G45110,AT5G47220,AT5G65220,AT1G04250,AT1G08280…
MA1243.1	DREB19	AP2/ERF domain	-1000 bp to TSS	238	1727	4.17598e-06	0.00196689	0.000270272	4.01406e-05	AT1G10140,AT1G11210,AT1G23040,AT1G25370,AT1G25500,AT1G33290,AT1G35420,AT1G48480,AT1G73130,AT1G78420,AT2G02170,AT2G02710,AT2G04780,AT2G17290,AT2G21500,AT2G36000,AT2G41410,AT2G43030,AT3G09830,AT3G13229,AT3G16510,AT3G52960,AT3G55950,AT3G59940,AT3G63410,AT4G11100,AT4G13510,AT4G13670,AT4G22490,AT4G25390,AT4G27430,AT4G35310,AT5G04930,AT5G14790,AT5G24990,AT5G33290,AT5G38300,AT5G62280,AT5G62740,AT5G65200…
MA1260.1	AT1G77640	AP2/ERF domain	-1000 bp to TSS	197	1727	5.31233e-06	0.00250211	0.000330521	4.90887e-05	AT1G07530,AT1G10140,AT1G11210,AT1G23040,AT1G25370,AT1G35420,AT1G48480,AT1G53910,AT1G56010,AT1G78260,AT2G04780,AT2G40150,AT2G40270,AT2G41410,AT2G42870,AT3G11640,AT3G11820,AT3G13229,AT3G16510,AT3G26510,AT3G47800,AT3G52960,AT3G55950,AT3G59940,AT3G63310,AT3G63410,AT4G11100,AT4G11220,AT4G12070,AT4G15270,AT4G17810,AT4G18670,AT4G24570,AT4G28050,AT5G23850,AT5G38300,AT5G60790,AT5G63180,AT5G65200,AT1G04680…
MA1250.1	AT1G75490	AP2/ERF domain	-1000 bp to TSS	162	1727	5.31533e-06	0.00250352	0.000330521	4.90887e-05	AT1G07530,AT1G10140,AT1G11210,AT1G23040,AT1G25370,AT1G35420,AT1G53910,AT1G78260,AT2G27720,AT2G36050,AT2G41410,AT2G47450,AT3G10490,AT3G11640,AT3G16510,AT3G52960,AT3G55950,AT3G59940,AT3G63310,AT3G63410,AT4G03320,AT4G13510,AT4G18670,AT4G24570,AT5G21940,AT5G23850,AT5G33290,AT5G38300,AT5G60790,AT5G62280,AT5G65200,AT1G04250,AT1G09560,AT1G15830,AT1G27730,AT1G32350,AT1G33030,AT1G58235,AT1G59910,AT1G66190…
MA1266.1	RAP211	AP2/ERF domain	-1000 bp to TSS	203	1727	5.52526e-06	0.0026024	0.000336967	5.00461e-05	AT1G10140,AT1G11210,AT1G23040,AT1G25370,AT1G35420,AT1G53910,AT1G61170,AT1G71040,AT1G78260,AT2G01450,AT2G27720,AT2G36050,AT2G41170,AT2G41410,AT2G44578,AT2G47450,AT3G04930,AT3G11640,AT3G11820,AT3G13700,AT3G16510,AT3G24929,AT3G55950,AT3G59940,AT3G63310,AT3G63410,AT4G11220,AT4G14870,AT4G18670,AT4G28390,AT5G04890,AT5G18970,AT5G21940,AT5G23850,AT5G24090,AT5G24990,AT5G38300,AT5G42070,AT5G47220,AT5G62280…
MA0567.1	ERF1B	AP2/ERF domain	-1000 bp to TSS	259	1727	6.24255e-06	0.00294024	0.000373529	5.54762e-05	AT1G06190,AT1G10140,AT1G11210,AT1G23040,AT1G25370,AT1G35420,AT1G71040,AT1G74790,AT2G28150,AT2G36000,AT2G36050,AT2G40270,AT2G47450,AT3G02840,AT3G03820,AT3G05200,AT3G08760,AT3G08860,AT3G10490,AT3G11640,AT3G13700,AT3G16510,AT3G47820,AT3G59940,AT3G63410,AT4G11220,AT4G13510,AT4G14870,AT4G17900,AT4G18670,AT4G24570,AT4G25390,AT4G32020,AT5G04550,AT5G04890,AT5G10780,AT5G24090,AT5G24990,AT5G38300,AT5G45110…
MA1246.1	LEP	AP2/ERF domain	-1000 bp to TSS	153	1727	7.06838e-06	0.00332921	0.000415111	6.1652e-05	AT1G10140,AT1G11210,AT1G25370,AT1G48480,AT1G53910,AT2G36050,AT2G41410,AT2G44578,AT2G47450,AT3G04930,AT3G11640,AT3G13700,AT3G16510,AT3G26710,AT3G47820,AT3G52960,AT3G55950,AT3G59940,AT3G63310,AT3G63410,AT4G14870,AT4G17810,AT4G18670,AT4G24570,AT5G18970,AT5G23850,AT5G24990,AT5G38300,AT5G47220,AT1G04250,AT1G15830,AT1G32350,AT1G59910,AT1G66190,AT2G17705,AT2G27090,AT2G36220,AT2G43120,AT2G45470,AT3G03470…
MA1229.1	AT2G44940	AP2/ERF domain	-1000 bp to TSS	245	1727	9.47778e-06	0.00446403	0.00054649	8.11643e-05	AT1G06190,AT1G10140,AT1G11210,AT1G18570,AT1G25370,AT1G33290,AT1G35420,AT1G48480,AT1G53910,AT1G67920,AT2G04780,AT2G17290,AT2G40150,AT2G40270,AT3G03820,AT3G11640,AT3G11820,AT3G13229,AT3G16510,AT3G47800,AT3G51230,AT3G55470,AT3G55950,AT3G57750,AT3G59940,AT3G63310,AT3G63410,AT4G11850,AT4G12070,AT4G14870,AT4G15490,AT4G18580,AT4G18670,AT4G24570,AT4G28050,AT4G35310,AT4G39050,AT5G04930,AT5G13820,AT5G23850…
MA1415.1	REF6	C2H2 zinc finger factors	-1000 bp to TSS	265	1727	1.08907e-05	0.00512954	0.000616748	9.15989e-05	AT1G07630,AT1G10140,AT1G30970,AT1G48480,AT1G61170,AT1G61800,AT1G64355,AT1G64950,AT1G68190,AT1G69640,AT1G71040,AT1G72930,AT1G74470,AT1G78420,AT2G28150,AT2G34660,AT2G37410,AT2G37660,AT2G41170,AT2G43030,AT2G44500,AT2G44740,AT3G02840,AT3G04420,AT3G08760,AT3G26710,AT3G49470,AT3G51230,AT3G52890,AT3G52960,AT4G04350,AT4G10960,AT4G11100,AT4G17250,AT4G17670,AT4G18580,AT4G25390,AT4G26120,AT4G28660,AT4G34730…
MA1219.1	CEJ1	AP2/ERF domain	-1000 bp to TSS	190	1727	1.52162e-05	0.00716681	0.000846581	0.000125734	AT1G06190,AT1G07530,AT1G10140,AT1G11210,AT1G23040,AT1G25370,AT1G35420,AT1G48480,AT1G69640,AT2G04780,AT2G36000,AT2G41410,AT2G42870,AT2G47450,AT3G10490,AT3G11640,AT3G11820,AT3G13229,AT3G16510,AT3G47800,AT3G52960,AT3G55950,AT3G59940,AT3G63310,AT3G63410,AT4G12070,AT4G13510,AT4G14870,AT4G18580,AT4G18670,AT4G22490,AT4G24570,AT5G13820,AT5G21940,AT5G24990,AT5G33290,AT5G38300,AT5G60790,AT5G62280,AT5G63180…
MA1002.1	ERF112	AP2/ERF domain	-1000 bp to TSS	220	1727	1.687e-05	0.00794575	0.000922411	0.000136996	AT1G10140,AT1G11210,AT1G23040,AT1G25370,AT1G35420,AT1G53910,AT1G64150,AT1G71040,AT2G36050,AT2G44578,AT2G47450,AT3G02840,AT3G05200,AT3G10490,AT3G11640,AT3G13700,AT3G16510,AT3G47820,AT3G52960,AT3G55470,AT3G59940,AT3G63410,AT4G11220,AT4G13510,AT4G14870,AT4G17810,AT4G18670,AT4G22360,AT4G24570,AT4G25390,AT4G28050,AT5G10780,AT5G21940,AT5G23850,AT5G24090,AT5G24990,AT5G38300,AT5G45110,AT5G46080,AT5G55560…
MA0998.1	ERF096	AP2/ERF domain	-1000 bp to TSS	236	1727	1.80706e-05	0.00851127	0.000971314	0.000144259	AT1G06190,AT1G10140,AT1G11210,AT1G23040,AT1G25370,AT1G35420,AT1G71040,AT2G28150,AT2G36000,AT2G36050,AT2G44578,AT2G47450,AT3G02840,AT3G04930,AT3G05200,AT3G08860,AT3G10490,AT3G11640,AT3G13229,AT3G13700,AT3G16510,AT3G47820,AT3G59940,AT3G63410,AT4G11220,AT4G13510,AT4G14870,AT4G17900,AT4G18670,AT4G24570,AT4G25390,AT4G32020,AT5G04890,AT5G10780,AT5G23850,AT5G24090,AT5G24990,AT5G38300,AT5G45110,AT5G46080…
MA1226.1	AT5G18450	AP2/ERF domain	-1000 bp to TSS	175	1727	2.73276e-05	0.0128713	0.0014444	0.000214521	AT1G01355,AT1G07530,AT1G10140,AT1G11210,AT1G23040,AT1G25370,AT1G30970,AT1G35420,AT1G48480,AT1G52670,AT1G53910,AT1G64950,AT1G72640,AT1G78260,AT2G01600,AT2G04780,AT2G27720,AT2G41410,AT2G47450,AT3G11640,AT3G13700,AT3G16510,AT3G26510,AT3G52960,AT3G55950,AT3G59940,AT3G63310,AT3G63410,AT4G00400,AT4G11100,AT4G17250,AT4G17810,AT4G18670,AT4G24570,AT5G04890,AT5G13820,AT5G27420,AT5G38300,AT5G45110,AT5G60790…
MA1255.1	AT1G22810	AP2/ERF domain	-1000 bp to TSS	163	1727	3.17494e-05	0.0149539	0.00165061	0.000245147	AT1G07530,AT1G10140,AT1G11210,AT1G23040,AT1G25370,AT1G35420,AT1G48480,AT1G53910,AT2G04780,AT2G27720,AT2G41410,AT2G47450,AT3G11640,AT3G11820,AT3G16510,AT3G52960,AT3G55950,AT3G59940,AT3G63310,AT3G63410,AT4G12070,AT4G17810,AT4G18670,AT4G24570,AT5G23850,AT5G27420,AT5G38300,AT5G60790,AT5G65200,AT1G04250,AT1G09560,AT1G15830,AT1G27730,AT1G33030,AT1G47655,AT1G59910,AT1G66190,AT1G75350,AT2G17705,AT2G27090…
MA1241.1	AT4G32800	AP2/ERF domain	-1000 bp to TSS	227	1727	3.31259e-05	0.0156023	0.0016944	0.00025165	AT1G10140,AT1G18570,AT1G35420,AT1G48480,AT1G53910,AT1G56010,AT1G67920,AT1G78180,AT2G04780,AT2G17290,AT2G31880,AT2G40150,AT2G40270,AT2G42210,AT3G03820,AT3G10490,AT3G11820,AT3G13229,AT3G13700,AT3G16510,AT3G26510,AT3G51230,AT3G55950,AT3G57750,AT3G59940,AT3G63410,AT4G11850,AT4G12070,AT4G15490,AT4G18670,AT4G24570,AT4G27430,AT4G28050,AT4G35310,AT4G39050,AT5G04930,AT5G23850,AT5G38300,AT5G46080,AT5G62280…
MA1334.1	GBF6	Basic leucine zipper factors (bZIP)	-1000 bp to TSS	217	1727	6.26795e-05	0.0295221	0.00315517	0.000468604	AT1G11210,AT1G18570,AT1G22280,AT1G52670,AT1G53290,AT1G61170,AT1G63110,AT1G63840,AT1G65820,AT1G67920,AT1G69490,AT1G71040,AT1G73130,AT1G74470,AT1G76870,AT1G78420,AT2G17500,AT2G19710,AT2G41170,AT2G47450,AT3G04420,AT3G05200,AT3G13360,AT3G26510,AT3G29631,AT3G45850,AT3G46730,AT3G51230,AT3G63410,AT4G15270,AT4G15490,AT4G15510,AT4G17300,AT4G24570,AT4G27430,AT4G27652,AT4G34730,AT4G34881,AT4G39890,AT5G13630…
MA0123.1	abi4	AP2/ERF domain	-1000 bp to TSS	221	1727	7.95289e-05	0.0374581	0.00394079	0.000585283	AT1G10140,AT1G10150,AT1G11210,AT1G23040,AT1G25370,AT1G53910,AT1G64150,AT1G72640,AT1G77640,AT2G17500,AT2G21500,AT2G36000,AT2G36050,AT2G41170,AT2G42870,AT2G44578,AT2G47450,AT3G02840,AT3G04060,AT3G04930,AT3G05200,AT3G08760,AT3G11640,AT3G13700,AT3G16510,AT3G47820,AT3G52960,AT3G55470,AT3G59940,AT3G61180,AT3G63310,AT3G63410,AT4G03320,AT4G11100,AT4G12070,AT4G13510,AT4G22490,AT4G24570,AT4G28050,AT4G28660…
MA1242.1	AT3G57600	AP2/ERF domain	-1000 bp to TSS	195	1727	8.32511e-05	0.0392113	0.00406177	0.00060325	AT1G07530,AT1G10140,AT1G11210,AT1G23040,AT1G25370,AT1G35420,AT1G53910,AT1G71040,AT2G04780,AT2G27720,AT2G36050,AT2G41170,AT2G44578,AT2G46680,AT2G47450,AT3G10490,AT3G11640,AT3G13229,AT3G16510,AT3G52960,AT3G55950,AT3G59940,AT3G63310,AT3G63410,AT4G03320,AT4G11100,AT4G11220,AT4G13510,AT4G17810,AT4G18670,AT4G24570,AT5G23850,AT5G38300,AT5G60790,AT5G65200,AT1G04250,AT1G09560,AT1G15830,AT1G26570,AT1G27730…
MA1261.1	AT5G67000	AP2/ERF domain	-1000 bp to TSS	201	1727	8.65855e-05	0.0407818	0.00416044	0.000617906	AT1G07530,AT1G10140,AT1G11210,AT1G25370,AT1G33050,AT1G35420,AT1G48480,AT1G53910,AT1G64150,AT1G77640,AT2G36000,AT2G36050,AT2G41410,AT2G44578,AT3G02840,AT3G05200,AT3G11640,AT3G16510,AT3G16910,AT3G26710,AT3G47820,AT3G52960,AT3G55950,AT3G59940,AT3G63310,AT3G63410,AT4G00355,AT4G14870,AT4G17810,AT4G18670,AT4G24570,AT4G28390,AT5G18970,AT5G21940,AT5G23850,AT5G24990,AT5G38300,AT5G47220,AT5G54470,AT5G65200…
MA1347.1	bZIP68_MA1347.1	Basic leucine zipper factors (bZIP)	-1000 bp to TSS	194	1727	9.82035e-05	0.0462539	0.00464826	0.000690356	AT1G01500,AT1G11210,AT1G60950,AT1G63840,AT1G65820,AT1G67920,AT1G71040,AT1G73130,AT1G77640,AT2G31880,AT2G39710,AT2G40150,AT2G41170,AT2G41410,AT2G44578,AT2G47450,AT3G26510,AT3G29631,AT3G46530,AT3G46730,AT3G59940,AT4G00355,AT4G15270,AT4G15490,AT4G17300,AT4G24570,AT4G34730,AT5G05190,AT5G15260,AT5G22350,AT5G23850,AT5G24990,AT5G27420,AT5G47220,AT5G58650,AT5G63180,AT5G64040,AT1G06360,AT1G07820,AT1G12460…
MA1197.1	CAMTA1	Other	-1000 bp to TSS	159	1727	0.000121499	0.0572262	0.00566635	0.000841561	AT1G12940,AT1G25370,AT1G35420,AT1G53290,AT1G56010,AT1G64670,AT2G01600,AT2G04780,AT2G17500,AT2G36050,AT2G42870,AT2G43030,AT3G02840,AT3G05200,AT3G13229,AT3G46730,AT3G47820,AT3G55950,AT4G00355,AT4G24570,AT4G27652,AT5G23850,AT5G27420,AT5G46080,AT5G54470,AT5G58650,AT5G62280,AT5G63780,AT5G64040,AT5G65200,AT1G13260,AT1G35140,AT1G48520,AT1G50570,AT1G52340,AT1G59590,AT1G79380,AT1G80080,AT1G80610,AT2G03350…
MA1344.1	bZIP28	Basic leucine zipper factors (bZIP)	-1000 bp to TSS	186	1727	0.000135175	0.0636674	0.00621278	0.000922717	AT1G01500,AT1G11210,AT1G60950,AT1G63840,AT1G65820,AT1G67920,AT1G71040,AT1G76870,AT1G77640,AT2G31880,AT2G39710,AT2G41170,AT2G41410,AT2G44578,AT2G47450,AT3G26510,AT3G29631,AT3G46530,AT3G46730,AT3G59940,AT4G15270,AT4G15490,AT4G15510,AT4G24570,AT4G34730,AT4G34881,AT5G04890,AT5G05190,AT5G08790,AT5G21940,AT5G22350,AT5G23850,AT5G24990,AT5G27420,AT5G47220,AT5G55560,AT5G58650,AT5G63180,AT5G64040,AT1G06360…
MA1351.1	GBF3	Basic leucine zipper factors (bZIP)	-1000 bp to TSS	213	1727	0.000137386	0.0647088	0.00622412	0.000924402	AT1G01500,AT1G11210,AT1G56460,AT1G60950,AT1G61170,AT1G63840,AT1G65820,AT1G67920,AT1G71040,AT1G72930,AT1G76870,AT2G19710,AT2G31880,AT2G39710,AT2G41170,AT2G41410,AT2G44578,AT2G47450,AT3G26510,AT3G29631,AT3G46530,AT3G46730,AT3G59940,AT3G63410,AT4G00355,AT4G15270,AT4G15490,AT4G24570,AT4G34730,AT4G34881,AT5G05190,AT5G15260,AT5G22350,AT5G23850,AT5G24990,AT5G27420,AT5G47220,AT5G58650,AT5G60790,AT5G64040…
MA1340.1	bZIP3	Basic leucine zipper factors (bZIP)	-1000 bp to TSS	222	1727	0.000139347	0.0656325	0.00622412	0.000924402	AT1G01500,AT1G11210,AT1G22280,AT1G60950,AT1G61170,AT1G63110,AT1G63840,AT1G65820,AT1G67920,AT1G71040,AT1G73130,AT1G74470,AT1G76870,AT2G19710,AT2G31880,AT2G39710,AT2G40150,AT2G41170,AT2G41410,AT2G44578,AT2G47450,AT3G11640,AT3G13360,AT3G26510,AT3G29631,AT3G46730,AT3G51230,AT3G59940,AT3G63410,AT4G15270,AT4G15490,AT4G15510,AT4G17300,AT4G24570,AT4G34730,AT4G34881,AT5G08790,AT5G13630,AT5G15260,AT5G22350…
MA1006.1	ERF6	AP2/ERF domain	-1000 bp to TSS	259	1727	0.000143153	0.0674251	0.00630531	0.000936459	AT1G10140,AT1G11210,AT1G23040,AT1G25370,AT1G61170,AT1G71040,AT2G01450,AT2G36000,AT2G36050,AT2G41170,AT2G44578,AT3G02840,AT3G05200,AT3G08860,AT3G10490,AT3G11640,AT3G13229,AT3G13700,AT3G16510,AT3G24929,AT3G47820,AT3G59940,AT3G63310,AT3G63410,AT4G11220,AT4G13510,AT4G14870,AT4G17810,AT4G18670,AT4G22360,AT4G24570,AT4G25390,AT4G28660,AT4G32020,AT4G34881,AT5G18970,AT5G24090,AT5G24990,AT5G38300,AT5G45110…
MA1341.1	bZIP53	Basic leucine zipper factors (bZIP)	-1000 bp to TSS	210	1727	0.0001733	0.0816242	0.00752859	0.00111814	AT1G11210,AT1G18570,AT1G22280,AT1G53290,AT1G61170,AT1G63110,AT1G63840,AT1G65820,AT1G67920,AT1G69490,AT1G71040,AT1G73130,AT1G74470,AT1G76870,AT1G78420,AT2G17500,AT2G19710,AT2G41170,AT3G04420,AT3G05200,AT3G13360,AT3G26510,AT3G29631,AT3G51230,AT3G63410,AT4G15270,AT4G15490,AT4G15510,AT4G17300,AT4G24570,AT4G27430,AT4G27652,AT4G34730,AT4G34881,AT4G39890,AT5G13630,AT5G46080,AT5G47220,AT5G58650,AT5G60790…
MA0552.1	PIF1	Basic helix-loop-helix factors (bHLH)	-1000 bp to TSS	178	1727	0.000185701	0.0874651	0.0079583	0.00118196	AT1G01500,AT1G10140,AT1G10150,AT1G15910,AT1G60950,AT2G19710,AT2G31880,AT2G39710,AT2G40150,AT2G41170,AT2G44578,AT2G47450,AT3G05200,AT3G26510,AT3G53580,AT3G59940,AT4G00400,AT4G15270,AT4G24570,AT4G34881,AT5G04890,AT5G22350,AT5G23850,AT5G27420,AT5G47220,AT5G58650,AT5G63180,AT1G12460,AT1G13260,AT1G25450,AT1G35140,AT1G44575,AT1G47655,AT1G51400,AT1G55110,AT1G55265,AT1G55370,AT1G68690,AT2G05790,AT2G17705…
MA1230.1	AT1G77200	AP2/ERF domain	-1000 bp to TSS	233	1727	0.000196068	0.0923481	0.00829057	0.00123131	AT1G10140,AT1G11210,AT1G18570,AT1G25370,AT1G35420,AT1G48480,AT1G53910,AT1G67920,AT2G04780,AT2G17290,AT2G40150,AT2G40270,AT3G03820,AT3G10490,AT3G11820,AT3G13229,AT3G13700,AT3G16510,AT3G51230,AT3G55950,AT3G57750,AT3G59940,AT3G63310,AT3G63410,AT4G11850,AT4G12070,AT4G15490,AT4G18670,AT4G24570,AT4G27430,AT4G28050,AT4G35310,AT4G39050,AT5G04930,AT5G09995,AT5G23850,AT5G38300,AT5G46080,AT5G58650,AT5G60790…
MA0930.1	ABF3	Basic leucine zipper factors (bZIP)	-1000 bp to TSS	205	1727	0.000222458	0.104778	0.00928268	0.00137866	AT1G01355,AT1G01500,AT1G07630,AT1G22800,AT1G30520,AT1G30970,AT1G56010,AT1G67920,AT1G71790,AT1G77640,AT2G20310,AT2G31880,AT2G34660,AT2G38720,AT2G41170,AT2G41835,AT2G44578,AT2G47450,AT3G05200,AT3G16910,AT3G26510,AT3G46730,AT3G51730,AT3G59940,AT4G00355,AT4G13670,AT4G15510,AT5G05190,AT5G23850,AT5G27420,AT5G33290,AT5G47220,AT5G55560,AT5G58650,AT5G63180,AT1G03550,AT1G04680,AT1G07570,AT1G25141,AT1G35140…
MA0941.1	ABF2	Basic leucine zipper factors (bZIP)	-1000 bp to TSS	144	1727	0.000248519	0.117052	0.0102293	0.00151924	AT1G01500,AT1G07630,AT1G56460,AT1G60950,AT1G77640,AT2G31880,AT2G38720,AT2G39710,AT2G41170,AT2G44578,AT2G47450,AT3G26510,AT3G59940,AT4G00355,AT4G15270,AT4G24570,AT5G04890,AT5G05190,AT5G08790,AT5G21940,AT5G23850,AT5G27420,AT5G47220,AT5G58650,AT5G63180,AT1G06360,AT1G09560,AT1G25450,AT1G35140,AT1G47655,AT1G51400,AT1G52340,AT1G55265,AT1G55370,AT1G68690,AT2G05790,AT2G27090,AT2G32830,AT2G38340,AT2G39190…
MA1023.1	PHYPADRAFT_28324	AP2/ERF domain	-1000 bp to TSS	200	1727	0.000254186	0.119722	0.0102293	0.00151924	AT1G10140,AT1G25370,AT1G33290,AT1G35420,AT1G53910,AT1G63840,AT1G78420,AT2G01600,AT2G02170,AT2G04780,AT2G17290,AT2G17787,AT2G21500,AT2G40150,AT2G40270,AT2G42870,AT3G03820,AT3G08760,AT3G13700,AT3G16510,AT3G20350,AT3G51230,AT3G59940,AT3G63410,AT4G00355,AT4G11850,AT4G12070,AT4G15490,AT4G18580,AT4G18670,AT4G22490,AT4G27430,AT4G28050,AT4G35310,AT5G04930,AT5G09995,AT5G13820,AT5G23850,AT5G38300,AT5G46080…
MA1010.1	PHYPADRAFT_64121	AP2/ERF domain	-1000 bp to TSS	263	1727	0.00025482	0.12002	0.0102293	0.00151924	AT1G06190,AT1G07530,AT1G15910,AT1G18570,AT1G33290,AT1G35420,AT1G48480,AT1G67920,AT1G73130,AT2G02710,AT2G04780,AT2G17290,AT2G17500,AT2G40150,AT2G40270,AT3G04420,AT3G08760,AT3G13229,AT3G16510,AT3G26510,AT3G51230,AT3G55950,AT3G57750,AT3G59940,AT3G63310,AT4G04350,AT4G11220,AT4G15270,AT4G15490,AT4G27430,AT4G32020,AT4G34730,AT4G35310,AT4G37120,AT4G39050,AT5G04550,AT5G04930,AT5G22640,AT5G23850,AT5G24090…
MA1253.1	AT3G16280	AP2/ERF domain	-1000 bp to TSS	230	1727	0.000262302	0.123544	0.010398	0.0015443	AT1G10140,AT1G18570,AT1G25370,AT1G33290,AT1G53910,AT1G64355,AT1G67920,AT1G78180,AT2G02710,AT2G04780,AT2G17290,AT2G17500,AT2G37410,AT2G39710,AT2G40150,AT2G40270,AT2G44990,AT2G47450,AT3G03820,AT3G10490,AT3G13229,AT3G16510,AT3G26510,AT3G51230,AT3G55470,AT3G55950,AT3G57750,AT3G59940,AT3G63410,AT4G00355,AT4G00400,AT4G11220,AT4G11850,AT4G12070,AT4G15490,AT4G18580,AT4G18670,AT4G22490,AT4G28050,AT4G35310…
MA0570.1	ABF1	Basic leucine zipper factors (bZIP)	-1000 bp to TSS	188	1727	0.00036767	0.173172	0.014395	0.00213793	AT1G01500,AT1G11210,AT1G23040,AT1G53910,AT1G60950,AT1G61800,AT1G65820,AT1G67920,AT1G71040,AT1G72930,AT1G74790,AT1G77640,AT2G31880,AT2G36000,AT2G39710,AT2G41170,AT2G42870,AT2G44578,AT2G47450,AT3G11640,AT3G46530,AT3G46730,AT3G59940,AT4G15270,AT4G15490,AT4G24570,AT4G39050,AT5G04890,AT5G08790,AT5G21940,AT5G23850,AT5G27420,AT5G40950,AT5G47220,AT5G58650,AT5G63180,AT5G64630,AT1G06360,AT1G15890,AT1G23870…
MA1413.1	UIF1	Helix-Turn-Helix	-1000 bp to TSS	251	1727	0.000478893	0.225559	0.0185209	0.00275071	AT1G07630,AT1G18570,AT1G25370,AT1G52670,AT1G74790,AT1G77640,AT2G04780,AT2G11520,AT2G18700,AT2G20250,AT2G31880,AT2G36000,AT2G41835,AT2G43030,AT2G44990,AT3G02840,AT3G04060,AT3G08760,AT3G13430,AT3G18960,AT3G55950,AT4G11220,AT4G12070,AT4G15490,AT4G15510,AT4G18670,AT4G27430,AT4G27652,AT4G28050,AT4G31850,AT4G32020,AT4G39890,AT5G04720,AT5G13630,AT5G18970,AT5G21940,AT5G23850,AT5G25280,AT1G03495,AT1G05575…
MA1338.1	AREB3	Basic leucine zipper factors (bZIP)	-1000 bp to TSS	192	1727	0.000622283	0.293095	0.0236427	0.0035114	AT1G01500,AT1G11210,AT1G14290,AT1G60950,AT1G61800,AT1G63840,AT1G65820,AT1G67920,AT1G71040,AT1G77640,AT2G19710,AT2G31880,AT2G39710,AT2G41170,AT2G44578,AT2G47450,AT3G11640,AT3G46530,AT3G46730,AT3G55320,AT3G59940,AT4G00355,AT4G15270,AT4G15490,AT4G15510,AT4G24570,AT4G34730,AT5G05190,AT5G15260,AT5G22350,AT5G23850,AT5G27420,AT5G47220,AT5G55560,AT5G58650,AT5G60790,AT5G63180,AT5G64040,AT1G06360,AT1G26570…
MA1359.1	bHLH31	Basic helix-loop-helix factors (bHLH)	-1000 bp to TSS	160	1727	0.000626237	0.294958	0.0236427	0.0035114	AT1G01500,AT1G10140,AT1G11210,AT1G56460,AT1G60950,AT1G77640,AT2G19710,AT2G31880,AT2G39710,AT2G41170,AT2G44578,AT2G47450,AT3G05200,AT3G13430,AT3G26510,AT3G59940,AT4G00355,AT4G00400,AT4G15270,AT4G24570,AT5G04890,AT5G05190,AT5G08790,AT5G21940,AT5G23850,AT5G27420,AT5G47220,AT5G58650,AT5G63180,AT1G06360,AT1G09560,AT1G32350,AT1G35140,AT1G47655,AT1G51400,AT1G55110,AT1G55265,AT1G55370,AT2G05790,AT2G32830…
MA1249.1	RAP210	AP2/ERF domain	-1000 bp to TSS	213	1727	0.000873658	0.411493	0.0325957	0.00484109	AT1G10140,AT1G11210,AT1G18570,AT1G53910,AT1G67920,AT1G76870,AT2G04780,AT2G17290,AT2G40150,AT2G40270,AT3G03820,AT3G08760,AT3G13700,AT3G16510,AT3G24929,AT3G47800,AT3G51230,AT3G55470,AT3G57750,AT3G59940,AT3G63310,AT3G63410,AT4G11850,AT4G12070,AT4G14870,AT4G15490,AT4G18670,AT4G24570,AT4G35310,AT4G39050,AT5G04930,AT5G23850,AT5G38300,AT5G58650,AT5G60790,AT5G62280,AT5G62740,AT5G64940,AT5G65200,AT5G65220…
MA0582.1	RAV1	AP2/ERF domain	-1000 bp to TSS	199	1727	0.00115862	0.545711	0.042725	0.00634548	AT1G10140,AT1G23880,AT1G25500,AT1G27290,AT1G35680,AT1G61800,AT1G64150,AT1G71040,AT1G74790,AT1G76955,AT2G01600,AT2G33255,AT2G38720,AT2G41410,AT3G11640,AT3G11840,AT3G13229,AT3G51730,AT3G51960,AT3G52960,AT3G55890,AT3G59940,AT3G59970,AT4G00400,AT4G03260,AT4G13670,AT4G17670,AT4G27430,AT4G28660,AT4G34881,AT4G35310,AT4G35600,AT4G39890,AT5G04930,AT5G08790,AT5G09995,AT5G13820,AT5G15260,AT5G24990,AT5G27420…
MA0986.1	DREB2C	AP2/ERF domain	-1000 bp to TSS	202	1727	0.00131585	0.619767	0.0479652	0.00712376	AT1G06190,AT1G07530,AT1G11210,AT1G25370,AT1G33290,AT1G35420,AT1G48480,AT1G56010,AT1G73130,AT2G01600,AT2G04780,AT2G17290,AT2G36000,AT2G40150,AT3G10490,AT3G13229,AT3G16510,AT3G51230,AT3G55950,AT3G59940,AT3G63410,AT4G11220,AT4G15490,AT4G18580,AT4G18670,AT4G22490,AT4G25390,AT4G35310,AT5G04930,AT5G13820,AT5G24990,AT5G38300,AT5G46080,AT5G60790,AT5G61210,AT5G62280,AT5G65200,AT1G04680,AT1G08280,AT1G15830…
MA0551.1	HY5	Basic leucine zipper factors (bZIP)	-1000 bp to TSS	228	1727	0.0017587	0.828346	0.0633792	0.00941302	AT1G01500,AT1G07630,AT1G10150,AT1G11210,AT1G14290,AT1G30520,AT1G56460,AT1G60950,AT1G61800,AT1G66050,AT1G69640,AT1G71040,AT1G77640,AT2G17290,AT2G31880,AT2G39710,AT2G41170,AT2G44578,AT2G47450,AT3G08760,AT3G11640,AT3G46530,AT3G46730,AT3G52960,AT3G59940,AT4G00355,AT4G13510,AT4G15270,AT4G17810,AT4G28050,AT4G35310,AT4G39050,AT5G04890,AT5G05190,AT5G08790,AT5G14790,AT5G21940,AT5G23850,AT5G24990,AT5G27420…
MA0970.1	CMTA3	CG-1 domain	-1000 bp to TSS	205	1727	0.00191562	0.902256	0.0682585	0.0101377	AT1G12940,AT1G25370,AT1G35420,AT1G48480,AT1G53290,AT1G64950,AT1G71040,AT1G75120,AT1G78180,AT2G01600,AT2G04780,AT2G11520,AT2G36050,AT2G39710,AT2G41410,AT2G42870,AT2G43030,AT2G44578,AT3G02840,AT3G05200,AT3G13229,AT3G13700,AT3G46730,AT3G47820,AT3G52890,AT3G55950,AT3G59940,AT4G00355,AT4G08900,AT4G13510,AT4G17250,AT4G24570,AT4G26120,AT4G27652,AT4G34881,AT5G23850,AT5G27420,AT5G27930,AT5G42070,AT5G65200…
MA1223.1	AT3G60490	AP2/ERF domain	-1000 bp to TSS	210	1727	0.00311286	1	0.109687	0.0162906	AT1G10140,AT1G18570,AT1G25370,AT1G33290,AT1G35420,AT1G48480,AT1G53910,AT1G56010,AT1G67920,AT2G04780,AT2G17290,AT2G40150,AT2G40270,AT2G42210,AT3G03820,AT3G13229,AT3G13700,AT3G16510,AT3G26510,AT3G51230,AT3G55950,AT3G57750,AT3G59940,AT3G63310,AT3G63410,AT4G11850,AT4G12070,AT4G15490,AT4G18670,AT4G24570,AT4G27430,AT4G28050,AT4G35310,AT4G39050,AT5G04930,AT5G23850,AT5G38300,AT5G46080,AT5G60790,AT5G62280…
MA0968.1	bZIP68_MA0968.1	Basic leucine zipper factors (bZIP)	-1000 bp to TSS	179	1727	0.00321352	1	0.11199	0.0166326	AT1G01500,AT1G11210,AT1G13520,AT1G56460,AT1G60950,AT1G71040,AT1G77640,AT2G17290,AT2G31880,AT2G39710,AT2G41170,AT2G44578,AT2G47450,AT3G29631,AT3G46530,AT3G46730,AT3G59940,AT4G15270,AT4G17810,AT4G24570,AT4G35310,AT5G04890,AT5G21940,AT5G22350,AT5G23850,AT5G24990,AT5G40950,AT5G47220,AT5G55560,AT5G58650,AT5G62620,AT5G63180,AT1G12460,AT1G23870,AT1G35140,AT1G44770,AT1G47655,AT1G51400,AT1G55265,AT1G55370…
MA1337.1	bZIP44	Basic leucine zipper factors (bZIP)	-1000 bp to TSS	198	1727	0.00386785	1	0.133328	0.0198017	AT1G18570,AT1G22280,AT1G53290,AT1G61170,AT1G63110,AT1G63840,AT1G65820,AT1G67920,AT1G69490,AT1G71040,AT1G73130,AT1G74470,AT1G75120,AT1G76870,AT1G78420,AT2G17500,AT2G19710,AT2G41170,AT2G47450,AT3G13360,AT3G26510,AT3G29631,AT3G45850,AT3G46730,AT3G47820,AT3G51230,AT3G52890,AT3G59970,AT3G63410,AT4G15270,AT4G15490,AT4G15510,AT4G17300,AT4G24570,AT4G34730,AT4G34881,AT5G13630,AT5G18970,AT5G46080,AT5G47220…
MA1349.1	bZIP16	Basic leucine zipper factors (bZIP)	-1000 bp to TSS	196	1727	0.00463995	1	0.158223	0.0234991	AT1G01500,AT1G11210,AT1G60950,AT1G61800,AT1G63840,AT1G65820,AT1G67920,AT1G71040,AT1G72930,AT2G31880,AT2G39710,AT2G41170,AT2G44578,AT2G47450,AT3G46530,AT3G46730,AT3G49470,AT3G59940,AT4G00355,AT4G15270,AT4G15490,AT4G24570,AT4G34730,AT5G05190,AT5G15260,AT5G22350,AT5G23850,AT5G24990,AT5G27420,AT5G47220,AT5G58650,AT5G60790,AT5G62410,AT5G63180,AT5G64040,AT1G06360,AT1G26570,AT1G35140,AT1G44575,AT1G47655…
MA1360.1	bHLH74	Basic helix-loop-helix factors (bHLH)	-1000 bp to TSS	174	1727	0.00471021	1	0.15891	0.0236011	AT1G01500,AT1G07630,AT1G10140,AT1G11210,AT1G15910,AT1G23880,AT1G60950,AT1G77640,AT2G19710,AT2G39710,AT2G41170,AT2G44578,AT3G02840,AT3G05200,AT3G23880,AT3G26510,AT3G52890,AT3G59940,AT3G63410,AT4G00355,AT4G00400,AT4G15270,AT4G24570,AT4G39140,AT5G04890,AT5G08790,AT5G13630,AT5G21940,AT5G22350,AT5G23850,AT5G27420,AT5G58650,AT5G63180,AT1G06360,AT1G09560,AT1G12460,AT1G13260,AT1G35140,AT1G47655,AT1G51400…
MA0969.1	CMTA2	CG-1 domain	-1000 bp to TSS	194	1727	0.00537543	1	0.178061	0.0264454	AT1G12940,AT1G25370,AT1G48480,AT1G53290,AT1G64950,AT1G71040,AT1G78180,AT2G01600,AT2G04780,AT2G18700,AT2G36050,AT2G42870,AT2G43030,AT3G02840,AT3G05200,AT3G13229,AT3G13700,AT3G47820,AT3G55950,AT3G59940,AT4G24570,AT4G26120,AT4G27652,AT4G34881,AT5G23850,AT5G27420,AT5G27930,AT5G42070,AT5G54470,AT5G63780,AT5G65200,AT1G04680,AT1G07900,AT1G13260,AT1G14370,AT1G15570,AT1G35140,AT1G50570,AT1G52340,AT1G56280…
MA0561.1	PIF4	Basic helix-loop-helix factors (bHLH)	-1000 bp to TSS	150	1727	0.00543996	1	0.178061	0.0264454	AT1G01500,AT1G10140,AT1G11210,AT1G33050,AT1G56460,AT1G60950,AT1G69640,AT1G77640,AT2G31880,AT2G39710,AT2G41170,AT2G44578,AT2G47450,AT3G59940,AT4G15270,AT5G04890,AT5G05190,AT5G14790,AT5G21940,AT5G22350,AT5G23850,AT5G27420,AT5G47220,AT5G58650,AT5G63180,AT1G09560,AT1G12460,AT1G25450,AT1G35140,AT1G47655,AT1G51400,AT1G55265,AT1G55370,AT2G05790,AT2G32830,AT2G35500,AT2G38340,AT2G39190,AT3G07568,AT3G18560…
MA1011.1	PHYPADRAFT_72483	Basic helix-loop-helix factors (bHLH)	-1000 bp to TSS	168	1727	0.0054463	1	0.178061	0.0264454	AT1G01500,AT1G10140,AT1G11210,AT1G15910,AT1G56460,AT1G60950,AT1G64950,AT1G77920,AT2G19710,AT2G31880,AT2G36050,AT2G38720,AT2G39710,AT2G41170,AT2G44578,AT2G47450,AT3G02840,AT3G05200,AT3G47820,AT3G59940,AT4G00400,AT4G15270,AT4G24570,AT5G04890,AT5G08790,AT5G23850,AT5G27420,AT5G58650,AT5G63180,AT1G06360,AT1G09560,AT1G25450,AT1G35140,AT1G47655,AT1G51400,AT1G55110,AT1G55265,AT1G55370,AT1G80610,AT2G05790…
MA1173.1	MYB101	Helix-Turn-Helix	-1000 bp to TSS	166	1727	0.00564938	1	0.182815	0.0271516	AT1G05060,AT1G07530,AT1G12940,AT1G12990,AT1G21910,AT1G35420,AT1G60600,AT1G64150,AT1G74790,AT1G77920,AT2G04780,AT2G41410,AT2G42870,AT2G43030,AT3G02840,AT3G09830,AT3G11840,AT3G13229,AT3G16510,AT3G52960,AT3G57680,AT3G59940,AT4G15510,AT4G17670,AT4G18670,AT4G34730,AT4G35190,AT4G35600,AT5G16390,AT5G24990,AT5G25280,AT5G65200,AT1G02610,AT1G02850,AT1G03495,AT1G03940,AT1G04250,AT1G07570,AT1G12450,AT1G14370…
MA0034.1	Gam1	Tryptophan cluster factors	-1000 bp to TSS	217	1727	0.00605564	1	0.193983	0.0288102	AT1G13520,AT1G23040,AT1G30520,AT1G35420,AT1G48480,AT1G56010,AT1G64950,AT1G67920,AT1G78420,AT2G02170,AT2G30440,AT2G31880,AT2G41410,AT2G41835,AT2G43030,AT3G04420,AT3G08760,AT3G09830,AT3G16510,AT3G51230,AT3G52960,AT3G59940,AT3G61180,AT3G63310,AT4G00400,AT4G13510,AT4G15270,AT4G25390,AT4G27652,AT5G04720,AT5G11310,AT5G13820,AT5G21940,AT5G22270,AT5G27420,AT5G42070,AT5G46080,AT5G62280,AT5G63180,AT1G08540…
MA1007.1	PHYPADRAFT_173530	AP2/ERF domain	-1000 bp to TSS	177	1727	0.0067454	1	0.213917	0.0317708	AT1G18570,AT1G25370,AT1G33290,AT1G35420,AT1G63840,AT1G67920,AT1G78420,AT2G01600,AT2G02170,AT2G04780,AT2G17290,AT2G17787,AT2G21500,AT2G40150,AT2G40270,AT2G42870,AT3G08760,AT3G16510,AT3G20350,AT3G51230,AT3G57750,AT3G59940,AT3G63310,AT3G63410,AT4G00355,AT4G18580,AT4G18670,AT4G22490,AT4G27430,AT4G35310,AT4G39050,AT5G04930,AT5G13820,AT5G38300,AT5G46080,AT5G62280,AT5G63180,AT5G64940,AT1G04420,AT1G04680…
MA1364.1	PIF7	Basic helix-loop-helix factors (bHLH)	-1000 bp to TSS	150	1727	0.0071154	1	0.223364	0.0331738	AT1G01500,AT1G07630,AT1G11210,AT1G23880,AT1G56460,AT1G60950,AT2G01450,AT2G39710,AT2G44578,AT2G47450,AT3G55320,AT3G59940,AT4G00355,AT4G00400,AT4G15270,AT4G24570,AT5G04890,AT5G05190,AT5G08790,AT5G21940,AT5G22350,AT5G23850,AT5G27420,AT5G40950,AT5G58650,AT5G63180,AT1G06360,AT1G09560,AT1G12460,AT1G35140,AT1G47655,AT1G51400,AT1G55110,AT1G55265,AT1G55370,AT2G05790,AT2G32830,AT2G38340,AT2G39190,AT2G47190…
MA1033.1	OJ1058_F05.8	Basic leucine zipper factors (bZIP)	-1000 bp to TSS	178	1727	0.00718907	1	0.223364	0.0331738	AT1G01500,AT1G07630,AT1G56460,AT1G60950,AT1G64150,AT1G77640,AT2G01600,AT2G17290,AT2G31880,AT2G38720,AT2G39710,AT2G41170,AT2G44578,AT2G47450,AT3G05200,AT3G13229,AT3G26510,AT3G46730,AT3G51730,AT3G53580,AT3G59940,AT4G00355,AT4G08900,AT4G35310,AT5G04890,AT5G05190,AT5G13630,AT5G21940,AT5G22830,AT5G23850,AT5G27420,AT5G47220,AT5G58650,AT5G62280,AT5G63180,AT1G09560,AT1G23870,AT1G35140,AT1G47655,AT1G51400…
MA1047.1	TGA5	Basic leucine zipper factors (bZIP)	-1000 bp to TSS	168	1727	0.00725457	1	0.223364	0.0331738	AT1G11210,AT1G18570,AT1G30400,AT1G31130,AT1G33040,AT1G63840,AT1G69490,AT1G71040,AT1G73130,AT1G76870,AT1G77640,AT2G34660,AT2G41170,AT3G04420,AT3G11640,AT3G13229,AT3G16510,AT3G26510,AT3G26710,AT3G47800,AT3G53580,AT4G15270,AT4G15490,AT4G15510,AT4G24570,AT4G27430,AT4G27652,AT4G34730,AT4G34881,AT4G39140,AT5G04890,AT5G13630,AT5G47220,AT5G58650,AT5G60790,AT5G64040,AT1G04680,AT1G06360,AT1G07820,AT1G13260…
MA1177.1	MYB65	Helix-Turn-Helix	-1000 bp to TSS	206	1727	0.00782684	1	0.238666	0.0354466	AT1G11210,AT1G12940,AT1G14290,AT1G35420,AT1G48480,AT1G60600,AT1G63110,AT1G65820,AT1G76870,AT2G20250,AT2G30250,AT2G30440,AT2G40270,AT2G41410,AT2G43030,AT3G04420,AT3G05200,AT3G08860,AT3G09830,AT3G11820,AT3G16510,AT3G26510,AT3G47800,AT3G52960,AT3G59940,AT4G04350,AT4G13670,AT4G17300,AT4G17670,AT4G18670,AT4G22490,AT4G24570,AT5G13820,AT5G24990,AT5G46080,AT5G47220,AT5G62280,AT5G62740,AT5G65200,AT5G65220…
MA1409.1	OsRR22	Other	-1000 bp to TSS	180	1727	0.00905248	1	0.273411	0.0406068	AT1G05060,AT1G11210,AT1G61170,AT1G64950,AT1G66050,AT1G69310,AT1G72930,AT1G76955,AT2G04780,AT2G37660,AT2G41170,AT2G44578,AT3G05200,AT3G11640,AT3G16510,AT3G23880,AT3G26510,AT3G47820,AT3G51960,AT3G52960,AT3G63410,AT4G12070,AT4G15270,AT4G32020,AT5G10780,AT5G27930,AT5G38300,AT5G55560,AT5G63180,AT1G03495,AT1G06780,AT1G35140,AT1G44770,AT1G75350,AT2G02500,AT2G15280,AT2G22670,AT2G35930,AT2G44480,AT3G01480…
MA0053.1	MNB1A	C2H2 zinc finger factors	-1000 bp to TSS	1313	1727	0.00965813	1	0.288952	0.0429149	AT1G01355,AT1G01500,AT1G02660,AT1G05060,AT1G06190,AT1G07530,AT1G07630,AT1G08620,AT1G10120,AT1G10150,AT1G12940,AT1G12990,AT1G13520,AT1G14290,AT1G15910,AT1G17550,AT1G18390,AT1G21450,AT1G21910,AT1G22280,AT1G22800,AT1G23040,AT1G23880,AT1G25370,AT1G25500,AT1G27290,AT1G30400,AT1G30520,AT1G31130,AT1G33040,AT1G33050,AT1G33290,AT1G34260,AT1G35420,AT1G35680,AT1G48480,AT1G52670,AT1G53290,AT1G53300,AT1G53910…
MA1335.1	TGA4	Basic leucine zipper factors (bZIP)	-1000 bp to TSS	204	1727	0.0102017	1	0.302361	0.0449064	AT1G11210,AT1G31130,AT1G53290,AT1G63840,AT1G69490,AT1G73130,AT1G76870,AT1G77640,AT2G01600,AT2G17500,AT2G33255,AT2G41170,AT2G41410,AT2G44578,AT2G44990,AT2G46680,AT2G47450,AT3G04420,AT3G11640,AT3G11820,AT3G16510,AT3G26510,AT3G26710,AT3G49680,AT3G51230,AT3G52890,AT3G57750,AT3G59940,AT3G63310,AT4G01480,AT4G15270,AT4G15490,AT4G23940,AT4G24450,AT4G24570,AT4G27652,AT4G34730,AT4G39140,AT5G01015,AT5G06960…
MA1346.1	TGA10	Basic leucine zipper factors (bZIP)	-1000 bp to TSS	167	1727	0.0107872	1	0.314526	0.0467131	AT1G11210,AT1G21910,AT1G31130,AT1G33040,AT1G63840,AT1G66050,AT1G69490,AT1G71040,AT1G73130,AT1G77640,AT2G41170,AT2G41410,AT2G47450,AT3G04420,AT3G08860,AT3G11640,AT3G16510,AT3G26510,AT3G26710,AT3G49680,AT3G51230,AT3G52890,AT4G01480,AT4G15270,AT4G15490,AT4G24570,AT4G27652,AT4G39140,AT4G39890,AT5G01015,AT5G11310,AT5G47220,AT5G58650,AT5G60790,AT5G62410,AT5G63780,AT5G64040,AT5G64940,AT1G06780,AT1G13260…
MA1382.1	FAR1	Zinc-coordinating	-1000 bp to TSS	204	1727	0.0108105	1	0.314526	0.0467131	AT1G01500,AT1G10140,AT1G12940,AT1G18570,AT1G35420,AT1G60950,AT1G71790,AT2G36050,AT2G42870,AT3G02840,AT3G05200,AT3G13700,AT3G46730,AT3G47820,AT3G49470,AT4G00355,AT4G08900,AT4G13510,AT4G24570,AT4G28390,AT5G06960,AT5G21940,AT5G23850,AT5G27420,AT5G42070,AT5G54470,AT5G55560,AT5G58650,AT5G63780,AT5G65200,AT1G03495,AT1G09560,AT1G13260,AT1G16390,AT1G25450,AT1G35140,AT1G50570,AT1G64780,AT1G68690,AT1G79380…
MA1008.1	PHYPADRAFT_182268	AP2/ERF domain	-1000 bp to TSS	208	1727	0.0111265	1	0.320779	0.0476418	AT1G01355,AT1G07530,AT1G10140,AT1G18570,AT1G25370,AT1G33290,AT1G53910,AT1G67920,AT2G01600,AT2G02170,AT2G04780,AT2G17290,AT2G21500,AT2G40150,AT2G40270,AT2G42870,AT3G03820,AT3G08760,AT3G16510,AT3G51230,AT3G55470,AT3G57750,AT3G59940,AT3G63410,AT4G00355,AT4G11850,AT4G15490,AT4G18580,AT4G18670,AT4G22490,AT4G27430,AT4G28050,AT4G35310,AT4G39050,AT5G04930,AT5G13820,AT5G23850,AT5G27420,AT5G38300,AT5G46080…
MA1165.1	AT1G49560	Other	-1000 bp to TSS	215	1727	0.0113679	1	0.322675	0.0479234	AT1G21450,AT1G33050,AT1G61800,AT1G66050,AT1G69310,AT1G78420,AT2G36000,AT2G36050,AT2G38720,AT2G40150,AT2G43030,AT3G02840,AT3G04930,AT3G08760,AT3G11820,AT3G13700,AT3G26510,AT3G51730,AT3G55950,AT3G63310,AT4G08900,AT4G11220,AT4G15270,AT4G15510,AT4G17600,AT4G17810,AT4G34881,AT4G39890,AT5G21940,AT5G24090,AT5G42070,AT5G62280,AT5G65200,AT1G06360,AT1G15830,AT1G27730,AT1G29340,AT1G33030,AT1G44575,AT1G49730…
MA1016.1	GATA15	Other C4 zinc finger-type factors	-1000 bp to TSS	205	1727	0.0113958	1	0.322675	0.0479234	AT1G10150,AT1G18390,AT1G21910,AT1G23040,AT1G25370,AT1G27290,AT1G48480,AT1G61170,AT2G11520,AT2G18700,AT2G30440,AT2G39710,AT2G44500,AT2G47450,AT3G02840,AT3G05200,AT3G13430,AT3G16510,AT3G18960,AT3G26510,AT3G46200,AT3G46730,AT3G47800,AT3G47820,AT3G51230,AT3G51730,AT3G57680,AT3G59940,AT4G13510,AT4G18670,AT4G28050,AT4G28660,AT4G32020,AT5G03990,AT5G13630,AT5G22350,AT5G27420,AT5G47220,AT5G52640,AT5G53860…
MA1048.1	ERF018	AP2/ERF domain	-1000 bp to TSS	212	1727	0.0117602	1	0.330045	0.049018	AT1G11210,AT1G15910,AT1G23880,AT1G25370,AT1G33290,AT1G35420,AT1G63840,AT1G66050,AT1G67920,AT1G71040,AT1G76870,AT1G78180,AT1G78420,AT2G02170,AT2G11520,AT2G17787,AT2G30440,AT2G37660,AT2G38540,AT2G41170,AT2G42870,AT2G47450,AT3G03820,AT3G08760,AT3G11820,AT3G13229,AT3G20350,AT3G57750,AT3G59970,AT4G00355,AT4G03320,AT4G13510,AT4G14870,AT4G15270,AT4G15490,AT4G15510,AT4G17300,AT4G22490,AT4G26120,AT4G27652…
MA1363.1	bHLH69	Basic helix-loop-helix factors (bHLH)	-1000 bp to TSS	185	1727	0.0145629	1	0.405119	0.0601679	AT1G01500,AT1G10140,AT1G11210,AT1G13520,AT1G15910,AT1G23880,AT1G75120,AT1G77640,AT1G77920,AT1G78260,AT2G19710,AT2G31880,AT2G39710,AT2G40150,AT2G41170,AT2G42210,AT2G44578,AT3G02840,AT3G05200,AT3G11820,AT3G46530,AT3G51730,AT3G55890,AT3G59090,AT3G59940,AT4G00355,AT4G00400,AT4G15270,AT4G24570,AT5G04890,AT5G05190,AT5G08790,AT5G22350,AT5G27420,AT5G47220,AT5G58650,AT5G63180,AT5G64940,AT1G09560,AT1G12460…
MA0931.1	ABI5	Basic leucine zipper factors (bZIP)	-1000 bp to TSS	137	1727	0.0172667	1	0.476156	0.0707183	AT1G01500,AT1G07630,AT1G11210,AT1G56460,AT1G60950,AT1G61800,AT1G77640,AT2G31880,AT2G39710,AT2G41170,AT2G44578,AT2G47450,AT3G59940,AT4G15270,AT4G35600,AT5G04890,AT5G05190,AT5G08790,AT5G21940,AT5G23850,AT5G24990,AT5G47220,AT5G58650,AT5G63180,AT1G06360,AT1G35140,AT1G44575,AT1G47655,AT1G51400,AT1G55265,AT1G55370,AT2G05790,AT2G32830,AT2G38340,AT2G39190,AT2G47190,AT3G09020,AT3G18560,AT3G21055,AT3G25510…
MA1088.1	WRKY48	WRKY	-1000 bp to TSS	187	1727	0.0174479	1	0.477004	0.0708443	AT1G08620,AT1G11210,AT1G13520,AT1G18570,AT1G33050,AT1G63840,AT1G67920,AT1G71040,AT1G74790,AT2G01600,AT2G36000,AT2G37660,AT2G39710,AT2G42870,AT3G04060,AT3G05200,AT3G09830,AT3G11640,AT3G11840,AT3G23880,AT3G26510,AT3G28580,AT3G45850,AT3G47820,AT3G53580,AT3G55320,AT4G15270,AT4G17250,AT4G28390,AT4G32020,AT4G35310,AT5G02040,AT5G21940,AT5G23850,AT5G25280,AT5G27420,AT5G45390,AT5G62150,AT1G05575,AT1G07900…
MA1069.1	TGA6	Basic leucine zipper factors (bZIP)	-1000 bp to TSS	151	1727	0.0177703	1	0.481667	0.0715368	AT1G10140,AT1G11210,AT1G30400,AT1G31130,AT1G33040,AT1G69490,AT1G71040,AT1G73130,AT1G77640,AT2G34660,AT2G41170,AT3G04420,AT3G11640,AT3G13229,AT3G16510,AT3G26510,AT3G26710,AT4G15270,AT4G24570,AT4G27430,AT4G27652,AT4G34730,AT4G39140,AT5G13630,AT5G47220,AT5G58650,AT5G60790,AT5G64040,AT1G04680,AT1G06360,AT1G07820,AT1G13260,AT1G35140,AT1G47655,AT1G48520,AT1G50570,AT1G66090,AT1G66190,AT1G69450,AT2G05790…
MA1350.1	bZIP42	Basic leucine zipper factors (bZIP)	-1000 bp to TSS	234	1727	0.0180455	1	0.484981	0.072029	AT1G11210,AT1G13520,AT1G30400,AT1G30970,AT1G56460,AT1G61170,AT1G63110,AT1G63840,AT1G65820,AT1G67920,AT1G69490,AT1G71040,AT1G73130,AT1G74470,AT1G76870,AT2G17500,AT2G19710,AT2G41170,AT2G41410,AT2G47450,AT3G02840,AT3G09830,AT3G13360,AT3G20350,AT3G26510,AT3G47820,AT3G51230,AT3G59970,AT3G63410,AT4G00355,AT4G15270,AT4G15490,AT4G15510,AT4G17300,AT4G24570,AT4G34730,AT4G35190,AT5G13630,AT5G15260,AT5G46080…
MA1224.1	CBF1	AP2/ERF domain	-1000 bp to TSS	196	1727	0.0182758	1	0.487043	0.0723353	AT1G10140,AT1G18570,AT1G25370,AT1G33290,AT1G53910,AT1G67920,AT1G77640,AT2G04780,AT2G36000,AT2G40150,AT3G03820,AT3G13700,AT3G16510,AT3G51230,AT3G55470,AT3G57750,AT3G59940,AT3G63310,AT3G63410,AT4G03320,AT4G11850,AT4G12070,AT4G15490,AT4G17300,AT4G18670,AT4G27430,AT4G28050,AT4G39050,AT5G04930,AT5G09995,AT5G14790,AT5G23850,AT5G38300,AT5G58650,AT5G62280,AT5G64940,AT1G04250,AT1G04420,AT1G04680,AT1G06780…
MA0964.1	BIM1	Basic helix-loop-helix factors (bHLH)	-1000 bp to TSS	139	1727	0.0193706	1	0.511918	0.0760296	AT1G01500,AT1G10140,AT1G11210,AT1G15910,AT1G56460,AT1G60950,AT2G19710,AT2G36050,AT2G39710,AT2G41170,AT2G44578,AT2G47450,AT3G02840,AT3G05200,AT3G59940,AT4G00400,AT4G15270,AT4G24570,AT5G04890,AT5G08790,AT5G21940,AT5G23850,AT5G27420,AT5G63180,AT1G06360,AT1G09560,AT1G25450,AT1G35140,AT1G55110,AT1G59590,AT2G32830,AT3G07568,AT3G18560,AT3G21055,AT3G25070,AT3G25510,AT3G53470,AT3G55910,AT3G63200,AT4G01000…
MA1372.1	STZ	C2H2 zinc finger factors	-1000 bp to TSS	223	1727	0.0199716	1	0.523439	0.0777407	AT1G01355,AT1G11210,AT1G13520,AT1G14290,AT1G25500,AT1G33050,AT1G53290,AT1G64950,AT1G72930,AT1G73130,AT2G21500,AT2G36050,AT2G38540,AT2G40150,AT2G42210,AT2G43030,AT3G03820,AT3G11640,AT3G11820,AT3G13229,AT3G16910,AT3G26510,AT3G47820,AT4G13670,AT4G17250,AT4G17300,AT4G24570,AT4G25390,AT5G01015,AT5G04930,AT5G05190,AT5G09995,AT5G13820,AT5G18970,AT5G52640,AT5G64940,AT1G03495,AT1G04420,AT1G09560,AT1G11303…
MA0947.1	ARR14	Tryptophan cluster factors	-1000 bp to TSS	220	1727	0.0205118	1	0.533191	0.0791891	AT1G02660,AT1G05060,AT1G07530,AT1G11210,AT1G61170,AT1G64950,AT1G66050,AT1G69310,AT1G72930,AT1G76955,AT1G78180,AT2G04780,AT2G20310,AT2G36000,AT2G36050,AT2G41170,AT2G44578,AT3G02840,AT3G04060,AT3G05200,AT3G05380,AT3G11640,AT3G13700,AT3G23880,AT3G28580,AT3G47820,AT3G55950,AT3G63410,AT4G15270,AT4G17250,AT4G32020,AT5G10780,AT5G18970,AT5G27930,AT5G38300,AT5G55560,AT5G63180,AT1G03495,AT1G04680,AT1G06780…
MA0575.1	F3A4.140	Tryptophan cluster factors	-1000 bp to TSS	197	1727	0.0221047	1	0.567348	0.0842621	AT1G10150,AT1G48480,AT1G66050,AT1G67920,AT1G75120,AT2G01600,AT2G30440,AT2G34660,AT2G37660,AT2G40270,AT2G41410,AT2G43030,AT3G04420,AT3G05200,AT3G08760,AT3G13700,AT3G16510,AT3G26510,AT3G51730,AT3G52960,AT3G57680,AT3G59940,AT3G61180,AT4G03320,AT4G04350,AT4G24450,AT4G24570,AT4G25390,AT4G27652,AT5G13820,AT5G25280,AT5G27420,AT5G42070,AT1G03550,AT1G26570,AT1G26840,AT1G27730,AT1G29440,AT1G32350,AT1G49730…
MA0946.1	ARR11	Tryptophan cluster factors	-1000 bp to TSS	170	1727	0.0221836	1	0.567348	0.0842621	AT1G07530,AT1G07630,AT1G11210,AT1G18570,AT1G53910,AT1G61170,AT1G64950,AT1G66050,AT1G69310,AT1G72930,AT1G78180,AT2G04780,AT2G36000,AT2G41170,AT3G02840,AT3G05200,AT3G13700,AT3G18960,AT3G26510,AT4G12070,AT4G15270,AT4G15490,AT4G17250,AT4G32020,AT5G10780,AT5G24990,AT5G25280,AT5G27930,AT5G38300,AT5G47220,AT5G55560,AT5G63180,AT1G04680,AT1G06780,AT1G35140,AT1G44770,AT2G22670,AT2G38340,AT2G41640,AT2G44480…
MA0549.1	BZR2	Unidentified class	-1000 bp to TSS	146	1727	0.0224161	1	0.568706	0.0844638	AT1G01500,AT1G11210,AT1G56460,AT1G60950,AT2G19710,AT2G31880,AT2G36050,AT2G39710,AT2G41170,AT2G44578,AT2G47450,AT3G59940,AT4G00355,AT4G24570,AT4G35600,AT5G02040,AT5G05190,AT5G21940,AT5G23850,AT5G27420,AT5G58650,AT5G63180,AT1G09560,AT1G13260,AT1G25450,AT1G35140,AT1G47655,AT1G51400,AT1G55110,AT1G55265,AT1G55370,AT2G05790,AT2G30150,AT2G32830,AT2G47190,AT3G03470,AT3G14620,AT3G18560,AT3G21055,AT3G25510…
MA1339.1	bZIP43	Basic leucine zipper factors (bZIP)	-1000 bp to TSS	214	1727	0.0229367	1	0.577296	0.0857396	AT1G01355,AT1G11210,AT1G22280,AT1G22800,AT1G56460,AT1G63840,AT1G65820,AT1G69490,AT1G73130,AT1G77640,AT1G78420,AT2G17500,AT2G19710,AT2G31880,AT2G41170,AT2G41410,AT2G47450,AT3G05200,AT3G13360,AT3G26510,AT3G29631,AT3G45850,AT3G46730,AT3G51230,AT3G63410,AT4G00355,AT4G15270,AT4G15490,AT4G17300,AT4G22360,AT4G24570,AT4G34730,AT5G13630,AT5G15260,AT5G46080,AT5G47220,AT5G62410,AT5G64040,AT1G03940,AT1G06360…
MA1285.1	At2g45680	Basic helix-loop-helix factors (bHLH)	-1000 bp to TSS	154	1727	0.0249798	1	0.623767	0.0926414	AT1G25500,AT1G30970,AT1G61170,AT1G69490,AT1G71040,AT1G75120,AT1G78180,AT2G17500,AT2G47450,AT3G04060,AT3G05360,AT3G08860,AT3G46730,AT3G46920,AT3G57680,AT3G63410,AT4G17900,AT4G18670,AT4G23940,AT4G24450,AT5G01630,AT5G13820,AT5G47220,AT5G60790,AT5G63180,AT5G66530,AT1G02460,AT1G05575,AT1G06360,AT1G06780,AT1G14370,AT1G25450,AT1G27730,AT1G35140,AT1G48950,AT1G49380,AT1G64780,AT2G36220,AT3G06770,AT3G10500…
MA1345.1	bZIP48	Basic leucine zipper factors (bZIP)	-1000 bp to TSS	213	1727	0.0297153	1	0.736221	0.109343	AT1G01355,AT1G11210,AT1G18570,AT1G22280,AT1G52670,AT1G53290,AT1G61170,AT1G63110,AT1G63840,AT1G65820,AT1G67920,AT1G69490,AT1G71040,AT1G73130,AT1G74470,AT1G75120,AT1G76870,AT1G78420,AT2G17500,AT2G19710,AT2G40150,AT2G41170,AT2G41410,AT2G47450,AT3G02840,AT3G13360,AT3G26510,AT3G29631,AT3G45850,AT3G46730,AT3G51230,AT3G63410,AT4G15270,AT4G15490,AT4G17300,AT4G24570,AT4G34730,AT4G34881,AT5G13630,AT5G46080…
MA1083.1	WRKY30	WRKY	-1000 bp to TSS	200	1727	0.0307115	1	0.755004	0.112133	AT1G08620,AT1G11210,AT1G18570,AT1G35420,AT1G60600,AT1G63840,AT1G67920,AT1G71040,AT2G17290,AT2G20310,AT2G33255,AT2G36000,AT2G36050,AT2G39710,AT2G40150,AT3G04060,AT3G05200,AT3G05360,AT3G08860,AT3G11640,AT3G11840,AT3G16510,AT3G23880,AT3G26510,AT3G45850,AT3G52960,AT3G55320,AT4G15270,AT4G17250,AT4G18670,AT4G24570,AT4G28390,AT4G32020,AT4G35600,AT5G02040,AT5G21940,AT5G23850,AT5G25280,AT5G27420,AT5G40950…
MA1307.1	WRKY31	WRKY	-1000 bp to TSS	151	1727	0.0318168	1	0.776161	0.115275	AT1G08620,AT1G11210,AT1G18570,AT1G60600,AT1G63840,AT1G71040,AT2G36000,AT2G36050,AT2G39710,AT2G40150,AT2G43030,AT2G44500,AT3G08760,AT3G11640,AT3G11840,AT3G16510,AT3G45850,AT4G00400,AT4G03260,AT4G15270,AT4G28050,AT4G35600,AT5G13630,AT5G21940,AT5G23850,AT5G24090,AT5G25280,AT5G45390,AT5G62150,AT1G05575,AT1G27730,AT1G35140,AT1G48520,AT1G55265,AT1G55730,AT1G64780,AT1G79380,AT1G80080,AT1G80610,AT2G15390…
MA0949.1	ARR2	Tryptophan cluster factors	-1000 bp to TSS	212	1727	0.0323694	1	0.783613	0.116382	AT1G07530,AT1G07630,AT1G11210,AT1G18570,AT1G52670,AT1G66050,AT1G69310,AT1G72930,AT1G74790,AT1G78180,AT2G04780,AT2G41170,AT2G47450,AT3G02840,AT3G04060,AT3G05200,AT3G11640,AT3G13430,AT3G13700,AT3G18960,AT3G23880,AT3G55950,AT3G63410,AT4G12070,AT4G15270,AT4G15490,AT4G27430,AT4G32020,AT5G01630,AT5G02040,AT5G24990,AT5G25280,AT5G27930,AT5G63180,AT1G03495,AT1G09480,AT1G27730,AT1G33030,AT1G35140,AT1G47210…
MA0129.1	TGA1A	Basic leucine zipper factors (bZIP)	-1000 bp to TSS	150	1727	0.0331827	1	0.797217	0.118402	AT1G11210,AT1G17550,AT1G18570,AT1G31130,AT1G35420,AT1G63840,AT1G71040,AT1G76870,AT2G31880,AT2G41170,AT2G41410,AT3G04420,AT3G26510,AT3G47800,AT3G53580,AT4G15270,AT4G15490,AT4G15510,AT4G17300,AT4G24570,AT4G28390,AT4G34730,AT4G34881,AT4G39140,AT5G02040,AT5G04890,AT5G13630,AT5G47220,AT5G58650,AT5G64040,AT1G04680,AT1G05575,AT1G06360,AT1G07820,AT1G08540,AT1G09480,AT1G12450,AT1G13260,AT1G35140,AT1G44575…
MA1070.1	TGA7	Basic leucine zipper factors (bZIP)	-1000 bp to TSS	188	1727	0.0341405	1	0.81406	0.120904	AT1G11210,AT1G30400,AT1G31130,AT1G69490,AT1G71040,AT1G73130,AT1G77640,AT2G19710,AT2G34660,AT2G41170,AT2G41410,AT2G44740,AT2G44990,AT3G04420,AT3G08860,AT3G11640,AT3G13229,AT3G16510,AT3G23880,AT3G26710,AT3G61180,AT4G13510,AT4G15270,AT4G15490,AT4G27430,AT4G27652,AT4G34730,AT4G39140,AT5G01015,AT5G04890,AT5G04930,AT5G05190,AT5G21940,AT5G47220,AT5G58650,AT5G60790,AT5G64040,AT1G03495,AT1G03940,AT1G04680…
MA1417.1	O2	Basic leucine zipper factors (bZIP)	-1000 bp to TSS	190	1727	0.0351417	1	0.83168	0.123521	AT1G11210,AT1G12940,AT1G22280,AT1G30970,AT1G52670,AT1G53290,AT1G63840,AT1G65820,AT1G71040,AT1G72930,AT1G73130,AT1G74470,AT1G78420,AT2G19710,AT2G41170,AT3G13229,AT3G13360,AT3G26510,AT3G45850,AT3G46530,AT3G46730,AT3G52890,AT3G63410,AT4G01480,AT4G13510,AT4G15270,AT4G15490,AT4G17250,AT4G17300,AT4G17810,AT4G24570,AT4G34730,AT5G16390,AT5G18970,AT5G47220,AT5G52640,AT5G60790,AT5G62410,AT5G64040,AT1G06360…
MA1310.1	WRKY42	WRKY	-1000 bp to TSS	174	1727	0.0361586	1	0.849407	0.126153	AT1G08620,AT1G11210,AT1G18570,AT1G35680,AT1G60600,AT1G63840,AT1G71040,AT2G11520,AT2G36000,AT2G36050,AT2G39710,AT2G40150,AT2G44500,AT3G04420,AT3G05200,AT3G08760,AT3G11840,AT3G16510,AT3G45850,AT4G03260,AT4G15270,AT4G24570,AT4G35600,AT5G21940,AT5G23850,AT5G24090,AT5G25280,AT5G45390,AT5G47220,AT5G62150,AT1G05575,AT1G06780,AT1G08540,AT1G09645,AT1G24610,AT1G27730,AT1G35140,AT1G52340,AT1G55265,AT1G55730…
MA1178.1	MYB3R1	Helix-Turn-Helix	-1000 bp to TSS	185	1727	0.0380477	1	0.887214	0.131768	AT1G01355,AT1G07630,AT1G13520,AT1G18570,AT1G21450,AT1G30400,AT1G30970,AT1G33290,AT1G35420,AT1G61170,AT1G63110,AT1G63840,AT1G64355,AT1G67920,AT1G69490,AT1G71040,AT1G77640,AT2G01600,AT2G02170,AT2G02710,AT2G19710,AT2G28150,AT2G30440,AT2G41410,AT2G44990,AT3G04930,AT3G05360,AT3G16910,AT3G26510,AT3G63410,AT4G00400,AT4G08900,AT4G17250,AT4G17600,AT4G22490,AT4G32020,AT5G04720,AT5G25280,AT5G46080,AT5G54470…
MA1297.1	WRKY26	WRKY	-1000 bp to TSS	194	1727	0.0386735	1	0.895222	0.132958	AT1G01500,AT1G06190,AT1G08620,AT1G11210,AT1G18570,AT1G21910,AT1G30400,AT1G35680,AT1G53300,AT1G60600,AT1G74790,AT2G11520,AT2G33255,AT2G36000,AT2G36050,AT2G40150,AT2G43030,AT2G44500,AT3G04420,AT3G05380,AT3G11840,AT3G16510,AT3G45850,AT3G52960,AT4G08900,AT4G17810,AT4G28390,AT4G35600,AT5G02040,AT5G21940,AT5G22520,AT5G23850,AT5G24090,AT5G25280,AT5G45390,AT5G47220,AT5G62150,AT5G64630,AT1G05575,AT1G06780…
MA0956.1	BEE2	Basic helix-loop-helix factors (bHLH)	-1000 bp to TSS	149	1727	0.0393281	1	0.903778	0.134228	AT1G01500,AT1G10140,AT1G11210,AT1G15910,AT1G56460,AT1G60950,AT1G77920,AT2G19710,AT2G31880,AT2G39710,AT2G41170,AT2G44578,AT2G47450,AT3G05200,AT3G59940,AT4G15270,AT4G24570,AT5G04890,AT5G05190,AT5G08790,AT5G21940,AT5G22350,AT5G23850,AT5G27420,AT5G58650,AT5G63180,AT1G06360,AT1G09560,AT1G12460,AT1G25450,AT1G35140,AT1G47655,AT1G51400,AT1G55110,AT1G55265,AT1G55370,AT2G05790,AT2G32830,AT2G38340,AT2G39190…
MA0096.1	bZIP910	Basic leucine zipper factors (bZIP)	-1000 bp to TSS	138	1727	0.0426995	1	0.974196	0.144687	AT1G01355,AT1G11210,AT1G18570,AT1G23880,AT1G31130,AT1G64950,AT1G69490,AT1G73130,AT2G30250,AT2G31880,AT3G11640,AT3G26510,AT3G26710,AT4G15490,AT4G18580,AT4G24570,AT4G27652,AT4G28050,AT5G13630,AT5G47220,AT5G58650,AT5G62410,AT5G64040,AT5G65600,AT1G06360,AT1G07820,AT1G12290,AT1G12450,AT1G35140,AT1G48520,AT1G50570,AT1G63350,AT1G66090,AT2G05790,AT2G15390,AT2G21530,AT2G30150,AT2G34620,AT2G36220,AT3G15518…
MA1039.1	MYB4	Tryptophan cluster factors	-1000 bp to TSS	185	1727	0.043609	1	0.987839	0.146713	AT1G10120,AT1G15910,AT1G18570,AT1G31130,AT1G35680,AT1G48480,AT1G52670,AT1G60950,AT1G67920,AT1G68190,AT1G71040,AT2G33255,AT2G36050,AT2G47450,AT3G04420,AT3G13700,AT3G16910,AT3G29631,AT3G55270,AT4G13510,AT4G18670,AT4G27430,AT5G04890,AT5G10780,AT5G16390,AT5G42070,AT5G47220,AT5G49530,AT5G60790,AT5G65220,AT5G65600,AT1G02850,AT1G04680,AT1G14370,AT1G27730,AT1G43700,AT1G49730,AT1G59560,AT1G64780,AT1G66430…
MA1392.1	MYB98	Helix-Turn-Helix	-1000 bp to TSS	161	1727	0.0446232	1	1	0.14906	AT1G01500,AT1G12990,AT1G18570,AT1G25370,AT1G30970,AT1G60600,AT1G61170,AT1G69490,AT1G71040,AT1G72640,AT2G01600,AT2G17500,AT2G30440,AT2G40270,AT2G41410,AT2G44990,AT3G08760,AT3G08860,AT3G23880,AT3G47800,AT3G52960,AT4G00400,AT4G13500,AT4G13670,AT4G18670,AT5G25280,AT5G58650,AT1G04680,AT1G06360,AT1G13260,AT1G14190,AT1G23750,AT1G28600,AT1G31690,AT1G35140,AT1G47655,AT1G48520,AT1G58235,AT2G17705,AT2G38470…
MA1192.1	At5g58900	Helix-Turn-Helix	-1000 bp to TSS	182	1727	0.0455078	1	1	0.150945	AT1G23880,AT1G33040,AT1G60600,AT1G68520,AT1G72640,AT1G76870,AT1G76955,AT1G78420,AT2G02710,AT2G17500,AT2G17787,AT2G36050,AT2G38720,AT2G41410,AT2G43030,AT2G44740,AT3G08860,AT3G26510,AT3G28580,AT3G29631,AT3G51230,AT3G59090,AT4G00355,AT4G08900,AT4G13500,AT4G14870,AT4G28660,AT5G04720,AT5G04890,AT5G61640,AT5G64040,AT5G64940,AT5G65200,AT1G23750,AT1G23870,AT1G26570,AT1G49730,AT1G50732,AT1G51400,AT1G55370…
MA1170.1	MYB118	Helix-Turn-Helix	-1000 bp to TSS	170	1727	0.0463416	1	1	0.152636	AT1G10150,AT1G14290,AT1G30970,AT1G33290,AT1G35420,AT1G60600,AT1G69490,AT2G01600,AT2G28150,AT2G40270,AT2G41410,AT2G44990,AT3G03820,AT3G04420,AT3G08760,AT3G20350,AT3G23880,AT3G26510,AT3G47800,AT3G52960,AT4G00400,AT4G13670,AT4G18670,AT4G32020,AT5G25280,AT5G58650,AT1G04680,AT1G06360,AT1G06780,AT1G13260,AT1G20980,AT1G23750,AT1G29910,AT1G30475,AT1G35140,AT1G48520,AT1G58235,AT1G77500,AT2G05790,AT2G17705…
MA1186.1	At1g49010	Helix-Turn-Helix	-1000 bp to TSS	215	1727	0.0469708	1	1	0.153634	AT1G01500,AT1G10150,AT1G17550,AT1G33040,AT1G35420,AT1G56460,AT1G63840,AT1G64950,AT1G68190,AT1G68520,AT1G72640,AT1G76870,AT1G76955,AT2G02710,AT2G18700,AT2G27720,AT2G36050,AT2G38540,AT2G38720,AT2G41410,AT2G42870,AT2G43030,AT3G02840,AT3G05360,AT3G08860,AT3G13430,AT3G13700,AT3G18960,AT3G26510,AT3G28580,AT3G29631,AT3G46920,AT4G00355,AT4G08900,AT4G13500,AT4G13670,AT4G14870,AT4G17900,AT4G25390,AT4G26120…
MA1180.1	MYB3R4	Helix-Turn-Helix	-1000 bp to TSS	180	1727	0.0490782	1	1	0.15942	AT1G01355,AT1G06190,AT1G07630,AT1G13520,AT1G18570,AT1G21450,AT1G30970,AT1G33290,AT1G35420,AT1G56010,AT1G61170,AT1G63840,AT1G64355,AT1G64950,AT1G67920,AT1G69490,AT1G71040,AT1G77640,AT2G01600,AT2G02170,AT2G02710,AT2G19710,AT2G28150,AT2G30440,AT2G44990,AT3G04930,AT3G05360,AT3G16910,AT3G26510,AT3G28580,AT3G51960,AT3G63410,AT4G00400,AT4G08900,AT4G13510,AT4G17250,AT4G22490,AT4G32020,AT4G35190,AT5G04720…

## Sheet: motif enrichment DAP-seq prom
motif ID	motif name	motif class	promoter search window	N of gene promoters with motif	N of gene promoters queried	p-value	Bonferroni adj p-value	Benjamini adj p-value	FDR	Genes
MA0005.2	AG	MADS box factors	-1000 bp to TSS	25	198	0.0185744	1	1	0.999919	AT3G53540,AT5G13750,AT5G42590,AT2G17305,AT2G27150,AT3G58780,AT3G60140,AT5G05810,AT5G24660,AT5G28940,AT1G01320,AT1G28220,AT1G55260,AT2G25800,AT3G07610,AT3G52840,AT3G53310,AT4G03400,AT4G38470,AT5G04110,AT5G04120,AT5G04590,AT5G14850,AT5G28937,AT5G48850
MA1326.1	ATHB33	Homeo domain factors	-1000 bp to TSS	23	198	0.0462865	1	1	0.999919	AT1G07910,AT1G70540,AT1G80580,AT2G07310,AT5G18300,AT5G65290,AT1G01225,AT1G66810,AT2G23060,AT3G58780,AT3G60140,AT4G00370,AT4G01000,AT5G05810,AT1G55260,AT5G04120,AT5G28937,AT1G75270,AT1G27100,AT4G04810,AT5G05090,AT5G49750,AT1G55080

## Sheet: AT2G34660_motif_result
motif name	Start	End	Sequence	Motif_Score	motif ID	motif class	promoter search window
HBI1	14601552	14601564	ACCACATGCCCA	0.633145	MA1025.1	Basic helix-loop-helix factors (bHLH)	-1000 bp to TSS
BHLH34	14601553	14601561	CCACATGC	0.789296	MA0962.1	Basic helix-loop-helix factors (bHLH)	-1000 bp to TSS
PIF3	14601553	14601563	CCACATGCCC	0.723067	MA0560.1	Basic helix-loop-helix factors (bHLH)	-1000 bp to TSS
bZIP50	14601588	14601605	GGGAGATGACGACAGAC	0.363438	MA1342.1	Basic leucine zipper factors (bZIP)	-1000 bp to TSS
TGA10	14601589	14601604	GGAGATGACGACAGA	0.556621	MA1346.1	Basic leucine zipper factors (bZIP)	-1000 bp to TSS
TGA4	14601591	14601602	AGATGACGACA	0.650702	MA1335.1	Basic leucine zipper factors (bZIP)	-1000 bp to TSS
BZIP60	14601594	14601602	TGACGACA	0.714394	MA0967.1	Basic leucine zipper factors (bZIP)	-1000 bp to TSS
MNB1A	14601627	14601632	GCTTT	1.00057	MA0053.1	C2H2 zinc finger factors	-1000 bp to TSS
MNB1A	14601636	14601641	GCTTT	1.00057	MA0053.1	C2H2 zinc finger factors	-1000 bp to TSS
LEC2	14601681	14601692	AACTGCATGCA	0.809291	MA0581.1	B3 domain	-1000 bp to TSS
ABI3	14601683	14601692	CTGCATGCA	1	MA0564.1	B3 domain	-1000 bp to TSS
FUS3	14601683	14601692	CTGCATGCA	0.739447	MA0565.1	B3 domain	-1000 bp to TSS
TCX2	14601890	14601905	TTTTGAATTTTCATT	0.753778	MA1162.1	Other	-1000 bp to TSS
bHLH69	14601901	14601916	CATTGCACGCACGTG	0.625327	MA1363.1	Basic helix-loop-helix factors (bHLH)	-1000 bp to TSS
bHLH31	14601903	14601924	TTGCACGCACGTGAACAGCAT	0.521038	MA1359.1	Basic helix-loop-helix factors (bHLH)	-1000 bp to TSS
bHLH74	14601904	14601925	TGCACGCACGTGAACAGCATA	0.529441	MA1360.1	Basic helix-loop-helix factors (bHLH)	-1000 bp to TSS
FAR1	14601905	14601920	GCACGCACGTGAACA	0.36149	MA1382.1	Zinc-coordinating	-1000 bp to TSS
HBI1	14601906	14601918	CACGCACGTGAA	0.759121	MA1025.1	Basic helix-loop-helix factors (bHLH)	-1000 bp to TSS
BIM1	14601907	14601917	ACGCACGTGA	0.816167	MA0964.1	Basic helix-loop-helix factors (bHLH)	-1000 bp to TSS
BZR1	14601907	14601927	ACGCACGTGAACAGCATAAT	0.463076	MA0550.2	Other	-1000 bp to TSS
PIF3	14601907	14601917	ACGCACGTGA	0.817194	MA0560.1	Basic helix-loop-helix factors (bHLH)	-1000 bp to TSS
AT1G78700	14601908	14601919	CGCACGTGAAC	0.585896	MA1331.1	Other	-1000 bp to TSS
AT4G18890	14601908	14601919	CGCACGTGAAC	0.637328	MA1333.1	Other	-1000 bp to TSS
AT4G36780	14601908	14601919	CGCACGTGAAC	0.575825	MA1332.1	Other	-1000 bp to TSS
BEE2	14601908	14601918	CGCACGTGAA	0.838023	MA0956.1	Basic helix-loop-helix factors (bHLH)	-1000 bp to TSS
BHLH104	14601908	14601918	CGCACGTGAA	0.268067	MA0960.1	Basic helix-loop-helix factors (bHLH)	-1000 bp to TSS
BIM2	14601908	14601918	CGCACGTGAA	0.83978	MA0965.1	Basic helix-loop-helix factors (bHLH)	-1000 bp to TSS
BIM3	14601908	14601918	CGCACGTGAA	0.803998	MA0966.1	Basic helix-loop-helix factors (bHLH)	-1000 bp to TSS
BZR2	14601908	14601919	CGCACGTGAAC	0.766304	MA0549.1	Unidentified class	-1000 bp to TSS
PHYPADRAFT_143875	14601908	14601918	CGCACGTGAA	0.81171	MA0988.1	Basic helix-loop-helix factors (bHLH)	-1000 bp to TSS
PHYPADRAFT_72483	14601908	14601918	CGCACGTGAA	0.829568	MA1011.1	Basic helix-loop-helix factors (bHLH)	-1000 bp to TSS
PIF4	14601908	14601916	CGCACGTG	0.843442	MA0561.1	Basic helix-loop-helix factors (bHLH)	-1000 bp to TSS
SPT	14601908	14601917	CGCACGTGA	0.846626	MA1061.1	Basic helix-loop-helix factors (bHLH)	-1000 bp to TSS
TSAR2	14601908	14601918	CGCACGTGAA	0.510677	MA1412.1	Basic helix-loop-helix factors (bHLH)	-1000 bp to TSS
bHLH18	14601908	14601925	CGCACGTGAACAGCATA	0.51226	MA1361.1	Basic helix-loop-helix factors (bHLH)	-1000 bp to TSS
bHLH77	14601908	14601923	CGCACGTGAACAGCA	0.526594	MA1362.1	Basic helix-loop-helix factors (bHLH)	-1000 bp to TSS
AIB	14601909	14601917	GCACGTGA	0.556822	MA0959.1	Basic helix-loop-helix factors (bHLH)	-1000 bp to TSS
BHLH13	14601909	14601917	GCACGTGA	0.69679	MA0958.1	Basic helix-loop-helix factors (bHLH)	-1000 bp to TSS
BHLH3	14601909	14601917	GCACGTGA	0.714413	MA0957.1	Basic helix-loop-helix factors (bHLH)	-1000 bp to TSS
BHLH34	14601909	14601917	GCACGTGA	0.800316	MA0962.1	Basic helix-loop-helix factors (bHLH)	-1000 bp to TSS
BHLH78	14601909	14601917	GCACGTGA	0.581969	MA0963.1	Basic helix-loop-helix factors (bHLH)	-1000 bp to TSS
MYC2	14601909	14601917	GCACGTGA	0.720837	MA0566.1	Basic helix-loop-helix factors (bHLH)	-1000 bp to TSS
MYC3	14601909	14601917	GCACGTGA	0.77058	MA0568.1	Basic helix-loop-helix factors (bHLH)	-1000 bp to TSS
MYC4	14601909	14601917	GCACGTGA	0.811761	MA0569.1	Basic helix-loop-helix factors (bHLH)	-1000 bp to TSS
PHYPADRAFT_48267	14601909	14601917	GCACGTGA	0.887939	MA1021.1	Basic helix-loop-helix factors (bHLH)	-1000 bp to TSS
PIF1	14601909	14601923	GCACGTGAACAGCA	0.616045	MA0552.1	Basic helix-loop-helix factors (bHLH)	-1000 bp to TSS
PIF5	14601909	14601917	GCACGTGA	0.950551	MA0562.1	Basic helix-loop-helix factors (bHLH)	-1000 bp to TSS
UNE10	14601909	14601917	GCACGTGA	0.873529	MA1074.1	Basic helix-loop-helix factors (bHLH)	-1000 bp to TSS
ATHB24	14601957	14601972	TCATTAATCAGTTTT	0.760692	MA1330.1	Homeo domain factors	-1000 bp to TSS
AHL25	14602009	14602017	AATTAATT	1	MA0934.1	A.T hook factors	-1000 bp to TSS
MNB1A	14602358	14602363	GCTTT	1.00057	MA0053.1	C2H2 zinc finger factors	-1000 bp to TSS
SPL8	14602399	14602415	AAAAATGTACCATATA	0.839601	MA0578.1	SBP-type zinc finger	-1000 bp to TSS
AREB3	14602553	14602568	AGGGGTGACGTATCA	0.38866	MA1338.1	Basic leucine zipper factors (bZIP)	-1000 bp to TSS
TGA1	14602555	14602566	GGGTGACGTAT	0.907972	MA0588.1	Basic leucine zipper factors (bZIP)	-1000 bp to TSS
TGA2	14602556	14602564	GGTGACGT	0.882536	MA1068.1	Basic leucine zipper factors (bZIP)	-1000 bp to TSS
TGA7	14602556	14602566	GGTGACGTAT	0.785828	MA1070.1	Basic leucine zipper factors (bZIP)	-1000 bp to TSS
bZIP14	14602556	14602566	GGTGACGTAT	0.944857	MA1407.1	Basic leucine zipper factors (bZIP)	-1000 bp to TSS
bZIP911	14602556	14602568	GGTGACGTATCA	0.246919	MA0097.1	Basic leucine zipper factors (bZIP)	-1000 bp to TSS
NAC025	14602557	14602565	GTGACGTA	0.866224	MA0935.1	NAC/NAM	-1000 bp to TSS
TGA5	14602557	14602565	GTGACGTA	0.957941	MA1047.1	Basic leucine zipper factors (bZIP)	-1000 bp to TSS
TGA1A	14602558	14602565	TGACGTA	0.998669	MA0129.1	Basic leucine zipper factors (bZIP)	-1000 bp to TSS
AT3G12730	14602606	14602620	TTGGGGAATCTTCG	0.612414	MA1166.1	Other	-1000 bp to TSS
AT2G01060	14602607	14602620	TGGGGAATCTTCG	0.629657	MA1384.1	Other	-1000 bp to TSS
AT3G04030	14602607	14602621	TGGGGAATCTTCGA	0.830252	MA1168.1	Other	-1000 bp to TSS
AT5G45580	14602607	14602621	TGGGGAATCTTCGA	0.738134	MA1163.1	Other	-1000 bp to TSS
UIF1	14602609	14602619	GGGAATCTTC	0.917715	MA1413.1	Helix-Turn-Helix	-1000 bp to TSS
AT1G13300	14602610	14602625	GGAATCTTCGAGCAA	0.714947	MA1387.1	Other	-1000 bp to TSS
AT1G25550	14602610	14602621	GGAATCTTCGA	0.979695	MA1386.1	Other	-1000 bp to TSS
AT2G03500	14602610	14602621	GGAATCTTCGA	0.878266	MA1167.1	Other	-1000 bp to TSS
AT4G37180	14602610	14602621	GGAATCTTCGA	0.9028	MA1164.1	Other	-1000 bp to TSS
AT1G49560	14602611	14602622	GAATCTTCGAG	0.795626	MA1165.1	Other	-1000 bp to TSS
AT1G69570	14602717	14602744	TTCTCCCTTTTTCTCTGTTTTCTCTGT	0.600851	MA1268.1	C2H2 zinc finger factors	-1000 bp to TSS
COG1	14602717	14602738	TTCTCCCTTTTTCTCTGTTTT	0.777655	MA1279.1	C2H2 zinc finger factors	-1000 bp to TSS
AT3G45610	14602719	14602738	CTCCCTTTTTCTCTGTTTT	0.738916	MA1270.1	C2H2 zinc finger factors	-1000 bp to TSS
AT3G52440	14602719	14602730	CTCCCTTTTTC	0.901816	MA1276.1	C2H2 zinc finger factors	-1000 bp to TSS
REF6	14602736	14602747	TTCTCTGTTTT	0.921685	MA1415.1	C2H2 zinc finger factors	-1000 bp to TSS
MNB1A	14602772	14602777	GCTTT	1.00057	MA0053.1	C2H2 zinc finger factors	-1000 bp to TSS
FAR1	14603034	14603049	TTTTTACGCGCGAAT	0.3495	MA1382.1	Zinc-coordinating	-1000 bp to TSS
OsI_08196	14603070	14603078	CTGGGTCC	0.583245	MA1050.1	Basic helix-loop-helix factors (bHLH)	-1000 bp to TSS
TCP16	14603070	14603080	CTGGGTCCAT	0.655202	MA0587.1	Basic helix-loop-helix factors (bHLH)	-1000 bp to TSS
ATHB18	14603098	14603109	ATAATGATTGA	0.830691	MA1211.1	Homeo domain factors	-1000 bp to TSS
ATHB7	14603098	14603111	ATAATGATTGATT	0.706547	MA0954.2	Homeo domain factors	-1000 bp to TSS
ATHB4	14603099	14603109	TAATGATTGA	0.811832	MA1406.1	Homeo domain factors	-1000 bp to TSS
HAT1	14603099	14603109	TAATGATTGA	0.812422	MA1024.1	Homeo domain factors	-1000 bp to TSS
HAT2	14603099	14603110	TAATGATTGAT	0.942822	MA1198.1	Homeo domain factors	-1000 bp to TSS
HAT22	14603100	14603110	AATGATTGAT	0.911234	MA1210.1	Homeo domain factors	-1000 bp to TSS
At2g38090	14603250	14603271	AAAGGAAAGGATAACGATGGG	0.80771	MA1193.1	Helix-Turn-Helix	-1000 bp to TSS
AT3G10580	14603253	14603268	GGAAAGGATAACGAT	0.709863	MA1194.1	Helix-Turn-Helix	-1000 bp to TSS
AT5G56840	14603253	14603268	GGAAAGGATAACGAT	0.611716	MA1195.1	Helix-Turn-Helix	-1000 bp to TSS
At5g05790	14603253	14603268	GGAAAGGATAACGAT	0.716954	MA1196.1	Helix-Turn-Helix	-1000 bp to TSS
At5g08520	14603253	14603266	GGAAAGGATAACG	0.676475	MA1399.1	Helix-Turn-Helix	-1000 bp to TSS
At3g11280	14603254	14603268	GAAAGGATAACGAT	0.757414	MA1188.1	Helix-Turn-Helix	-1000 bp to TSS
At5g58900	14603255	14603270	AAAGGATAACGATGG	0.702745	MA1192.1	Helix-Turn-Helix	-1000 bp to TSS
At1g49010	14603256	14603271	AAGGATAACGATGGG	0.717431	MA1186.1	Helix-Turn-Helix	-1000 bp to TSS
bHLH130	14603324	14603335	AACAAGTGGCT	0.773323	MA1358.1	Basic helix-loop-helix factors (bHLH)	-1000 bp to TSS
bHLH80	14603324	14603335	AACAAGTGGCT	0.738552	MA1357.1	Basic helix-loop-helix factors (bHLH)	-1000 bp to TSS
BHLH112	14603325	14603334	ACAAGTGGC	0.91063	MA0961.1	Basic helix-loop-helix factors (bHLH)	-1000 bp to TSS

## Sheet: AT3G08860_motif_result
motif name	Start	End	Sequence	Motif_Score	motif ID	motif class	promoter search window
TGA2	-2700401	-2700409	ACGTCATA	0.709693	MA1068.1	Basic leucine zipper factors (bZIP)	-1000 bp to TSS
TGA5	-2700400	-2700408	CACGTCAT	0.94594	MA1047.1	Basic leucine zipper factors (bZIP)	-1000 bp to TSS
TGA1A	-2700400	-2700407	CACGTCA	1	MA0129.1	Basic leucine zipper factors (bZIP)	-1000 bp to TSS
LFY	-2700362	-2700381	ATGGGTTCACTGGTCCATA	0.236025	MA0590.1	Unidentified class	-1000 bp to TSS
bHLH80	-2700324	-2700335	TACAAGTTGTA	0.68841	MA1357.1	Basic helix-loop-helix factors (bHLH)	-1000 bp to TSS
MYB27	-2700285	-2700300	TGTACCTAATAAAGC	0.530733	MA1292.1	Basic helix-loop-helix factors (bHLH)	-1000 bp to TSS
SPL8	-2700280	-2700296	AATATTGTACCTAATA	0.772965	MA0578.1	SBP-type zinc finger	-1000 bp to TSS
MYB59	-2700287	-2700295	TACCTAAT	0.889895	MA1042.1	Tryptophan cluster factors	-1000 bp to TSS
AT3G10113	-2700159	-2700174	AAAGATATTTTGTTT	0.848128	MA1191.1	Helix-Turn-Helix	-1000 bp to TSS
At3g09600	-2700161	-2700173	AGATATTTTGTT	0.951347	MA1182.1	Helix-Turn-Helix	-1000 bp to TSS
RVE1	-2700159	-2700173	AAAGATATTTTGTT	0.903377	MA1184.1	Helix-Turn-Helix	-1000 bp to TSS
At4g01280	-2700161	-2700172	AGATATTTTGT	0.93108	MA1190.1	Helix-Turn-Helix	-1000 bp to TSS
At5g52660	-2700161	-2700172	AGATATTTTGT	0.935487	MA1183.1	Helix-Turn-Helix	-1000 bp to TSS
EPR1	-2700159	-2700171	AAAGATATTTTG	0.847965	MA1401.1	Helix-Turn-Helix	-1000 bp to TSS
LCL1	-2700161	-2700171	AGATATTTTG	0.953686	MA1187.1	Helix-Turn-Helix	-1000 bp to TSS
LHY1	-2700161	-2700171	AGATATTTTG	0.97989	MA1185.1	Helix-Turn-Helix	-1000 bp to TSS
CCA1	-2700161	-2700169	AGATATTT	1.00024	MA0972.1	Tryptophan cluster factors	-1000 bp to TSS
AGL27	-2700149	-2700163	ACGGAATAAGAAAG	0.591371	MA1012.1	MADS box factors	-1000 bp to TSS
At5g58900	-2700018	-2700033	TTAGTCTTATCTTCT	0.740309	MA1192.1	Helix-Turn-Helix	-1000 bp to TSS
At1g49010	-2700017	-2700032	GTTAGTCTTATCTTC	0.674629	MA1186.1	Helix-Turn-Helix	-1000 bp to TSS
ATHB7	-2699973	-2699986	ATCCAATCATGCT	0.627976	MA0954.2	Homeo domain factors	-1000 bp to TSS
HAT1	-2699975	-2699985	CCAATCATGC	0.952146	MA1024.1	Homeo domain factors	-1000 bp to TSS
ATHB53	-2699913	-2699924	GAAATAATTGG	0.720583	MA1215.1	Homeo domain factors	-1000 bp to TSS
MYB3	-2699869	-2699880	TCAACCTACCA	0.737118	MA1038.1	Tryptophan cluster factors	-1000 bp to TSS
MYB55	-2699872	-2699880	ACCTACCA	0.776634	MA1041.1	Tryptophan cluster factors	-1000 bp to TSS
IDD5	-2699838	-2699854	CACTTGTCGTTGTGTT	0.49853	MA1370.1	C2H2 zinc finger factors	-1000 bp to TSS
Dof3	-2699757	-2699763	CGCTTT	1.00036	MA0021.1	C2H2 zinc finger factors	-1000 bp to TSS
MNB1A	-2699758	-2699763	GCTTT	1.00057	MA0053.1	C2H2 zinc finger factors	-1000 bp to TSS
ATHB15	-2699712	-2699727	GCAATCATTGTTTTA	0.679679	MA1026.2	Homeo domain factors	-1000 bp to TSS
ATHB18	-2699712	-2699723	GCAATCATTGT	0.883768	MA1211.1	Homeo domain factors	-1000 bp to TSS
ATHB7	-2699710	-2699723	ACGCAATCATTGT	0.747119	MA0954.2	Homeo domain factors	-1000 bp to TSS
HAT5	-2699711	-2699723	CGCAATCATTGT	0.653038	MA0008.2	Homeo domain factors	-1000 bp to TSS
ATHB4	-2699712	-2699722	GCAATCATTG	0.991002	MA1406.1	Homeo domain factors	-1000 bp to TSS
HAT1	-2699712	-2699722	GCAATCATTG	0.986979	MA1024.1	Homeo domain factors	-1000 bp to TSS
HAT22	-2699711	-2699721	CGCAATCATT	0.898964	MA1210.1	Homeo domain factors	-1000 bp to TSS
TSO1	-2699601	-2699616	TTTAAATTTTAAAGC	0.758242	MA1161.1	Other	-1000 bp to TSS
SOL1	-2699600	-2699615	ATTTAAATTTTAAAG	0.808066	MA1379.1	Other	-1000 bp to TSS
TCX2	-2699600	-2699615	ATTTAAATTTTAAAG	0.863486	MA1162.1	Other	-1000 bp to TSS
ATHB25	-2699528	-2699543	TGGCGTAATTAATTA	0.807497	MA1329.1	Homeo domain factors	-1000 bp to TSS
AHL25	-2699534	-2699542	AATTAATT	1	MA0934.1	A.T hook factors	-1000 bp to TSS
ATHB33	-2699530	-2699541	GCGTAATTAAT	0.944306	MA1326.1	Homeo domain factors	-1000 bp to TSS
ATHB33	-2699510	-2699521	GCGTAATTAAC	0.967415	MA1326.1	Homeo domain factors	-1000 bp to TSS
FaEOBII	-2699459	-2699469	GTACCAAACC	0.805506	MA1408.1	Helix-Turn-Helix	-1000 bp to TSS
AG	-2699336	-2699354	ATAACCTAATAAGTTAAT	0.579234	MA0005.2	MADS box factors	-1000 bp to TSS
AT1G01250	-2699090	-2699105	TTCACCGACGTTAAA	0.578059	MA1259.1	AP2/ERF domain	-1000 bp to TSS
AT1G77200	-2699091	-2699105	TCACCGACGTTAAA	0.599221	MA1230.1	AP2/ERF domain	-1000 bp to TSS
AT3G60490	-2699091	-2699105	TCACCGACGTTAAA	0.522861	MA1223.1	AP2/ERF domain	-1000 bp to TSS
AT4G32800	-2699089	-2699105	TTTCACCGACGTTAAA	0.482197	MA1241.1	AP2/ERF domain	-1000 bp to TSS
TINY	-2699089	-2699104	TTTCACCGACGTTAA	0.614047	MA1220.1	AP2/ERF domain	-1000 bp to TSS
AT2G44940	-2699088	-2699103	TTTTCACCGACGTTA	0.584293	MA1229.1	AP2/ERF domain	-1000 bp to TSS
AT3G16280	-2699089	-2699103	TTTCACCGACGTTA	0.647521	MA1253.1	AP2/ERF domain	-1000 bp to TSS
CBF2	-2699088	-2699103	TTTTCACCGACGTTA	0.615919	MA1217.1	AP2/ERF domain	-1000 bp to TSS
CBF4	-2699090	-2699103	TTCACCGACGTTA	0.767979	MA1218.1	AP2/ERF domain	-1000 bp to TSS
DEAR3	-2699086	-2699103	TTTTTTCACCGACGTTA	0.439283	MA1376.1	AP2/ERF domain	-1000 bp to TSS
RAP210	-2699088	-2699103	TTTTCACCGACGTTA	0.590584	MA1249.1	AP2/ERF domain	-1000 bp to TSS
CBF1	-2699090	-2699102	TTCACCGACGTT	0.744048	MA1224.1	AP2/ERF domain	-1000 bp to TSS
DEAR5	-2699083	-2699102	GCATTTTTTCACCGACGTT	0.492784	MA1251.1	AP2/ERF domain	-1000 bp to TSS
ARF1	-2699093	-2699101	ACCGACGT	0.802477	MA0942.1	B3 domain	-1000 bp to TSS
DREB1A	-2699091	-2699101	TCACCGACGT	0.82612	MA0971.1	AP2/ERF domain	-1000 bp to TSS
ERF039	-2699091	-2699101	TCACCGACGT	0.820232	MA0995.1	AP2/ERF domain	-1000 bp to TSS
PHYPADRAFT_182268	-2699091	-2699101	TCACCGACGT	0.823052	MA1008.1	AP2/ERF domain	-1000 bp to TSS
ERF043	-2699092	-2699100	CACCGACG	0.827376	MA0996.1	AP2/ERF domain	-1000 bp to TSS
PHYPADRAFT_28324	-2699092	-2699100	CACCGACG	0.861009	MA1023.1	AP2/ERF domain	-1000 bp to TSS
AT3G25990	-2699055	-2699076	AGTAGTGAATTAACCGCCGTT	0.250027	MA1368.1	Helix-Turn-Helix	-1000 bp to TSS
E2FA	-2699023	-2699033	CATGGCGCGG	0.859918	MA1414.1	Winged Helix-Turn-Helix	-1000 bp to TSS
AT1G19210	-2698982	-2698996	GCGGACGGAGGATG	0.619033	MA1234.1	AP2/ERF domain	-1000 bp to TSS
AT4G18450	-2698921	-2698938	AAGGCGGCGGAGAATAA	0.523506	MA1228.1	AP2/ERF domain	-1000 bp to TSS
AT1G28160	-2698922	-2698937	AGGCGGCGGAGAATA	0.663768	MA1247.1	AP2/ERF domain	-1000 bp to TSS
AT2G33710	-2698922	-2698937	AGGCGGCGGAGAATA	0.614631	MA1245.1	AP2/ERF domain	-1000 bp to TSS
DREB2	-2698916	-2698937	GTCGTAAGGCGGCGGAGAATA	0.535691	MA1258.1	AP2/ERF domain	-1000 bp to TSS
ERF5	-2698922	-2698937	AGGCGGCGGAGAATA	0.547758	MA1225.1	AP2/ERF domain	-1000 bp to TSS
PUCHI	-2698922	-2698937	AGGCGGCGGAGAATA	0.644658	MA1252.1	AP2/ERF domain	-1000 bp to TSS
RAP211	-2698922	-2698937	AGGCGGCGGAGAATA	0.598983	MA1266.1	AP2/ERF domain	-1000 bp to TSS
RAP26	-2698922	-2698937	AGGCGGCGGAGAATA	0.612922	MA1221.1	AP2/ERF domain	-1000 bp to TSS
DREB19	-2698919	-2698936	GTAAGGCGGCGGAGAAT	0.635392	MA1243.1	AP2/ERF domain	-1000 bp to TSS
ERF15	-2698921	-2698936	AAGGCGGCGGAGAAT	0.615069	MA1231.1	AP2/ERF domain	-1000 bp to TSS
AT1G36060	-2698920	-2698934	TAAGGCGGCGGAGA	0.650251	MA1263.1	AP2/ERF domain	-1000 bp to TSS
AT3G57600	-2698923	-2698934	GGCGGCGGAGA	0.794543	MA1242.1	AP2/ERF domain	-1000 bp to TSS
AT5G67000	-2698919	-2698934	GTAAGGCGGCGGAGA	0.616223	MA1261.1	AP2/ERF domain	-1000 bp to TSS
ESE1	-2698919	-2698934	GTAAGGCGGCGGAGA	0.589625	MA1264.1	AP2/ERF domain	-1000 bp to TSS
RAP21	-2698921	-2698934	AAGGCGGCGGAGA	0.653058	MA1216.1	AP2/ERF domain	-1000 bp to TSS
RAP212	-2698913	-2698934	ACCGTCGTAAGGCGGCGGAGA	0.459323	MA1256.1	AP2/ERF domain	-1000 bp to TSS
ABR1	-2698914	-2698933	CCGTCGTAAGGCGGCGGAG	0.506727	MA1244.1	AP2/ERF domain	-1000 bp to TSS
ERF105	-2698918	-2698933	CGTAAGGCGGCGGAG	0.557594	MA1000.2	AP2/ERF domain	-1000 bp to TSS
ERF112	-2698922	-2698932	AGGCGGCGGA	0.794952	MA1002.1	AP2/ERF domain	-1000 bp to TSS
CRF2	-2698923	-2698931	GGCGGCGG	1.00034	MA0975.1	AP2/ERF domain	-1000 bp to TSS
CRF4	-2698923	-2698931	GGCGGCGG	0.95982	MA0976.1	AP2/ERF domain	-1000 bp to TSS
ERF069	-2698922	-2698931	AGGCGGCGG	0.92192	MA0997.1	AP2/ERF domain	-1000 bp to TSS
ERF096	-2698921	-2698931	AAGGCGGCGG	0.894855	MA0998.1	AP2/ERF domain	-1000 bp to TSS
ERF098	-2698923	-2698931	GGCGGCGG	1.00046	MA0999.1	AP2/ERF domain	-1000 bp to TSS
ERF109	-2698923	-2698931	GGCGGCGG	0.933932	MA1053.1	AP2/ERF domain	-1000 bp to TSS
ERF11	-2698921	-2698931	AAGGCGGCGG	0.926448	MA1001.1	AP2/ERF domain	-1000 bp to TSS
ERF4	-2698923	-2698931	GGCGGCGG	1.00036	MA0992.1	AP2/ERF domain	-1000 bp to TSS
ERF6	-2698921	-2698931	AAGGCGGCGG	0.613802	MA1006.1	AP2/ERF domain	-1000 bp to TSS
ERF008	-2698922	-2698930	AGGCGGCG	0.857185	MA0979.1	AP2/ERF domain	-1000 bp to TSS
ERF094	-2698922	-2698930	AGGCGGCG	0.866815	MA1049.1	AP2/ERF domain	-1000 bp to TSS
ERF1B	-2698922	-2698930	AGGCGGCG	0.866077	MA0567.1	AP2/ERF domain	-1000 bp to TSS
ERF3	-2698922	-2698930	AGGCGGCG	0.861385	MA1005.1	AP2/ERF domain	-1000 bp to TSS
ERF7	-2698920	-2698930	TAAGGCGGCG	0.878912	MA0993.1	AP2/ERF domain	-1000 bp to TSS
ERF8	-2698920	-2698930	TAAGGCGGCG	0.886455	MA0994.1	AP2/ERF domain	-1000 bp to TSS
Os05g0497200	-2698922	-2698930	AGGCGGCG	0.587854	MA1034.1	AP2/ERF domain	-1000 bp to TSS
PHYPADRAFT_140773	-2698883	-2698893	CCGCTTTGCG	0.893449	MA0987.1	C2H2 zinc finger factors	-1000 bp to TSS
Dof3	-2698884	-2698890	CGCTTT	1.00036	MA0021.1	C2H2 zinc finger factors	-1000 bp to TSS
MNB1A	-2698885	-2698890	GCTTT	1.00057	MA0053.1	C2H2 zinc finger factors	-1000 bp to TSS
CDC5	-2698865	-2698876	GGGGCTGAGGA	0.580177	MA0579.1	Tryptophan cluster factors	-1000 bp to TSS
GATA19	-2698817	-2698828	GGGATCGGAAC	0.755571	MA1323.1	Other C4 zinc finger-type factors	-1000 bp to TSS
AT5G02460	-2698760	-2698781	AAAAAAGAAAACAGAGTAAGA	0.751152	MA1281.1	C2H2 zinc finger factors	-1000 bp to TSS
REF6	-2698767	-2698778	AAAACAGAGTA	0.943943	MA1415.1	C2H2 zinc finger factors	-1000 bp to TSS
AT1G76880	-2698755	-2698771	ACGGTAAAAAAGAAAA	0.994257	MA1366.1	Helix-Turn-Helix	-1000 bp to TSS
AT5G47660	-2698755	-2698770	ACGGTAAAAAAGAAA	0.971391	MA1365.1	Helix-Turn-Helix	-1000 bp to TSS
MYB3R5	-2698753	-2698768	CAACGGTAAAAAAGA	0.693889	MA1172.1	Helix-Turn-Helix	-1000 bp to TSS
MYB3R1	-2698752	-2698767	TCAACGGTAAAAAAG	0.717696	MA1178.1	Helix-Turn-Helix	-1000 bp to TSS
MYB3R4	-2698752	-2698767	TCAACGGTAAAAAAG	0.696167	MA1180.1	Helix-Turn-Helix	-1000 bp to TSS
MYB70	-2698753	-2698767	CAACGGTAAAAAAG	0.694916	MA1393.1	Helix-Turn-Helix	-1000 bp to TSS
GT2	-2698752	-2698766	TCAACGGTAAAAAA	0.919295	MA1208.1	Helix-Turn-Helix	-1000 bp to TSS
MYB105	-2698753	-2698766	CAACGGTAAAAAA	0.754164	MA1169.1	Helix-Turn-Helix	-1000 bp to TSS
MYB52	-2698753	-2698764	CAACGGTAAAA	0.750859	MA1171.1	Helix-Turn-Helix	-1000 bp to TSS
MYB77	-2698740	-2698755	TAACTGTTATCATCA	0.681578	MA1395.1	Helix-Turn-Helix	-1000 bp to TSS
ARALYDRAFT_484486	-2698646	-2698654	GGCCGCAC	0.487071	MA1098.1	Basic helix-loop-helix factors (bHLH)	-1000 bp to TSS
ARALYDRAFT_495258	-2698646	-2698654	GGCCGCAC	0.487071	MA1095.1	Basic helix-loop-helix factors (bHLH)	-1000 bp to TSS
HY5	-2698630	-2698646	ACTTCCGGGTGGCAAT	0.326473	MA0551.1	Basic leucine zipper factors (bZIP)	-1000 bp to TSS
GT2	-2698504	-2698518	TTATTTACCTTGAG	0.707001	MA1208.1	Helix-Turn-Helix	-1000 bp to TSS
AT1G76880	-2698499	-2698515	TATCATTATTTACCTT	0.68871	MA1366.1	Helix-Turn-Helix	-1000 bp to TSS
bZIP911	-2698436	-2698448	GGTCAAGTCATC	0.316838	MA0097.1	Basic leucine zipper factors (bZIP)	-1000 bp to TSS
WRKY63	-2698435	-2698443	CGGTCAAG	0.921273	MA1092.1	WRKY	-1000 bp to TSS

## Sheet: AT1G30520_motif_result
motif name	Start	End	Sequence	Motif_Score	motif ID	motif class	promoter search window
AGL1	10809475	10809493	TTTGCGTTTTCGGGTAAC	0.563379	MA0585.1	MADS box factors	-1000 bp to TSS
bHLH74	10809560	10809581	CACAACCAGCACGTGATTCAT	0.491652	MA1360.1	Basic helix-loop-helix factors (bHLH)	-1000 bp to TSS
FHY3	10809565	10809577	CCAGCACGTGAT	0.607621	MA0557.1	SWIM-type zinc finger	-1000 bp to TSS
HBI1	10809565	10809577	CCAGCACGTGAT	0.740757	MA1025.1	Basic helix-loop-helix factors (bHLH)	-1000 bp to TSS
BIM1	10809566	10809576	CAGCACGTGA	0.84062	MA0964.1	Basic helix-loop-helix factors (bHLH)	-1000 bp to TSS
BEE2	10809567	10809577	AGCACGTGAT	0.781354	MA0956.1	Basic helix-loop-helix factors (bHLH)	-1000 bp to TSS
BHLH104	10809567	10809577	AGCACGTGAT	0.452324	MA0960.1	Basic helix-loop-helix factors (bHLH)	-1000 bp to TSS
BIM2	10809567	10809577	AGCACGTGAT	0.797496	MA0965.1	Basic helix-loop-helix factors (bHLH)	-1000 bp to TSS
BIM3	10809567	10809577	AGCACGTGAT	0.806824	MA0966.1	Basic helix-loop-helix factors (bHLH)	-1000 bp to TSS
PHYPADRAFT_143875	10809567	10809577	AGCACGTGAT	0.749236	MA0988.1	Basic helix-loop-helix factors (bHLH)	-1000 bp to TSS
PHYPADRAFT_72483	10809567	10809577	AGCACGTGAT	0.815392	MA1011.1	Basic helix-loop-helix factors (bHLH)	-1000 bp to TSS
bHLH77	10809567	10809582	AGCACGTGATTCATC	0.693623	MA1362.1	Basic helix-loop-helix factors (bHLH)	-1000 bp to TSS
AIB	10809568	10809576	GCACGTGA	0.556822	MA0959.1	Basic helix-loop-helix factors (bHLH)	-1000 bp to TSS
BHLH13	10809568	10809576	GCACGTGA	0.69679	MA0958.1	Basic helix-loop-helix factors (bHLH)	-1000 bp to TSS
BHLH3	10809568	10809576	GCACGTGA	0.714413	MA0957.1	Basic helix-loop-helix factors (bHLH)	-1000 bp to TSS
BHLH34	10809568	10809576	GCACGTGA	0.800316	MA0962.1	Basic helix-loop-helix factors (bHLH)	-1000 bp to TSS
BHLH78	10809568	10809576	GCACGTGA	0.581969	MA0963.1	Basic helix-loop-helix factors (bHLH)	-1000 bp to TSS
MYC2	10809568	10809576	GCACGTGA	0.720837	MA0566.1	Basic helix-loop-helix factors (bHLH)	-1000 bp to TSS
MYC3	10809568	10809576	GCACGTGA	0.77058	MA0568.1	Basic helix-loop-helix factors (bHLH)	-1000 bp to TSS
MYC4	10809568	10809576	GCACGTGA	0.811761	MA0569.1	Basic helix-loop-helix factors (bHLH)	-1000 bp to TSS
PHYPADRAFT_48267	10809568	10809576	GCACGTGA	0.887939	MA1021.1	Basic helix-loop-helix factors (bHLH)	-1000 bp to TSS
PIF5	10809568	10809576	GCACGTGA	0.950551	MA0562.1	Basic helix-loop-helix factors (bHLH)	-1000 bp to TSS
UNE10	10809568	10809576	GCACGTGA	0.873529	MA1074.1	Basic helix-loop-helix factors (bHLH)	-1000 bp to TSS
FHY3	10809579	10809591	ATCACGCGATCA	0.659497	MA0557.1	SWIM-type zinc finger	-1000 bp to TSS
At5g05790	10809587	10809602	ATCATCATCCTGATC	0.770815	MA1196.1	Helix-Turn-Helix	-1000 bp to TSS
bZIP911	10809621	10809633	GGAGACTTCACC	0.278626	MA0097.1	Basic leucine zipper factors (bZIP)	-1000 bp to TSS
TCP3	10809689	10809702	AGGTGGTCCAAAG	0.613965	MA1289.1	Basic helix-loop-helix factors (bHLH)	-1000 bp to TSS
TCP24	10809690	10809702	GGTGGTCCAAAG	0.627408	MA1286.1	Basic helix-loop-helix factors (bHLH)	-1000 bp to TSS
ARALYDRAFT_496250	10809691	10809699	GTGGTCCA	0.490615	MA1096.1	Basic helix-loop-helix factors (bHLH)	-1000 bp to TSS
ARALYDRAFT_897773	10809691	10809701	GTGGTCCAAA	0.711396	MA1054.1	Basic helix-loop-helix factors (bHLH)	-1000 bp to TSS
TCP17	10809691	10809702	GTGGTCCAAAG	0.396699	MA1290.1	Basic helix-loop-helix factors (bHLH)	-1000 bp to TSS
TCP4	10809691	10809699	GTGGTCCA	0.792992	MA1035.1	Basic helix-loop-helix factors (bHLH)	-1000 bp to TSS
bZIP50	10809698	10809715	AAAGAATGACGTCATTT	0.660419	MA1342.1	Basic leucine zipper factors (bZIP)	-1000 bp to TSS
TGA10	10809699	10809714	AAGAATGACGTCATT	0.610072	MA1346.1	Basic leucine zipper factors (bZIP)	-1000 bp to TSS
TGA3	10809700	10809714	AGAATGACGTCATT	0.67898	MA1336.1	Basic leucine zipper factors (bZIP)	-1000 bp to TSS
TGA4	10809701	10809712	GAATGACGTCA	0.678118	MA1335.1	Basic leucine zipper factors (bZIP)	-1000 bp to TSS
TGA9	10809703	10809714	ATGACGTCATT	0.757664	MA1348.1	Basic leucine zipper factors (bZIP)	-1000 bp to TSS
bZIP910	10809703	10809710	ATGACGT	0.939094	MA0096.1	Basic leucine zipper factors (bZIP)	-1000 bp to TSS
BZIP60	10809704	10809712	TGACGTCA	1	MA0967.1	Basic leucine zipper factors (bZIP)	-1000 bp to TSS
TGA6	10809704	10809714	TGACGTCATT	0.909984	MA1069.1	Basic leucine zipper factors (bZIP)	-1000 bp to TSS
TGA7	10809704	10809714	TGACGTCATT	0.814431	MA1070.1	Basic leucine zipper factors (bZIP)	-1000 bp to TSS
bZIP14	10809704	10809714	TGACGTCATT	0.832786	MA1407.1	Basic leucine zipper factors (bZIP)	-1000 bp to TSS
TGA5	10809705	10809713	GACGTCAT	0.984403	MA1047.1	Basic leucine zipper factors (bZIP)	-1000 bp to TSS
GATA15	10809751	10809760	CGTGATCGG	0.987419	MA1016.1	Other C4 zinc finger-type factors	-1000 bp to TSS
ERF018	10809757	10809765	CGGACGGT	0.703652	MA1048.1	AP2/ERF domain	-1000 bp to TSS
AGL42	10809803	10809810	GATGATG	1.00036	MA1201.1	MADS box factors	-1000 bp to TSS
ARALYDRAFT_484486	10809856	10809864	GTGCGGCC	0.487257	MA1098.1	Basic helix-loop-helix factors (bHLH)	-1000 bp to TSS
ARALYDRAFT_495258	10809856	10809864	GTGCGGCC	0.487257	MA1095.1	Basic helix-loop-helix factors (bHLH)	-1000 bp to TSS
MNB1A	10809938	10809943	GCTTT	1.00057	MA0053.1	C2H2 zinc finger factors	-1000 bp to TSS
WRKY47	10810033	10810047	TTCCACGTTGGCTA	0.55758	MA1312.1	WRKY	-1000 bp to TSS
MNB1A	10810071	10810076	GCTTT	1.00057	MA0053.1	C2H2 zinc finger factors	-1000 bp to TSS
ARF2	10810111	10810121	CTTGTCGGAG	0.92427	MA1206.1	B3 domain	-1000 bp to TSS
ARF8	10810111	10810120	CTTGTCGGA	0.884973	MA0944.1	B3 domain	-1000 bp to TSS
ARF3	10810113	10810121	TGTCGGAG	0.948232	MA1009.1	B3 domain	-1000 bp to TSS
COG1	10810266	10810287	AATAGCGTGAAAAAGGAAAAA	0.673331	MA1279.1	C2H2 zinc finger factors	-1000 bp to TSS
AT3G52440	10810274	10810285	GAAAAAGGAAA	0.913078	MA1276.1	C2H2 zinc finger factors	-1000 bp to TSS
DAG2	10810274	10810285	GAAAAAGGAAA	0.954064	MA1271.1	C2H2 zinc finger factors	-1000 bp to TSS
OBP4	10810274	10810288	GAAAAAGGAAAAAT	0.92733	MA1280.1	C2H2 zinc finger factors	-1000 bp to TSS
OBP1	10810275	10810296	AAAAAGGAAAAATAACAAGTA	0.757394	MA1278.1	C2H2 zinc finger factors	-1000 bp to TSS
AGL15	10810406	10810425	AATTTCCAGAAACAGAAAA	0.619233	MA0548.2	MADS box factors	-1000 bp to TSS
FLC	10810406	10810427	AATTTCCAGAAACAGAAAAAC	0.650482	MA0558.1	MADS box factors	-1000 bp to TSS
SVP	10810407	10810427	ATTTCCAGAAACAGAAAAAC	0.678672	MA0555.1	MADS box factors	-1000 bp to TSS
AGL13	10810408	10810426	TTTCCAGAAACAGAAAAA	0.642558	MA1204.1	MADS box factors	-1000 bp to TSS
AGL6	10810408	10810427	TTTCCAGAAACAGAAAAAC	0.699921	MA1205.1	MADS box factors	-1000 bp to TSS
AGL16	10810409	10810424	TTCCAGAAACAGAAA	0.634026	MA1199.1	MADS box factors	-1000 bp to TSS
AGL63	10810409	10810424	TTCCAGAAACAGAAA	0.616636	MA1203.1	MADS box factors	-1000 bp to TSS
AGL42	10810485	10810492	GATGATG	1.00036	MA1201.1	MADS box factors	-1000 bp to TSS
PEND	10810499	10810509	AAGAAGAAGT	0.885254	MA0127.1	Unidentified class	-1000 bp to TSS
bZIP42	10810515	10810527	GCCGCTTCAGCA	0.198254	MA1350.1	Basic leucine zipper factors (bZIP)	-1000 bp to TSS
PIF5	10810531	10810539	CCATGTGA	0.87503	MA0562.1	Basic helix-loop-helix factors (bHLH)	-1000 bp to TSS
PLT1	10810581	10810600	CGCACGTATCTCAAAAATG	0.453882	MA1377.1	AP2/ERF domain	-1000 bp to TSS
PLT3	10810582	10810597	GCACGTATCTCAAAA	0.51082	MA1378.1	AP2/ERF domain	-1000 bp to TSS
ARR11	10810585	10810593	CGTATCTC	0.809197	MA0946.1	Tryptophan cluster factors	-1000 bp to TSS
MYB55	10810850	10810858	ACCAAACG	0.751267	MA1041.1	Tryptophan cluster factors	-1000 bp to TSS
NAC043	10810886	10810896	ATAACGTAAG	0.991789	MA1045.1	NAC/NAM	-1000 bp to TSS
At1g49010	10810892	10810907	TAAGATAAGGAGAGG	0.752301	MA1186.1	Helix-Turn-Helix	-1000 bp to TSS
bZIP42	10810916	10810928	CGATGACATGTA	0.220332	MA1350.1	Basic leucine zipper factors (bZIP)	-1000 bp to TSS
bZIP43	10810916	10810928	CGATGACATGTA	0.257535	MA1339.1	Basic leucine zipper factors (bZIP)	-1000 bp to TSS
bZIP911	10810917	10810929	GATGACATGTAC	0.383168	MA0097.1	Basic leucine zipper factors (bZIP)	-1000 bp to TSS
ABF1	10810922	10810941	CATGTACTGCCACGTCATC	0.503545	MA0570.1	Basic leucine zipper factors (bZIP)	-1000 bp to TSS
SPL9	10810922	10810933	CATGTACTGCC	0.829262	MA1322.1	SBP-type zinc finger	-1000 bp to TSS
O2	10810928	10810941	CTGCCACGTCATC	0.939146	MA1417.1	Basic leucine zipper factors (bZIP)	-1000 bp to TSS
AREB3	10810929	10810944	TGCCACGTCATCAAT	0.853633	MA1338.1	Basic leucine zipper factors (bZIP)	-1000 bp to TSS
GBF3	10810929	10810944	TGCCACGTCATCAAT	0.896342	MA1351.1	Basic leucine zipper factors (bZIP)	-1000 bp to TSS
GBF6	10810929	10810944	TGCCACGTCATCAAT	0.875599	MA1334.1	Basic leucine zipper factors (bZIP)	-1000 bp to TSS
TGA10	10810929	10810944	TGCCACGTCATCAAT	0.594661	MA1346.1	Basic leucine zipper factors (bZIP)	-1000 bp to TSS
bZIP16	10810929	10810944	TGCCACGTCATCAAT	0.862181	MA1349.1	Basic leucine zipper factors (bZIP)	-1000 bp to TSS
bZIP28	10810929	10810944	TGCCACGTCATCAAT	0.94931	MA1344.1	Basic leucine zipper factors (bZIP)	-1000 bp to TSS
bZIP3	10810929	10810944	TGCCACGTCATCAAT	0.886194	MA1340.1	Basic leucine zipper factors (bZIP)	-1000 bp to TSS
bZIP44	10810929	10810944	TGCCACGTCATCAAT	0.877172	MA1337.1	Basic leucine zipper factors (bZIP)	-1000 bp to TSS
bZIP53	10810929	10810944	TGCCACGTCATCAAT	0.865397	MA1341.1	Basic leucine zipper factors (bZIP)	-1000 bp to TSS
bZIP911	10810929	10810941	TGCCACGTCATC	0.733083	MA0097.1	Basic leucine zipper factors (bZIP)	-1000 bp to TSS
TGA9	10810930	10810941	GCCACGTCATC	0.586322	MA1348.1	Basic leucine zipper factors (bZIP)	-1000 bp to TSS
bZIP42	10810930	10810942	GCCACGTCATCA	0.86128	MA1350.1	Basic leucine zipper factors (bZIP)	-1000 bp to TSS
bZIP43	10810930	10810942	GCCACGTCATCA	0.860242	MA1339.1	Basic leucine zipper factors (bZIP)	-1000 bp to TSS
bZIP48	10810930	10810944	GCCACGTCATCAAT	0.85089	MA1345.1	Basic leucine zipper factors (bZIP)	-1000 bp to TSS
TGA1	10810931	10810942	CCACGTCATCA	0.931699	MA0588.1	Basic leucine zipper factors (bZIP)	-1000 bp to TSS
TGA4	10810931	10810942	CCACGTCATCA	0.846769	MA1335.1	Basic leucine zipper factors (bZIP)	-1000 bp to TSS
TGA6	10810931	10810941	CCACGTCATC	0.739175	MA1069.1	Basic leucine zipper factors (bZIP)	-1000 bp to TSS
TGA1A	10810932	10810939	CACGTCA	1	MA0129.1	Basic leucine zipper factors (bZIP)	-1000 bp to TSS
TGA5	10810932	10810940	CACGTCAT	0.94594	MA1047.1	Basic leucine zipper factors (bZIP)	-1000 bp to TSS
TGA2	10810933	10810941	ACGTCATC	0.973155	MA1068.1	Basic leucine zipper factors (bZIP)	-1000 bp to TSS
ATHB33	10811041	10811052	GCTAATCACTC	0.875285	MA1326.1	Homeo domain factors	-1000 bp to TSS
ZAP1	10811086	10811097	GCCTCCGTCAA	0.60506	MA0589.1	WRKY	-1000 bp to TSS
ERF3	10811103	10811111	CGCCGTCG	0.787832	MA1005.1	AP2/ERF domain	-1000 bp to TSS
ERF7	10811103	10811113	CGCCGTCGTC	0.85872	MA0993.1	AP2/ERF domain	-1000 bp to TSS
ERF8	10811103	10811113	CGCCGTCGTC	0.844059	MA0994.1	AP2/ERF domain	-1000 bp to TSS
DREB2C	10811136	10811144	CACCGGCA	0.796456	MA0986.1	AP2/ERF domain	-1000 bp to TSS
WRKY12	10811151	10811159	CGTTGACG	0.818627	MA1075.1	WRKY	-1000 bp to TSS
WRKY21	10811151	10811161	CGTTGACGGC	0.826581	MA1079.1	WRKY	-1000 bp to TSS
WRKY48	10811151	10811161	CGTTGACGGC	0.873562	MA1088.1	WRKY	-1000 bp to TSS
WRKY8	10811151	10811160	CGTTGACGG	0.855229	MA1094.1	WRKY	-1000 bp to TSS
ERF7	10811152	10811162	GTTGACGGCG	0.85681	MA0993.1	AP2/ERF domain	-1000 bp to TSS
ERF8	10811152	10811162	GTTGACGGCG	0.855175	MA0994.1	AP2/ERF domain	-1000 bp to TSS
ZAP1	10811153	10811164	TTGACGGCGTA	0.497064	MA0589.1	WRKY	-1000 bp to TSS
ERF1B	10811154	10811162	TGACGGCG	0.684418	MA0567.1	AP2/ERF domain	-1000 bp to TSS
ERF3	10811154	10811162	TGACGGCG	0.801761	MA1005.1	AP2/ERF domain	-1000 bp to TSS
ERF6	10811171	10811181	TTGCCGCCGG	0.7151	MA1006.1	AP2/ERF domain	-1000 bp to TSS
PLT1	10811189	10811208	GTCTCGGCCTCCGAAACGG	0.411542	MA1377.1	AP2/ERF domain	-1000 bp to TSS
MYB52	10811202	10811213	AAACGGTGATG	0.781899	MA1171.1	Helix-Turn-Helix	-1000 bp to TSS
TGA10	10811203	10811218	AACGGTGATGTCGTC	0.498329	MA1346.1	Basic leucine zipper factors (bZIP)	-1000 bp to TSS
TGA4	10811205	10811216	CGGTGATGTCG	0.648232	MA1335.1	Basic leucine zipper factors (bZIP)	-1000 bp to TSS
TGA9	10811206	10811217	GGTGATGTCGT	0.49436	MA1348.1	Basic leucine zipper factors (bZIP)	-1000 bp to TSS
MNB1A	10811227	10811232	GCTTT	1.00057	MA0053.1	C2H2 zinc finger factors	-1000 bp to TSS
TSO1	10811264	10811279	TTTTTCAAATTTGAA	0.789833	MA1161.1	Other	-1000 bp to TSS
SOL1	10811265	10811280	TTTTCAAATTTGAAT	0.818146	MA1379.1	Other	-1000 bp to TSS
TCX2	10811265	10811280	TTTTCAAATTTGAAT	0.890623	MA1162.1	Other	-1000 bp to TSS
MYB3R5	10811317	10811332	GAATCTGAACCGTTG	0.675609	MA1172.1	Helix-Turn-Helix	-1000 bp to TSS
MYB3R1	10811318	10811333	AATCTGAACCGTTGA	0.640259	MA1178.1	Helix-Turn-Helix	-1000 bp to TSS
MYB3R4	10811318	10811333	AATCTGAACCGTTGA	0.632166	MA1180.1	Helix-Turn-Helix	-1000 bp to TSS
MYB52	10811321	10811332	CTGAACCGTTG	0.745097	MA1171.1	Helix-Turn-Helix	-1000 bp to TSS

## Sheet: AT1G27100_motif_result
motif name	Start	End	Sequence	Motif_Score	motif ID	motif class	promoter search window
TGA7	-9412199	-9412209	GGTGACGCAT	0.700009	MA1070.1	Basic leucine zipper factors (bZIP)	-1000 bp to TSS
SPL8	-9412125	-9412141	TAATTTGTACCTTCCA	0.779289	MA0578.1	SBP-type zinc finger	-1000 bp to TSS
MNB1A	-9412106	-9412111	GCTTT	1.00057	MA0053.1	C2H2 zinc finger factors	-1000 bp to TSS
CBF2	-9412090	-9412105	ATGTGGCCGACGTAG	0.679526	MA1217.1	AP2/ERF domain	-1000 bp to TSS
CBF4	-9412092	-9412105	GTGGCCGACGTAG	0.816118	MA1218.1	AP2/ERF domain	-1000 bp to TSS
RAP210	-9412090	-9412105	ATGTGGCCGACGTAG	0.598622	MA1249.1	AP2/ERF domain	-1000 bp to TSS
CBF1	-9412092	-9412104	GTGGCCGACGTA	0.783532	MA1224.1	AP2/ERF domain	-1000 bp to TSS
DRE1C	-9412095	-9412103	GCCGACGT	0.534183	MA0985.1	Beta-Hairpin-Ribbon	-1000 bp to TSS
DREB1A	-9412093	-9412103	TGGCCGACGT	0.872325	MA0971.1	AP2/ERF domain	-1000 bp to TSS
DREB1E	-9412095	-9412103	GCCGACGT	0.686395	MA0978.1	AP2/ERF domain	-1000 bp to TSS
RAV1	-9412087	-9412099	CTTATGTGGCCG	0.8251	MA0582.1	AP2/ERF domain	-1000 bp to TSS
GBF6	-9412083	-9412098	TTGGCTTATGTGGCC	0.342653	MA1334.1	Basic leucine zipper factors (bZIP)	-1000 bp to TSS
bZIP44	-9412083	-9412098	TTGGCTTATGTGGCC	0.417471	MA1337.1	Basic leucine zipper factors (bZIP)	-1000 bp to TSS
bZIP53	-9412083	-9412098	TTGGCTTATGTGGCC	0.326933	MA1341.1	Basic leucine zipper factors (bZIP)	-1000 bp to TSS
bZIP48	-9412083	-9412097	TTGGCTTATGTGGC	0.372316	MA1345.1	Basic leucine zipper factors (bZIP)	-1000 bp to TSS
At1g19000	-9412000	-9412014	TTCTGGATAAGCCG	0.606346	MA1400.1	Helix-Turn-Helix	-1000 bp to TSS
BZR1	-9411979	-9411999	ATATACGTGTGACTCCTATC	0.372814	MA0550.2	Other	-1000 bp to TSS
GATA6	-9411946	-9411959	TAGATCTAGATAC	0.876995	MA1396.1	Other C4 zinc finger-type factors	-1000 bp to TSS
GATA14	-9411941	-9411956	ATAAATAGATCTAGA	0.792241	MA1325.1	Other C4 zinc finger-type factors	-1000 bp to TSS
GATA9	-9411945	-9411956	ATAGATCTAGA	0.855938	MA1018.1	Other C4 zinc finger-type factors	-1000 bp to TSS
GATA12	-9411946	-9411954	TAGATCTA	0.925022	MA1015.1	Other C4 zinc finger-type factors	-1000 bp to TSS
FAR1	-9411813	-9411828	TAGAGCGCGTGGGCT	0.718174	MA1382.1	Zinc-coordinating	-1000 bp to TSS
BIM1	-9411817	-9411827	GCGCGTGGGC	0.829684	MA0964.1	Basic helix-loop-helix factors (bHLH)	-1000 bp to TSS
BZR2	-9411816	-9411827	AGCGCGTGGGC	0.704337	MA0549.1	Unidentified class	-1000 bp to TSS
CAMTA1	-9411814	-9411826	AGAGCGCGTGGG	0.869133	MA1197.1	Other	-1000 bp to TSS
CMTA3	-9411817	-9411826	GCGCGTGGG	0.859166	MA0970.1	CG-1 domain	-1000 bp to TSS
FHY3	-9411814	-9411826	AGAGCGCGTGGG	0.969667	MA0557.1	SWIM-type zinc finger	-1000 bp to TSS
TSAR1	-9411816	-9411826	AGCGCGTGGG	0.573512	MA1411.1	Basic helix-loop-helix factors (bHLH)	-1000 bp to TSS
TSAR2	-9411816	-9411826	AGCGCGTGGG	0.59402	MA1412.1	Basic helix-loop-helix factors (bHLH)	-1000 bp to TSS
BHLH34	-9411817	-9411825	GCGCGTGG	0.951719	MA0962.1	Basic helix-loop-helix factors (bHLH)	-1000 bp to TSS
CMTA2	-9411814	-9411823	AGAGCGCGT	0.893391	MA0969.1	CG-1 domain	-1000 bp to TSS
AT2G40260	-9411785	-9411800	AAAAGAATGTATTTA	0.880875	MA1385.1	Other	-1000 bp to TSS
SOL1	-9411592	-9411607	TTTGAGAATTTAAAT	0.757772	MA1379.1	Other	-1000 bp to TSS
TSO1	-9411591	-9411606	ATTTGAGAATTTAAA	0.778211	MA1161.1	Other	-1000 bp to TSS
FAR1	-9411356	-9411371	ACCTCACGCGCGTAA	0.746692	MA1382.1	Zinc-coordinating	-1000 bp to TSS
CAMTA1	-9411358	-9411370	CTCACGCGCGTA	0.635231	MA1197.1	Other	-1000 bp to TSS
FHY3	-9411358	-9411370	CTCACGCGCGTA	0.79828	MA0557.1	SWIM-type zinc finger	-1000 bp to TSS
BZR2	-9411357	-9411368	CCTCACGCGCG	0.703298	MA0549.1	Unidentified class	-1000 bp to TSS
PHYPADRAFT_72483	-9411358	-9411368	CTCACGCGCG	0.762628	MA1011.1	Basic helix-loop-helix factors (bHLH)	-1000 bp to TSS
TSAR2	-9411358	-9411368	CTCACGCGCG	0.517654	MA1412.1	Basic helix-loop-helix factors (bHLH)	-1000 bp to TSS
BIM1	-9411357	-9411367	CCTCACGCGC	0.864352	MA0964.1	Basic helix-loop-helix factors (bHLH)	-1000 bp to TSS
CMTA3	-9411358	-9411367	CTCACGCGC	0.814833	MA0970.1	CG-1 domain	-1000 bp to TSS
NAC083	-9411333	-9411343	CTACGTAACT	0.758159	MA1043.1	NAC/NAM	-1000 bp to TSS
NAC025	-9411334	-9411342	TACGTAAC	0.972598	MA0935.1	NAC/NAM	-1000 bp to TSS
MYB3	-9411328	-9411339	TCCACCTACGT	0.65523	MA1038.1	Tryptophan cluster factors	-1000 bp to TSS
AGL42	-9411150	-9411157	GATGATG	1.00036	MA1201.1	MADS box factors	-1000 bp to TSS
REF6	-9411112	-9411123	AAAACAGAGAA	0.920971	MA1415.1	C2H2 zinc finger factors	-1000 bp to TSS
NAC083	-9411033	-9411043	CTACGTAACT	0.758159	MA1043.1	NAC/NAM	-1000 bp to TSS
NAC025	-9411034	-9411042	TACGTAAC	0.972598	MA0935.1	NAC/NAM	-1000 bp to TSS
ERF38	-9411004	-9411019	CGTCGGCGACTAAAA	0.579279	MA1238.1	AP2/ERF domain	-1000 bp to TSS
DEAR3	-9411001	-9411018	CATCGTCGGCGACTAAA	0.441269	MA1376.1	AP2/ERF domain	-1000 bp to TSS
AT2G44940	-9411001	-9411016	CATCGTCGGCGACTA	0.637889	MA1229.1	AP2/ERF domain	-1000 bp to TSS
CBF2	-9411001	-9411016	CATCGTCGGCGACTA	0.528078	MA1217.1	AP2/ERF domain	-1000 bp to TSS
RAP210	-9411001	-9411016	CATCGTCGGCGACTA	0.763242	MA1249.1	AP2/ERF domain	-1000 bp to TSS
AT3G16280	-9411001	-9411015	CATCGTCGGCGACT	0.596885	MA1253.1	AP2/ERF domain	-1000 bp to TSS
AT4G32800	-9410999	-9411015	GTCATCGTCGGCGACT	0.503413	MA1241.1	AP2/ERF domain	-1000 bp to TSS
TINY	-9411000	-9411015	TCATCGTCGGCGACT	0.676925	MA1220.1	AP2/ERF domain	-1000 bp to TSS
AT1G01250	-9410999	-9411014	GTCATCGTCGGCGAC	0.618377	MA1259.1	AP2/ERF domain	-1000 bp to TSS
CBF1	-9411002	-9411014	ATCGTCGGCGAC	0.762193	MA1224.1	AP2/ERF domain	-1000 bp to TSS
CBF4	-9411001	-9411014	CATCGTCGGCGAC	0.738917	MA1218.1	AP2/ERF domain	-1000 bp to TSS
AT1G77200	-9410999	-9411013	GTCATCGTCGGCGA	0.703323	MA1230.1	AP2/ERF domain	-1000 bp to TSS
AT3G60490	-9410999	-9411013	GTCATCGTCGGCGA	0.554398	MA1223.1	AP2/ERF domain	-1000 bp to TSS
DREB1A	-9411003	-9411013	TCGTCGGCGA	0.771812	MA0971.1	AP2/ERF domain	-1000 bp to TSS
ERF039	-9411003	-9411013	TCGTCGGCGA	0.849369	MA0995.1	AP2/ERF domain	-1000 bp to TSS
ERF008	-9411004	-9411012	CGTCGGCG	0.88145	MA0979.1	AP2/ERF domain	-1000 bp to TSS
PHYPADRAFT_28324	-9411004	-9411012	CGTCGGCG	0.795774	MA1023.1	AP2/ERF domain	-1000 bp to TSS
MNB1A	-9410978	-9410983	GCTTT	1.00057	MA0053.1	C2H2 zinc finger factors	-1000 bp to TSS
At2g45680	-9410933	-9410954	GACGGGCTCCACCGTCCAAAC	0.216854	MA1285.1	Basic helix-loop-helix factors (bHLH)	-1000 bp to TSS
DEAR3	-9410936	-9410953	GGGCTCCACCGTCCAAA	0.545143	MA1376.1	AP2/ERF domain	-1000 bp to TSS
AT1G19210	-9410938	-9410952	GCTCCACCGTCCAA	0.86108	MA1234.1	AP2/ERF domain	-1000 bp to TSS
AT1G36060	-9410938	-9410952	GCTCCACCGTCCAA	0.815226	MA1263.1	AP2/ERF domain	-1000 bp to TSS
DEAR5	-9410933	-9410952	GACGGGCTCCACCGTCCAA	0.589133	MA1251.1	AP2/ERF domain	-1000 bp to TSS
ERF018	-9410943	-9410951	ACCGTCCA	0.865857	MA1048.1	AP2/ERF domain	-1000 bp to TSS
CEJ1	-9410935	-9410950	CGGGCTCCACCGTCC	0.679841	MA1219.1	AP2/ERF domain	-1000 bp to TSS
AT4G28140	-9410929	-9410949	CGACGACGGGCTCCACCGTC	0.665277	MA1232.1	AP2/ERF domain	-1000 bp to TSS
DREB26	-9410929	-9410949	CGACGACGGGCTCCACCGTC	0.627066	MA1248.1	AP2/ERF domain	-1000 bp to TSS
At1g72010	-9410934	-9410947	ACGGGCTCCACCG	0.554739	MA1288.1	Basic helix-loop-helix factors (bHLH)	-1000 bp to TSS
TCP20	-9410937	-9410947	GGCTCCACCG	0.727215	MA1065.1	Basic helix-loop-helix factors (bHLH)	-1000 bp to TSS
At5g08330	-9410932	-9410946	CGACGGGCTCCACC	0.498433	MA1287.1	Basic helix-loop-helix factors (bHLH)	-1000 bp to TSS
OsI_08196	-9410937	-9410945	GGCTCCAC	0.60136	MA1050.1	Basic helix-loop-helix factors (bHLH)	-1000 bp to TSS
TCP15	-9410937	-9410945	GGCTCCAC	0.560814	MA1062.1	Basic helix-loop-helix factors (bHLH)	-1000 bp to TSS
TCP16	-9410935	-9410945	CGGGCTCCAC	0.666429	MA0587.1	Basic helix-loop-helix factors (bHLH)	-1000 bp to TSS
TCP19	-9410935	-9410945	CGGGCTCCAC	0.773966	MA1063.1	Basic helix-loop-helix factors (bHLH)	-1000 bp to TSS
TCP7	-9410934	-9410945	ACGGGCTCCAC	0.469284	MA1291.1	Basic helix-loop-helix factors (bHLH)	-1000 bp to TSS
At3g11280	-9410907	-9410921	AACCTTATCAGATT	0.746902	MA1188.1	Helix-Turn-Helix	-1000 bp to TSS
At1g49010	-9410904	-9410919	TTTAACCTTATCAGA	0.676346	MA1186.1	Helix-Turn-Helix	-1000 bp to TSS
BHLH104	-9410884	-9410894	AGTACGTGCC	0.352454	MA0960.1	Basic helix-loop-helix factors (bHLH)	-1000 bp to TSS
BIM3	-9410884	-9410894	AGTACGTGCC	0.708644	MA0966.1	Basic helix-loop-helix factors (bHLH)	-1000 bp to TSS
BHLH78	-9410885	-9410893	GTACGTGC	0.582066	MA0963.1	Basic helix-loop-helix factors (bHLH)	-1000 bp to TSS
MYB52	-9410861	-9410872	TAACGGTTTGT	0.749684	MA1171.1	Helix-Turn-Helix	-1000 bp to TSS
MYB56	-9410856	-9410871	AACAATAACGGTTTG	0.777718	MA1174.1	Helix-Turn-Helix	-1000 bp to TSS
MYB62	-9410850	-9410865	ATACCTAACAATAAC	0.652971	MA1294.1	Basic helix-loop-helix factors (bHLH)	-1000 bp to TSS
MYB27	-9410849	-9410864	CATACCTAACAATAA	0.571618	MA1292.1	Basic helix-loop-helix factors (bHLH)	-1000 bp to TSS
MYB57	-9410849	-9410863	CATACCTAACAATA	0.627127	MA1293.1	Basic helix-loop-helix factors (bHLH)	-1000 bp to TSS
FaEOBII	-9410850	-9410860	ATACCTAACA	0.865097	MA1408.1	Helix-Turn-Helix	-1000 bp to TSS
MYB3	-9410849	-9410860	CATACCTAACA	0.677297	MA1038.1	Tryptophan cluster factors	-1000 bp to TSS
MYB111	-9410851	-9410859	TACCTAAC	0.856438	MA1036.1	Tryptophan cluster factors	-1000 bp to TSS
MYB46	-9410851	-9410859	TACCTAAC	0.977323	MA1040.1	Tryptophan cluster factors	-1000 bp to TSS
MYB59	-9410851	-9410859	TACCTAAC	0.999521	MA1042.1	Tryptophan cluster factors	-1000 bp to TSS
Os05g0497200	-9410819	-9410827	CGACGCCG	0.523859	MA1034.1	AP2/ERF domain	-1000 bp to TSS
At2g45680	-9410770	-9410791	CATCTCGCTCCGGTTCCCACT	0.226785	MA1285.1	Basic helix-loop-helix factors (bHLH)	-1000 bp to TSS
TCP7	-9410779	-9410790	CCGGTTCCCAC	0.554514	MA1291.1	Basic helix-loop-helix factors (bHLH)	-1000 bp to TSS
AT5G67000	-9410699	-9410714	TCTCCACGGCGGCGT	0.66162	MA1261.1	AP2/ERF domain	-1000 bp to TSS
CRF2	-9410706	-9410714	GGCGGCGT	0.759958	MA0975.1	AP2/ERF domain	-1000 bp to TSS
CRF4	-9410706	-9410714	GGCGGCGT	0.78747	MA0976.1	AP2/ERF domain	-1000 bp to TSS
ERF069	-9410705	-9410714	CGGCGGCGT	0.888084	MA0997.1	AP2/ERF domain	-1000 bp to TSS
ERF096	-9410704	-9410714	ACGGCGGCGT	0.872053	MA0998.1	AP2/ERF domain	-1000 bp to TSS
ERF098	-9410706	-9410714	GGCGGCGT	0.896859	MA0999.1	AP2/ERF domain	-1000 bp to TSS
ERF109	-9410706	-9410714	GGCGGCGT	0.727661	MA1053.1	AP2/ERF domain	-1000 bp to TSS
ERF11	-9410704	-9410714	ACGGCGGCGT	0.857595	MA1001.1	AP2/ERF domain	-1000 bp to TSS
ERF4	-9410706	-9410714	GGCGGCGT	0.858174	MA0992.1	AP2/ERF domain	-1000 bp to TSS
ERF6	-9410704	-9410714	ACGGCGGCGT	0.694593	MA1006.1	AP2/ERF domain	-1000 bp to TSS
ERF008	-9410705	-9410713	CGGCGGCG	0.978673	MA0979.1	AP2/ERF domain	-1000 bp to TSS
ERF094	-9410705	-9410713	CGGCGGCG	1.00018	MA1049.1	AP2/ERF domain	-1000 bp to TSS
ERF1B	-9410705	-9410713	CGGCGGCG	0.97392	MA0567.1	AP2/ERF domain	-1000 bp to TSS
ERF3	-9410705	-9410713	CGGCGGCG	0.986435	MA1005.1	AP2/ERF domain	-1000 bp to TSS
ERF7	-9410703	-9410713	CACGGCGGCG	0.968703	MA0993.1	AP2/ERF domain	-1000 bp to TSS
ERF8	-9410703	-9410713	CACGGCGGCG	0.953986	MA0994.1	AP2/ERF domain	-1000 bp to TSS
Os05g0497200	-9410705	-9410713	CGGCGGCG	1.00017	MA1034.1	AP2/ERF domain	-1000 bp to TSS
abi4	-9410703	-9410713	CACGGCGGCG	0.677947	MA0123.1	AP2/ERF domain	-1000 bp to TSS
CDC5	-9410676	-9410687	GGCTCATCGTG	0.605037	MA0579.1	Tryptophan cluster factors	-1000 bp to TSS
TGA1A	-9410666	-9410673	TGACGTA	0.998669	MA0129.1	Basic leucine zipper factors (bZIP)	-1000 bp to TSS
MNB1A	-9410585	-9410590	GCTTT	1.00057	MA0053.1	C2H2 zinc finger factors	-1000 bp to TSS
REF6	-9410577	-9410588	GAAACAGAGCT	0.87803	MA1415.1	C2H2 zinc finger factors	-1000 bp to TSS
GATA19	-9410548	-9410559	CTGATCCGAAT	0.731137	MA1323.1	Other C4 zinc finger-type factors	-1000 bp to TSS
ABF1	-9410517	-9410536	GTAGACCTGGCAGAAACAG	0.272405	MA0570.1	Basic leucine zipper factors (bZIP)	-1000 bp to TSS
bZIP16	-9410514	-9410529	TTCGTAGACCTGGCA	0.447153	MA1349.1	Basic leucine zipper factors (bZIP)	-1000 bp to TSS
WRKY47	-9410511	-9410525	CTCTTCGTAGACCT	0.599132	MA1312.1	WRKY	-1000 bp to TSS
AT1G76870	-9410447	-9410461	TACCGGTTTTGAGG	0.841766	MA1367.1	Helix-Turn-Helix	-1000 bp to TSS

## Sheet: AT1G55260_motif_result
motif name	Start	End	Sequence	Motif_Score	motif ID	motif class	promoter search window
AG	20613676	20613694	CTTACCTATATTGGTCAA	0.61863	MA0005.2	MADS box factors	-1000 bp to TSS
AGL1	20613676	20613694	CTTACCTATATTGGTCAA	0.69658	MA0585.1	MADS box factors	-1000 bp to TSS
AT1G76880	20613724	20613740	TCGGTAAAAATAAAAA	0.767836	MA1366.1	Helix-Turn-Helix	-1000 bp to TSS
AT5G47660	20613724	20613739	TCGGTAAAAATAAAA	0.724968	MA1365.1	Helix-Turn-Helix	-1000 bp to TSS
AHL25	20613792	20613800	AATTAATT	1	MA0934.1	A.T hook factors	-1000 bp to TSS
AP1	20613804	20613817	CCAGAAAAGGACA	0.737987	MA0940.1	MADS box factors	-1000 bp to TSS
IDD4	20613805	20613822	CAGAAAAGGACAATAAT	0.630017	MA1371.1	C2H2 zinc finger factors	-1000 bp to TSS
IDD5	20613805	20613821	CAGAAAAGGACAATAA	0.559784	MA1370.1	C2H2 zinc finger factors	-1000 bp to TSS
IDD7	20613805	20613823	CAGAAAAGGACAATAATT	0.546707	MA1374.1	C2H2 zinc finger factors	-1000 bp to TSS
NUC	20613805	20613825	CAGAAAAGGACAATAATTCG	0.546493	MA1157.1	C2H2	-1000 bp to TSS
HAT5	20613814	20613826	ACAATAATTCGA	0.674699	MA0008.2	Homeo domain factors	-1000 bp to TSS
TRB2	20613877	20613885	CTAGGGCT	0.98152	MA1073.1	Tryptophan cluster factors	-1000 bp to TSS
ANL2	20613891	20613902	TCATTAATTGC	0.876332	MA1375.1	Homeo domain factors	-1000 bp to TSS
EDT1	20613891	20613901	TCATTAATTG	0.843434	MA0990.1	Homeo domain factors	-1000 bp to TSS
HDG1	20613891	20613902	TCATTAATTGC	0.900361	MA1369.1	Homeo domain factors	-1000 bp to TSS
SVP	20613968	20613988	GGTTCAAAAAATGGAATAAT	0.493133	MA0555.1	MADS box factors	-1000 bp to TSS
AGL63	20613970	20613985	TTCAAAAAATGGAAT	0.565745	MA1203.1	MADS box factors	-1000 bp to TSS
AGL55	20614014	20614020	TGGTGA	1.00052	MA1202.1	MADS box factors	-1000 bp to TSS
AHL25	20614028	20614036	AATTAATT	1	MA0934.1	A.T hook factors	-1000 bp to TSS
bZIP16	20614047	20614062	TGTTGCGACGTGACA	0.414264	MA1349.1	Basic leucine zipper factors (bZIP)	-1000 bp to TSS
bZIP53	20614047	20614062	TGTTGCGACGTGACA	0.348951	MA1341.1	Basic leucine zipper factors (bZIP)	-1000 bp to TSS
HY5	20614048	20614064	GTTGCGACGTGACACC	0.357169	MA0551.1	Basic leucine zipper factors (bZIP)	-1000 bp to TSS
AREB3	20614050	20614065	TGCGACGTGACACCA	0.416598	MA1338.1	Basic leucine zipper factors (bZIP)	-1000 bp to TSS
At3g09600	20614089	20614101	ATATAAATATCT	0.853099	MA1182.1	Helix-Turn-Helix	-1000 bp to TSS
RVE1	20614089	20614103	ATATAAATATCTCT	0.804634	MA1184.1	Helix-Turn-Helix	-1000 bp to TSS
At4g01280	20614090	20614101	TATAAATATCT	0.846392	MA1190.1	Helix-Turn-Helix	-1000 bp to TSS
At5g52660	20614090	20614101	TATAAATATCT	0.822013	MA1183.1	Helix-Turn-Helix	-1000 bp to TSS
EPR1	20614091	20614103	ATAAATATCTCT	0.757252	MA1401.1	Helix-Turn-Helix	-1000 bp to TSS
LCL1	20614091	20614101	ATAAATATCT	0.840422	MA1187.1	Helix-Turn-Helix	-1000 bp to TSS
LHY1	20614091	20614101	ATAAATATCT	0.919123	MA1185.1	Helix-Turn-Helix	-1000 bp to TSS
CCA1	20614093	20614101	AAATATCT	1	MA0972.1	Tryptophan cluster factors	-1000 bp to TSS
AT1G68670	20614238	20614251	GATTTAGAGATTC	0.665752	MA1390.1	Other	-1000 bp to TSS
BHLH34	20614281	20614289	CCACATGC	0.789296	MA0962.1	Basic helix-loop-helix factors (bHLH)	-1000 bp to TSS
AP3	20614302	20614317	TGTCTACTTTTAGAA	0.635239	MA0556.1	MADS box factors	-1000 bp to TSS
At1g49010	20614331	20614346	TTCAATCTTATCAAA	0.668136	MA1186.1	Helix-Turn-Helix	-1000 bp to TSS
At3g09600	20614410	20614422	AAACAAATATCT	0.821456	MA1182.1	Helix-Turn-Helix	-1000 bp to TSS
RVE1	20614410	20614424	AAACAAATATCTAC	0.821828	MA1184.1	Helix-Turn-Helix	-1000 bp to TSS
At4g01280	20614411	20614422	AACAAATATCT	0.795062	MA1190.1	Helix-Turn-Helix	-1000 bp to TSS
At5g52660	20614411	20614422	AACAAATATCT	0.765542	MA1183.1	Helix-Turn-Helix	-1000 bp to TSS
CCA1	20614414	20614422	AAATATCT	1	MA0972.1	Tryptophan cluster factors	-1000 bp to TSS
GT3a	20614629	20614646	CACACGTTCAAAAATTA	0.567502	MA1207.1	Helix-Turn-Helix	-1000 bp to TSS
ANL2	20614655	20614666	GCAATAAATGA	0.760631	MA1375.1	Homeo domain factors	-1000 bp to TSS
HDG1	20614655	20614666	GCAATAAATGA	0.783185	MA1369.1	Homeo domain factors	-1000 bp to TSS
GT3a	20614752	20614769	GACACGTTTCTATCTAG	0.605163	MA1207.1	Helix-Turn-Helix	-1000 bp to TSS
SPL13	20614885	20614896	AGTGTACGAAC	0.752534	MA1321.1	SBP-type zinc finger	-1000 bp to TSS
bHLH69	20614904	20614919	AGAACTATCCACGTG	0.38973	MA1363.1	Basic helix-loop-helix factors (bHLH)	-1000 bp to TSS
HY5	20614908	20614924	CTATCCACGTGTATTC	0.399464	MA0551.1	Basic leucine zipper factors (bZIP)	-1000 bp to TSS
AT1G78700	20614910	20614921	ATCCACGTGTA	0.515553	MA1331.1	Other	-1000 bp to TSS
AT4G36780	20614910	20614921	ATCCACGTGTA	0.506297	MA1332.1	Other	-1000 bp to TSS
BZR1	20614910	20614930	ATCCACGTGTATTCCGTACG	0.395927	MA0550.2	Other	-1000 bp to TSS
PIF3	20614910	20614920	ATCCACGTGT	0.798935	MA0560.1	Basic helix-loop-helix factors (bHLH)	-1000 bp to TSS
ABF2	20614911	20614924	TCCACGTGTATTC	0.71883	MA0941.1	Basic leucine zipper factors (bZIP)	-1000 bp to TSS
PHYPADRAFT_143875	20614911	20614921	TCCACGTGTA	0.724092	MA0988.1	Basic helix-loop-helix factors (bHLH)	-1000 bp to TSS
PIF4	20614911	20614919	TCCACGTG	0.845744	MA0561.1	Basic helix-loop-helix factors (bHLH)	-1000 bp to TSS
SPT	20614911	20614920	TCCACGTGT	0.787979	MA1061.1	Basic helix-loop-helix factors (bHLH)	-1000 bp to TSS
bHLH18	20614911	20614928	TCCACGTGTATTCCGTA	0.463463	MA1361.1	Basic helix-loop-helix factors (bHLH)	-1000 bp to TSS
ABF3	20614912	20614920	CCACGTGT	0.641679	MA0930.1	Basic leucine zipper factors (bZIP)	-1000 bp to TSS
ABI5	20614912	20614922	CCACGTGTAT	0.752682	MA0931.1	Basic leucine zipper factors (bZIP)	-1000 bp to TSS
BHLH13	20614912	20614920	CCACGTGT	0.703373	MA0958.1	Basic helix-loop-helix factors (bHLH)	-1000 bp to TSS
BHLH3	20614912	20614920	CCACGTGT	0.706383	MA0957.1	Basic helix-loop-helix factors (bHLH)	-1000 bp to TSS
BHLH34	20614912	20614920	CCACGTGT	0.814691	MA0962.1	Basic helix-loop-helix factors (bHLH)	-1000 bp to TSS
DYT1	20614912	20614926	CCACGTGTATTCCG	0.280475	MA0580.1	Basic helix-loop-helix factors (bHLH)	-1000 bp to TSS
MYC2	20614912	20614920	CCACGTGT	0.704205	MA0566.1	Basic helix-loop-helix factors (bHLH)	-1000 bp to TSS
MYC3	20614912	20614920	CCACGTGT	0.861361	MA0568.1	Basic helix-loop-helix factors (bHLH)	-1000 bp to TSS
MYC4	20614912	20614920	CCACGTGT	0.75445	MA0569.1	Basic helix-loop-helix factors (bHLH)	-1000 bp to TSS
PHYPADRAFT_48267	20614912	20614920	CCACGTGT	0.816011	MA1021.1	Basic helix-loop-helix factors (bHLH)	-1000 bp to TSS
PIF1	20614912	20614926	CCACGTGTATTCCG	0.684529	MA0552.1	Basic helix-loop-helix factors (bHLH)	-1000 bp to TSS
UNE10	20614912	20614920	CCACGTGT	0.825929	MA1074.1	Basic helix-loop-helix factors (bHLH)	-1000 bp to TSS
SPL15	20614920	20614934	ATTCCGTACGTTGG	0.614789	MA1320.1	SBP-type zinc finger	-1000 bp to TSS
SPL11	20614921	20614933	TTCCGTACGTTG	0.802803	MA1056.1	SBP-type zinc finger	-1000 bp to TSS
SPL13	20614921	20614932	TTCCGTACGTT	0.818821	MA1321.1	SBP-type zinc finger	-1000 bp to TSS
SPL4	20614921	20614930	TTCCGTACG	0.864816	MA1058.1	SBP-type zinc finger	-1000 bp to TSS
SPL5	20614921	20614933	TTCCGTACGTTG	0.79889	MA1059.2	SBP-type zinc finger	-1000 bp to TSS
SPL9	20614921	20614932	TTCCGTACGTT	0.81654	MA1322.1	SBP-type zinc finger	-1000 bp to TSS
SPL12	20614922	20614930	TCCGTACG	0.920714	MA1057.1	SBP-type zinc finger	-1000 bp to TSS
SPL14	20614922	20614933	TCCGTACGTTG	0.890501	MA0586.2	SBP-type zinc finger	-1000 bp to TSS
SPL7	20614922	20614930	TCCGTACG	0.780732	MA1060.1	SBP-type zinc finger	-1000 bp to TSS
POPTR_0002s00440g	20614923	20614930	CCGTACG	0.976566	MA0955.1	SBP-type zinc finger	-1000 bp to TSS
SPL1	20614923	20614931	CCGTACGT	0.675536	MA1055.1	SBP-type zinc finger	-1000 bp to TSS
NAC043	20615056	20615066	TTAACGCAAC	0.831494	MA1045.1	NAC/NAM	-1000 bp to TSS
SIZF2	20615114	20615124	CACTGACTGT	0.662067	MA1405.1	C2H2 zinc finger factors	-1000 bp to TSS
MNB1A	20615227	20615232	GCTTT	1.00057	MA0053.1	C2H2 zinc finger factors	-1000 bp to TSS
AT3G10580	20615253	20615268	ATAAATGATAAGCAT	0.695888	MA1194.1	Helix-Turn-Helix	-1000 bp to TSS
WRKY26	20615287	20615300	AGTTTTGACCTTT	0.602473	MA1297.1	WRKY	-1000 bp to TSS
WRKY59	20615289	20615301	TTTTGACCTTTT	0.821256	MA1304.1	WRKY	-1000 bp to TSS
MNB1A	20615491	20615496	GCTTT	1.00057	MA0053.1	C2H2 zinc finger factors	-1000 bp to TSS

## Sheet: AT5G46830_motif_result
motif name	Start	End	Sequence	Motif_Score	motif ID	motif class	promoter search window
OBP4	19001608	19001622	AATTTAACTTTTTT	0.82991	MA1280.1	C2H2 zinc finger factors	-1000 bp to TSS
AGL3	19001678	19001696	GATACTATATATGGAACC	0.906735	MA0001.2	MADS box factors	-1000 bp to TSS
SPL8	19001938	19001954	AGAATGGTACAAAATT	0.795065	MA0578.1	SBP-type zinc finger	-1000 bp to TSS
AT1G76880	19001955	19001971	AAAGTAAAATAGAAAA	0.693533	MA1366.1	Helix-Turn-Helix	-1000 bp to TSS
AT3G25990	19001969	19001990	AACTATAGTTCGGTTCTGTTT	0.198642	MA1368.1	Helix-Turn-Helix	-1000 bp to TSS
MYB101	19001975	19001990	AGTTCGGTTCTGTTT	0.733318	MA1173.1	Helix-Turn-Helix	-1000 bp to TSS
At5g08520	19002009	19002022	AAAAAAGATAAGA	0.710732	MA1399.1	Helix-Turn-Helix	-1000 bp to TSS
ATHB24	19002057	19002072	AGAAGTGATTAAGGT	0.759358	MA1330.1	Homeo domain factors	-1000 bp to TSS
AT3G57600	19002069	19002080	GGTGGTGGTGG	0.707553	MA1242.1	AP2/ERF domain	-1000 bp to TSS
RAP212	19002130	19002151	GTGTGTCAATTGCGGCGGCAA	0.537698	MA1256.1	AP2/ERF domain	-1000 bp to TSS
ABR1	19002131	19002150	TGTGTCAATTGCGGCGGCA	0.578953	MA1244.1	AP2/ERF domain	-1000 bp to TSS
ERF11	19002138	19002148	ATTGCGGCGG	0.863375	MA1001.1	AP2/ERF domain	-1000 bp to TSS
ERF069	19002139	19002148	TTGCGGCGG	0.854073	MA0997.1	AP2/ERF domain	-1000 bp to TSS
ERF112	19002139	19002149	TTGCGGCGGC	0.869271	MA1002.1	AP2/ERF domain	-1000 bp to TSS
RAP26	19002139	19002154	TTGCGGCGGCAATAA	0.53308	MA1221.1	AP2/ERF domain	-1000 bp to TSS
CRF2	19002140	19002148	TGCGGCGG	0.805157	MA0975.1	AP2/ERF domain	-1000 bp to TSS
ERF109	19002140	19002148	TGCGGCGG	0.783652	MA1053.1	AP2/ERF domain	-1000 bp to TSS
ERF4	19002140	19002148	TGCGGCGG	0.794753	MA0992.1	AP2/ERF domain	-1000 bp to TSS
AT1G12630	19002141	19002162	GCGGCGGCAATAATGGTGATG	0.519721	MA1227.1	AP2/ERF domain	-1000 bp to TSS
ERF6	19002141	19002151	GCGGCGGCAA	0.721102	MA1006.1	AP2/ERF domain	-1000 bp to TSS
HAT5	19002147	19002159	GCAATAATGGTG	0.707597	MA0008.2	Homeo domain factors	-1000 bp to TSS
AGL55	19002154	19002160	TGGTGA	1.00052	MA1202.1	MADS box factors	-1000 bp to TSS
AGL55	19002198	19002204	TGGTGA	1.00052	MA1202.1	MADS box factors	-1000 bp to TSS
AGL55	19002213	19002219	TGGTGA	1.00052	MA1202.1	MADS box factors	-1000 bp to TSS
ATHB15	19002217	19002232	GATGGTGATGATGGT	0.722897	MA1026.2	Homeo domain factors	-1000 bp to TSS
AGL55	19002219	19002225	TGGTGA	1.00052	MA1202.1	MADS box factors	-1000 bp to TSS
AGL42	19002223	19002230	GATGATG	1.00036	MA1201.1	MADS box factors	-1000 bp to TSS
ATHB15	19002255	19002270	GGATGCGATGATGAT	0.660709	MA1026.2	Homeo domain factors	-1000 bp to TSS
DREB2	19002263	19002284	TGATGATGACGGTTGCAAGGG	0.527036	MA1258.1	AP2/ERF domain	-1000 bp to TSS
MYB77	19002263	19002278	TGATGATGACGGTTG	0.776364	MA1395.1	Helix-Turn-Helix	-1000 bp to TSS
AGL42	19002264	19002271	GATGATG	1.00036	MA1201.1	MADS box factors	-1000 bp to TSS
AGL55	19002310	19002316	TGGTGA	1.00052	MA1202.1	MADS box factors	-1000 bp to TSS
At5g08520	19002317	19002330	TGTGTAGATAAGA	0.708931	MA1399.1	Helix-Turn-Helix	-1000 bp to TSS
At5g58900	19002319	19002334	TGTAGATAAGAGTAC	0.688783	MA1192.1	Helix-Turn-Helix	-1000 bp to TSS
AT3G25990	19002387	19002408	GTTAGTTTCTTAATTATAGTT	0.26929	MA1368.1	Helix-Turn-Helix	-1000 bp to TSS
ATHB24	19002393	19002408	TTCTTAATTATAGTT	0.790628	MA1330.1	Homeo domain factors	-1000 bp to TSS
ARF3	19002433	19002441	TCCCGACA	0.95096	MA1009.1	B3 domain	-1000 bp to TSS
ARF8	19002434	19002443	CCCGACATA	0.839561	MA0944.1	B3 domain	-1000 bp to TSS
DRE1C	19002434	19002442	CCCGACAT	0.590221	MA0985.1	Beta-Hairpin-Ribbon	-1000 bp to TSS
ARALYDRAFT_496250	19002505	19002513	GTGGTCCT	0.490711	MA1096.1	Basic helix-loop-helix factors (bHLH)	-1000 bp to TSS
TCP4	19002505	19002513	GTGGTCCT	0.793091	MA1035.1	Basic helix-loop-helix factors (bHLH)	-1000 bp to TSS
TCP5	19002505	19002513	GTGGTCCT	0.445573	MA1067.1	Basic helix-loop-helix factors (bHLH)	-1000 bp to TSS
AGL55	19002519	19002525	TGGTGA	1.00052	MA1202.1	MADS box factors	-1000 bp to TSS
AT1G78700	19002609	19002620	GCACTCGTGTG	0.448758	MA1331.1	Other	-1000 bp to TSS
AT4G36780	19002609	19002620	GCACTCGTGTG	0.418902	MA1332.1	Other	-1000 bp to TSS
BZR1	19002609	19002629	GCACTCGTGTGAAACAAAAT	0.462104	MA0550.2	Other	-1000 bp to TSS
BZR2	19002610	19002621	CACTCGTGTGA	0.668636	MA0549.1	Unidentified class	-1000 bp to TSS
ABF3	19002611	19002619	ACTCGTGT	0.590491	MA0930.1	Basic leucine zipper factors (bZIP)	-1000 bp to TSS
SPL8	19002628	19002644	TAAAGAGTACACTCTA	0.795932	MA0578.1	SBP-type zinc finger	-1000 bp to TSS
ARF1	19002727	19002735	ACCGACGA	0.784886	MA0942.1	B3 domain	-1000 bp to TSS
LFY	19002758	19002777	TCTTGACCTCCGATCCGTC	0.36832	MA0590.1	Unidentified class	-1000 bp to TSS
ERF9	19002772	19002793	CCGTCGCCACCATTACTTCCG	0.461058	MA1257.1	AP2/ERF domain	-1000 bp to TSS
RAP212	19002772	19002793	CCGTCGCCACCATTACTTCCG	0.454831	MA1256.1	AP2/ERF domain	-1000 bp to TSS
ERF105	19002773	19002788	CGTCGCCACCATTAC	0.502535	MA1000.2	AP2/ERF domain	-1000 bp to TSS
ARR1	19002792	19002802	GGCGAATCTC	0.975261	MA0945.1	Tryptophan cluster factors	-1000 bp to TSS
ARR18	19002792	19002805	GGCGAATCTCAGC	0.737361	MA0948.1	Tryptophan cluster factors	-1000 bp to TSS
ARR10	19002793	19002801	GCGAATCT	0.914903	MA0121.1	Tryptophan cluster factors	-1000 bp to TSS
ARR14	19002793	19002801	GCGAATCT	0.959395	MA0947.1	Tryptophan cluster factors	-1000 bp to TSS
At1g72010	19002843	19002856	GAATGGAACCCAC	0.452369	MA1288.1	Basic helix-loop-helix factors (bHLH)	-1000 bp to TSS
At2g45680	19002844	19002865	AATGGAACCCACGAGCCCTGG	0.455799	MA1285.1	Basic helix-loop-helix factors (bHLH)	-1000 bp to TSS
At5g08330	19002844	19002858	AATGGAACCCACGA	0.490524	MA1287.1	Basic helix-loop-helix factors (bHLH)	-1000 bp to TSS
TCP1	19002844	19002874	AATGGAACCCACGAGCCCTGGAGTTACGCC	0.22593	MA1284.1	Basic helix-loop-helix factors (bHLH)	-1000 bp to TSS
TCP14	19002845	19002865	ATGGAACCCACGAGCCCTGG	0.131886	MA1283.1	Basic helix-loop-helix factors (bHLH)	-1000 bp to TSS
TCP7	19002845	19002856	ATGGAACCCAC	0.661289	MA1291.1	Basic helix-loop-helix factors (bHLH)	-1000 bp to TSS
TCP19	19002846	19002856	TGGAACCCAC	0.690962	MA1063.1	Basic helix-loop-helix factors (bHLH)	-1000 bp to TSS
NAC043	19002866	19002876	GTTACGCCAT	0.827081	MA1045.1	NAC/NAM	-1000 bp to TSS
SMZ	19002887	19002895	CGTCGTAC	0.870289	MA0553.1	AP2/ERF domain	-1000 bp to TSS
SPL4	19002887	19002896	CGTCGTACG	0.840455	MA1058.1	SBP-type zinc finger	-1000 bp to TSS
SPL7	19002888	19002896	GTCGTACG	0.919511	MA1060.1	SBP-type zinc finger	-1000 bp to TSS
SPL1	19002889	19002897	TCGTACGA	0.510106	MA1055.1	SBP-type zinc finger	-1000 bp to TSS
bZIP50	19003083	19003100	TGAAGACGACGTCAGTG	0.479095	MA1342.1	Basic leucine zipper factors (bZIP)	-1000 bp to TSS
TGA10	19003087	19003102	GACGACGTCAGTGAT	0.550227	MA1346.1	Basic leucine zipper factors (bZIP)	-1000 bp to TSS
TGA3	19003087	19003101	GACGACGTCAGTGA	0.434502	MA1336.1	Basic leucine zipper factors (bZIP)	-1000 bp to TSS
TGA9	19003088	19003099	ACGACGTCAGT	0.582403	MA1348.1	Basic leucine zipper factors (bZIP)	-1000 bp to TSS
BZIP60	19003089	19003097	CGACGTCA	0.796937	MA0967.1	Basic leucine zipper factors (bZIP)	-1000 bp to TSS
TGA1	19003089	19003100	CGACGTCAGTG	0.736489	MA0588.1	Basic leucine zipper factors (bZIP)	-1000 bp to TSS
TGA4	19003089	19003100	CGACGTCAGTG	0.677213	MA1335.1	Basic leucine zipper factors (bZIP)	-1000 bp to TSS
TGA6	19003089	19003099	CGACGTCAGT	0.810166	MA1069.1	Basic leucine zipper factors (bZIP)	-1000 bp to TSS
TGA7	19003089	19003099	CGACGTCAGT	0.70116	MA1070.1	Basic leucine zipper factors (bZIP)	-1000 bp to TSS
bZIP14	19003089	19003099	CGACGTCAGT	0.741049	MA1407.1	Basic leucine zipper factors (bZIP)	-1000 bp to TSS
TGA5	19003090	19003098	GACGTCAG	0.981623	MA1047.1	Basic leucine zipper factors (bZIP)	-1000 bp to TSS
TGA2	19003091	19003099	ACGTCAGT	0.708505	MA1068.1	Basic leucine zipper factors (bZIP)	-1000 bp to TSS
bZIP910	19003091	19003098	ACGTCAG	0.999873	MA0096.1	Basic leucine zipper factors (bZIP)	-1000 bp to TSS
AREB3	19003102	19003117	GACGATGACGTGGAA	0.524399	MA1338.1	Basic leucine zipper factors (bZIP)	-1000 bp to TSS
GBF3	19003102	19003117	GACGATGACGTGGAA	0.677122	MA1351.1	Basic leucine zipper factors (bZIP)	-1000 bp to TSS
GBF6	19003102	19003117	GACGATGACGTGGAA	0.735967	MA1334.1	Basic leucine zipper factors (bZIP)	-1000 bp to TSS
TGA10	19003102	19003117	GACGATGACGTGGAA	0.492239	MA1346.1	Basic leucine zipper factors (bZIP)	-1000 bp to TSS
bZIP16	19003102	19003117	GACGATGACGTGGAA	0.617887	MA1349.1	Basic leucine zipper factors (bZIP)	-1000 bp to TSS
bZIP28	19003102	19003117	GACGATGACGTGGAA	0.809649	MA1344.1	Basic leucine zipper factors (bZIP)	-1000 bp to TSS
bZIP3	19003102	19003117	GACGATGACGTGGAA	0.75761	MA1340.1	Basic leucine zipper factors (bZIP)	-1000 bp to TSS
bZIP44	19003102	19003117	GACGATGACGTGGAA	0.744202	MA1337.1	Basic leucine zipper factors (bZIP)	-1000 bp to TSS
bZIP48	19003102	19003116	GACGATGACGTGGA	0.718797	MA1345.1	Basic leucine zipper factors (bZIP)	-1000 bp to TSS
bZIP53	19003102	19003117	GACGATGACGTGGAA	0.725881	MA1341.1	Basic leucine zipper factors (bZIP)	-1000 bp to TSS
TGA1	19003104	19003115	CGATGACGTGG	0.921291	MA0588.1	Basic leucine zipper factors (bZIP)	-1000 bp to TSS
TGA4	19003104	19003115	CGATGACGTGG	0.804827	MA1335.1	Basic leucine zipper factors (bZIP)	-1000 bp to TSS
bZIP42	19003104	19003116	CGATGACGTGGA	0.638661	MA1350.1	Basic leucine zipper factors (bZIP)	-1000 bp to TSS
bZIP43	19003104	19003116	CGATGACGTGGA	0.645434	MA1339.1	Basic leucine zipper factors (bZIP)	-1000 bp to TSS
ABF1	19003105	19003124	GATGACGTGGAAGTGACGG	0.235079	MA0570.1	Basic leucine zipper factors (bZIP)	-1000 bp to TSS
O2	19003105	19003118	GATGACGTGGAAG	0.734453	MA1417.1	Basic leucine zipper factors (bZIP)	-1000 bp to TSS
TGA2	19003105	19003113	GATGACGT	0.973356	MA1068.1	Basic leucine zipper factors (bZIP)	-1000 bp to TSS
TGA6	19003105	19003115	GATGACGTGG	0.739547	MA1069.1	Basic leucine zipper factors (bZIP)	-1000 bp to TSS
bZIP911	19003105	19003117	GATGACGTGGAA	0.664576	MA0097.1	Basic leucine zipper factors (bZIP)	-1000 bp to TSS
TGA5	19003106	19003114	ATGACGTG	0.946169	MA1047.1	Basic leucine zipper factors (bZIP)	-1000 bp to TSS
bZIP910	19003106	19003113	ATGACGT	0.939094	MA0096.1	Basic leucine zipper factors (bZIP)	-1000 bp to TSS
TGA1A	19003107	19003114	TGACGTG	1.0004	MA0129.1	Basic leucine zipper factors (bZIP)	-1000 bp to TSS
bHLH69	19003108	19003123	GACGTGGAAGTGACG	0.414145	MA1363.1	Basic helix-loop-helix factors (bHLH)	-1000 bp to TSS
PLT1	19003136	19003155	TCTTCTTGGTTTCCATGAC	0.381127	MA1377.1	AP2/ERF domain	-1000 bp to TSS
GBF6	19003146	19003161	TTCCATGACGTGGAG	0.346861	MA1334.1	Basic leucine zipper factors (bZIP)	-1000 bp to TSS
bZIP28	19003146	19003161	TTCCATGACGTGGAG	0.623368	MA1344.1	Basic leucine zipper factors (bZIP)	-1000 bp to TSS
bZIP3	19003146	19003161	TTCCATGACGTGGAG	0.453066	MA1340.1	Basic leucine zipper factors (bZIP)	-1000 bp to TSS
bZIP44	19003146	19003161	TTCCATGACGTGGAG	0.385833	MA1337.1	Basic leucine zipper factors (bZIP)	-1000 bp to TSS
bZIP48	19003146	19003160	TTCCATGACGTGGA	0.378935	MA1345.1	Basic leucine zipper factors (bZIP)	-1000 bp to TSS
TGA1	19003148	19003159	CCATGACGTGG	0.858954	MA0588.1	Basic leucine zipper factors (bZIP)	-1000 bp to TSS
TGA4	19003148	19003159	CCATGACGTGG	0.605482	MA1335.1	Basic leucine zipper factors (bZIP)	-1000 bp to TSS
bZIP42	19003148	19003160	CCATGACGTGGA	0.23996	MA1350.1	Basic leucine zipper factors (bZIP)	-1000 bp to TSS
O2	19003149	19003162	CATGACGTGGAGT	0.48033	MA1417.1	Basic leucine zipper factors (bZIP)	-1000 bp to TSS
TGA2	19003149	19003157	CATGACGT	0.833085	MA1068.1	Basic leucine zipper factors (bZIP)	-1000 bp to TSS
TGA5	19003150	19003158	ATGACGTG	0.946169	MA1047.1	Basic leucine zipper factors (bZIP)	-1000 bp to TSS
bZIP910	19003150	19003157	ATGACGT	0.939094	MA0096.1	Basic leucine zipper factors (bZIP)	-1000 bp to TSS
TGA1A	19003151	19003158	TGACGTG	1.0004	MA0129.1	Basic leucine zipper factors (bZIP)	-1000 bp to TSS
MYB98	19003161	19003176	TTTTGGTAACGGATC	0.744056	MA1392.1	Helix-Turn-Helix	-1000 bp to TSS
MYB118	19003163	19003180	TTGGTAACGGATCCGGG	0.500926	MA1170.1	Helix-Turn-Helix	-1000 bp to TSS
MYB119	19003165	19003176	GGTAACGGATC	0.763873	MA1176.1	Helix-Turn-Helix	-1000 bp to TSS
GATA8	19003170	19003179	CGGATCCGG	0.930245	MA1017.1	Other C4 zinc finger-type factors	-1000 bp to TSS
AT1G76870	19003208	19003222	ACCCGGTTTTGGTT	0.910984	MA1367.1	Helix-Turn-Helix	-1000 bp to TSS
GATA8	19003228	19003237	TCGGATCTG	0.927532	MA1017.1	Other C4 zinc finger-type factors	-1000 bp to TSS
GATA12	19003229	19003237	CGGATCTG	0.946693	MA1015.1	Other C4 zinc finger-type factors	-1000 bp to TSS
GATA19	19003229	19003240	CGGATCTGATT	0.883344	MA1323.1	Other C4 zinc finger-type factors	-1000 bp to TSS
GATA20	19003231	19003239	GATCTGAT	0.841729	MA1324.1	Other C4 zinc finger-type factors	-1000 bp to TSS
GATA15	19003252	19003261	TGTGATCGG	0.916897	MA1016.1	Other C4 zinc finger-type factors	-1000 bp to TSS
GATA8	19003345	19003354	GAGATCCGA	0.90257	MA1017.1	Other C4 zinc finger-type factors	-1000 bp to TSS
ARR1	19003375	19003385	AGGATCCGGT	0.877605	MA0945.1	Tryptophan cluster factors	-1000 bp to TSS
GATA20	19003377	19003385	GATCCGGT	0.84928	MA1324.1	Other C4 zinc finger-type factors	-1000 bp to TSS
PHYPADRAFT_38837	19003435	19003445	GAGCTTTTCC	0.883868	MA1022.1	C2H2 zinc finger factors	-1000 bp to TSS
MNB1A	19003437	19003442	GCTTT	1.00057	MA0053.1	C2H2 zinc finger factors	-1000 bp to TSS
MYB33	19003446	19003457	ATTTCAGTTAG	0.818232	MA1391.1	Helix-Turn-Helix	-1000 bp to TSS
GBF6	19003536	19003551	CTCGACGTCATCTTC	0.537583	MA1334.1	Basic leucine zipper factors (bZIP)	-1000 bp to TSS
TGA10	19003536	19003551	CTCGACGTCATCTTC	0.607268	MA1346.1	Basic leucine zipper factors (bZIP)	-1000 bp to TSS
bZIP44	19003536	19003551	CTCGACGTCATCTTC	0.342449	MA1337.1	Basic leucine zipper factors (bZIP)	-1000 bp to TSS
[truncated: 14 more rows]

## Sheet: AT4G11670_motif_result
motif name	Start	End	Sequence	Motif_Score	motif ID	motif class	promoter search window
[truncated: 35 more rows]

[truncated: 5 more sheets: AT4G01000_motif_result, AT3G60140_motif_result, AT3G58600_motif_result, AT3G53310_motif_result, AT3G52840_motif_result]
